# Supplementary material for: Species Distribution Modelling: Contrasting presence-only models with plot abundance data
Source: PubMed Central journal article supplement (PMC5772443; doi:10.1038/s41598-017-18927-1), 2018-01-17

## **Supplemental Material**

**for**

### **Species Distribution Modelling: Contrasting presence-only models with plot abundance data**

Vitor F. Gomes\*, Stéphanie D. IJff, Niels Raes, Iêda Leão Amaral, Rafael P. Salomão, Luiz de Souza Coelho, Francisca Dionízia de Almeida Matos, Carolina V. Castilho, Diogenes de Andrade Lima Filho, Dairon Cárdenas López, Juan Ernesto Guevara, William E. Magnusson, Oliver L. Phillips, Florian Wittmann, Marcelo de Jesus Veiga Carim, Maria Pires Martins, Mariana Victória Irume, Daniel Sabatier, Jean-François Molino, Olaf S. Bánki, José Renan da Silva Guimarães, Nigel C.A. Pitman, Maria Teresa Fernandez Piedade, Abel Monteagudo Mendoza, Bruno Garcia Luize, Eduardo Martins Venticinque, Evlyn Márcia Moraes de Leão Novo, Percy Núñez Vargas, Thiago Sanna Freire Silva, Angelo Gilberto Manzatto, John Terborgh, Neidiane Farias Costa Reis, Juan Carlos Montero, Katia Regina Casula, Beatriz S. Marimon, Ben-Hur Marimon Jr., Euridice N. Honorio Coronado, Ted R. Feldpausch, Alvaro Duque, Charles Eugene Zartman, Nicolás Castaño Arboleda, Timothy J. Killeen, Bonifacio Mostacedo, Rodolfo Vasquez, Jochen Schöngart, Rafael L. Assis, Marcelo Brilhante Medeiros, Marcelo Fragomeni Simon, Ana Andrade, William F. Laurance, José Luís Camargo, Layon O. Demarchi, Susan G.W. Laurance, Emanuelle de Sousa Farias, Henrique Eduardo Mendonça Nascimento, Juan David Cardenas Revilla, Adriano Quaresma, Flávia R.C. Costa, Ima Célia Guimarães Vieira, Bruno Barçante Ladvocat Cintra, Hernán Castellanos, Roel Brien, Pablo R. Stevenson, Yuri Feitosa, Joost F. Duivenvoorden, Gerardo A. Aymard C., Hugo F. Mogollón, Natalia Targhetta, James A. Comiskey, Alberto Vicentini, Aline Lopes, Gabriel Damasco, Nállarett Dávila, Roosevelt García-Villacorta, Carolina Levis, Juliana Schiatti, Priscila Souza, Thaise Emilio, Alfonso Alonso, David Neill, Francisco Dallmeier, Leandro Valle Ferreira, Alejandro Araujo-Murakami, Daniel Praia, Dário Dantas do Amaral, Fernanda Antunes Carvalho, Fernanda Coelho de Souza, Kenneth Feeley, Luzmila Arroyo, Marcelo Petratti Pansonato, Rogerio Gribel, Boris Villa, Juan Carlos Licona,

Paul V.A. Fine, Carlos Cerón, Chris Baraloto, Eliana M. Jimenez, Juliana Stropp, Julien Engel, Julien Engel, Marcos Silveira, Maria Cristina Peñuela Mora, Pascal Petronelli, Paul Maas, Raquel Thomas-Caesar, Terry W. Henkel, Doug Daly, Marcos Ríos Paredes, Tim R. Baker, Alfredo Fuentes, Carlos A. Peres, Jerome Chave, Jose Luis Marcelo Pena, Kyle G. Dexter, Miles R. Silman, Peter Møller Jørgensen, Toby Pennington, Anthony Di Fiore, Fernando Cornejo Valverde, Juan Fernando Phillips, Gonzalo Rivas-Torres, Patricio von Hildebrand, Tinde R. van Andel, Ademir R. Ruschel, Adriana Prieto, Agustín Rudas, Bruce Hoffman, César I.A. Vela, Edelcilio Marques Barbosa, Egleé L. Zent, George Pepe Gallardo Gonzales, Hilda Paulette Dávila Doza, Ires Paula de Andrade Miranda, Jean-Louis Guillaumet, Linder Felipe Mozombite Pinto, Luiz Carlos de Matos Bonates, Natalino Silva, Ricardo Zárate Gómez, Stanford Zent, Therany Gonzales, Vincent A. Vos, Yadvinder Malhi, Alexandre A. Oliveira, Angela Cano, Bianca Weiss Albuquerque, Corine Vriesendorp, Diego Felipe Correa, Emilio Vilanova Torre, Geertje van der Heijden, Hirma Ramirez-Angulo, José Ferreira Ramos, Kenneth R. Young, Maira Rocha, Marcelo Trindade Nascimento, Maria Natalia Umaña Medina, Milton Tirado, Ophelia Wang, Rodrigo Sierra, Armando Torres-Lezama, Casimiro Mendoza, Cid Ferreira, Cláudia Baidier, Daniel Villarroel, Henrik Balslev, Italo Mesones, Ligia Estela Urrego Giraldo, Luisa Fernanda Casas, Manuel Augusto Ahuite Reategui, Reynaldo Linares-Palomino, Roderick Zagt, Sasha Cárdenas, William Farfan-Rios, Adeilza Felipe Sampaio, Daniela Pauletto, Elvis H. Valderrama Sandoval, Freddy Ramirez Arevalo, Isau Huamantupa-Chuquimaco, Karina Garcia-Cabrera, Lionel Hernandez, Luis Valenzuela Gamarra, Miguel N. Alexiades, Susamar Pansini, Walter Palacios Cuenca, William Milliken, Joana Ricardo, Gabriela Lopez-Gonzalez, Edwin Pos, Hans ter Steege\*

\*Correspondence and requests for materials should be addressed to H.T.S. (email: [hans.tersteege@naturalis.nl](mailto:hans.tersteege@naturalis.nl))



### **Appendix S3: Maps of combined MaxEnt IDW predictions.**

Combined MaxEnt's environmental suitability map and relative IDW abundance map for all 170 significant species. **(A)** Combined map of area of occupancy as predicted by MaxEnt and IDW. **(B)** MaxEnt's environmental suitability map. **(C)** Abundance map as predicted by IDW. In this map the size of the black dot represents the relative abundance of the species in the plot. The grey color signifies the interpolated values. Ranges of relative abundance of plots and interpolation are given in the figure title. Maps created with custom R script. Base map source (country.shp, rivers.shp): ESRI (<http://www.esri.com/data/basemaps>, © Esri, DeLorme Publishing Company).

Figure S3\_1A Combined map of *Acosmium\_cardenasii*

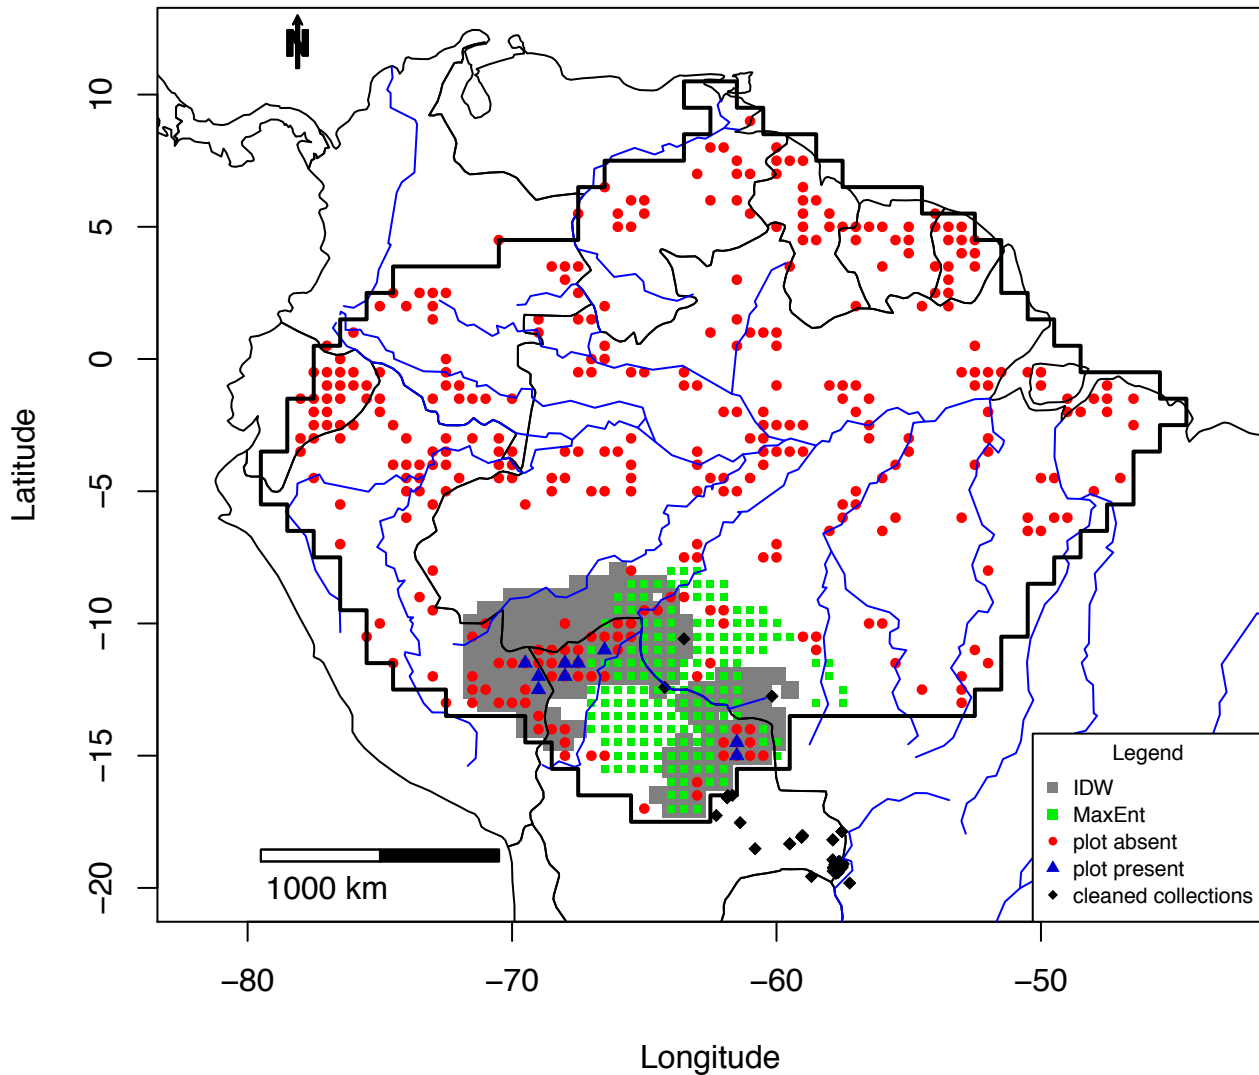

Figure S3\_1B MaxEnt map of *Acosmium\_cardenasii*

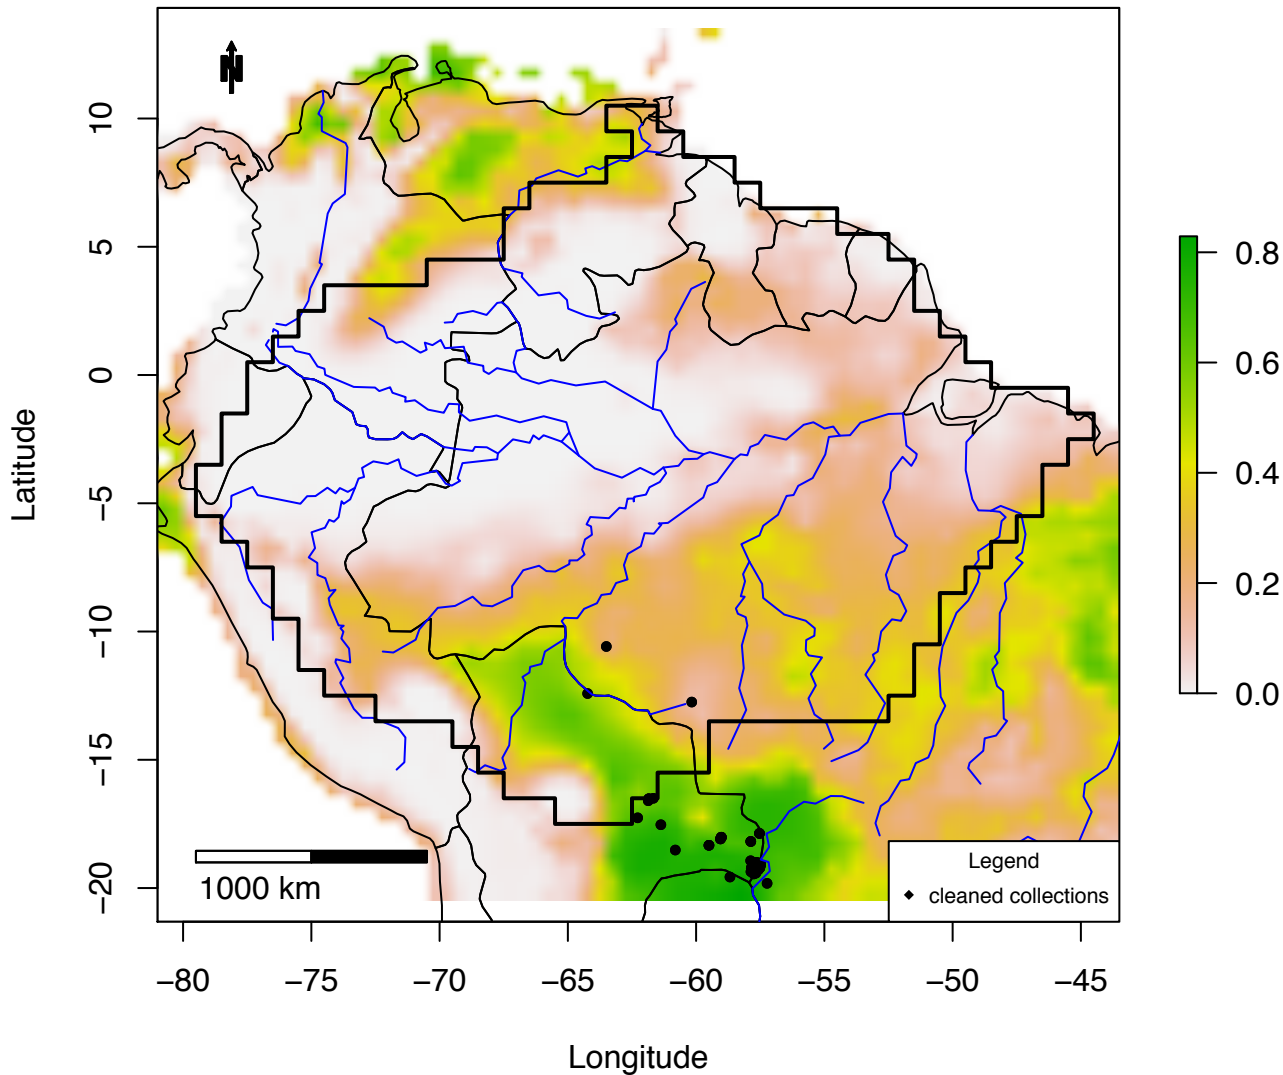

**Figure S3\_1C IDW map of *Acosmium cardenasii*:**  
plots =0 – 0.37; IDW: 0 – 0.27

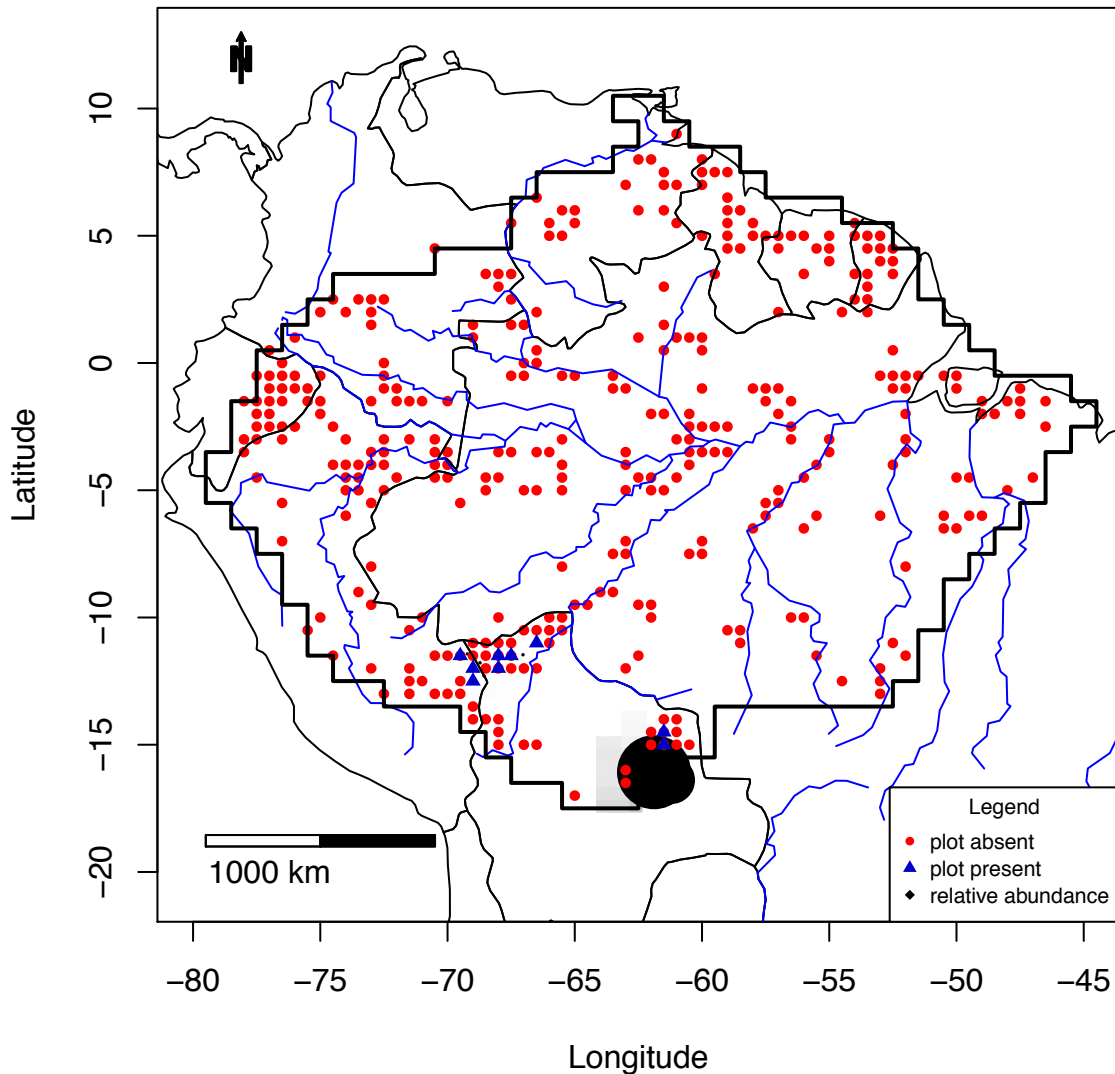

Figure S3\_2A Combined map of *Alexa imperatricis*

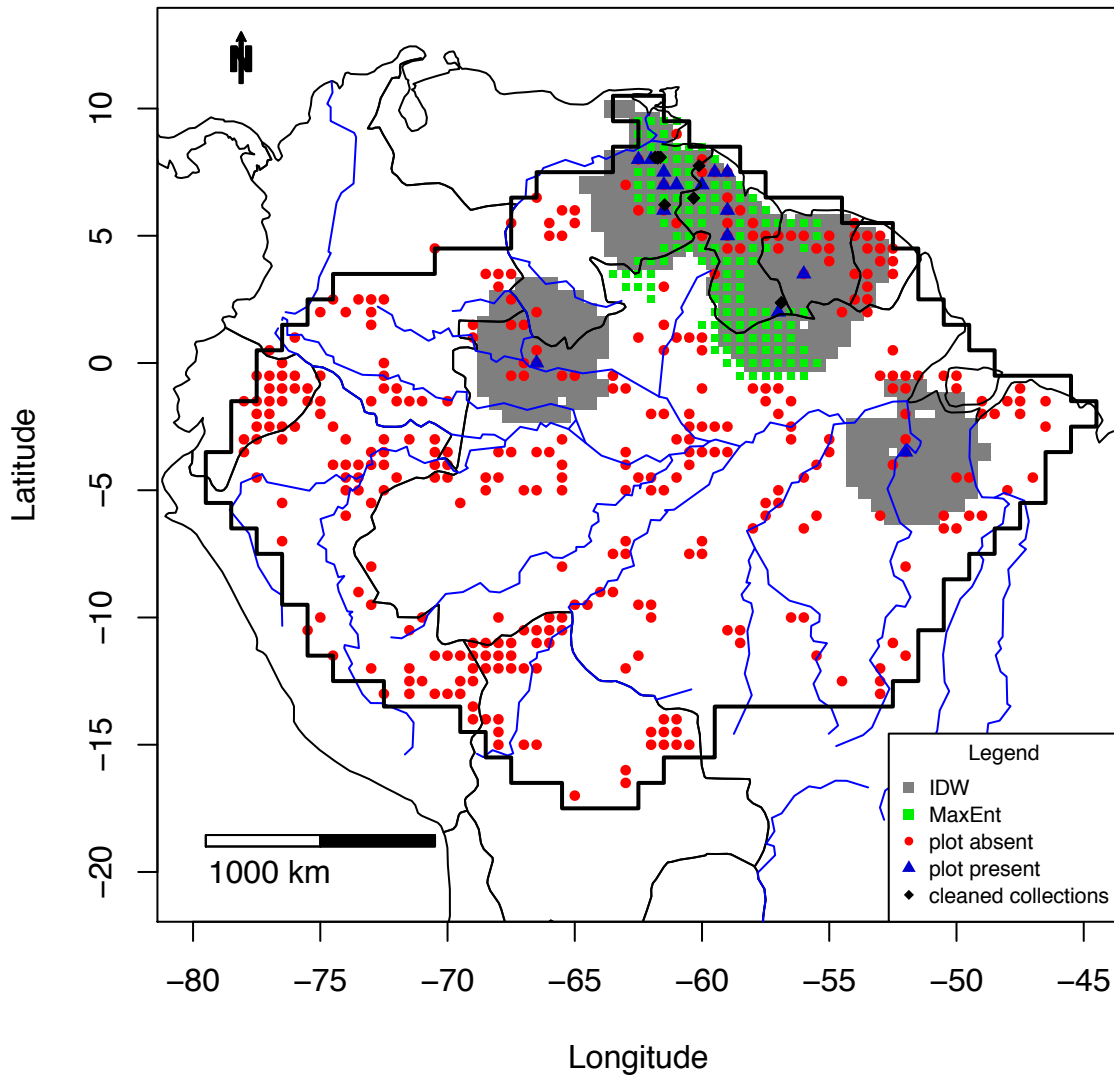

Figure S3\_2B MaxEnt map of *Alexa imperatricis*

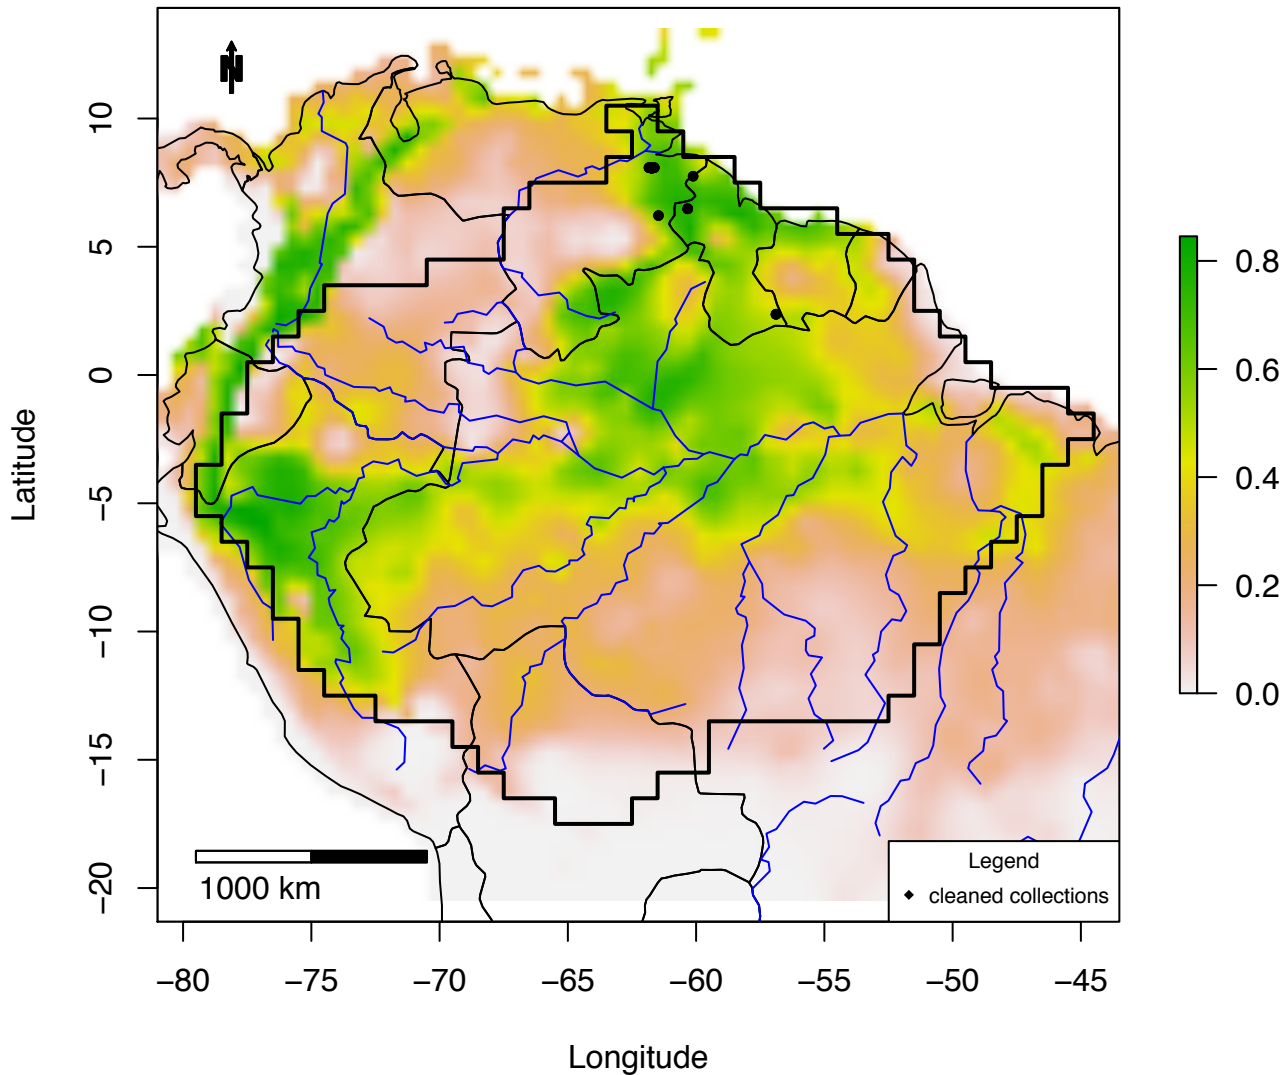

**Figure S3\_2C IDW map of *Alexa imperatricis*:**  
**plots =0 – 0.29; IDW: 0 – 0.23**

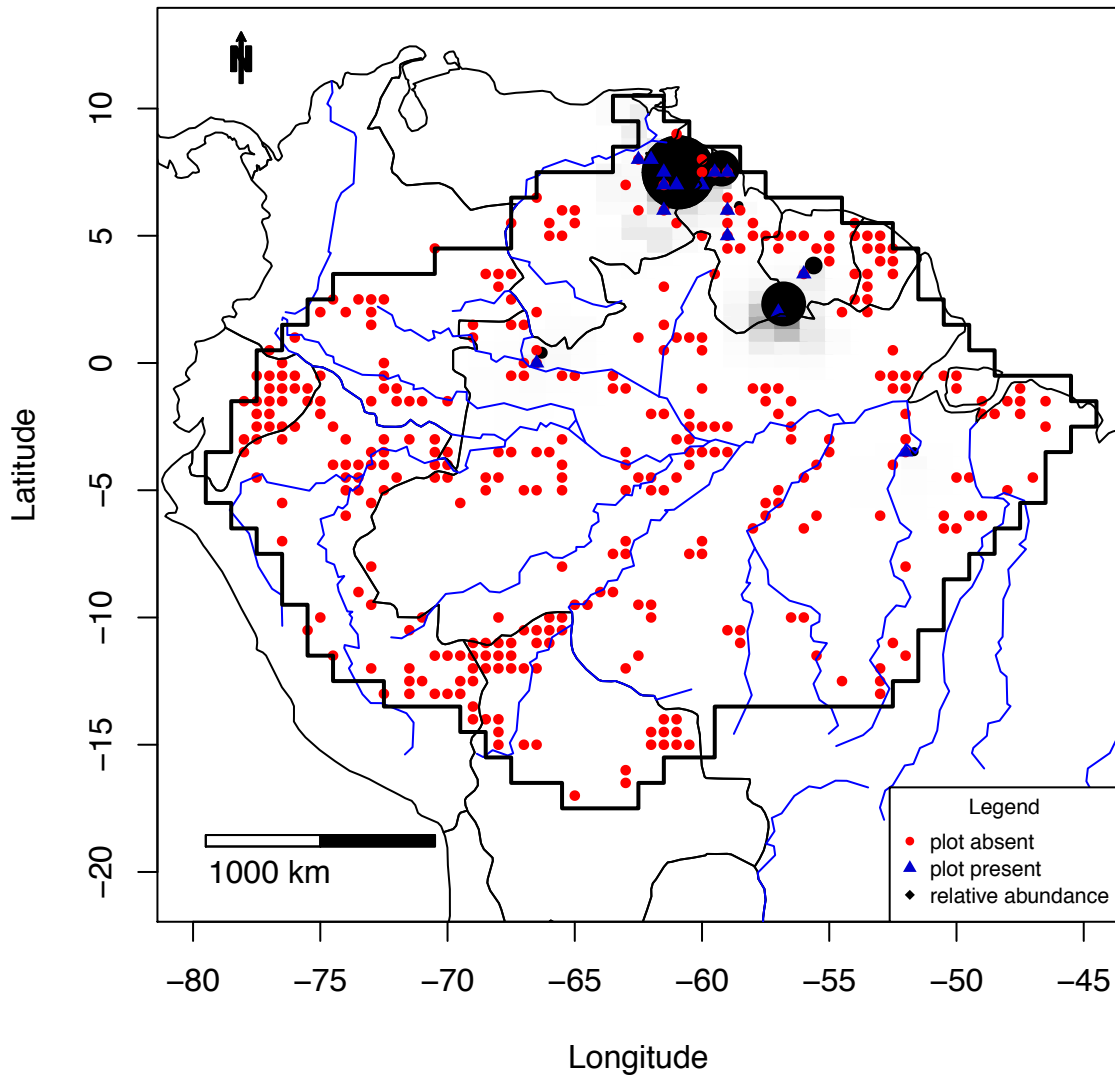

Figure S3\_3A Combined map of *Amphiodon\_effusus*

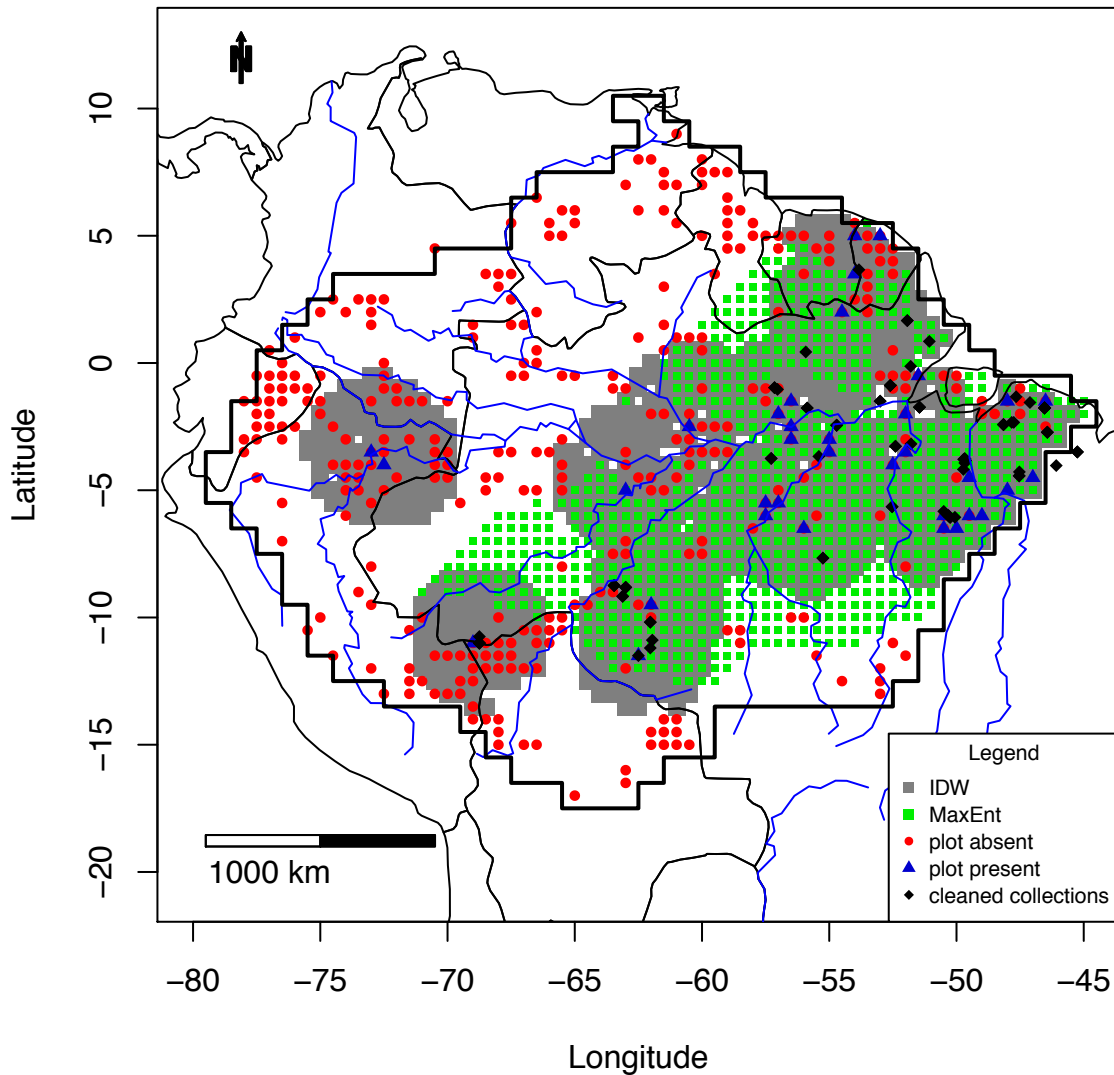



Figure S3\_3B MaxEnt map of *Amphiodon\_effusus*

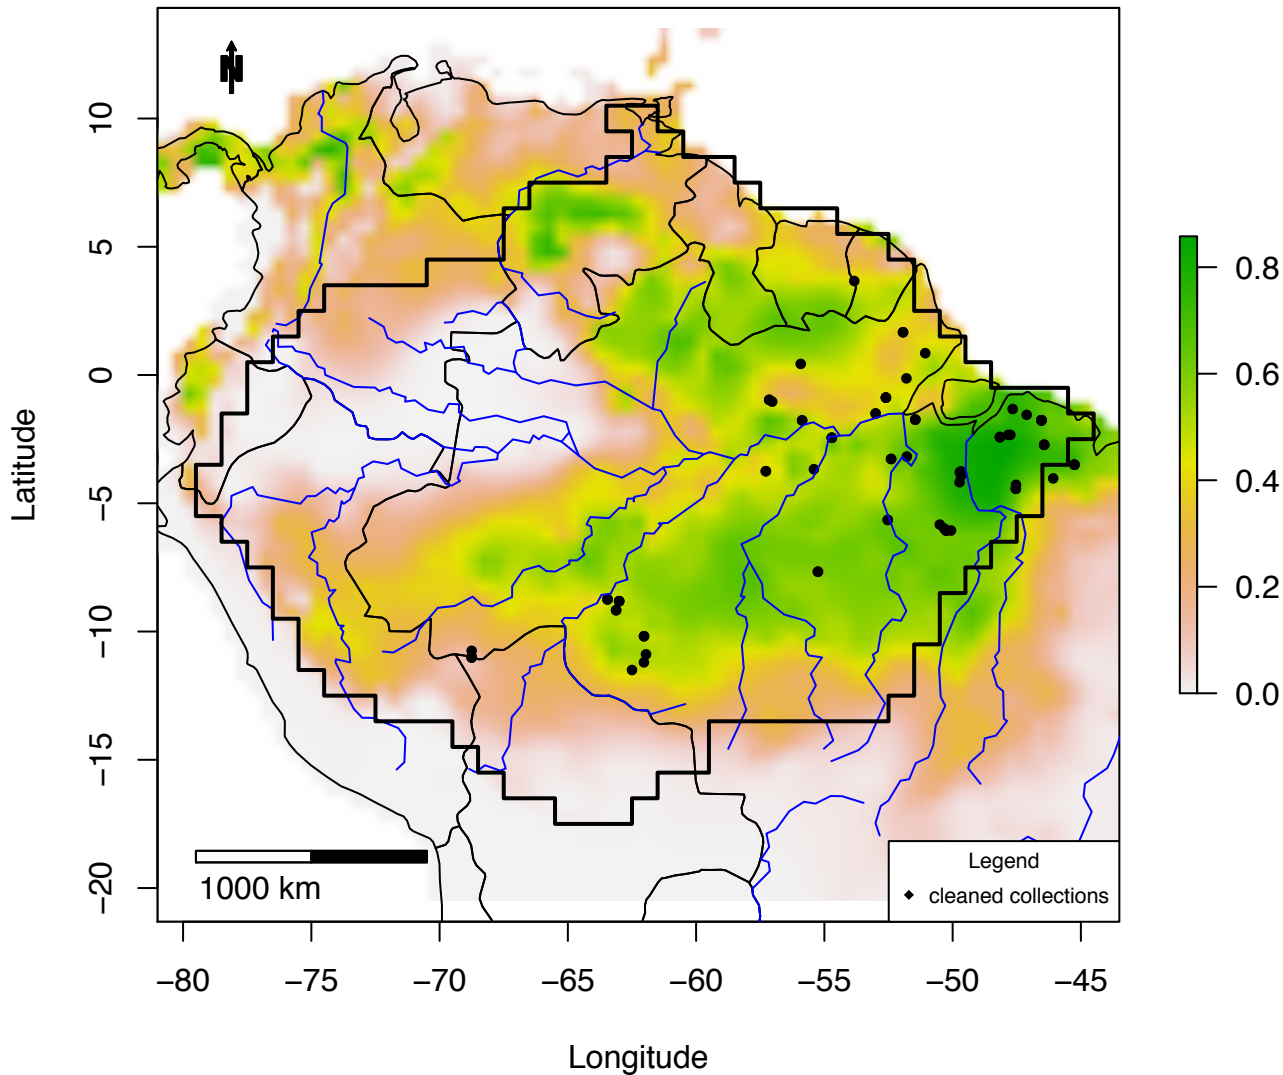

**Figure S3\_3C IDW map of *Amphiodon\_effusus*:**  
plots =0 – 0.24; IDW: 0 – 0.09

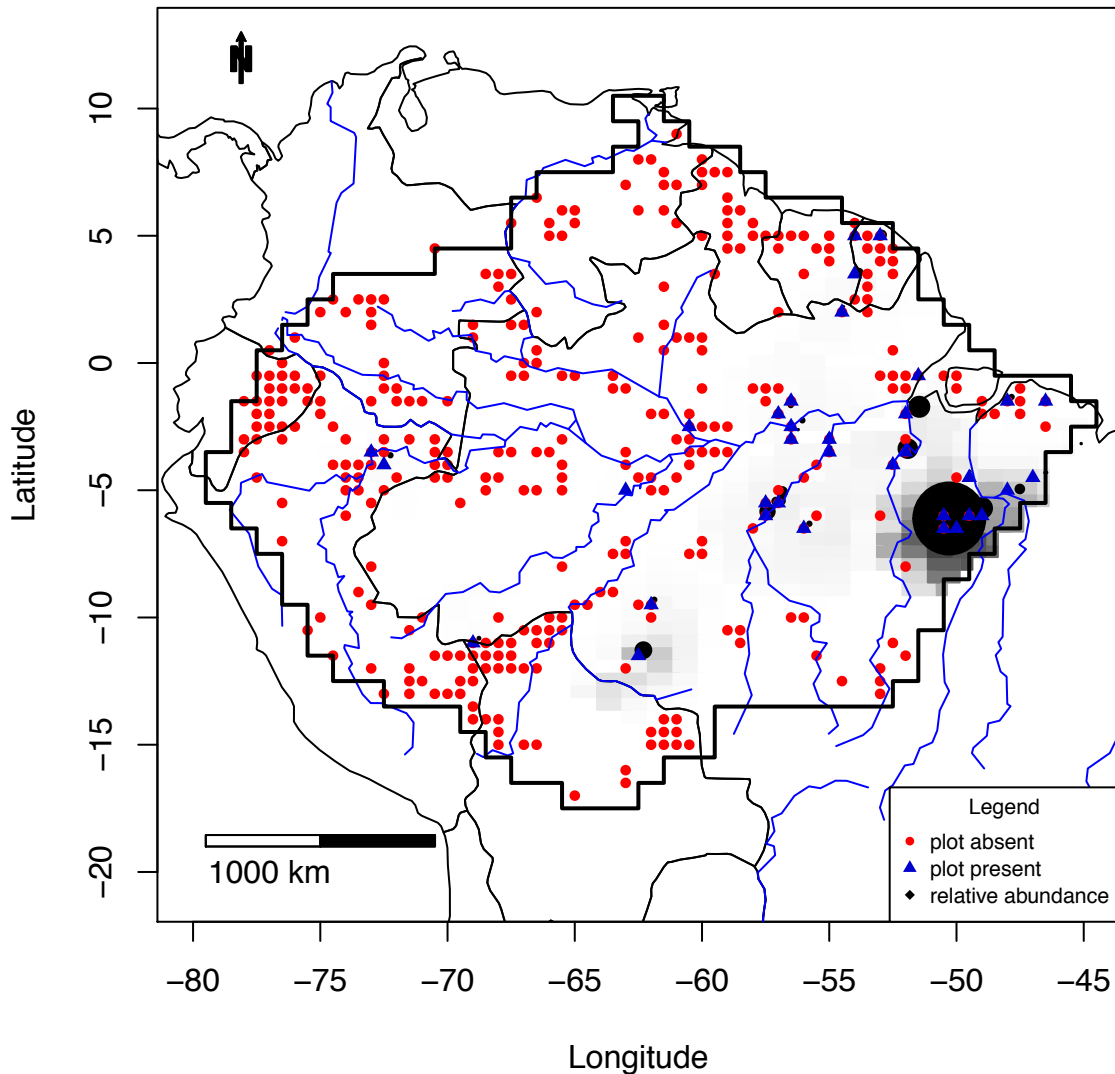

Figure S3\_4A Combined map of *Apeiba\_glabra*

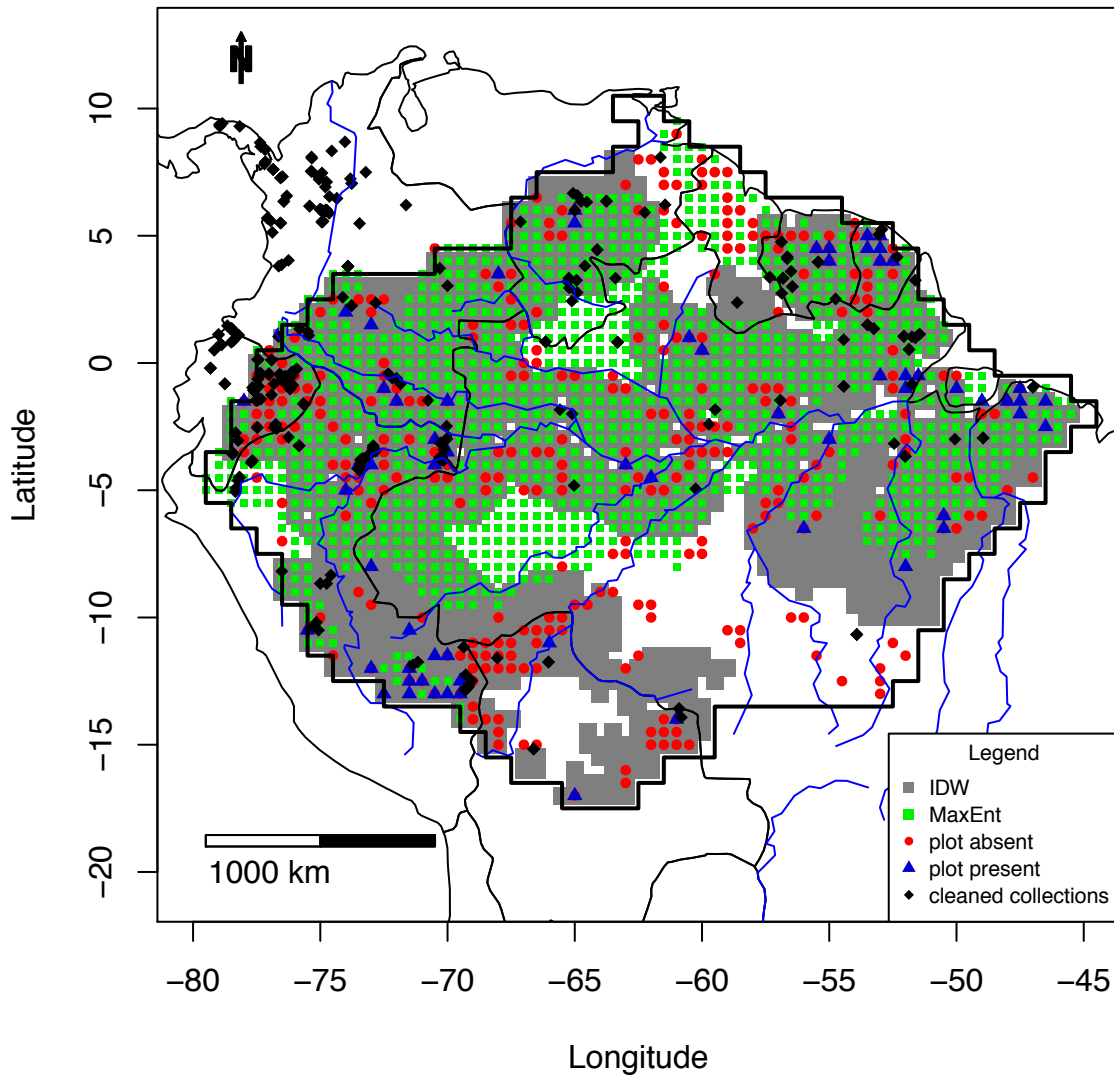

Figure S3\_4B MaxEnt map of *Apeiba\_glabra*

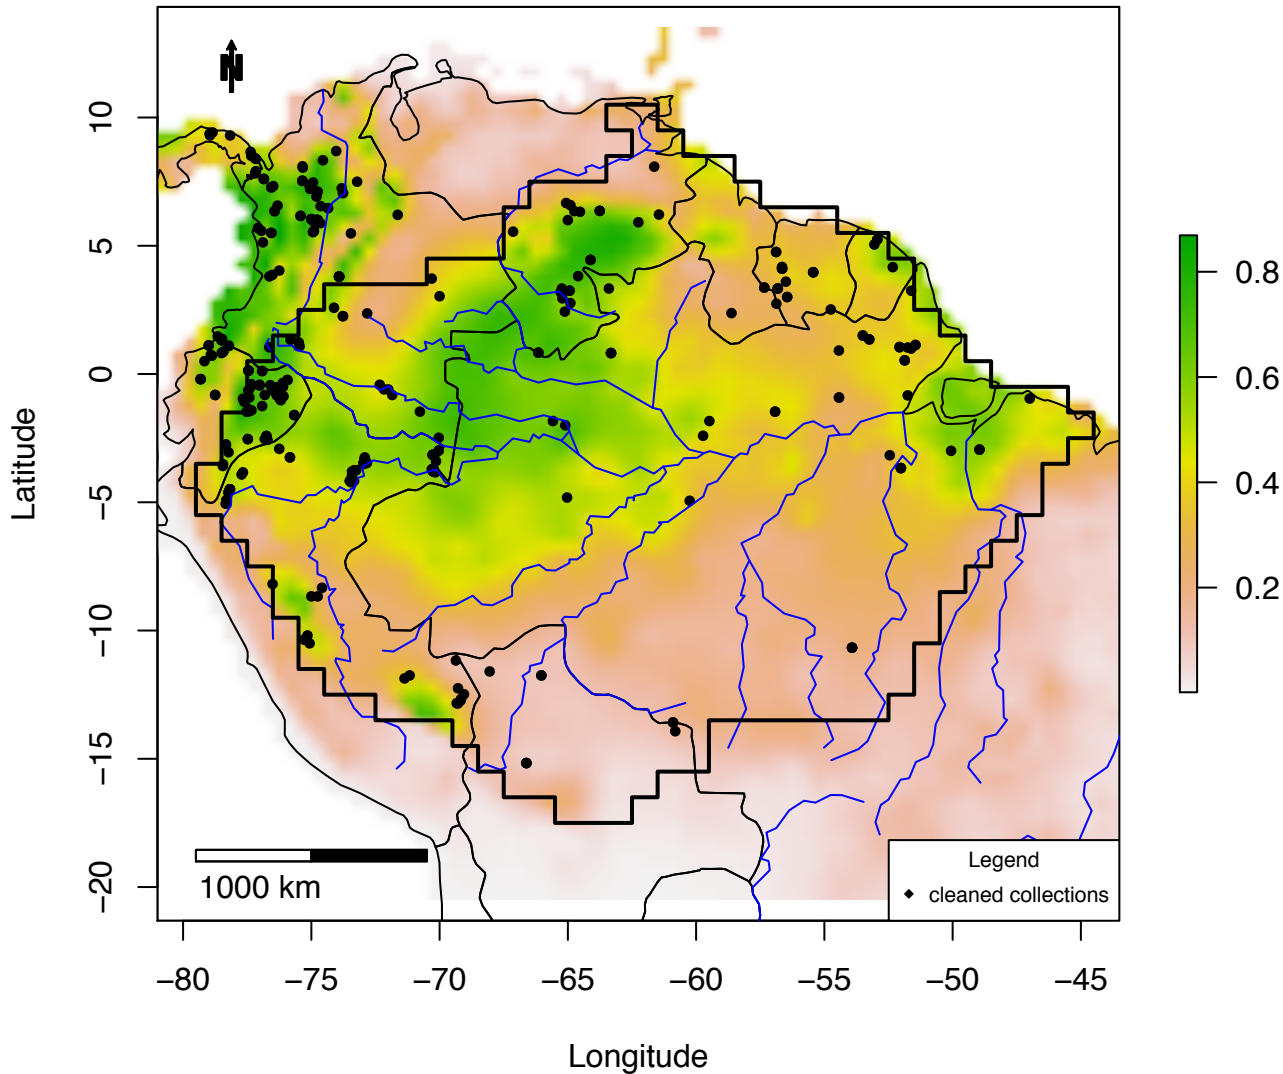

Figure S3\_4C IDW map of *Apeiba glabra*:  
plots =0 – 0.04; IDW: 0 – 0.03

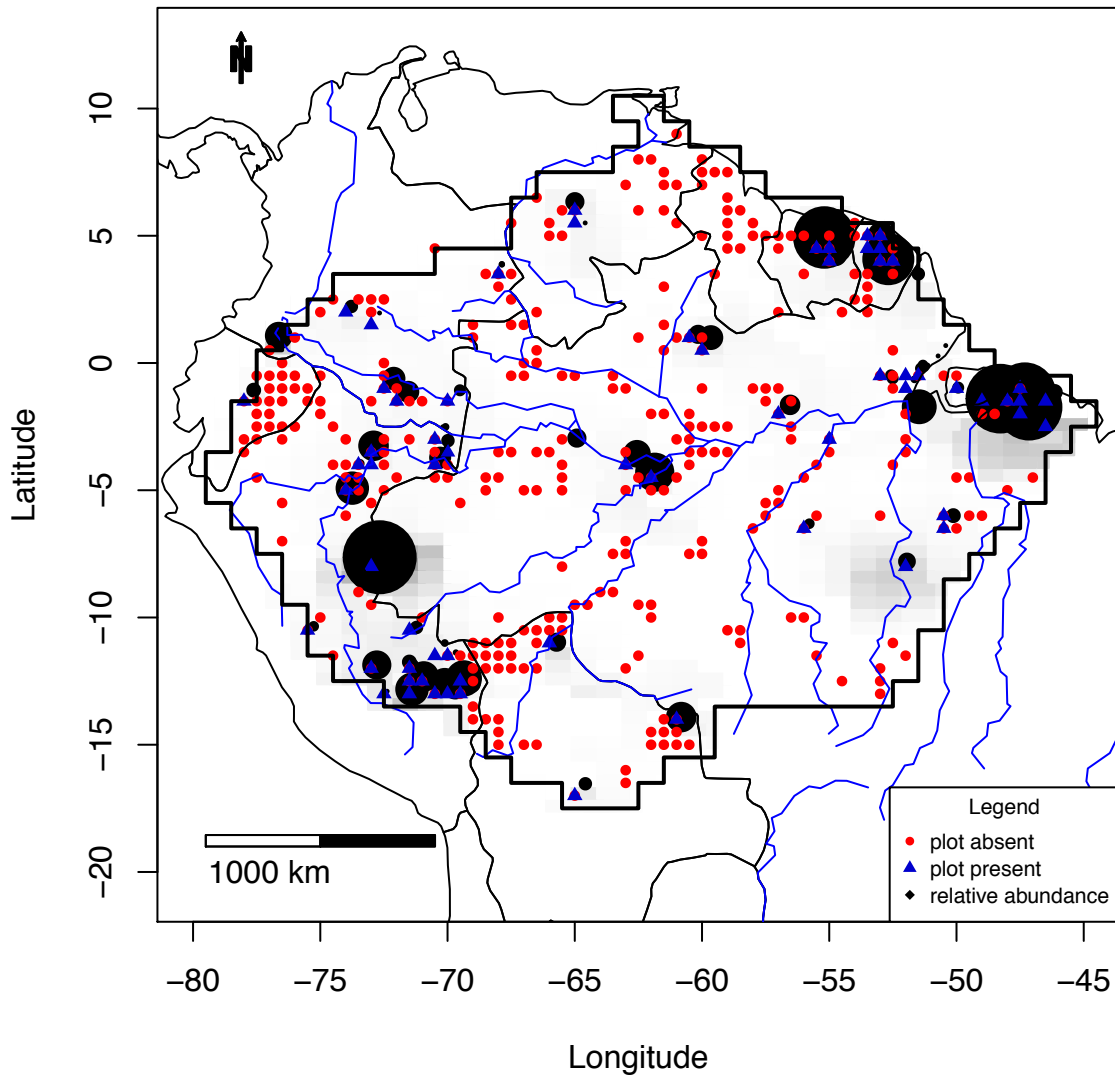

Figure S3\_5A Combined map of *Aspidosperma\_excelsum*

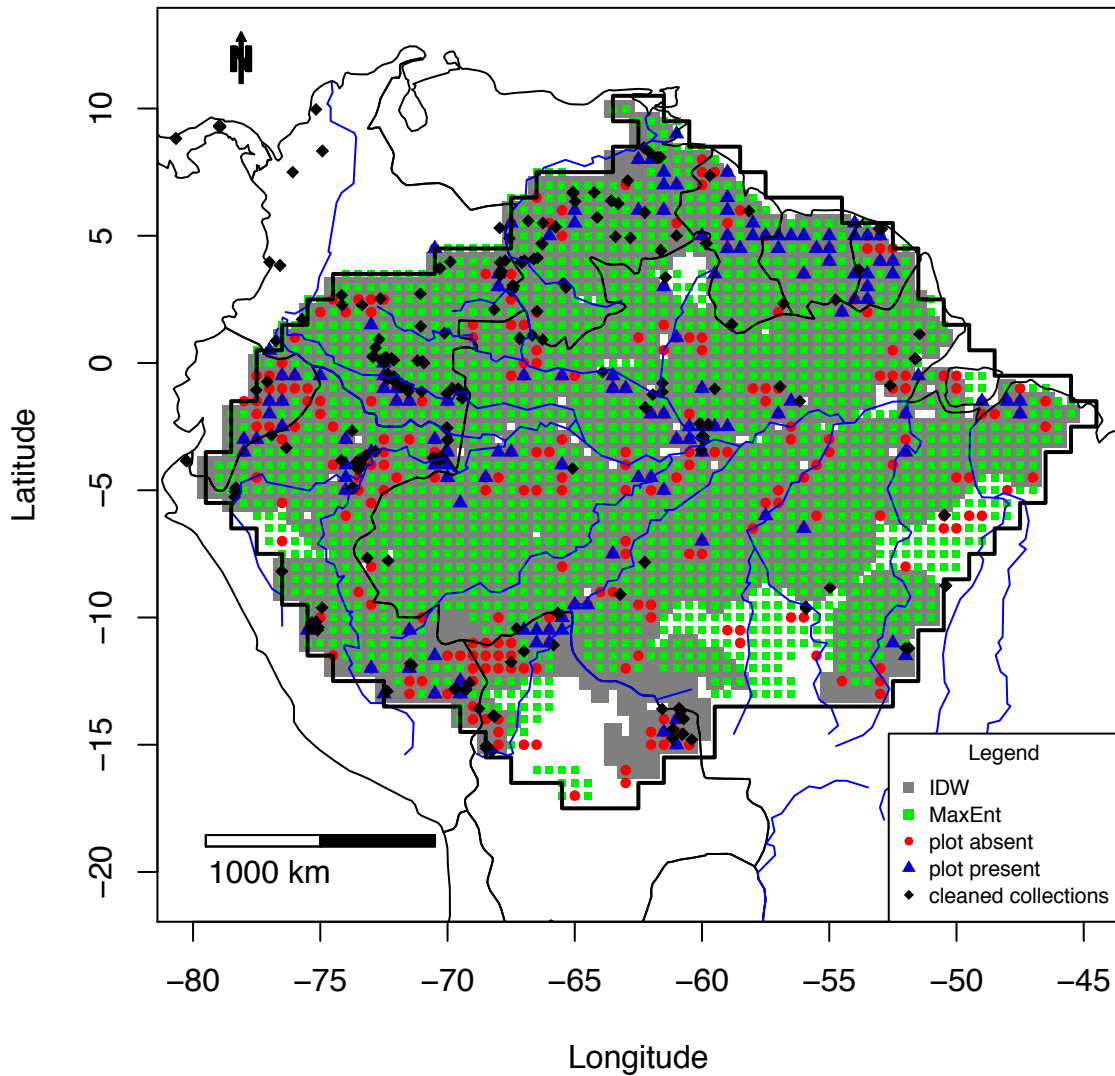

Figure S3\_5B MaxEnt map of *Aspidosperma\_excelsum*

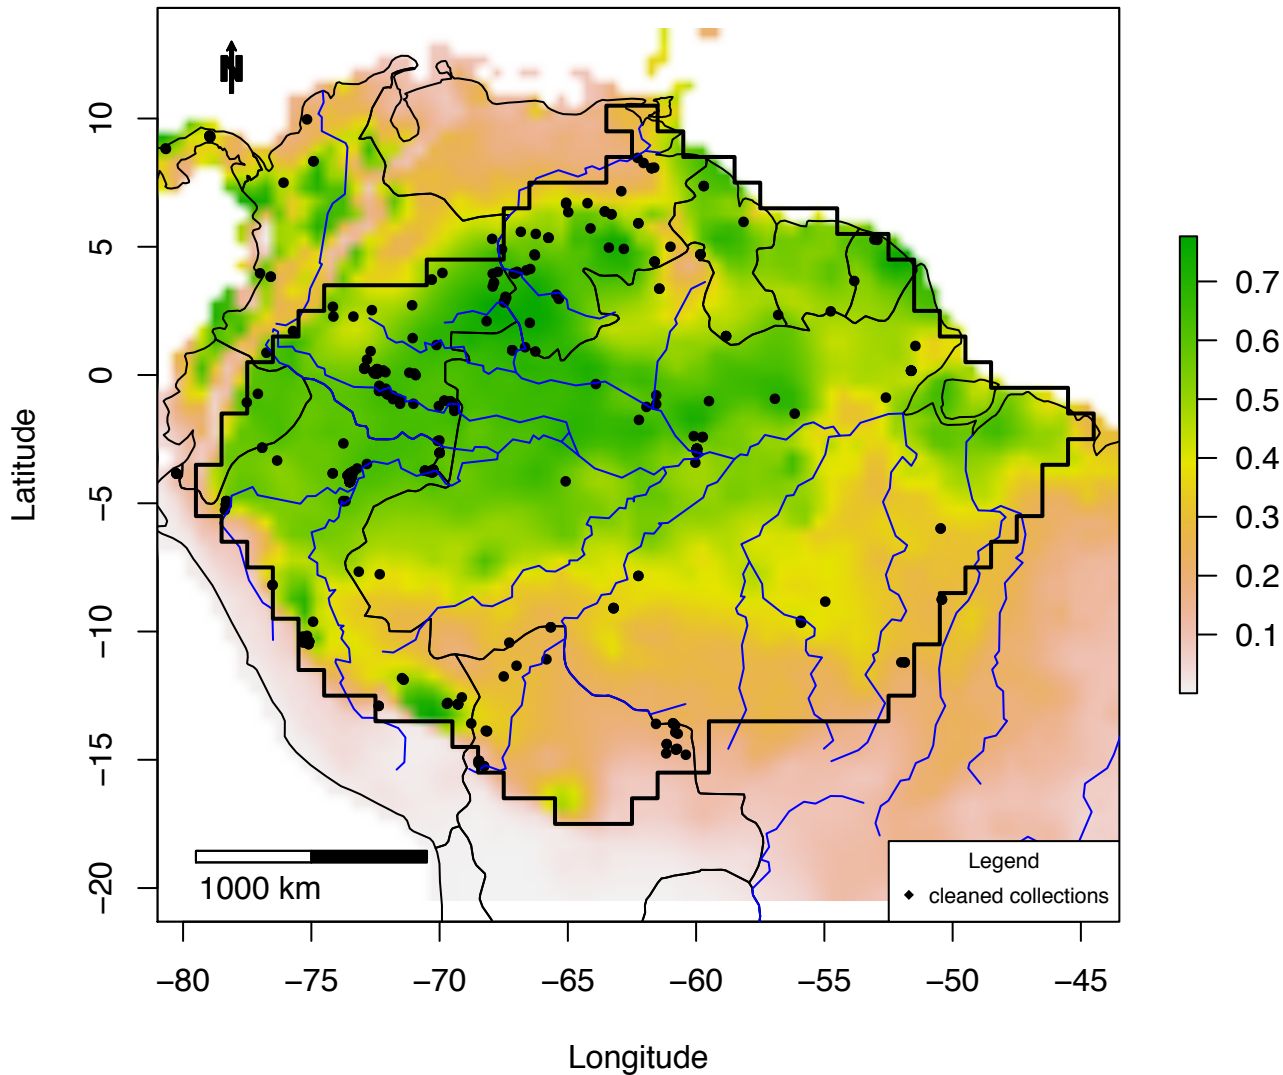

Figure S3\_5C IDW map of *Aspidosperma excelsum*:  
plots =0 – 0.28; IDW: 0 – 0.11

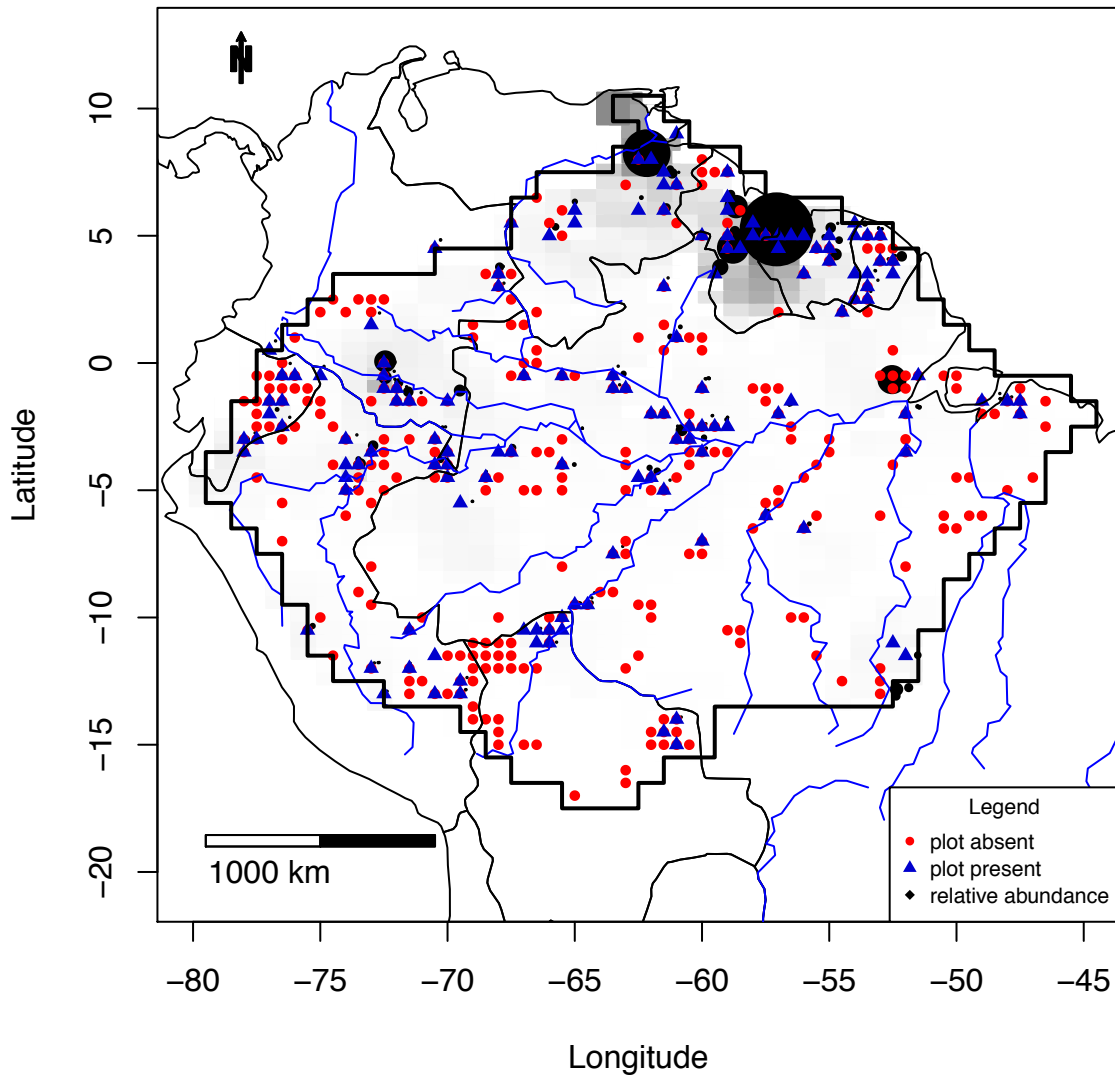



Figure S3\_6A Combined map of *Astrocaryum aculeatum*

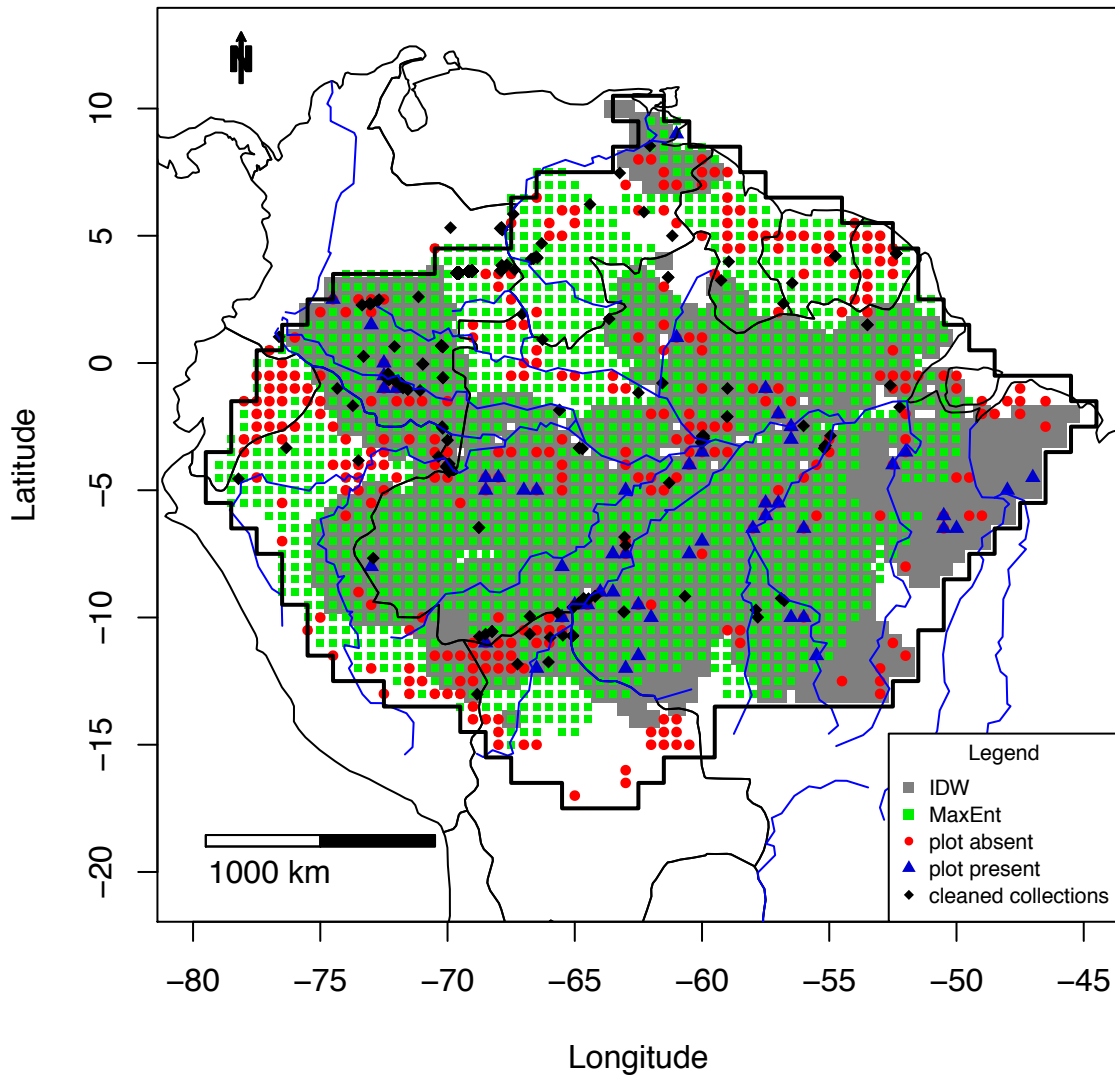

Figure S3\_6B MaxEnt map of *Astrocaryum aculeatum*

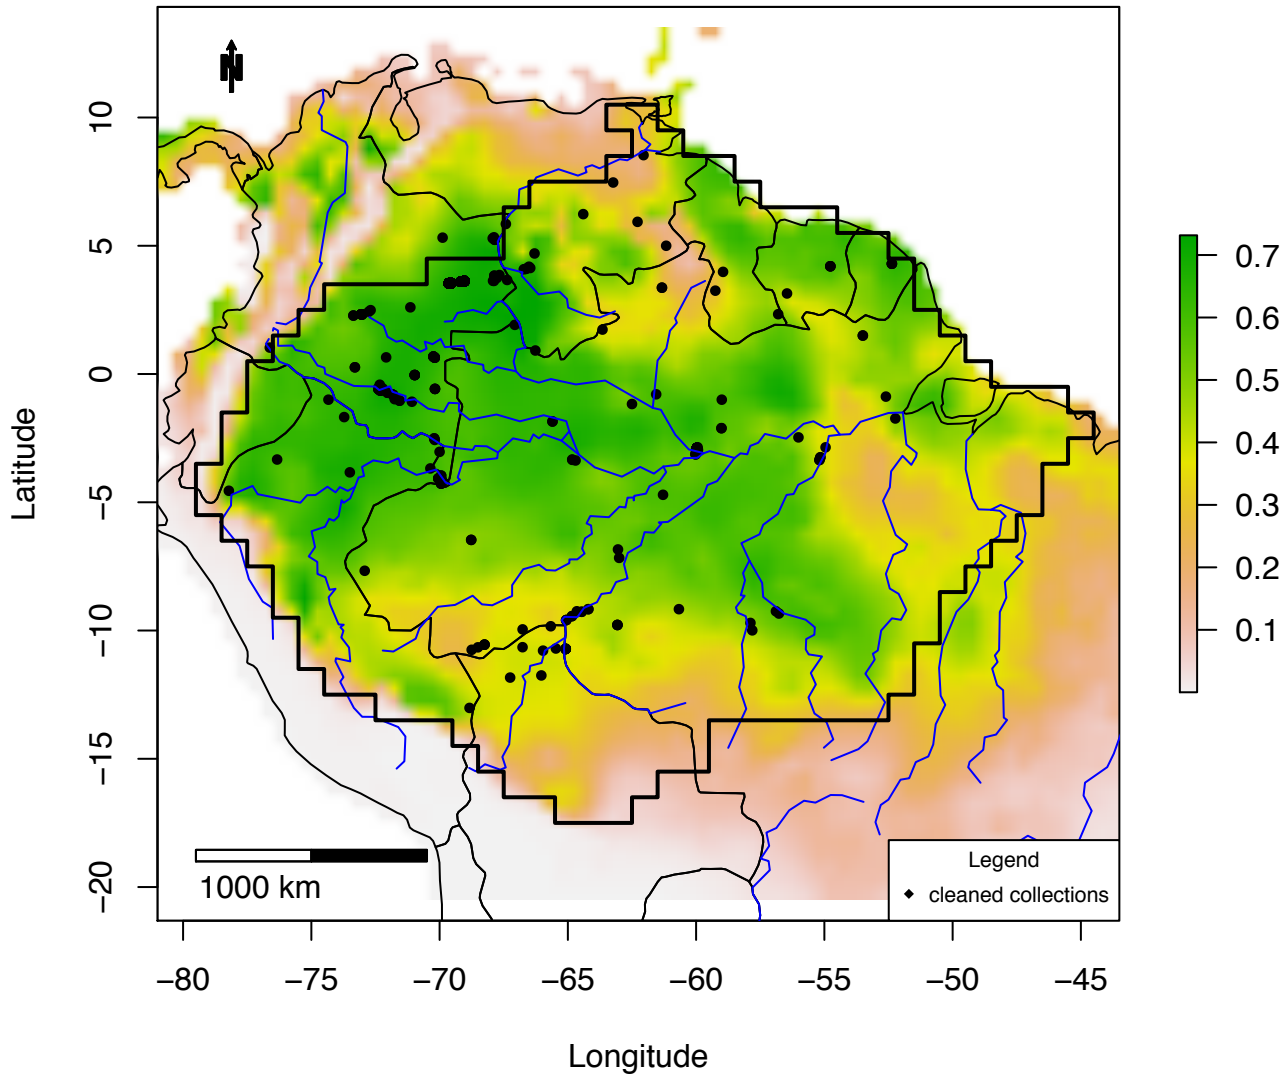

Figure S3\_6C IDW map of *Astrocaryum aculeatum*:  
plots =0 – 0.15; IDW: 0 – 0.04

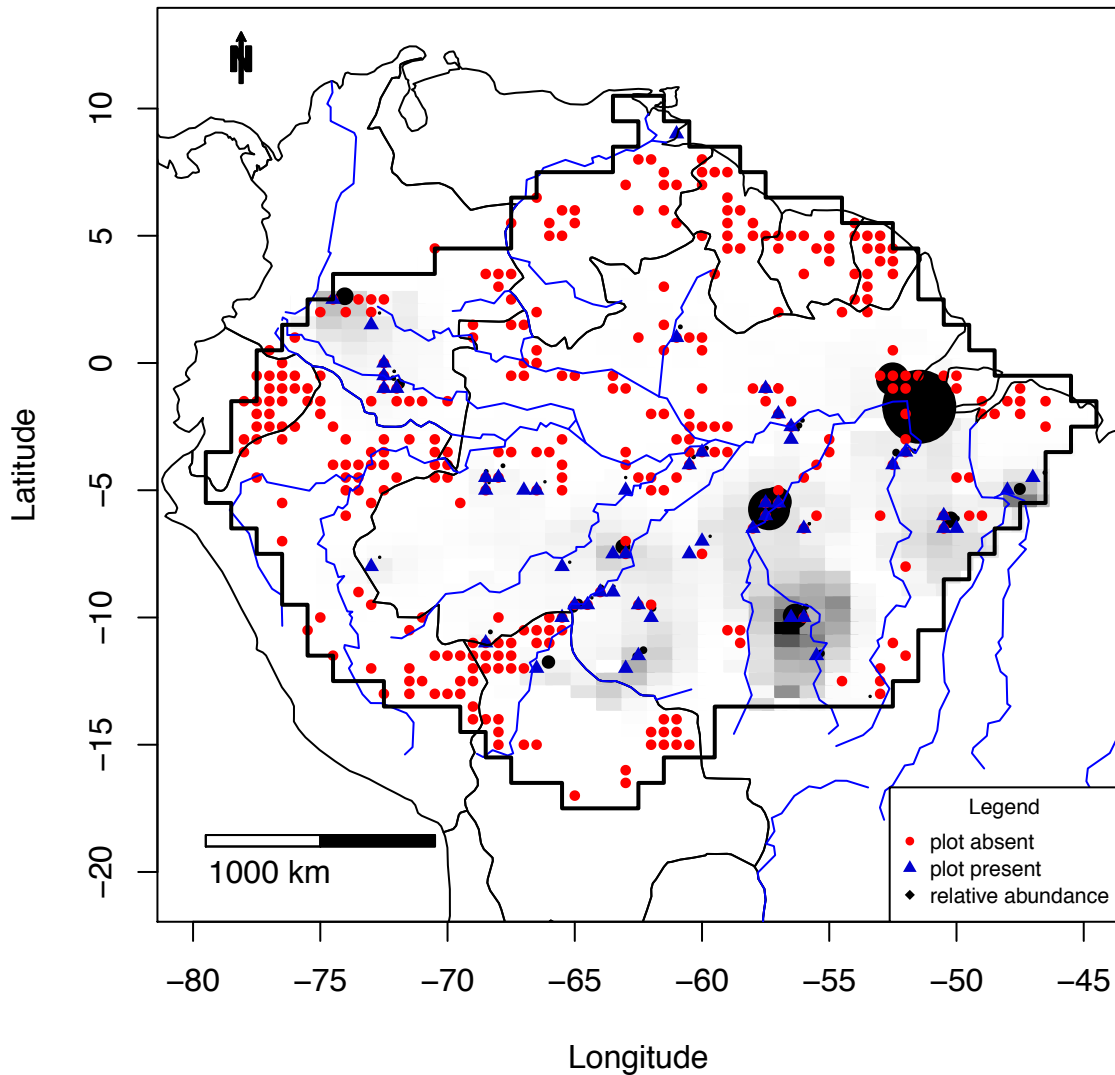

Figure S3\_7A Combined map of *Astrocaryum\_murumuru*

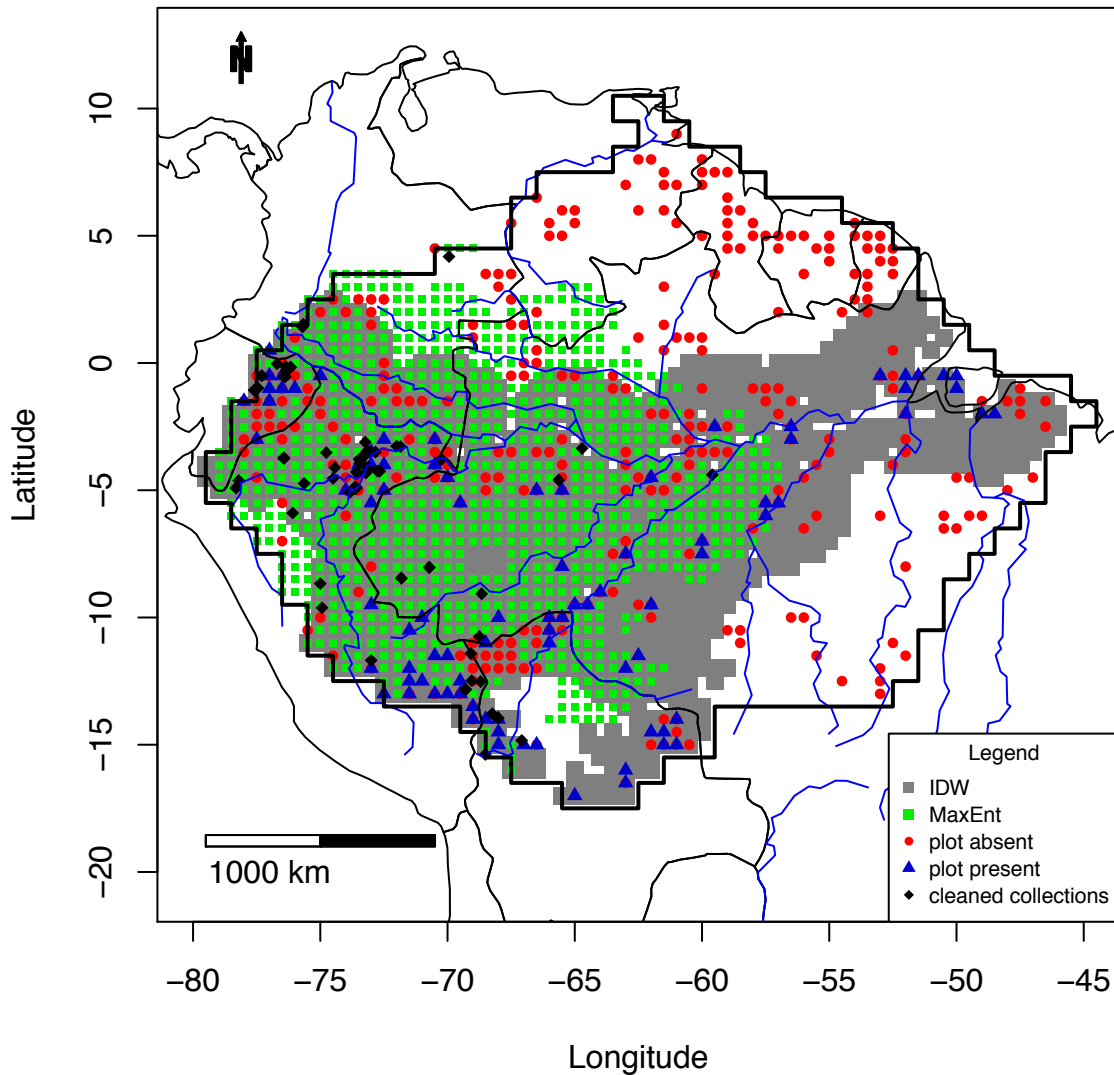

Figure S3\_7B MaxEnt map of *Astrocaryum\_murumuru*

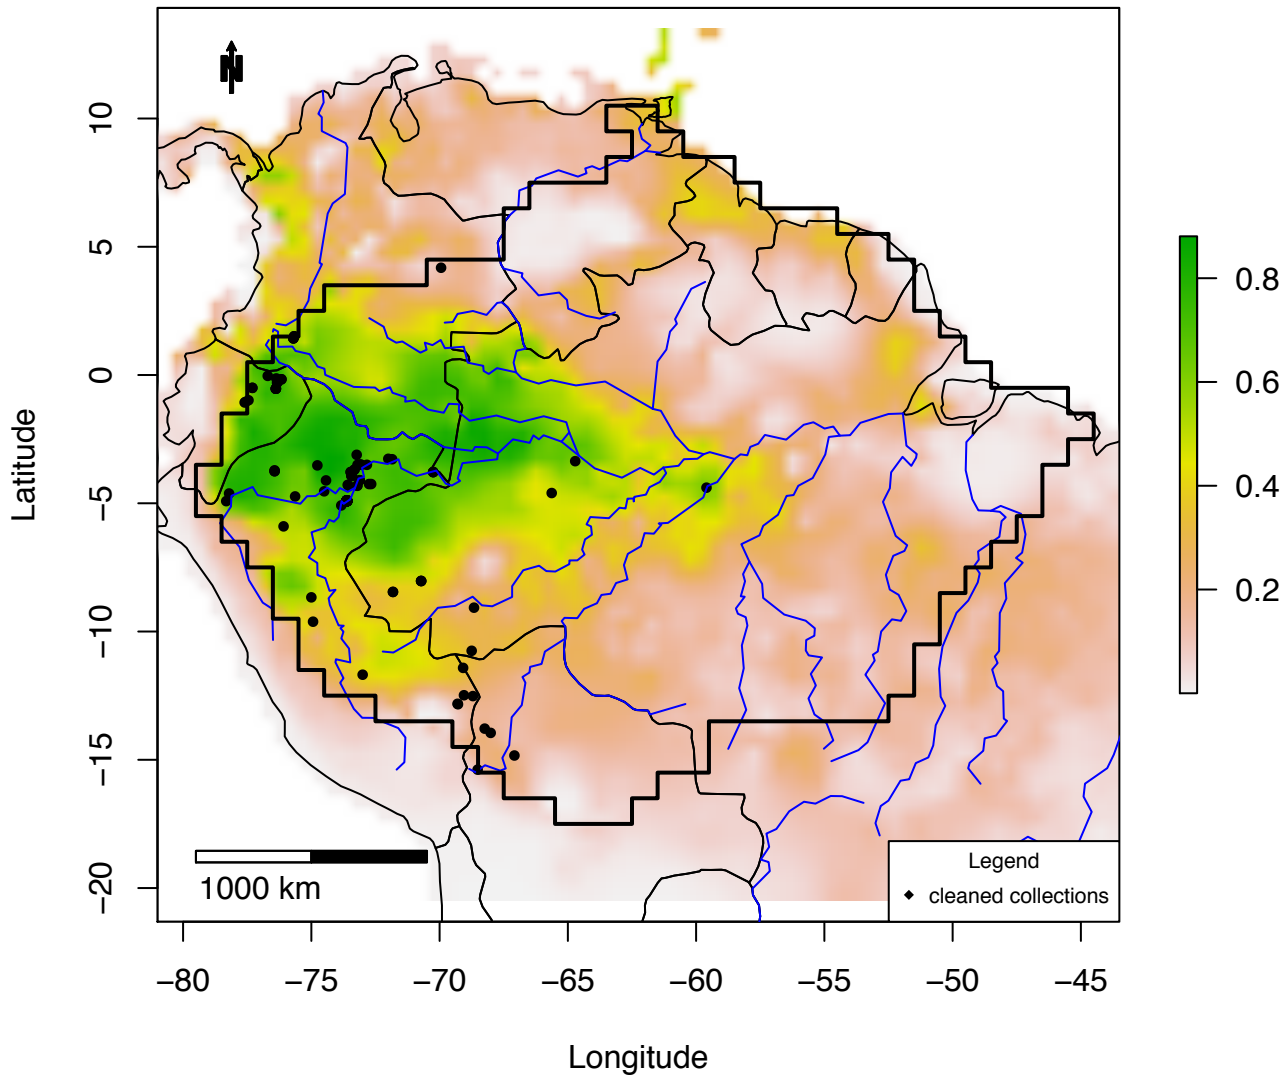

Figure S3\_7C IDW map of *Astrocaryum murumuru*:  
plots =0 – 0.52; IDW: 0 – 0.25

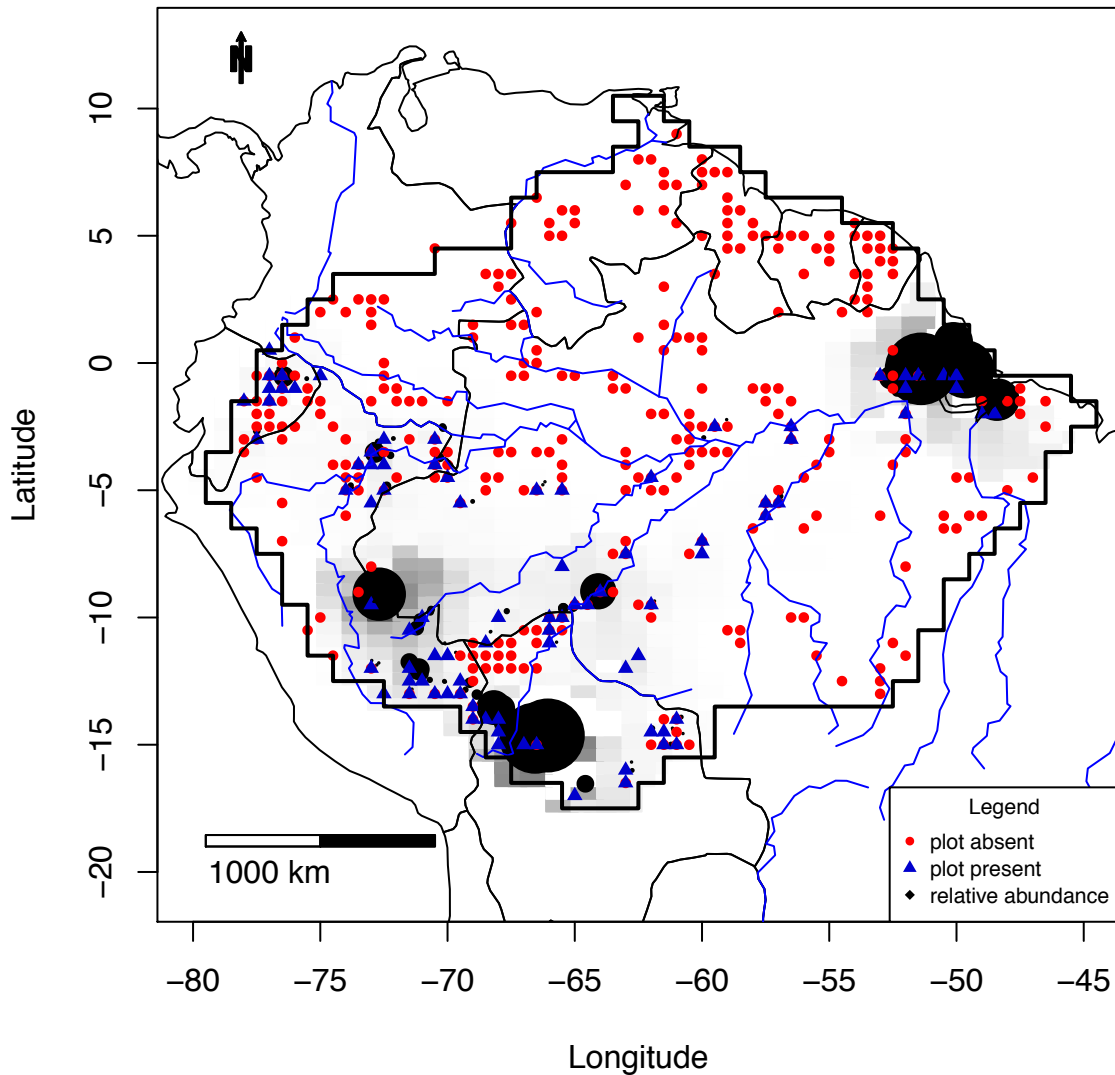

Figure S3\_8A Combined map of *Attalea\_butyracea*

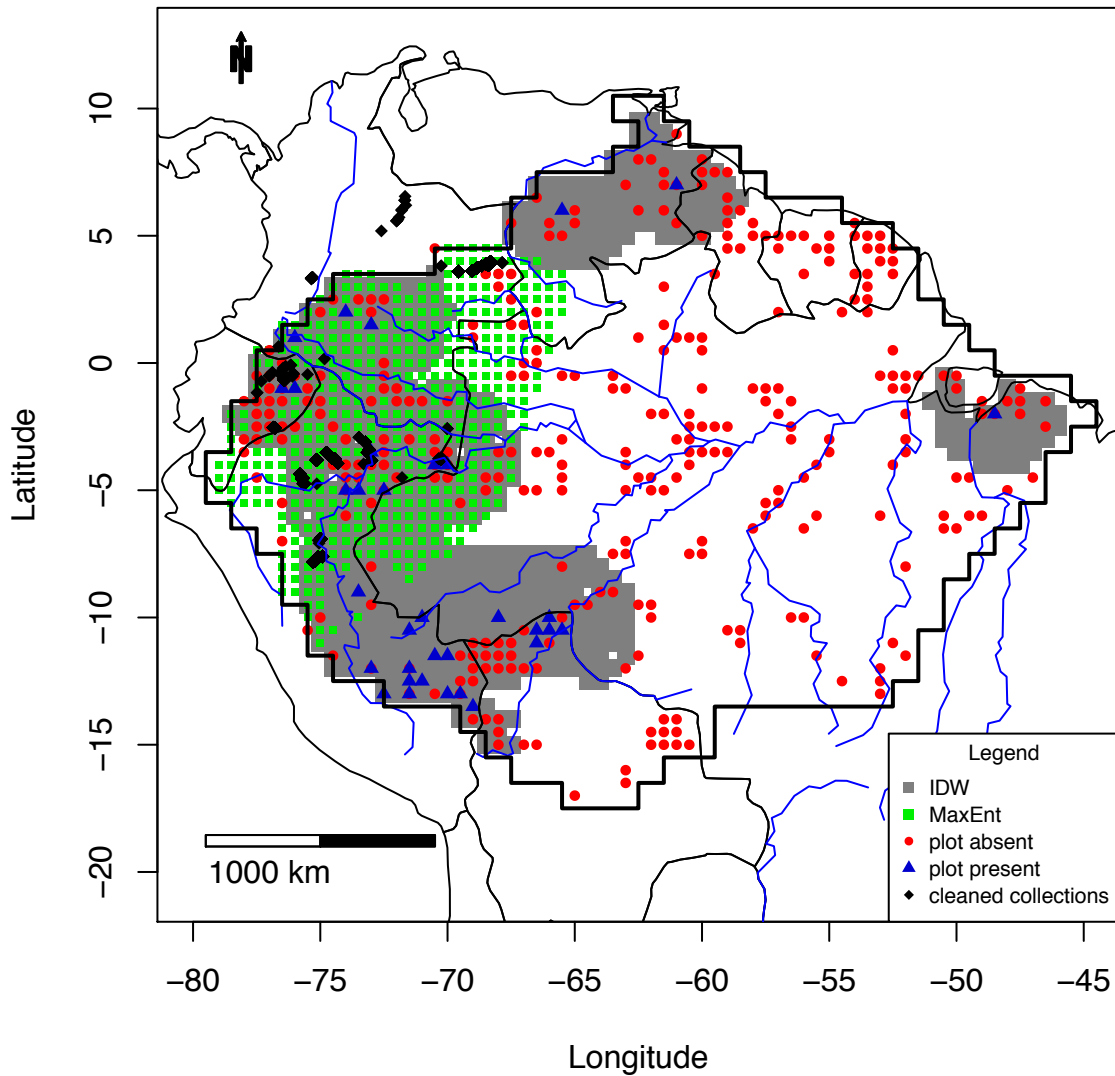

Figure S3\_8B MaxEnt map of *Attalea\_butyracea*

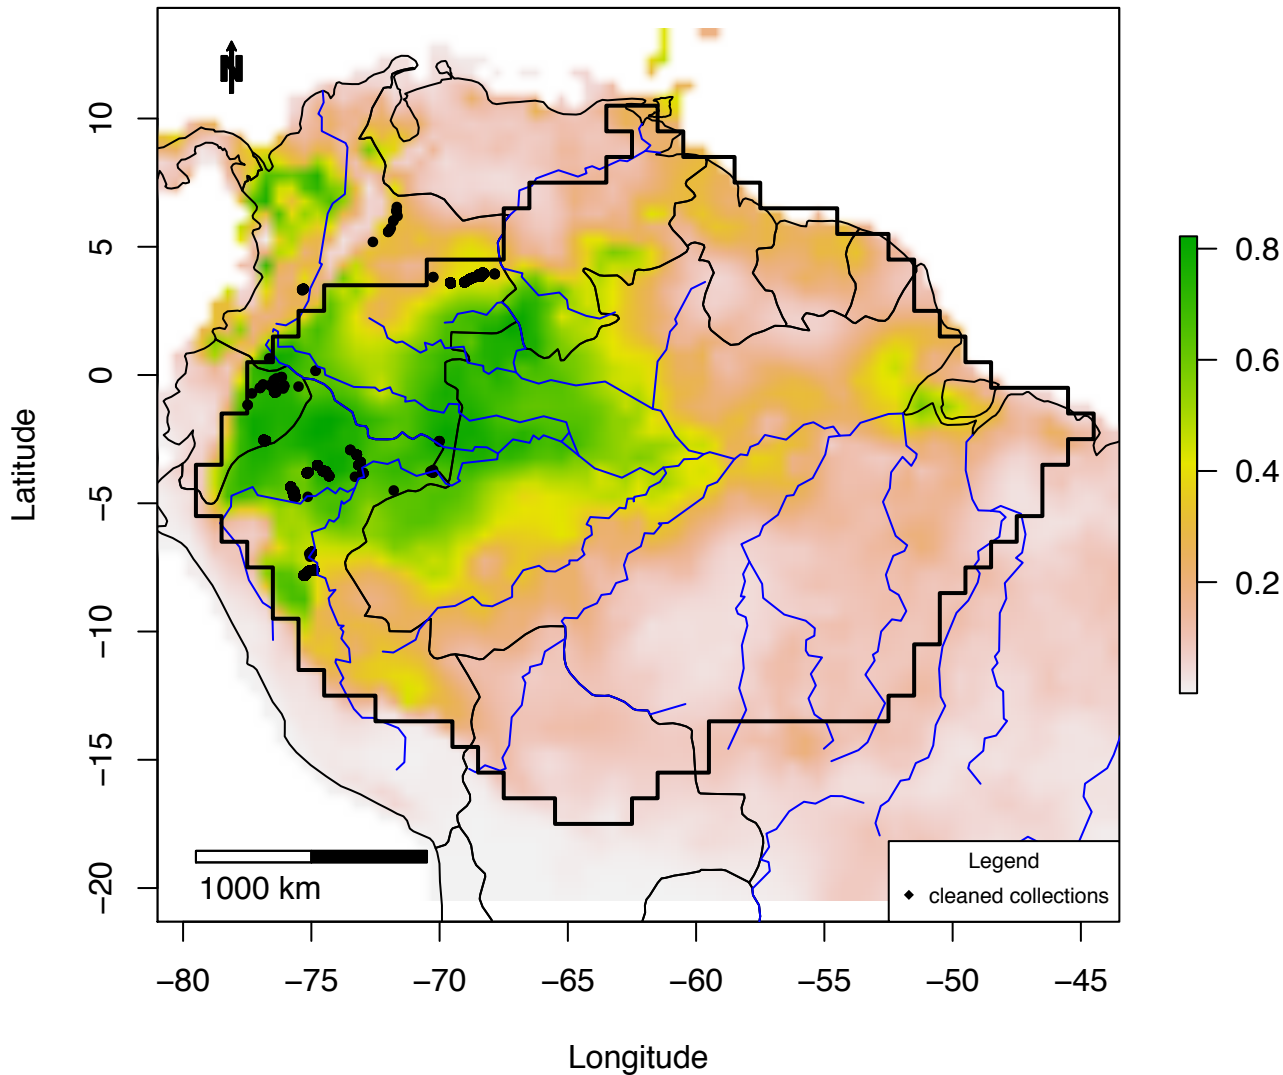



Figure S3\_8C IDW map of *Attalea butyracea*:  
plots = 0 – 0.33; IDW: 0 – 0.19

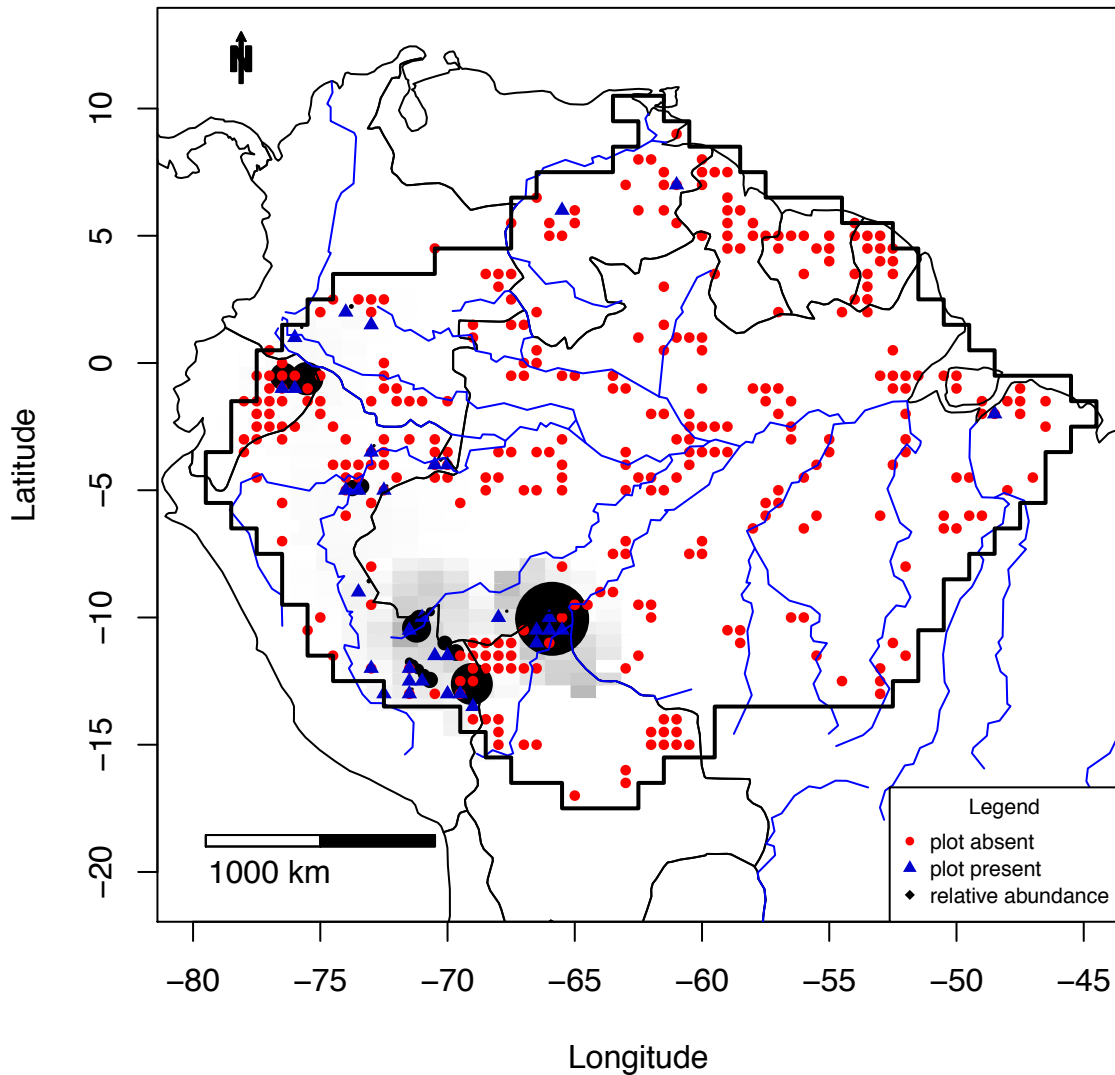

Figure S3\_9A Combined map of *Attalea\_maripa*

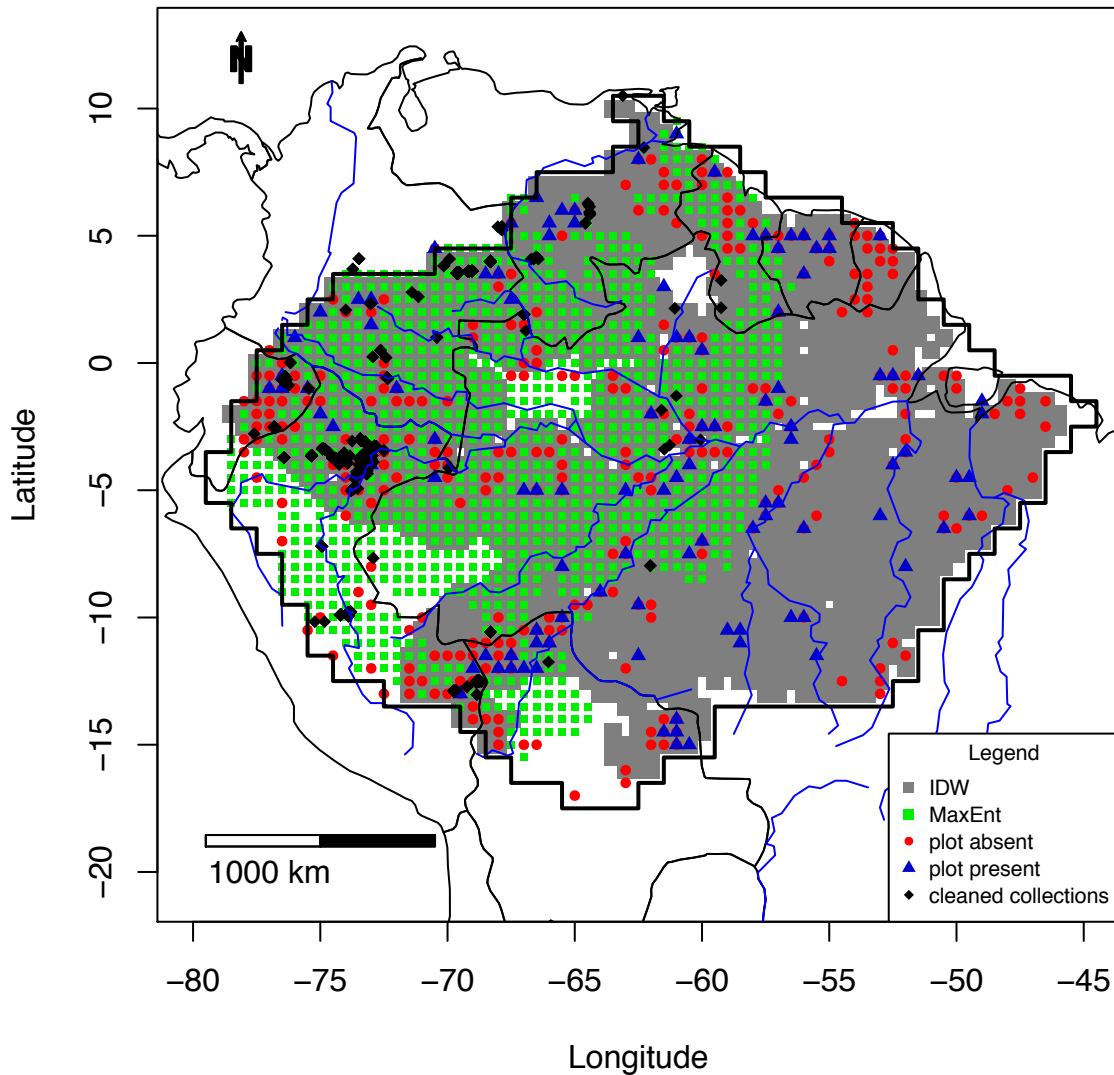

Figure S3\_9B MaxEnt map of *Attalea\_maripa*

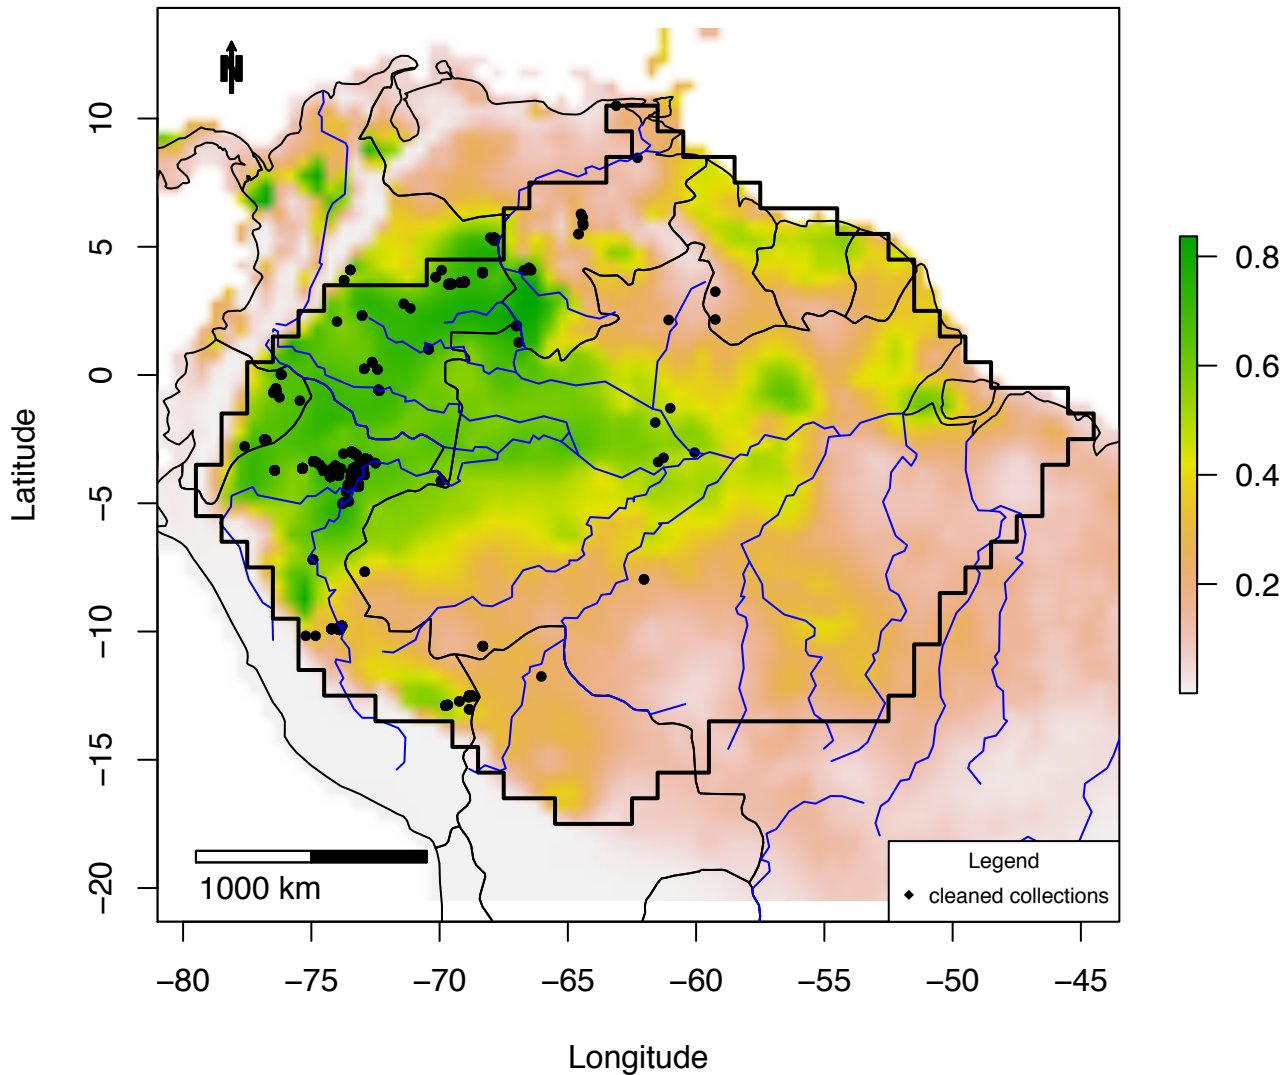

**Figure S3\_9C IDW map of *Attalea\_maripa*:**  
**plots =0 – 0.13; IDW: 0 – 0.05**

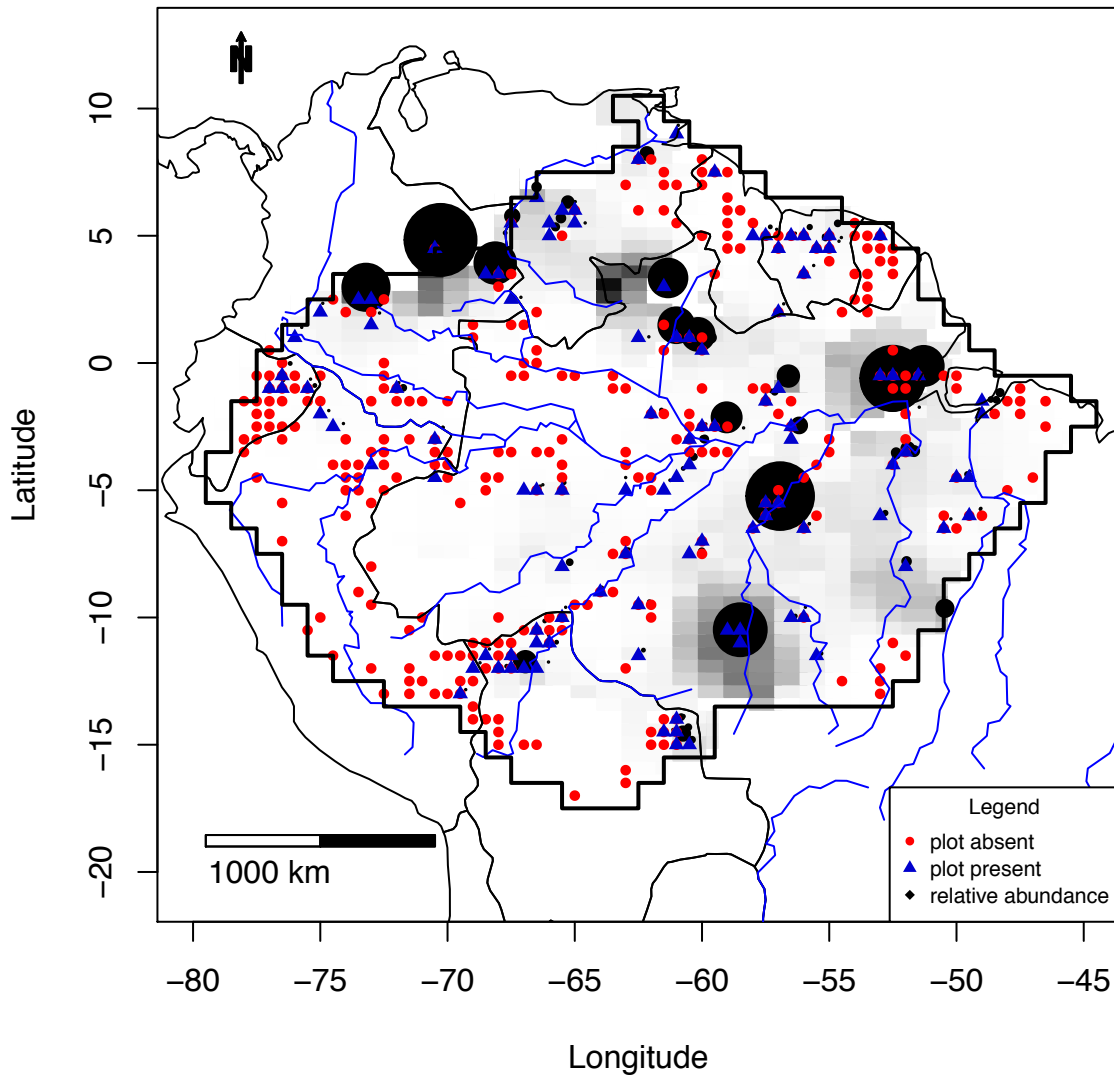

Figure S3\_10A Combined map of *Attalea phalerata*

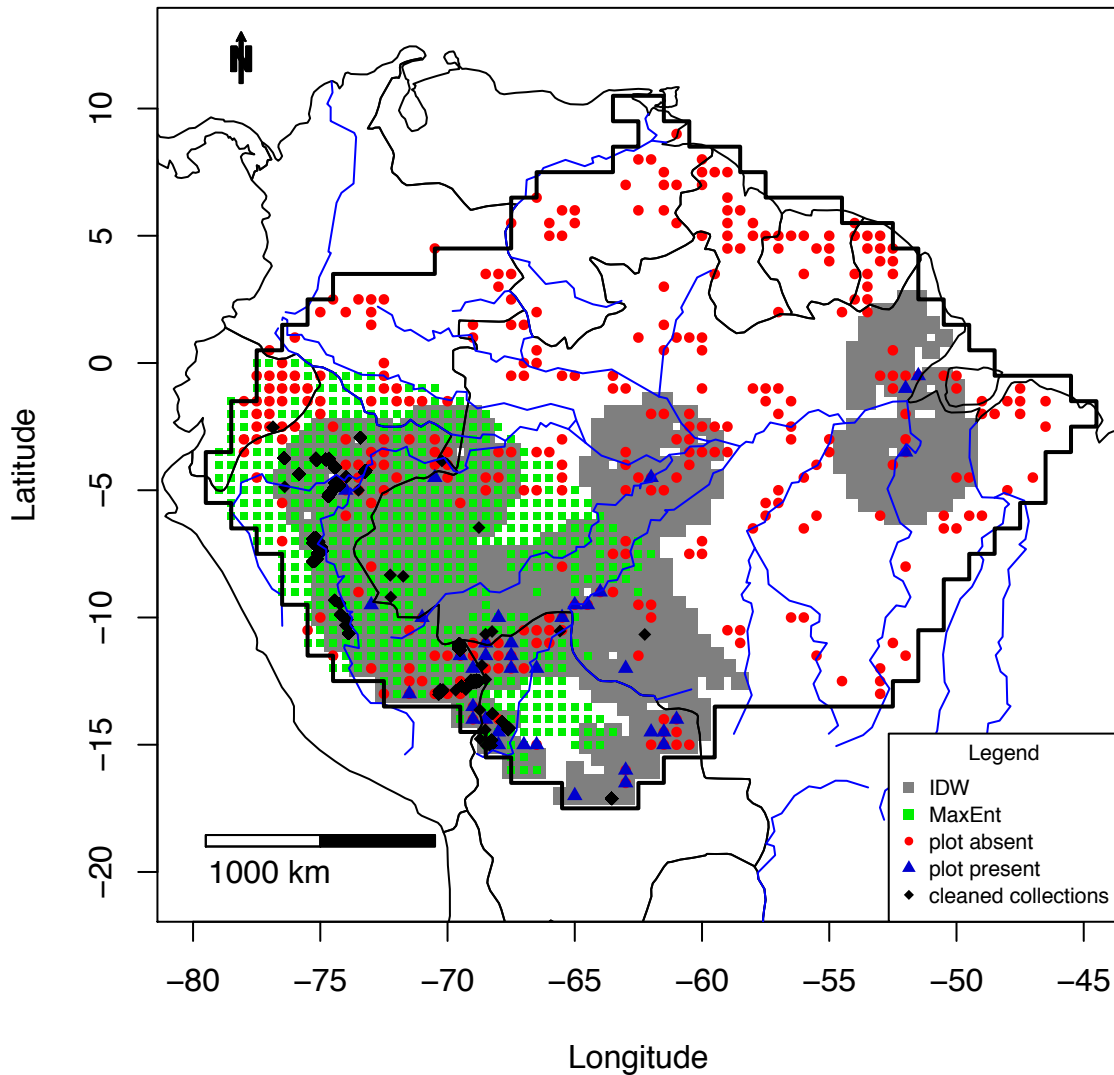

Figure S3\_10B MaxEnt map of *Attalea phalerata*

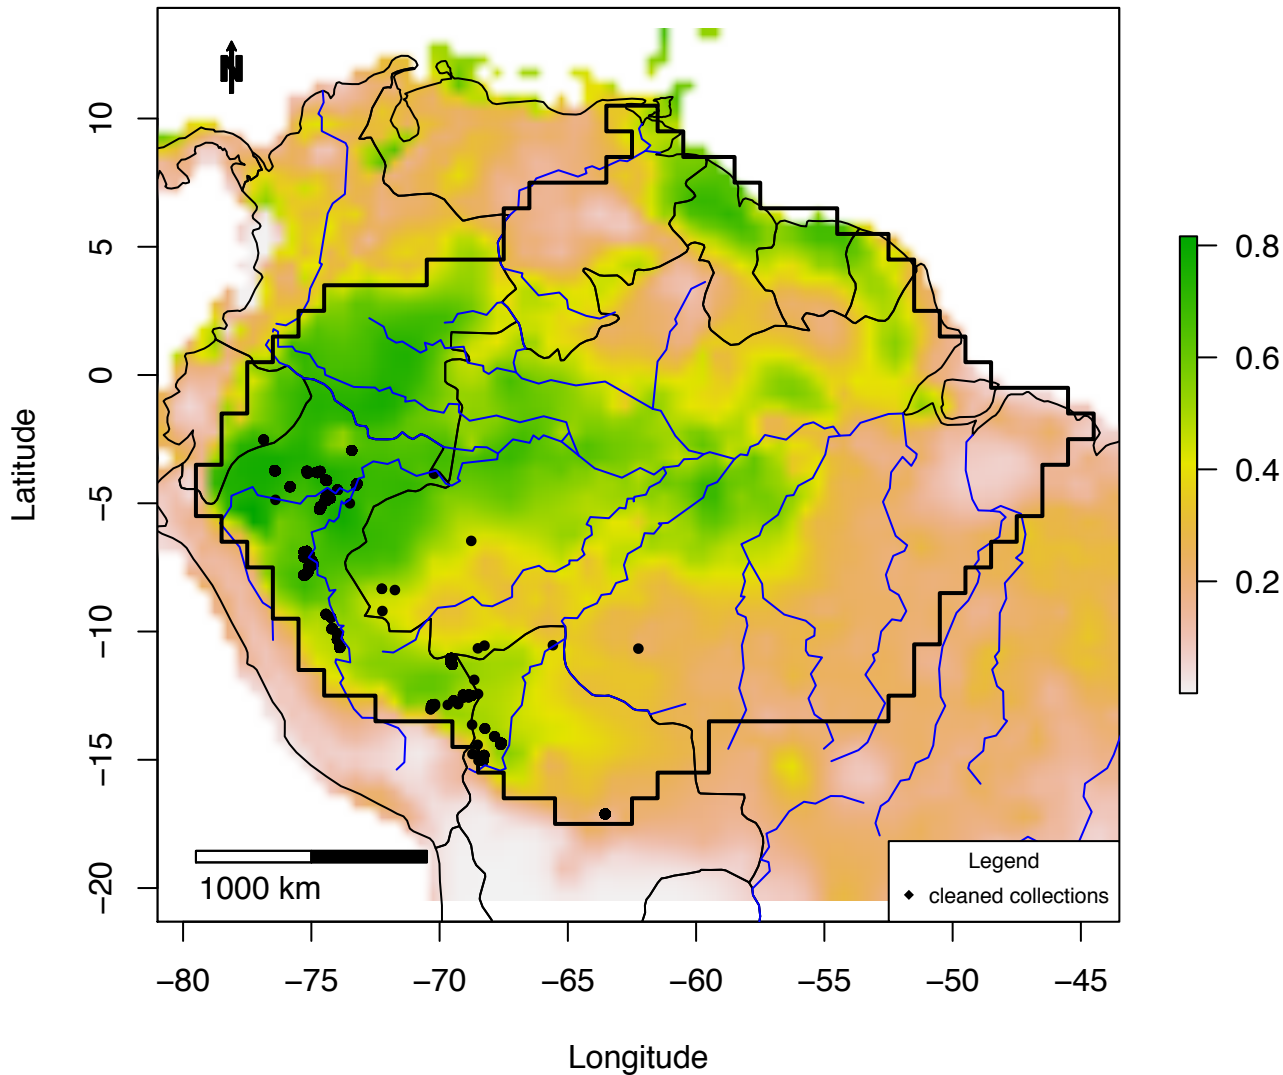

Figure S3\_10C IDW map of *Attalea phalerata*:  
plots =0 – 0.45; IDW: 0 – 0.18

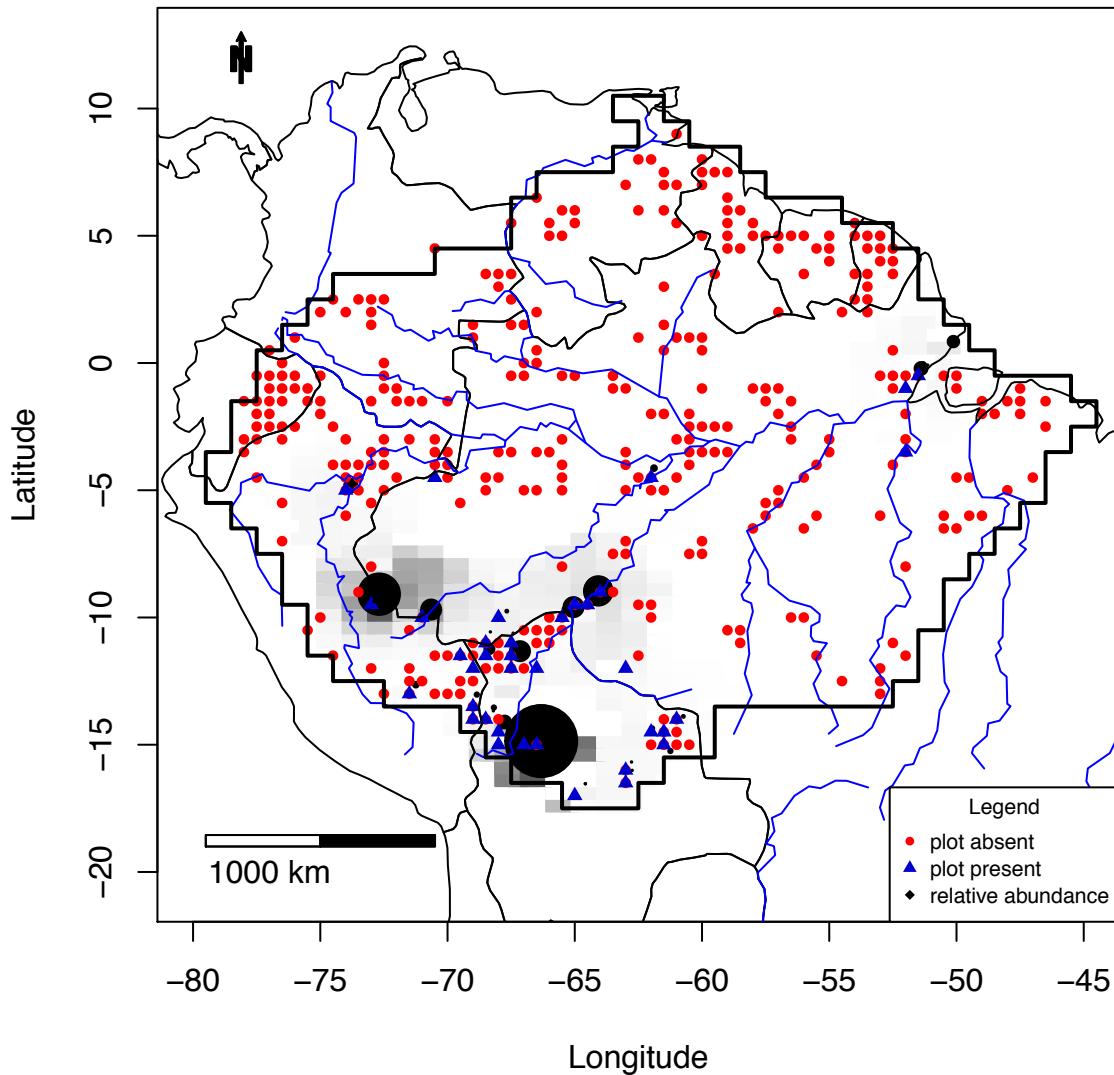

Figure S3\_11A Combined map of *Attalea speciosa*

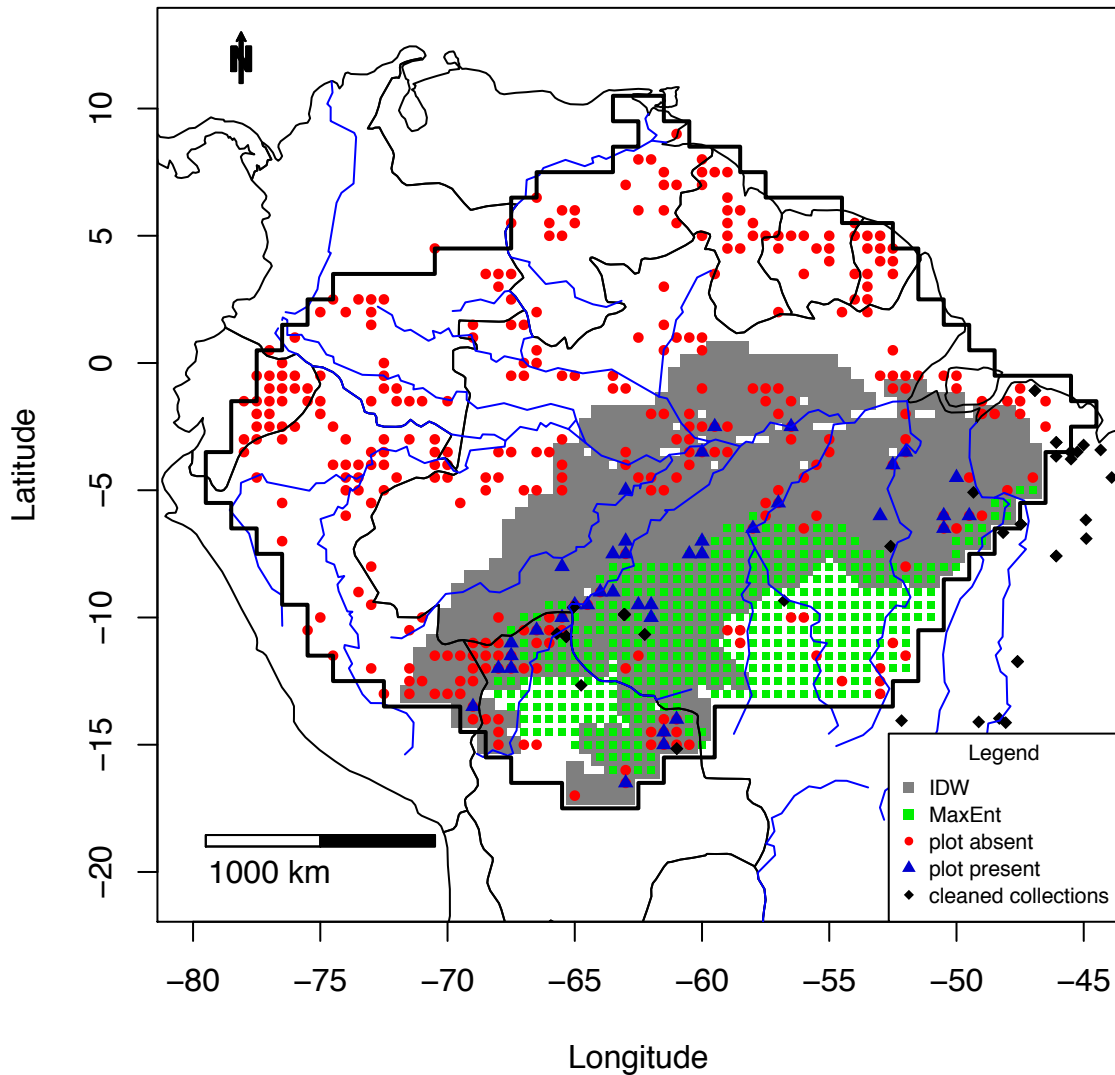



Figure S3\_11B MaxEnt map of *Attalea speciosa*

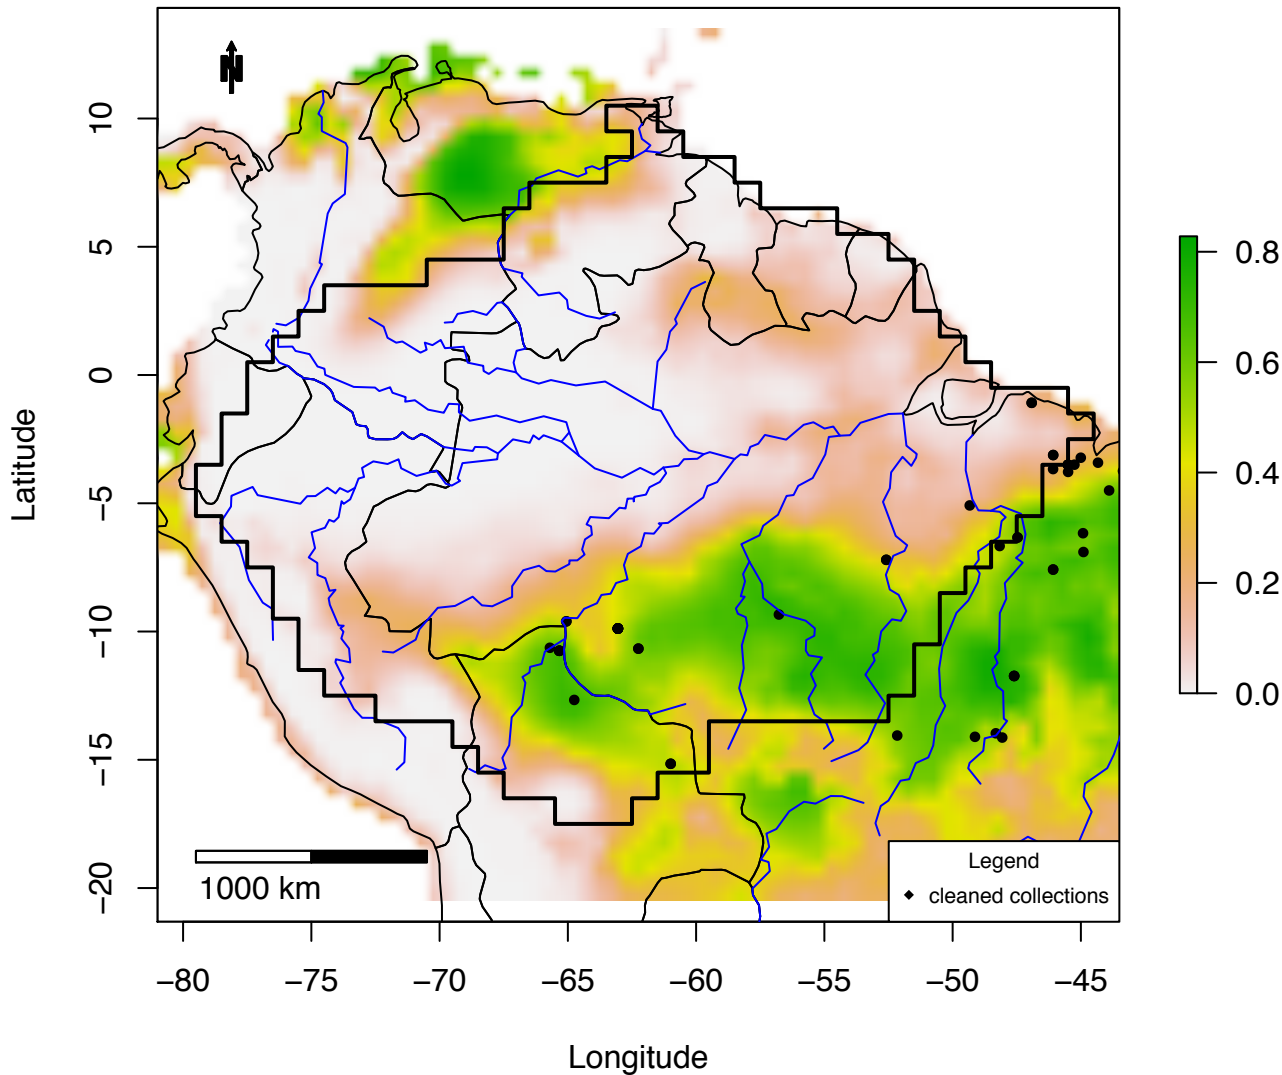

Figure S3\_11C IDW map of *Attalea speciosa*:  
plots =0 – 0.55; IDW: 0 – 0.09

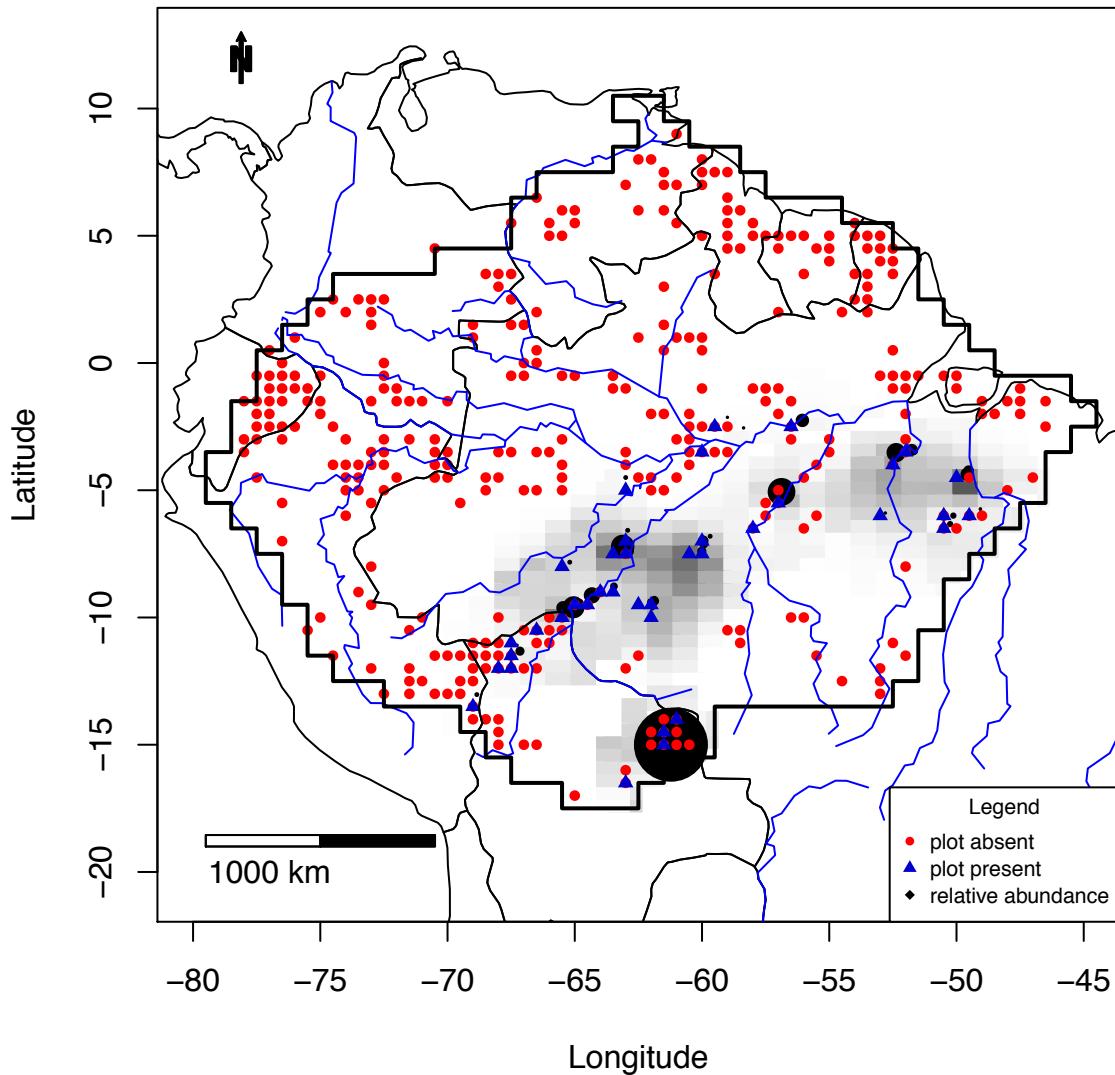

Figure S3\_12A Combined map of *Bertholletia excelsa*

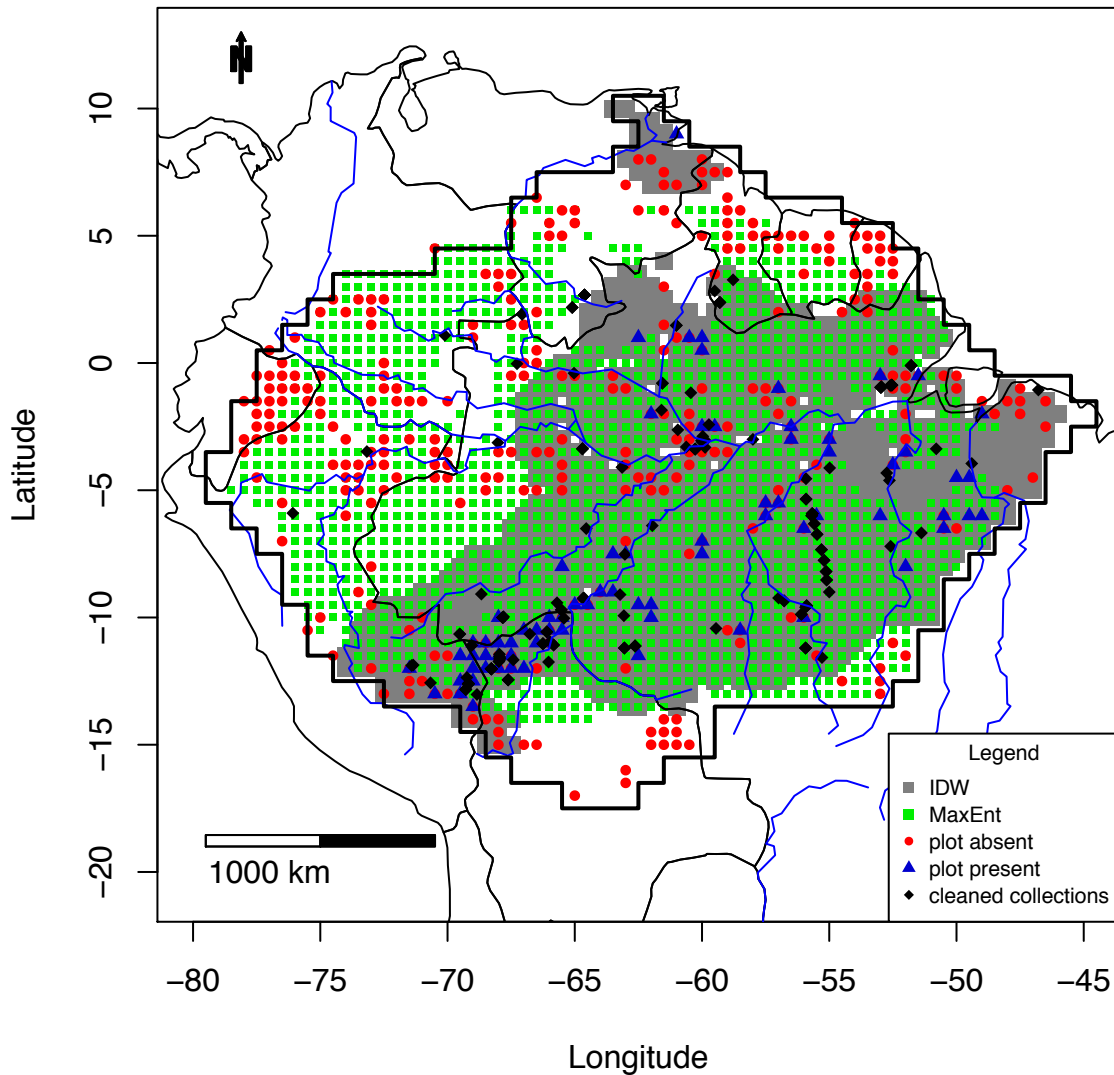

Figure S3\_12B MaxEnt map of *Bertholletia excelsa*

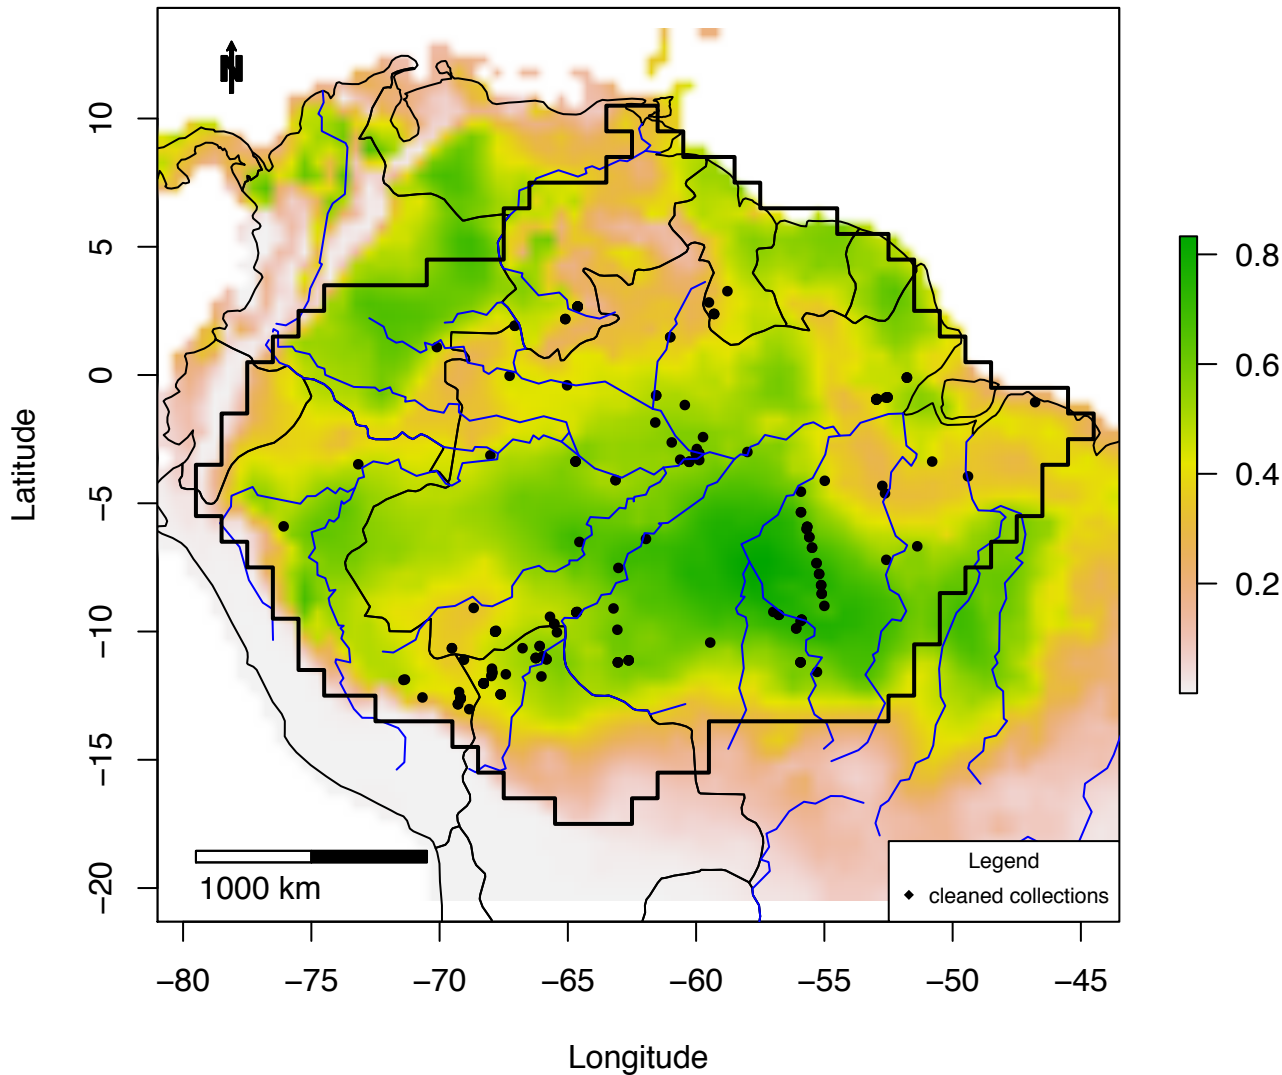

**Figure S3\_12C IDW map of *Bertholletia excelsa*:**  
plots =0 – 0.07; IDW: 0 – 0.01

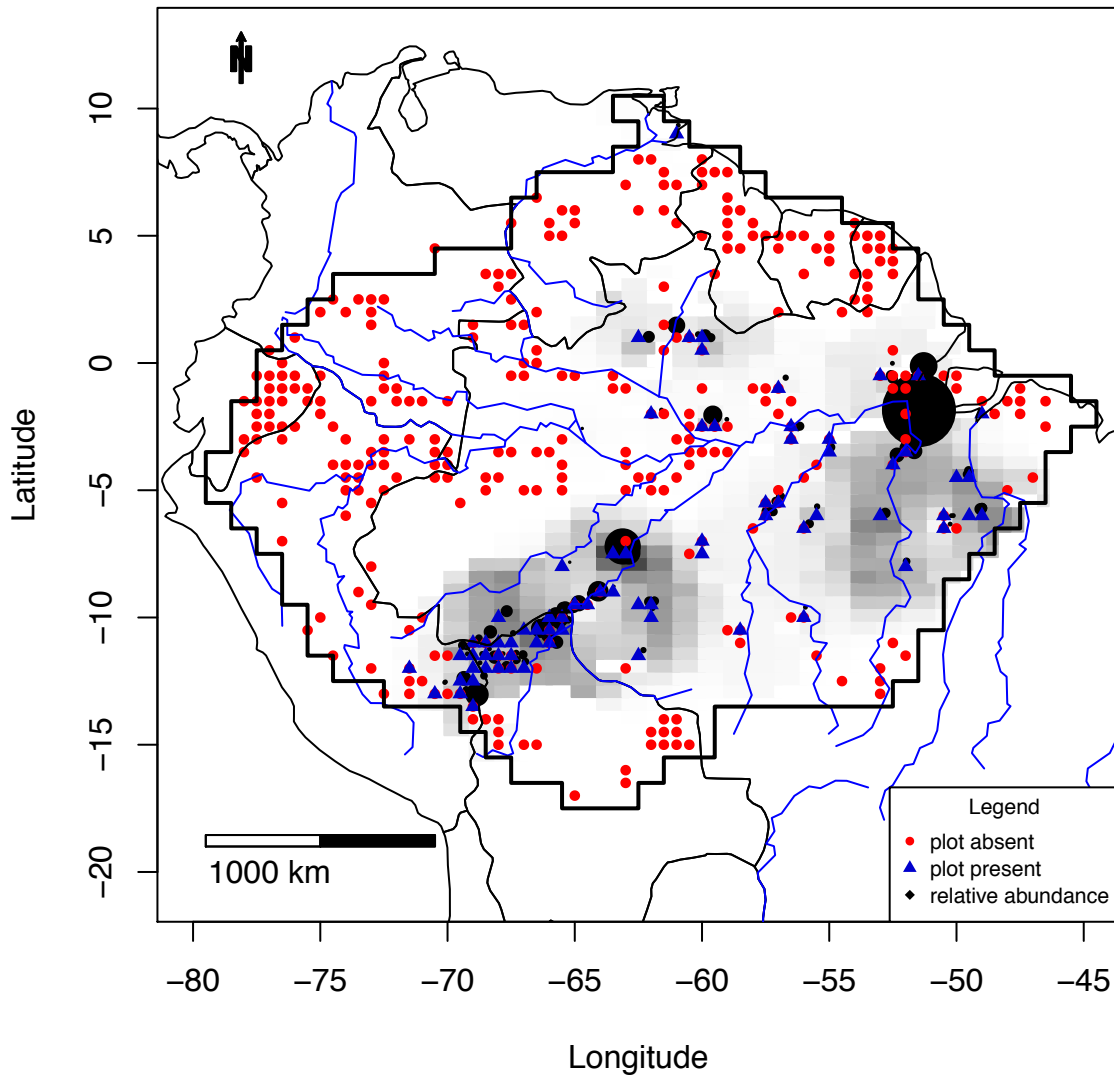

Figure S3\_13A Combined map of *Bocageopsis\_multiflora*

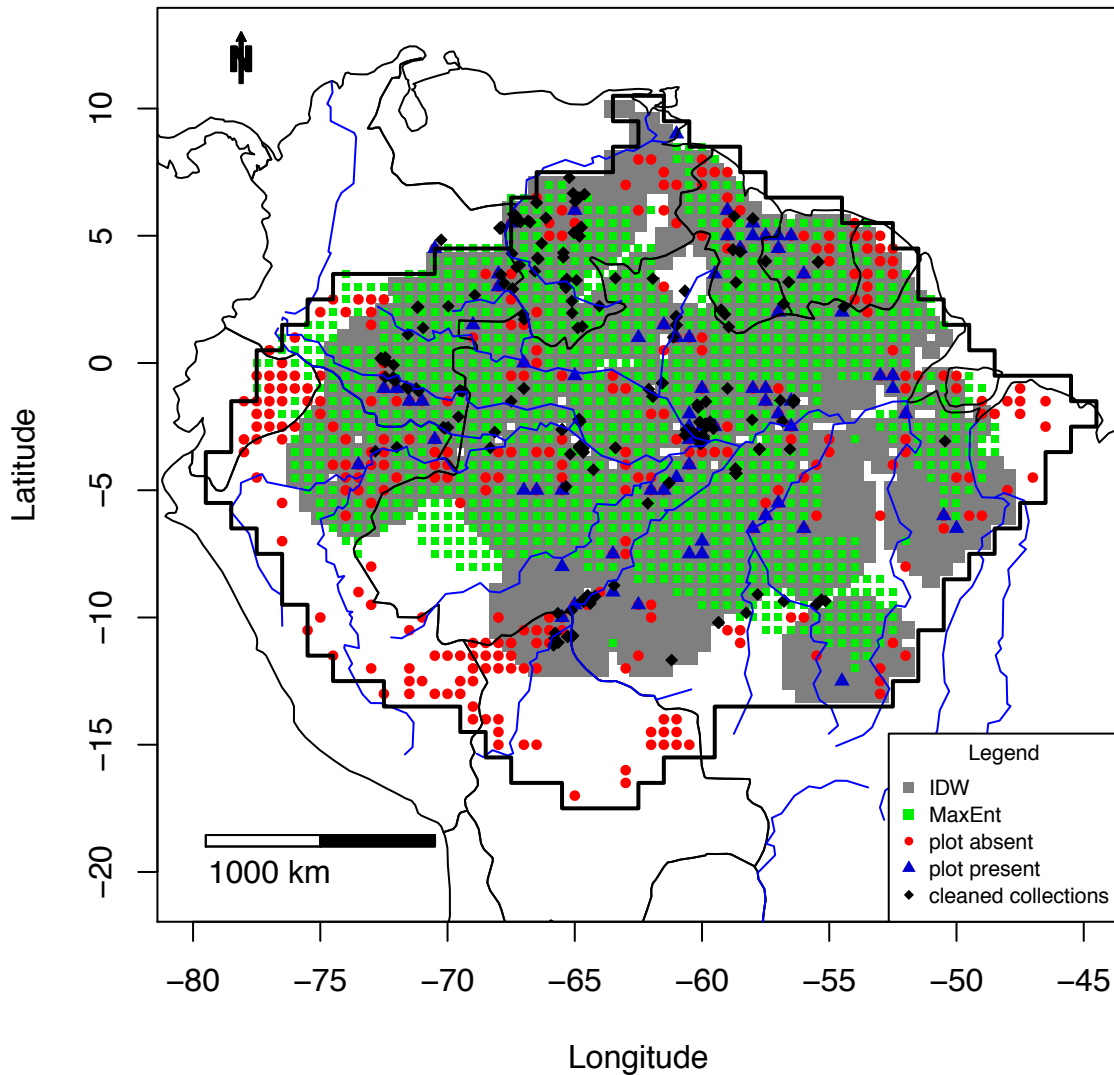

Figure S3\_13B MaxEnt map of *Bocageopsis\_multiflora*

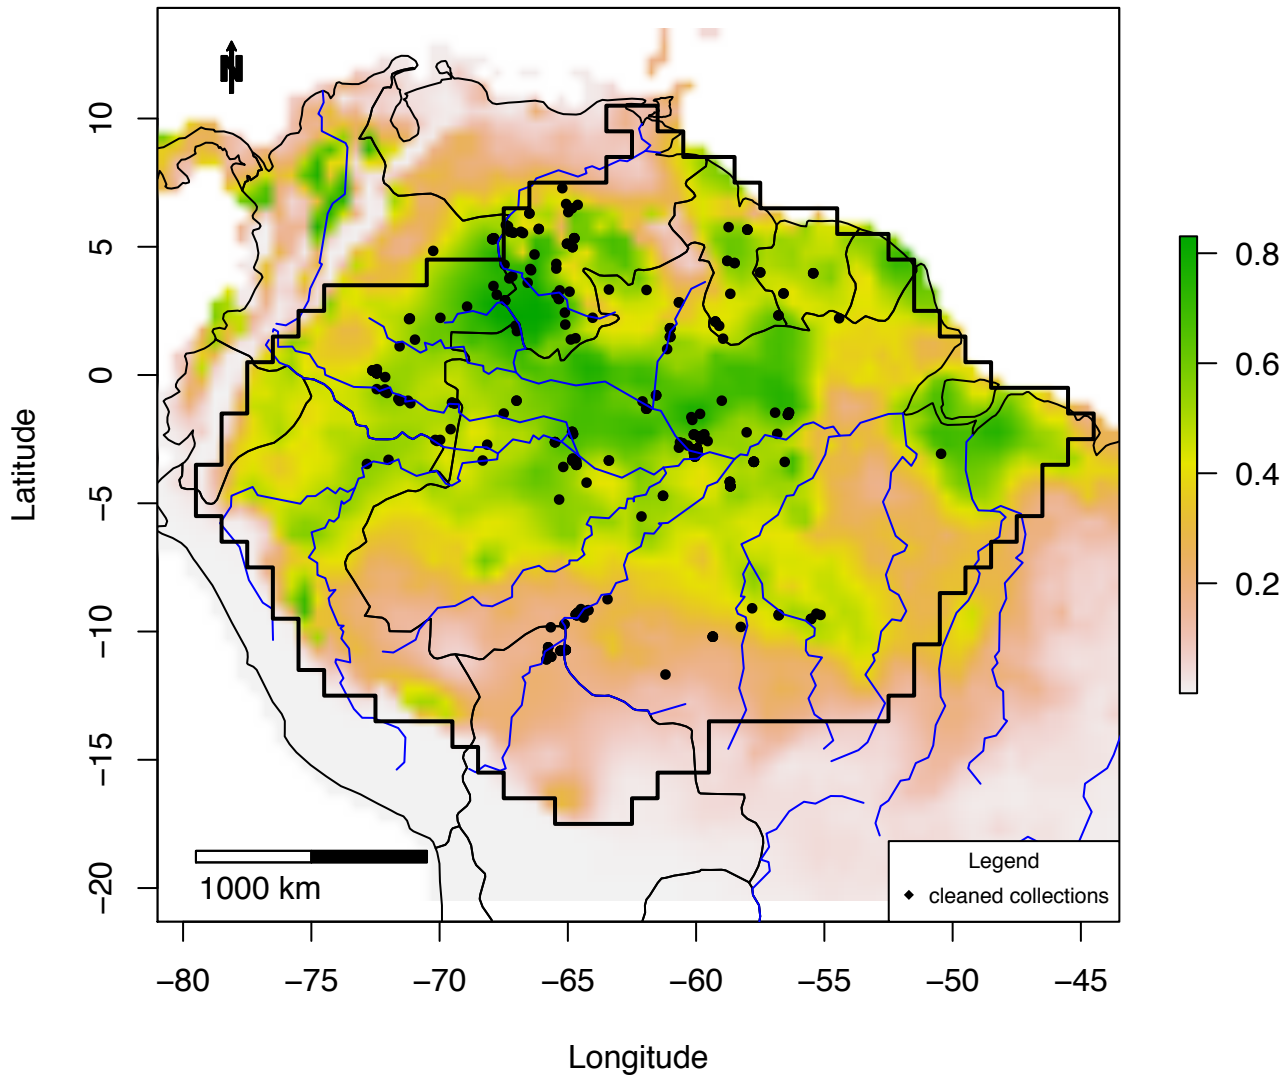

Figure S3\_13C IDW map of *Bocageopsis multiflora*:  
plots =0 – 0.15; IDW: 0 – 0.05

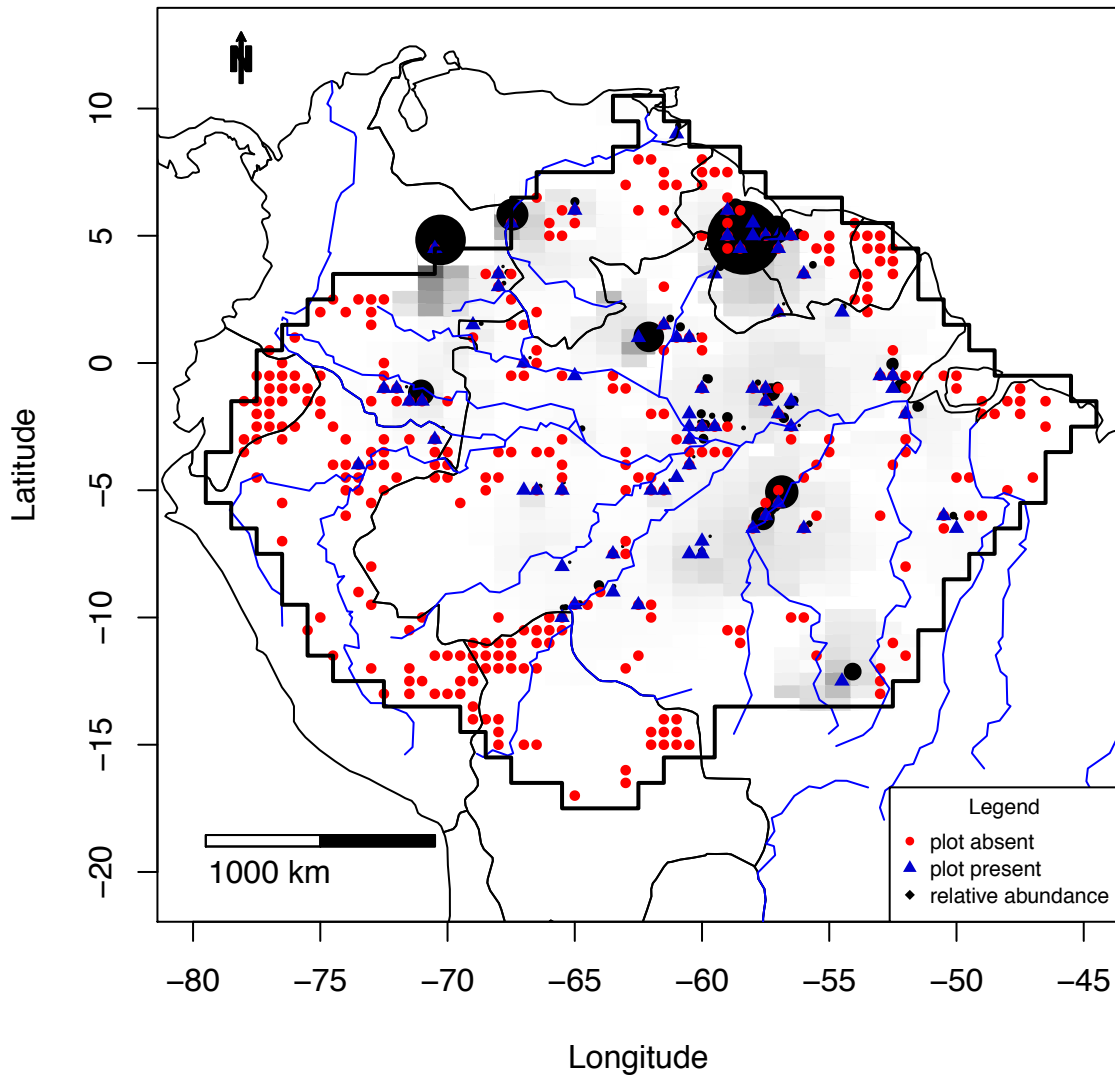



Figure S3\_14A Combined map of *Brosimum\_rubescens*

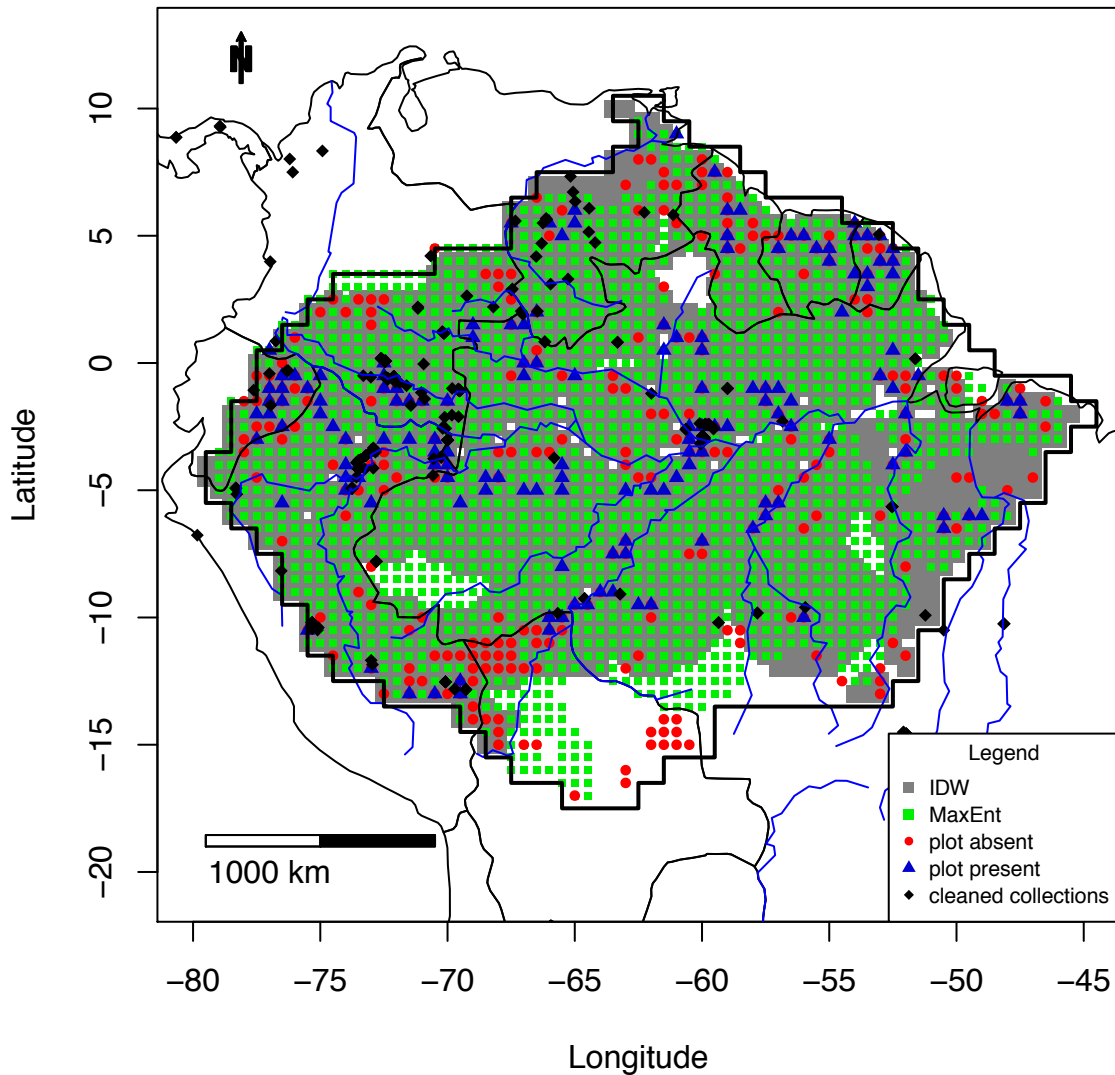

Figure S3\_14B MaxEnt map of *Brosimum\_rubescens*

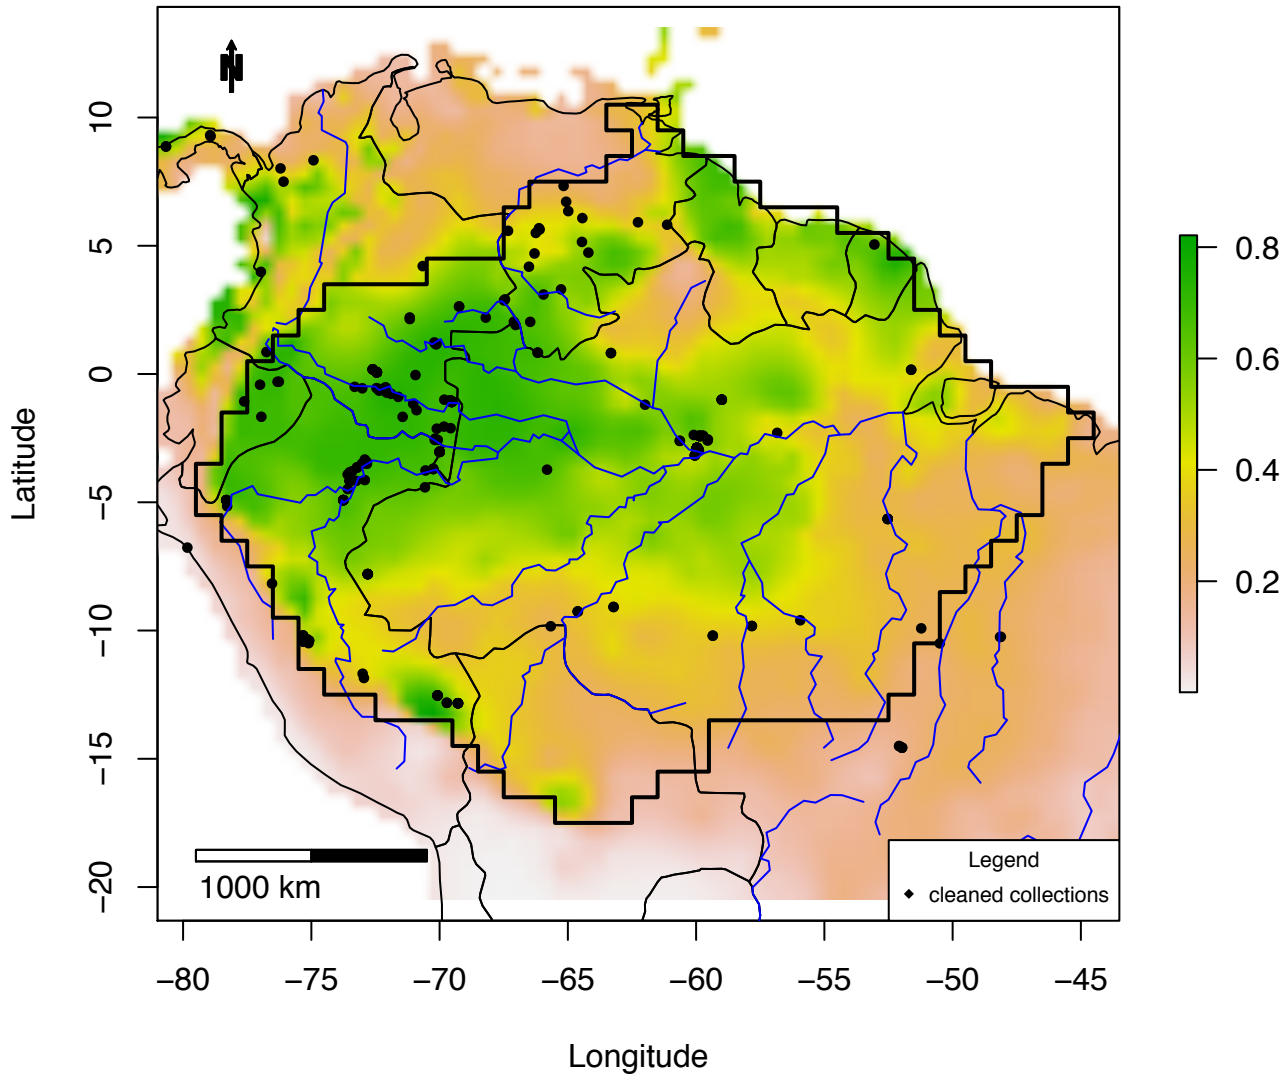

Figure S3\_14C IDW map of *Brosimum\_rubescens*:  
plots =0 – 0.42; IDW: 0 – 0.03

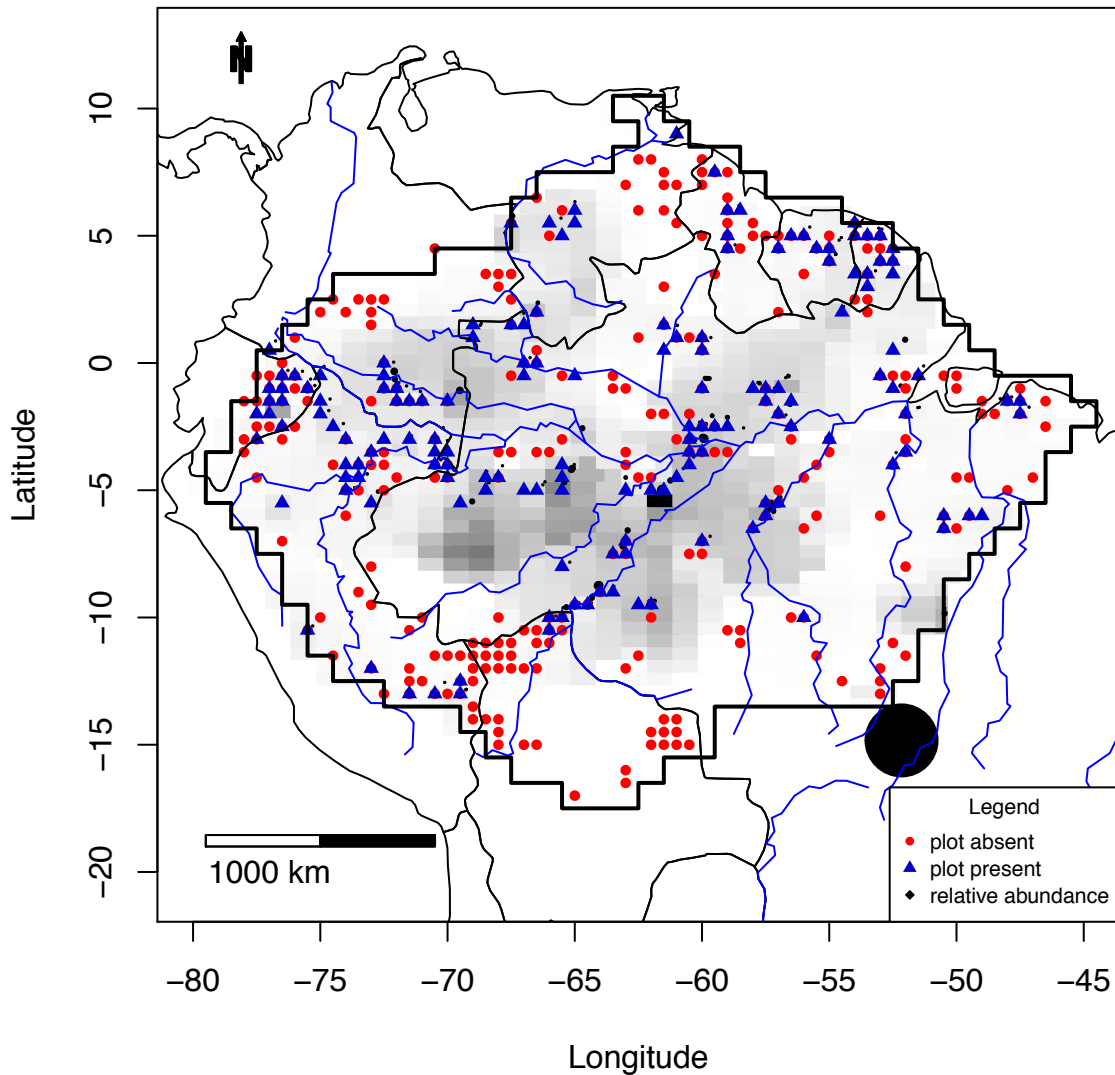

Figure S3\_15A Combined map of *Brosimum\_utile*

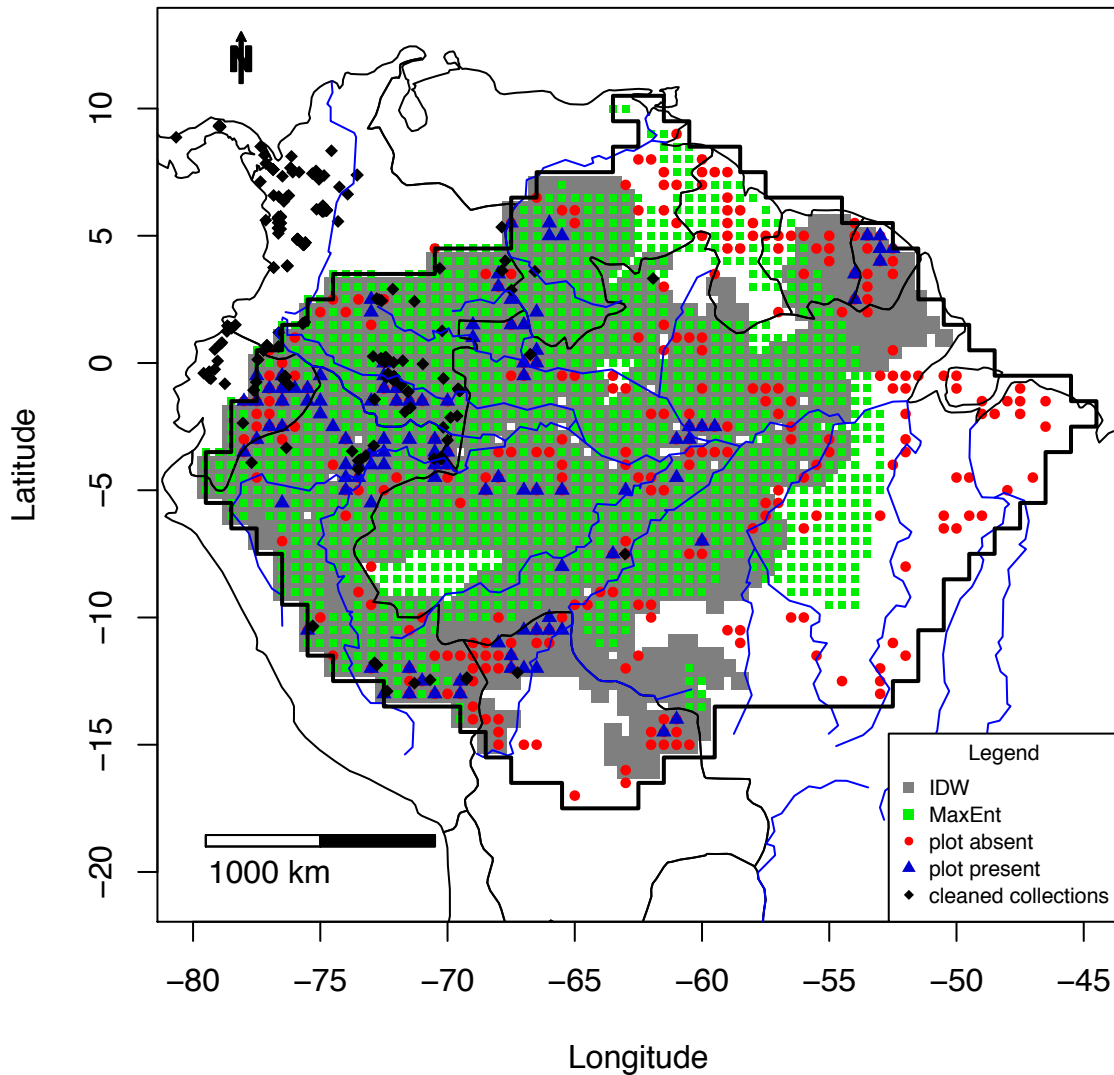

Figure S3\_15B MaxEnt map of *Brosimum\_utile*

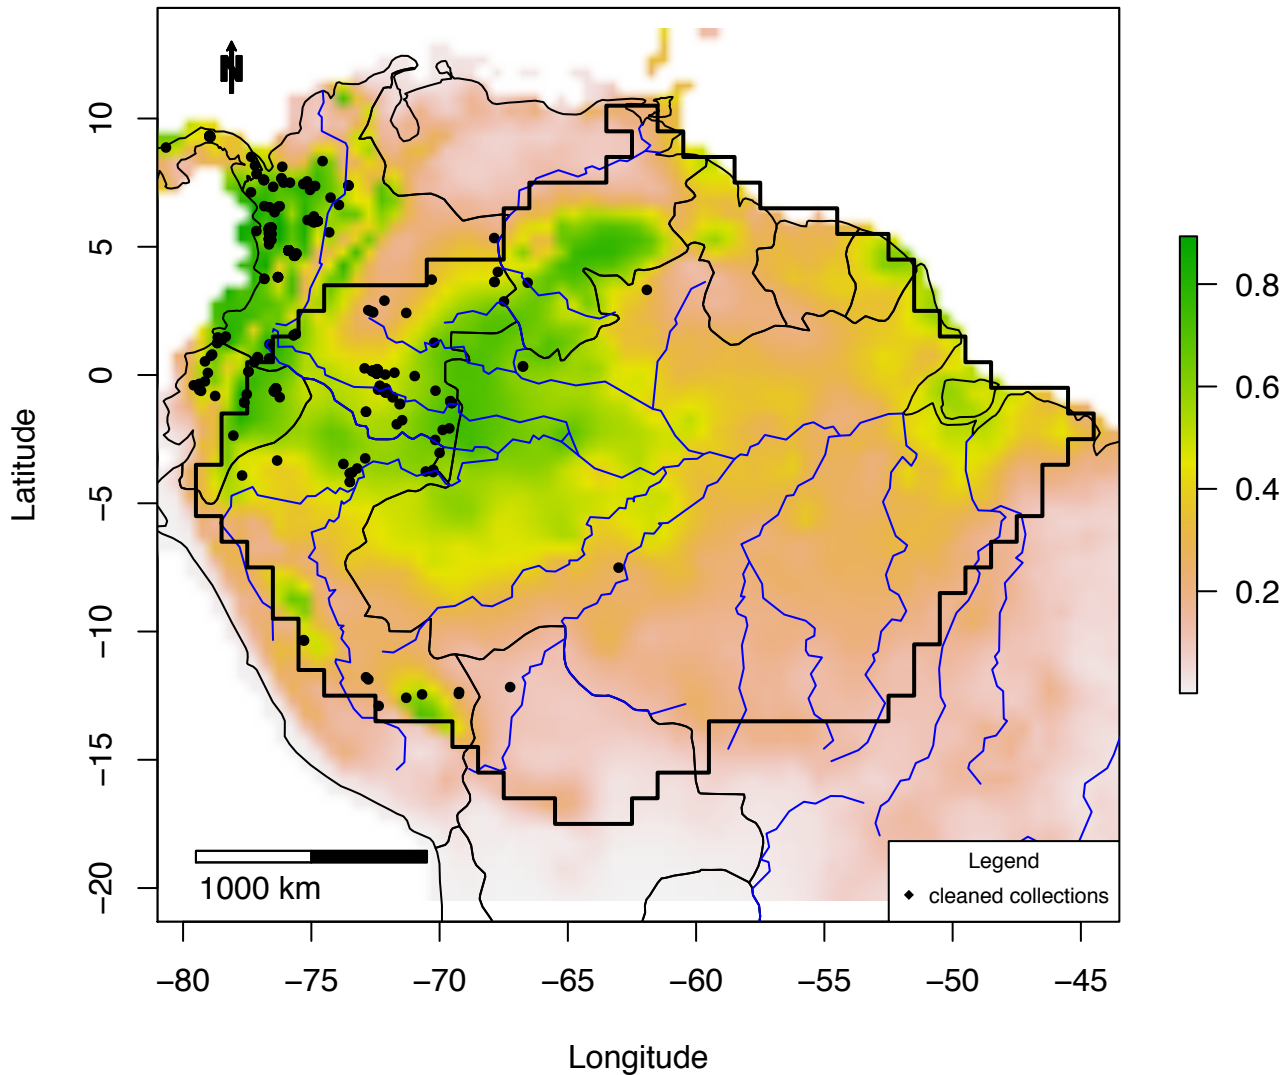

Figure S3\_15C IDW map of *Brosimum\_utile*:  
plots =0 – 0.06; IDW: 0 – 0.02

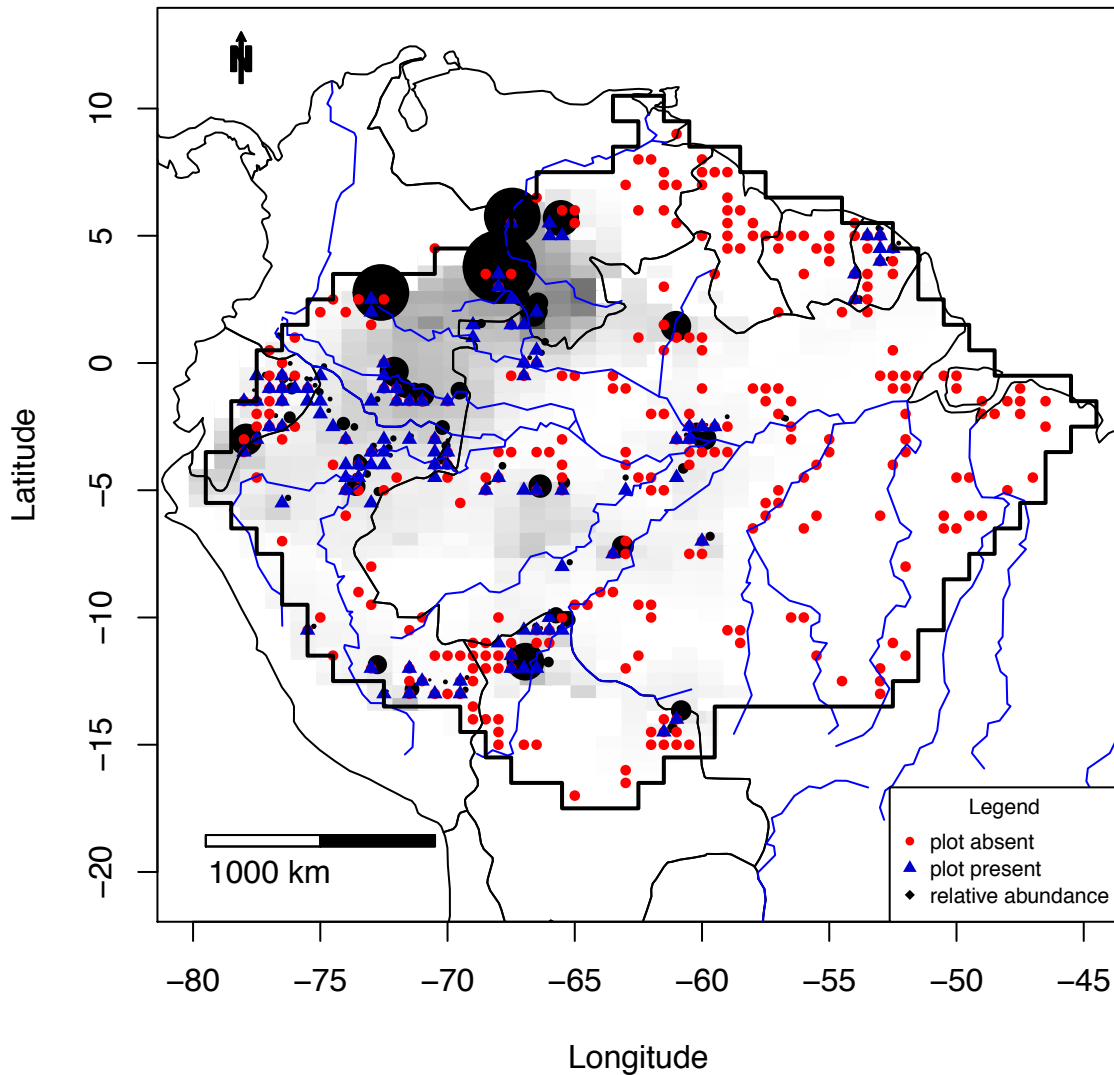

Figure S3\_16A Combined map of *Campsiandra\_implexicaulis*

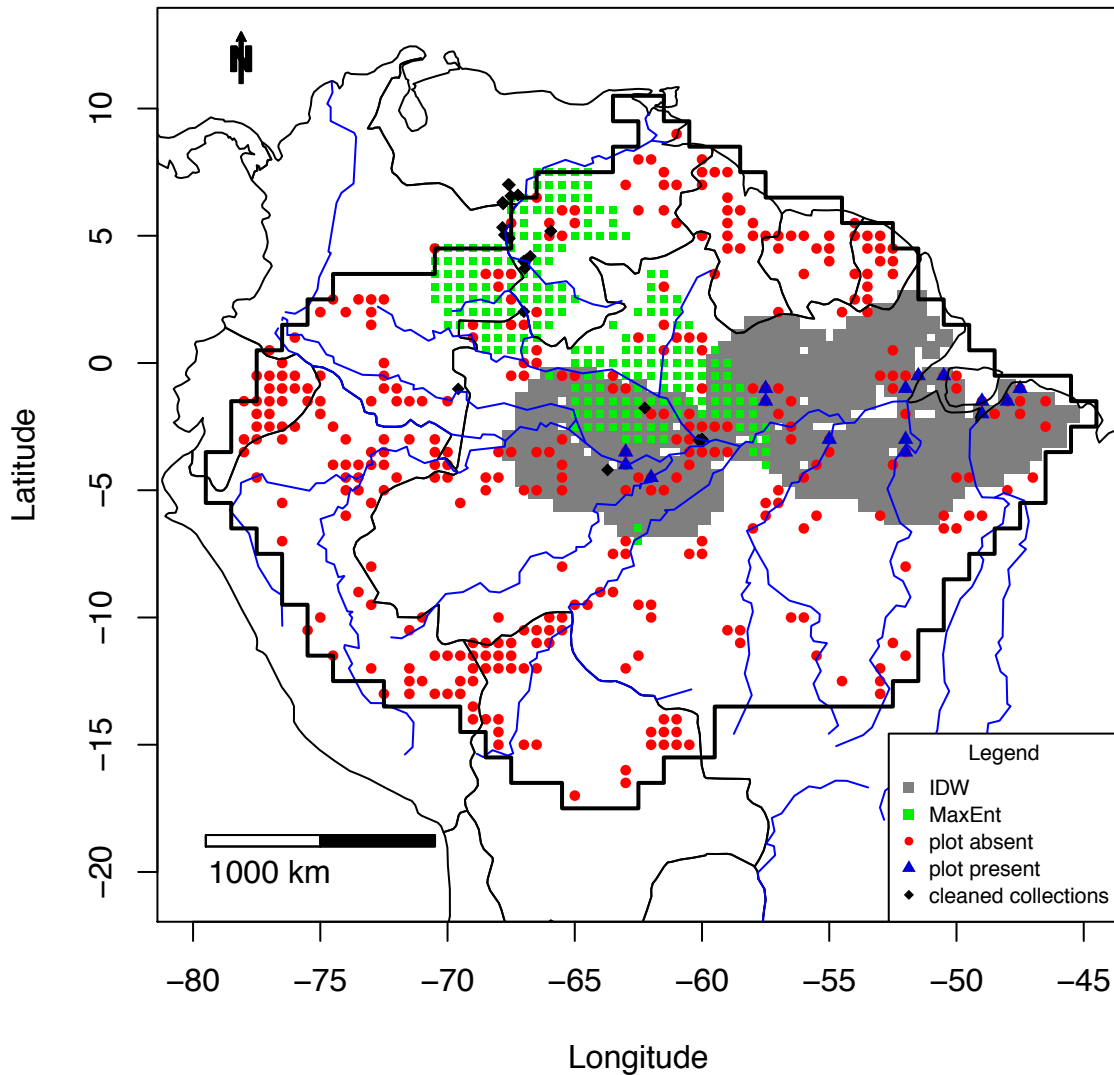

Figure S3\_16B MaxEnt map of *Campsiandra\_implexicaulis*

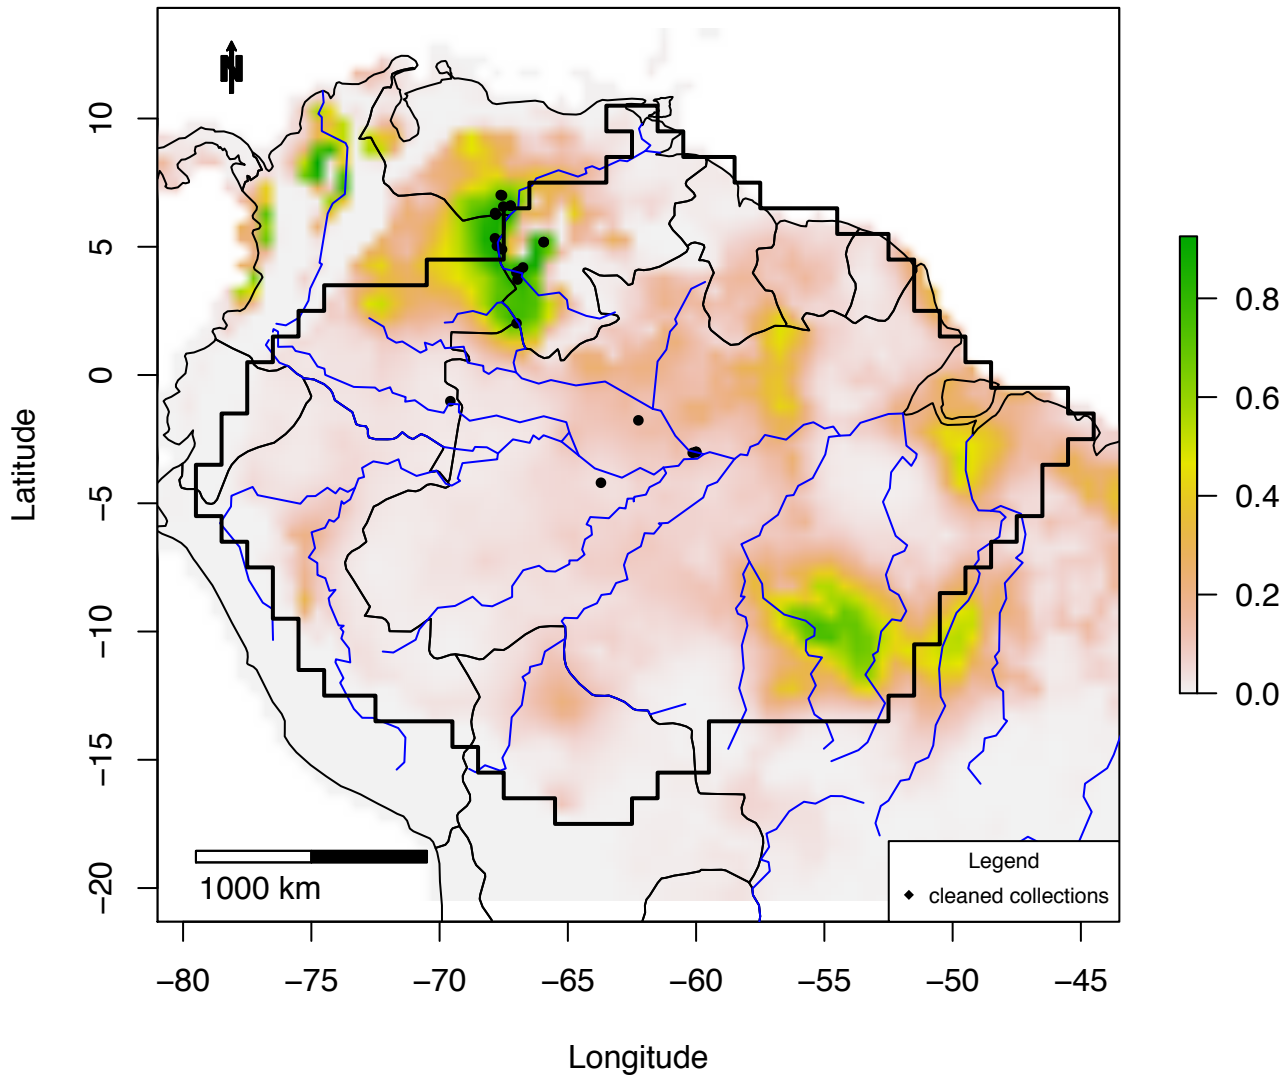



**Figure S3\_16C IDW map of *Campsiandra implexicaulis*:**  
plots = 0 – 0.34; IDW: 0 – 0.06

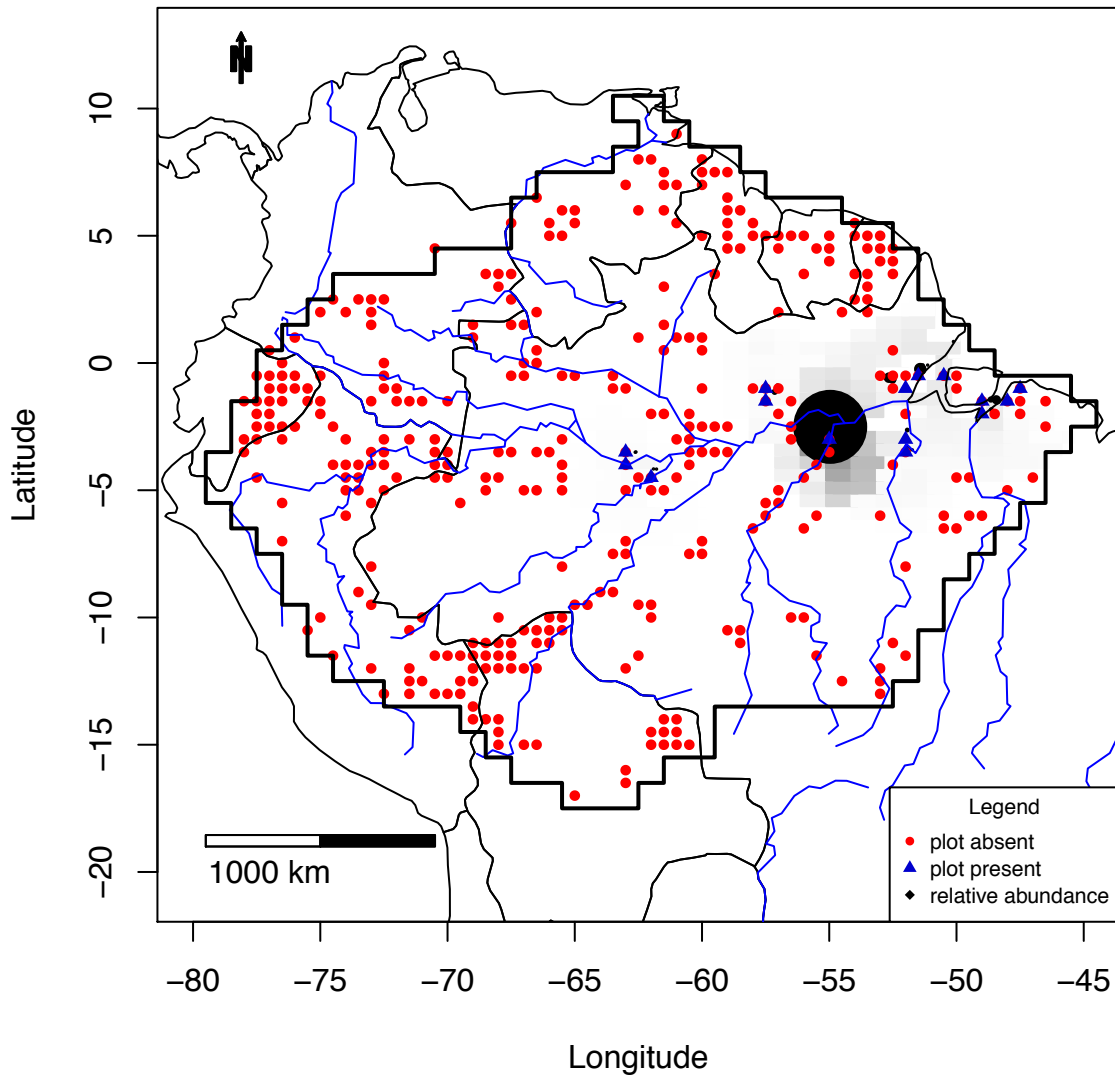

Figure S3\_17A Combined map of *Caraipa densifolia*

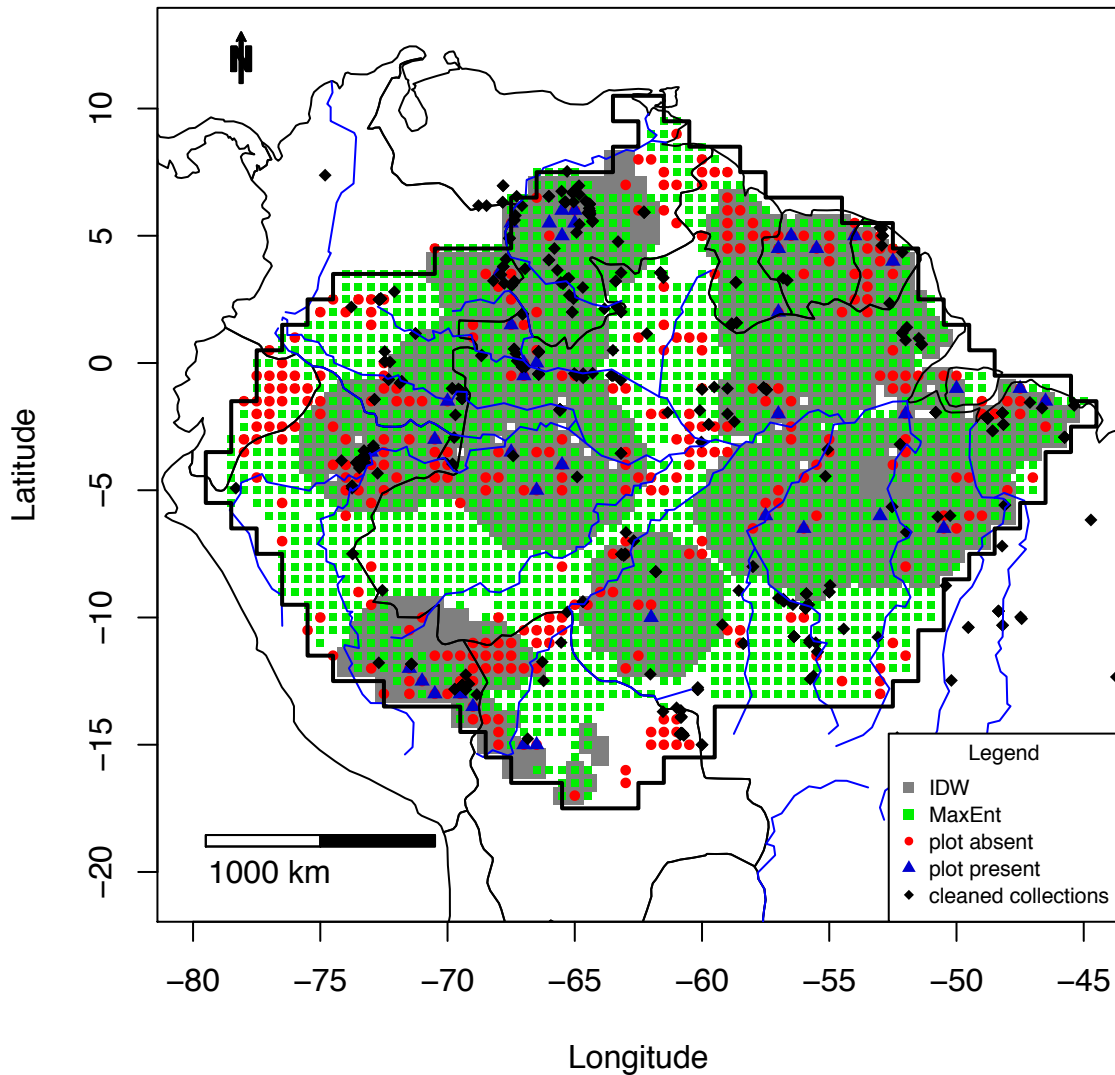

Figure S3\_17B MaxEnt map of *Caraipa\_densifolia*

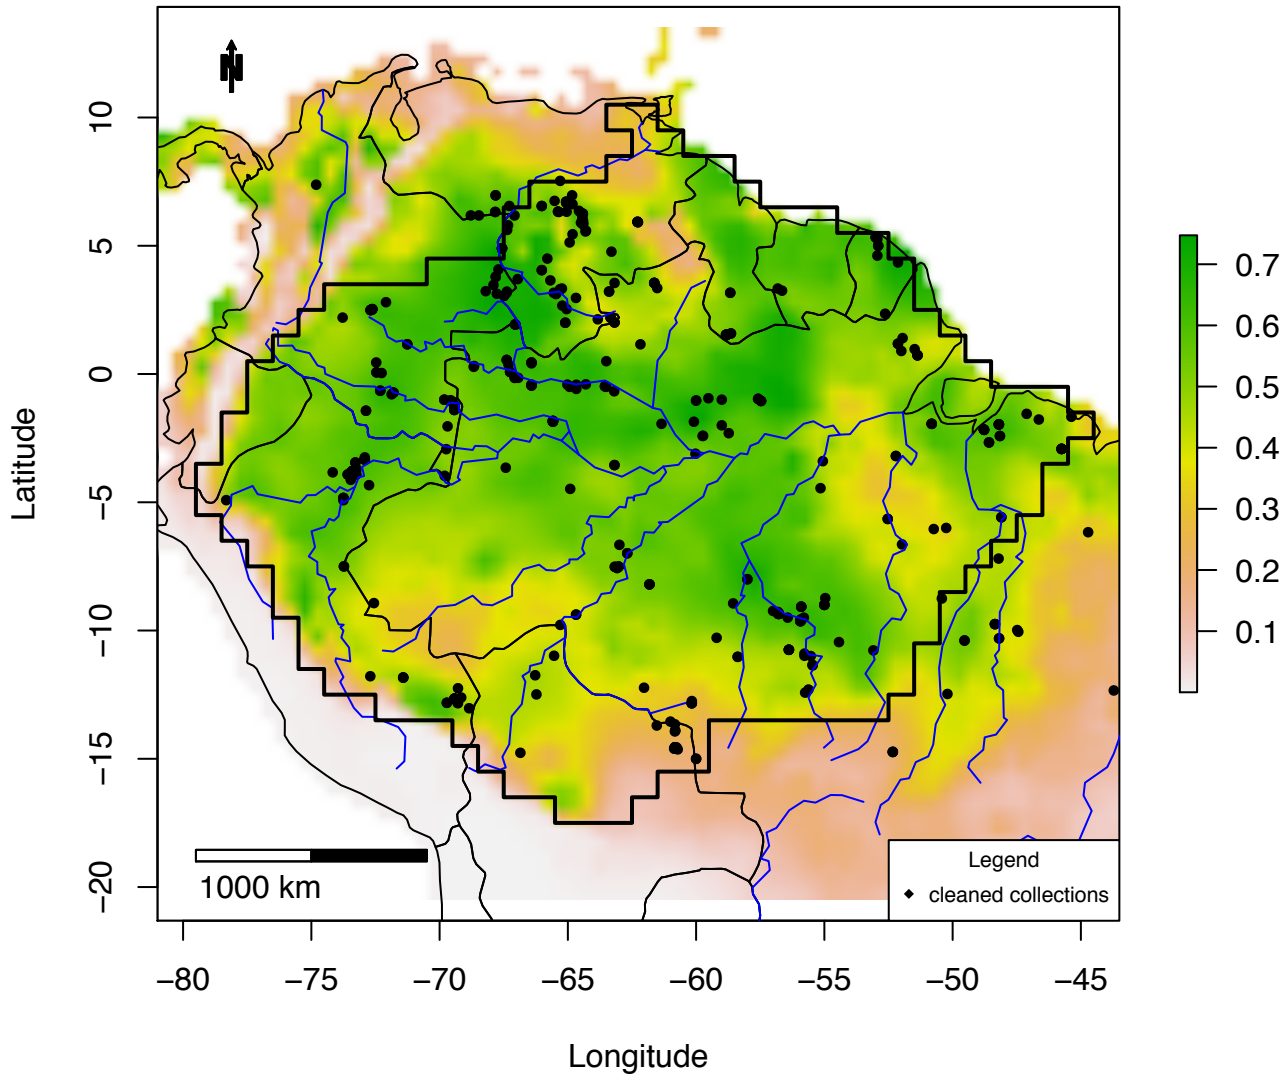

Figure S3\_17C IDW map of *Caraipa densifolia*:  
plots =0 – 0.14; IDW: 0 – 0.03

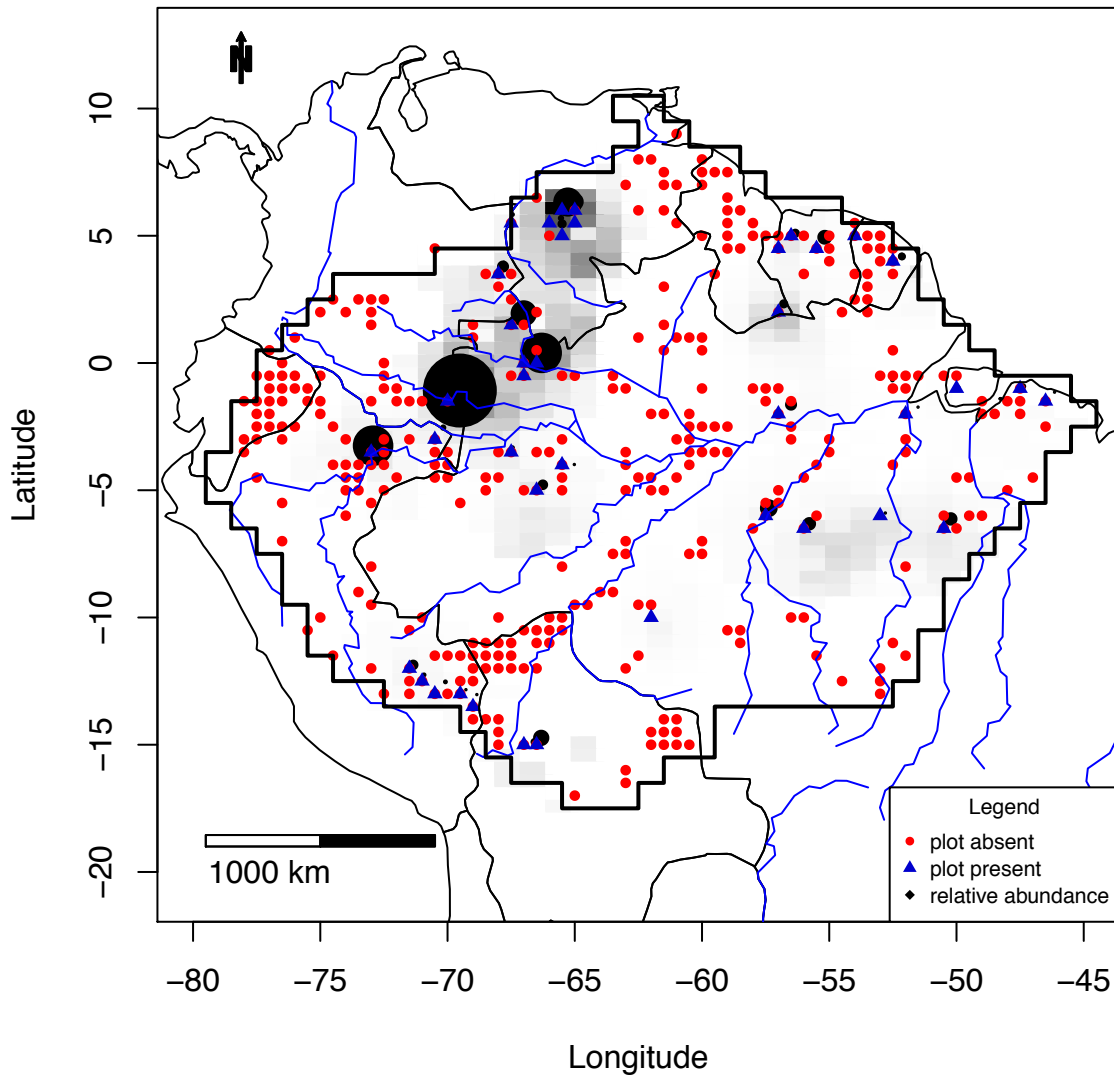

Figure S3\_18A Combined map of *Carapa guianensis*

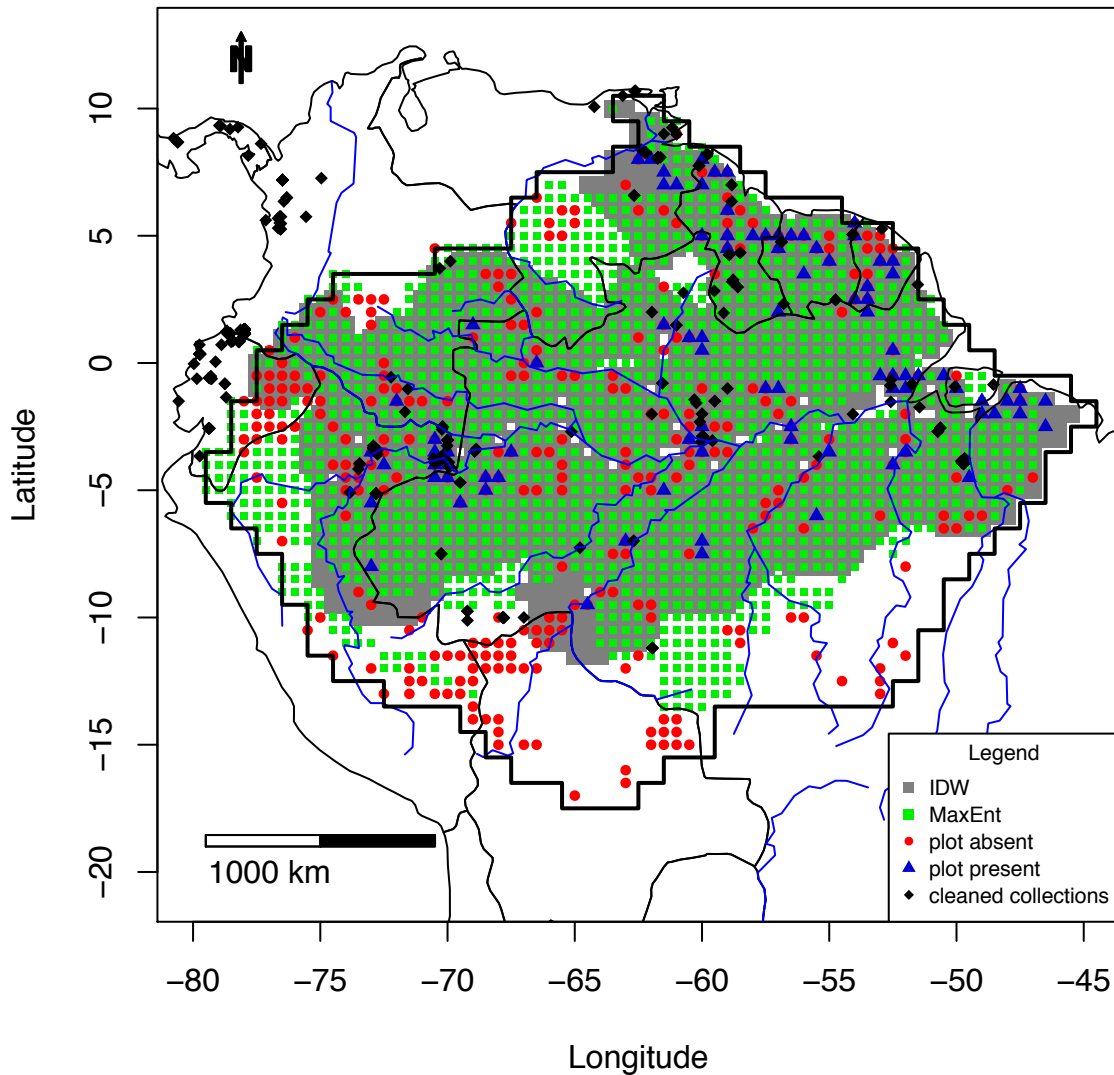

Figure S3\_18B MaxEnt map of *Carapa\_guianensis*

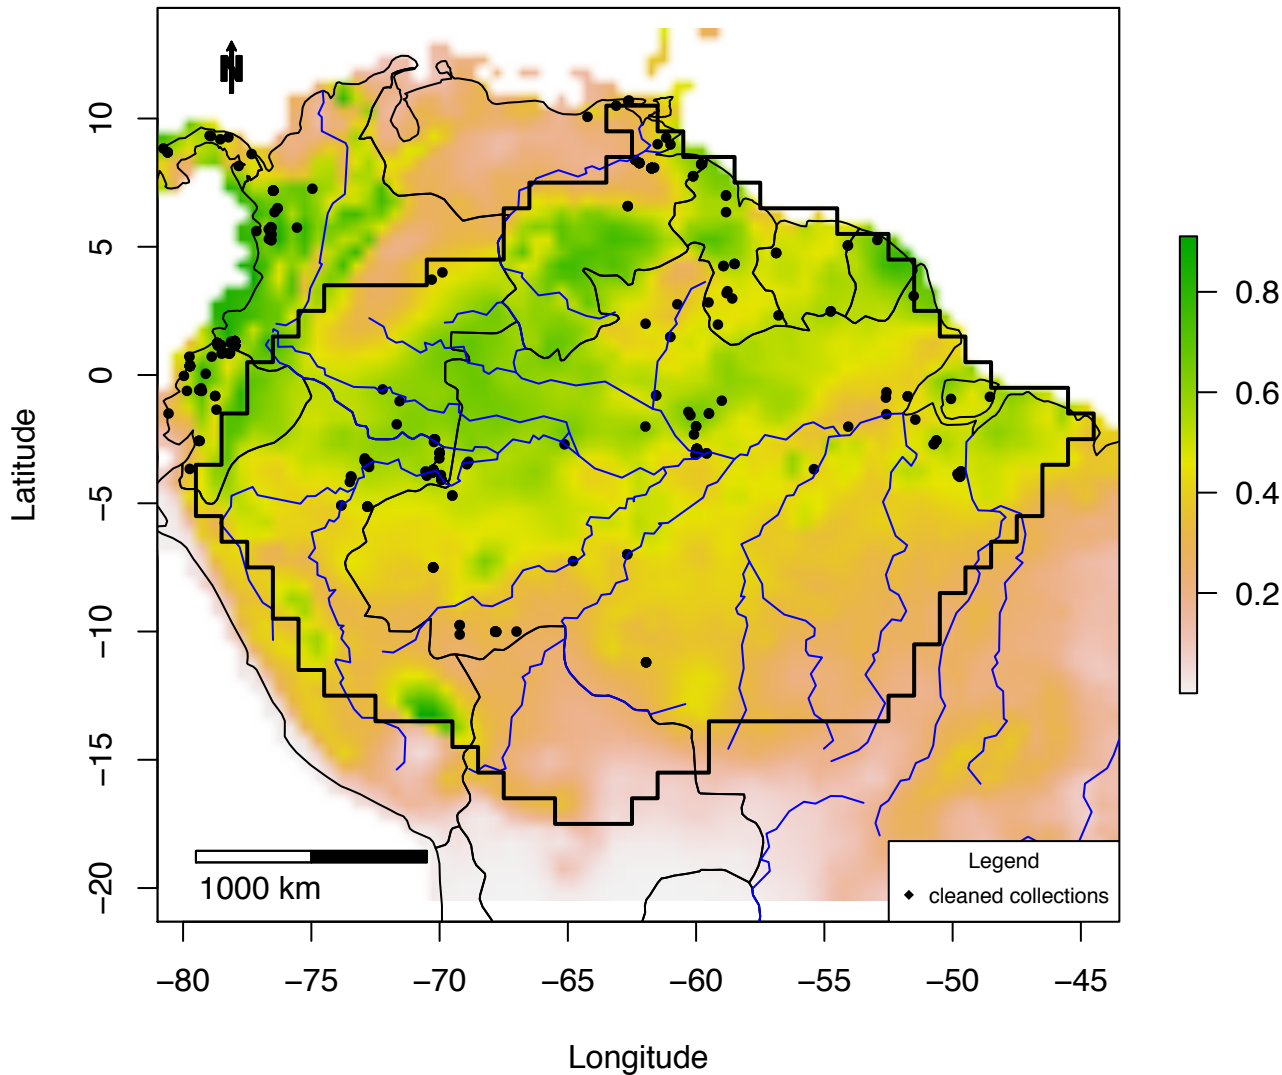

**Figure S3\_18C IDW map of *Carapa guianensis*:**  
**plots =0 – 0.17; IDW: 0 – 0.04**

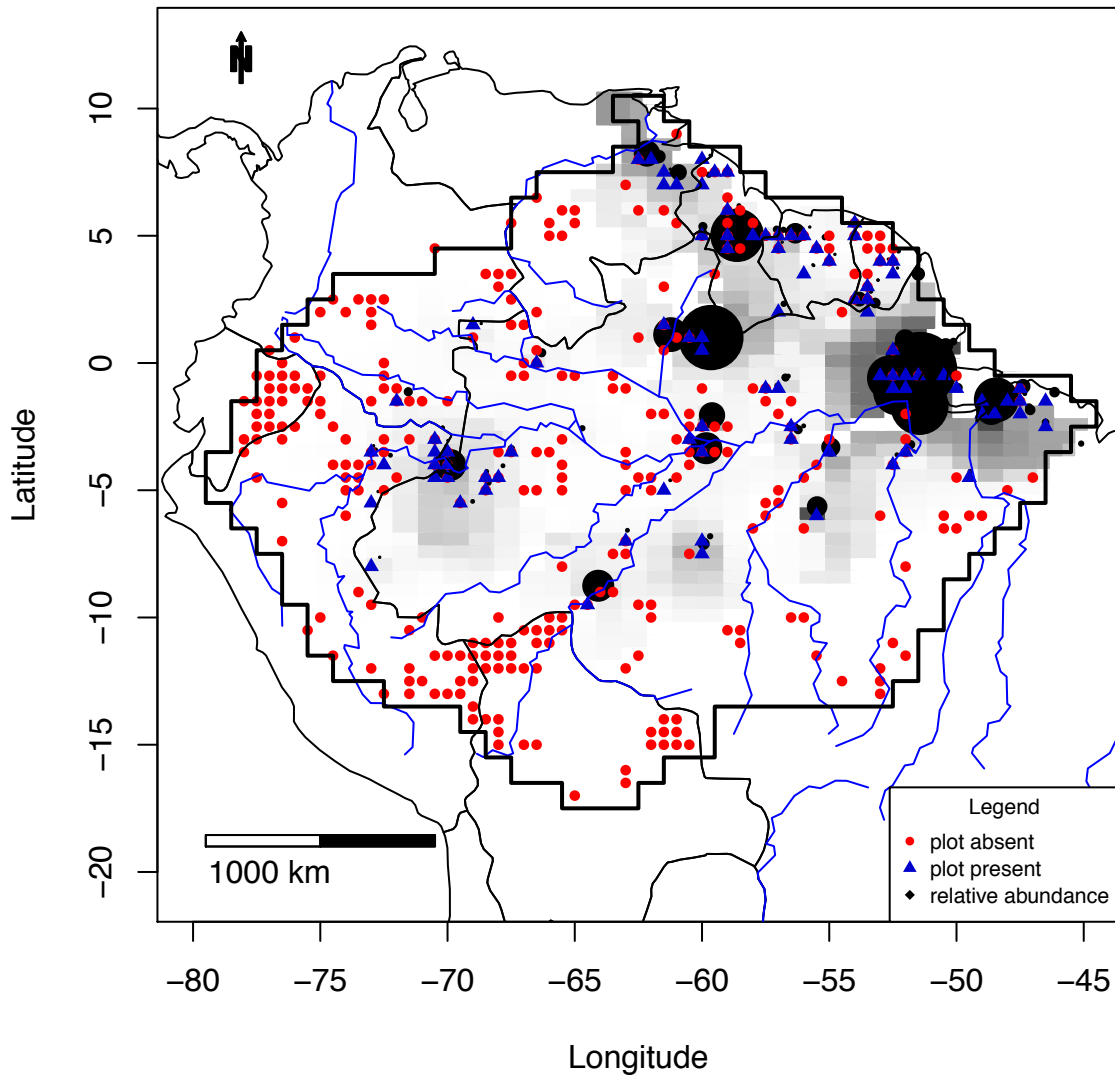

Figure S3\_19A Combined map of *Caryocar glabrum*

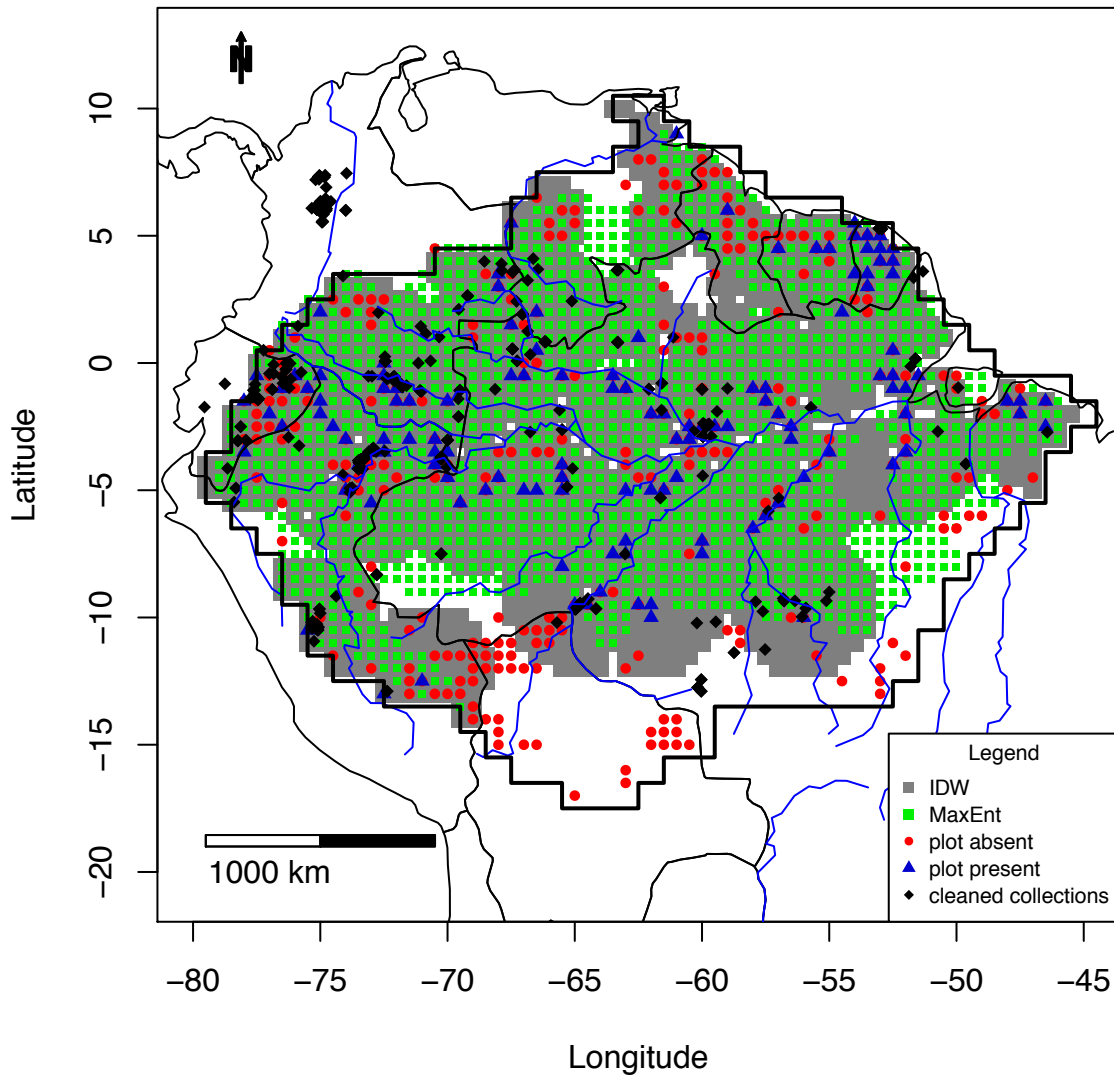



Figure S3\_19B MaxEnt map of *Caryocar glabrum*

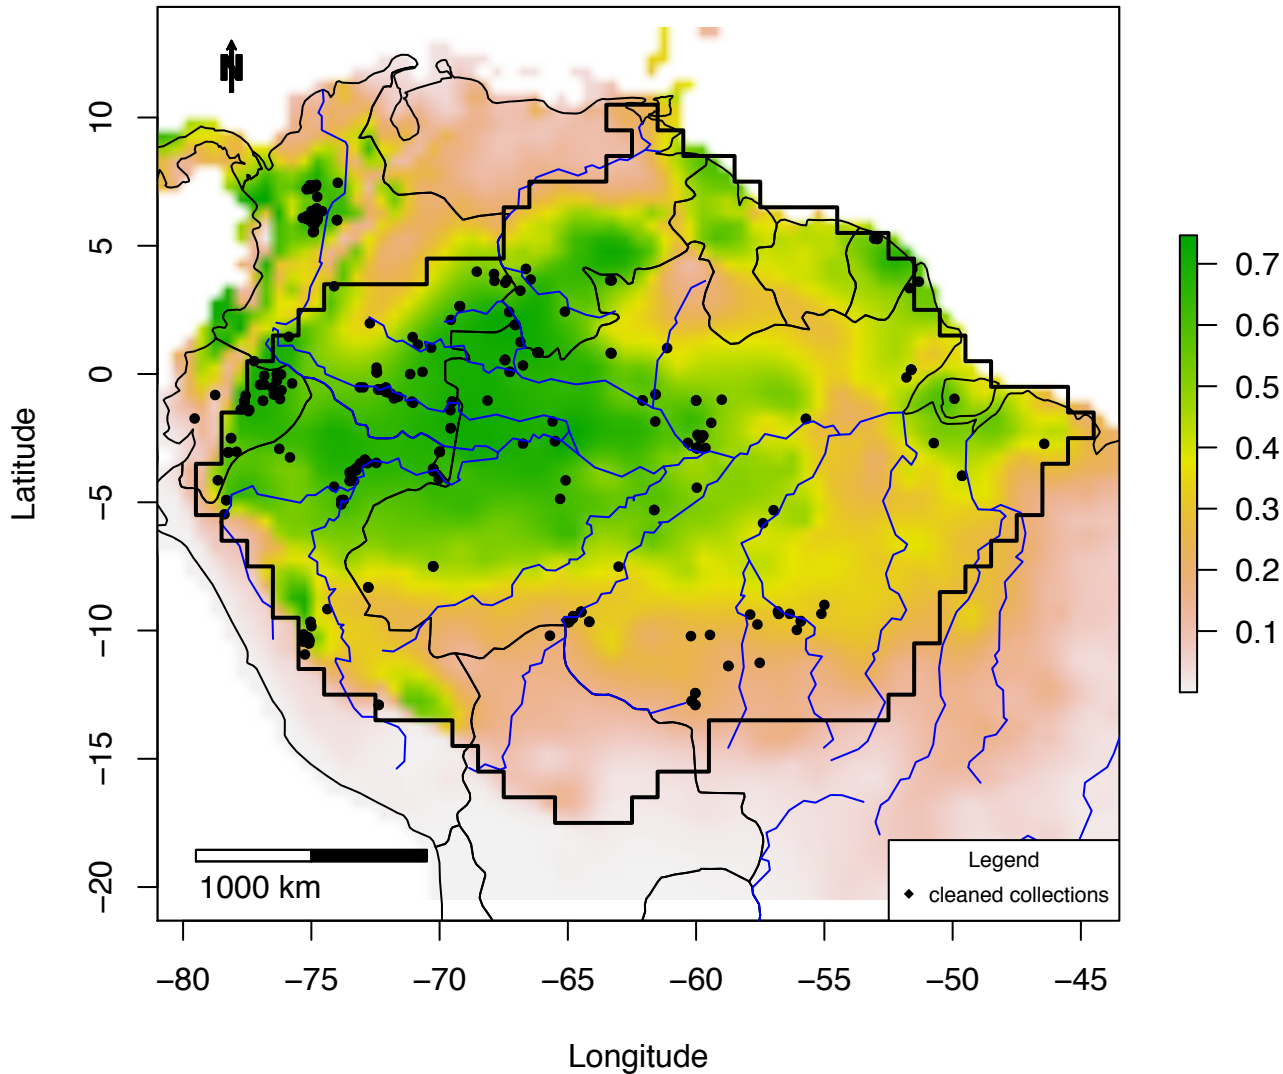

Figure S3\_19C IDW map of *Caryocar glabrum*:  
plots = 0 – 0.06; IDW: 0 – 0.03

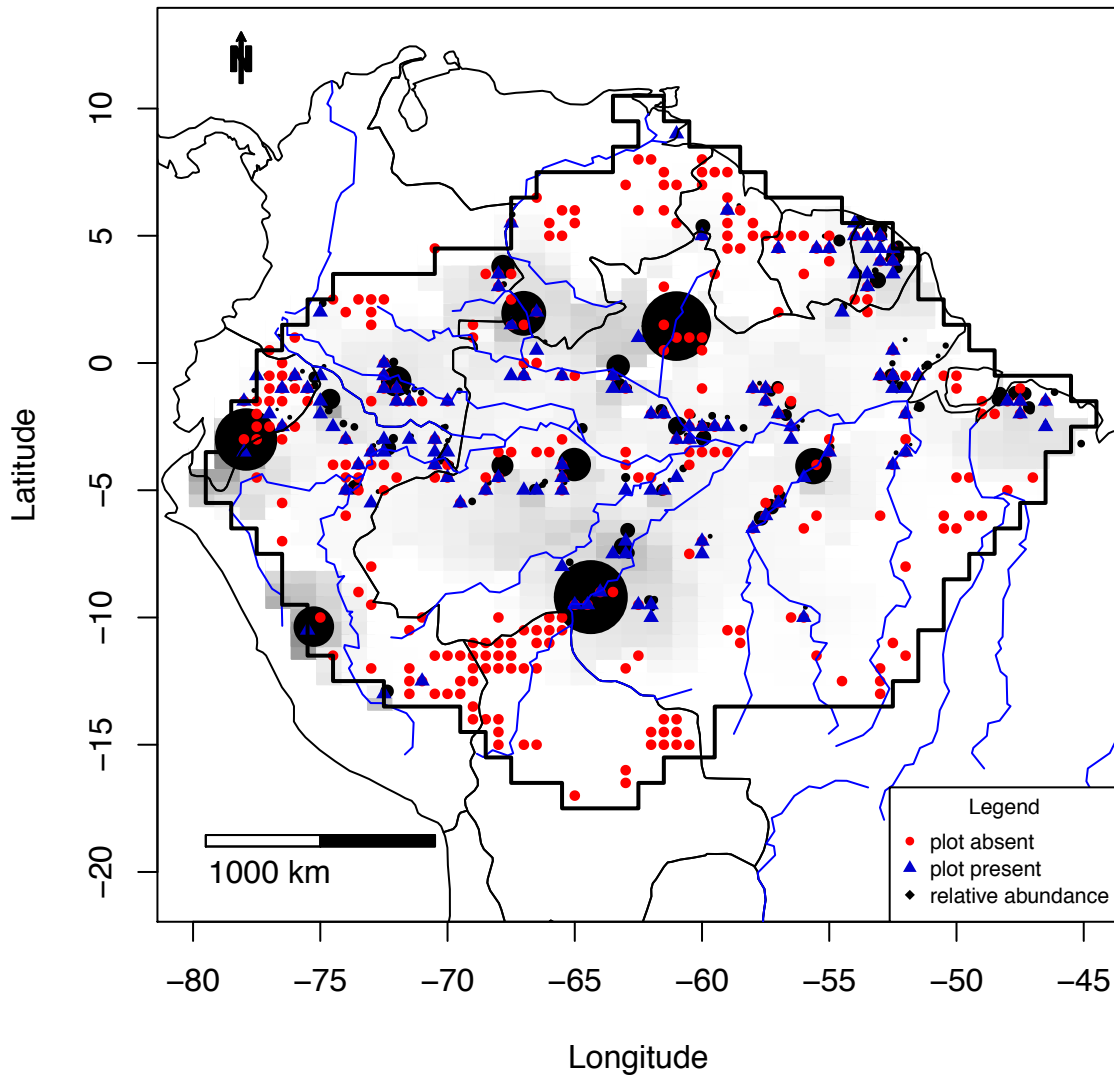

Figure S3\_20A Combined map of *Catostemma fragrans*

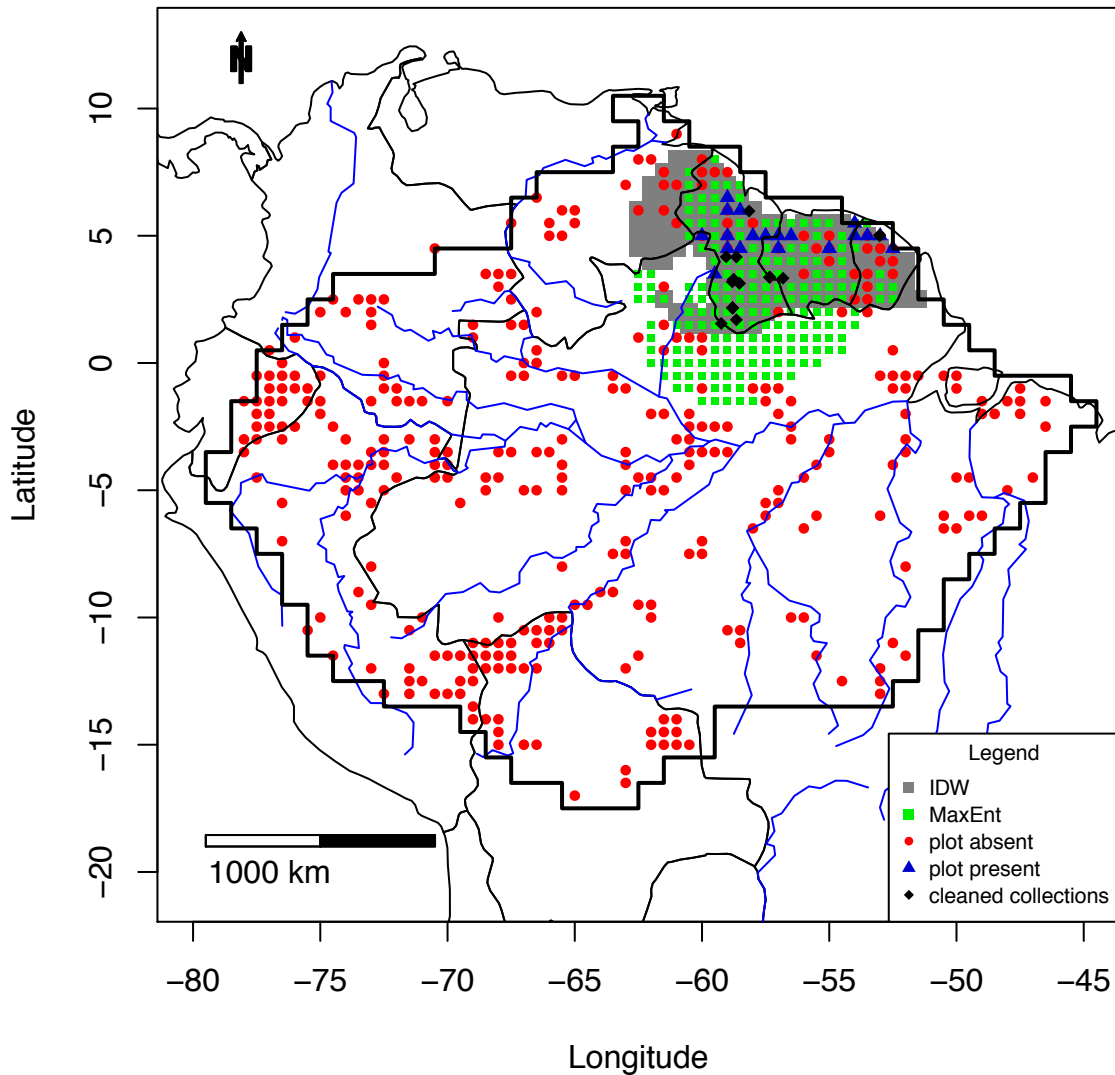

Figure S3\_20B MaxEnt map of *Catostemma fragrans*

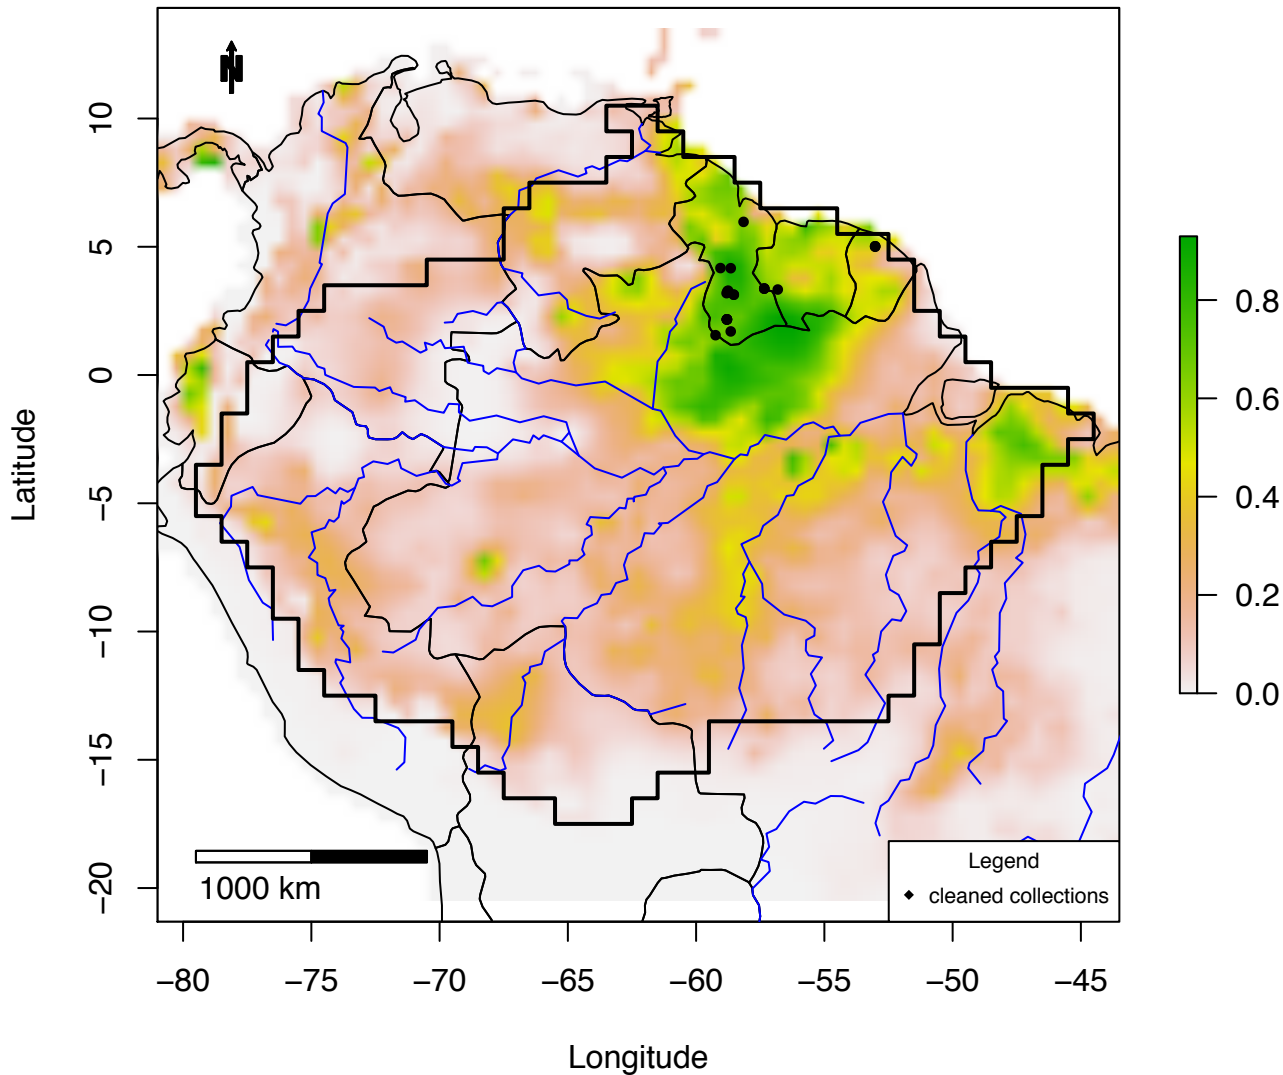

Figure S3\_20C IDW map of *Catostemma fragrans*:  
plots =0 – 0.33; IDW: 0 – 0.09

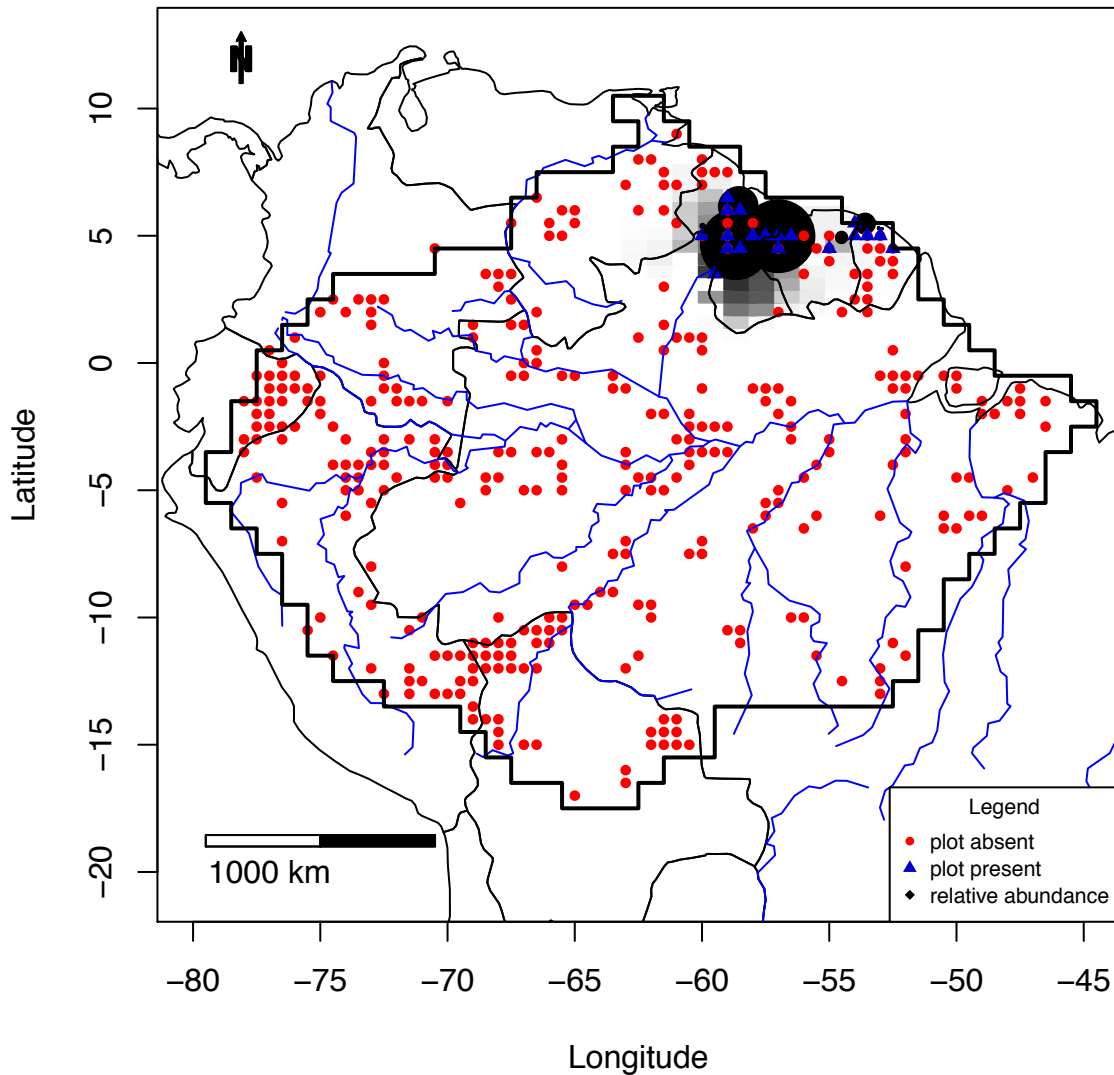

Figure S3\_21A Combined map of *Cecropia\_latiloba*

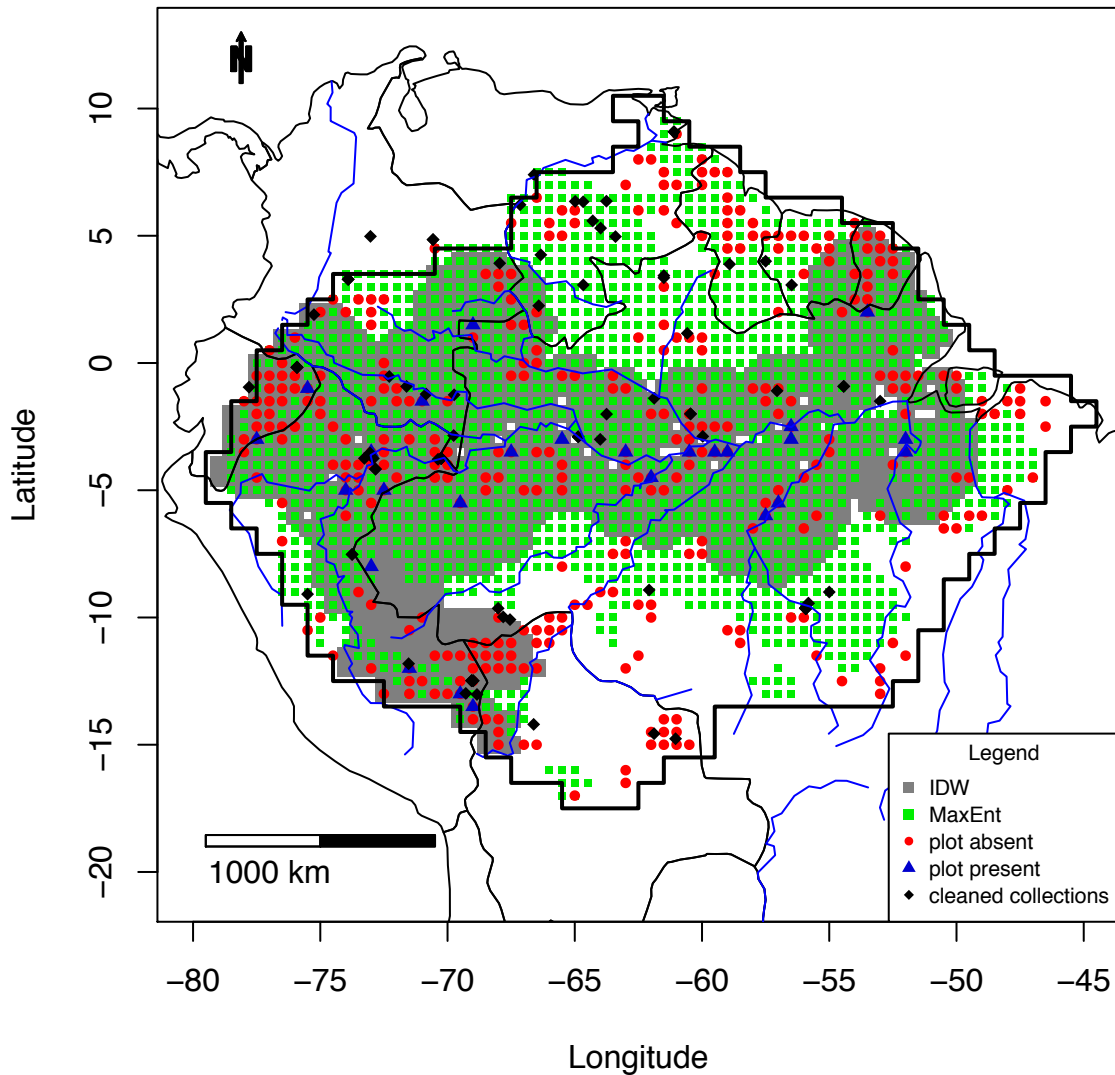

Figure S3\_21B MaxEnt map of *Cecropia\_latiloba*

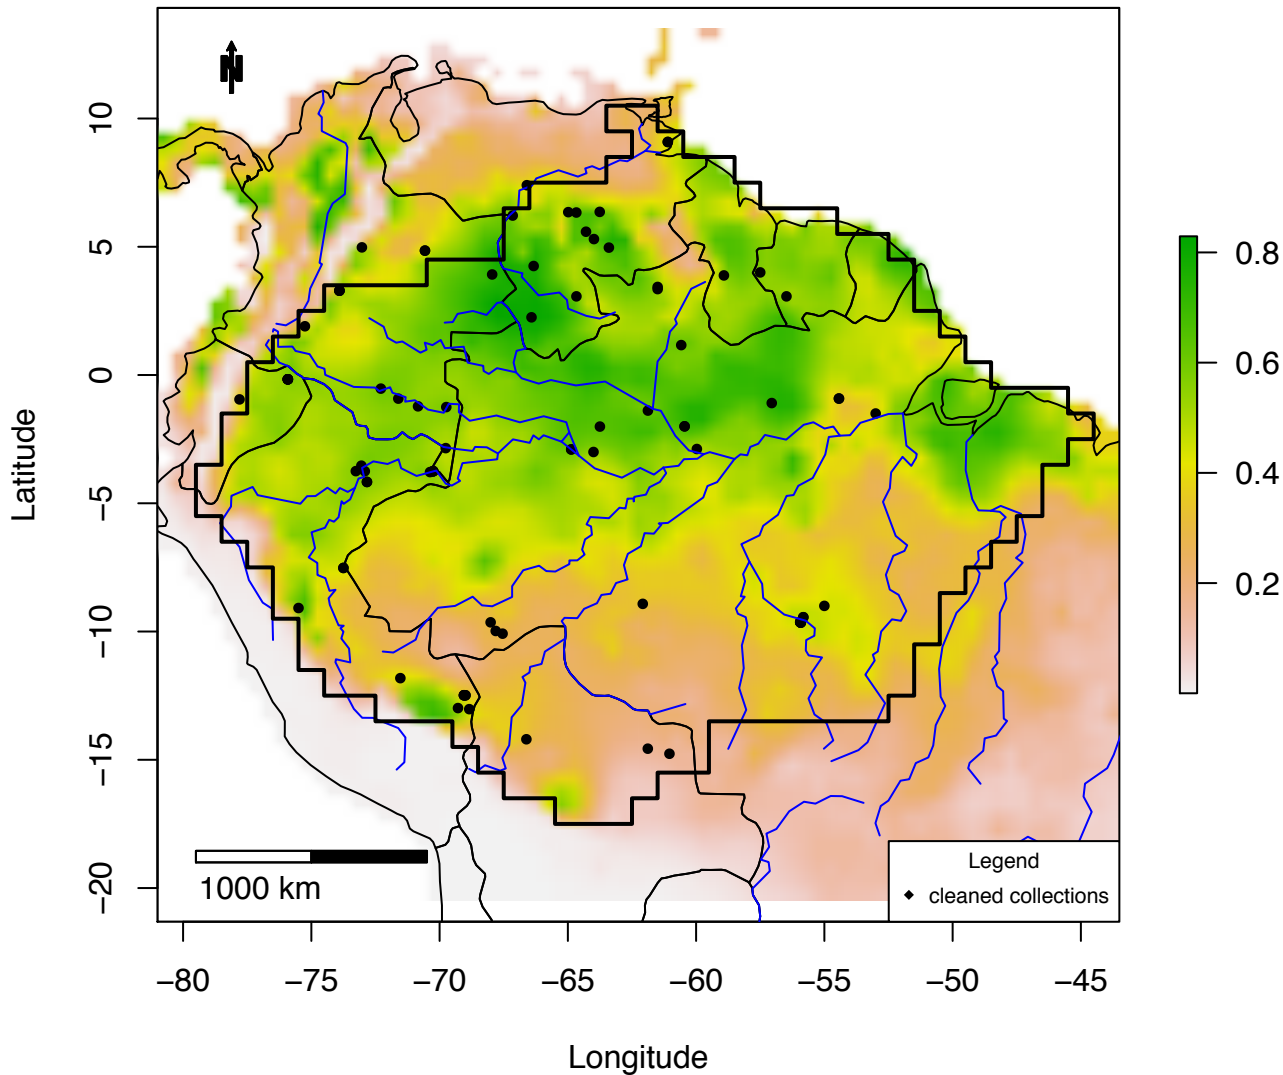

**Figure S3\_21C IDW map of *Cecropia latiloba*:**  
**plots =0 – 0.32; IDW: 0 – 0.03**

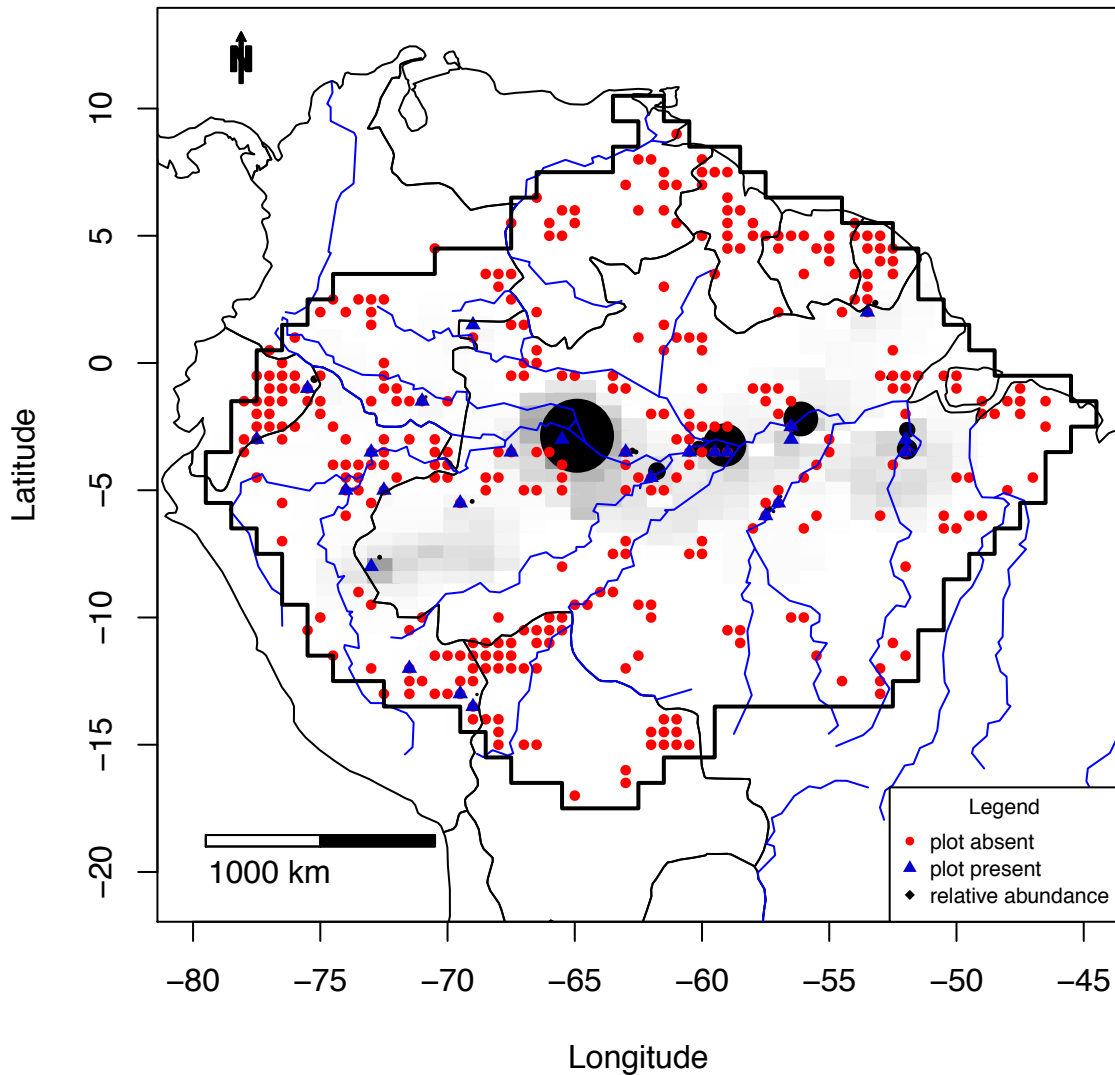



Figure S3\_22A Combined map of *Cecropia\_membranacea*

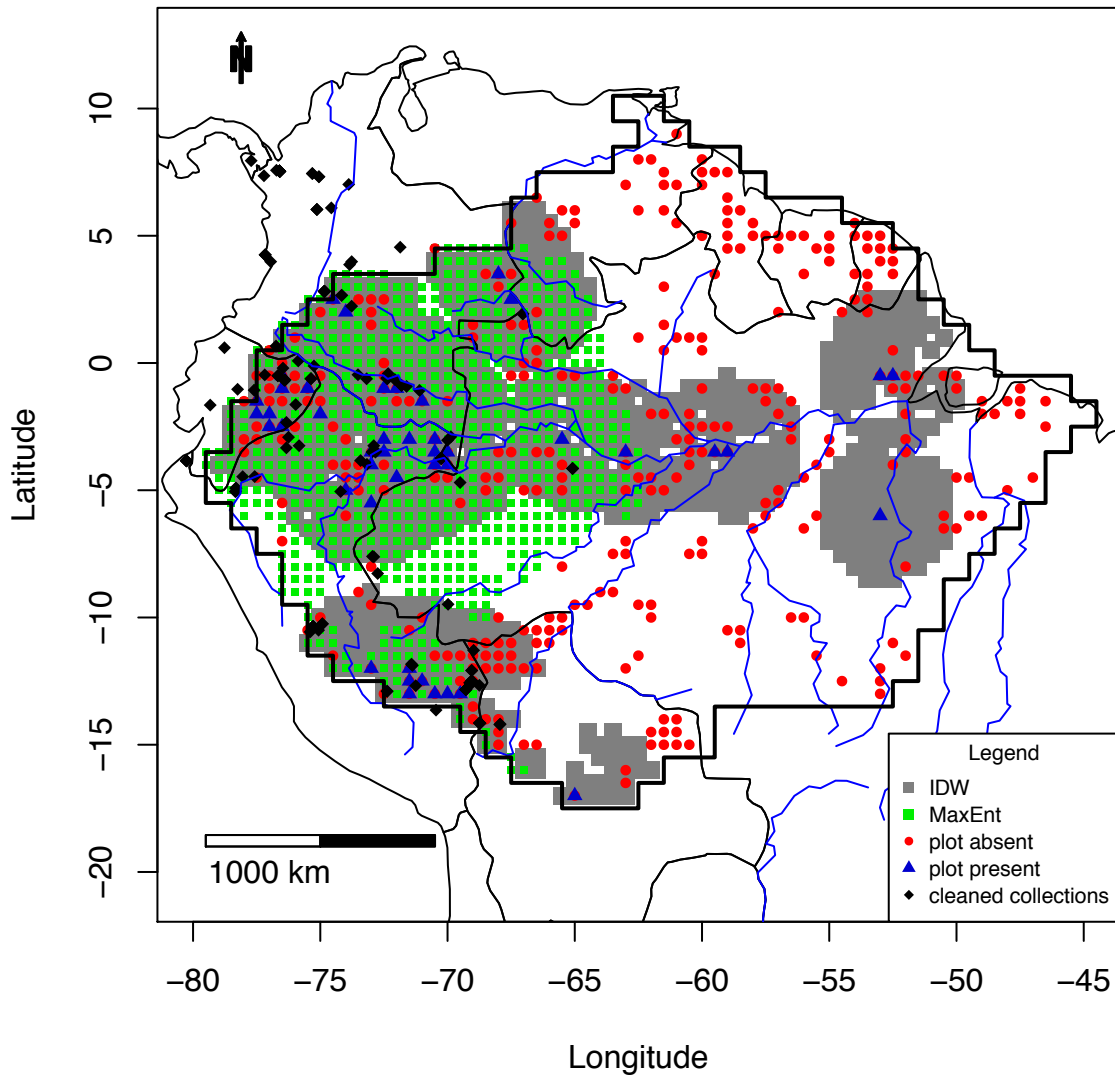

Figure S3\_22B MaxEnt map of *Cecropia\_membranacea*

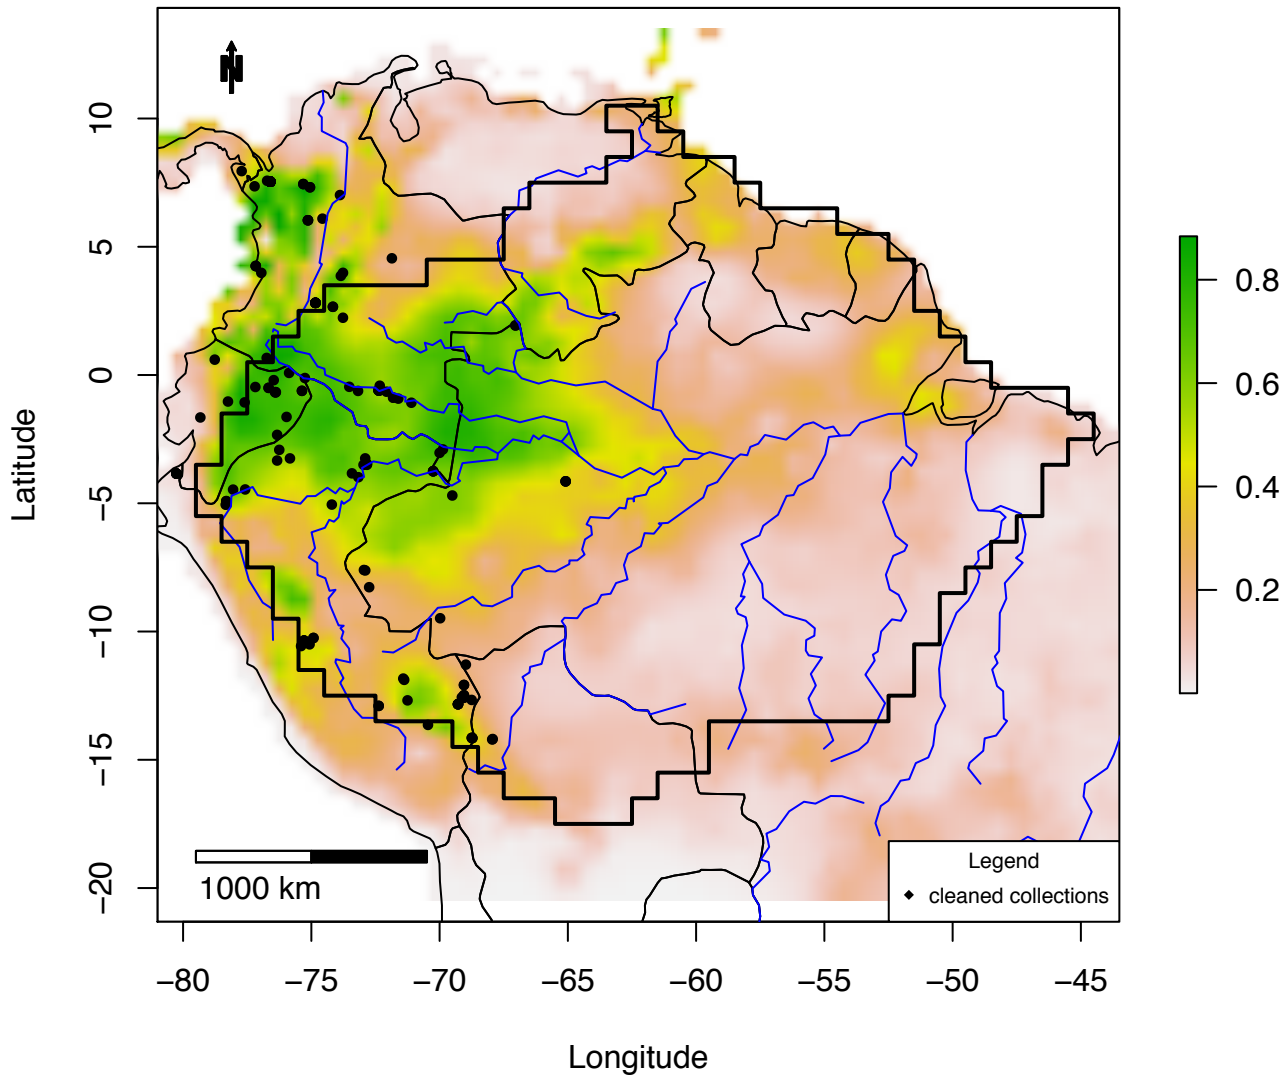

**Figure S3\_22C IDW map of *Cecropia membranacea*:**  
plots =0 – 0.41; IDW: 0 – 0.03

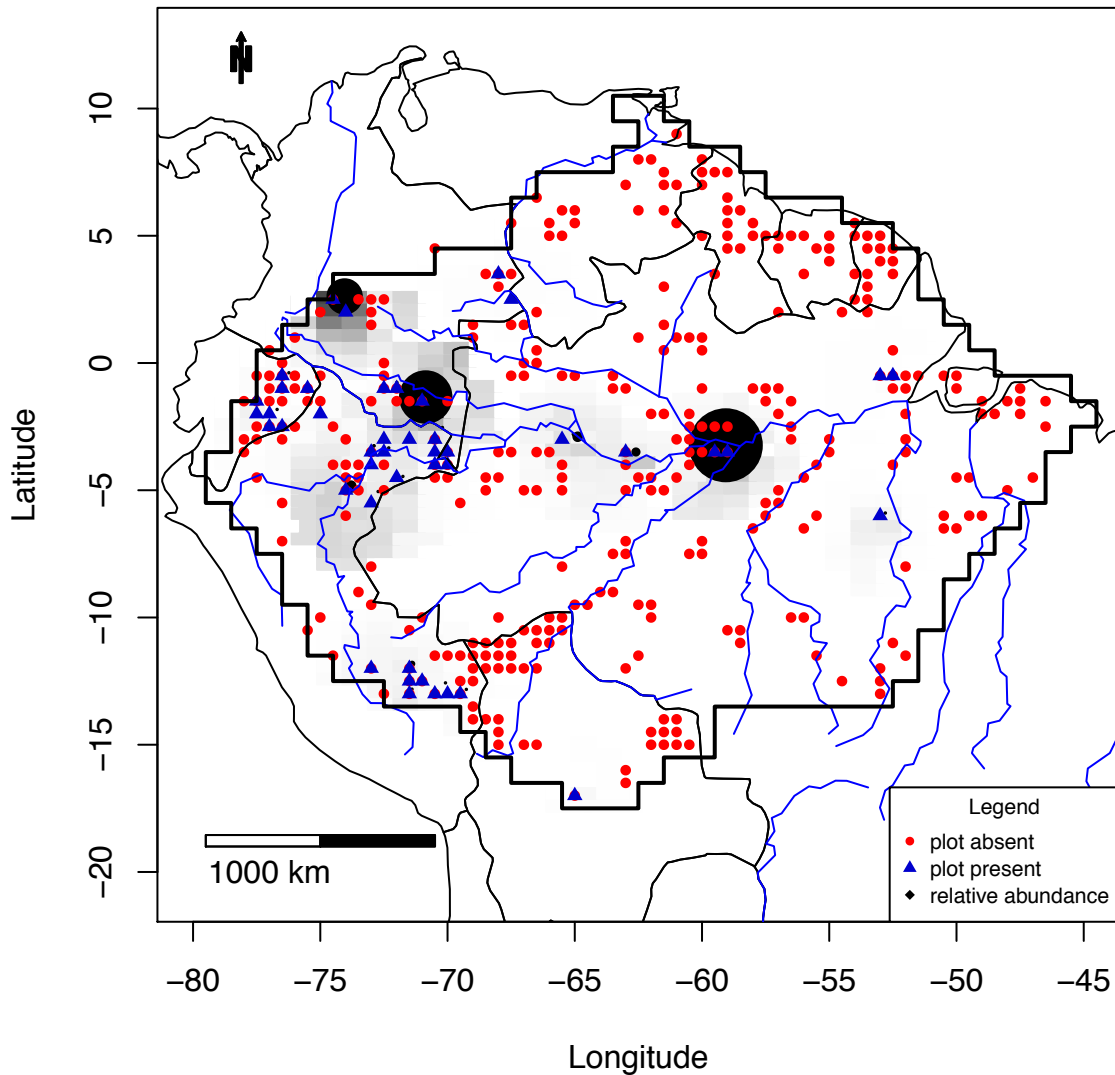

Figure S3\_23A Combined map of *Cecropia\_sciadophylla*

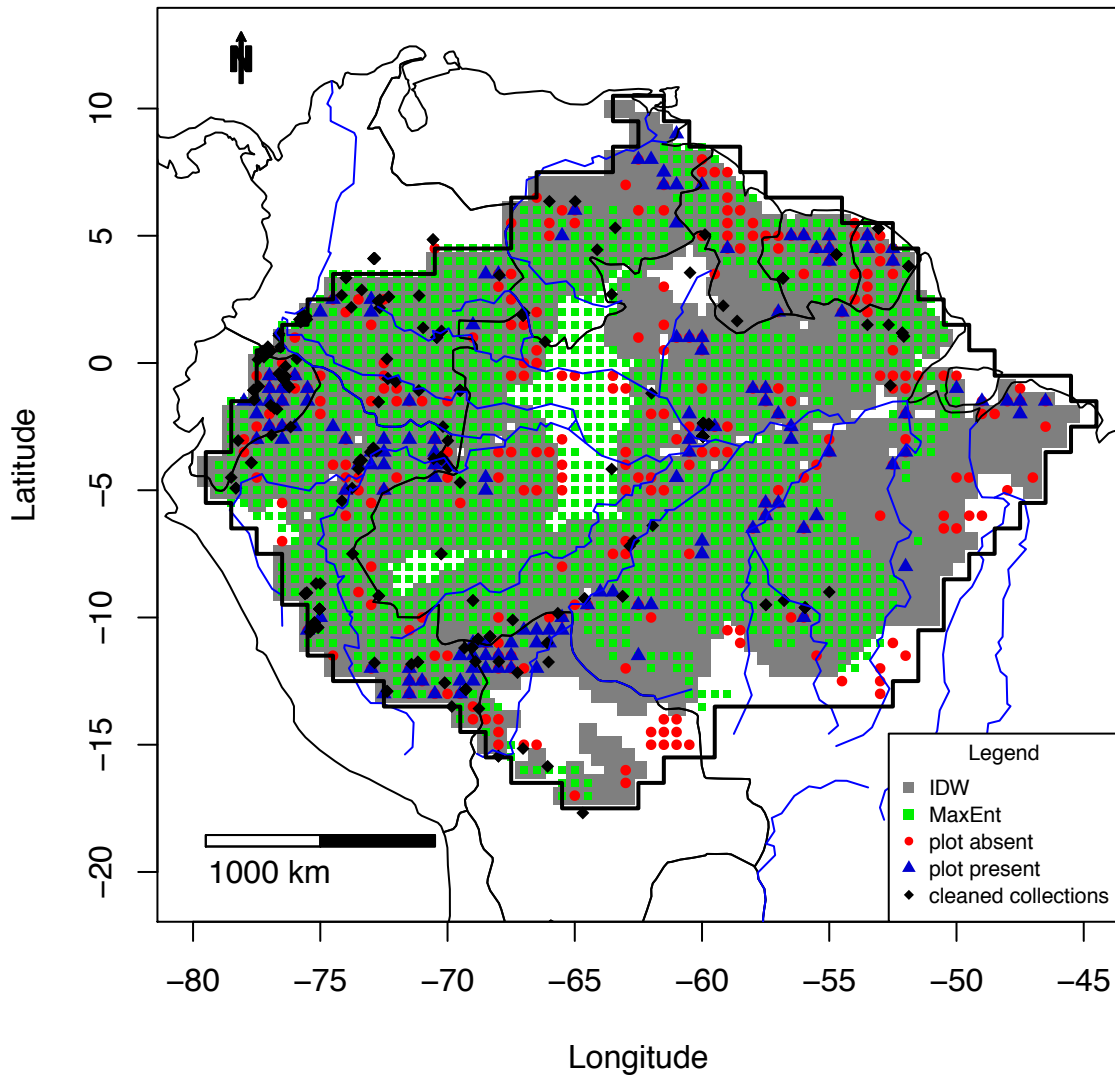

Figure S3\_23B MaxEnt map of *Cecropia\_sciadophylla*

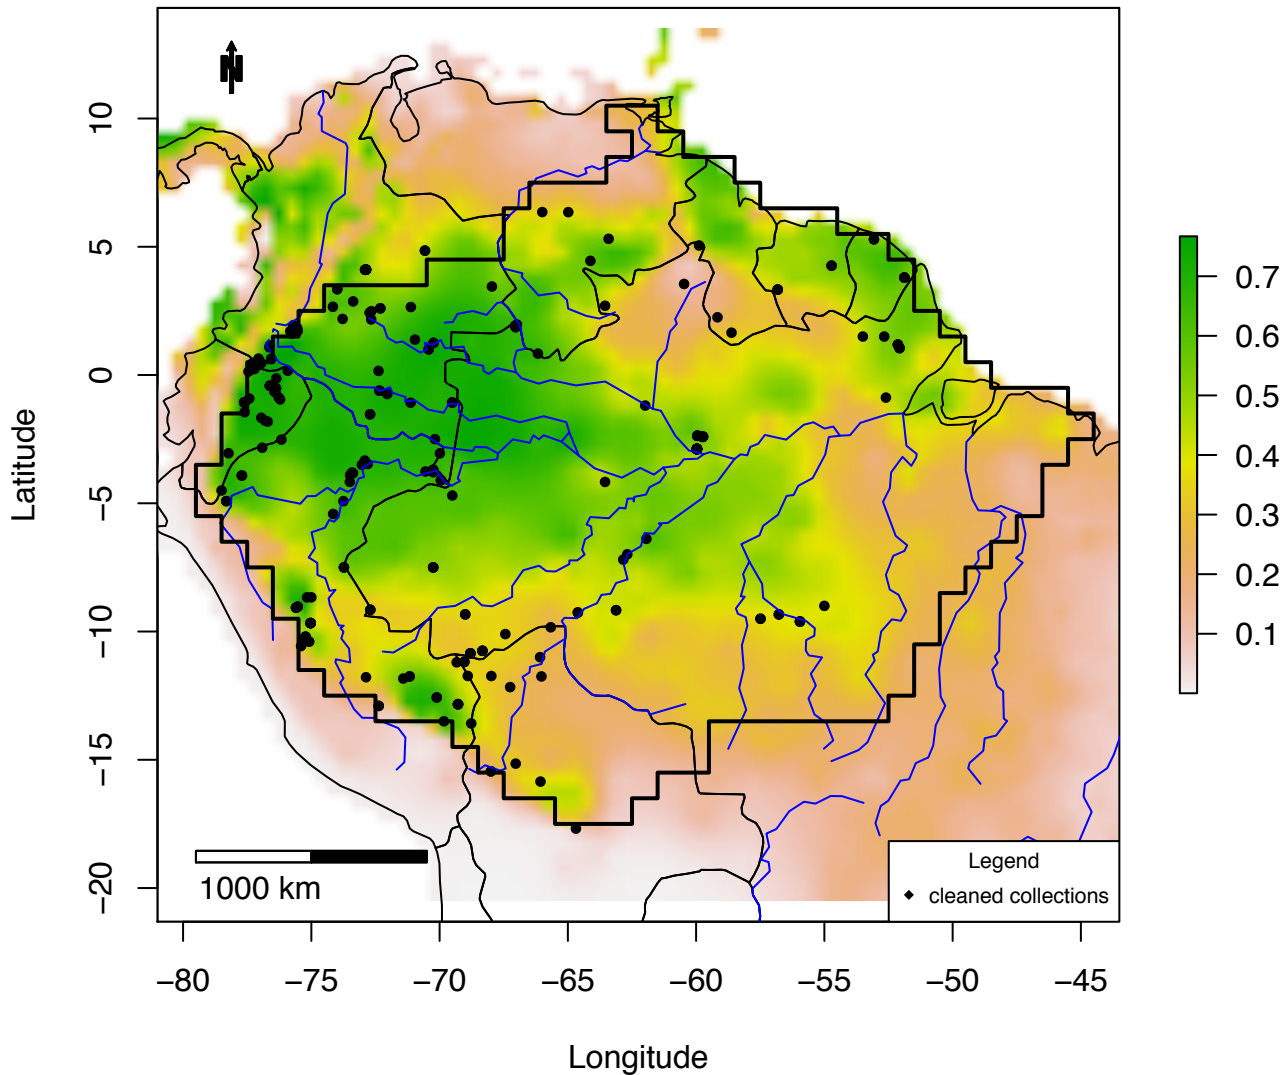

**Figure S3\_23C IDW map of *Cecropia sciadophylla*:**  
**plots =0 – 0.21; IDW: 0 – 0.1**

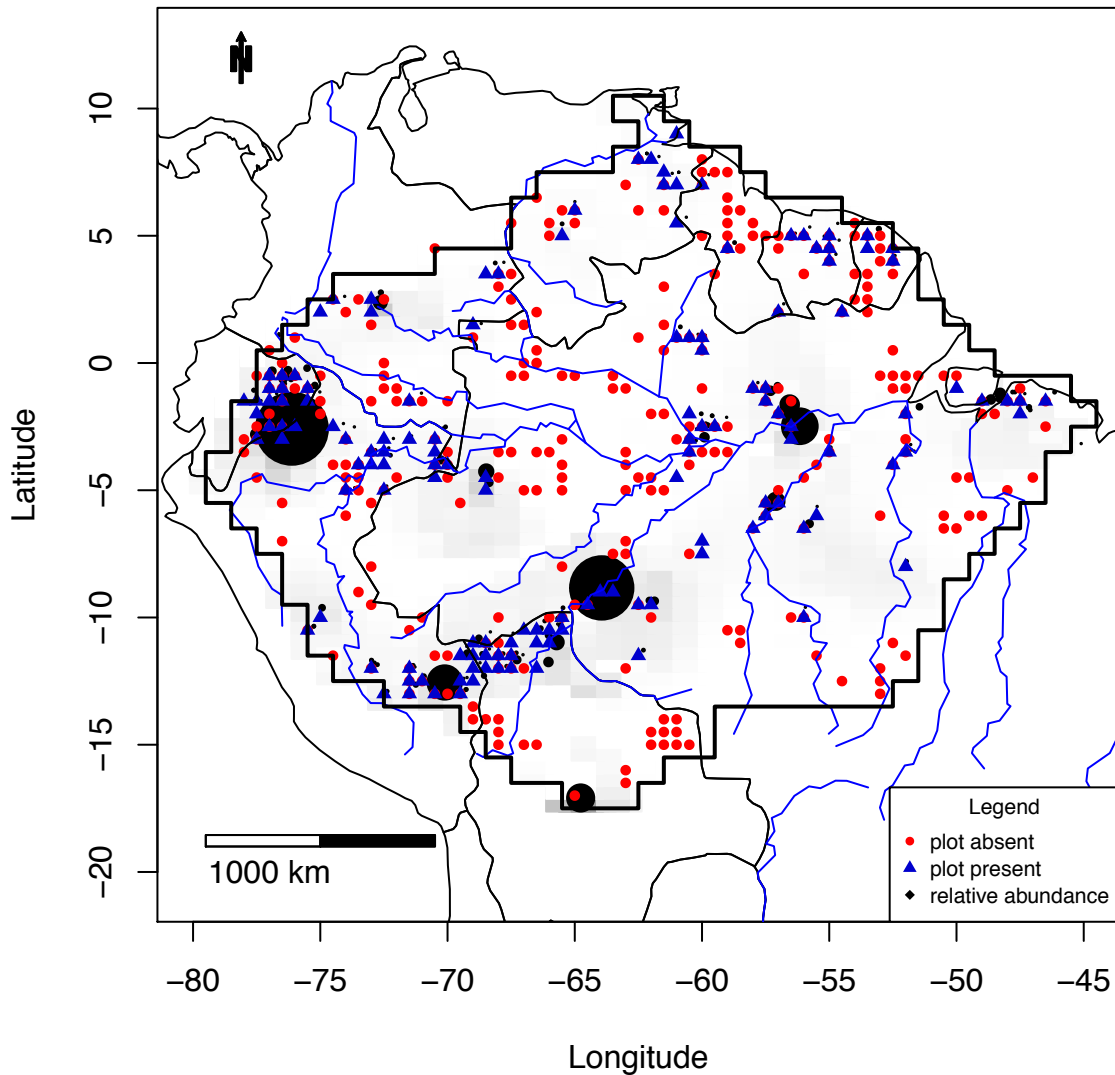

Figure S3\_24A Combined map of *Cedrelinga\_cateniformis*

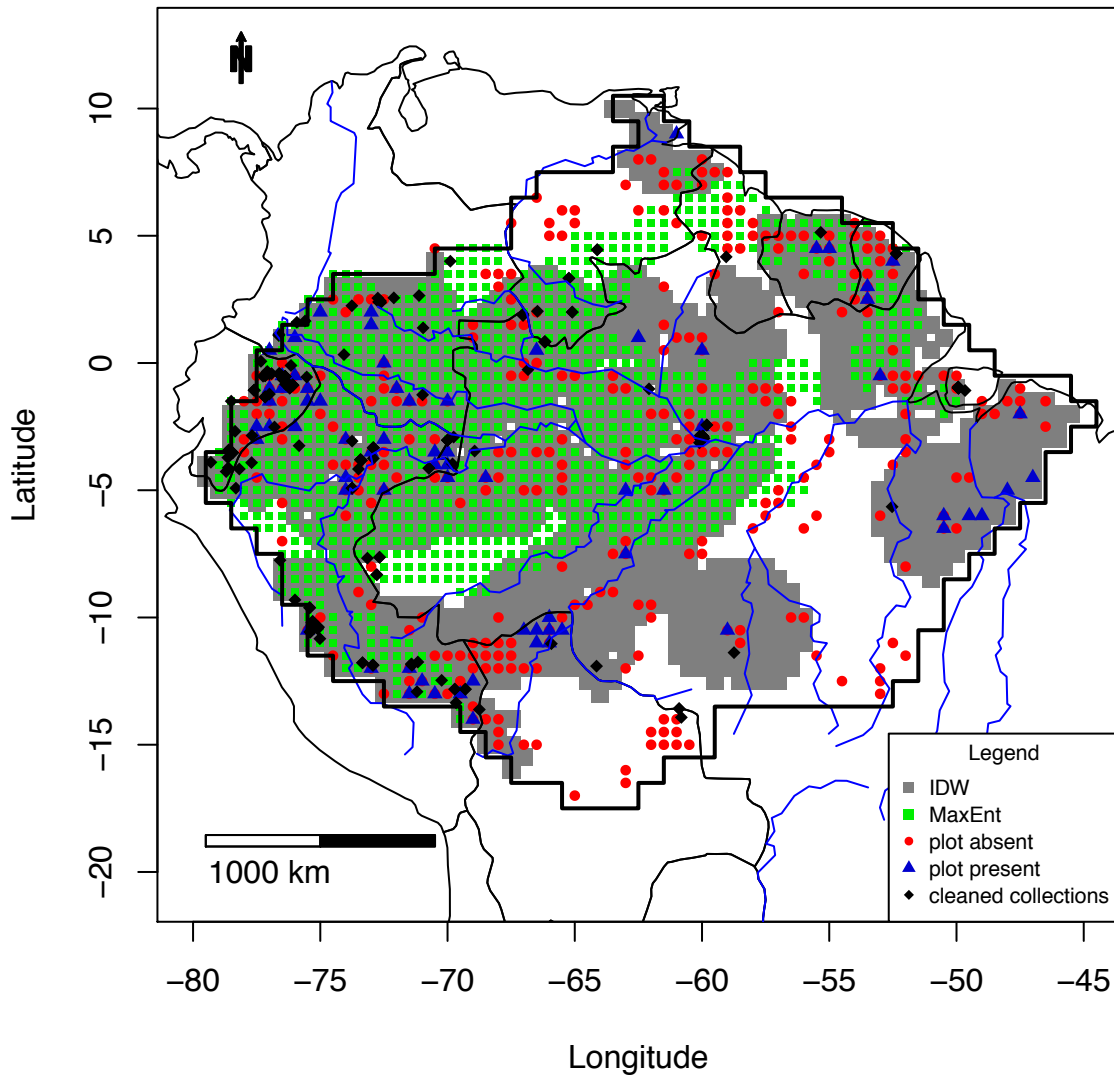

Figure S3\_24B MaxEnt map of *Cedrelinga\_cateniformis*

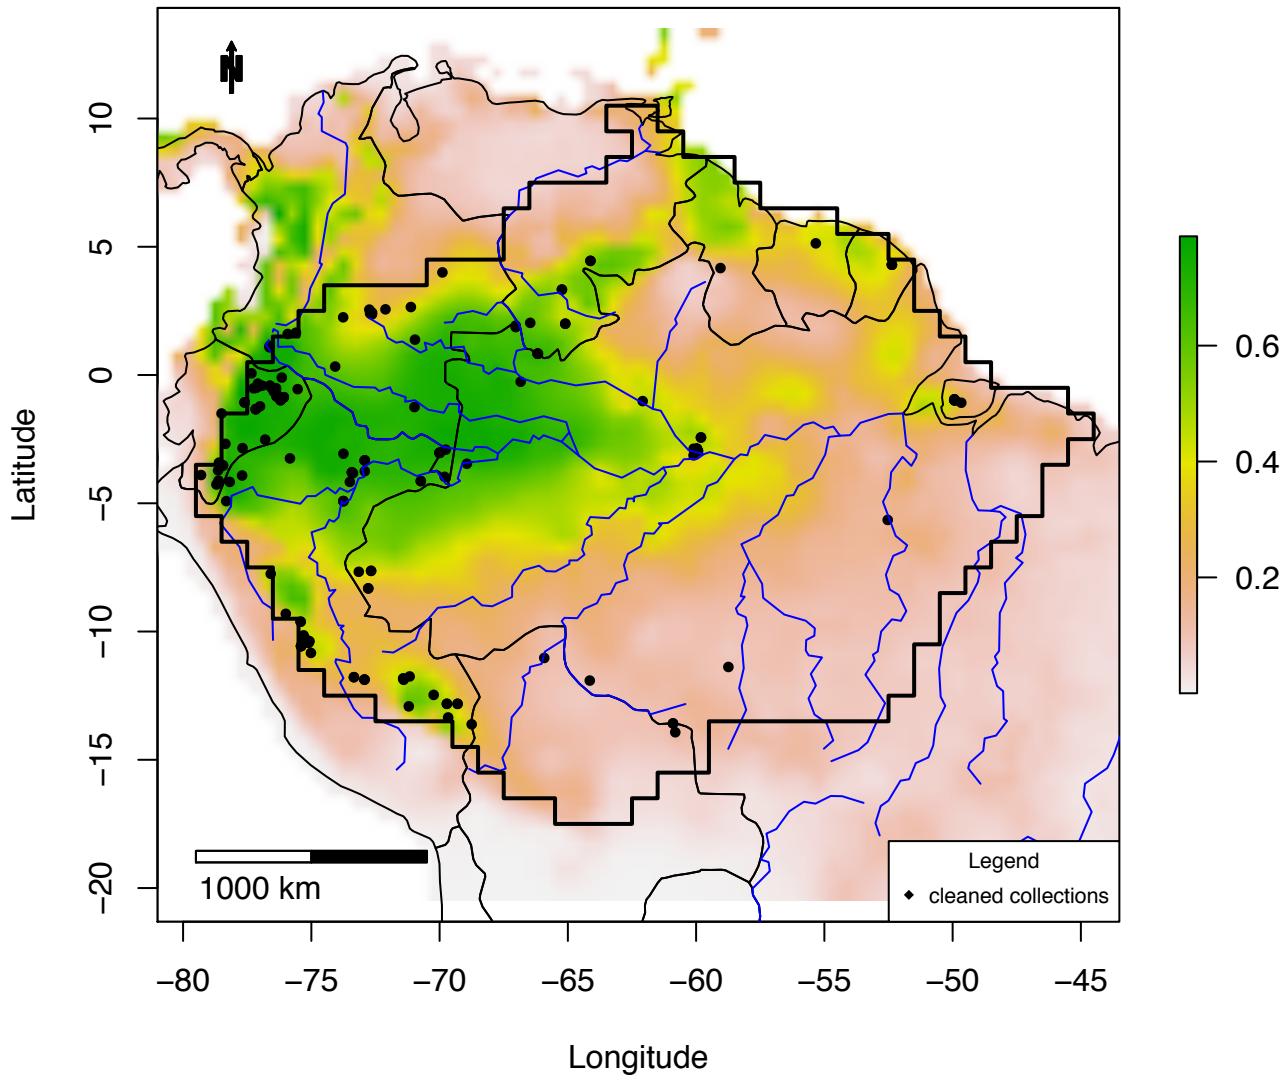



Figure S3\_24C IDW map of *Cedrelinga cateniformis*:  
plots =0 – 0.09; IDW: 0 – 0.05

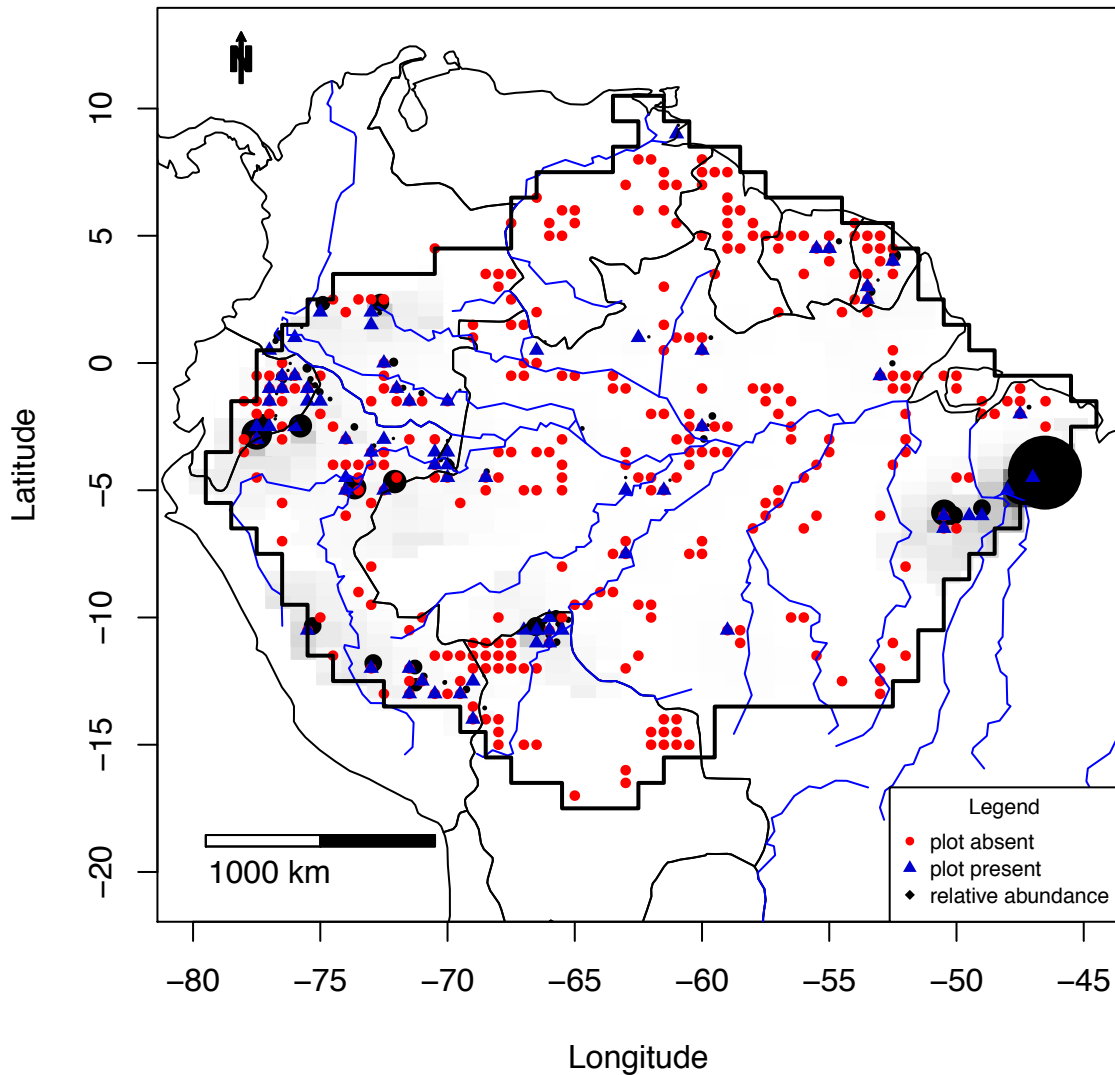

Figure S3\_25A Combined map of *Celtis schippii*

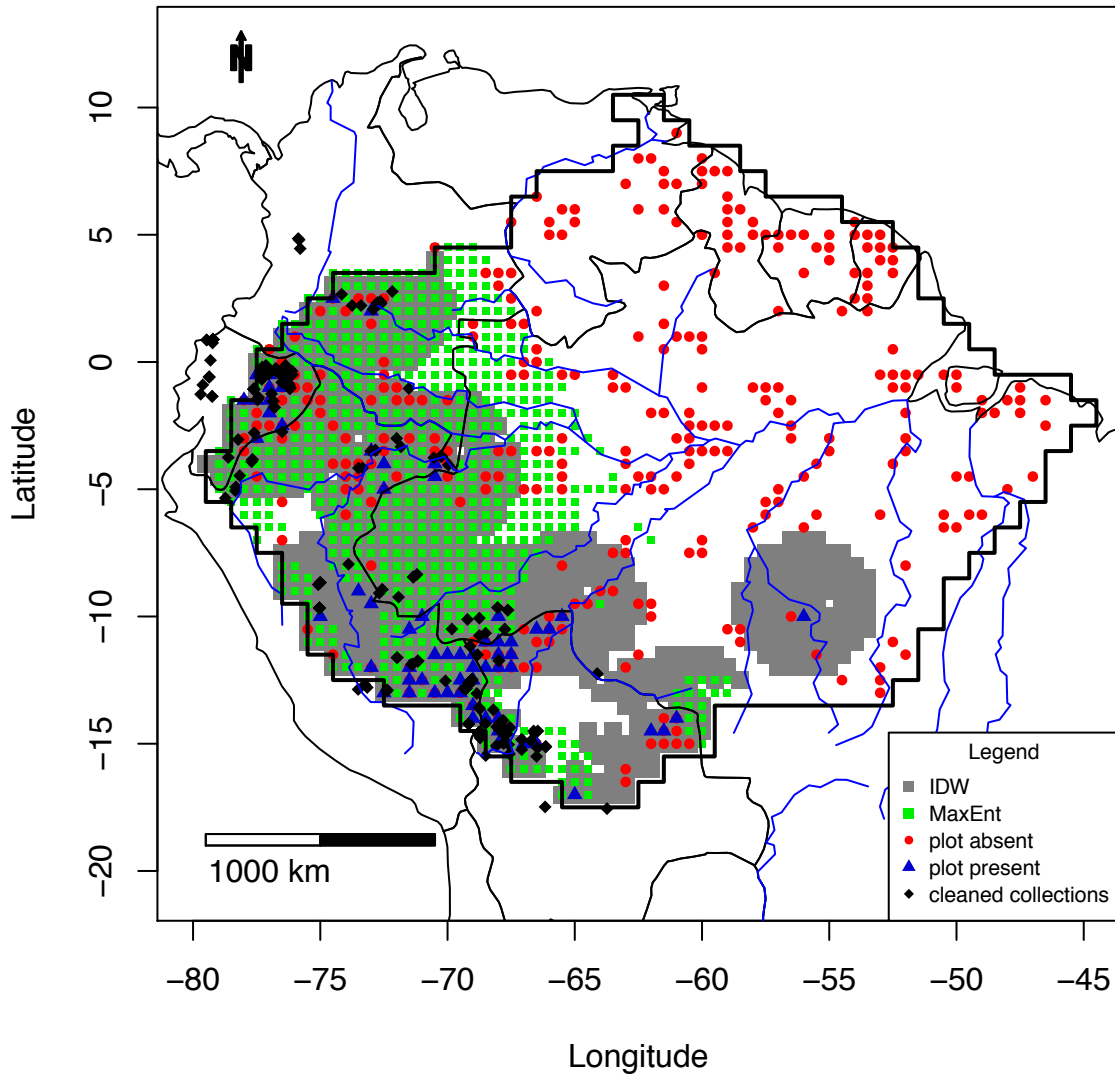

Figure S3\_25B MaxEnt map of *Celtis schippii*

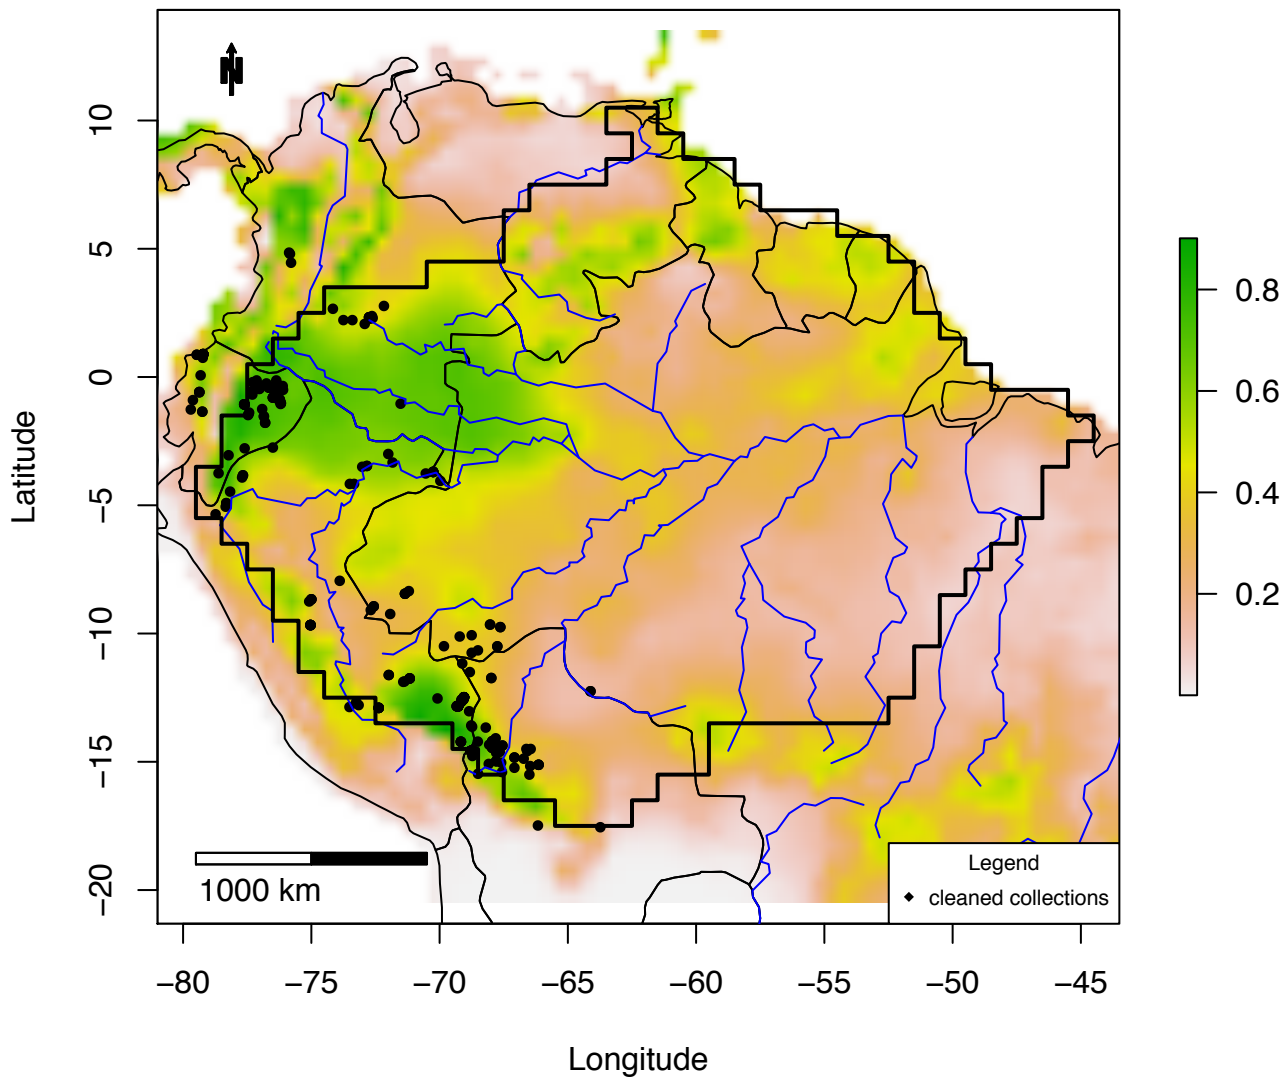

**Figure S3\_25C IDW map of *Celtis schippii*:**  
**plots =0 – 0.11; IDW: 0 – 0.03**

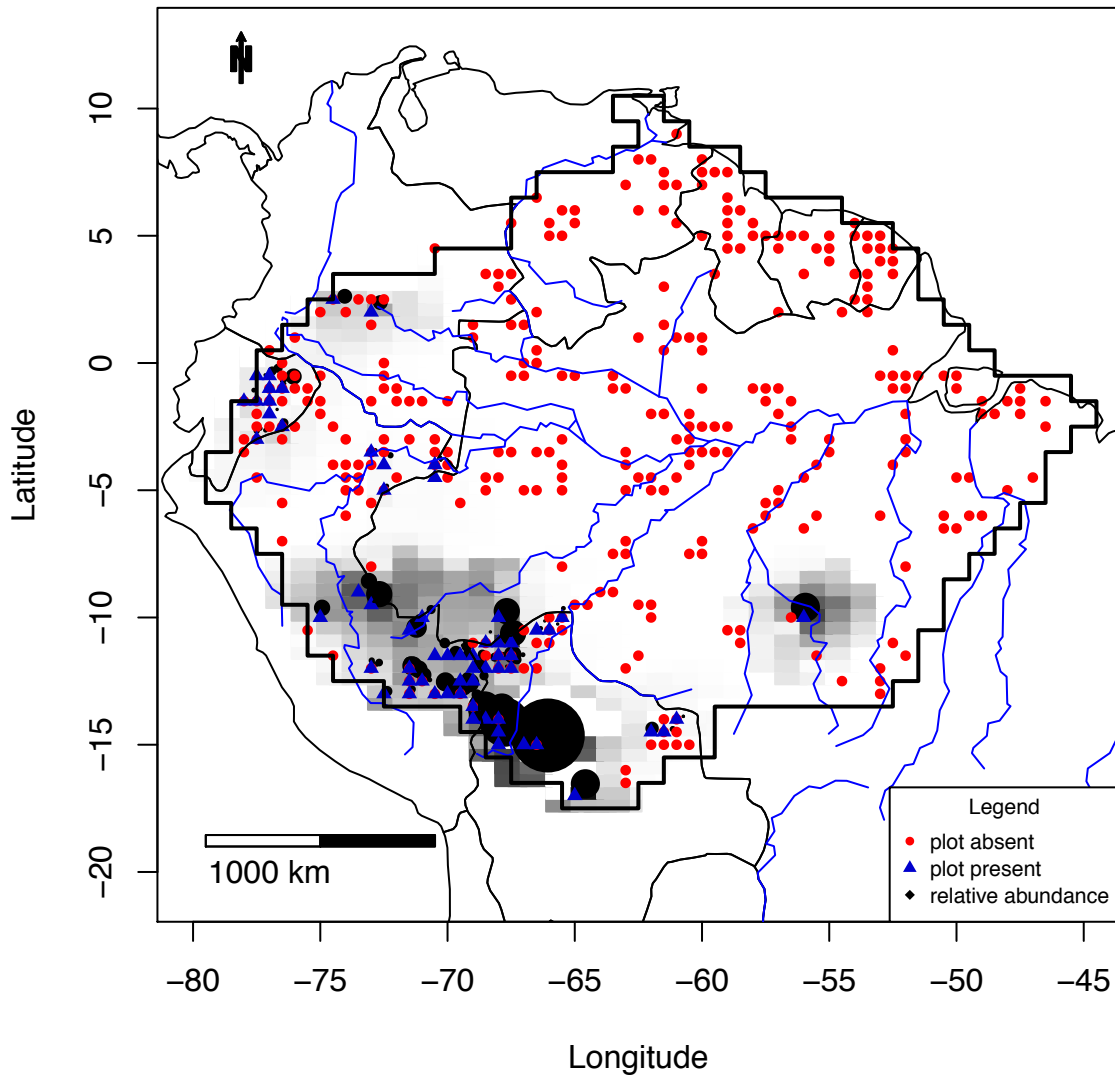

Figure S3\_26A Combined map of *Cenostigma\_tocantinum*

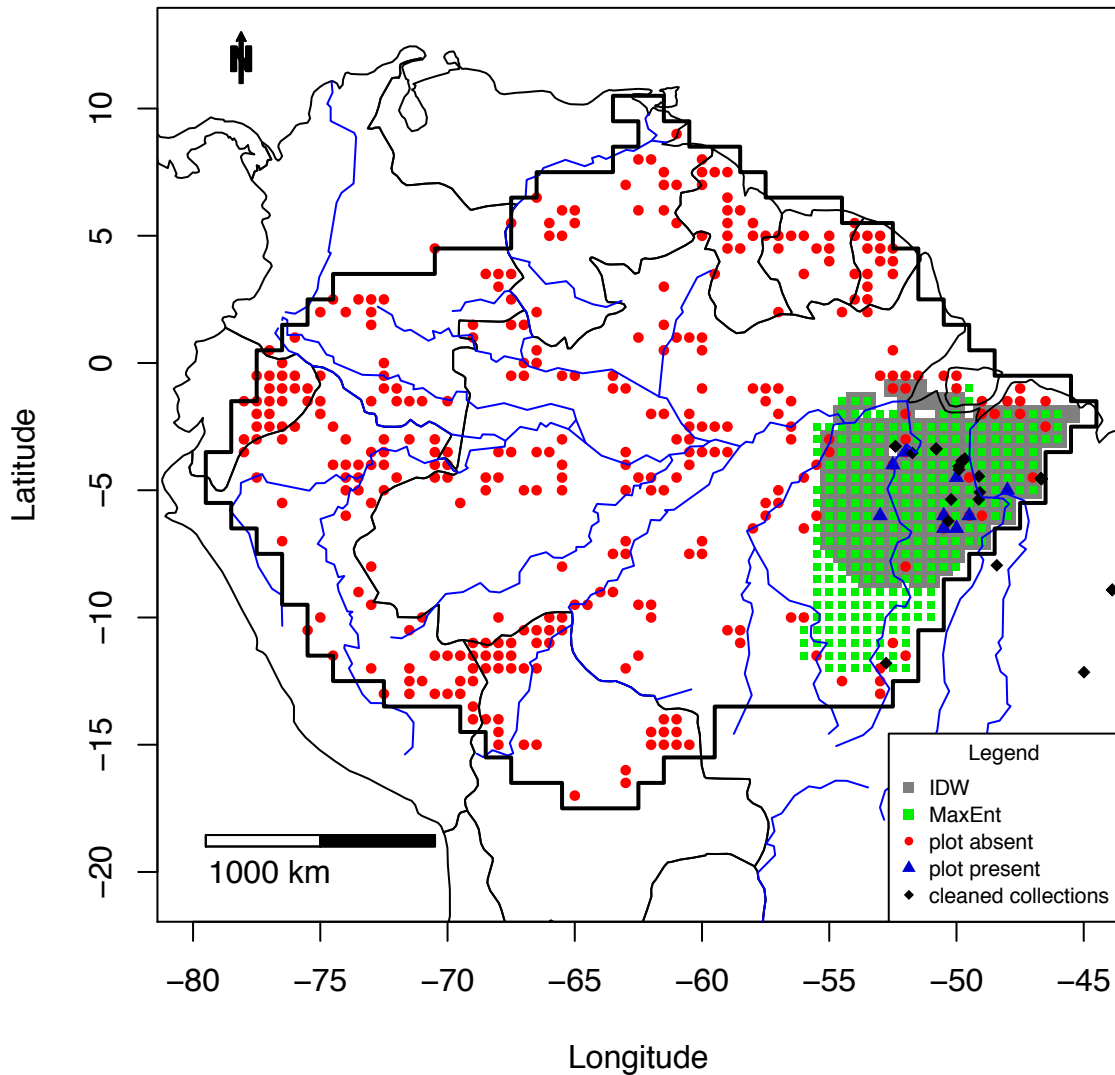

Figure S3\_26B MaxEnt map of *Cenostigma\_tocantinum*

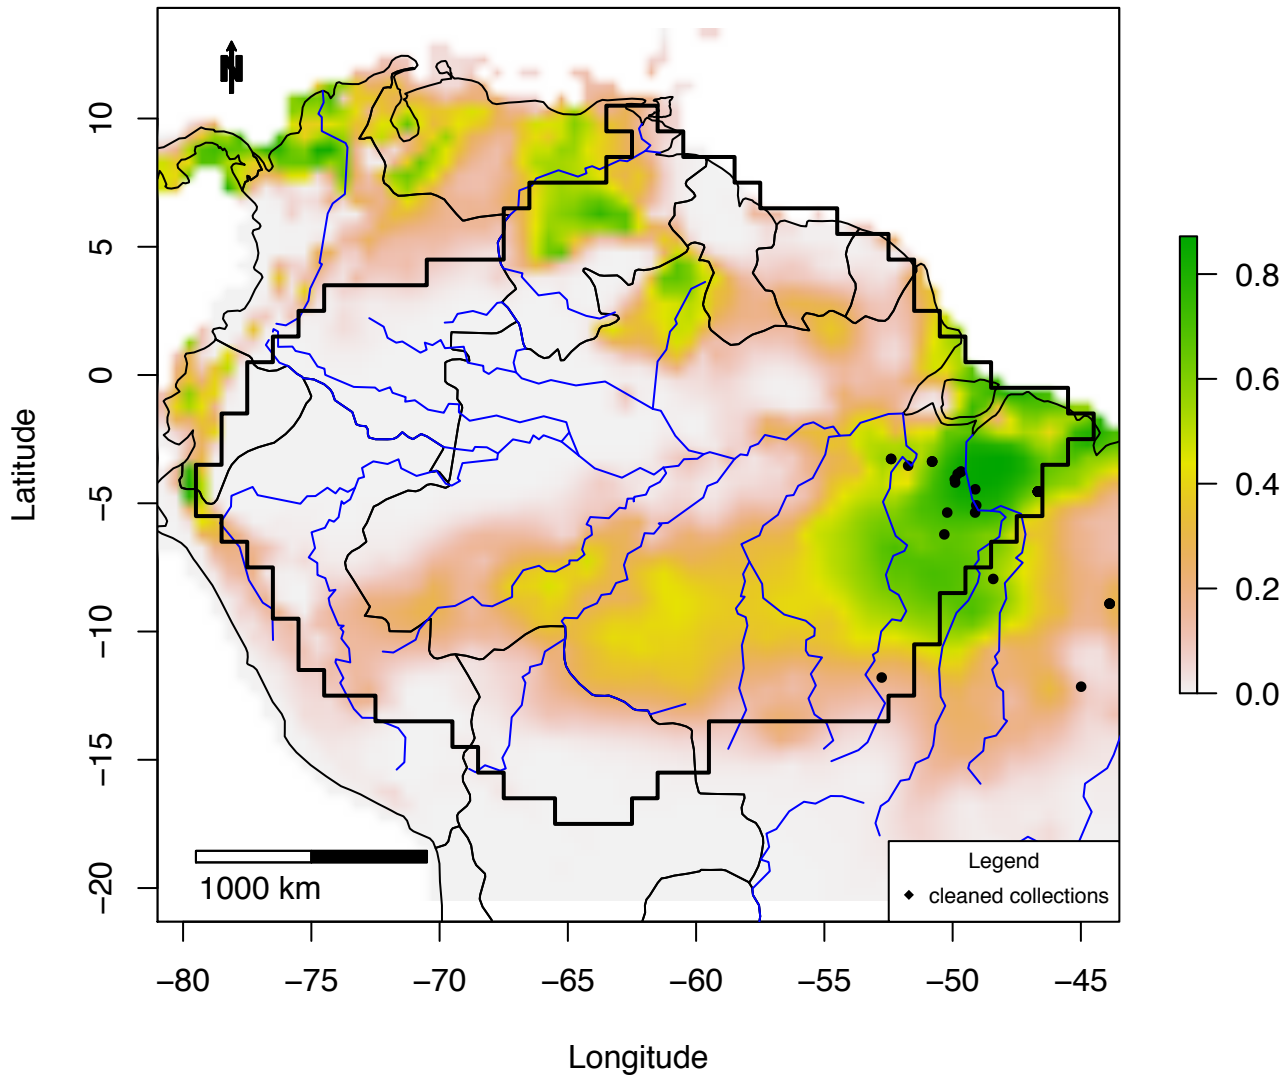

Figure S3\_26C IDW map of *Cenostigma tocantinum*:  
plots = 0 – 0.35; IDW: 0 – 0.15

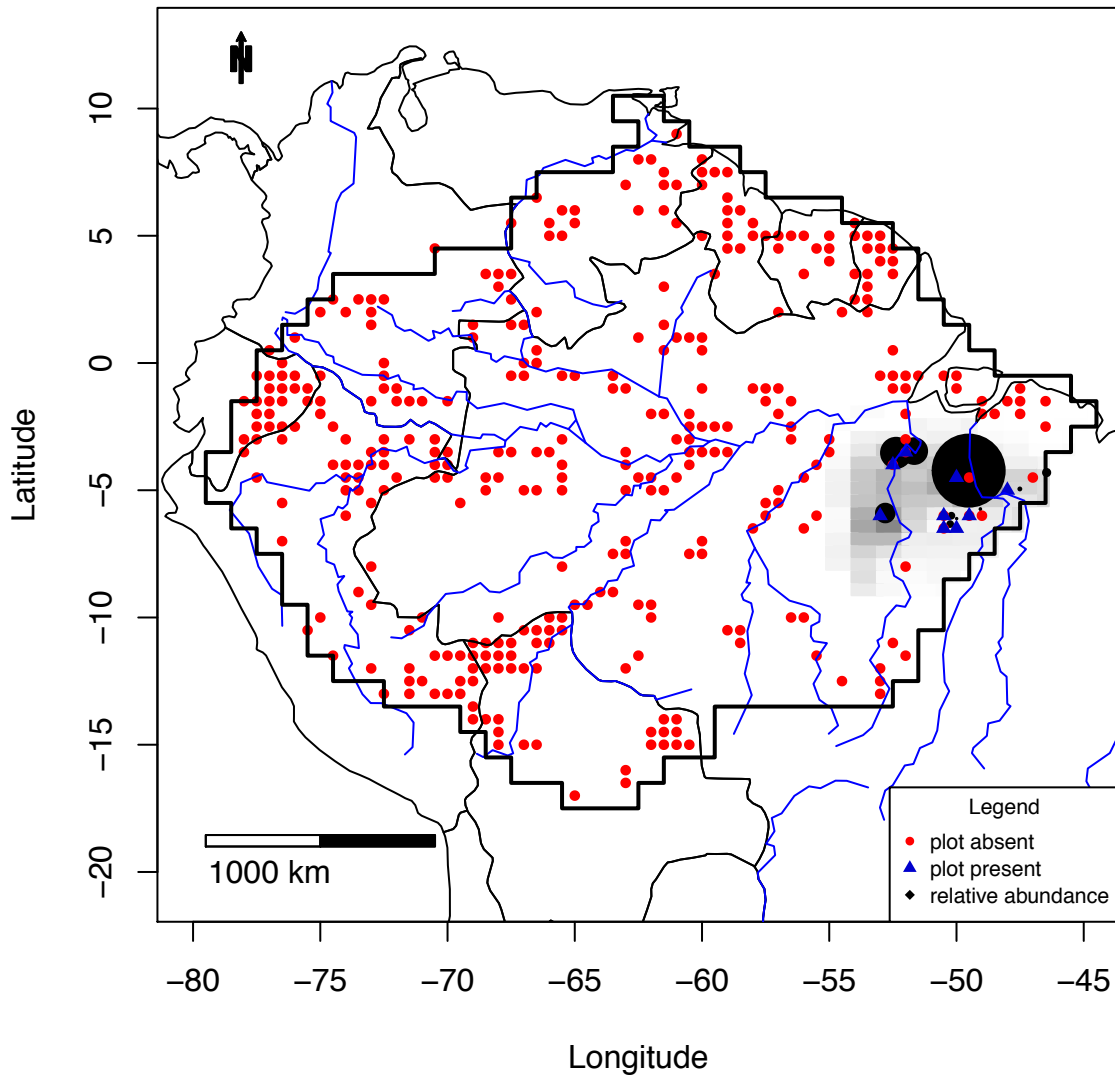

Figure S3\_27A Combined map of *Chlorocardium\_rodiei*

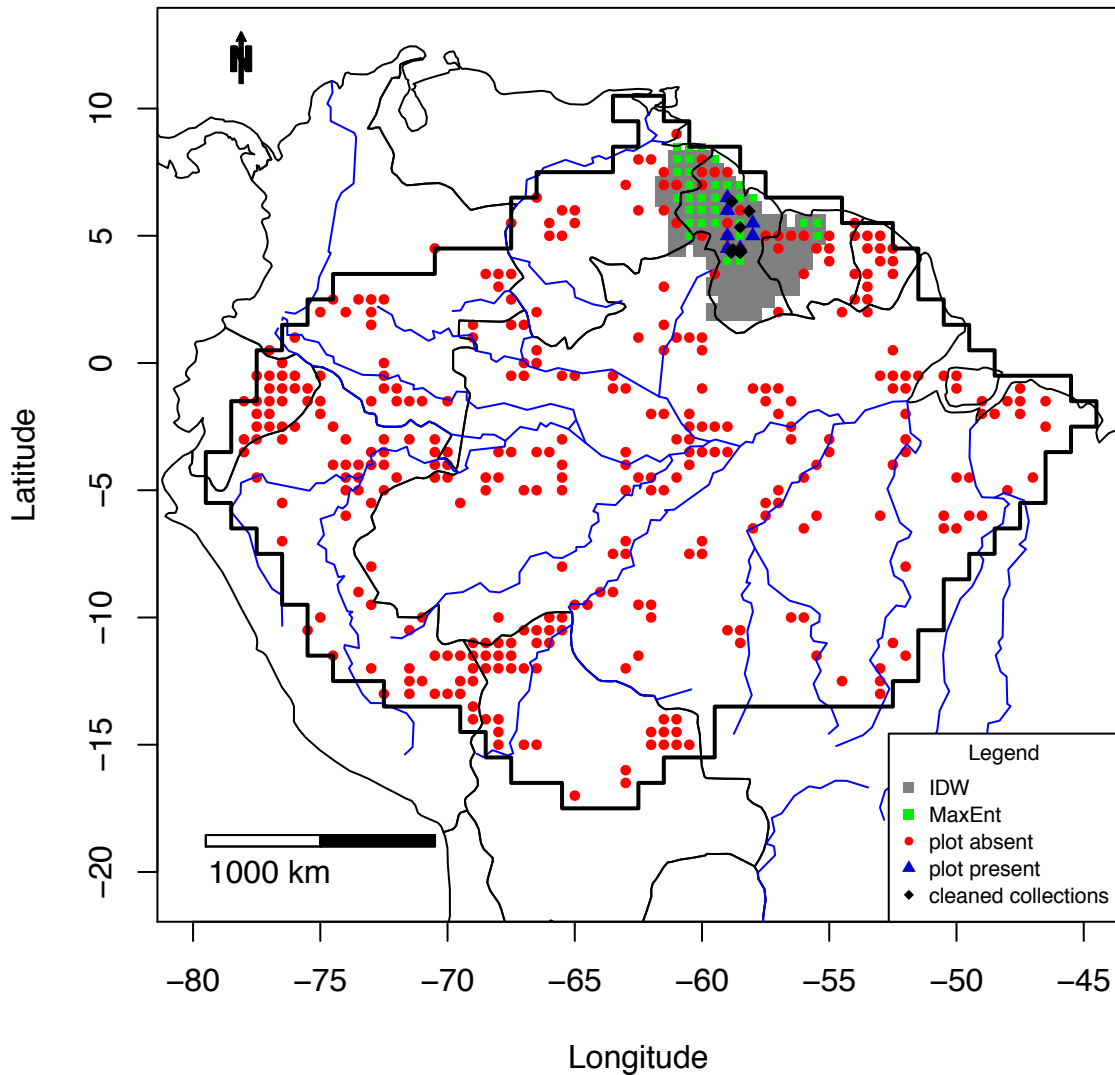



Figure S3\_27B MaxEnt map of *Chlorocardium\_rodiei*

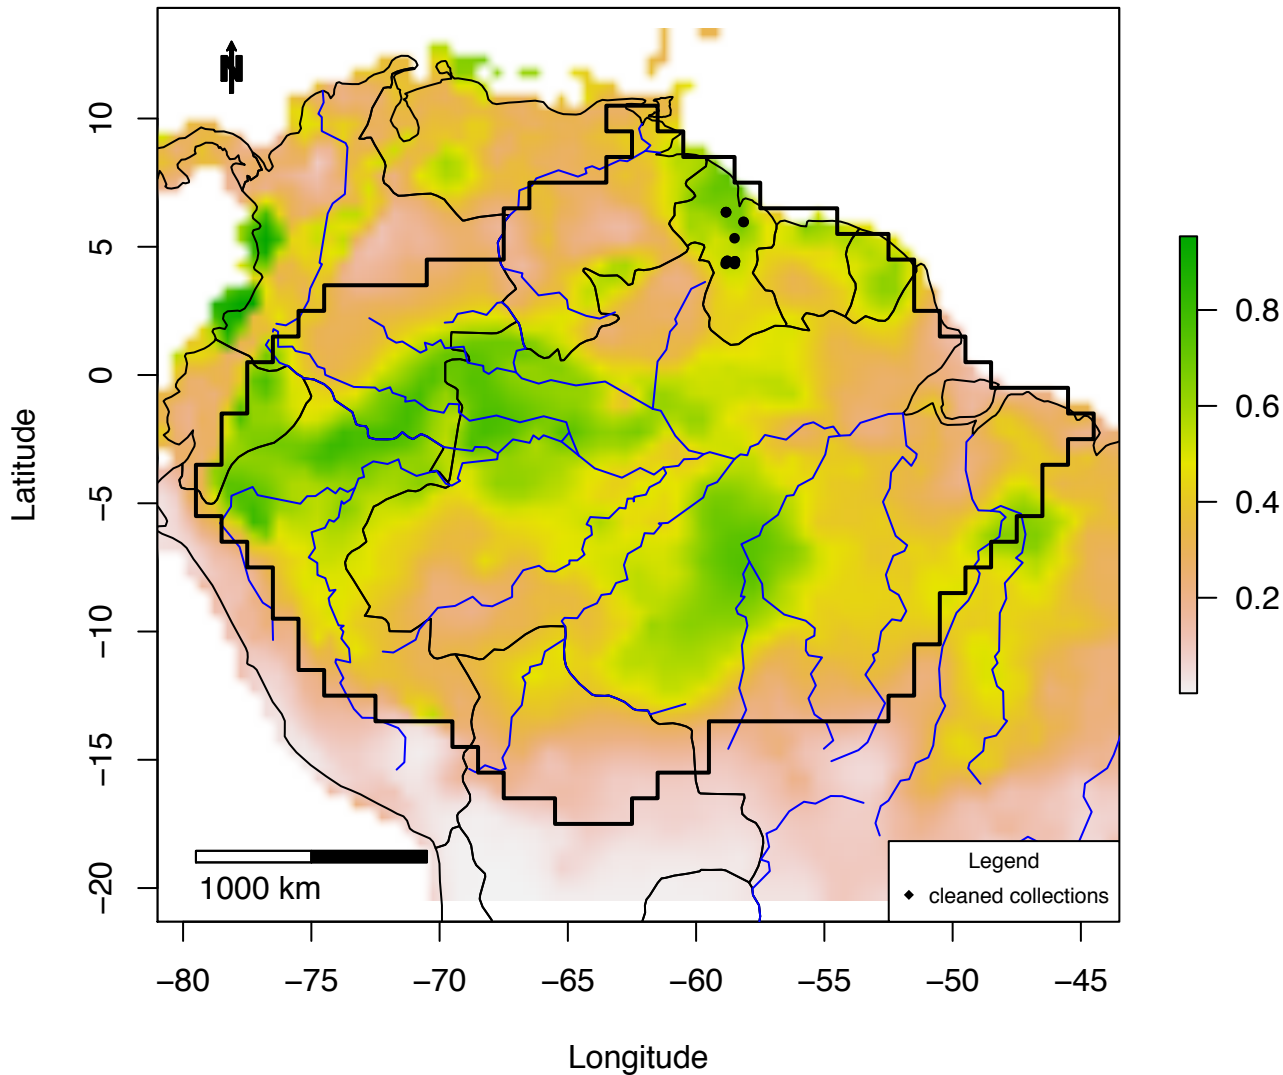

**Figure S3\_27C IDW map of *Chlorocardium rodiei*:  
plots =0 – 0.22; IDW: 0 – 0.08**

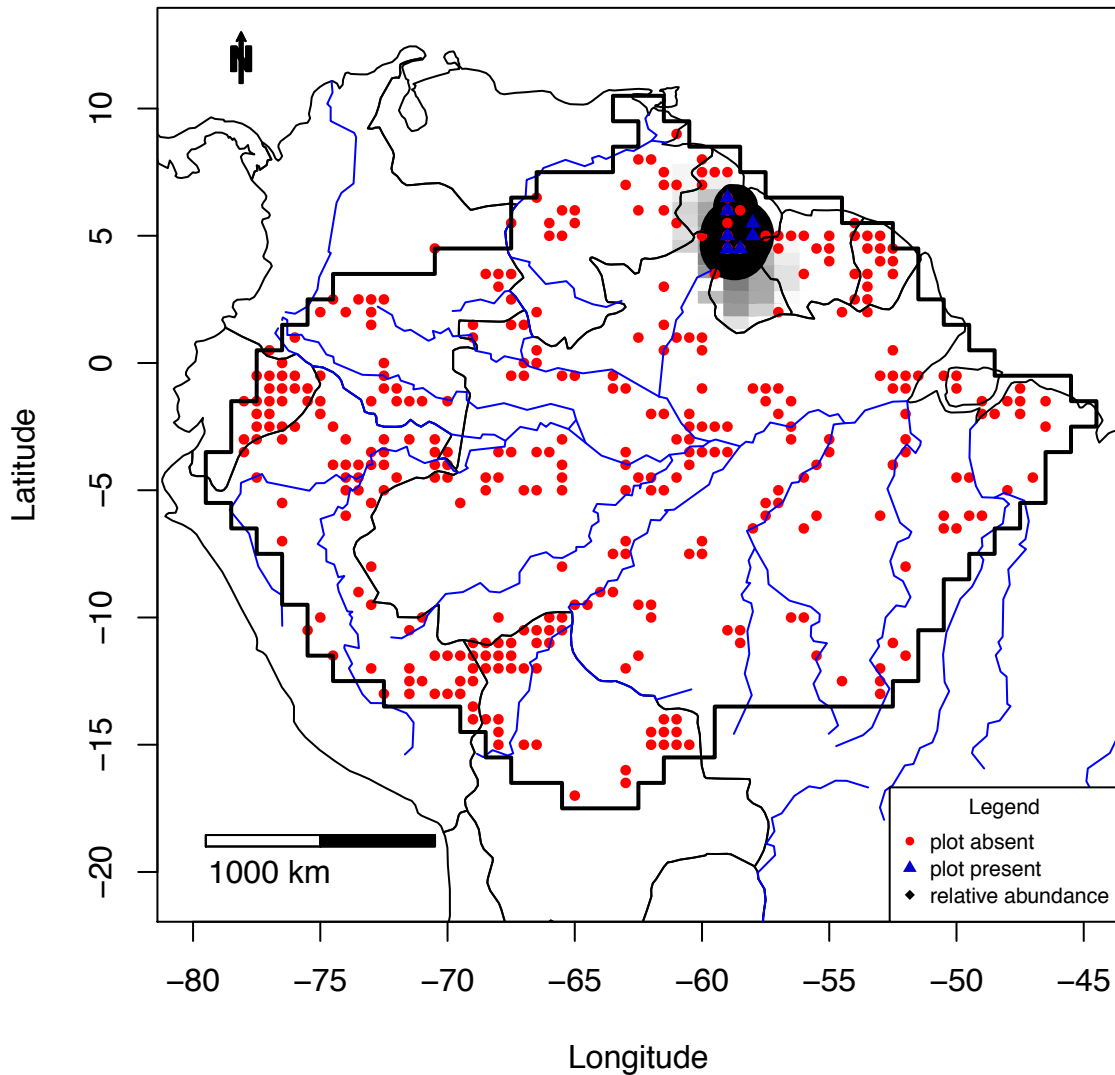

Figure S3\_28A Combined map of *Chrysophyllum\_sanguinolentum*

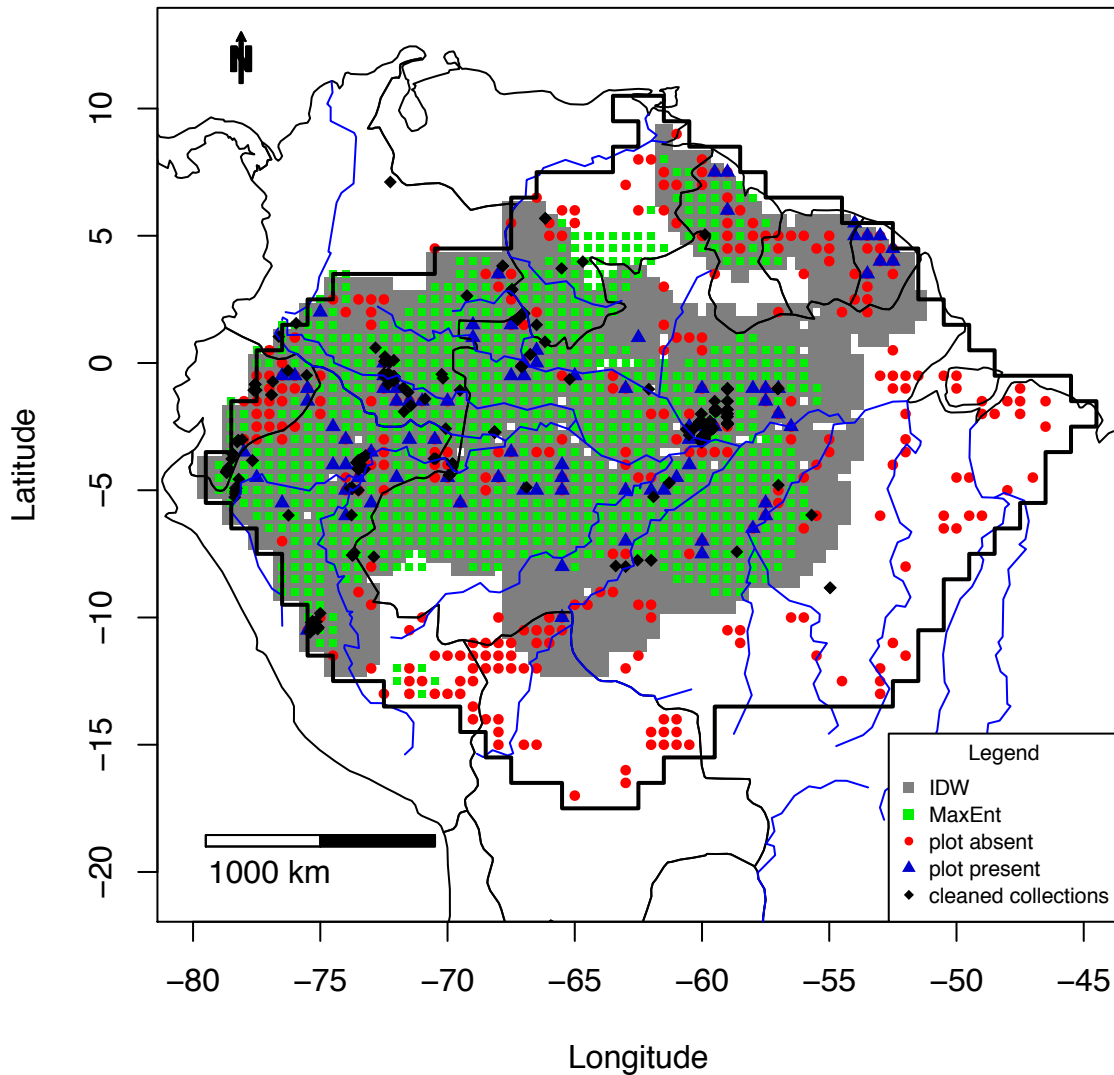

Figure S3\_28B MaxEnt map of *Chrysophyllum\_sanguinolentum*

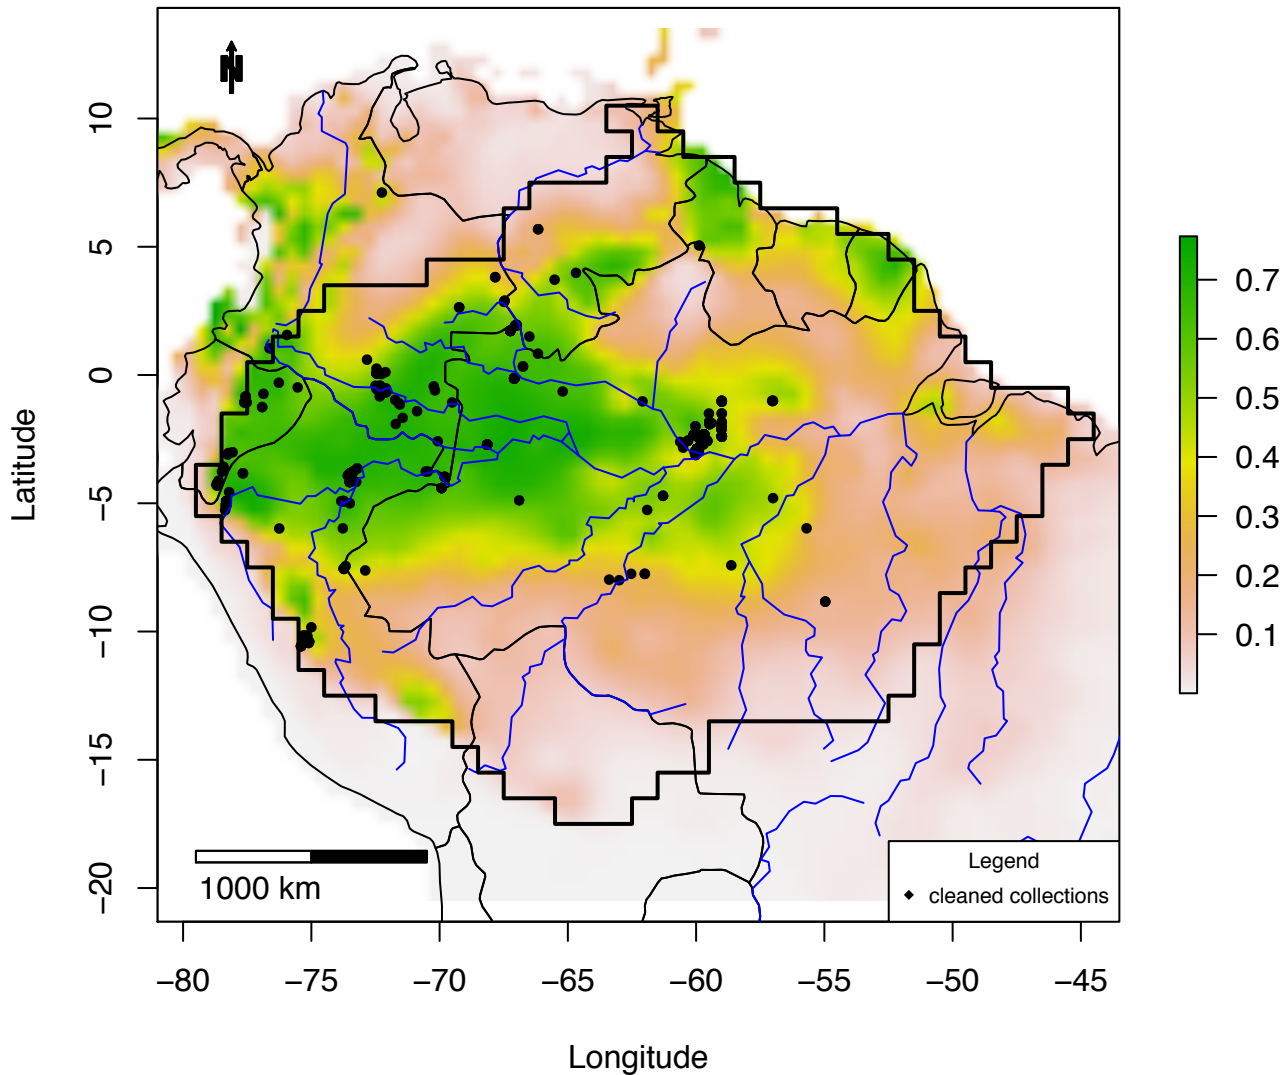

Figure S3\_28C IDW map of *Chrysophyllum\_sanguinolentum*:  
plots =0 – 0.2; IDW: 0 – 0.1

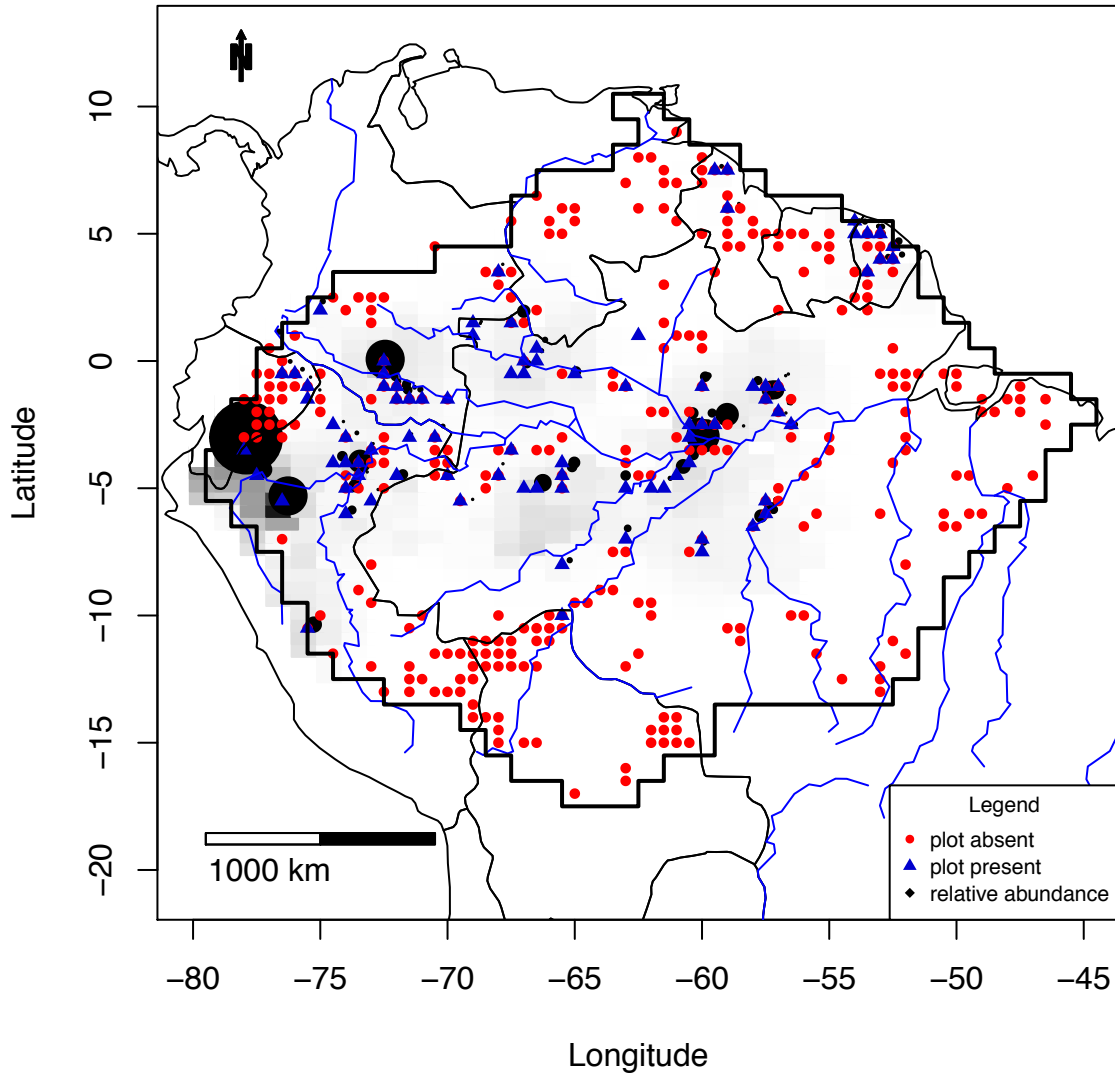

Figure S3\_29A Combined map of *Clarisia\_racemosa*

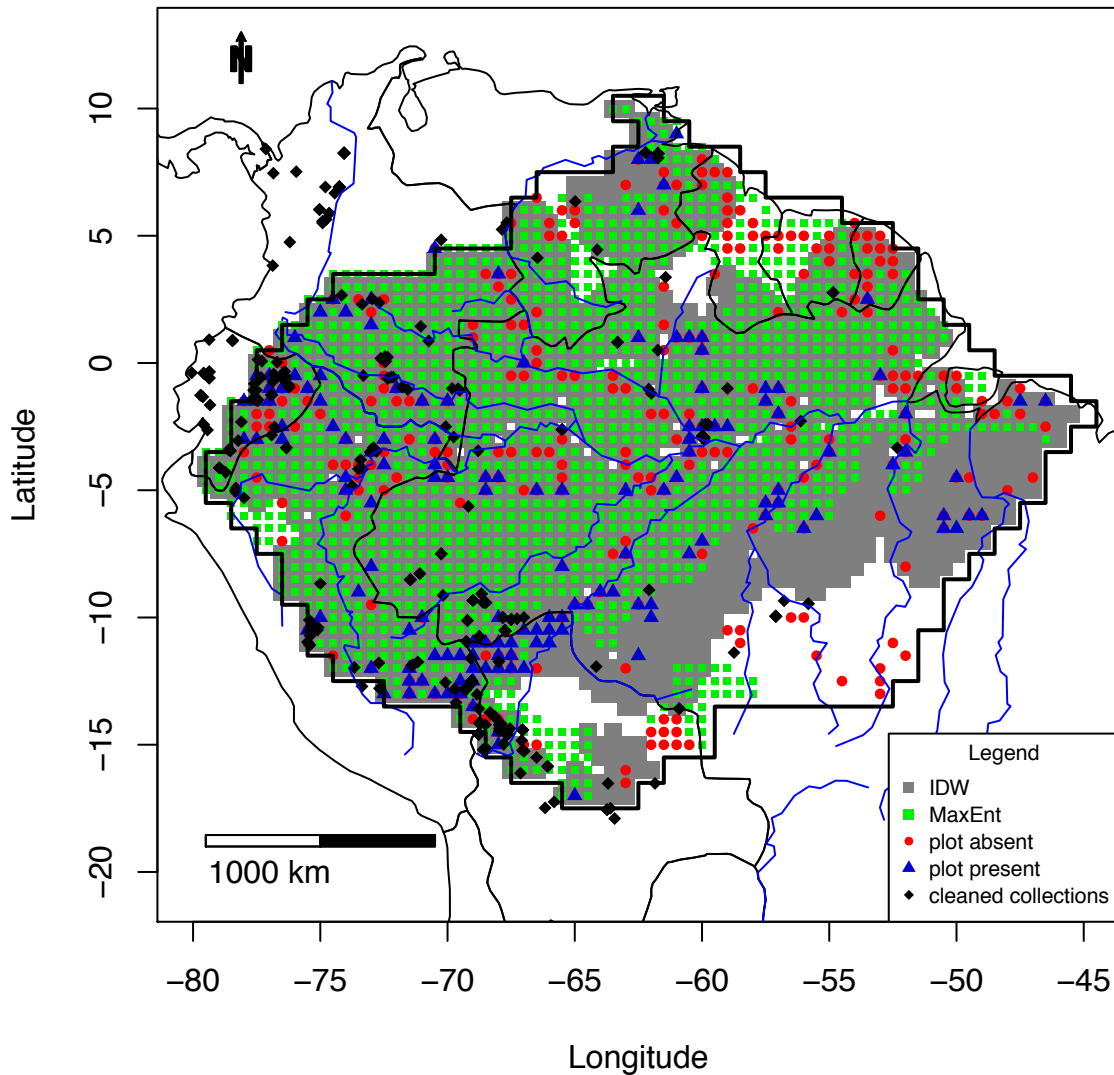

Figure S3\_29B MaxEnt map of *Clarisia\_racemosa*

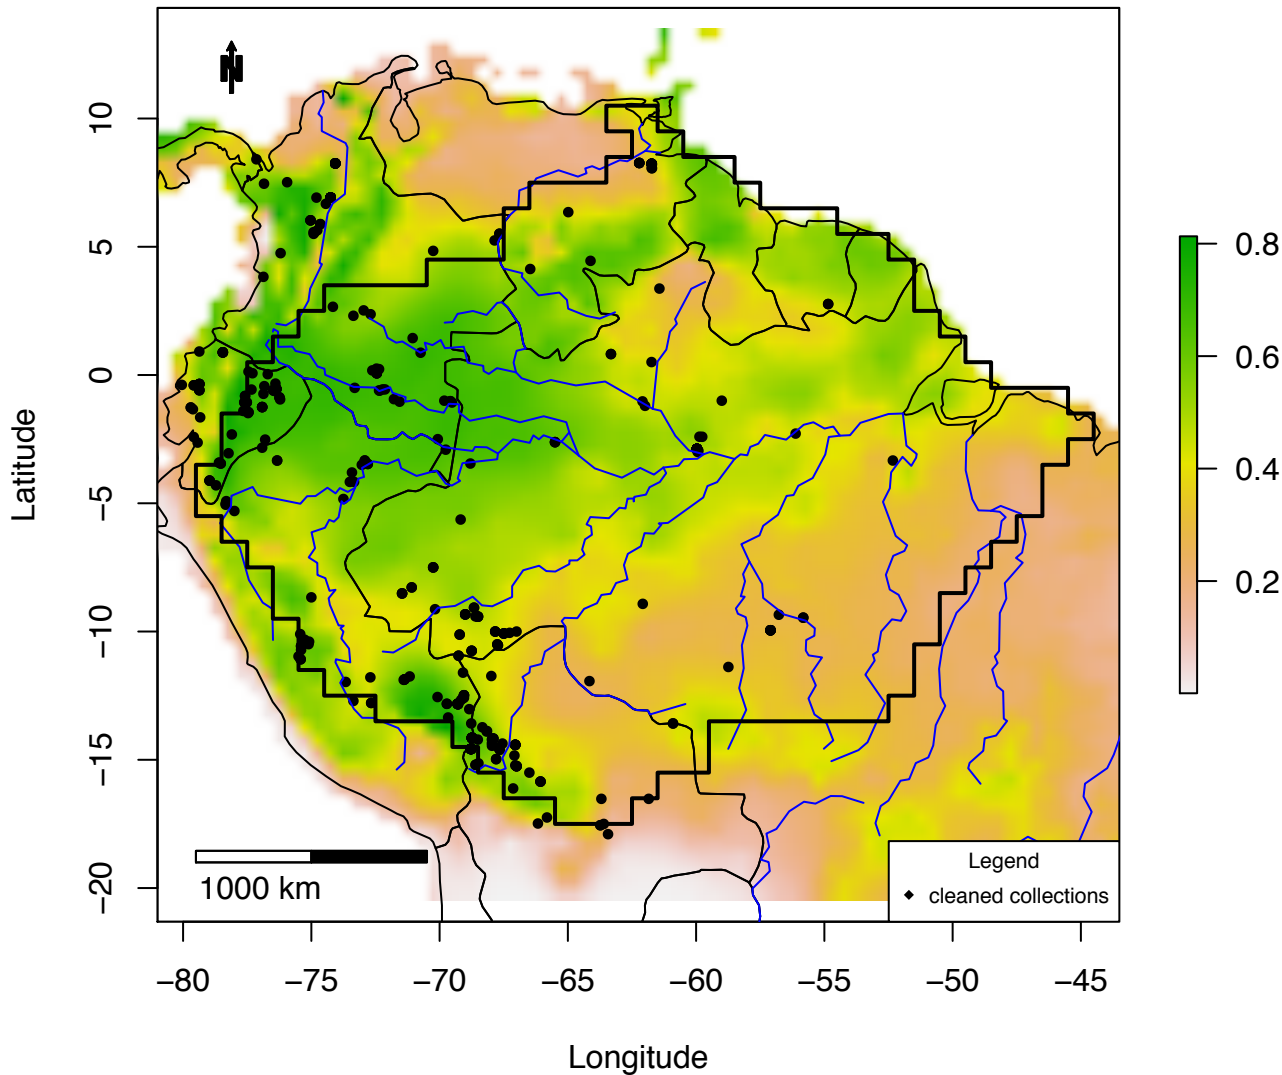

**Figure S3\_29C IDW map of *Clarisia racemosa*:  
plots =0 – 0.04; IDW: 0 – 0.03**

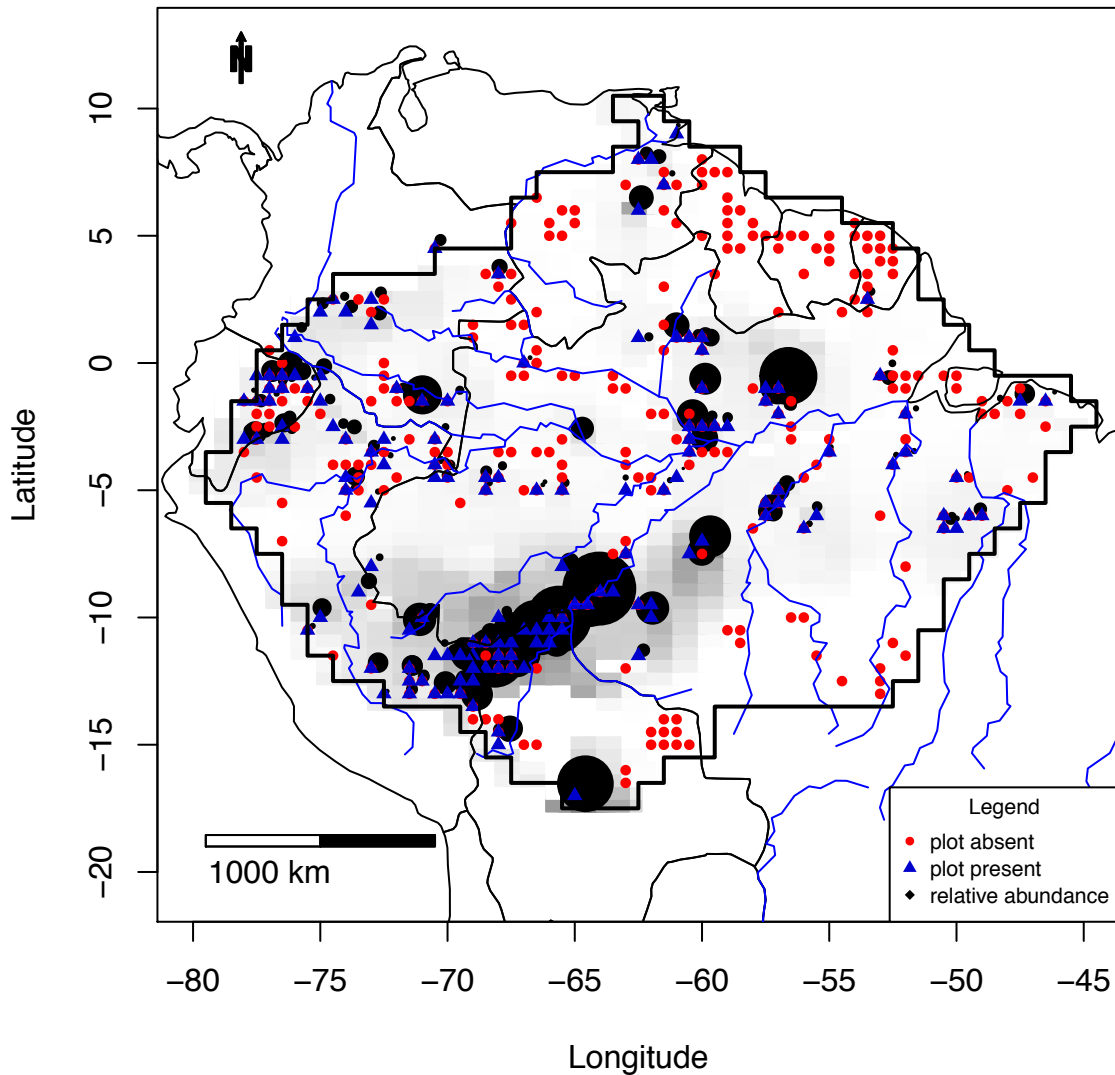



Figure S3\_30A Combined map of *Clathrotropis glaucophylla*

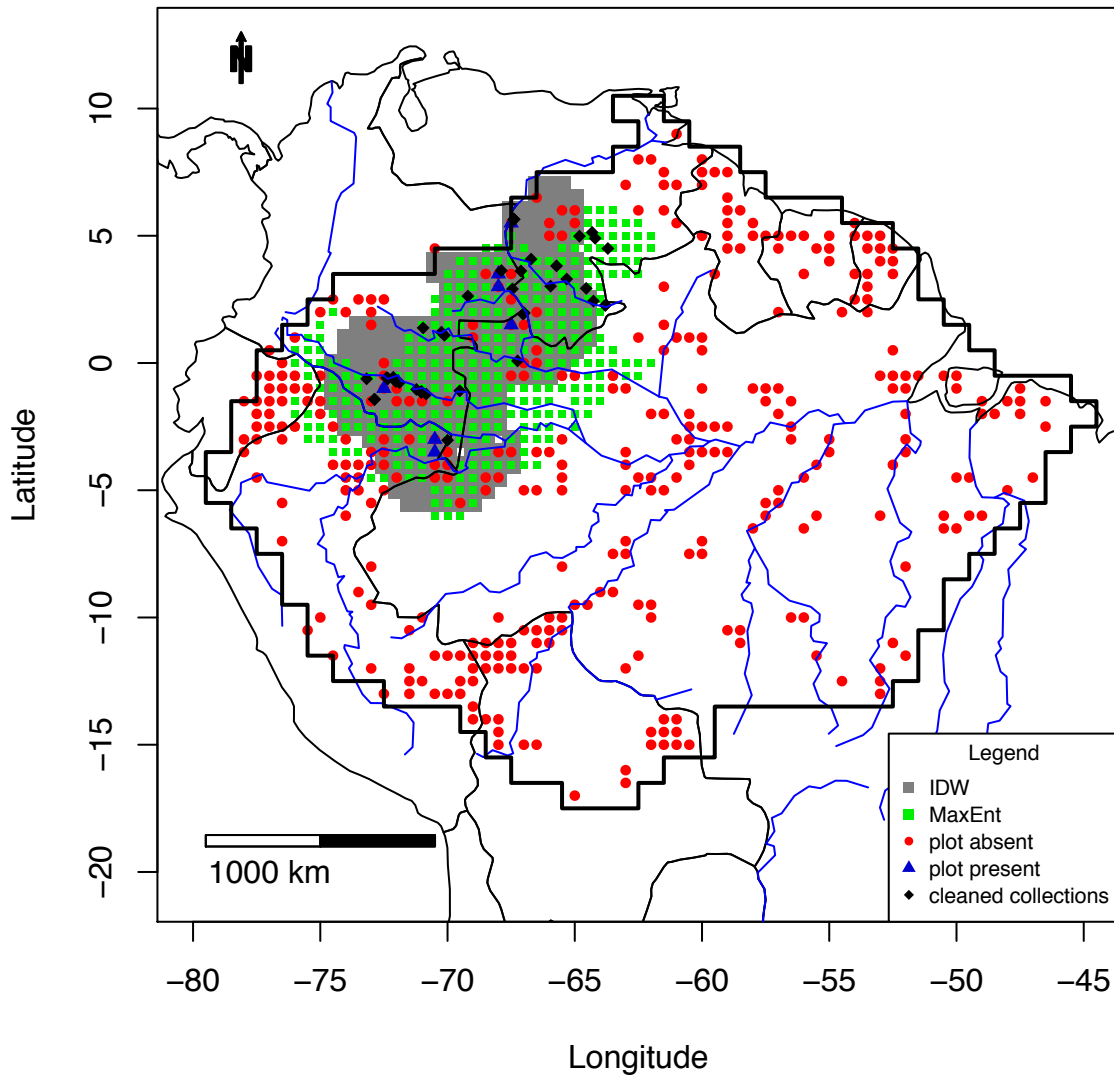

Figure S3\_30B MaxEnt map of *Clathrotropis glaucophylla*

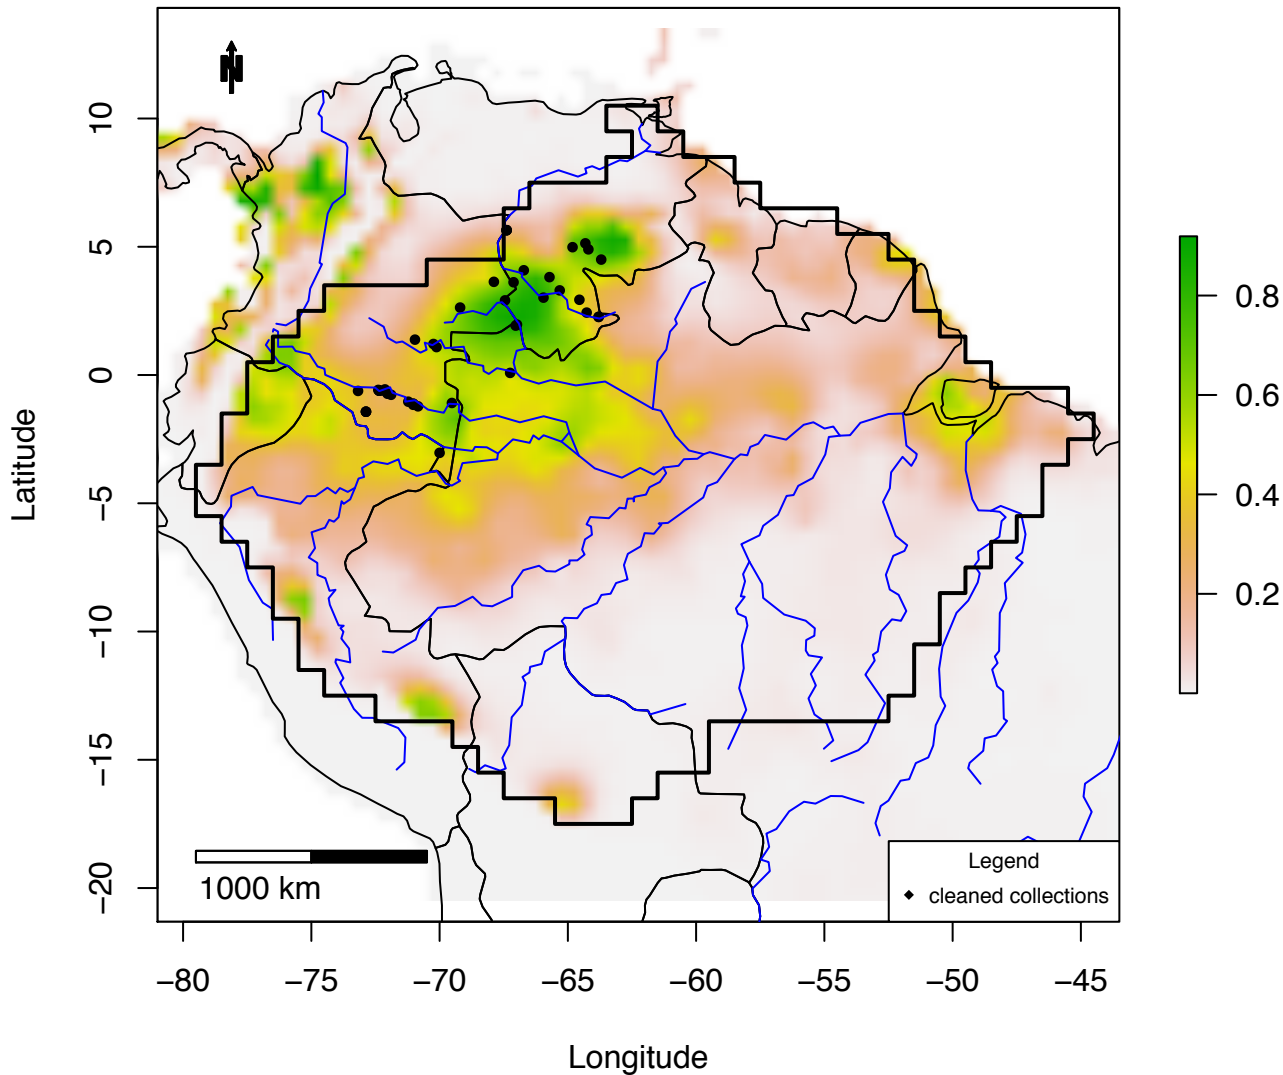

**Figure S3\_30C IDW map of *Clathrotropis glaucophylla*:**  
plots =0 – 0.43; IDW: 0 – 0.14

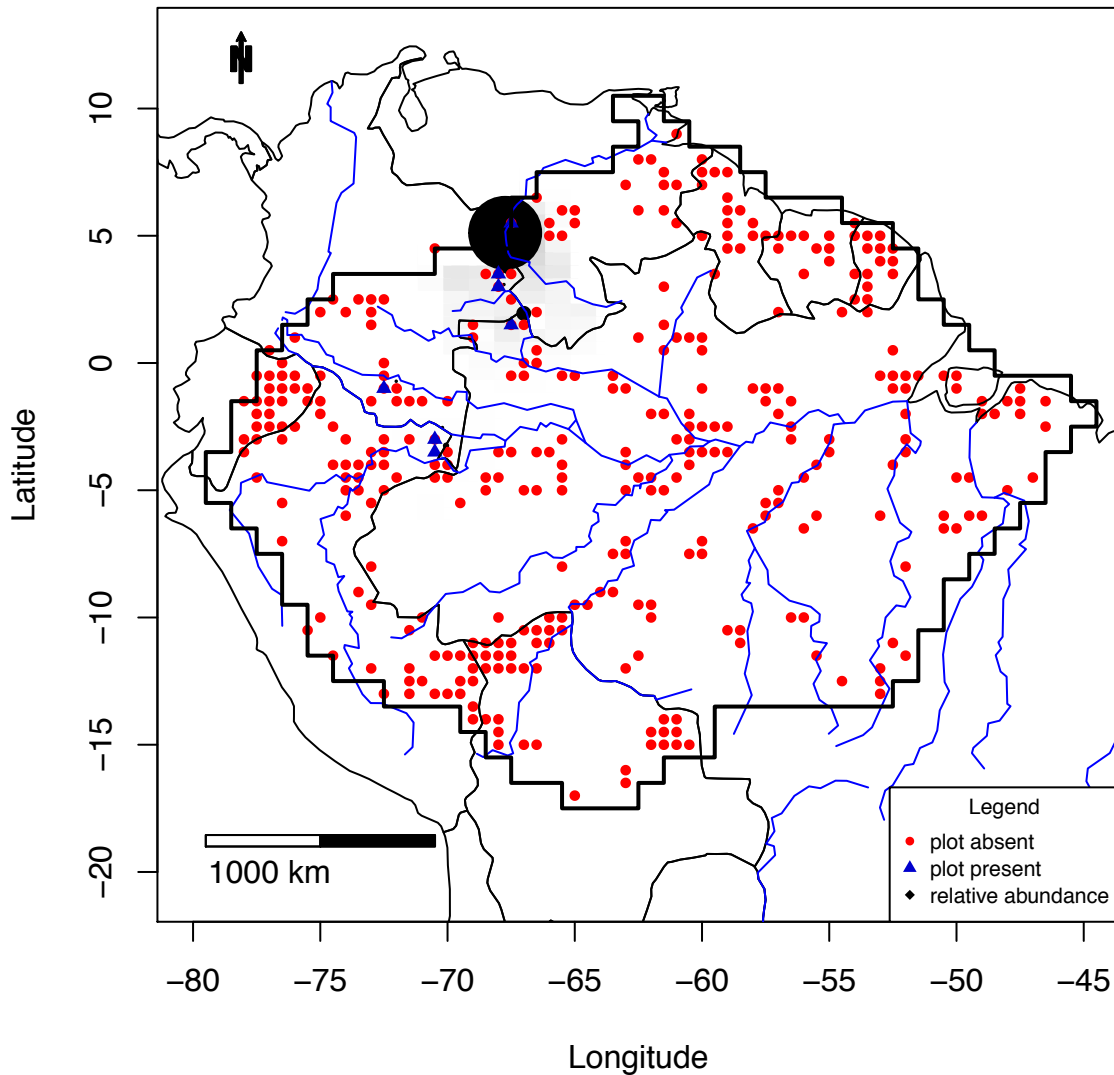

Figure S3\_31A Combined map of *Clathrotropis\_macrocarpa*

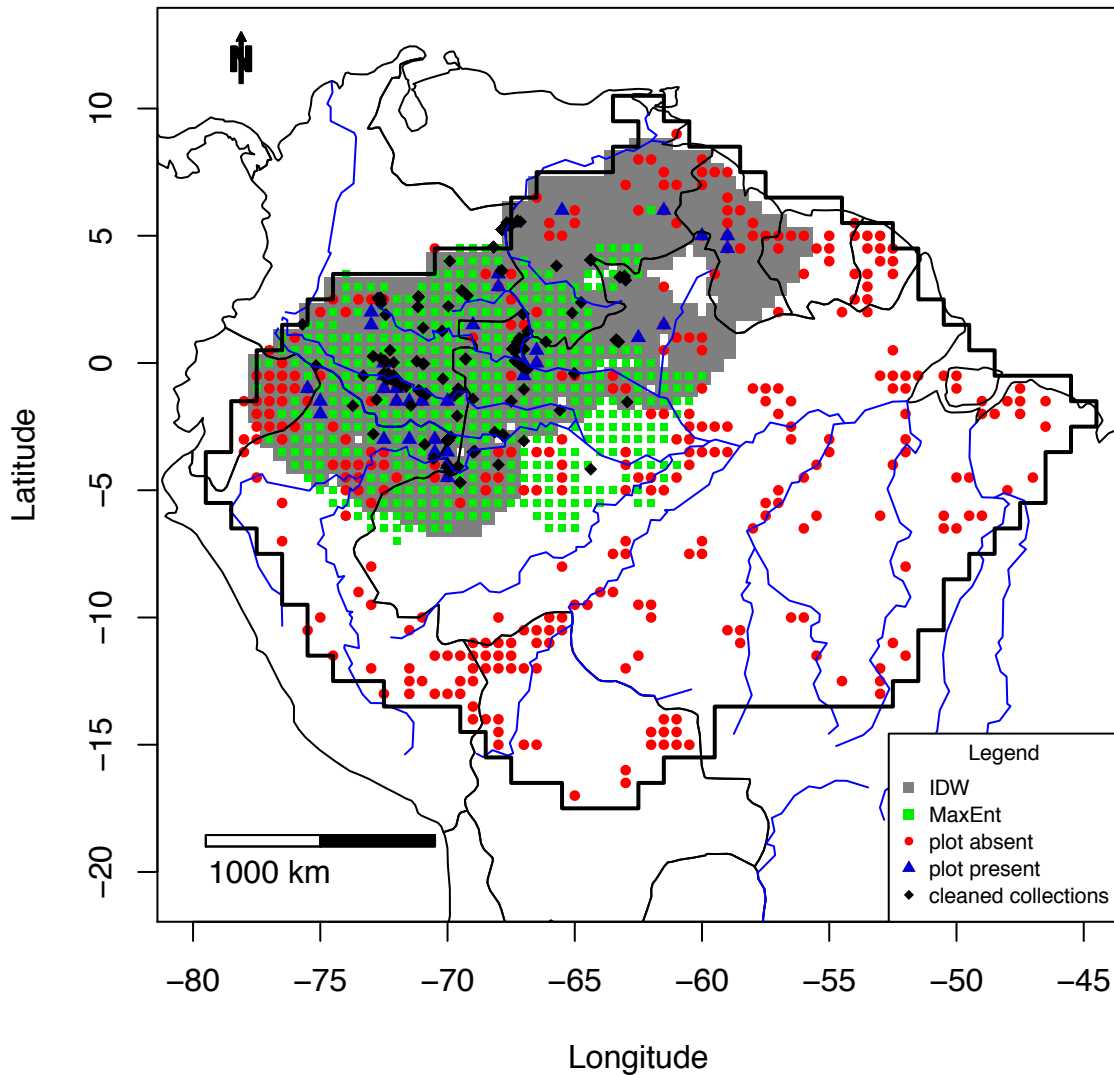

Figure S3\_31B MaxEnt map of *Clathrotropis\_macrocarpa*

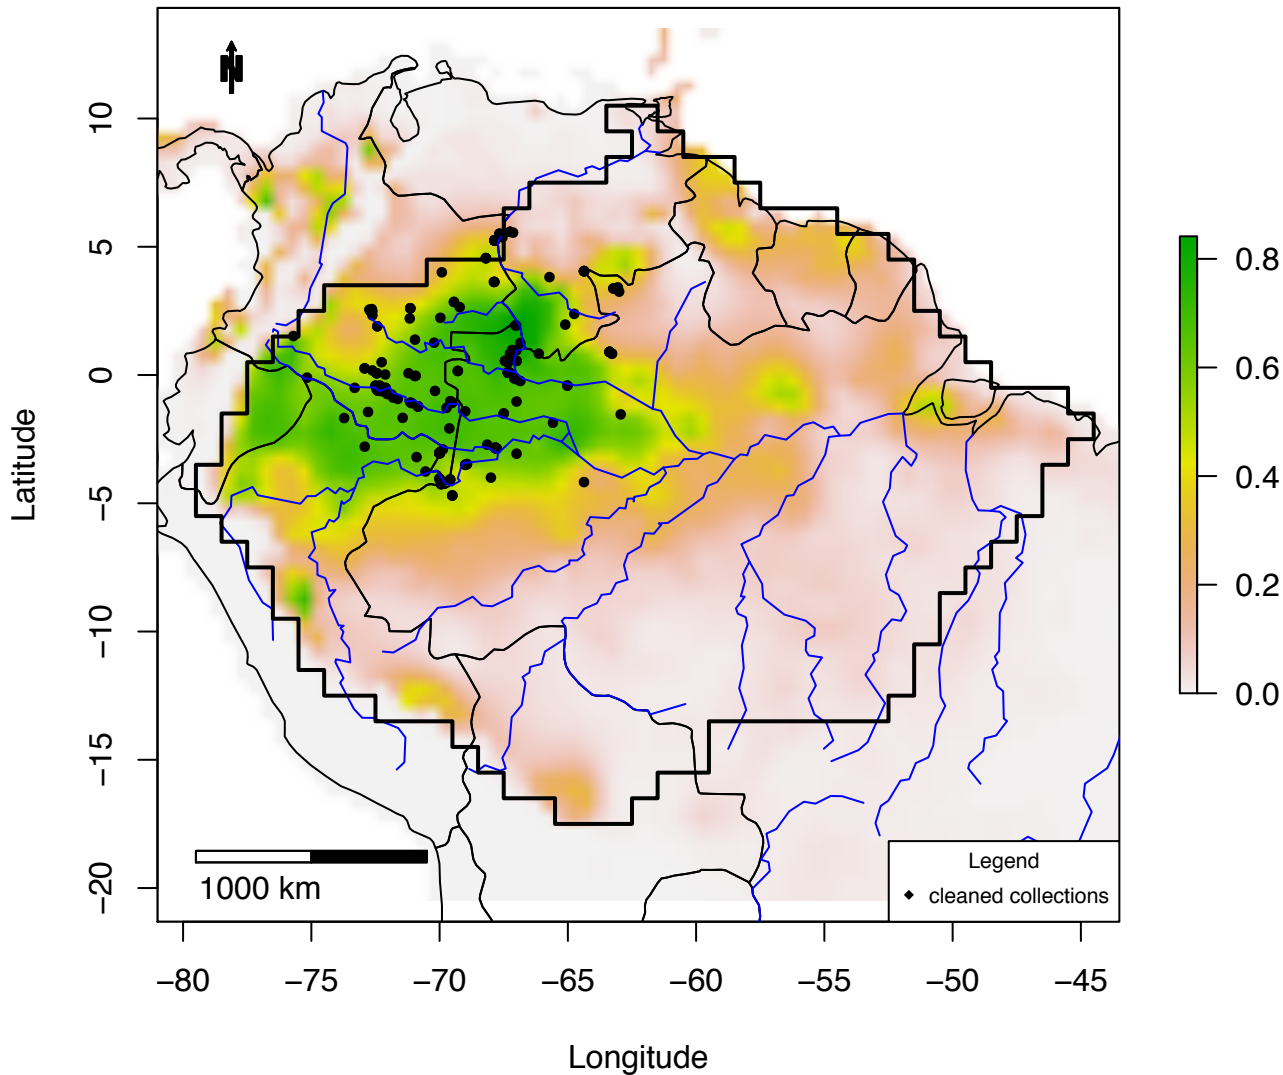

Figure S3\_31C IDW map of *Clathrotropis macrocarpa*:  
plots = 0 – 0.27; IDW: 0 – 0.13

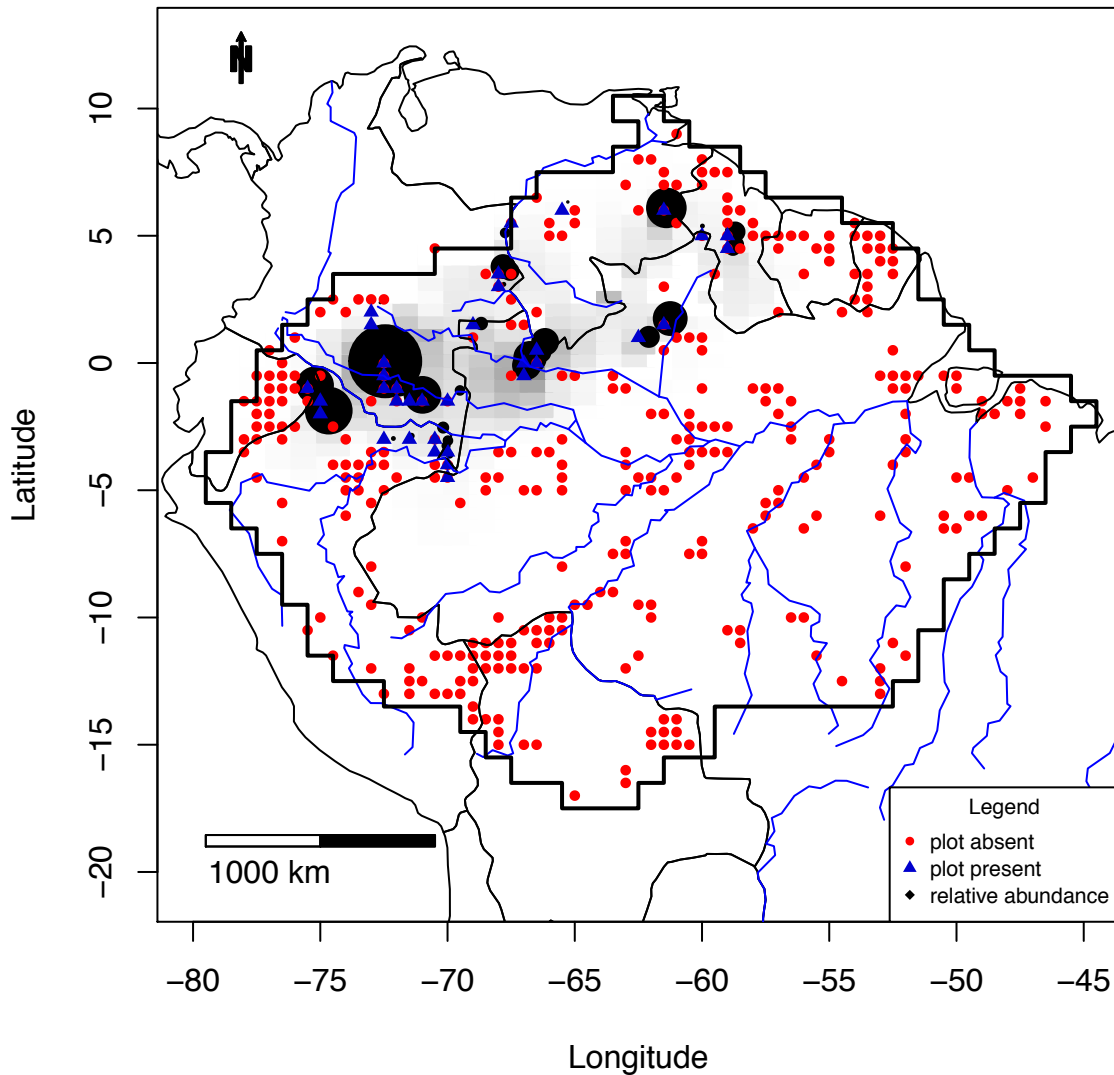

Figure S3\_32A Combined map of *Conceveiba\_guianensis*

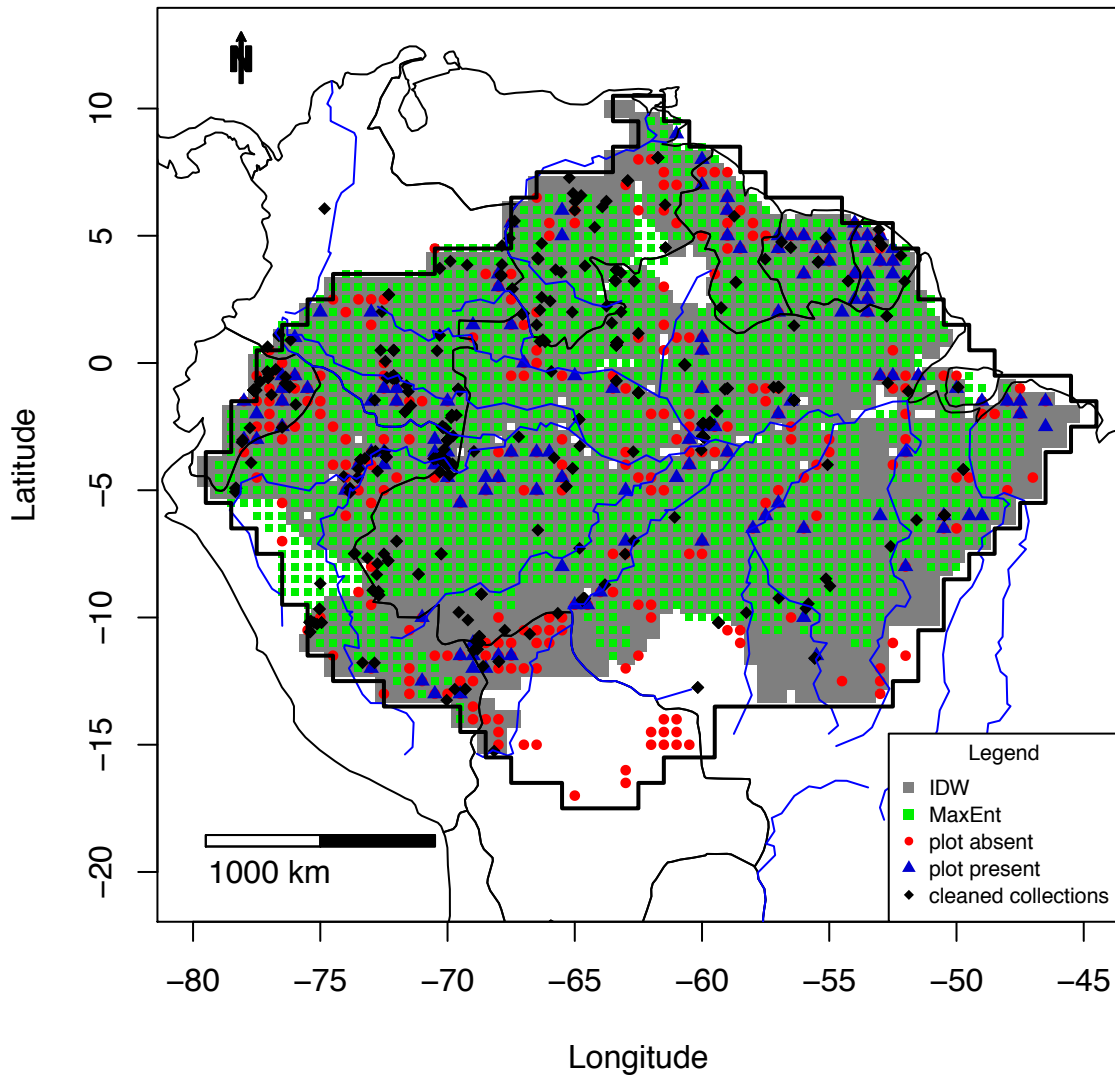

Figure S3\_32B MaxEnt map of *Conceveiba\_guianensis*

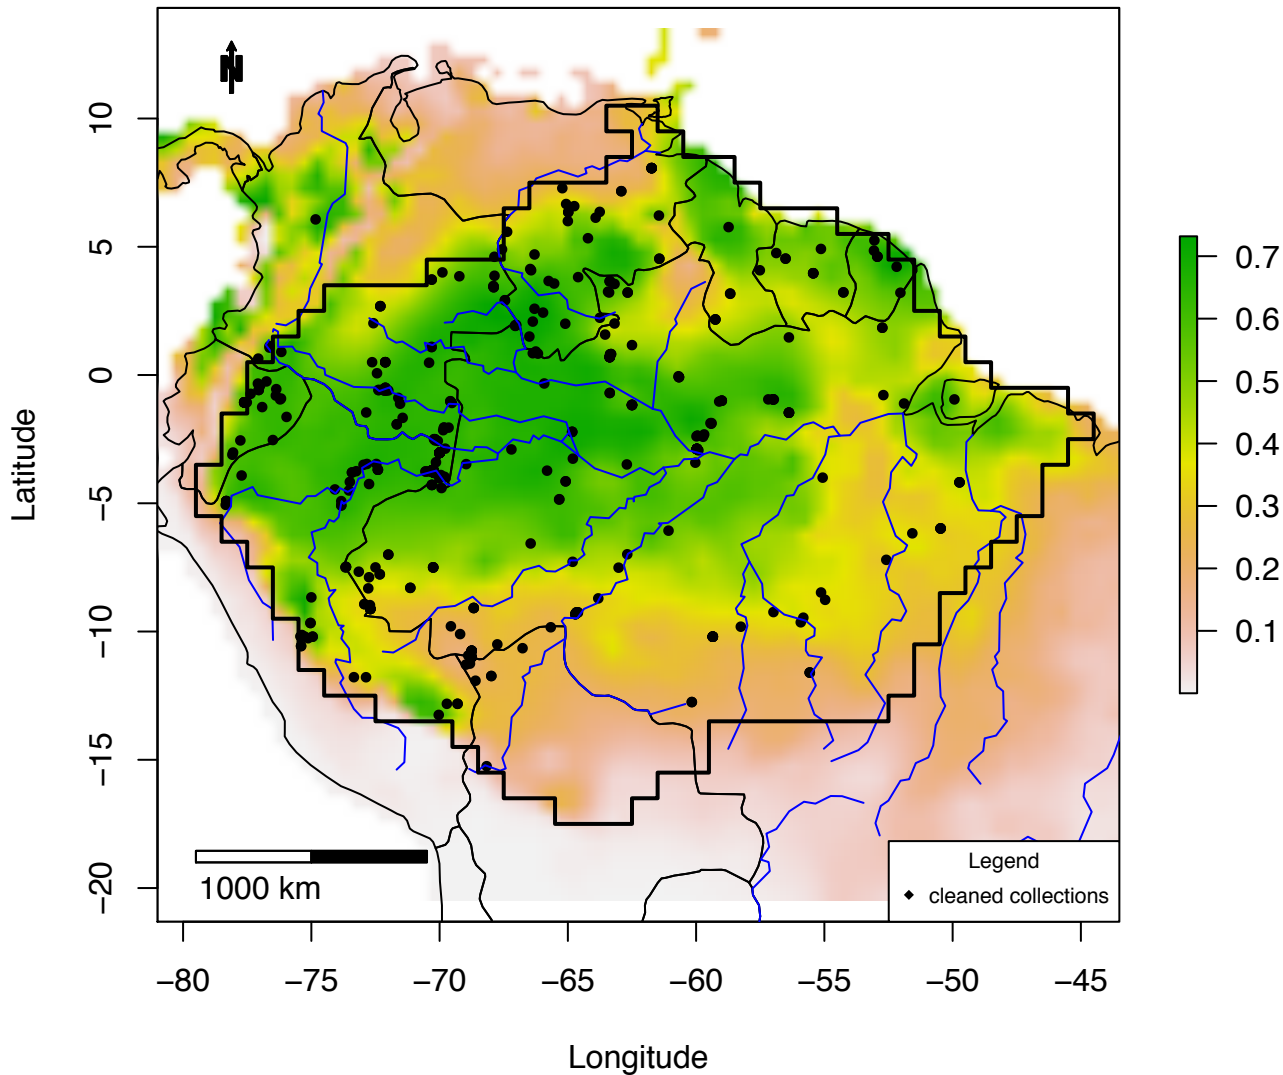



**Figure S3\_32C IDW map of *Conceveiba guianensis*:  
plots =0 – 0.04; IDW: 0 – 0.04**

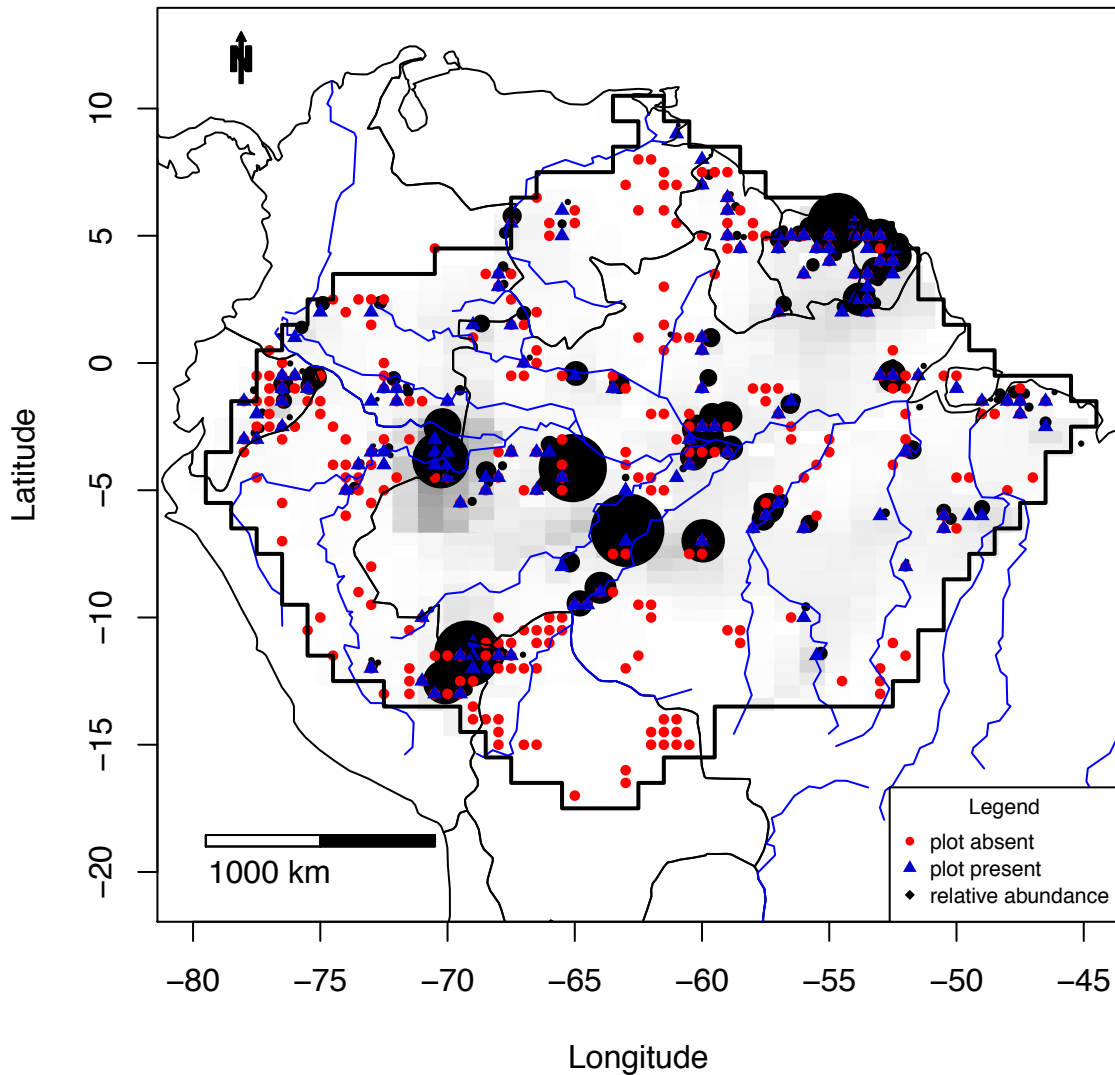

Figure S3\_33A Combined map of *Couepia\_guianensis*

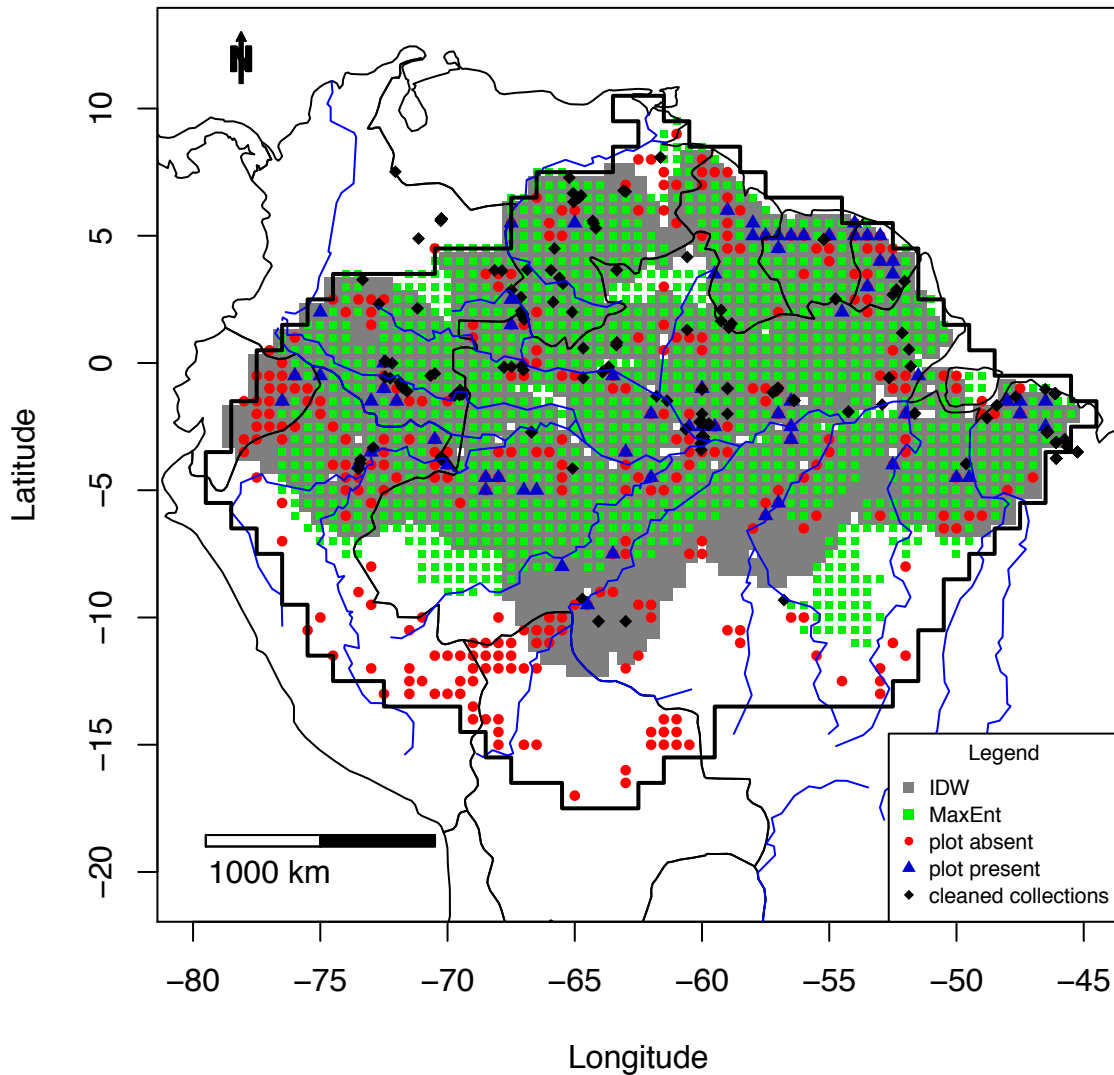

Figure S3\_33B MaxEnt map of *Couepia\_guianensis*

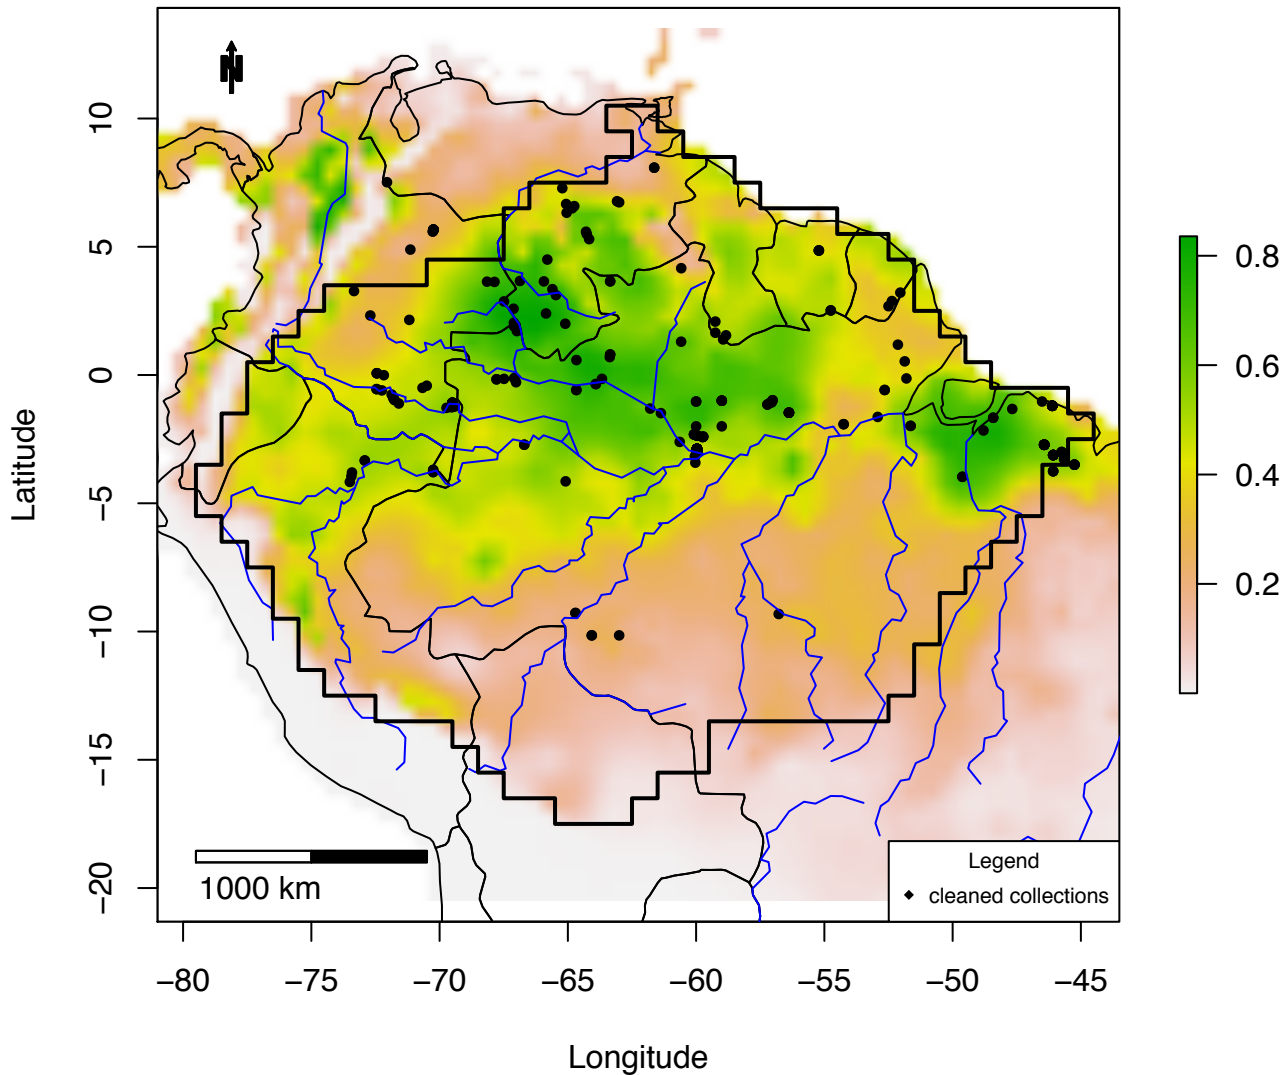

**Figure S3\_33C IDW map of *Couepia guianensis*:**  
**plots =0 – 0.17; IDW: 0 – 0.08**

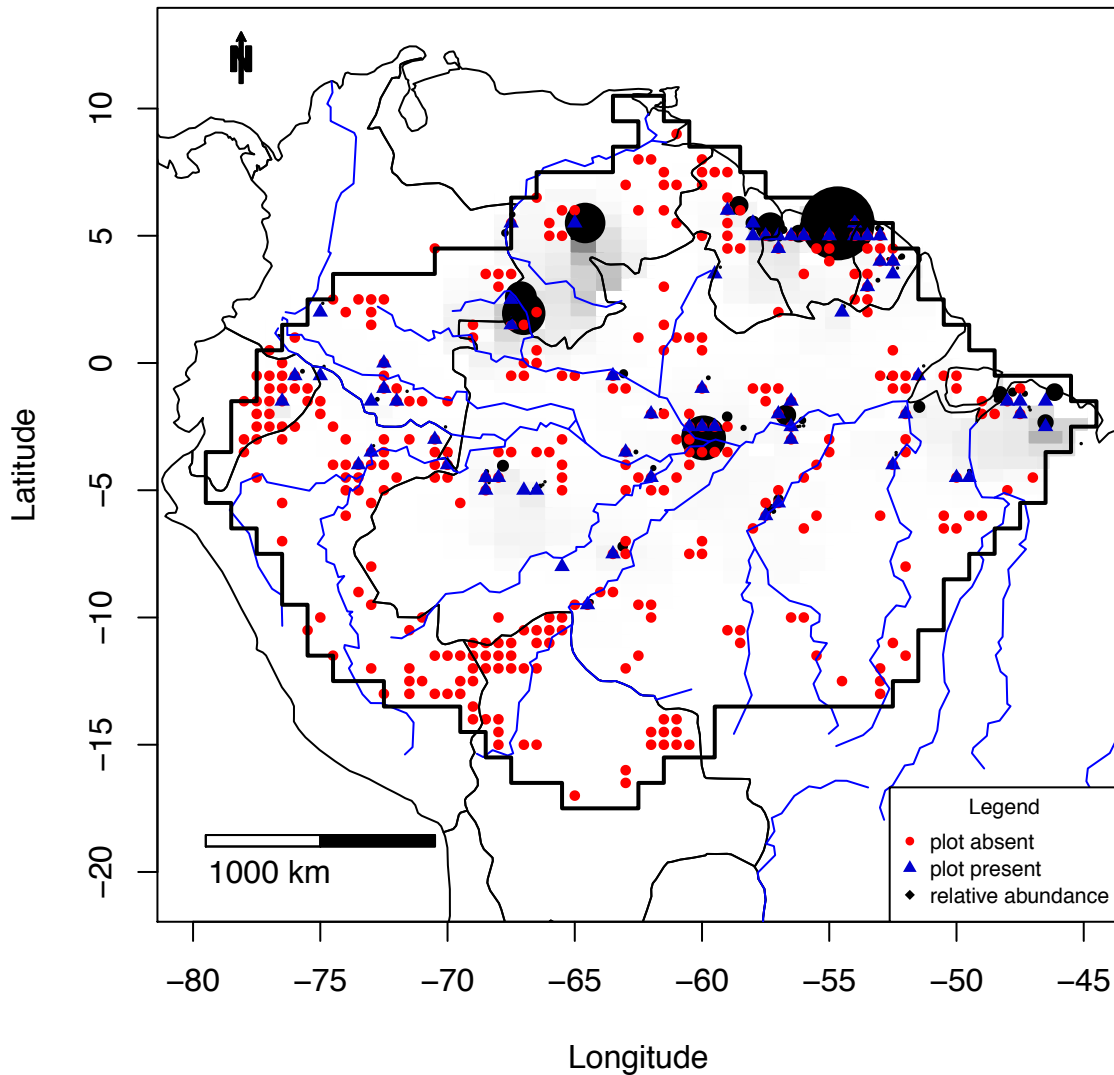

Figure S3\_34A Combined map of *Couepia\_paraensis*

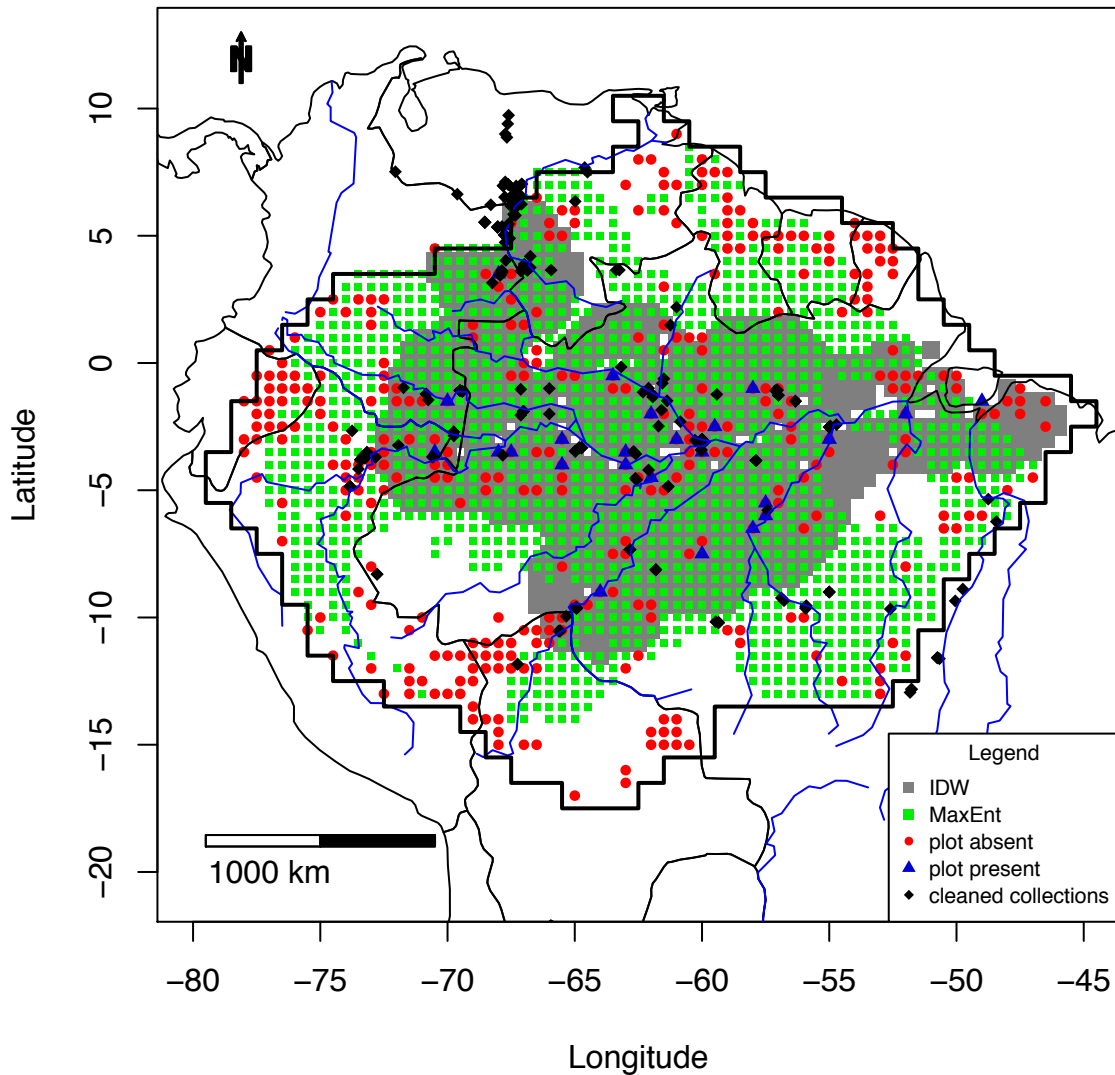

Figure S3\_34B MaxEnt map of *Couepia\_paraensis*

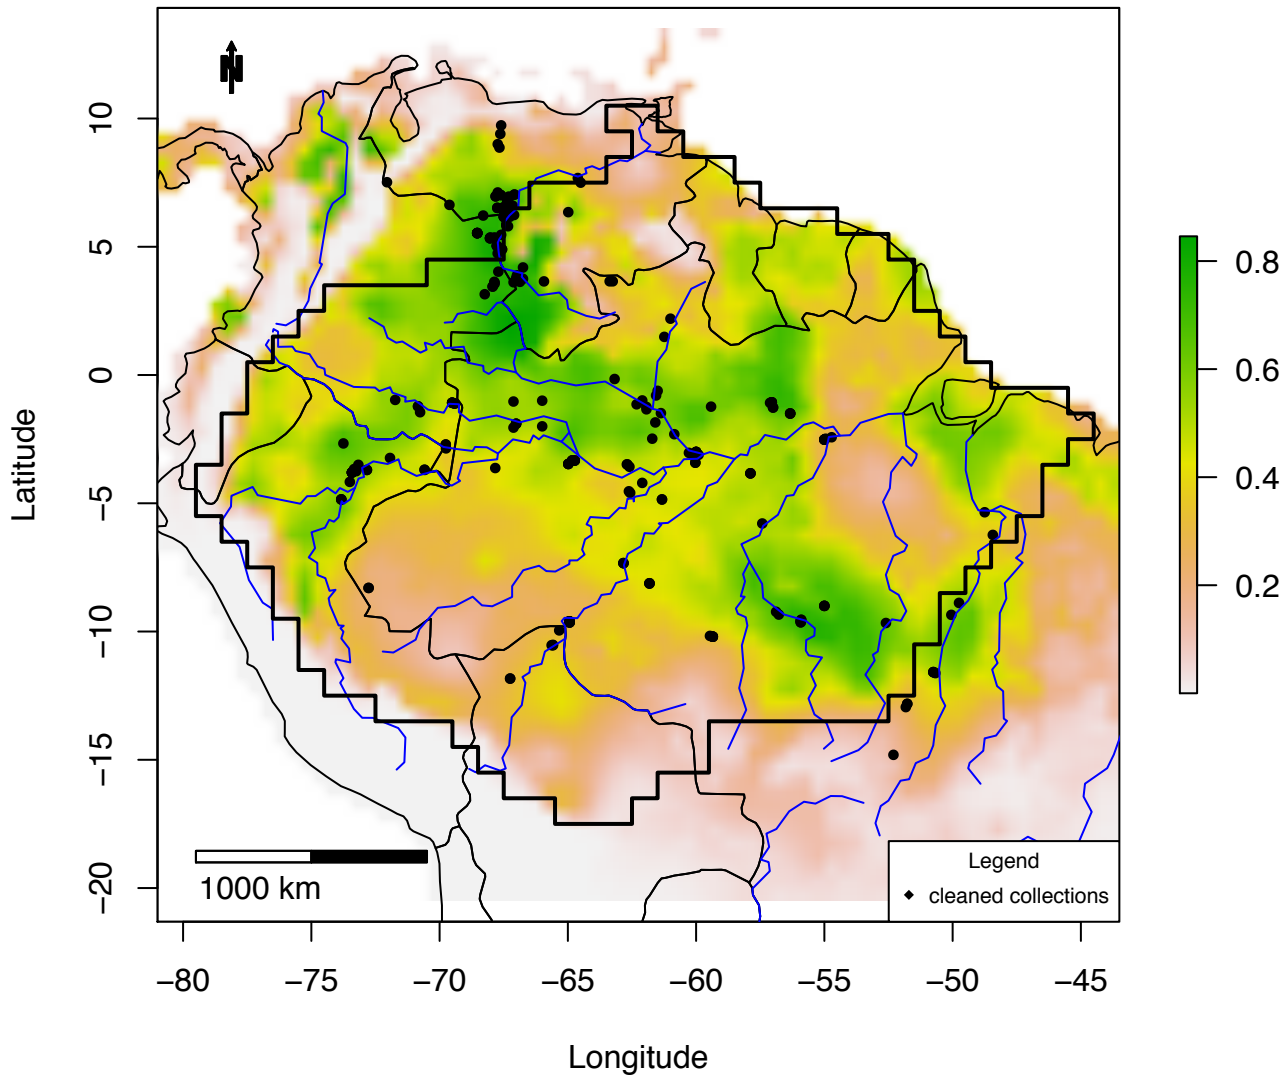

**Figure S3\_34C IDW map of *Couepia paraensis*:**  
**plots =0 – 0.34; IDW: 0 – 0.05**

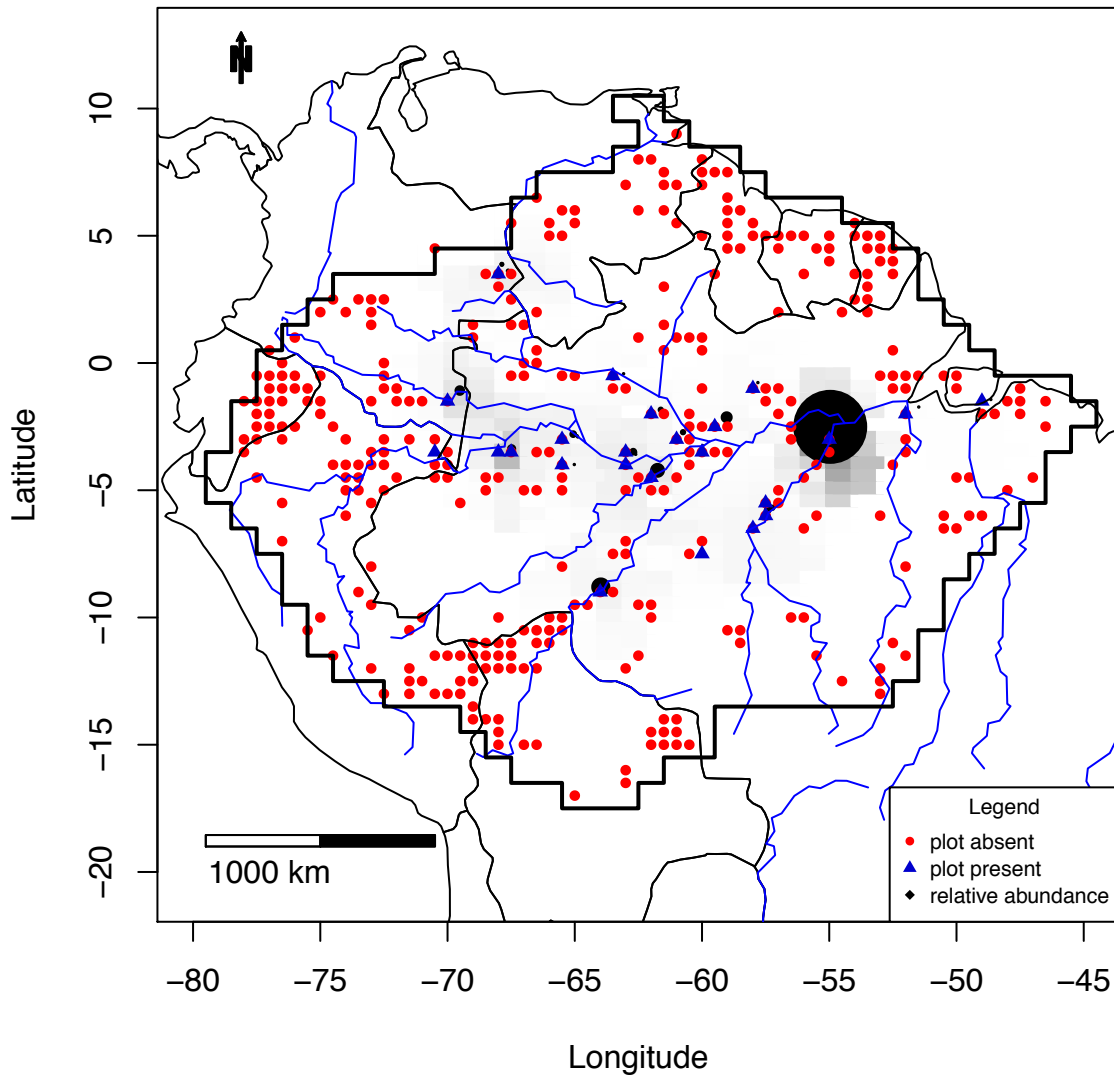

Figure S3\_35A Combined map of *Cynometra\_marginata*

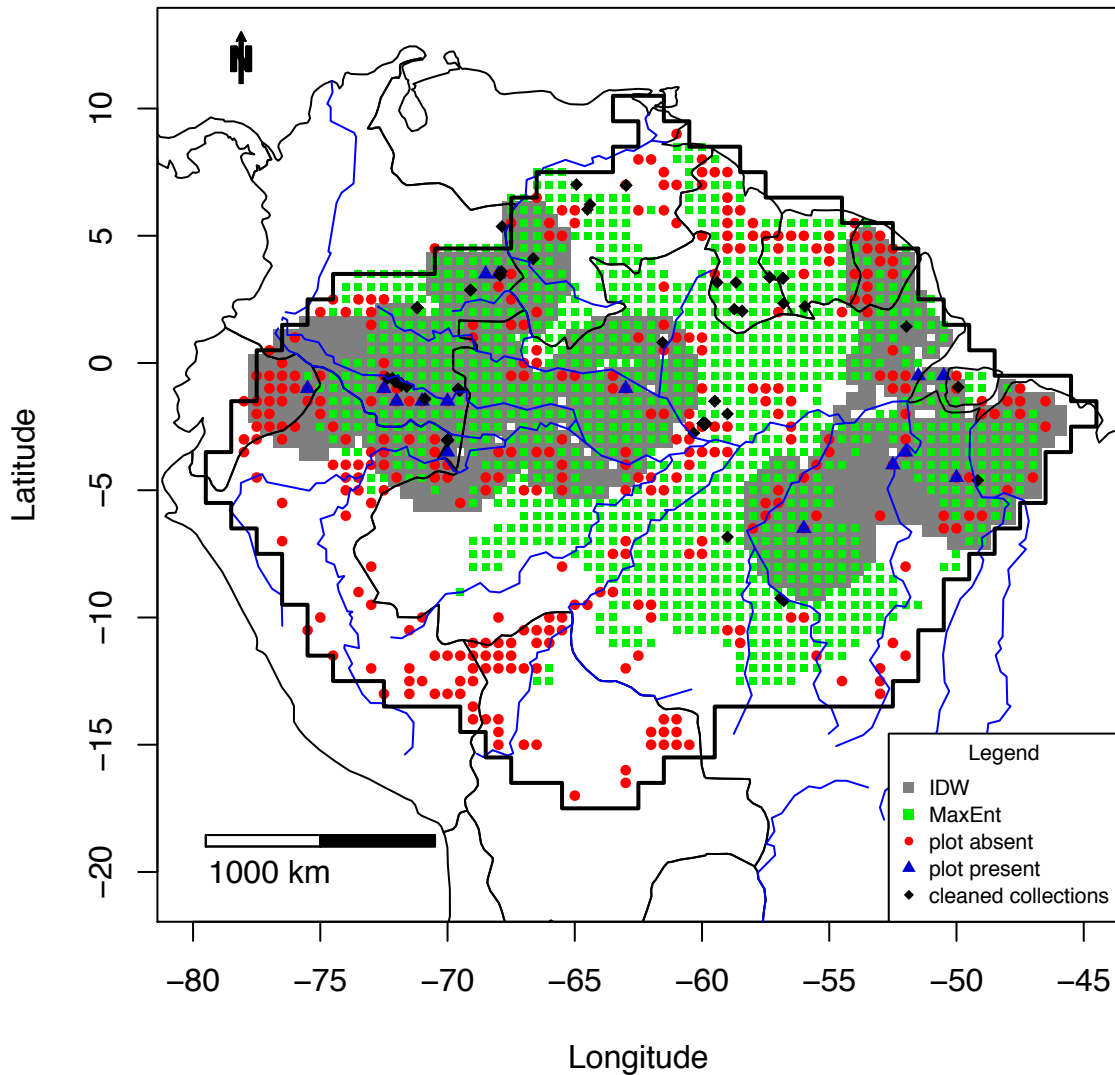



Figure S3\_35B MaxEnt map of *Cynometra marginata*

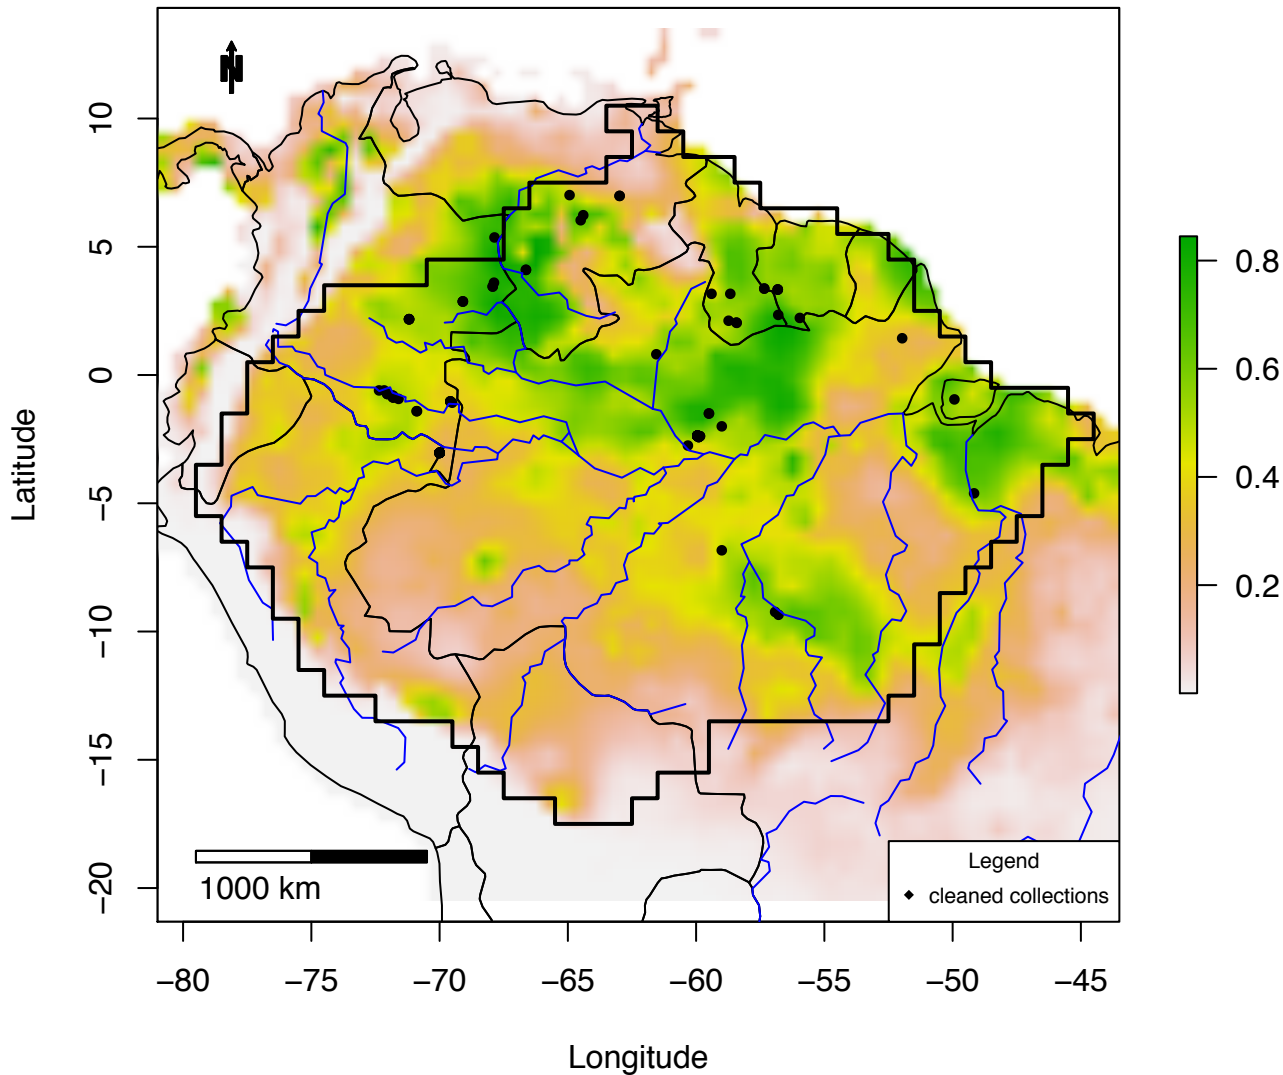

Figure S3\_35C IDW map of *Cynometra marginata*:  
plots =0 – 0.2; IDW: 0 – 0.04

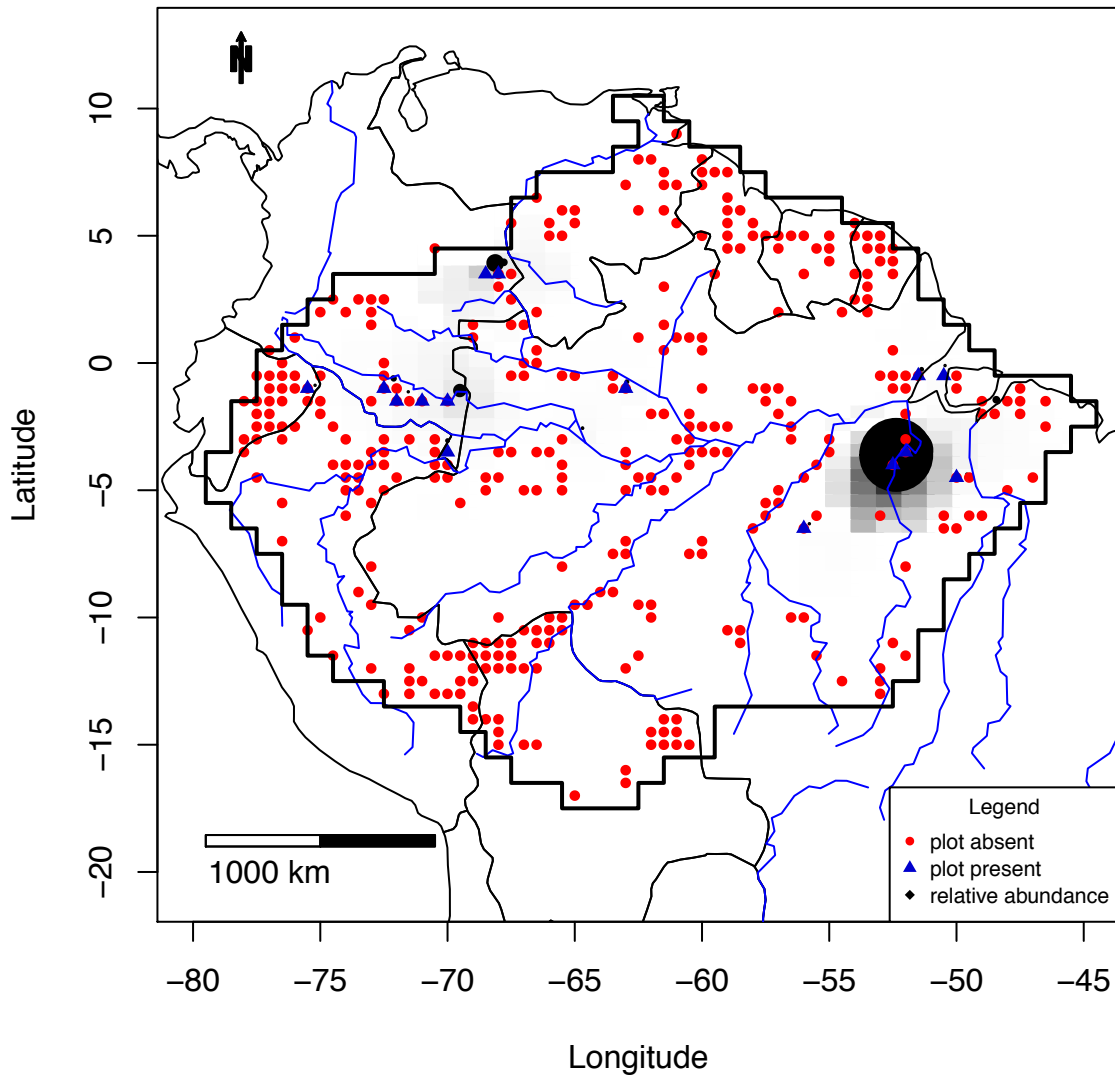

Figure S3\_36A Combined map of *Diploporis\_purpurea*

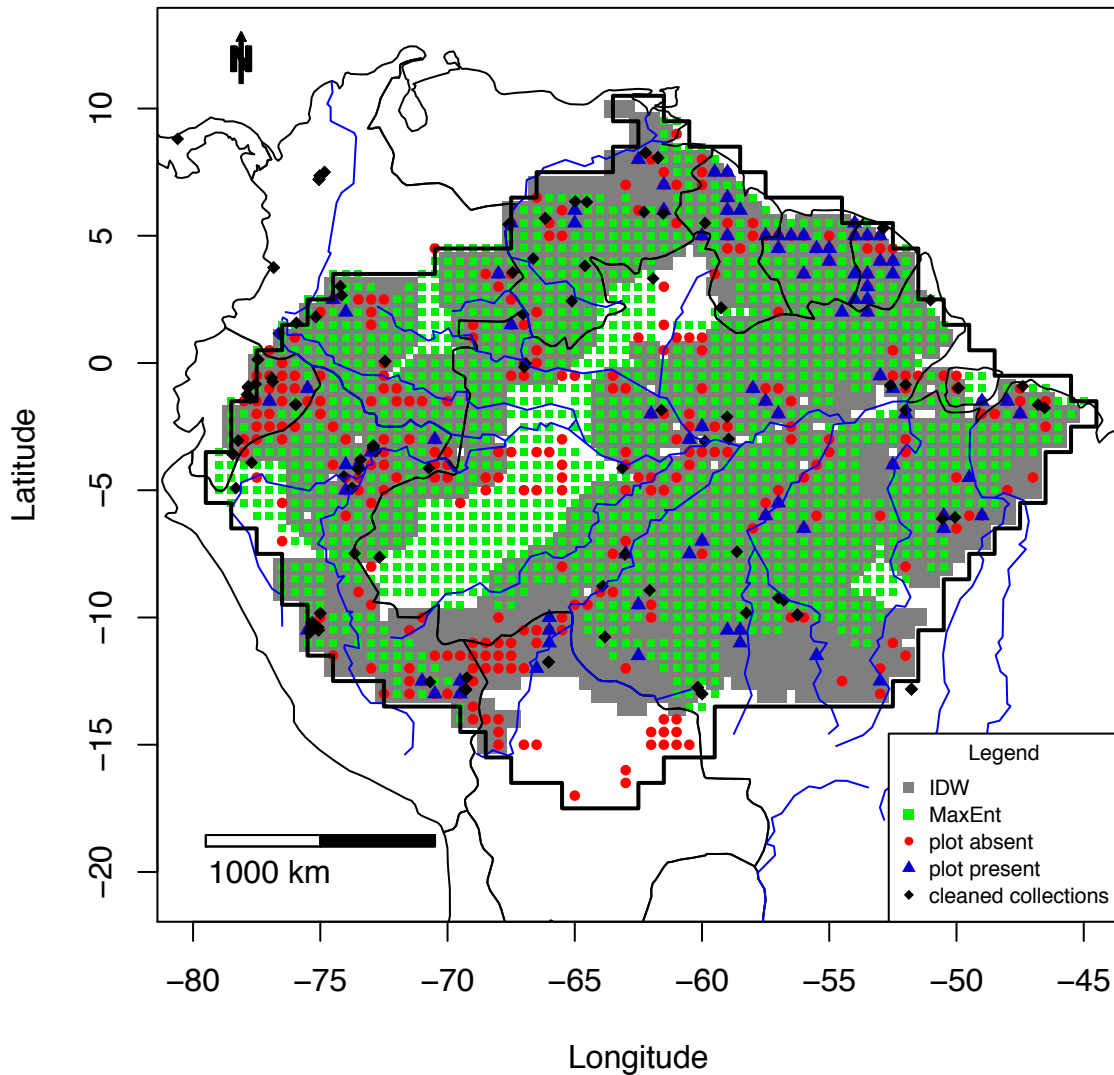

Figure S3\_36B MaxEnt map of *Diploptropis\_purpurea*

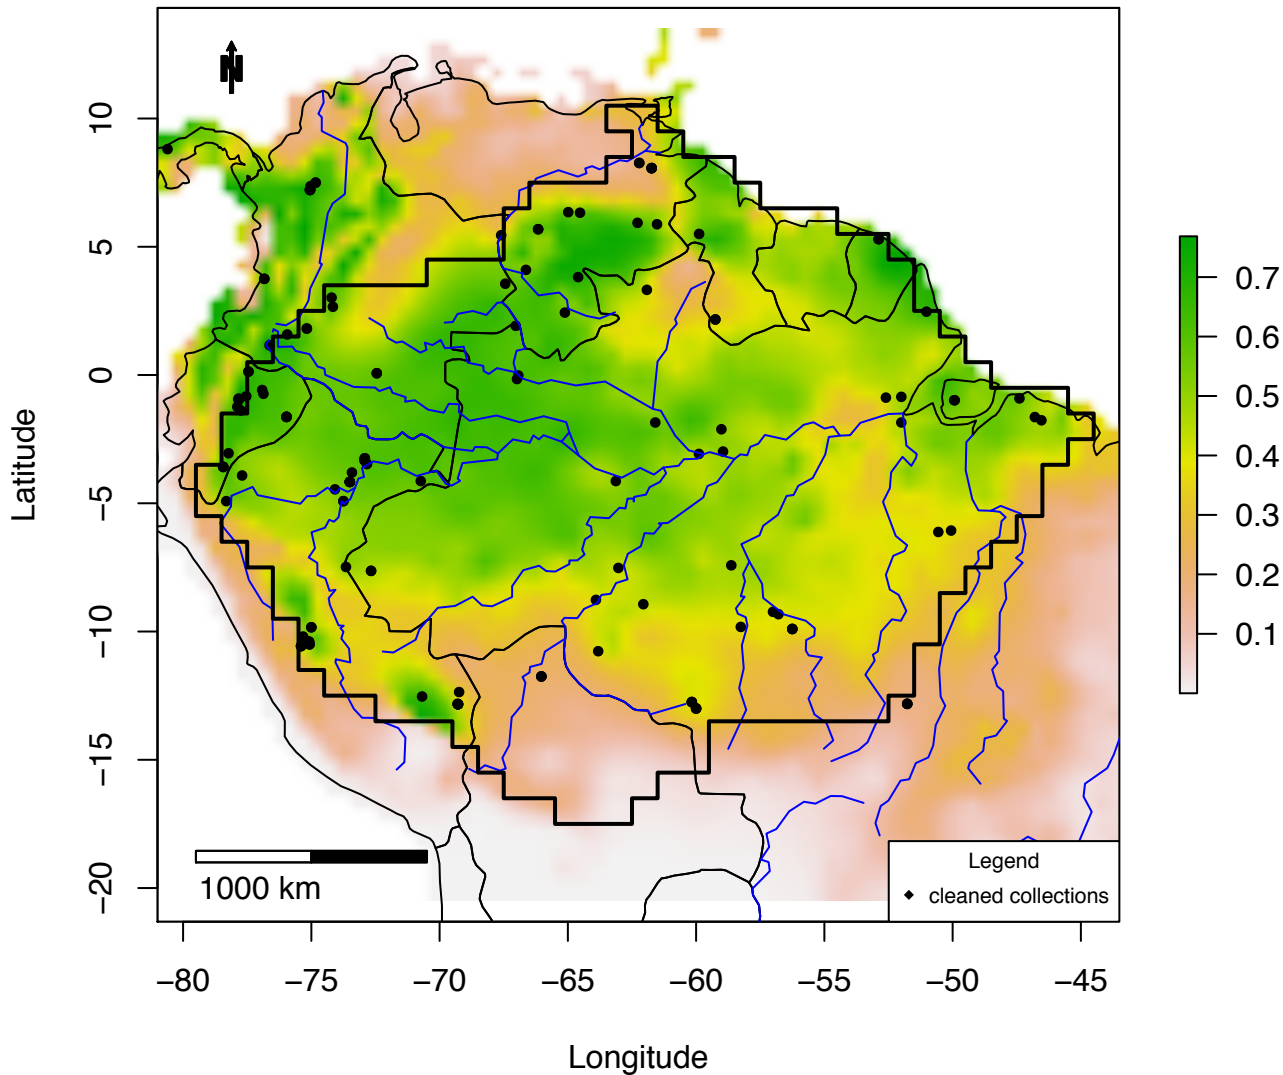

Figure S3\_36C IDW map of *Diplotripsis\_purpurea*:  
plots =0 – 0.06; IDW: 0 – 0.02

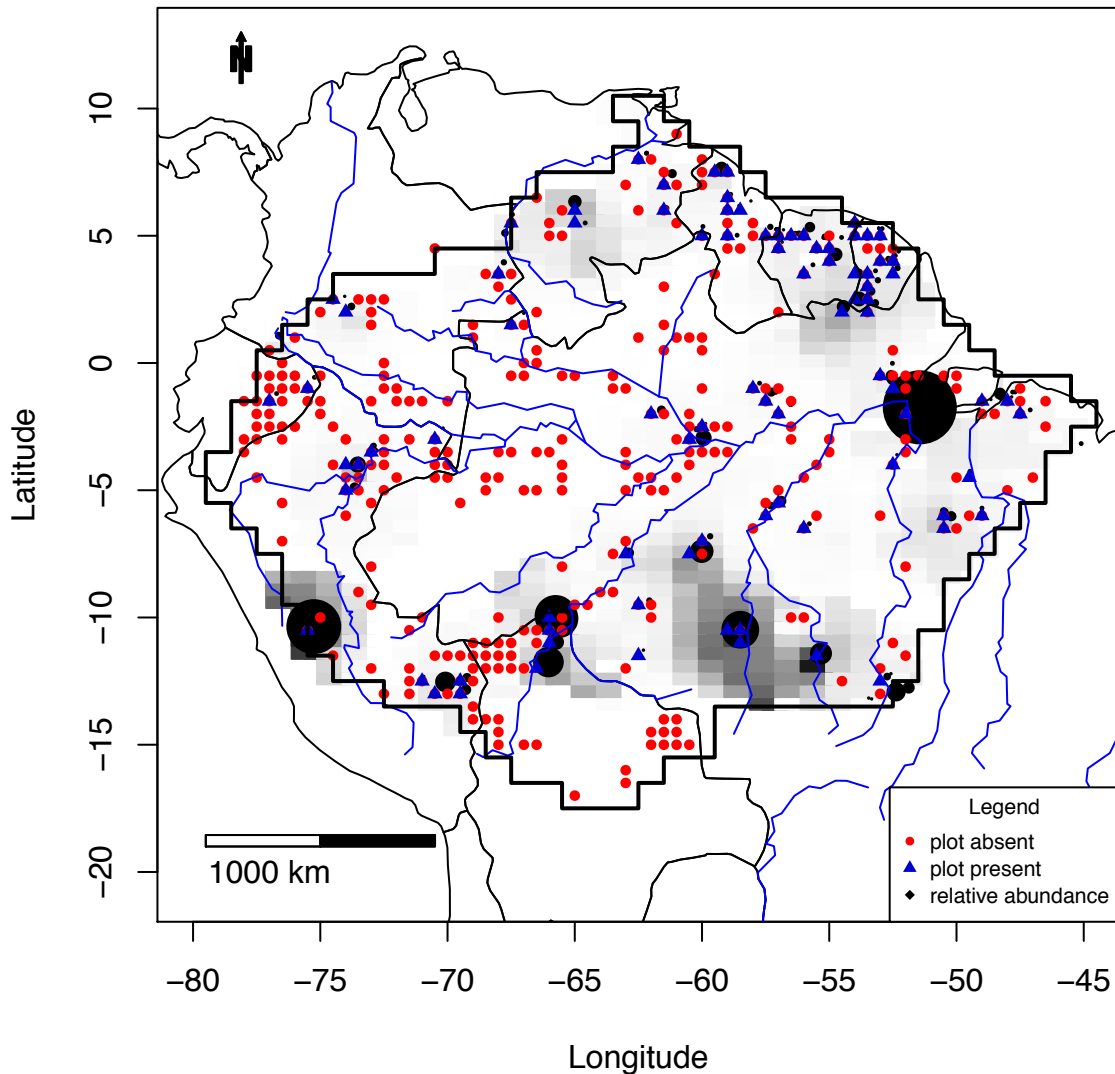

Figure S3\_37A Combined map of *Drypetes amazonica*

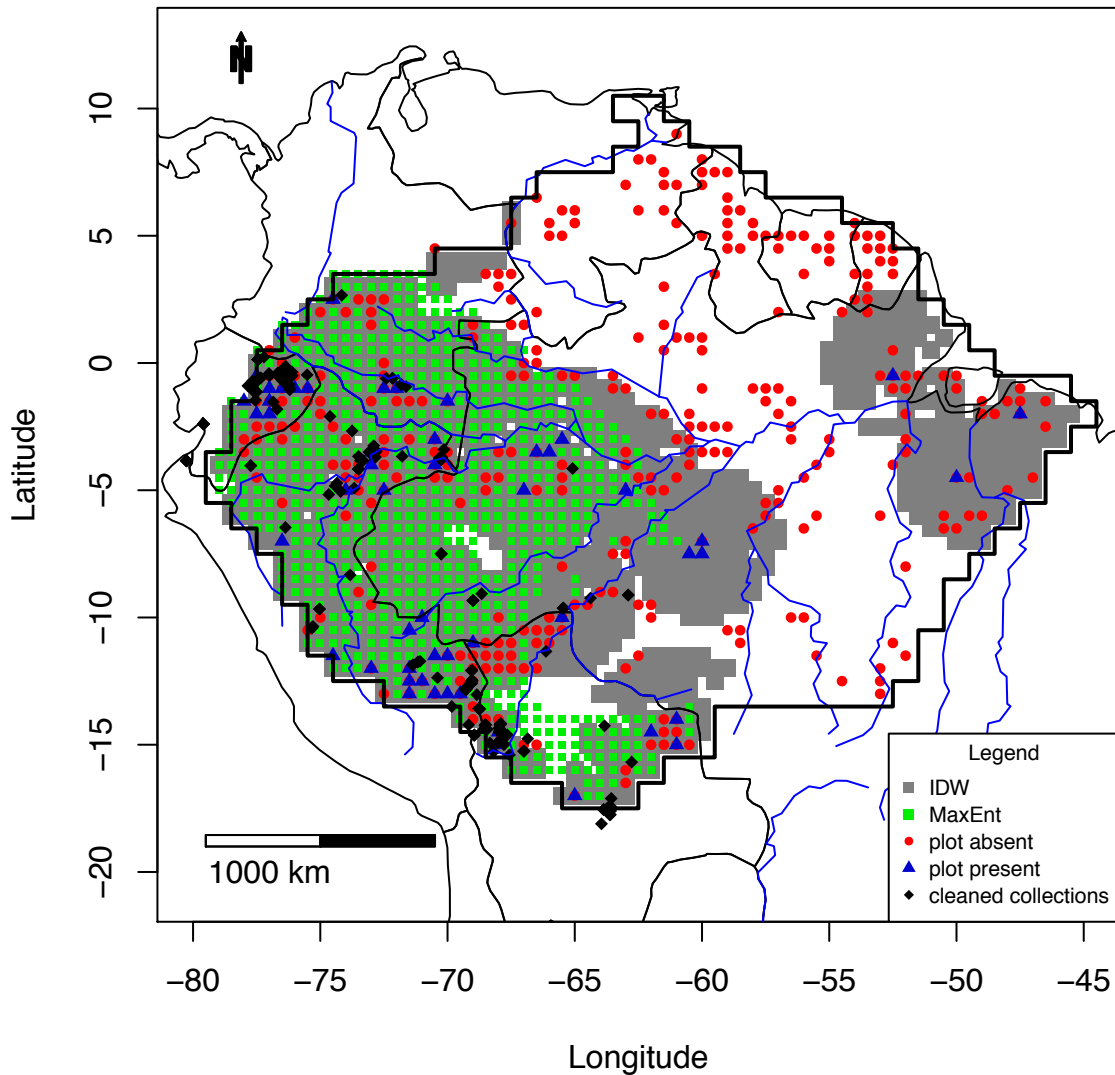

Figure S3\_37B MaxEnt map of *Drypetes amazonica*

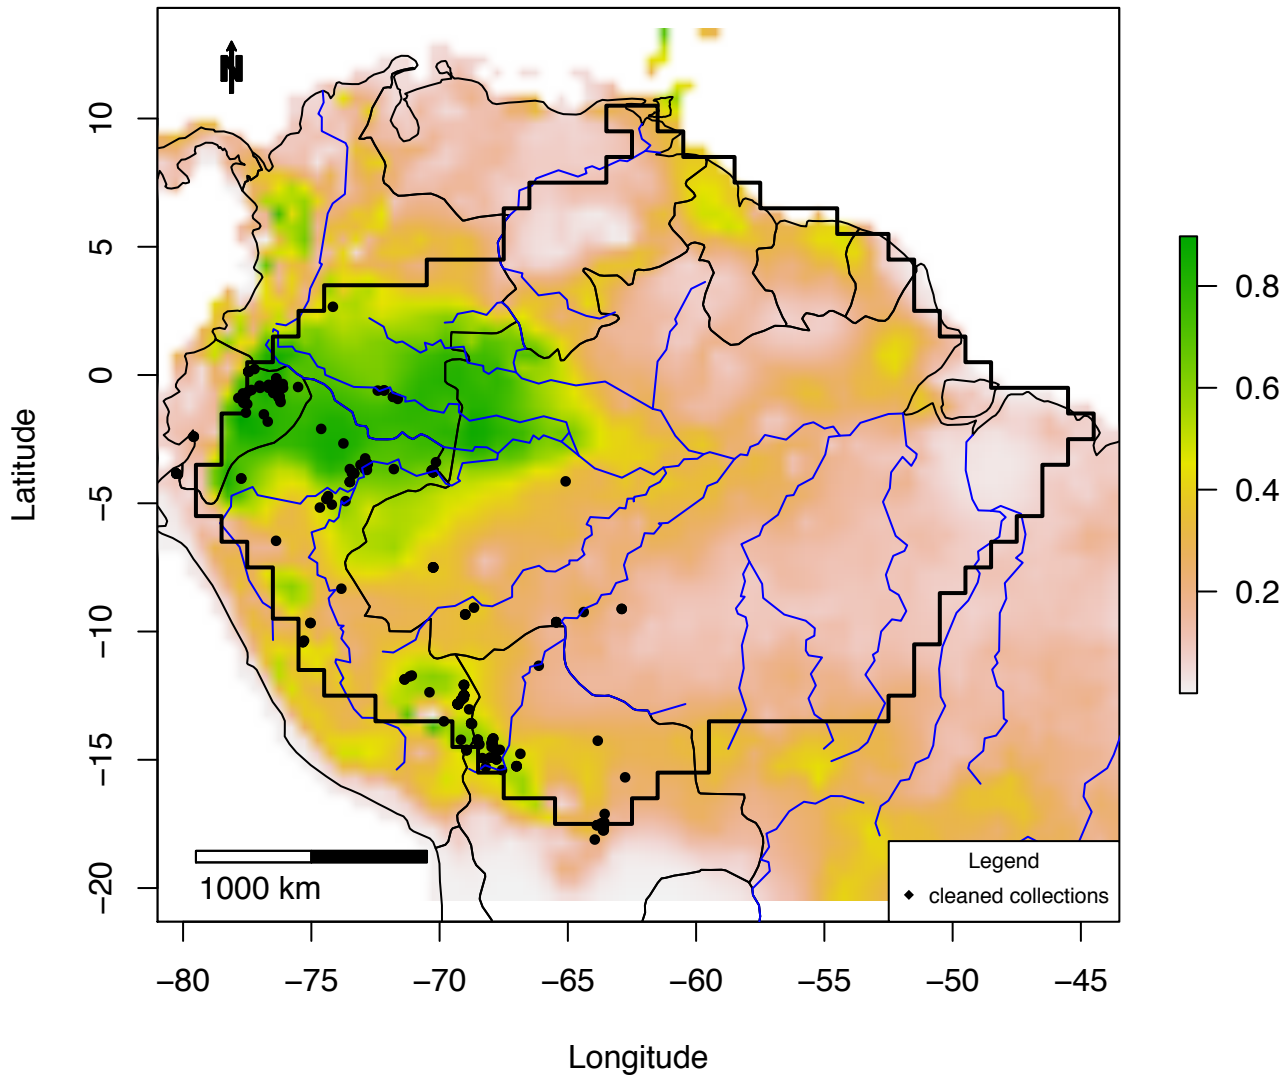

Figure S3\_37C IDW map of *Drypetes amazonica*:  
plots = 0 – 0.12; IDW: 0 – 0.06

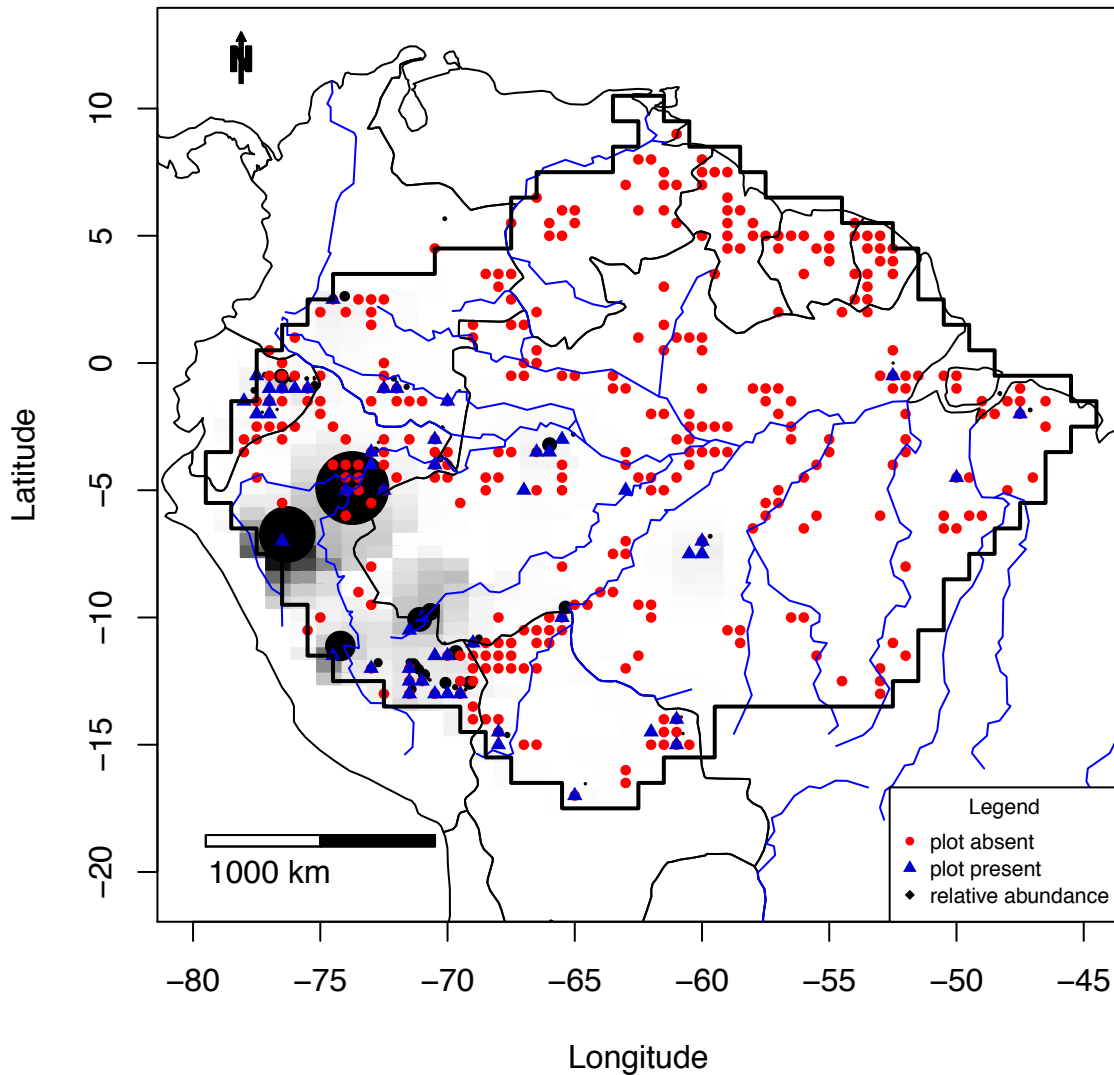



Figure S3\_38A Combined map of *Ecclinusa guianensis*

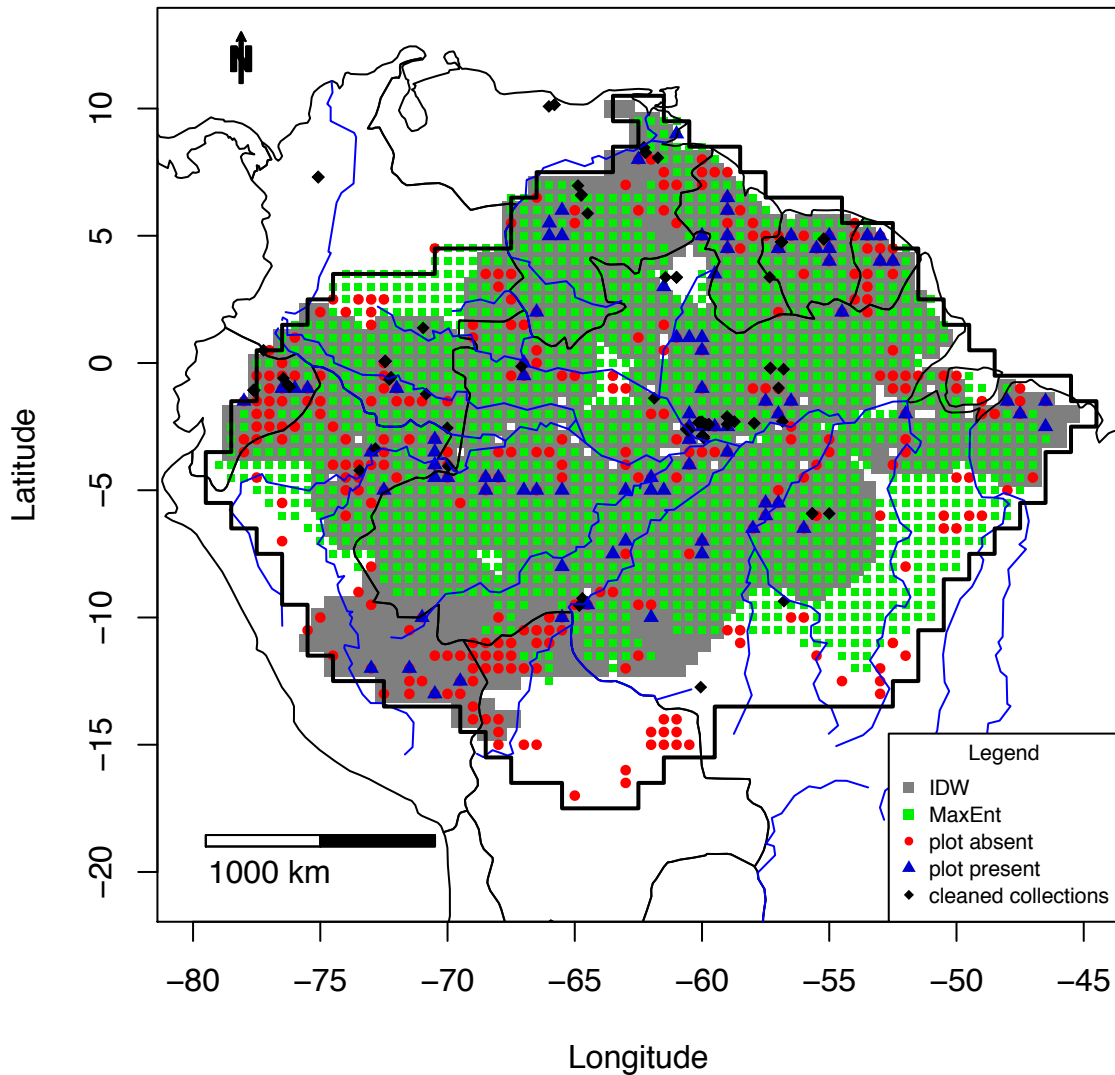

Figure S3\_38B MaxEnt map of *Ecclinusa\_guianensis*

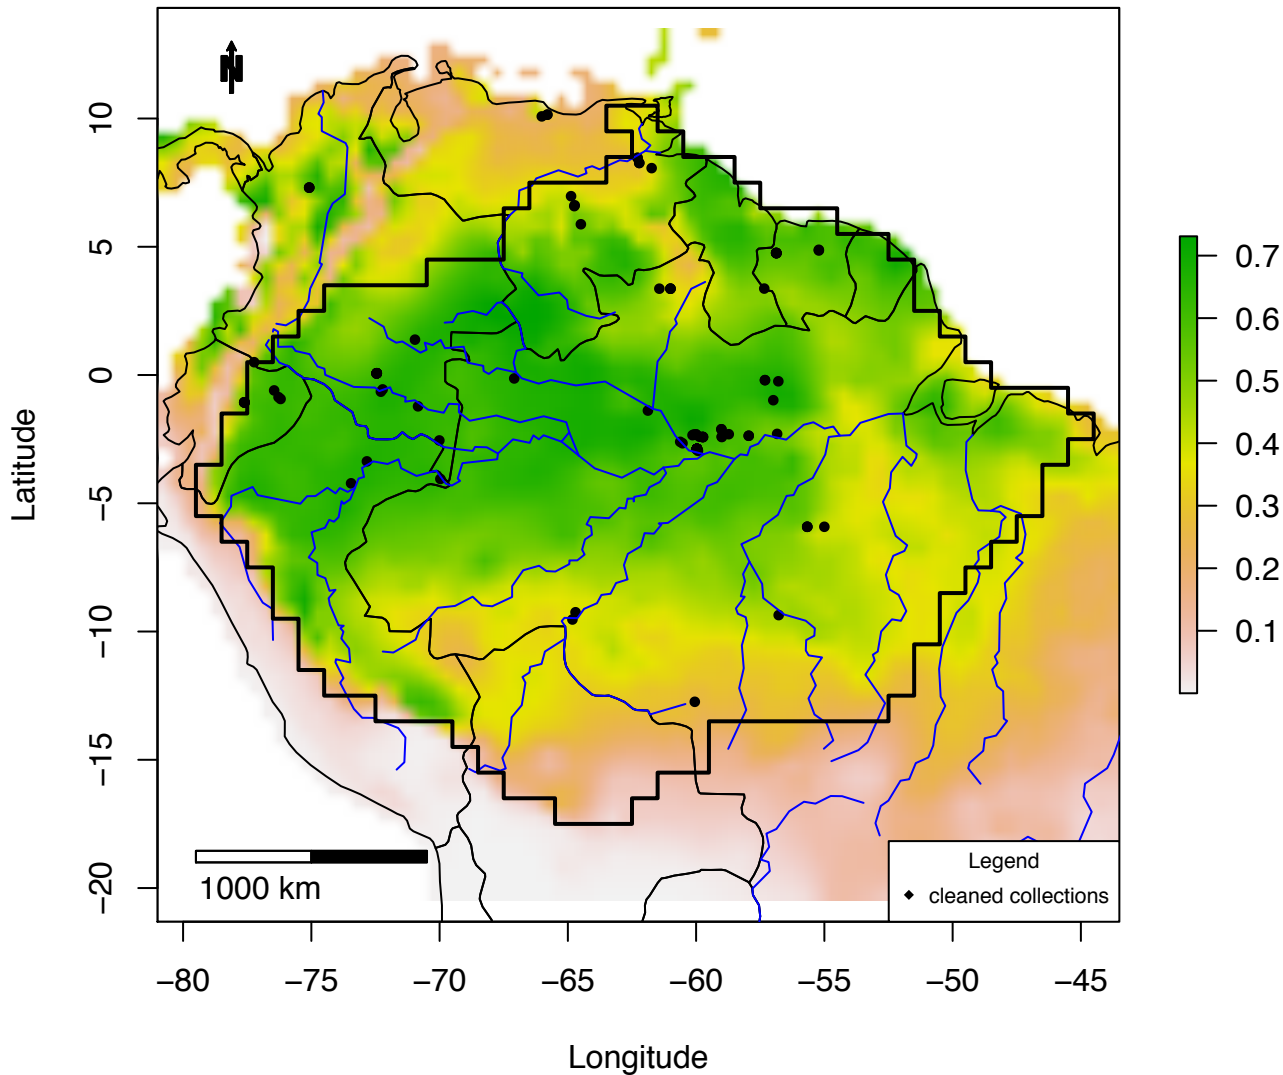

Figure S3\_38C IDW map of *Ecclinusa guianensis*:  
plots =0 – 0.17; IDW: 0 – 0.09

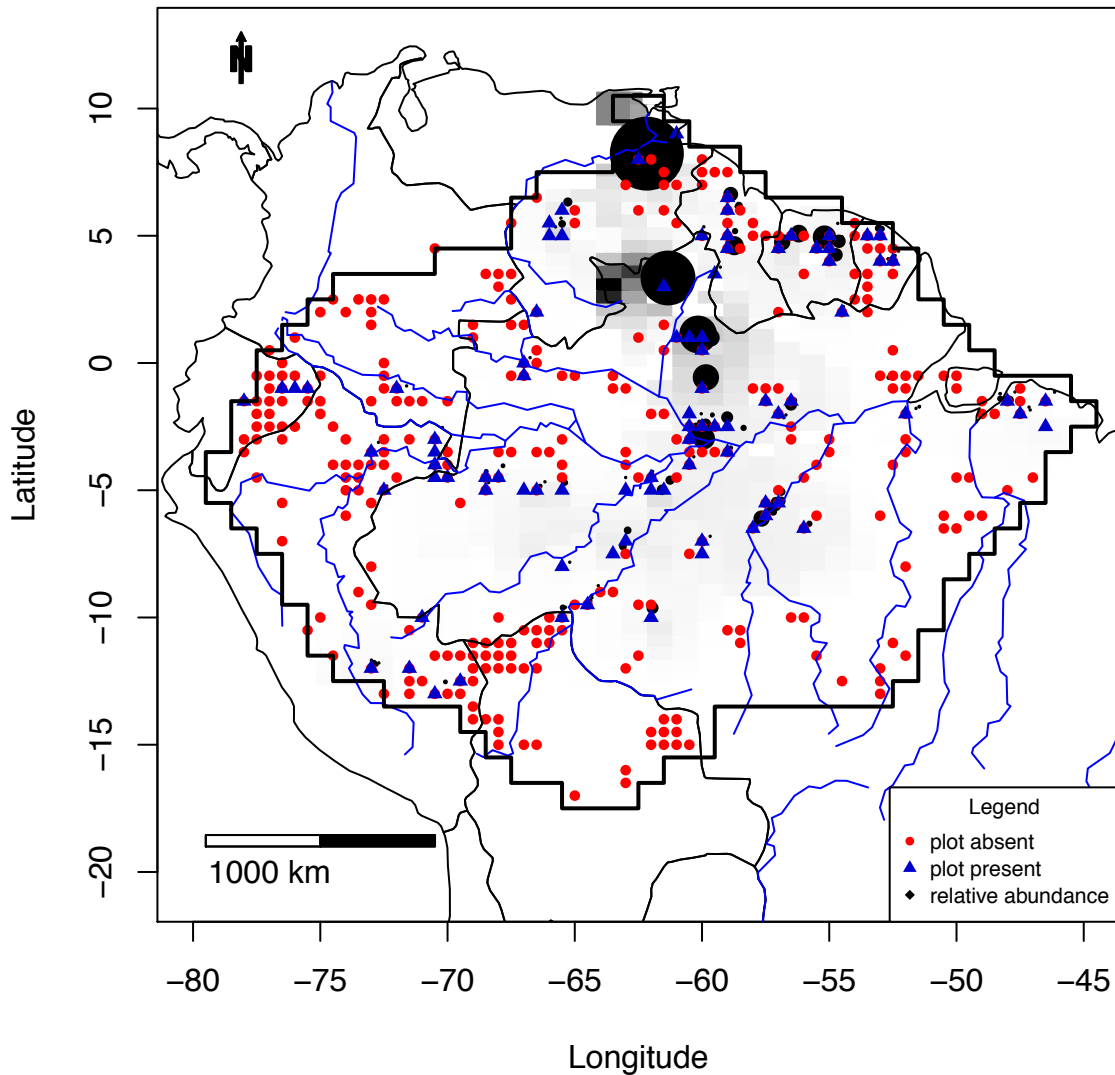

Figure S3\_39A Combined map of *Enterolobium schomburgkii*

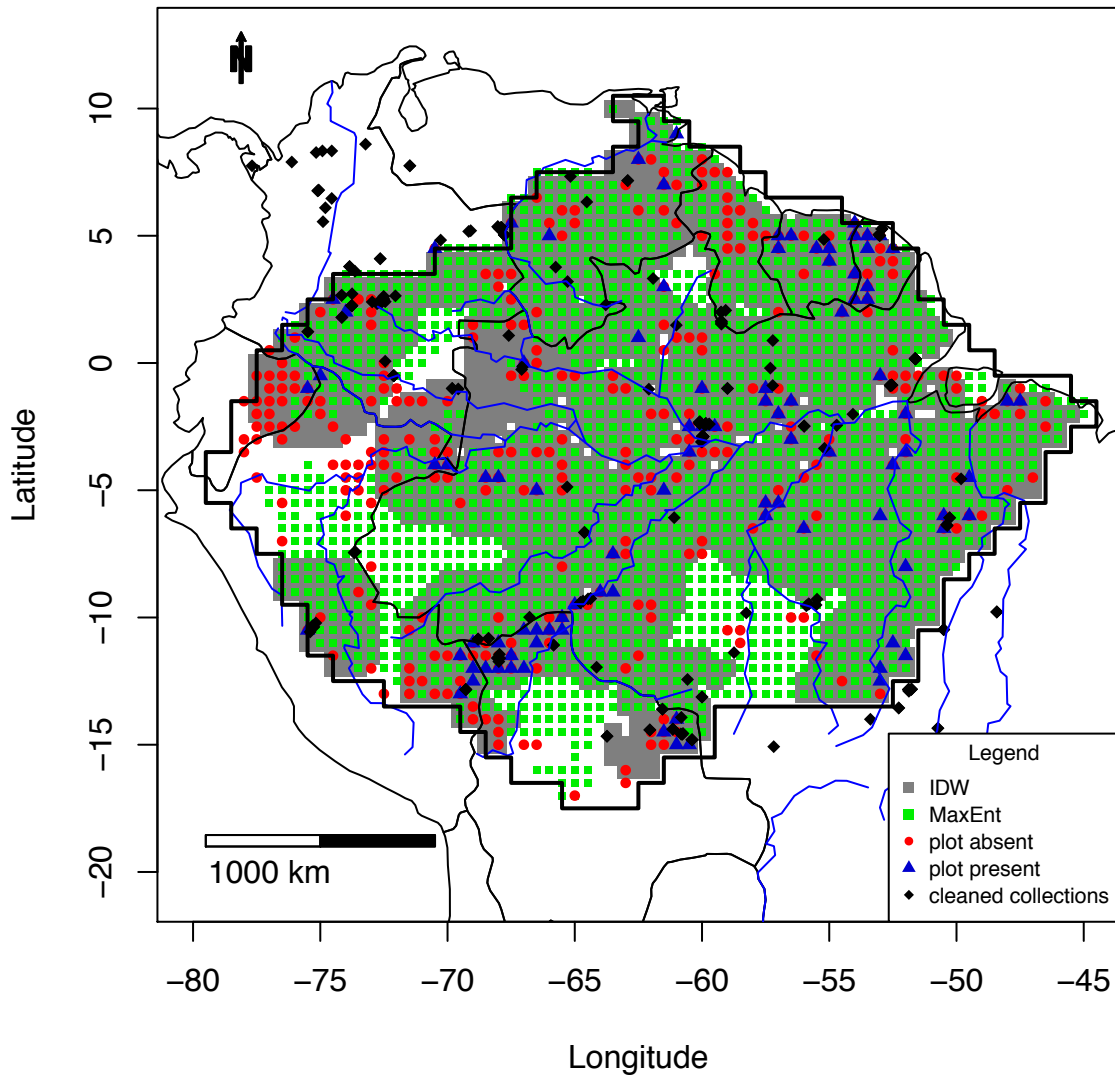

Figure S3\_39B MaxEnt map of *Enterolobium\_schomburgkii*

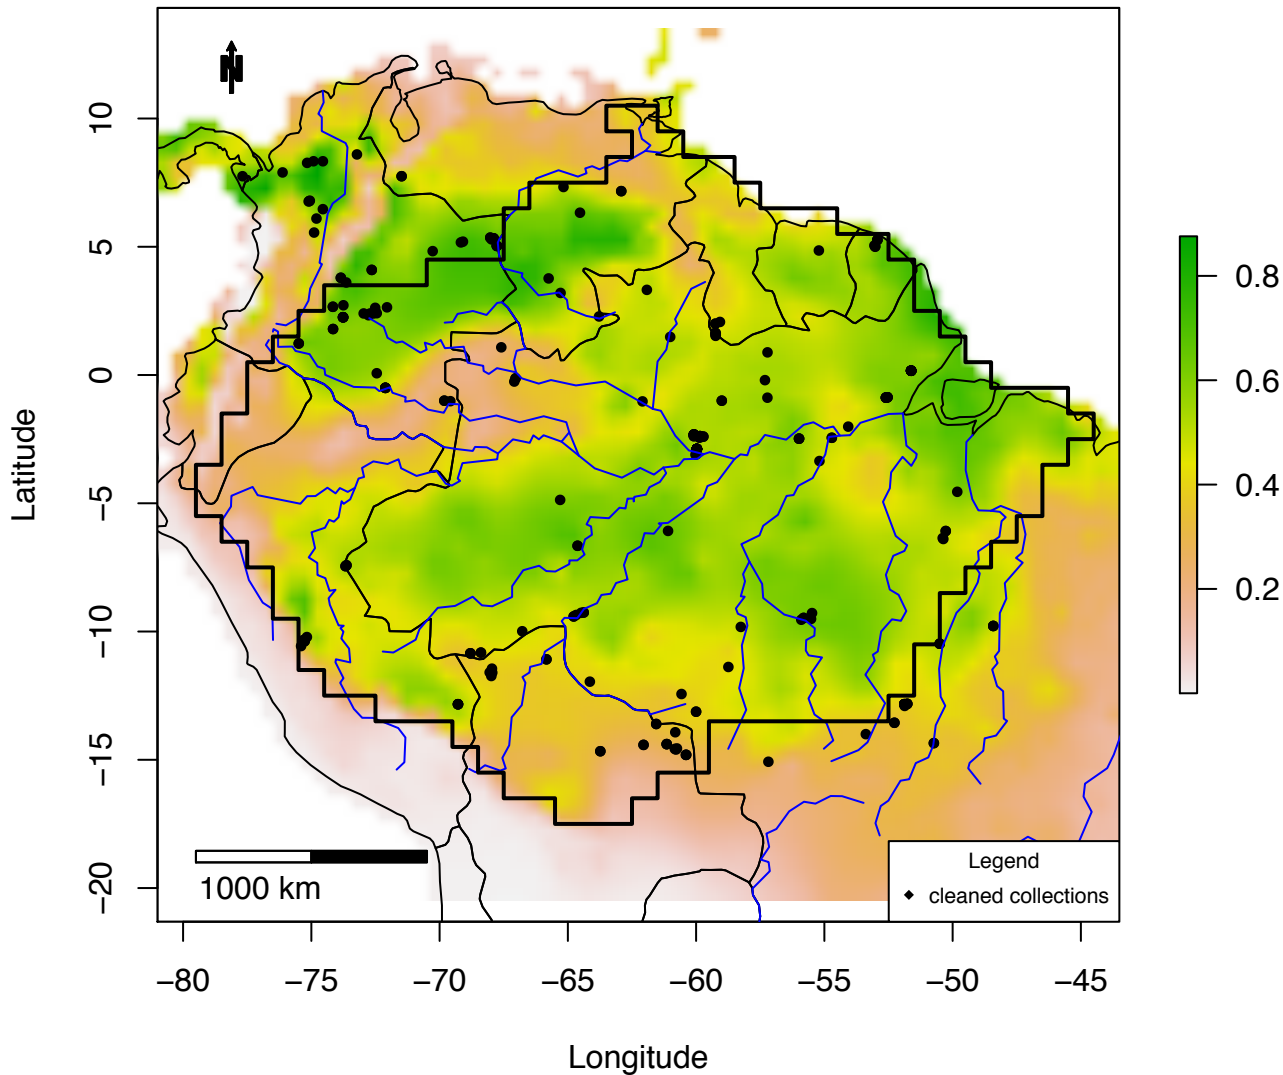

Figure S3\_39C IDW map of *Enterolobium schomburgkii*:  
plots = 0 – 0.09; IDW: 0 – 0.02

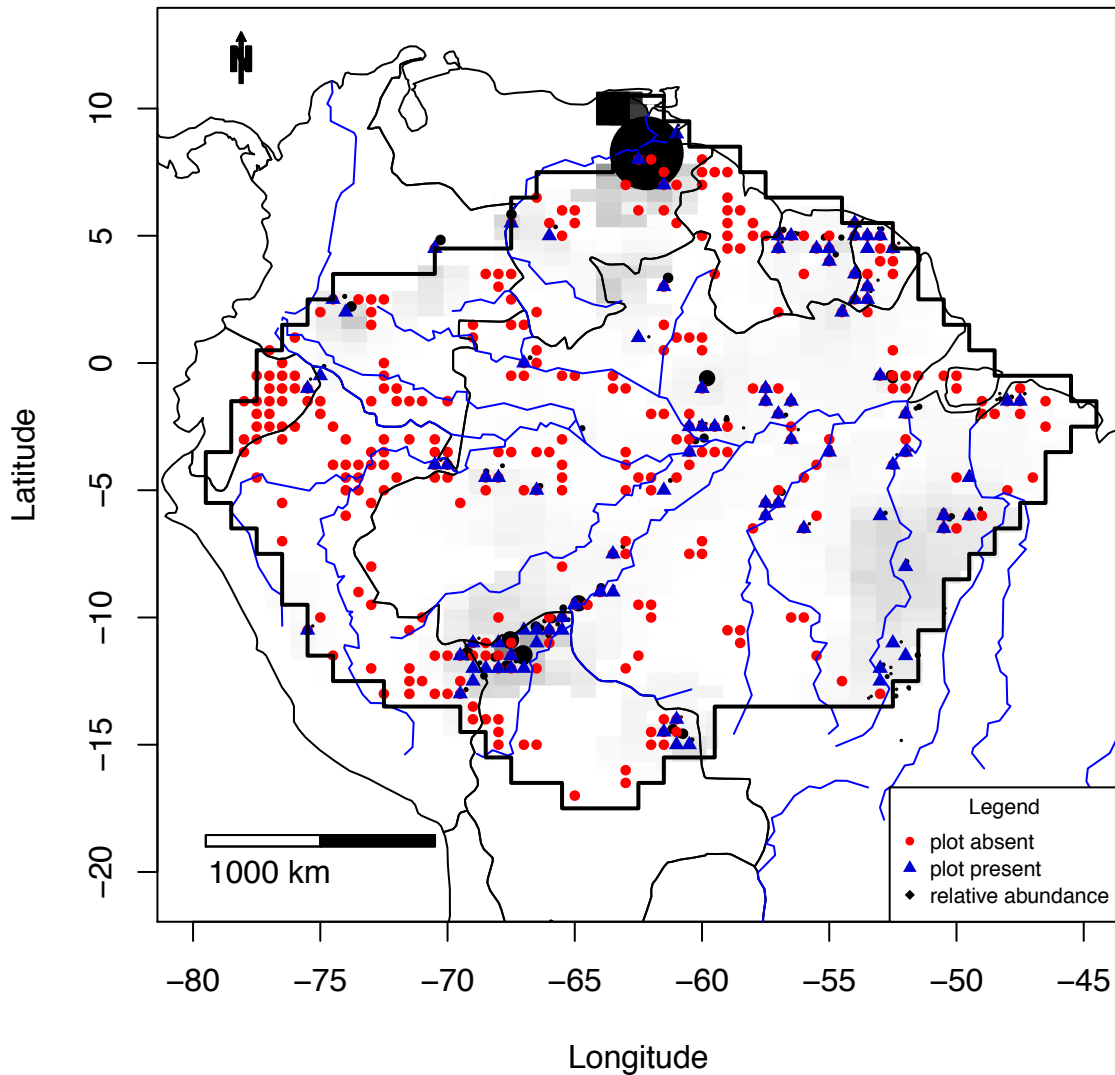

Figure S3\_40A Combined map of *Eperua\_falcata*

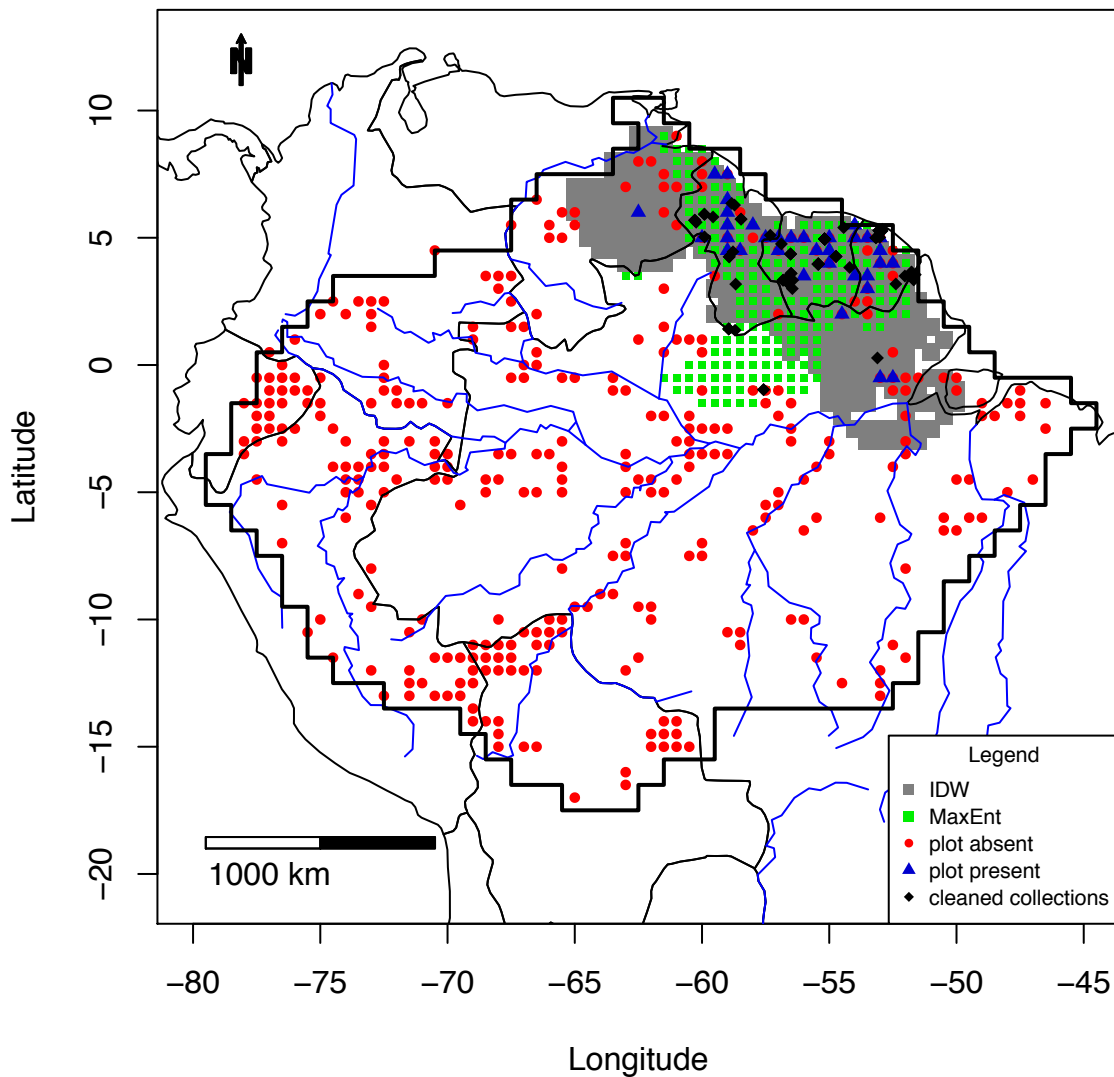

Figure S3\_40B MaxEnt map of *Eperua falcata*

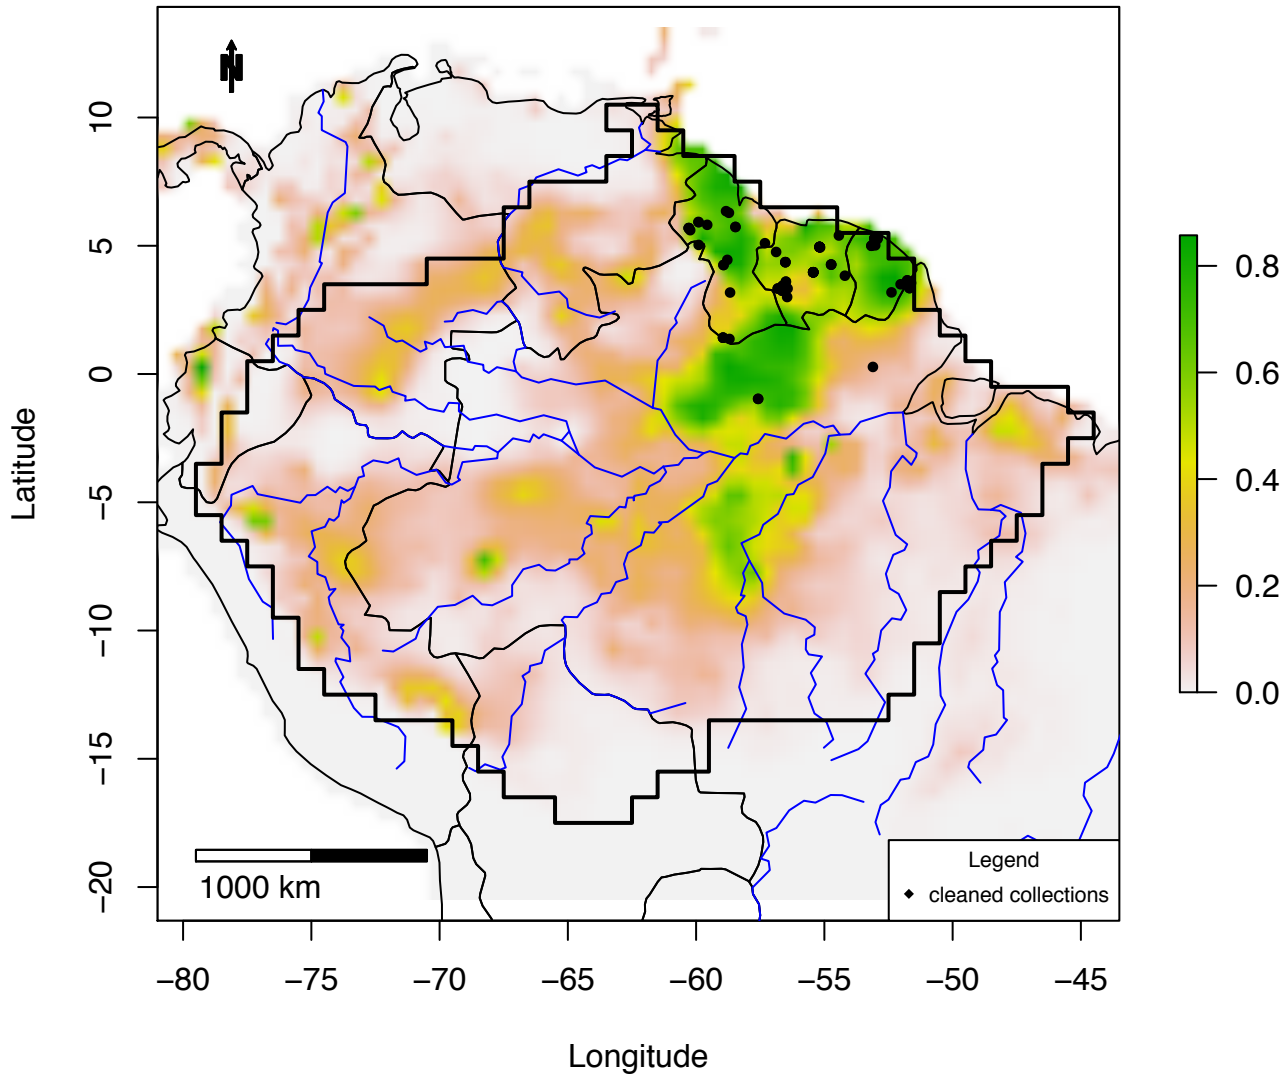



Figure S3\_40C IDW map of *Eperua falcata*:  
plots =0 – 0.73; IDW: 0 – 0.28

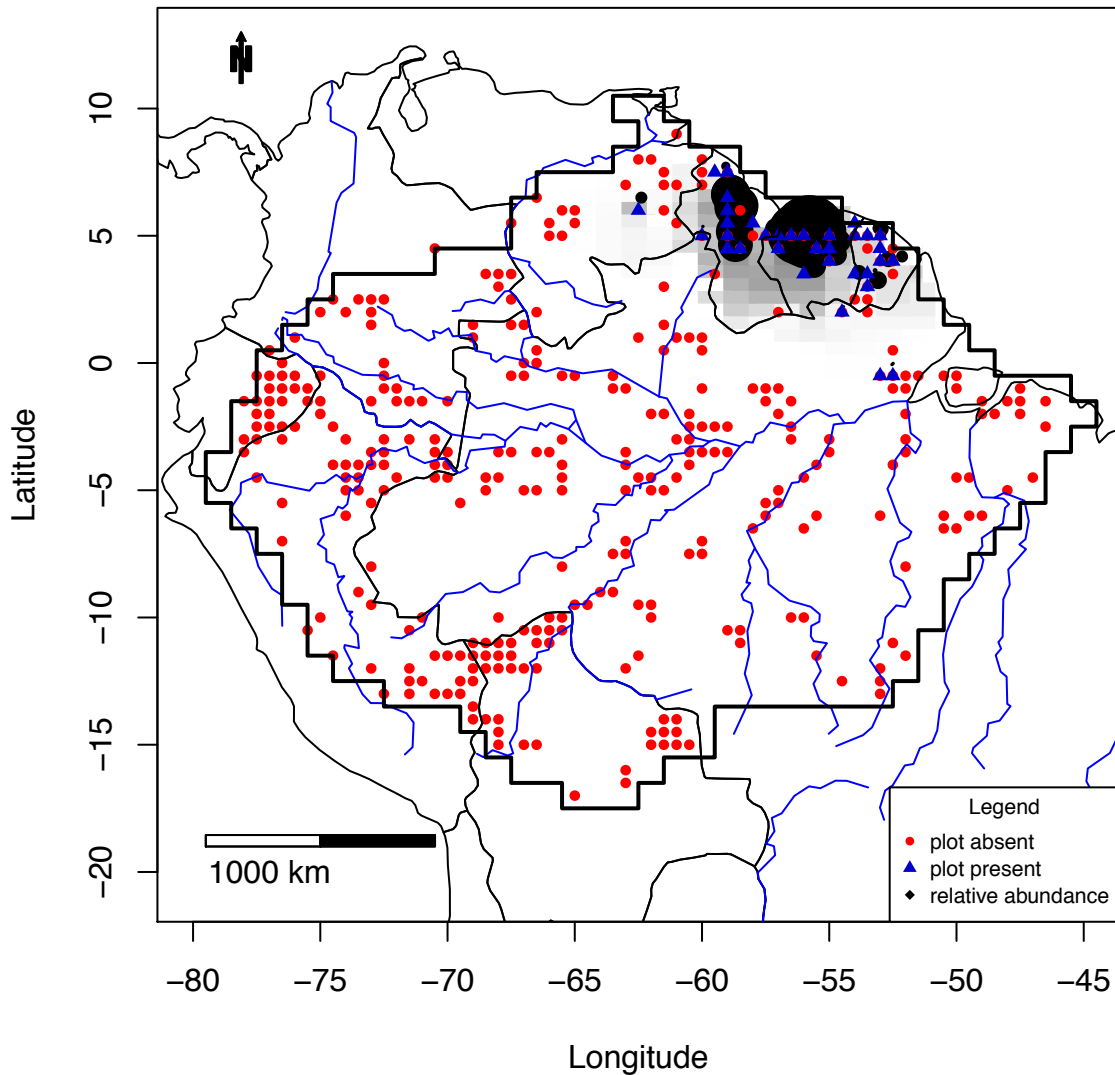

Figure S3\_41A Combined map of *Eperua grandiflora*

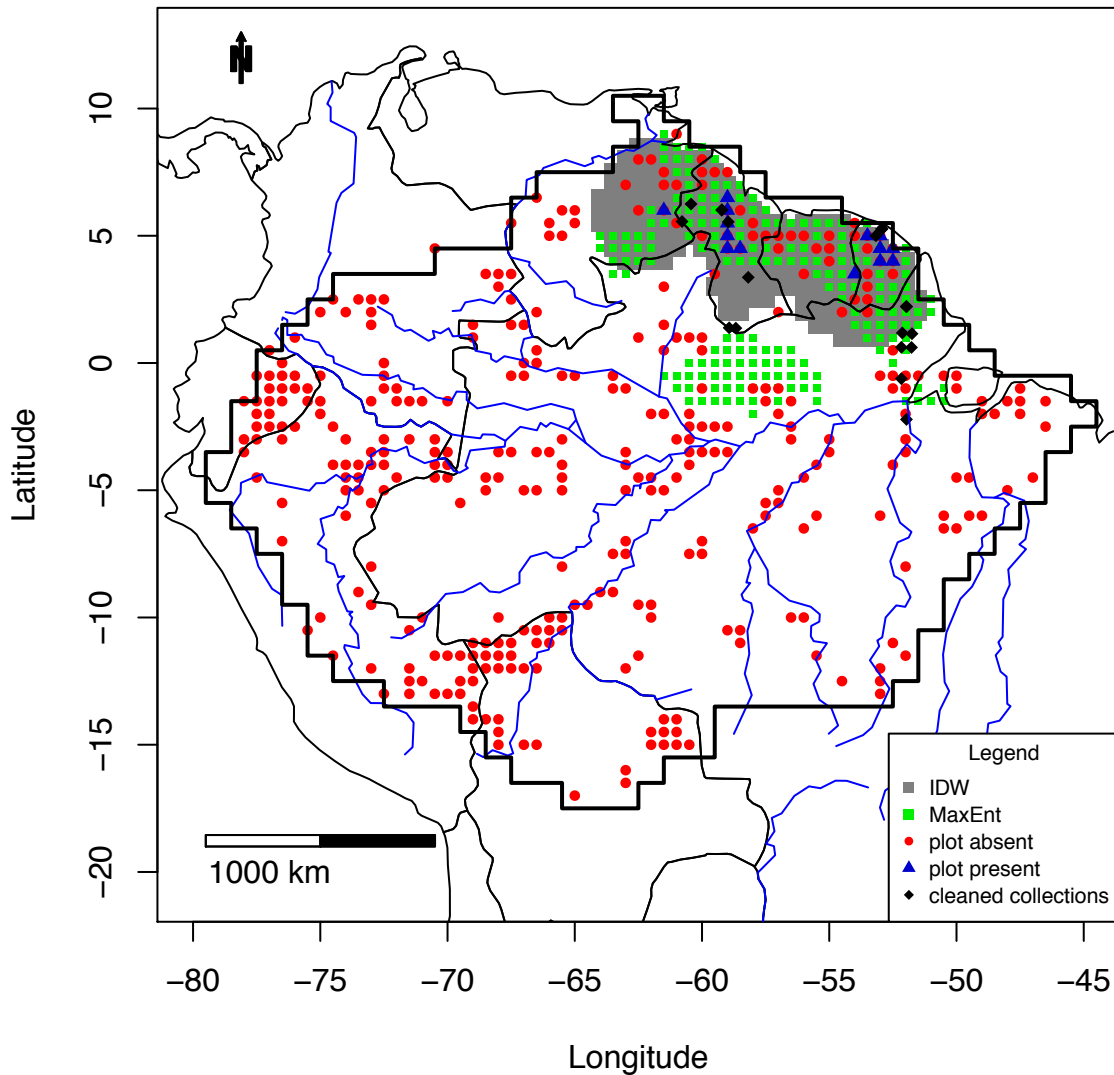

Figure S3\_41B MaxEnt map of *Eperua grandiflora*

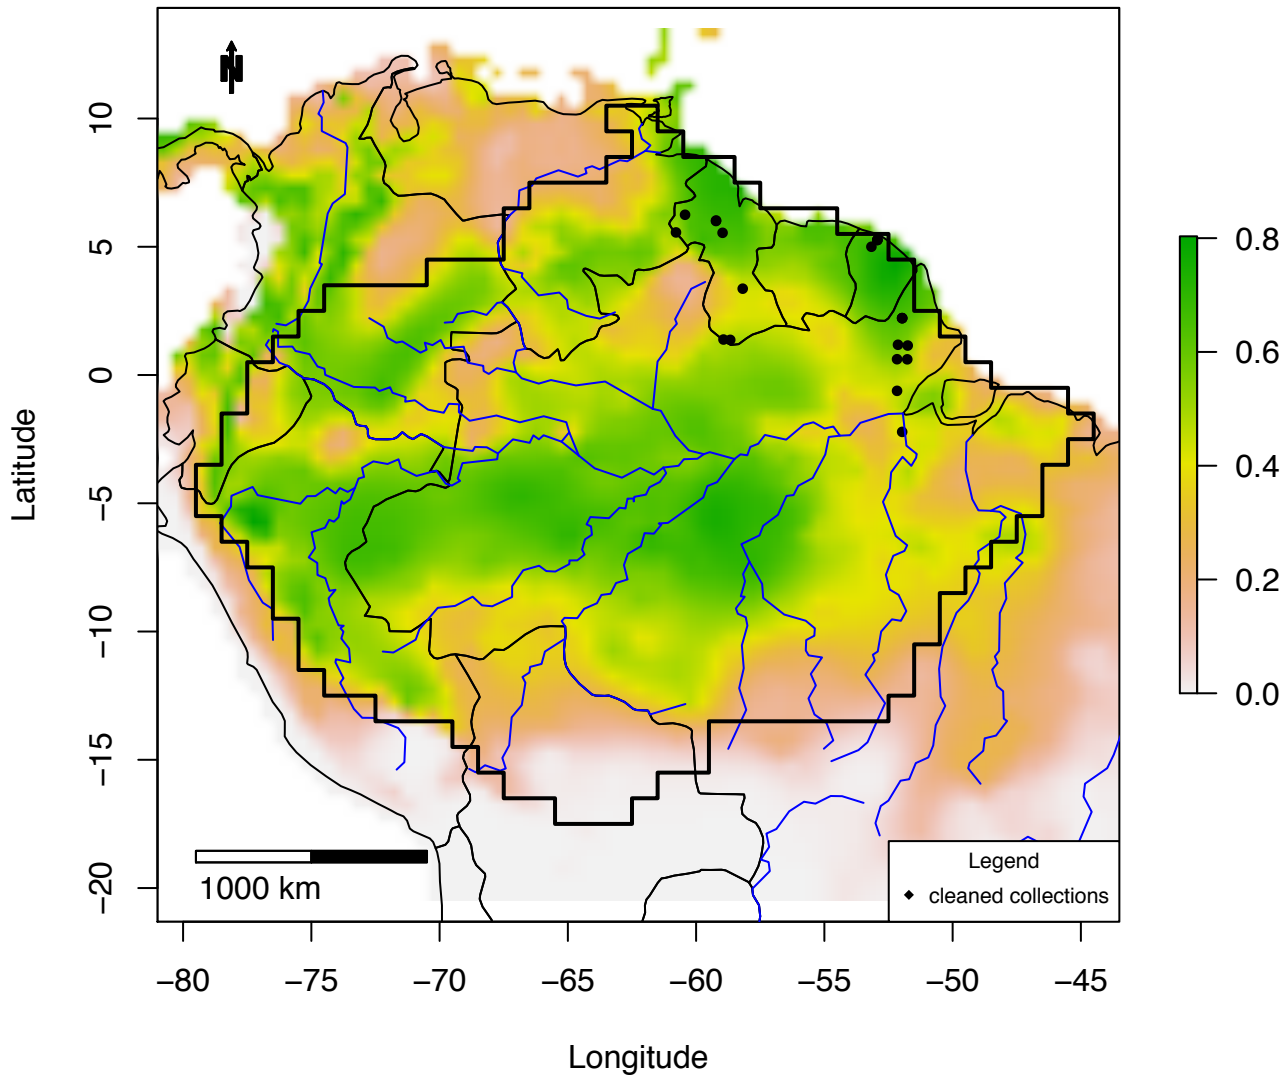

**Figure S3\_41C IDW map of *Eperua grandiflora*:**  
plots =0 – 0.47; IDW: 0 – 0.07

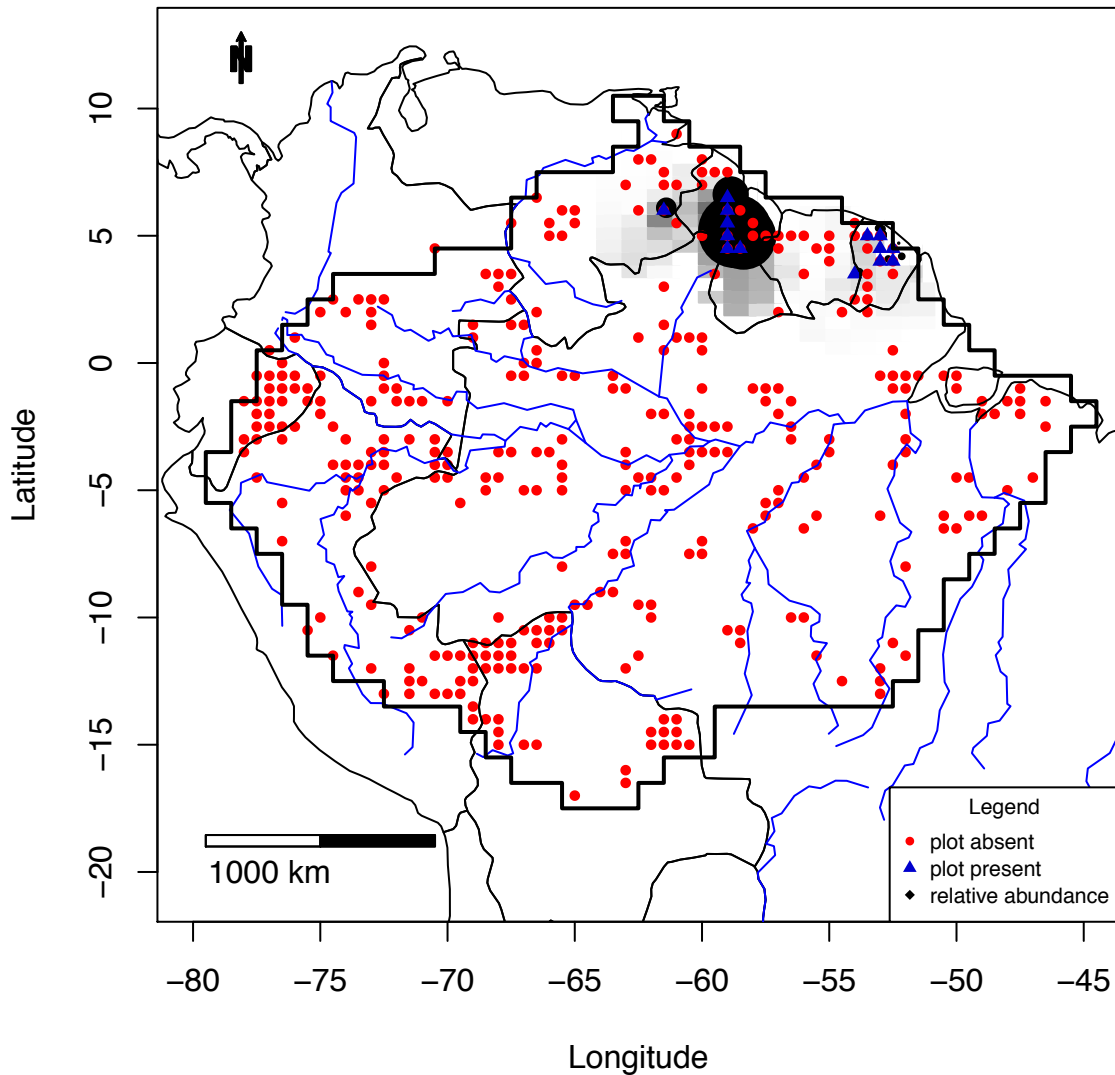

Figure S3\_42A Combined map of *Eperua leucantha*

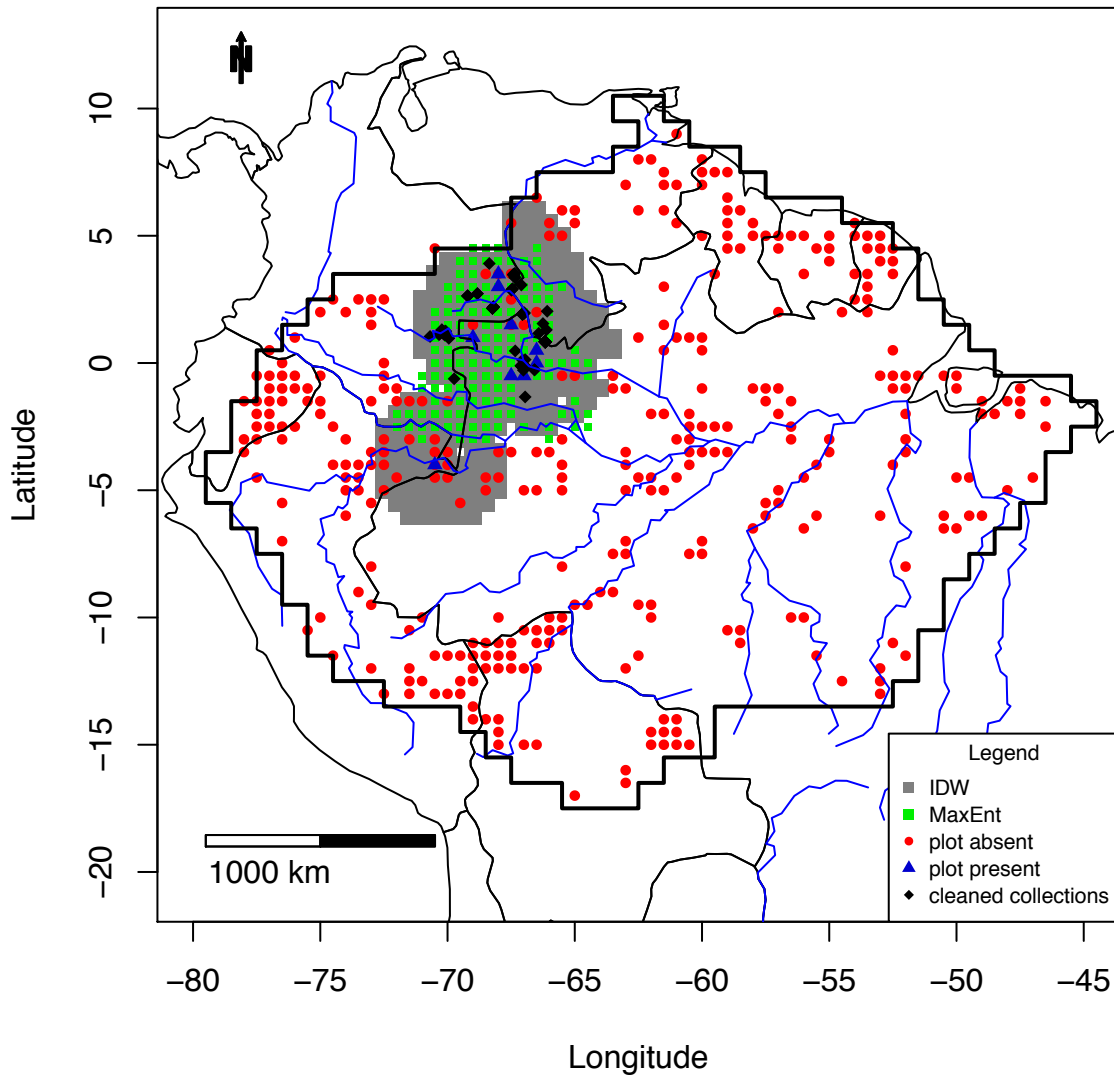

Figure S3\_42B MaxEnt map of *Eperua leucantha*

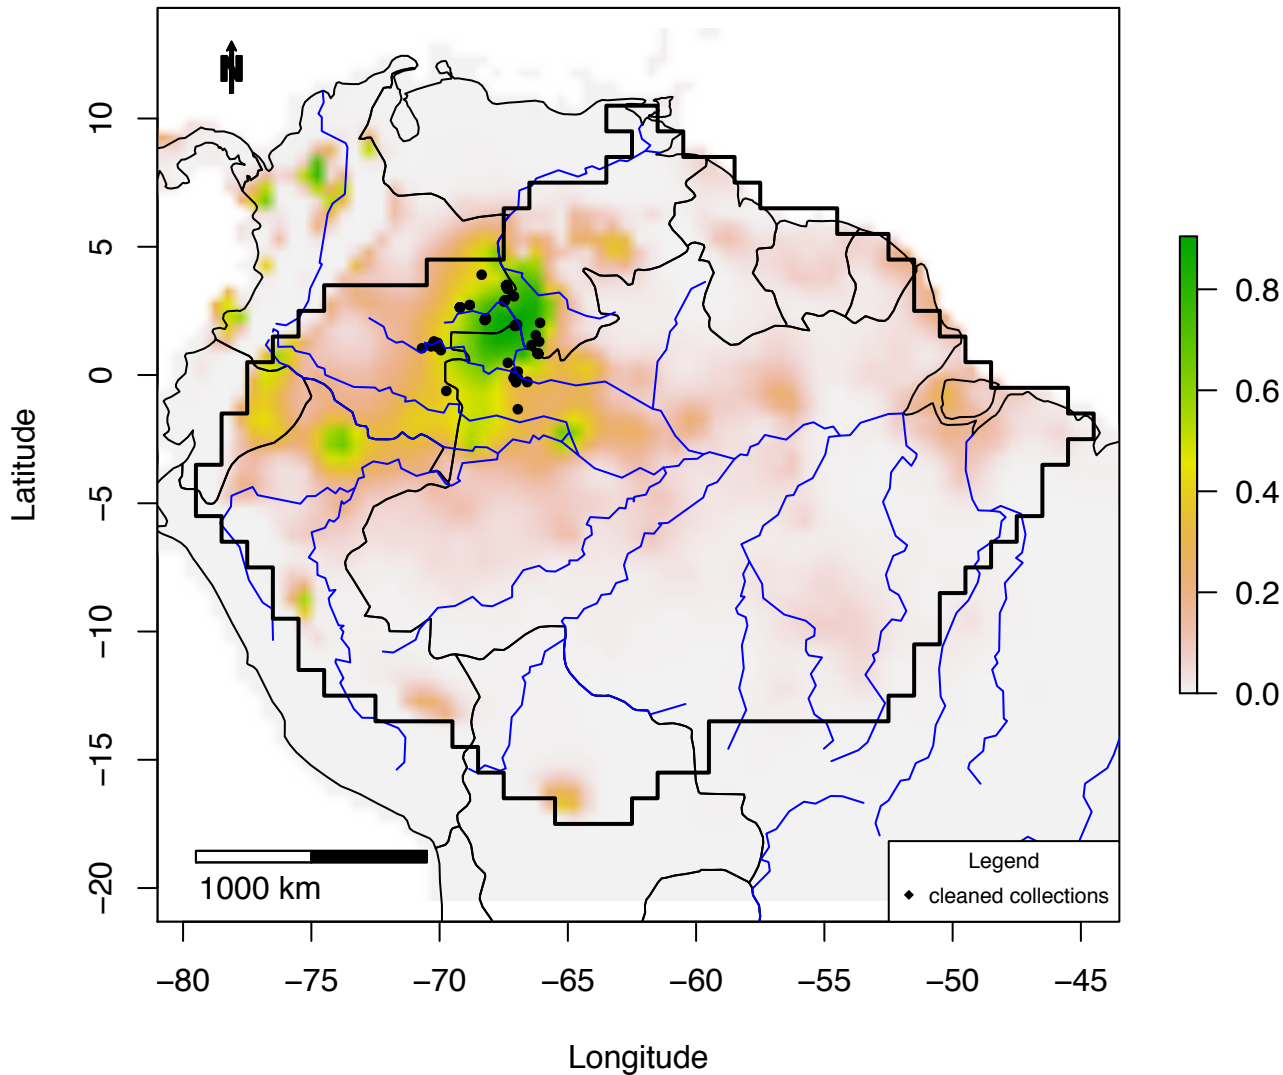

**Figure S3\_42C IDW map of *Eperua leucantha*:**  
plots =0 – 0.49; IDW: 0 – 0.24

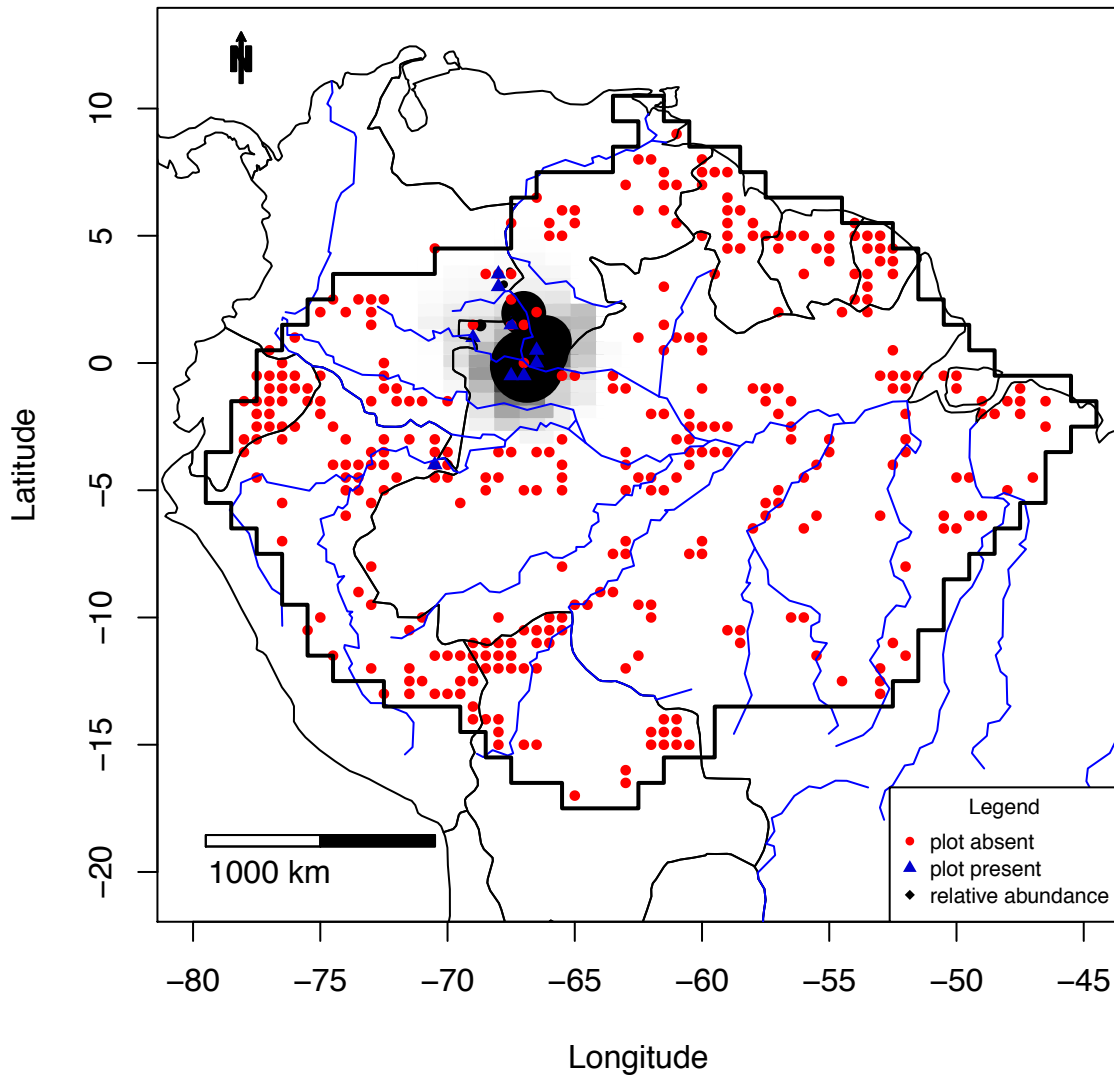

Figure S3\_43A Combined map of *Eperua\_purpurea*

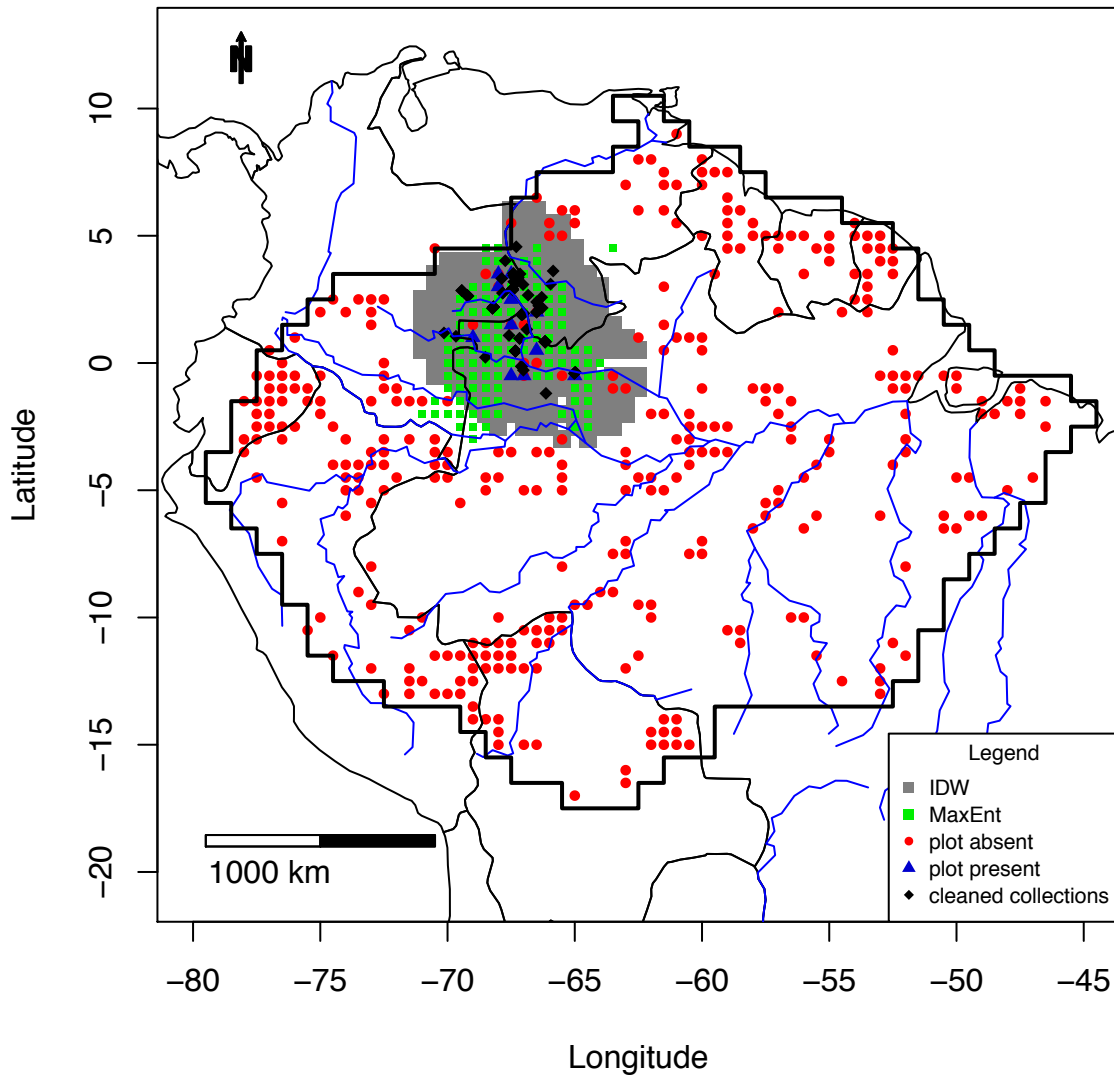



Figure S3\_43B MaxEnt map of *Eperua\_purpurea*

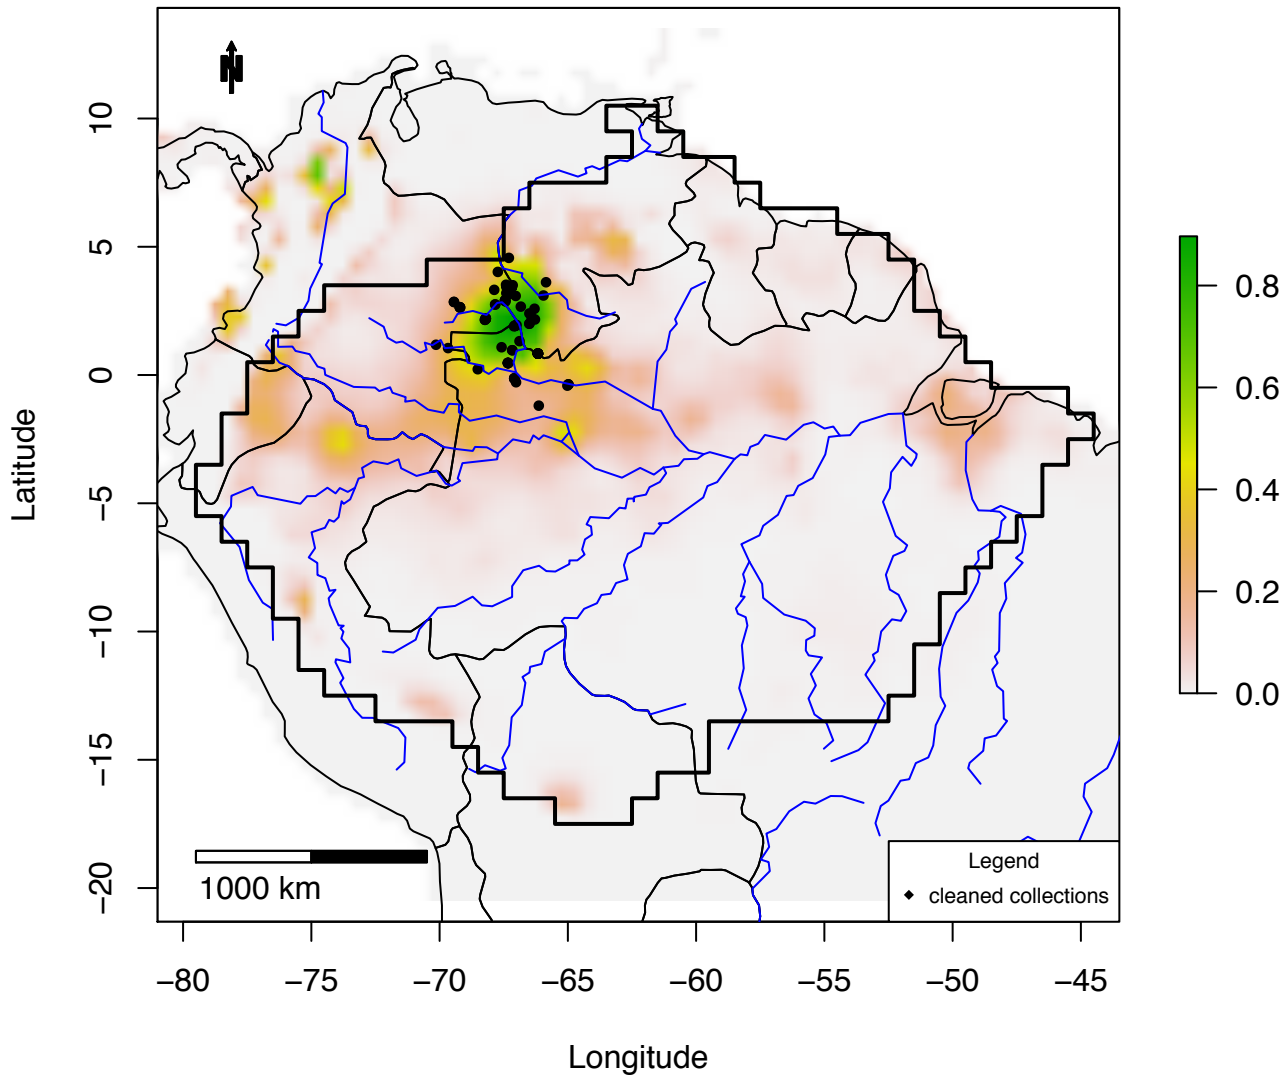

Figure S3\_43C IDW map of *Eperua\_purpurea*:  
plots =0 – 0.2; IDW: 0 – 0.07

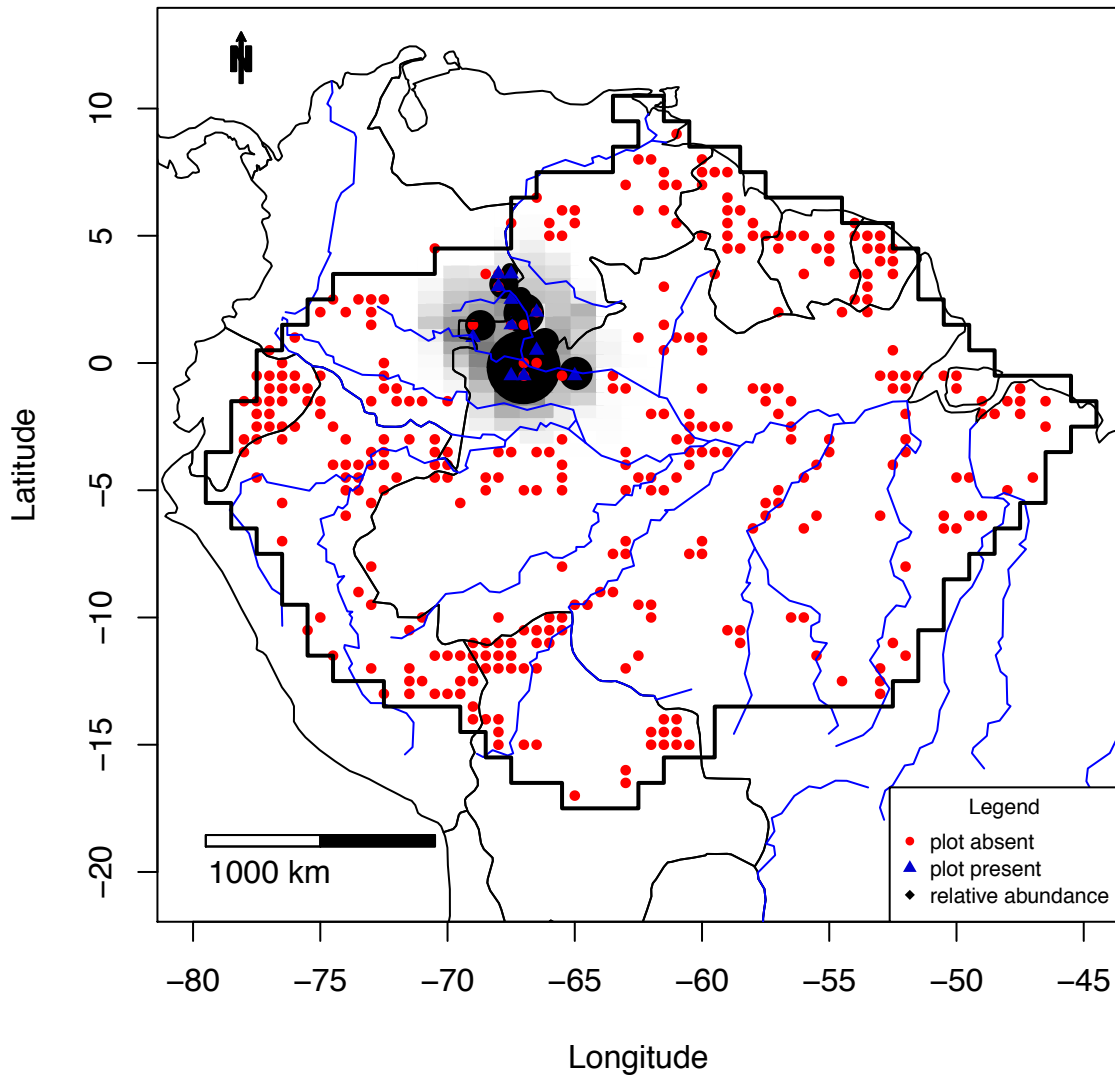

Figure S3\_44A Combined map of *Erisma\_uncinatum*

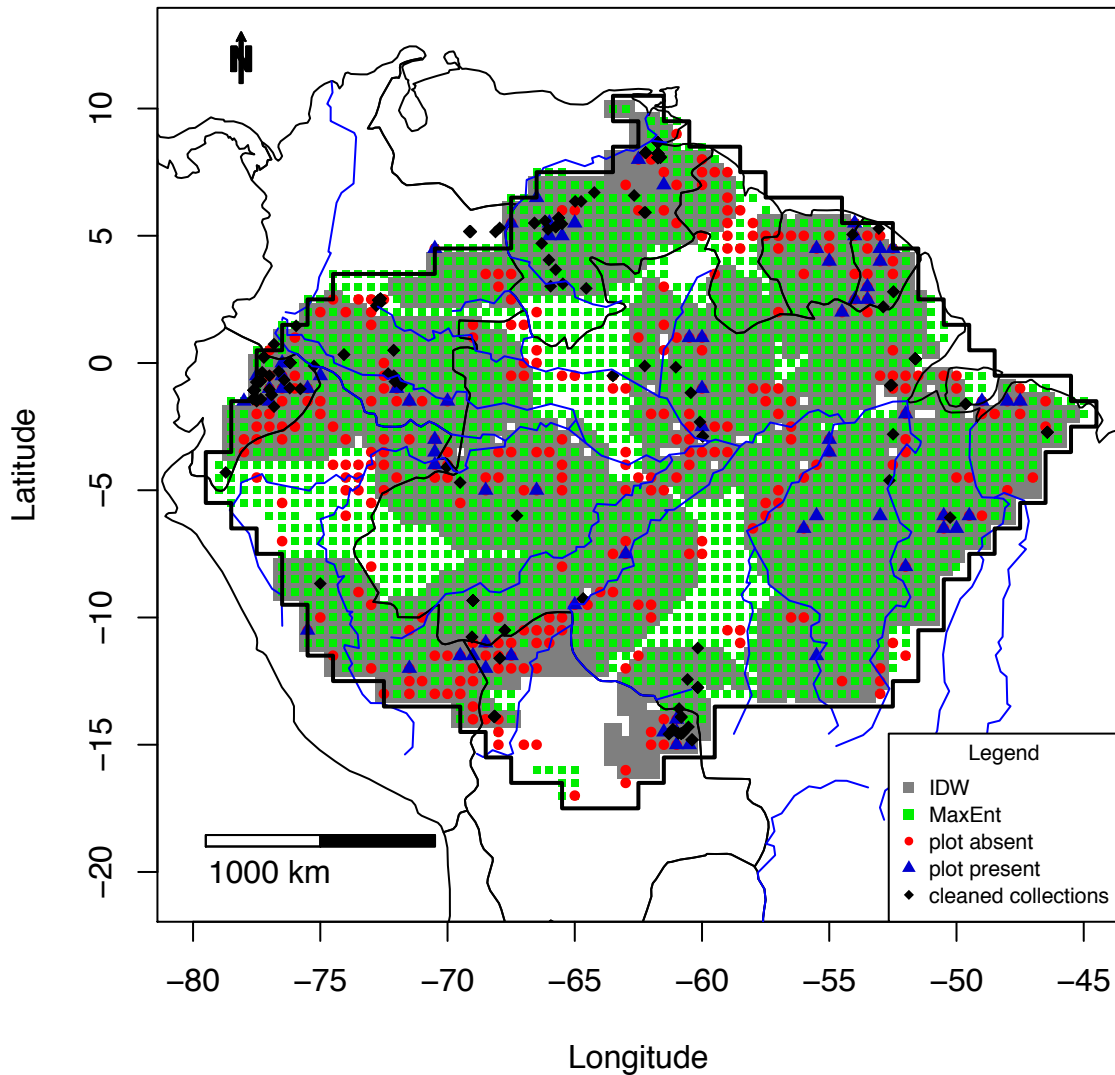

Figure S3\_44B MaxEnt map of *Erisma\_uncinatum*

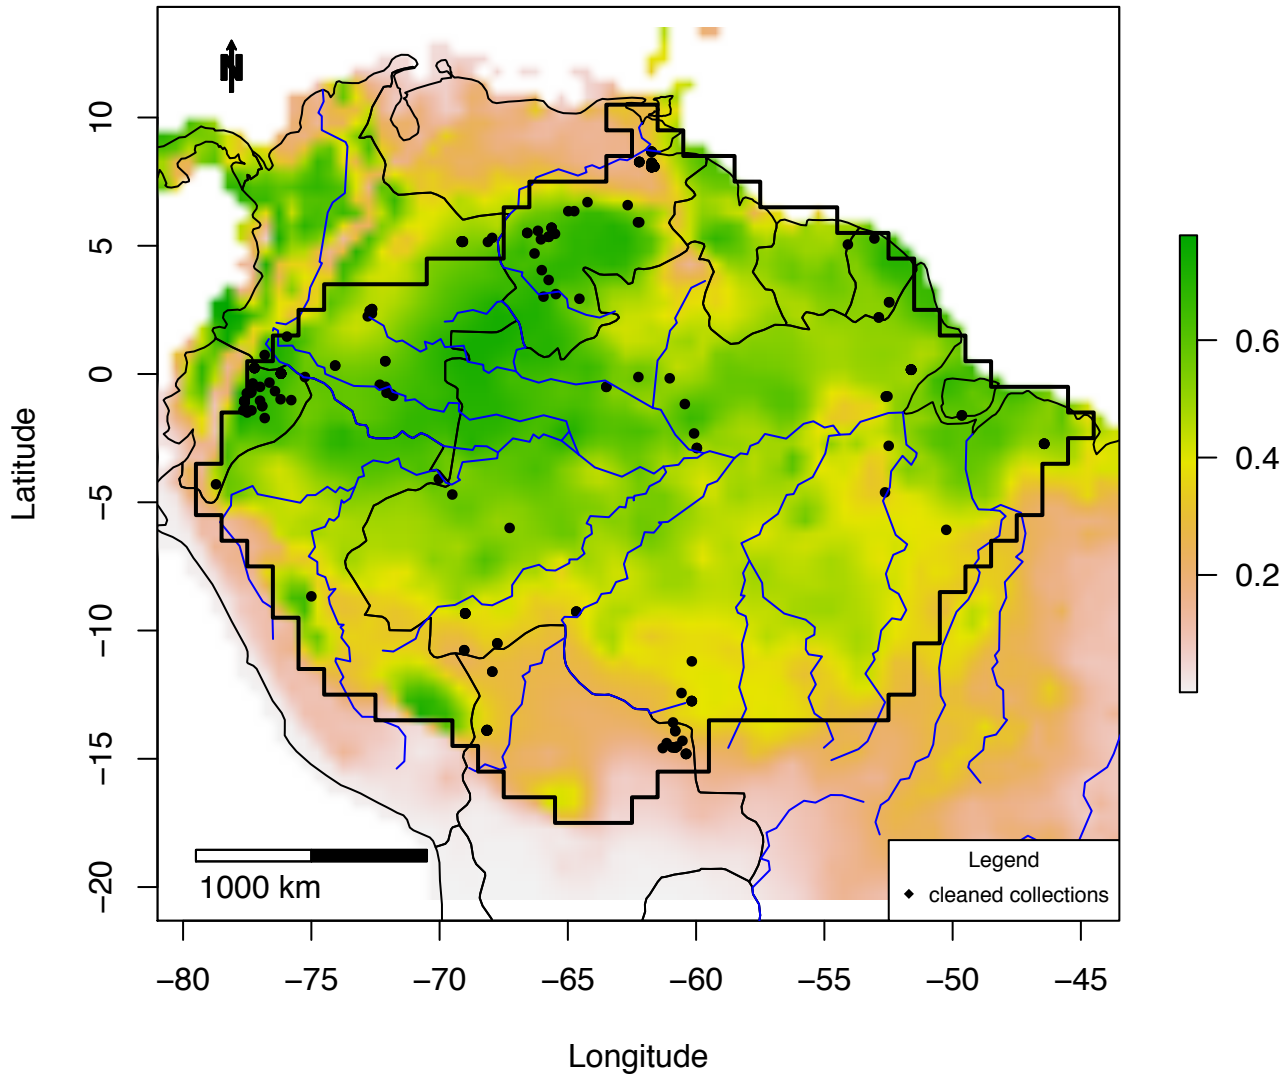

Figure S3\_44C IDW map of *Erisma uncinatum*:  
plots = 0 – 0.11; IDW: 0 – 0.05

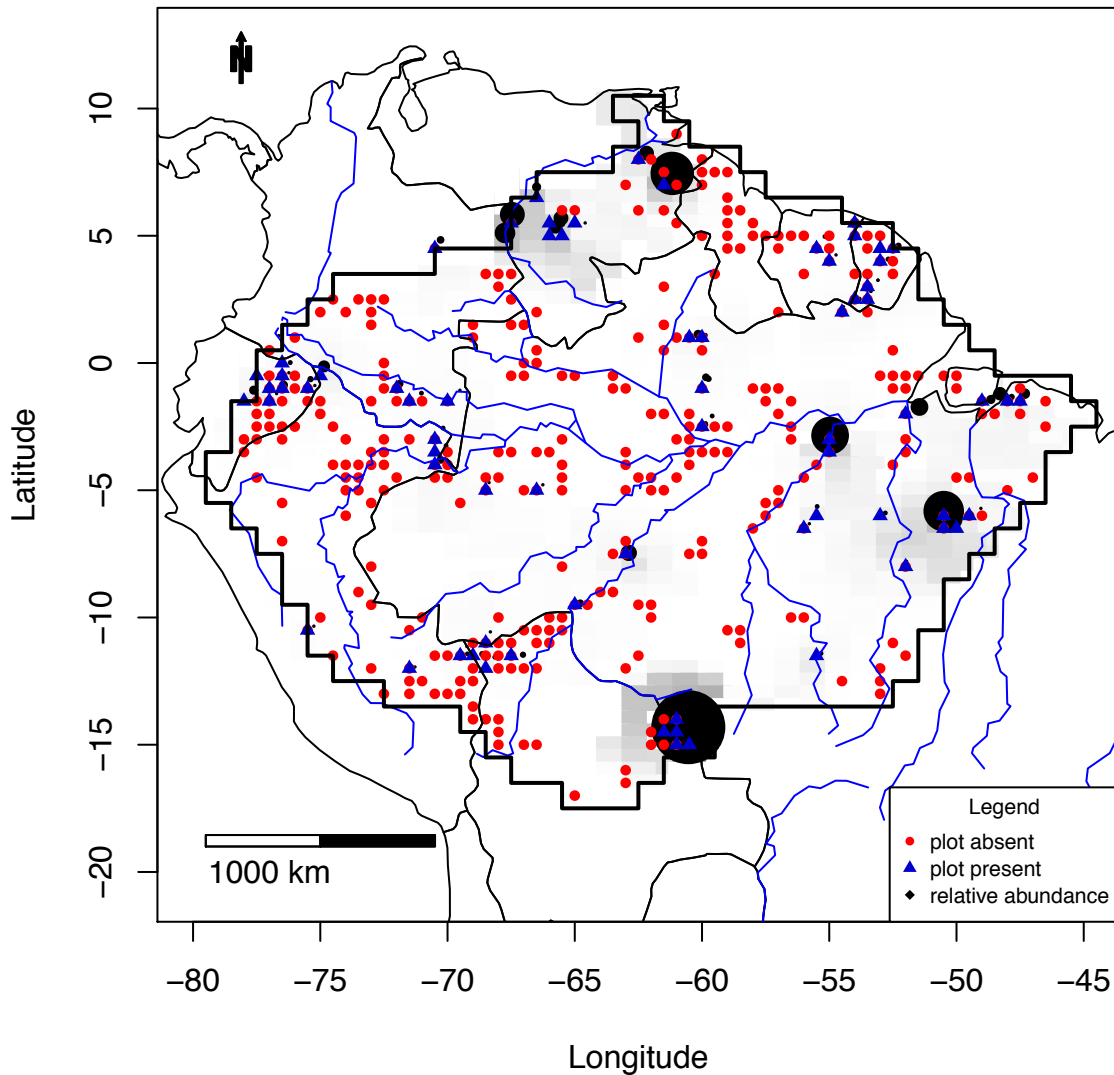

Figure S3\_45A Combined map of *Eschweilera albiflora*

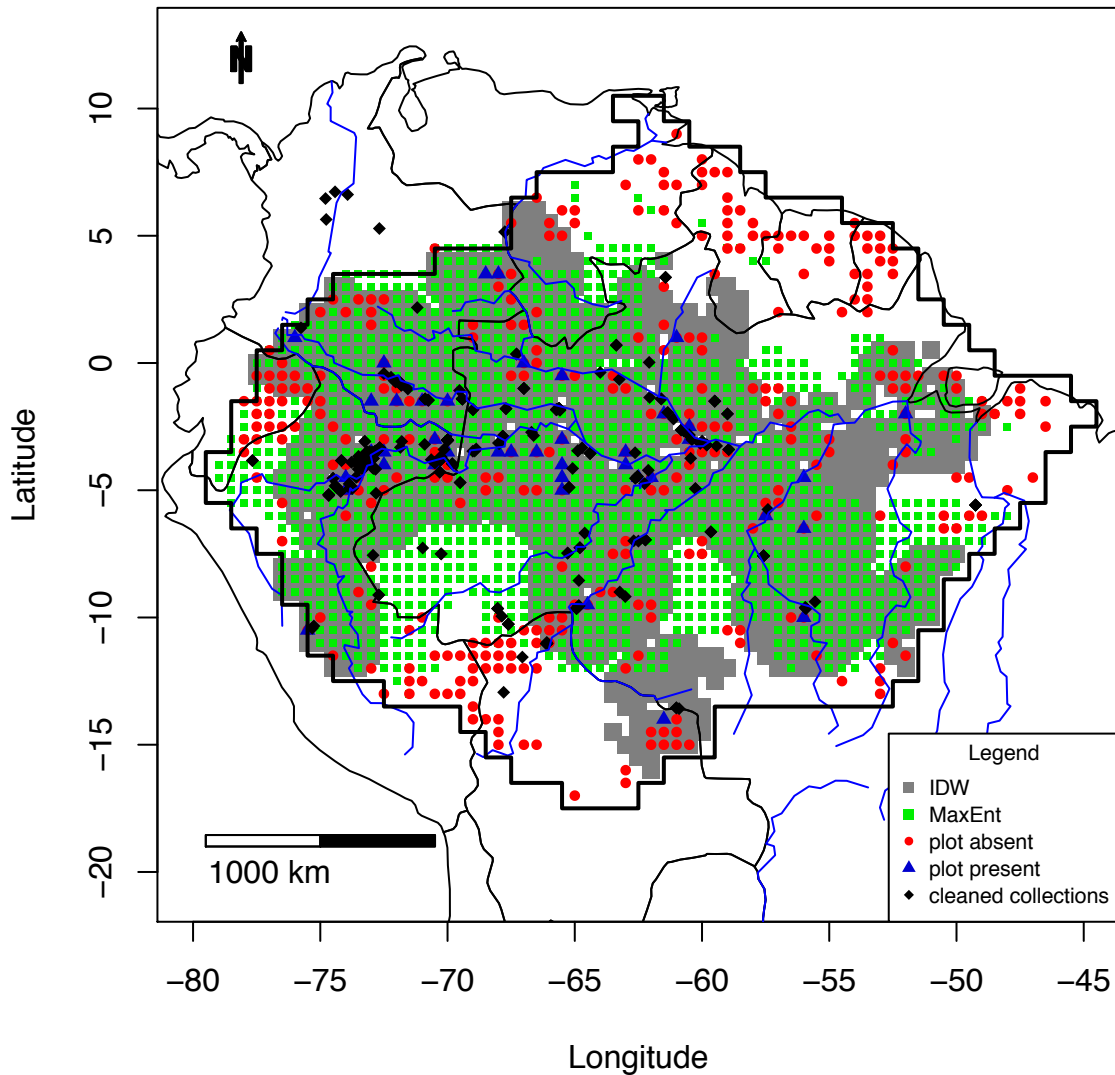

Figure S3\_45B MaxEnt map of *Eschweilera albiflora*

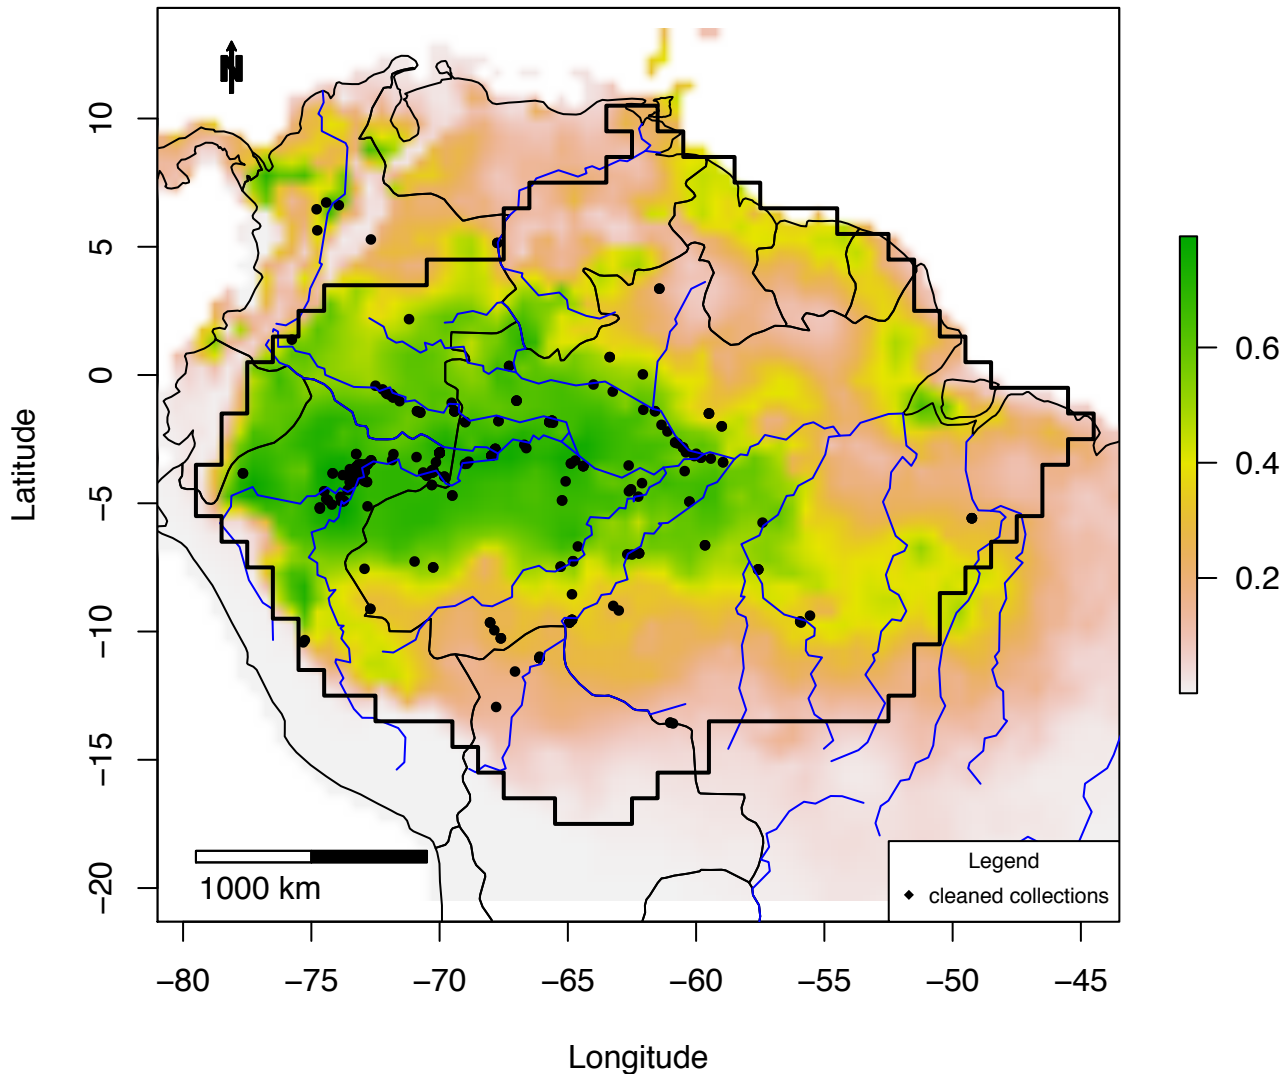

Figure S3\_45C IDW map of *Eschweilera albiflora*:  
plots =0 – 0.22; IDW: 0 – 0.11

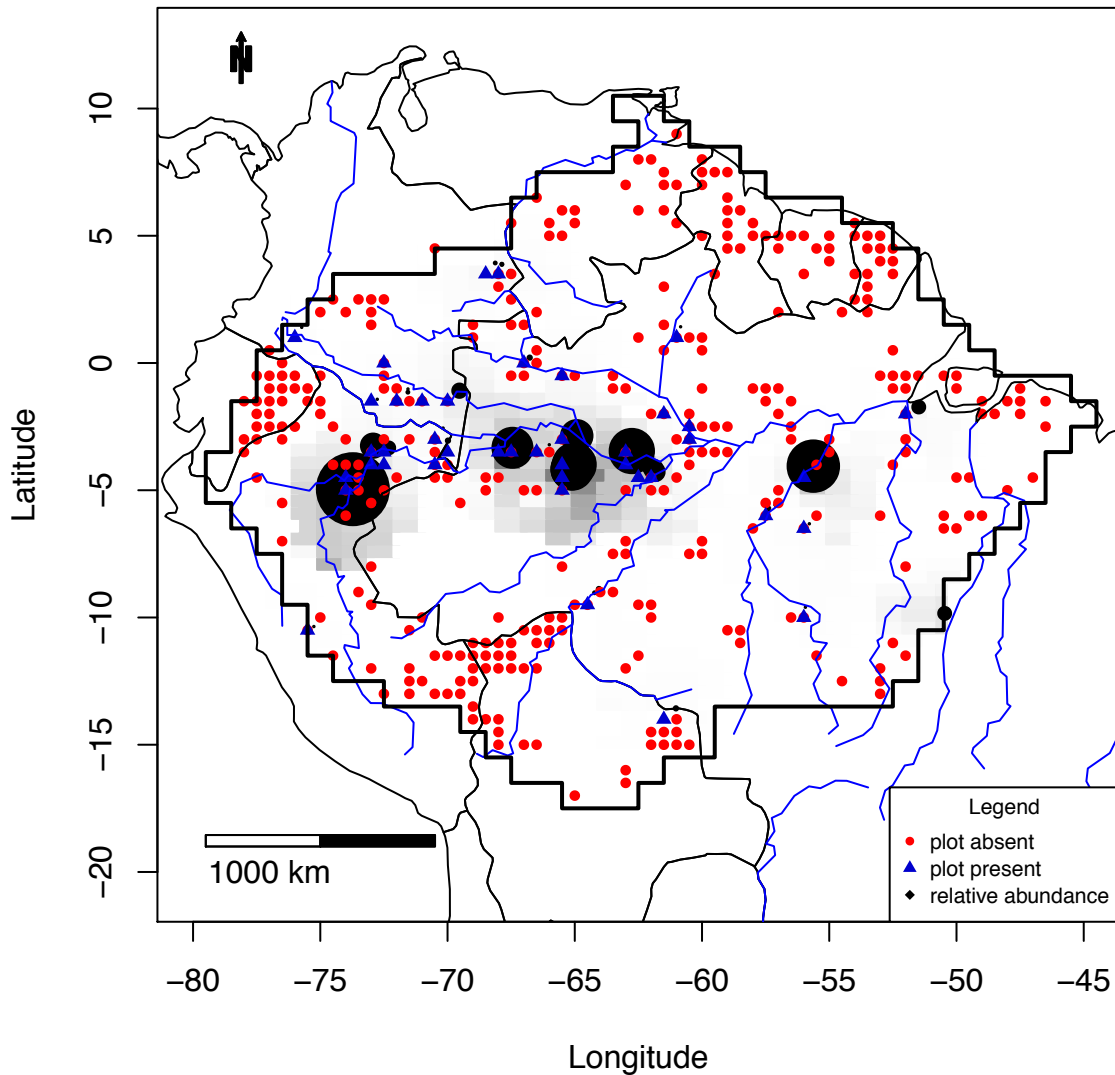



Figure S3\_46A Combined map of *Eschweilera amazonica*

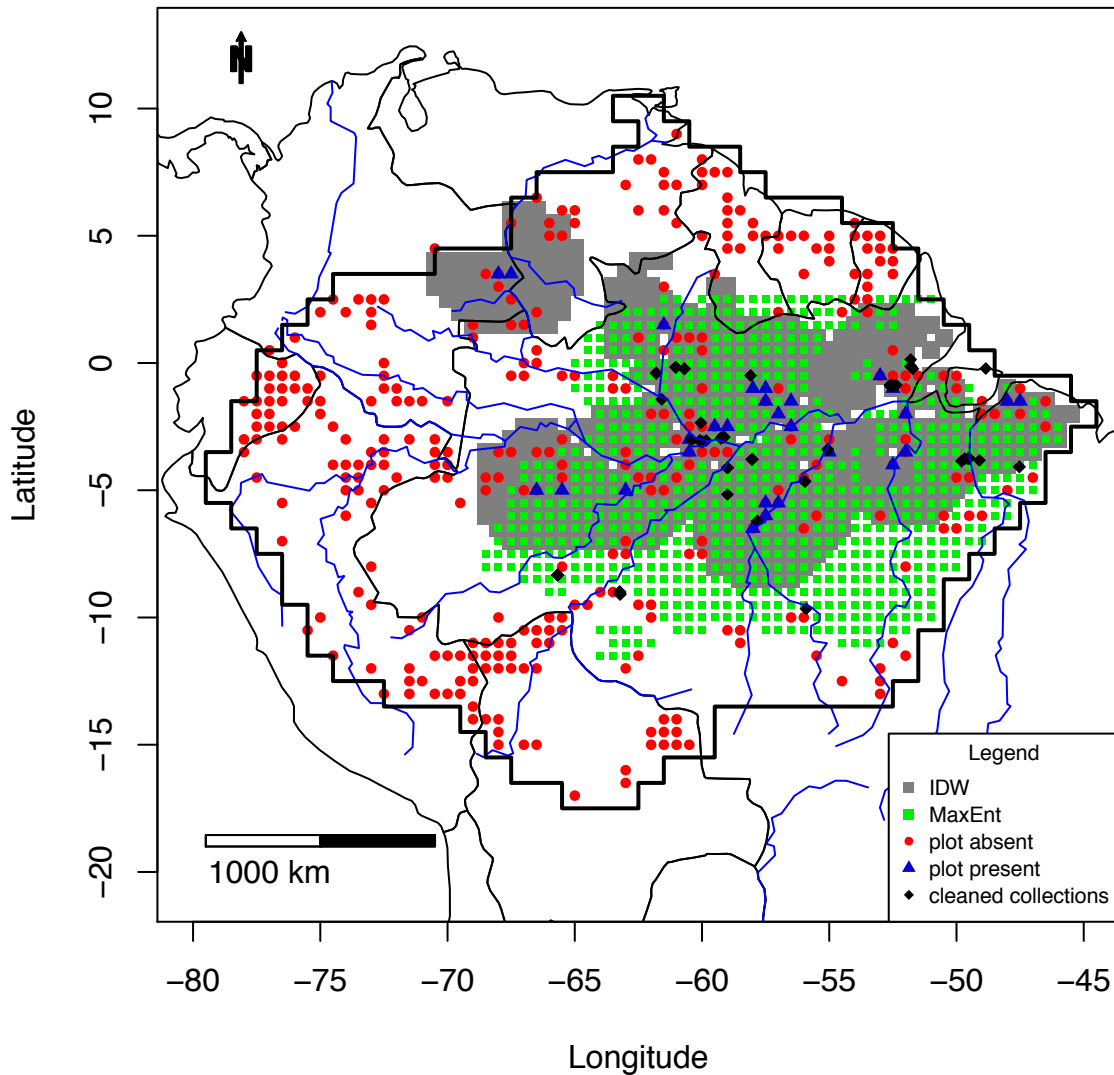

Figure S3\_46B MaxEnt map of *Eschweilera amazonica*

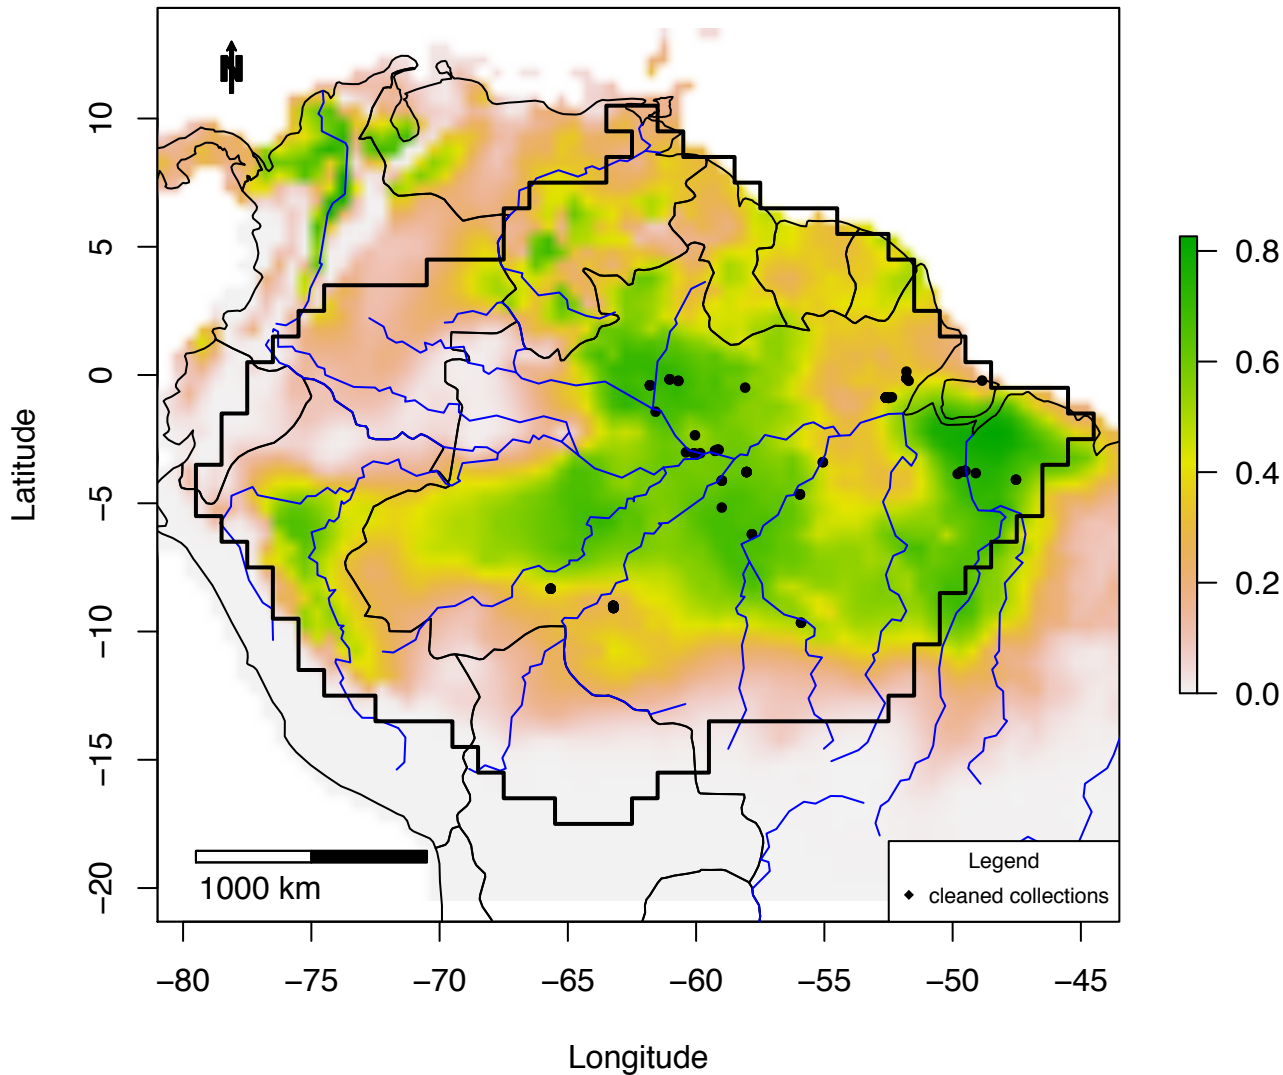

Figure S3\_46C IDW map of *Eschweilera amazonica*:  
plots = 0 – 0.16; IDW: 0 – 0.03

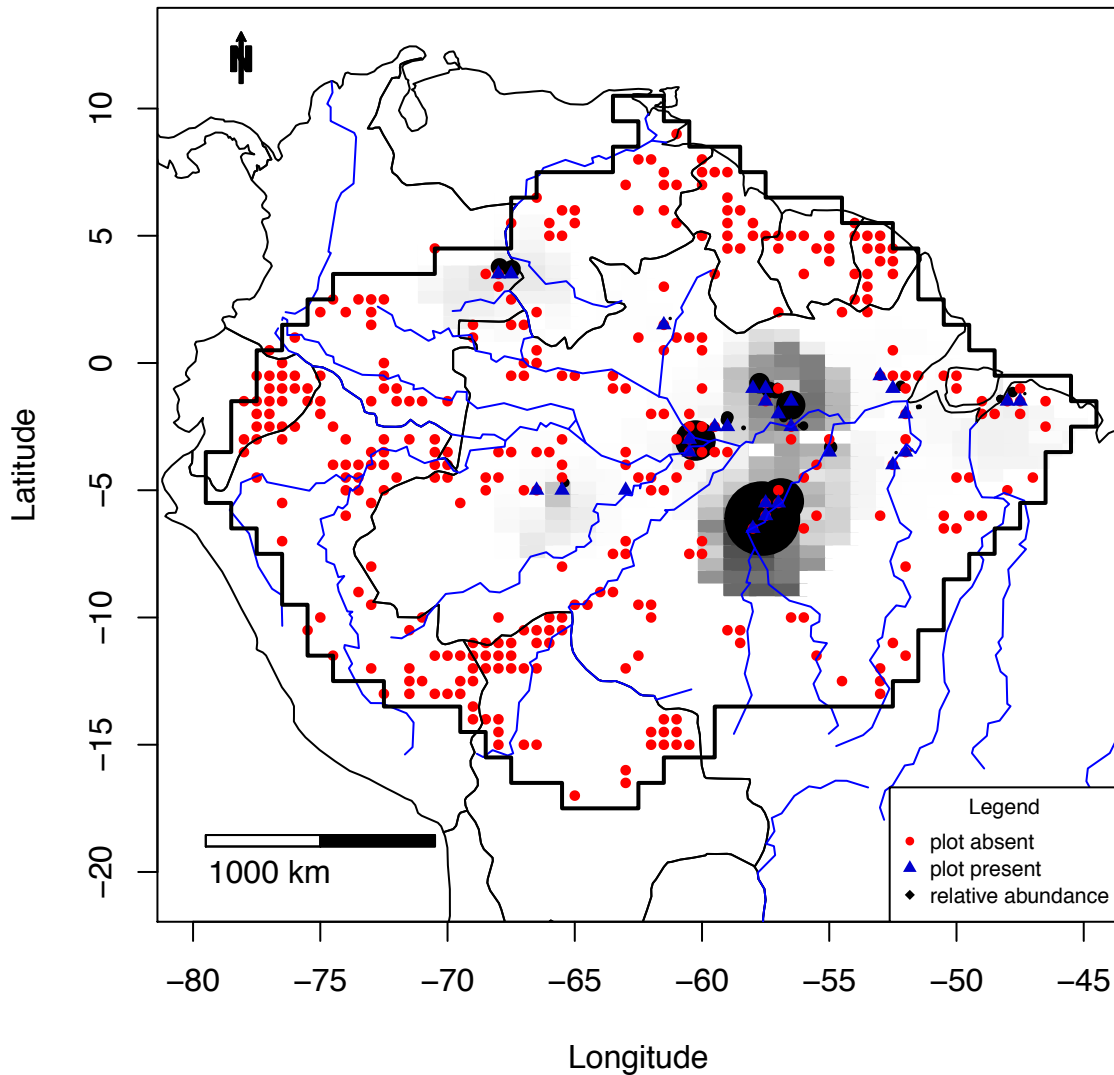

Figure S3\_47A Combined map of *Eschweilera\_atropetiolata*

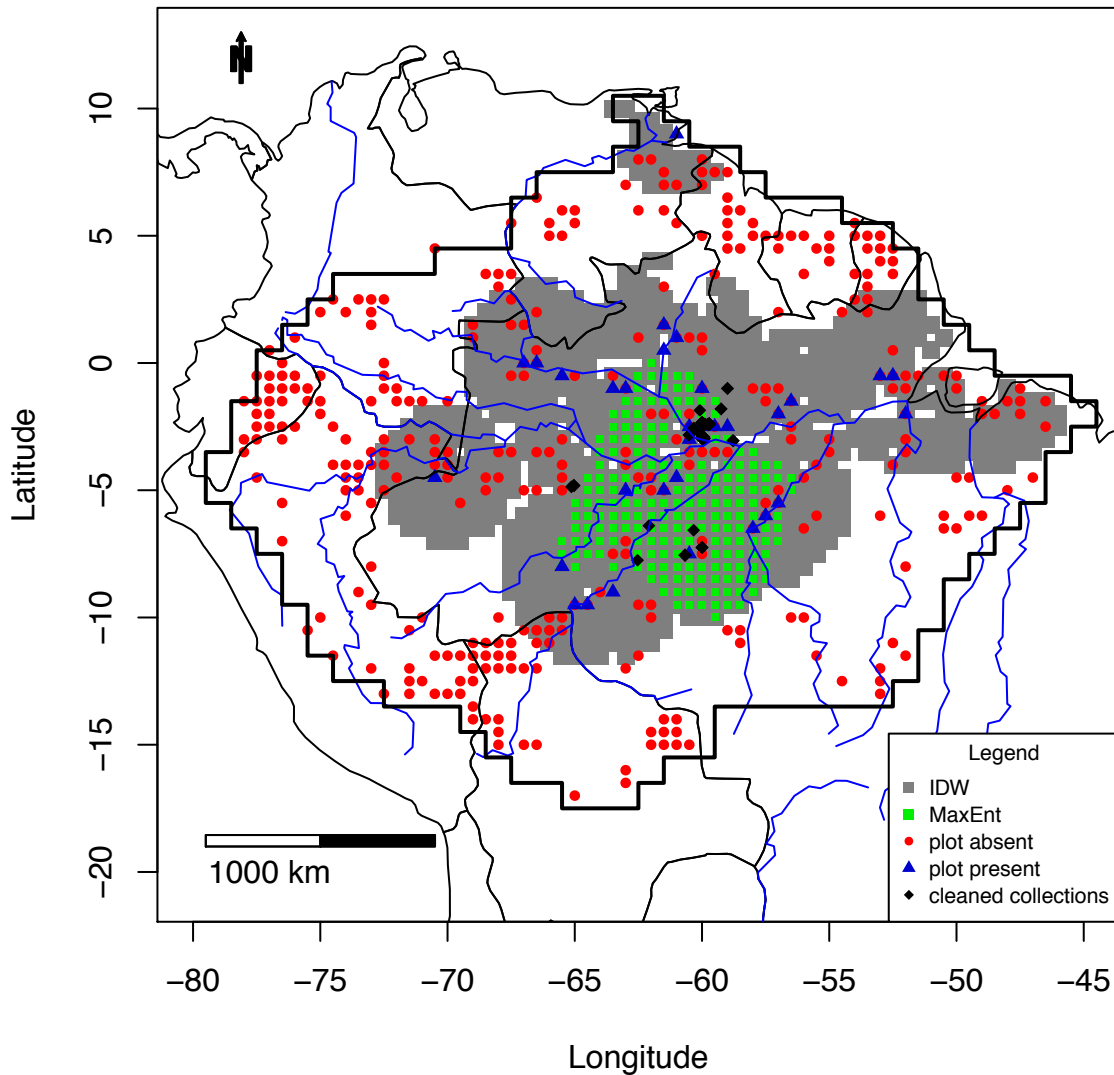

Figure S3\_47B MaxEnt map of *Eschweilera\_atropetiolata*

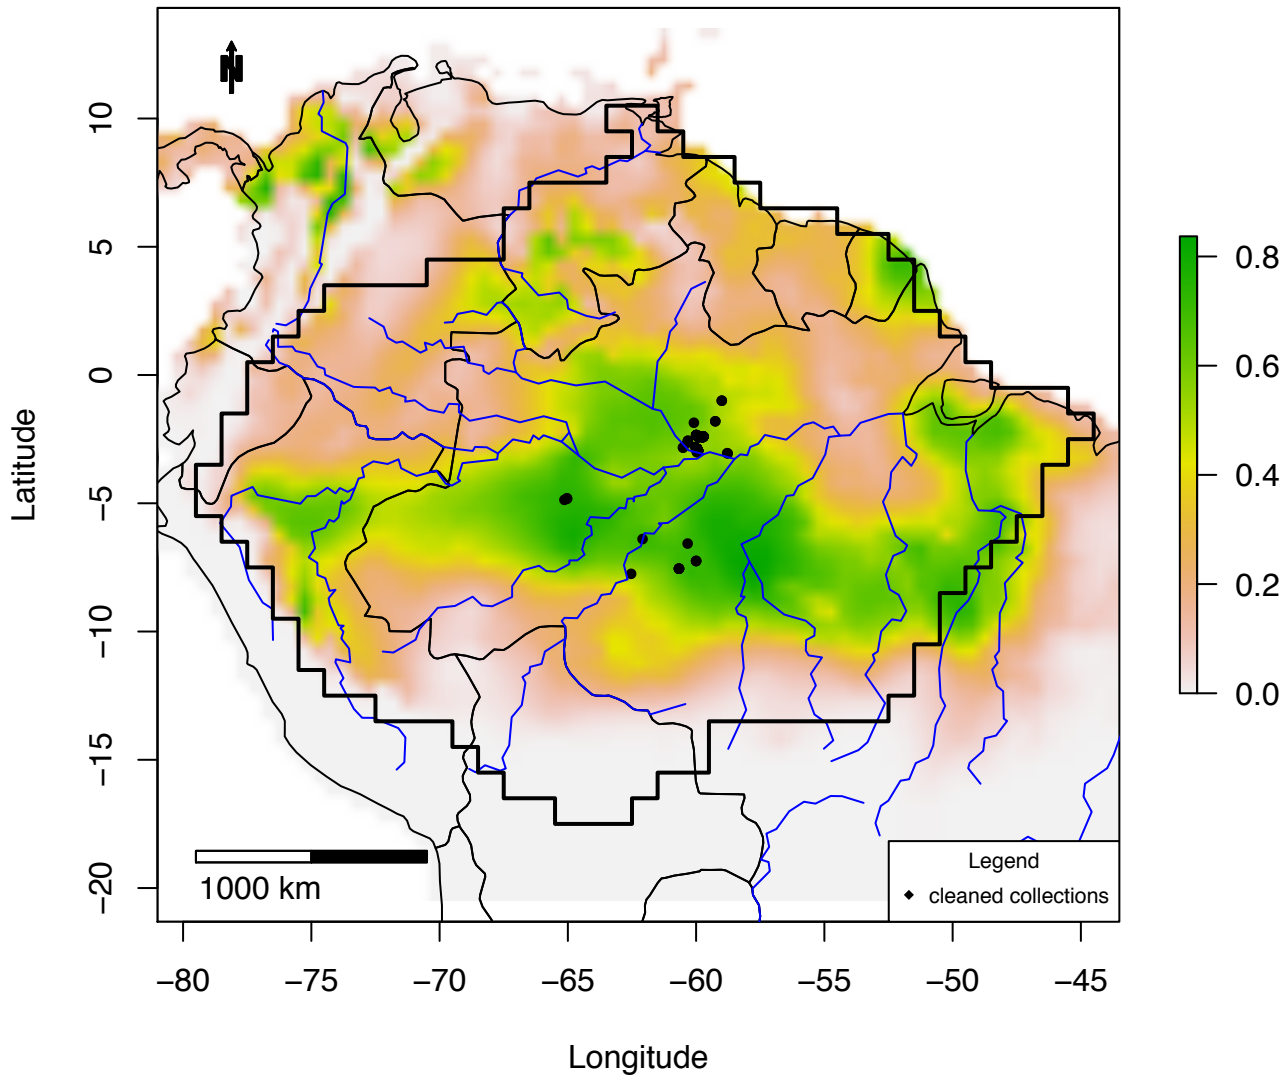

Figure S3\_47C IDW map of *Eschweilera atropetiolata*:  
plots = 0 – 0.3; IDW: 0 – 0.1

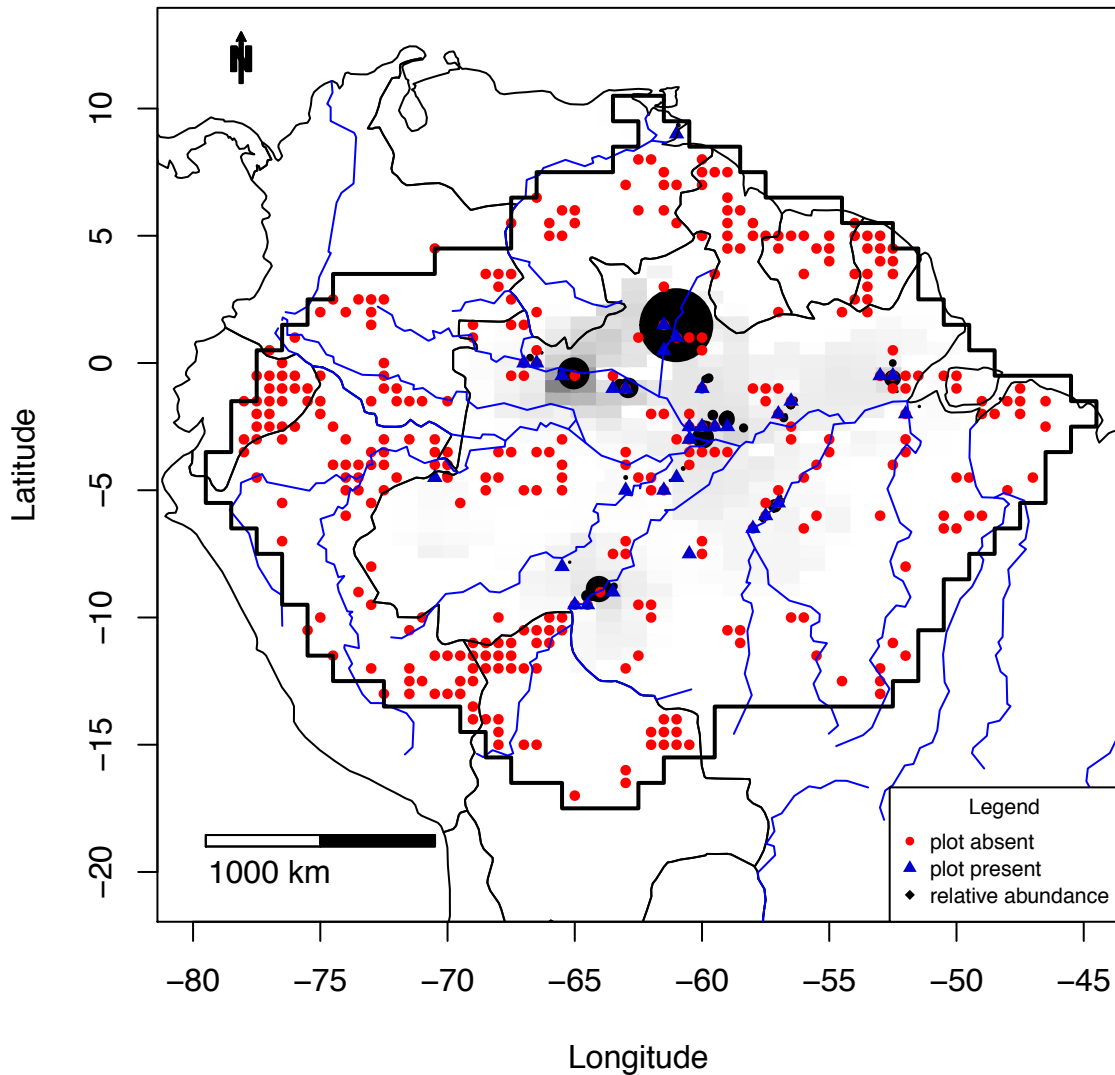

Figure S3\_48A Combined map of *Eschweilera bracteosa*

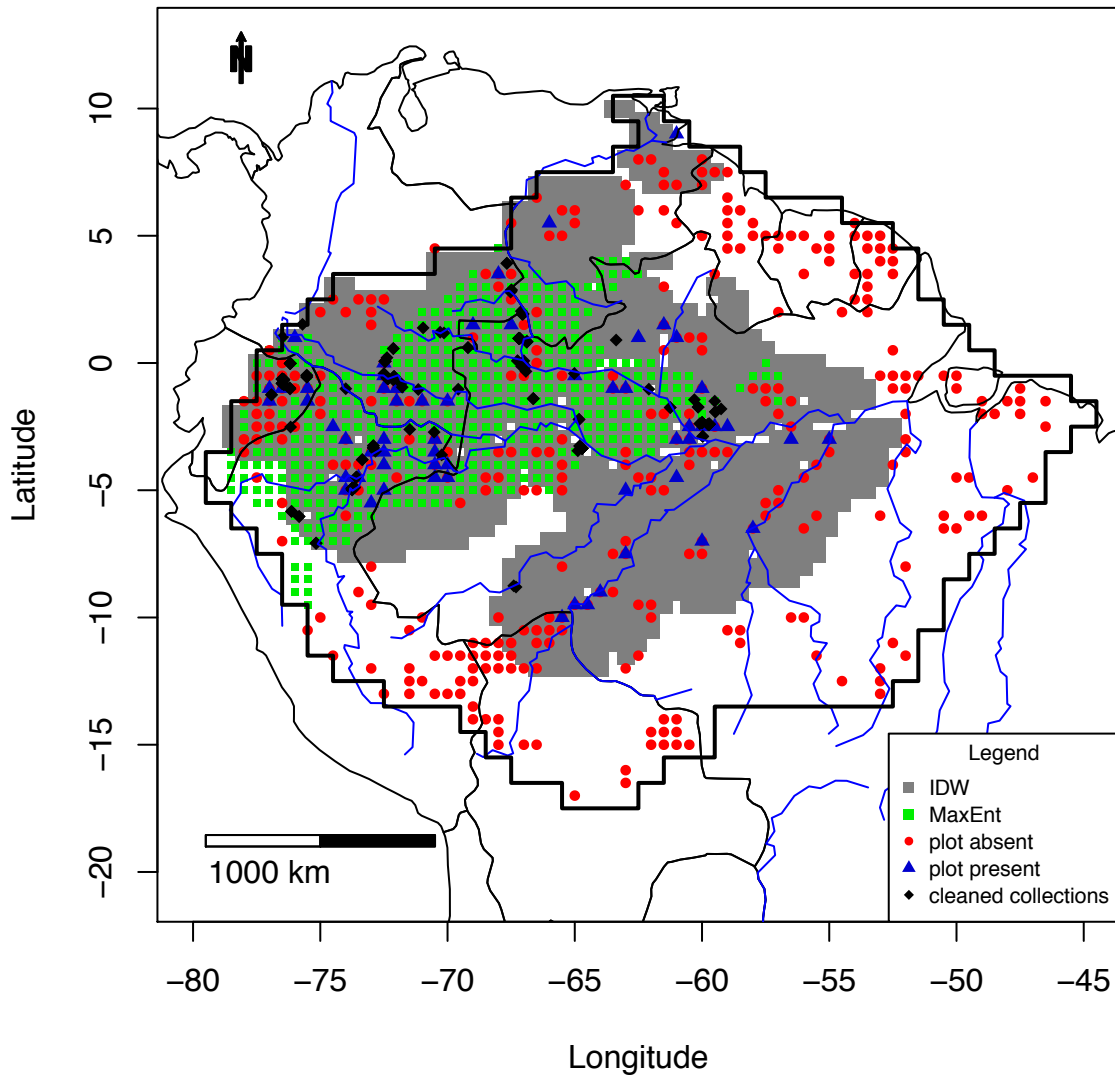

Figure S3\_48B MaxEnt map of *Eschweilera bracteosa*

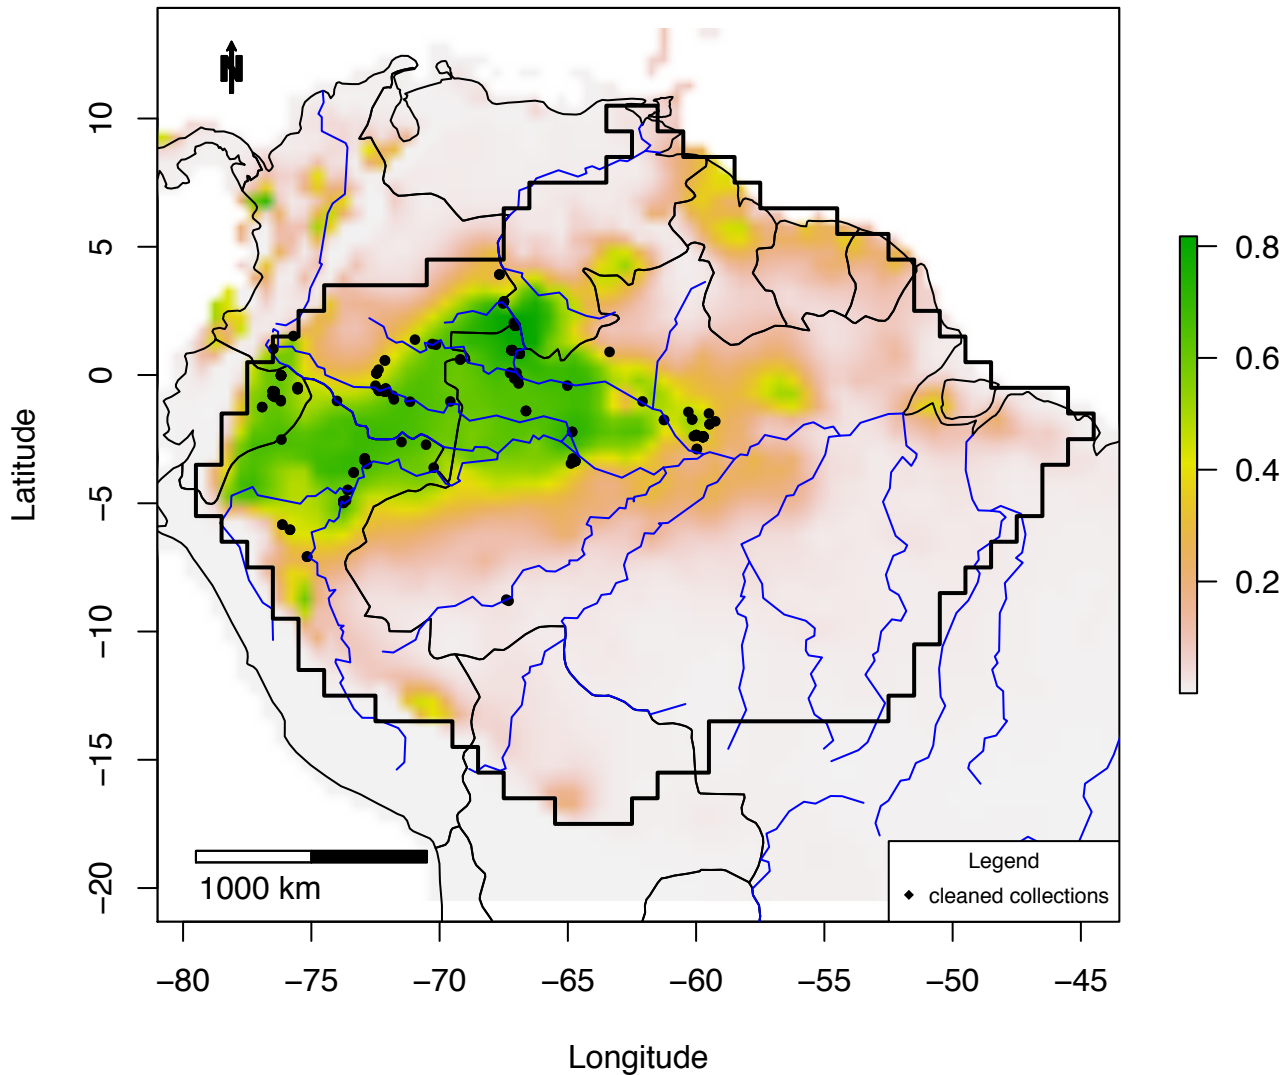



Figure S3\_48C IDW map of *Eschweilera bracteosa*:  
plots =0 – 0.15; IDW: 0 – 0.05

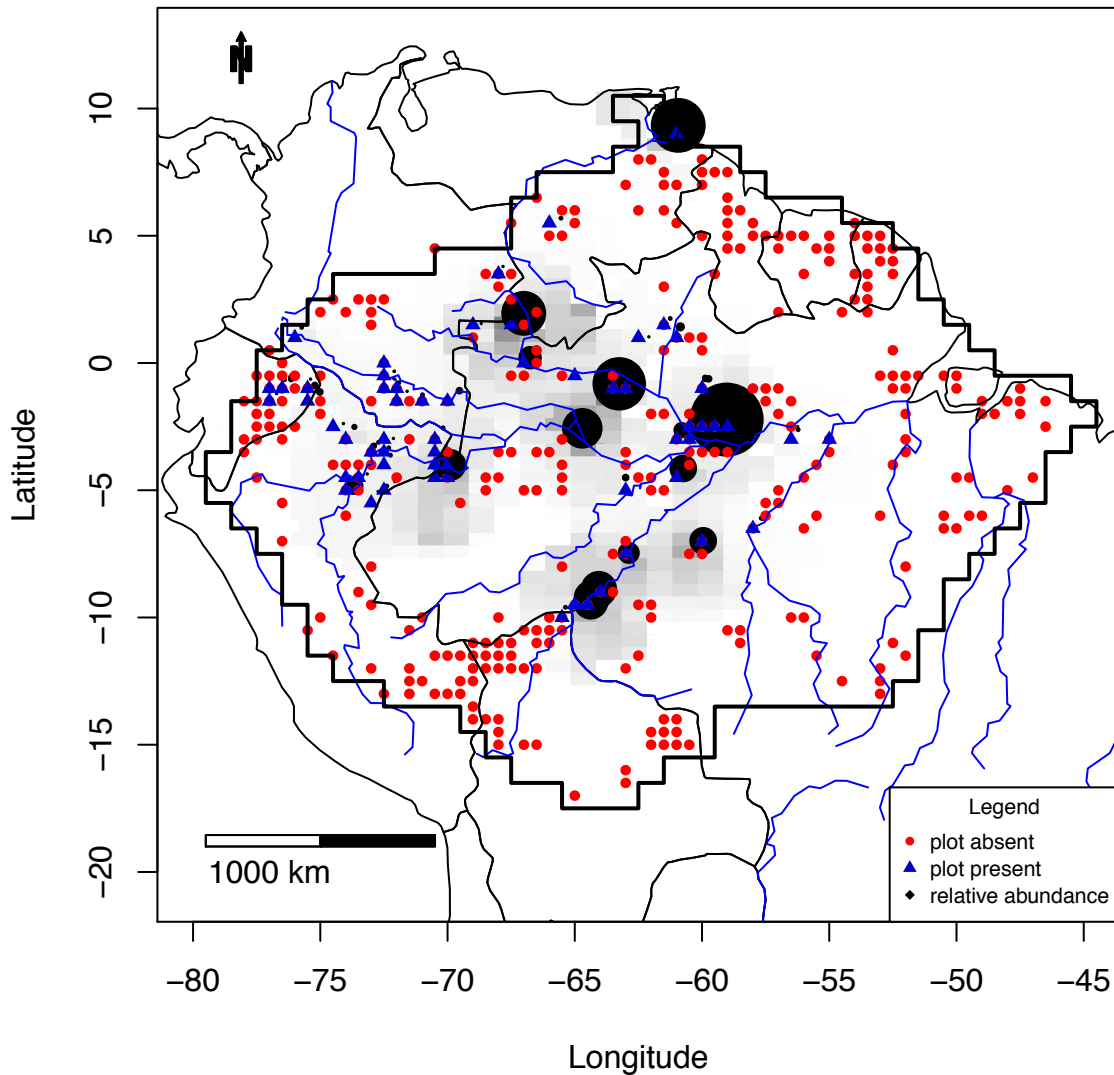

Figure S3\_49A Combined map of *Eschweilera\_coriacea*

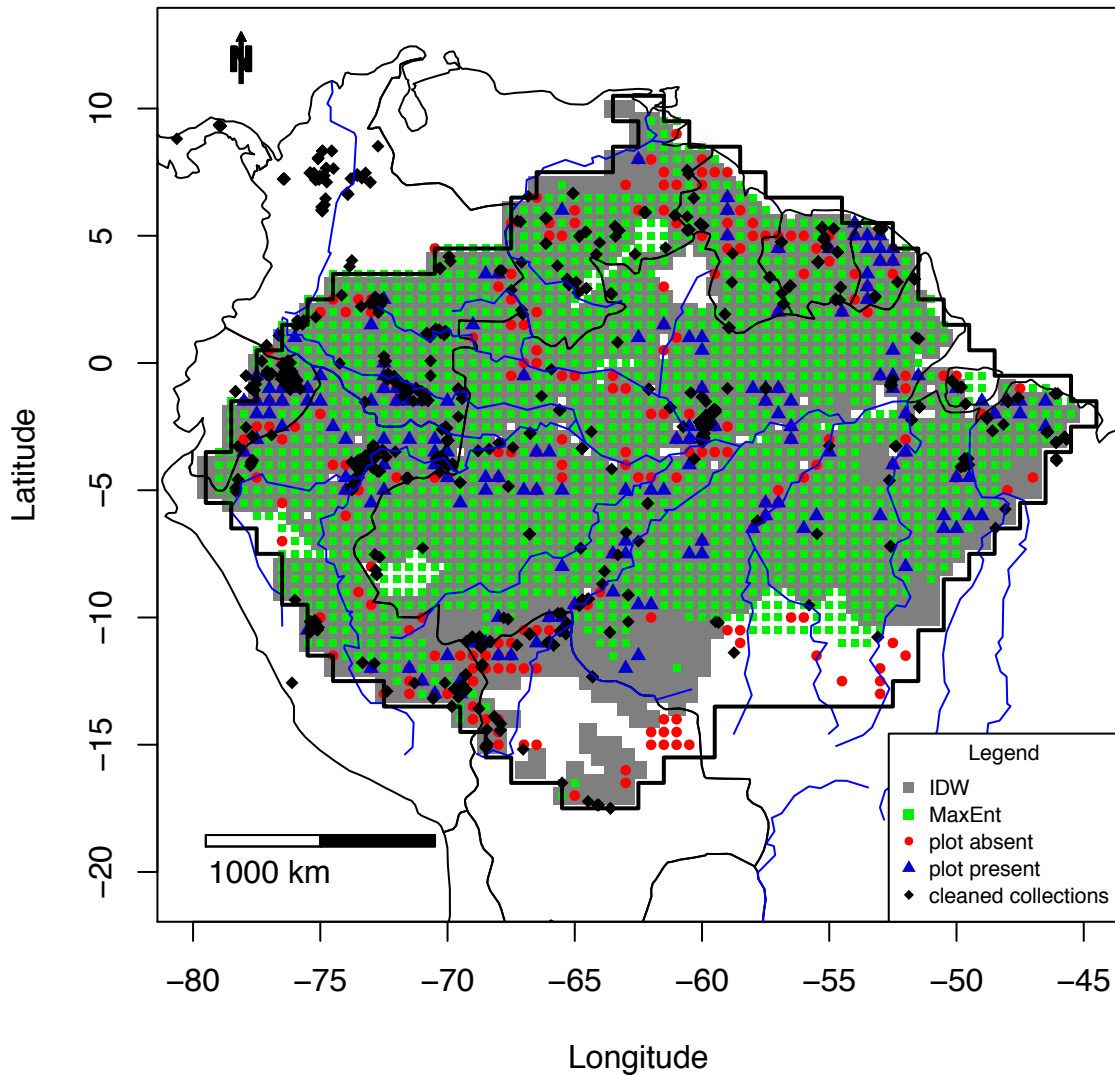

Figure S3\_49B MaxEnt map of *Eschweilera coriacea*

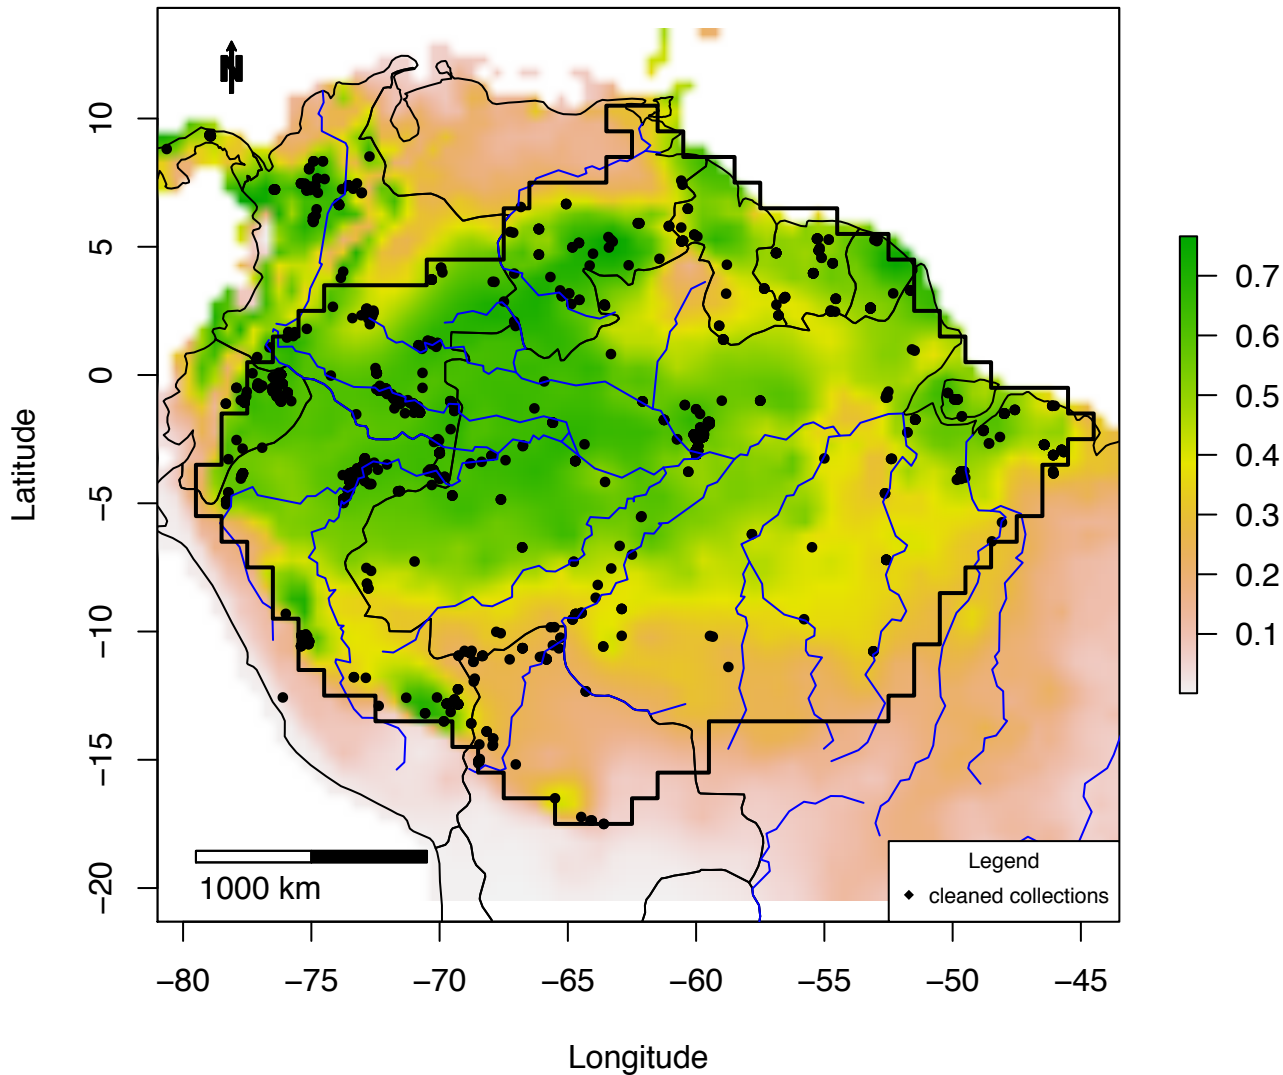

Figure S3\_49C IDW map of *Eschweilera coriacea*:  
plots =0 – 0.22; IDW: 0 – 0.13

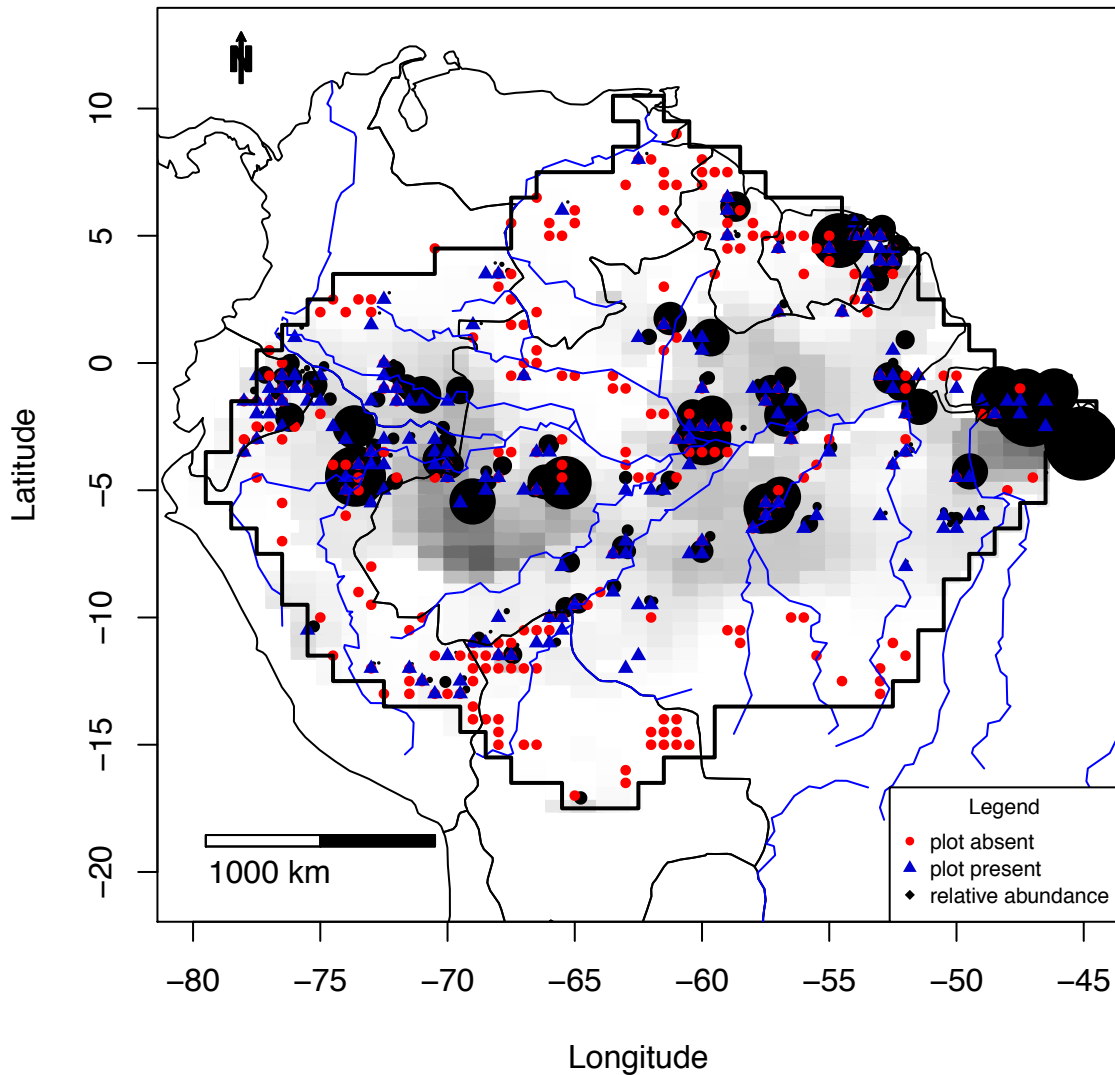

Figure S3\_50A Combined map of *Eschweilera decolorans*

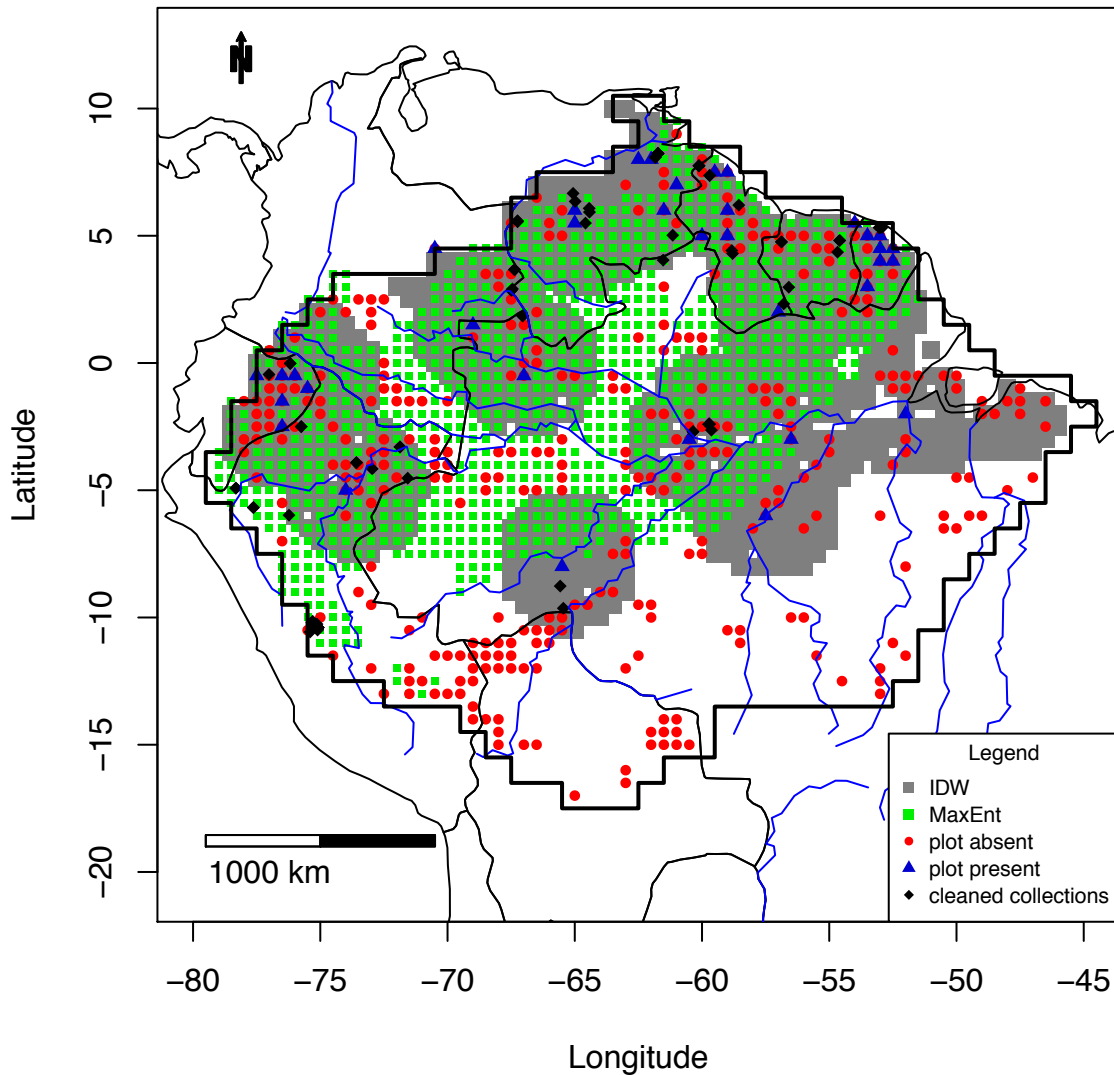

Figure S3\_50B MaxEnt map of *Eschweilera\_decolorans*

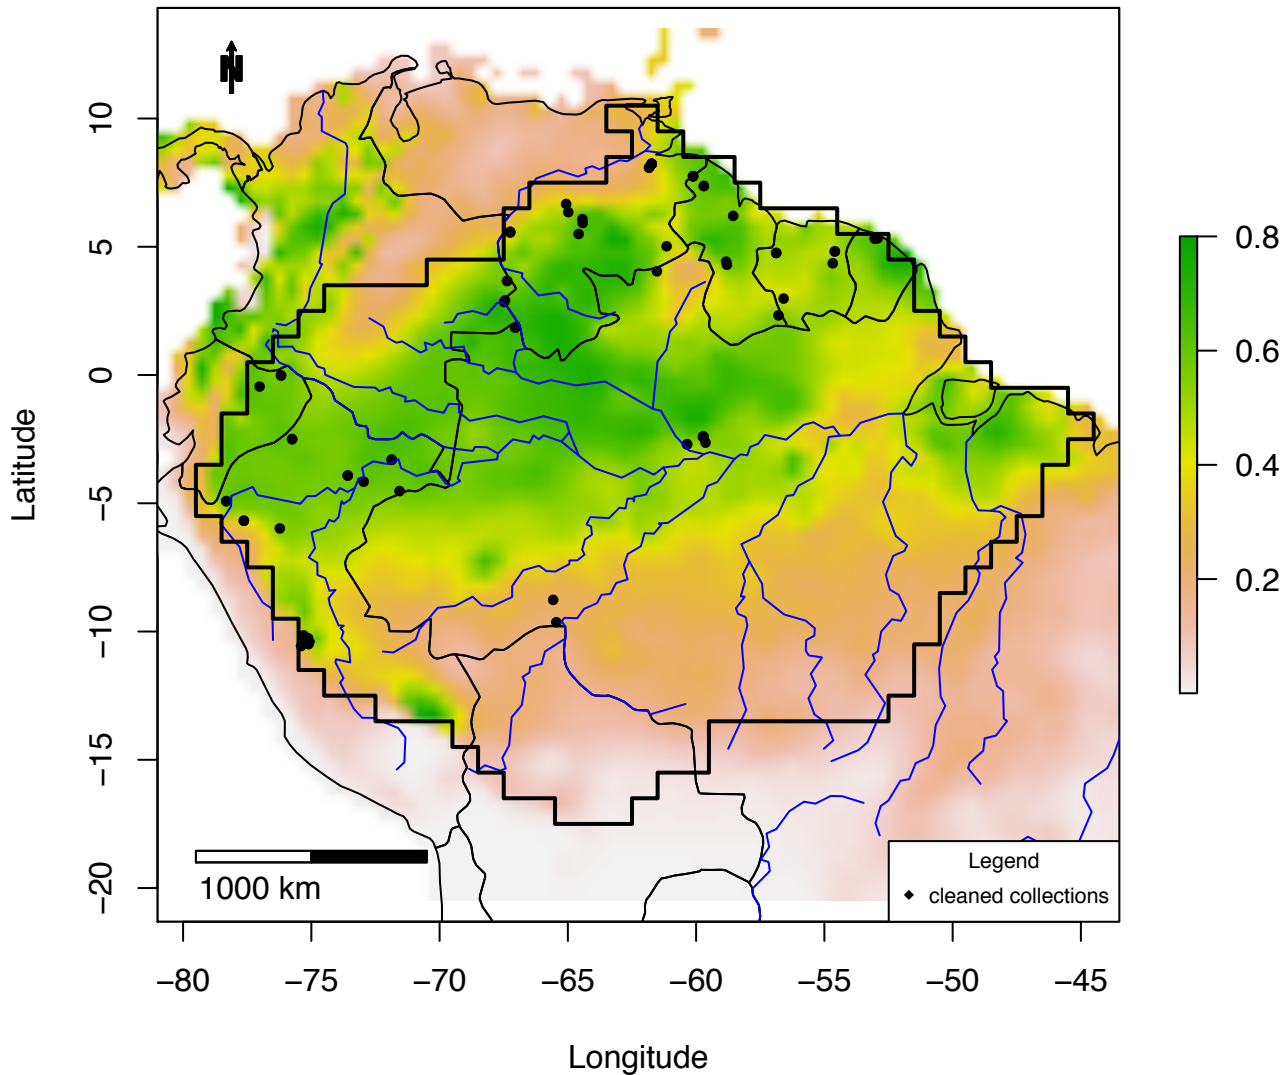

Figure S3\_50C IDW map of *Eschweilera decolorans*:  
plots =0 – 0.14; IDW: 0 – 0.04

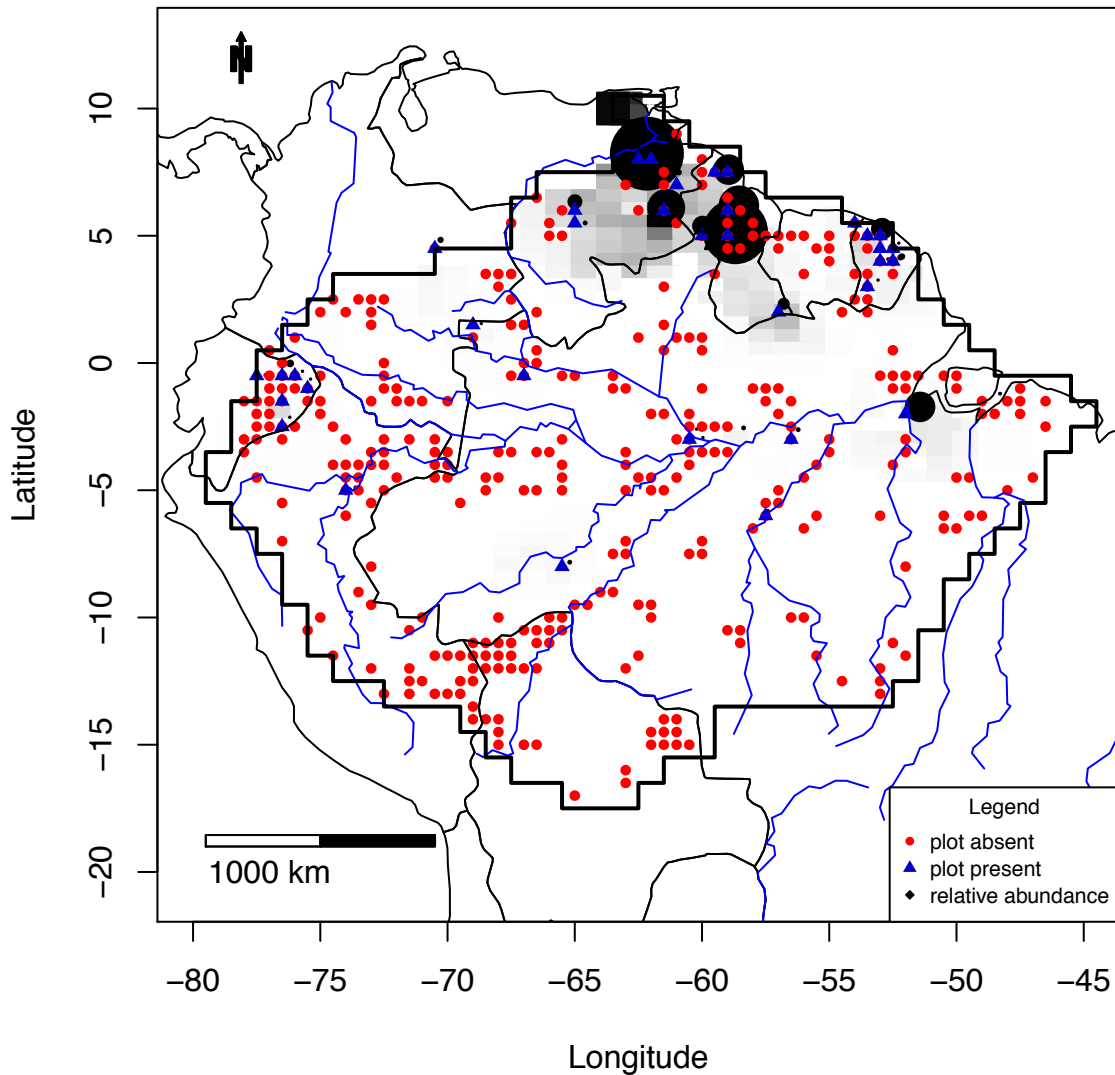

Figure S3\_51A Combined map of *Eschweilera grandiflora*

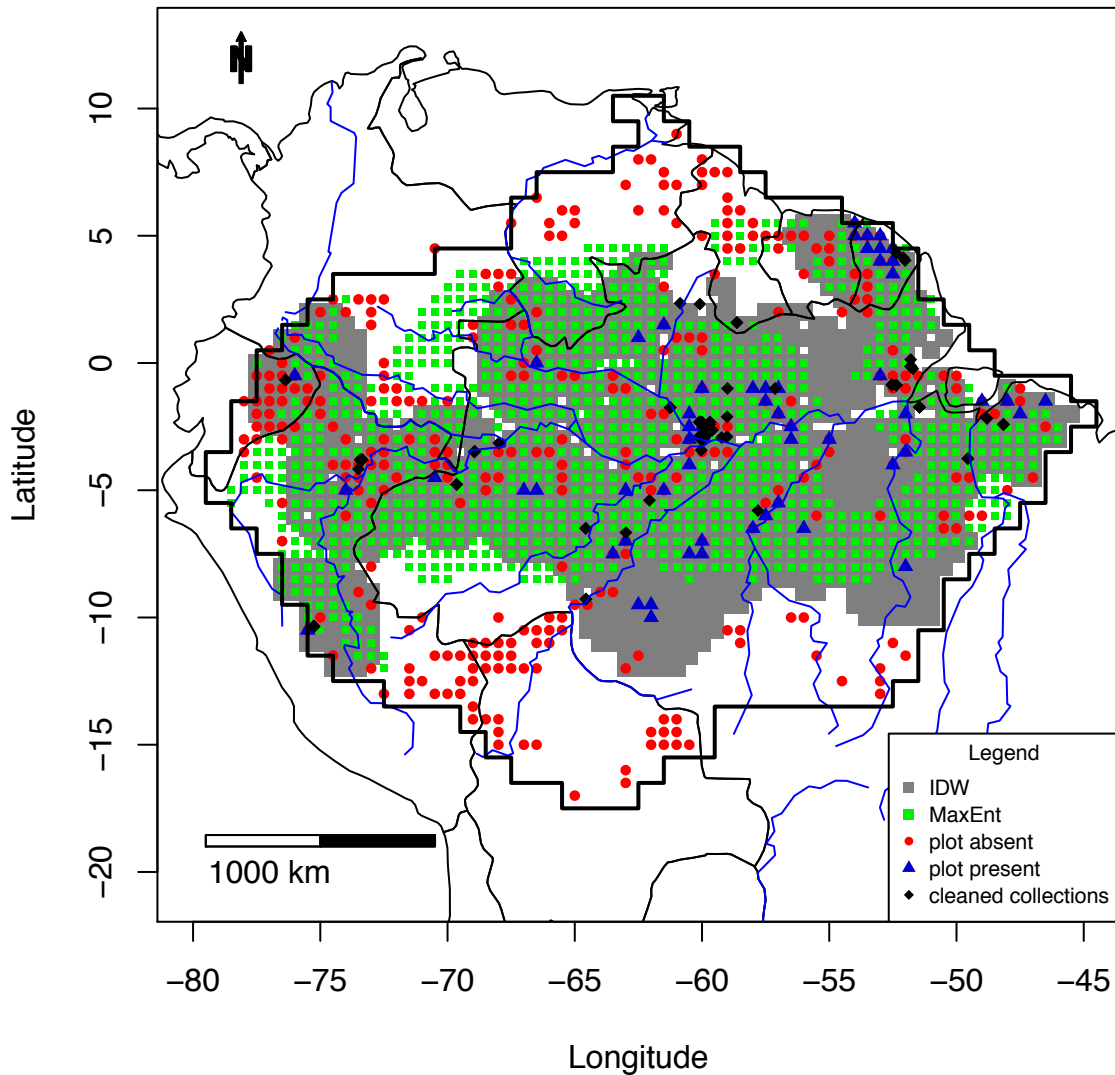





Figure S3\_51C IDW map of *Eschweilera grandiflora*:  
plots =0 – 0.12; IDW: 0 – 0.1

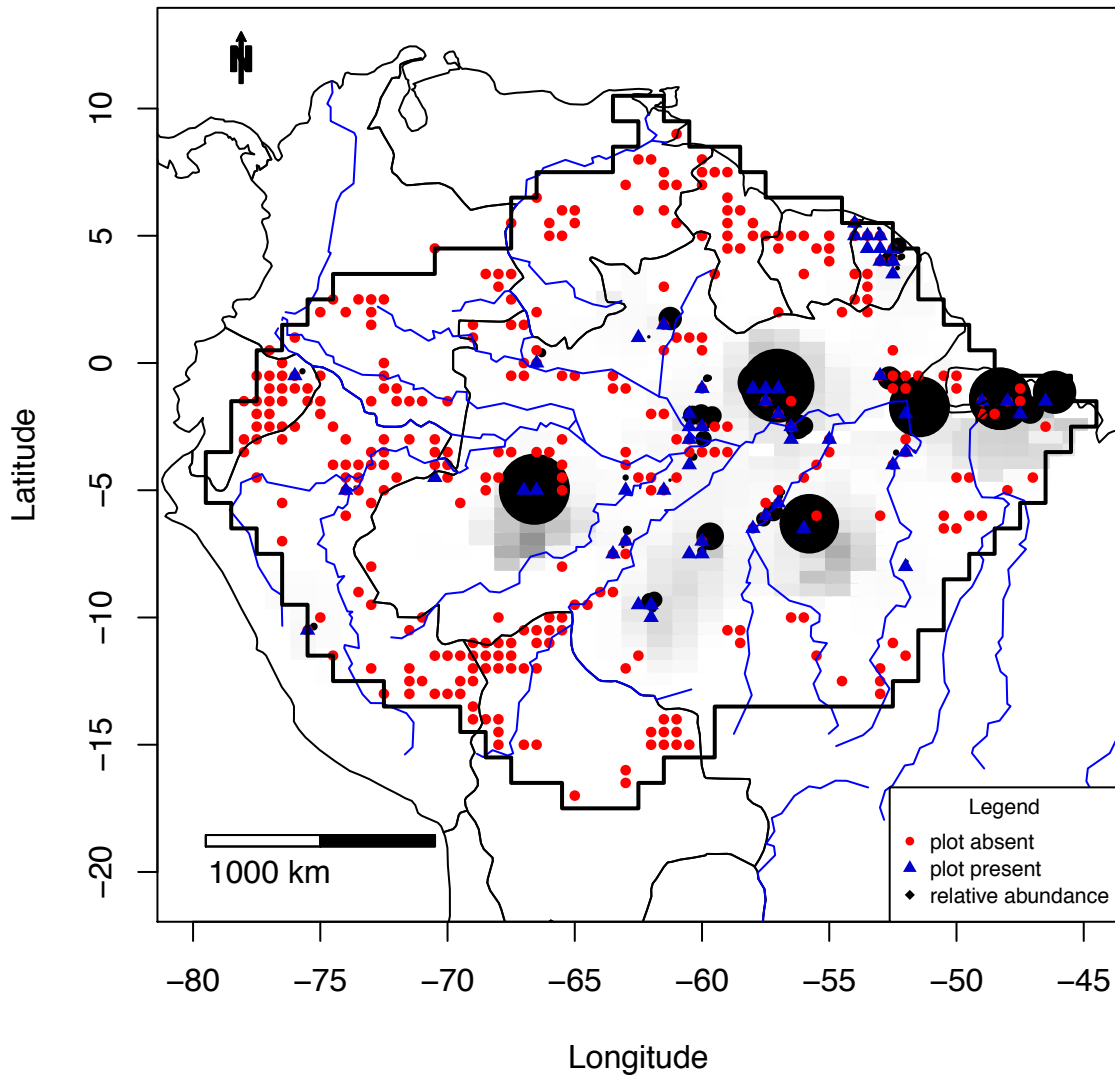

Figure S3\_52A Combined map of *Eschweilera parviflora*

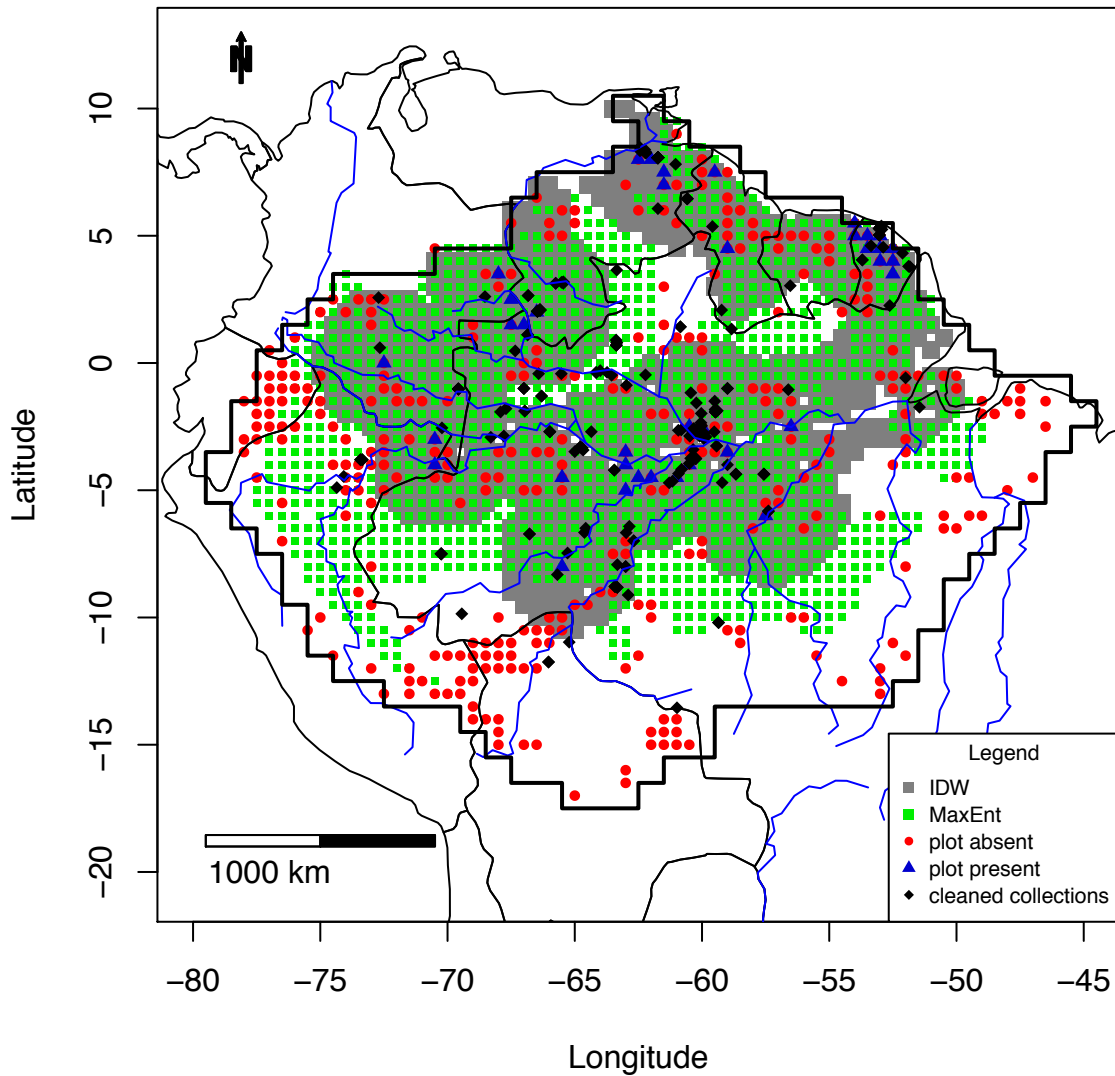

Figure S3\_52B MaxEnt map of *Eschweilera*\_parviflora

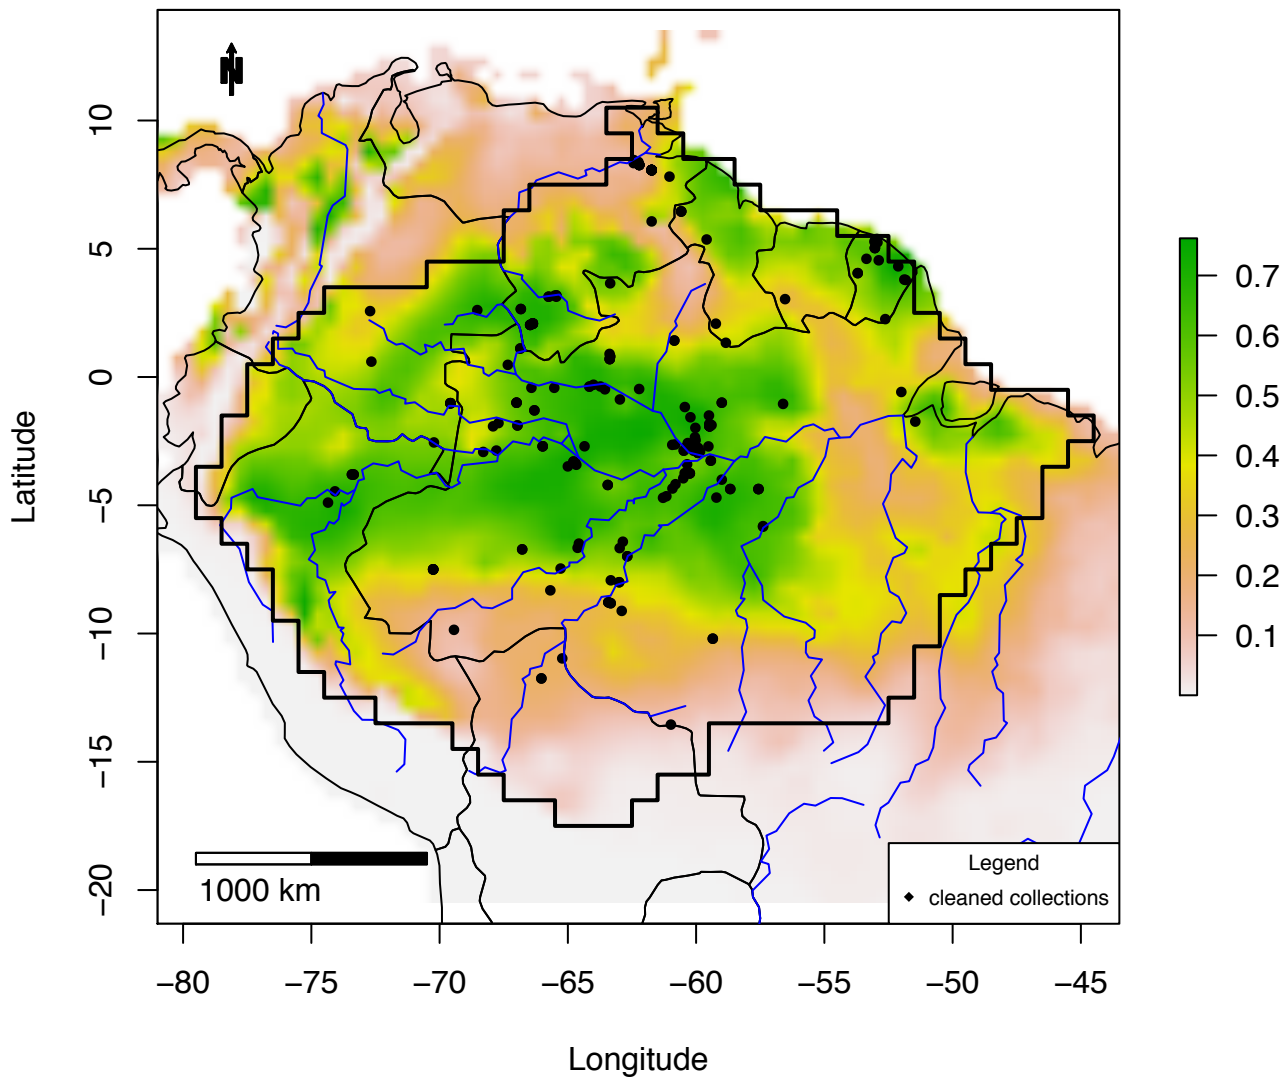

Figure S3\_52C IDW map of *Eschweilera parviflora*:  
plots =0 – 0.16; IDW: 0 – 0.09

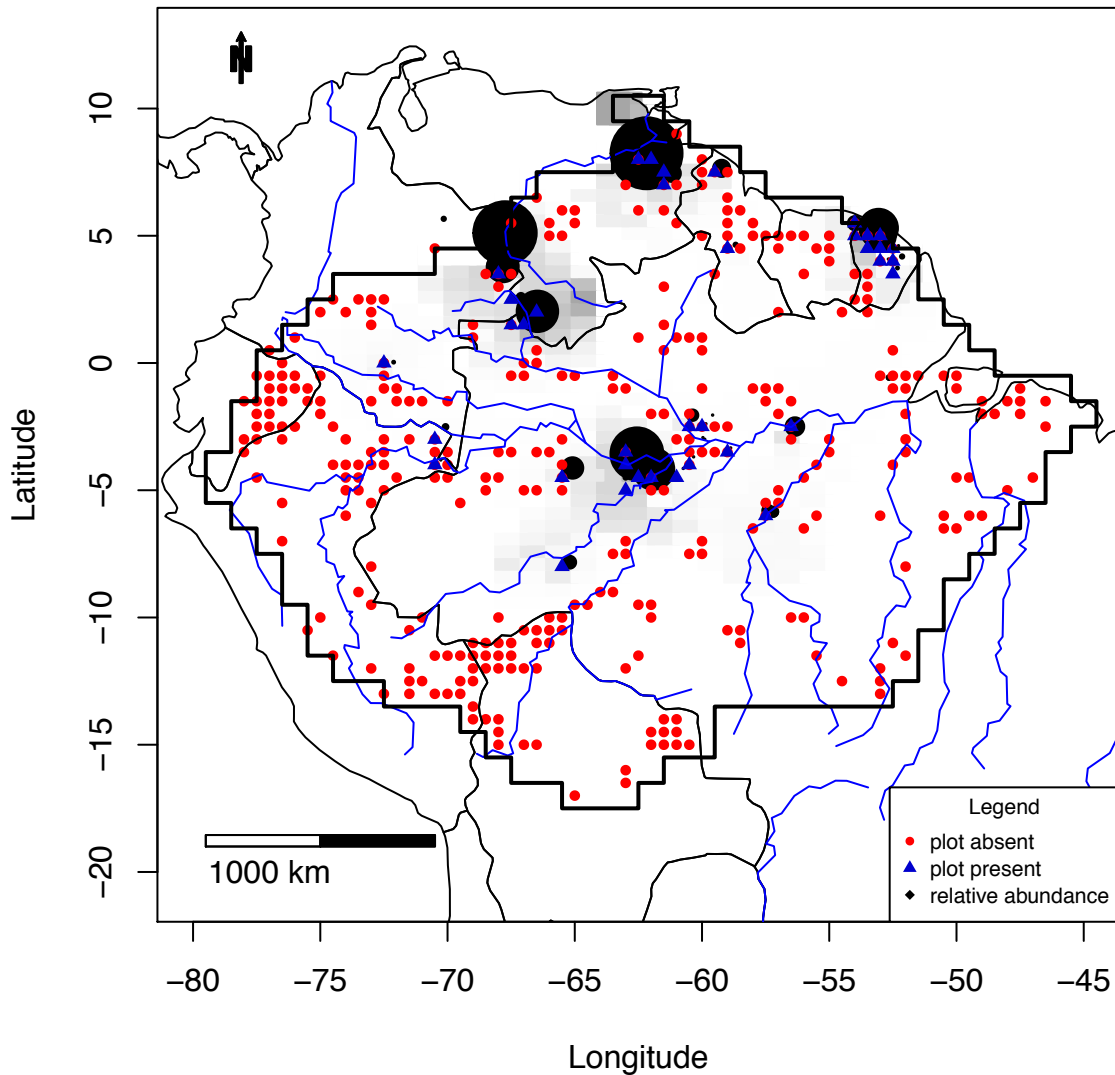

Figure S3\_53A Combined map of *Eschweilera parvifolia*

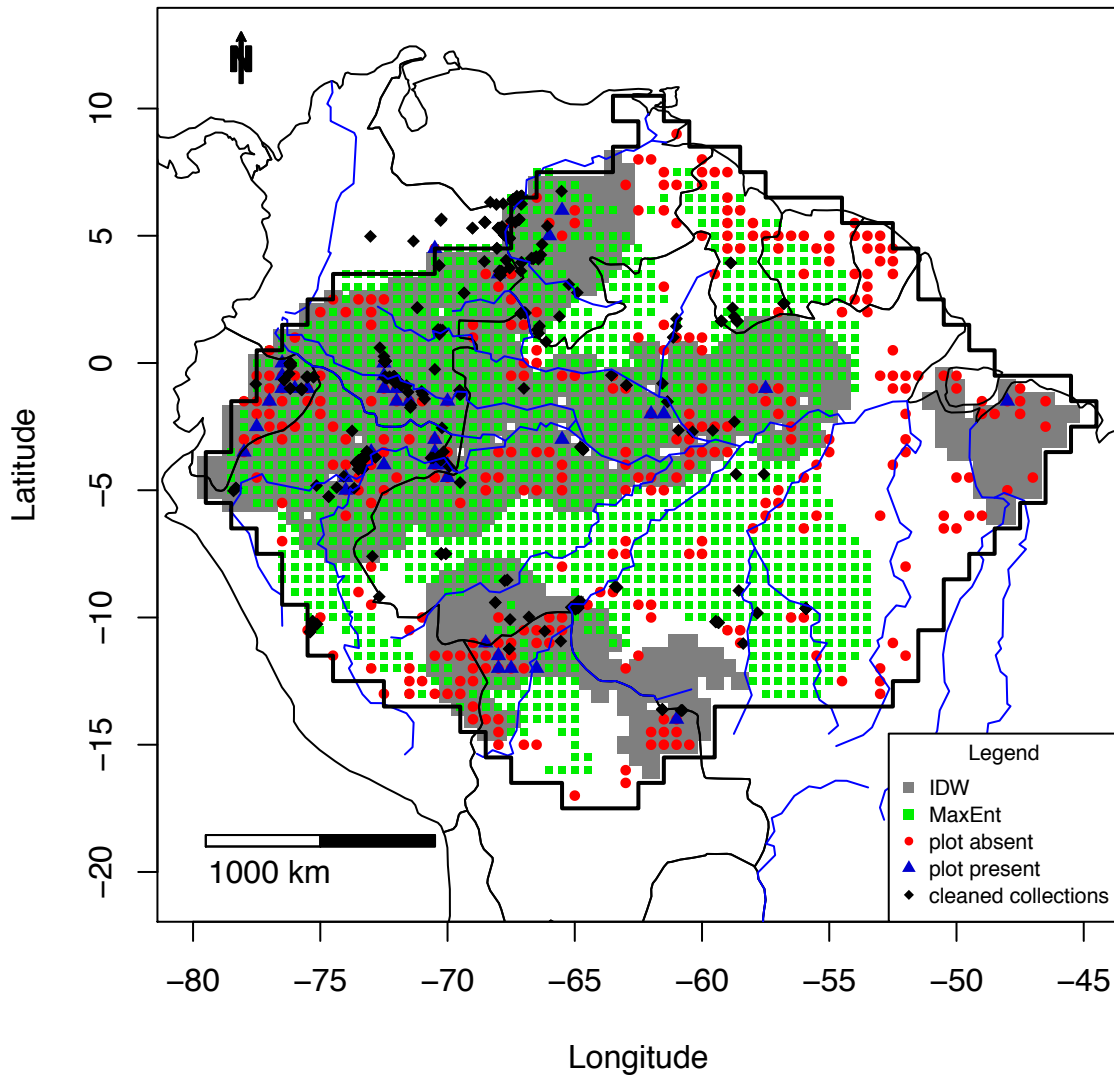

Figure S3\_53B MaxEnt map of *Eschweilera*\_parvifolia

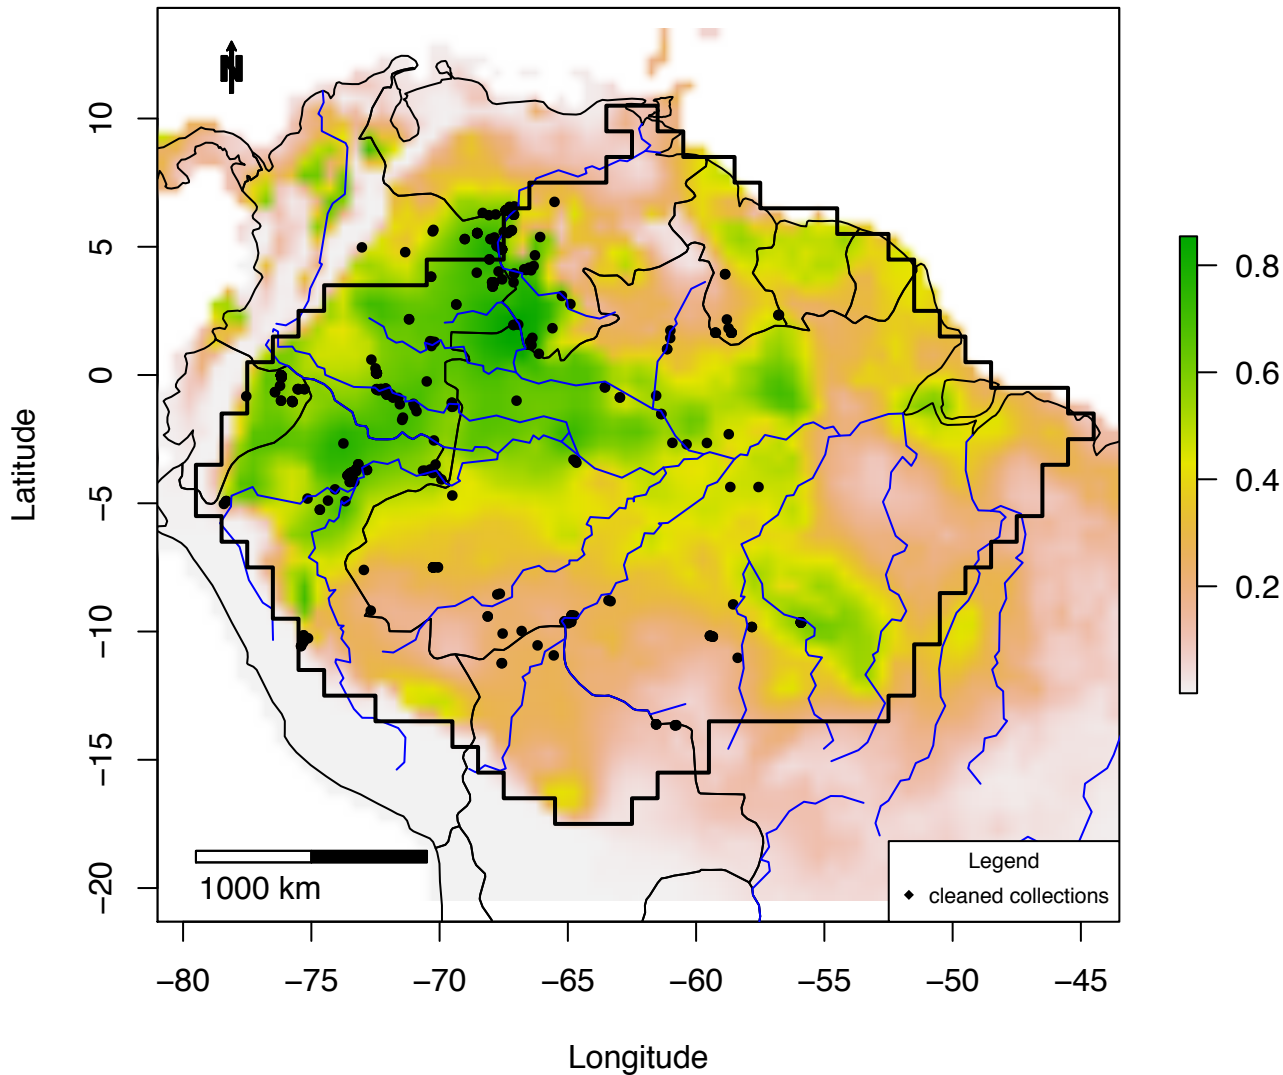

Figure S3\_53C IDW map of *Eschweilera parvifolia*:  
plots = 0 – 0.16; IDW: 0 – 0.02

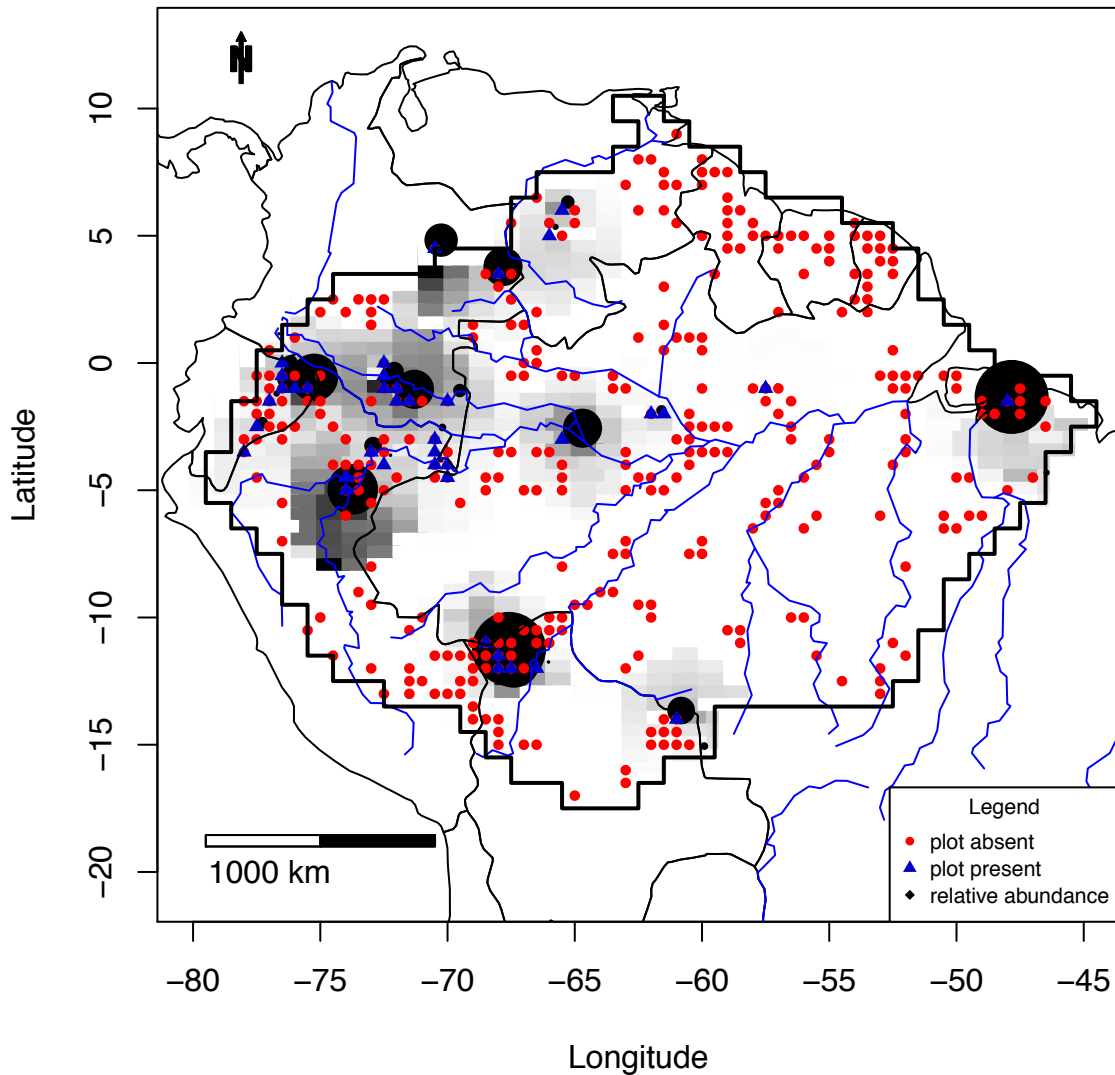



Figure S3\_54A Combined map of *Eschweilera\_pedicellata*

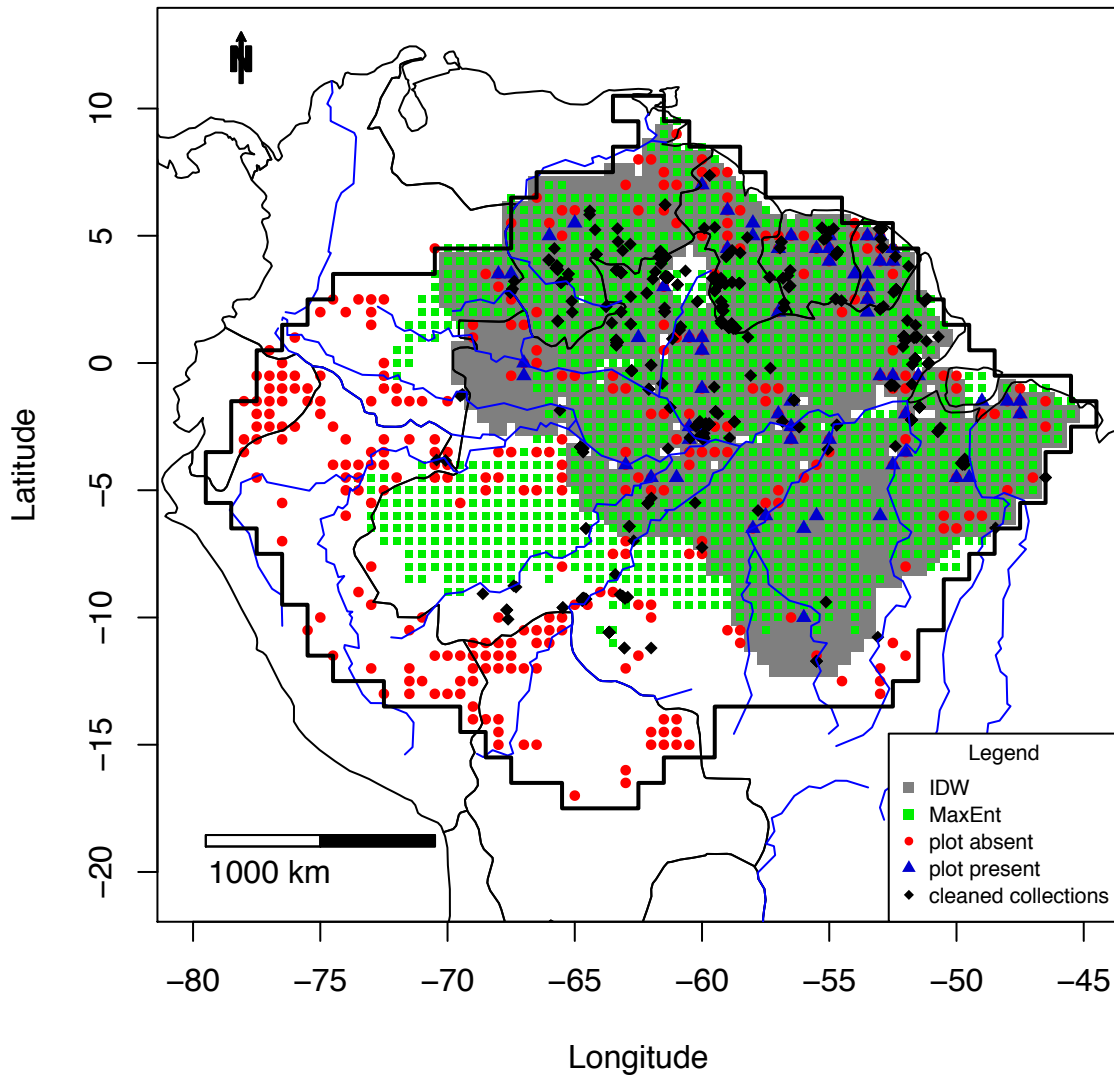

Figure S3\_54B MaxEnt map of *Eschweilera\_pedicellata*

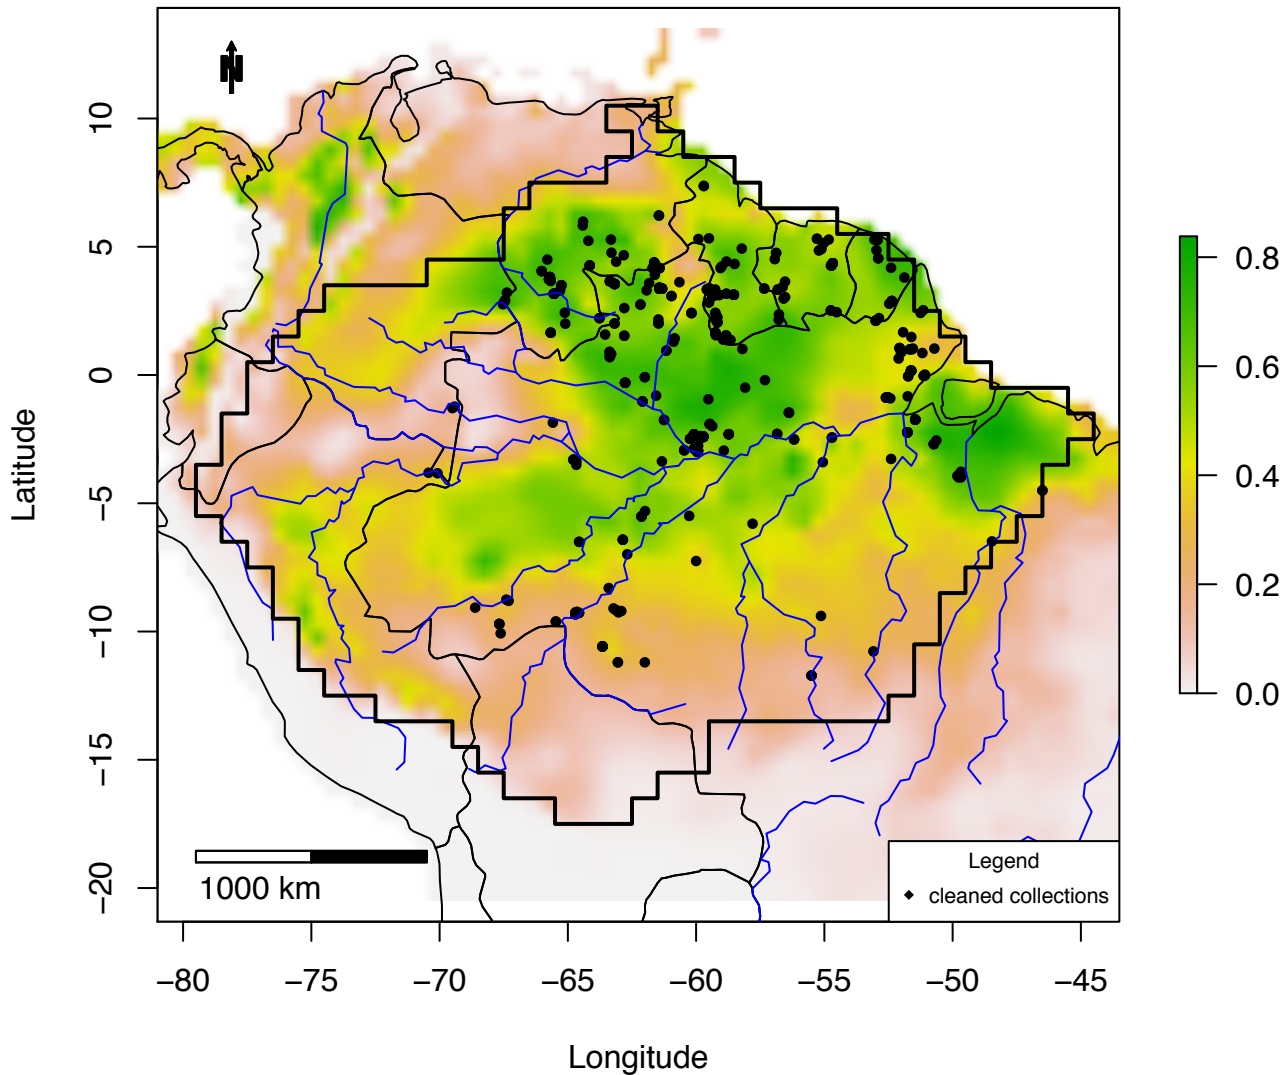

Figure S3\_54C IDW map of *Eschweilera pedicellata*:  
plots =0 – 0.3; IDW: 0 – 0.27

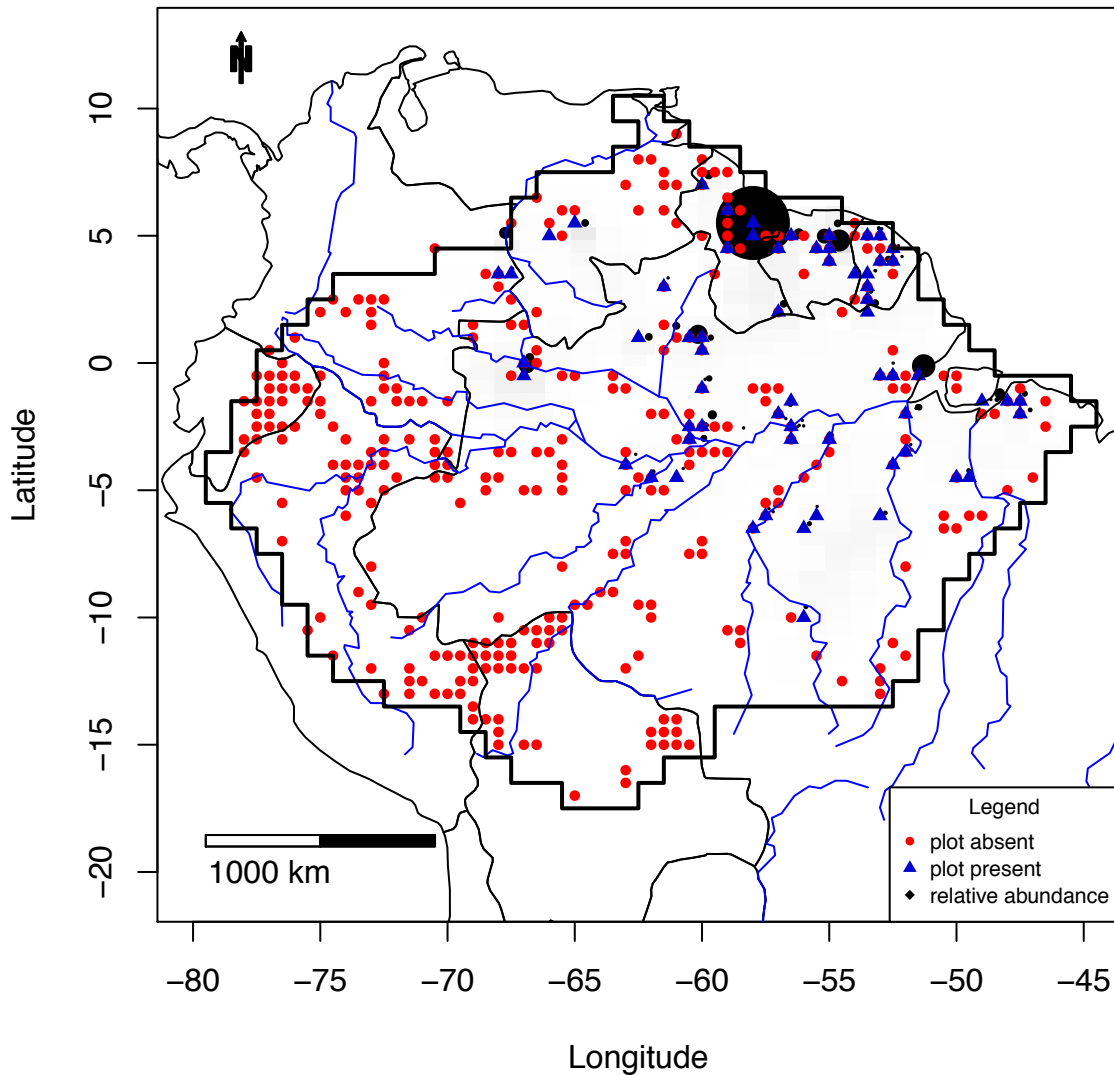

Figure S3\_55A Combined map of *Eschweilera sagotiana*

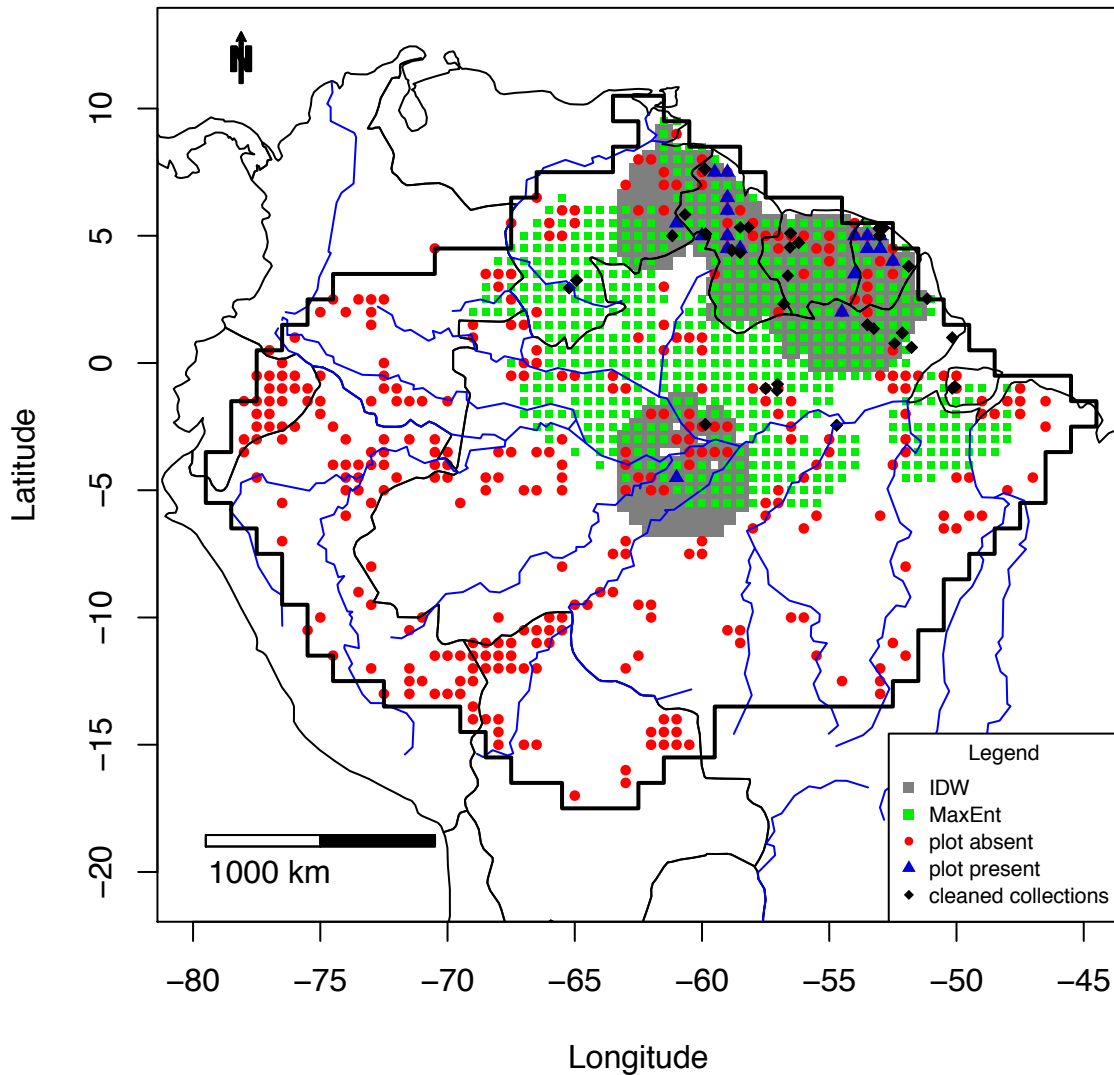

Figure S3\_55B MaxEnt map of *Eschweilera sagotiana*

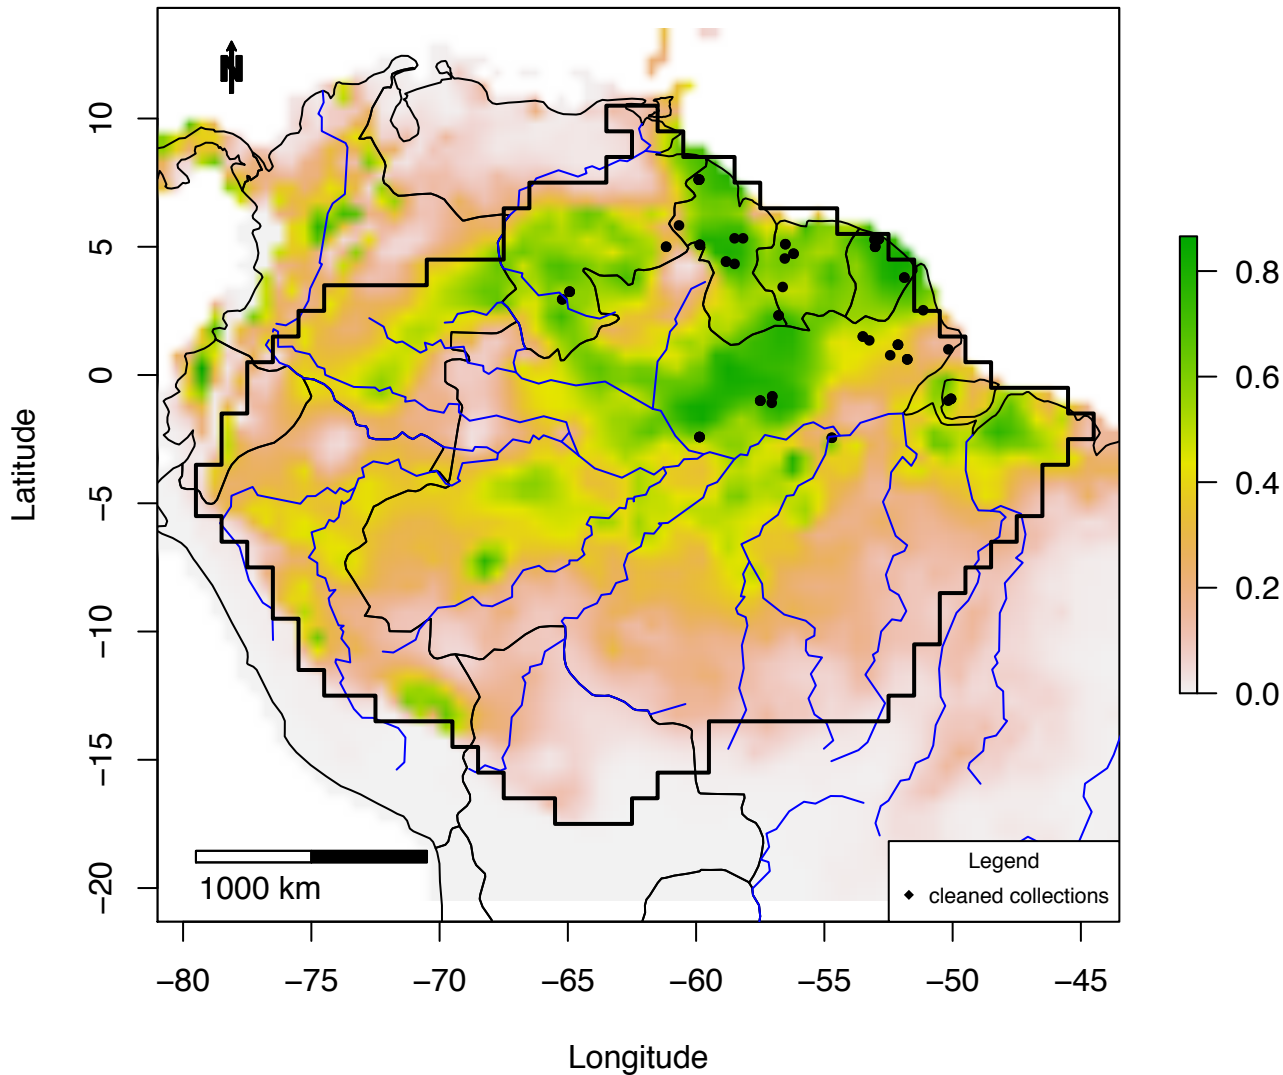

**Figure S3\_55C IDW map of *Eschweilera sagotiana*:**  
plots =0 – 0.32; IDW: 0 – 0.11

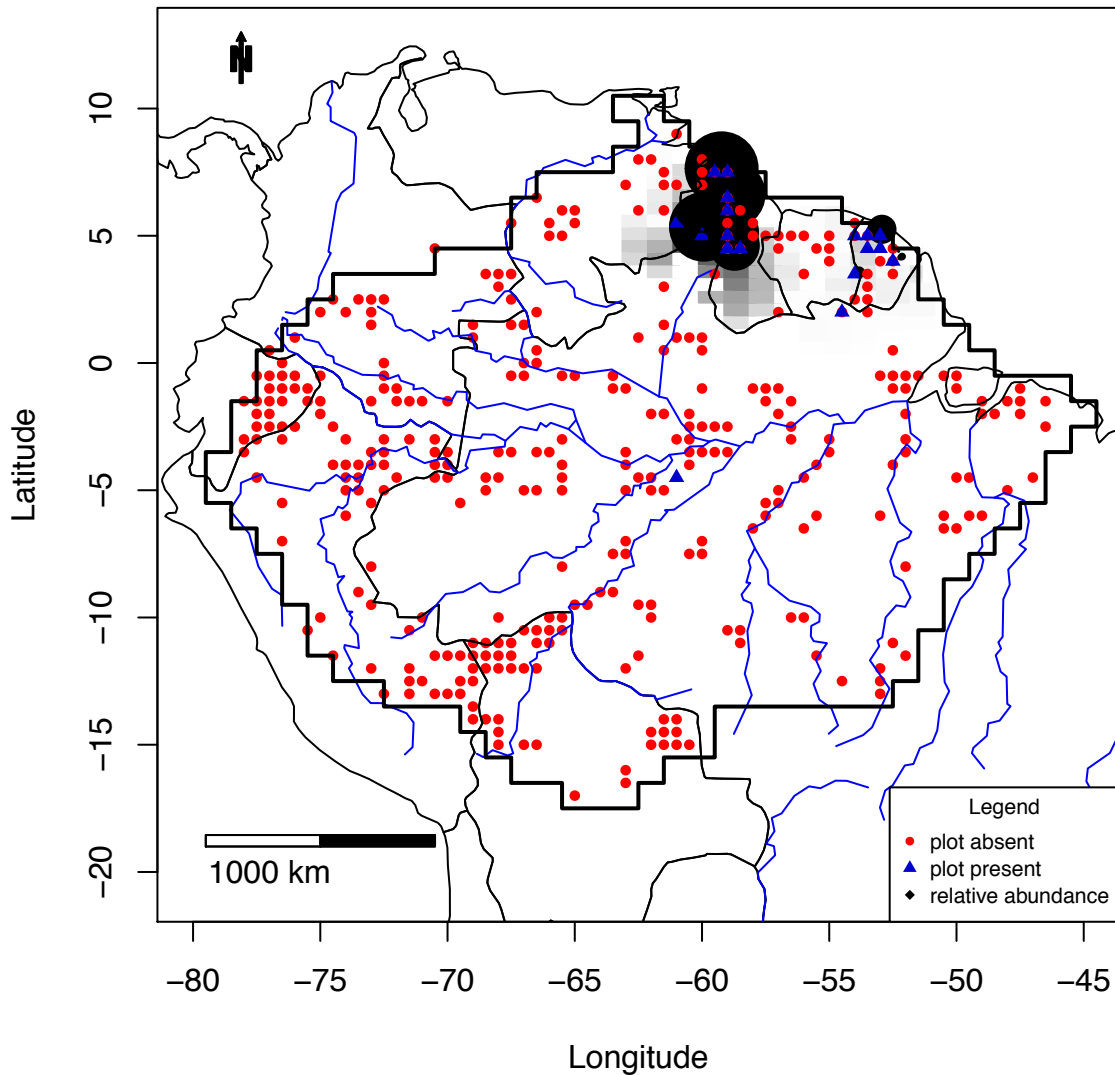

Figure S3\_56A Combined map of *Eschweilera\_tessmannii*

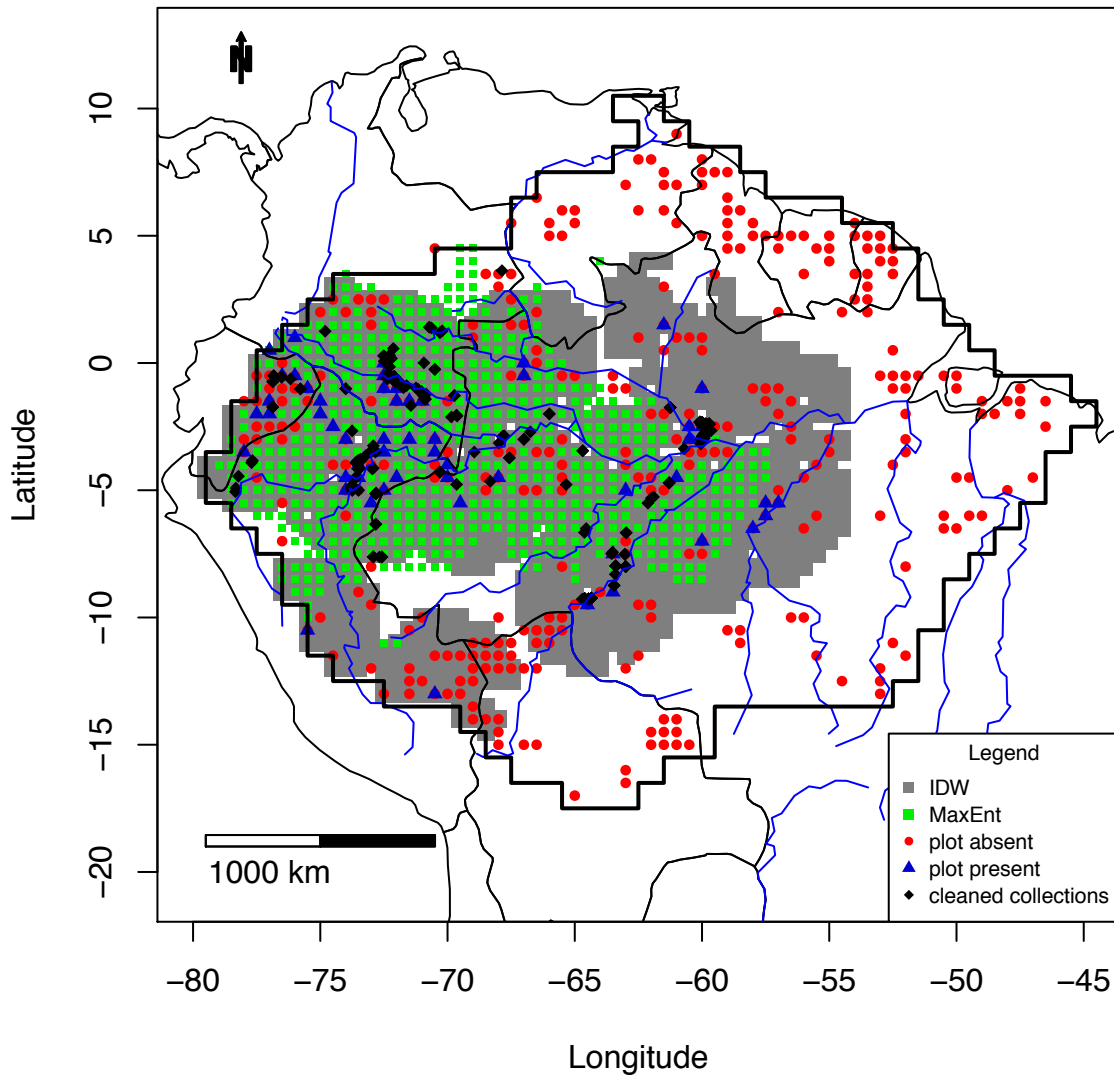

Figure S3\_56B MaxEnt map of *Eschweilera\_tessmannii*

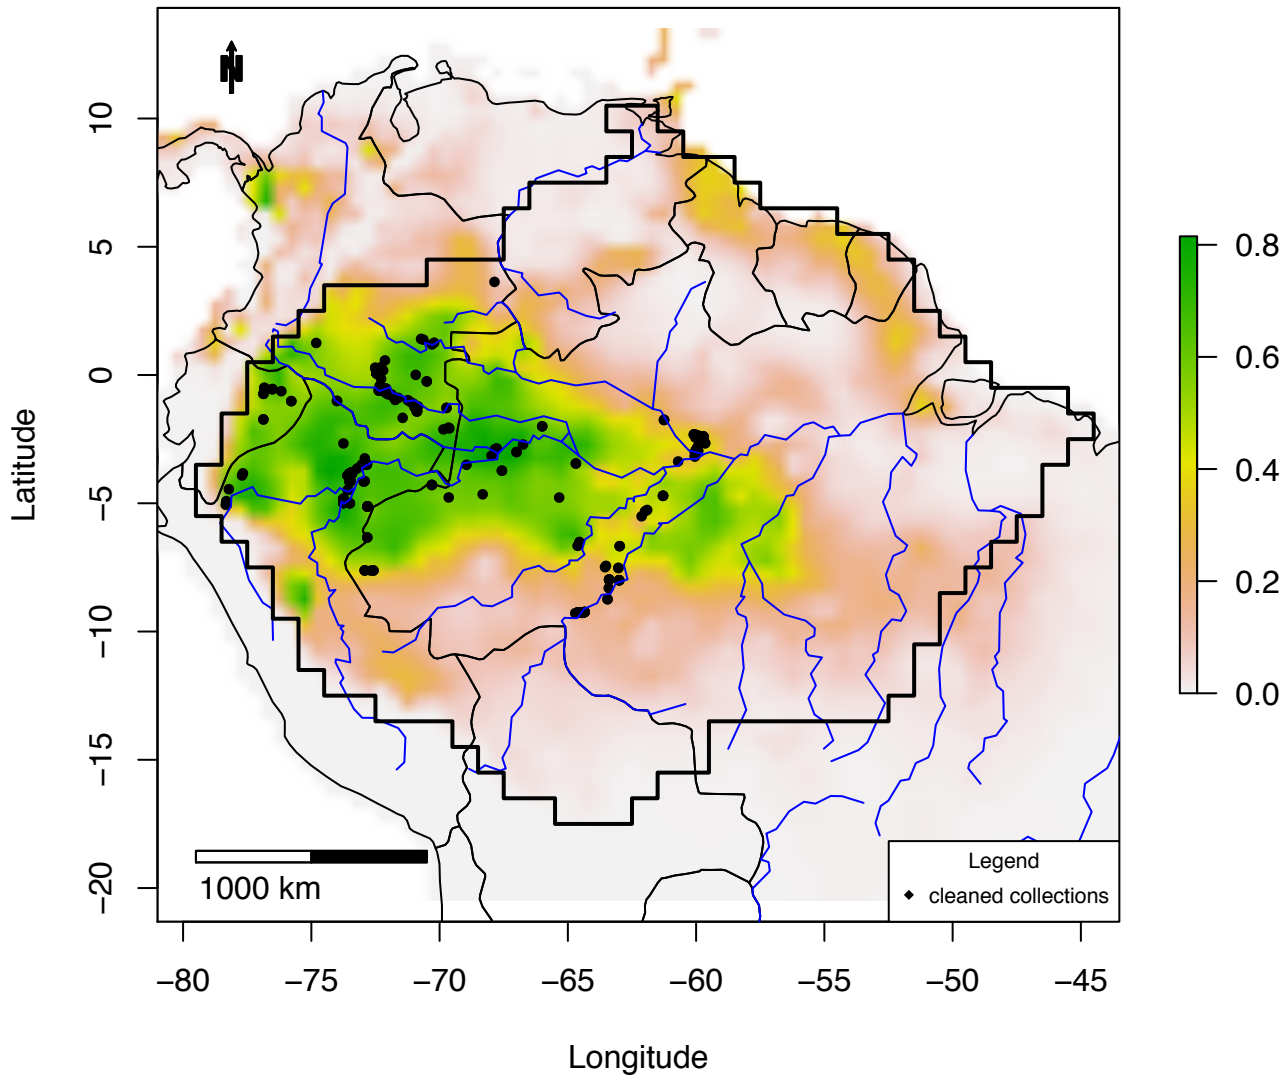



Figure S3\_56C IDW map of *Eschweilera tessmannii*:  
plots =0 – 0.25; IDW: 0 – 0.04

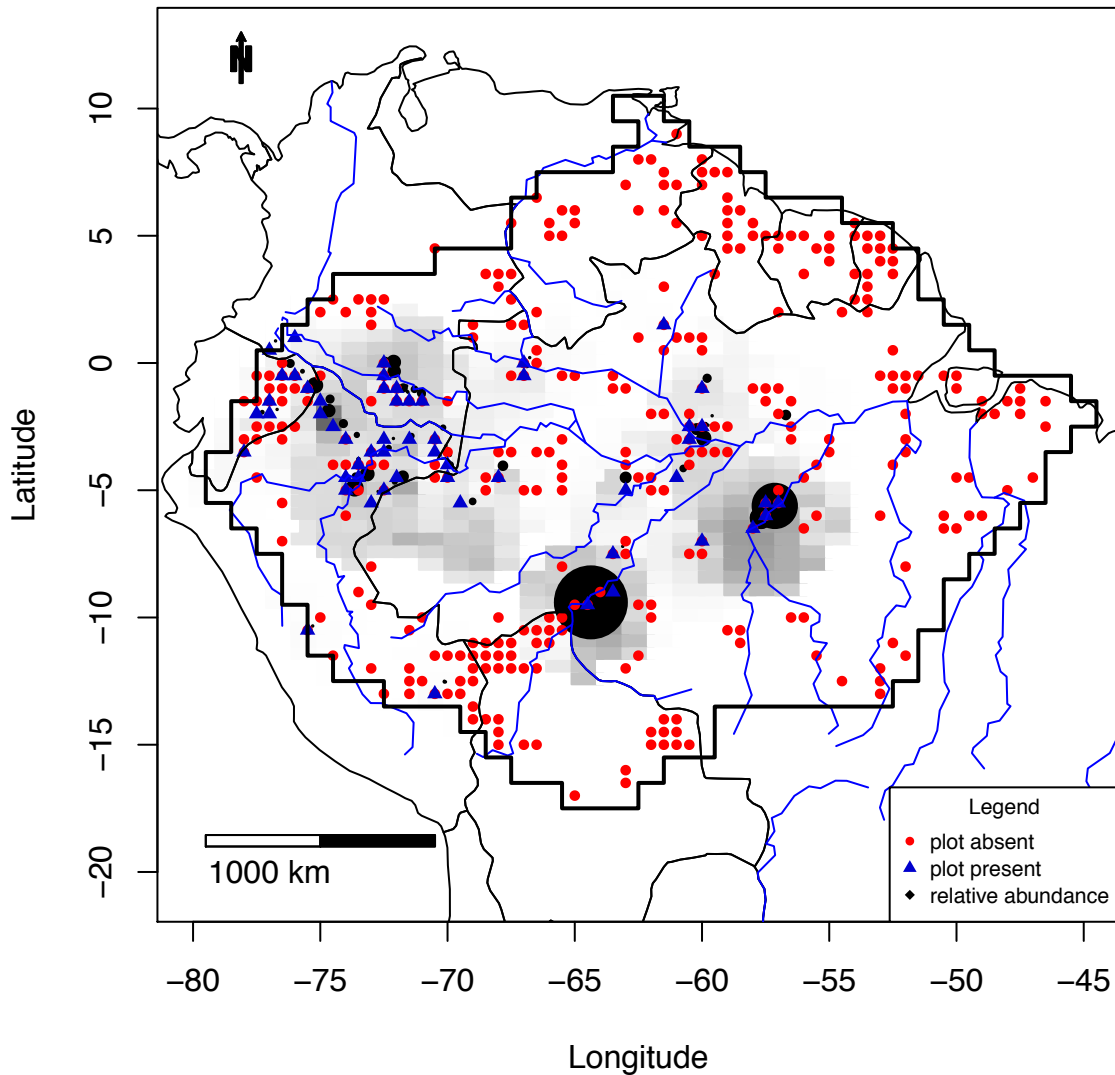

Figure S3\_57A Combined map of *Eschweilera truncata*

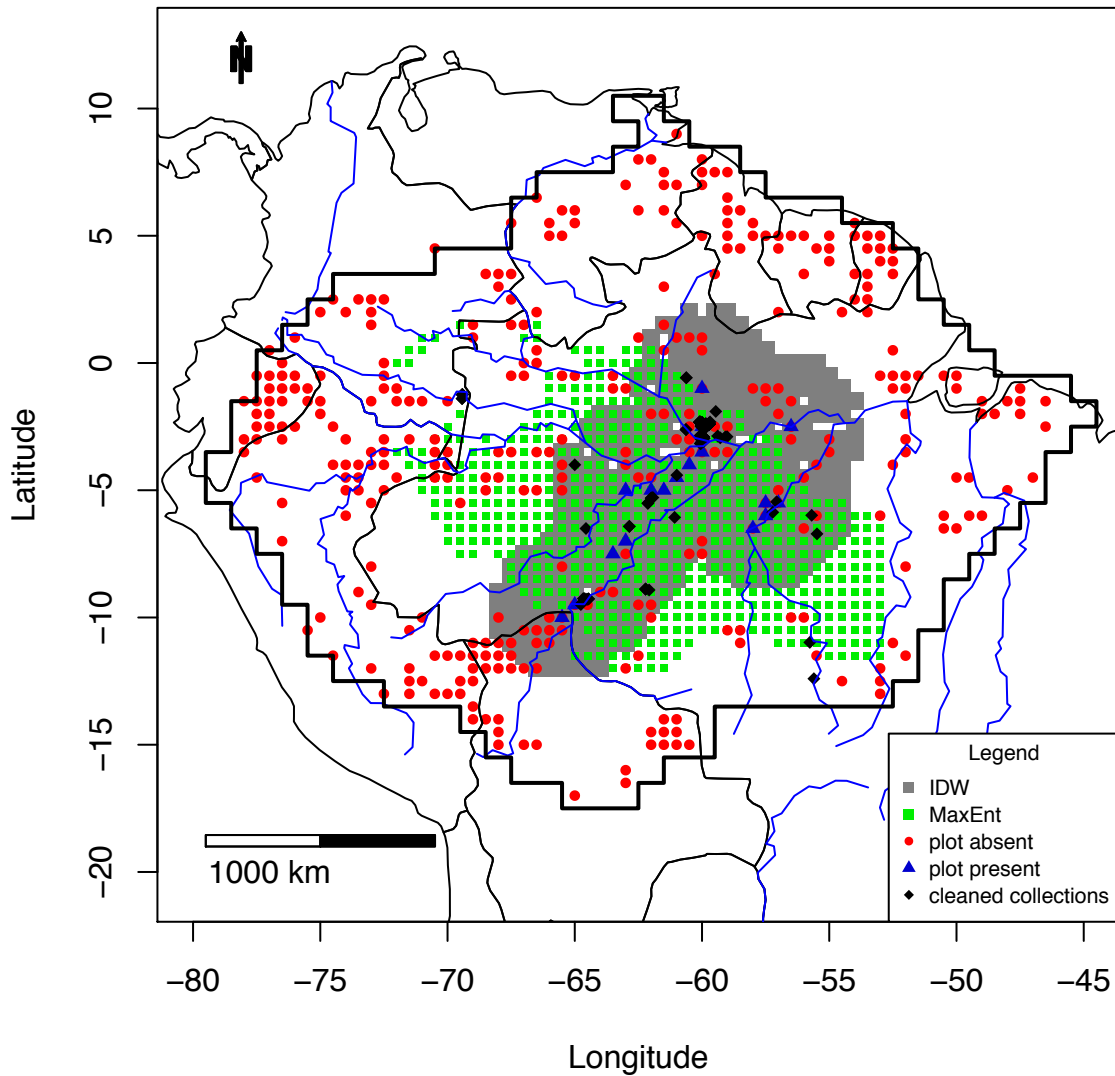

Figure S3\_57B MaxEnt map of *Eschweilera truncata*

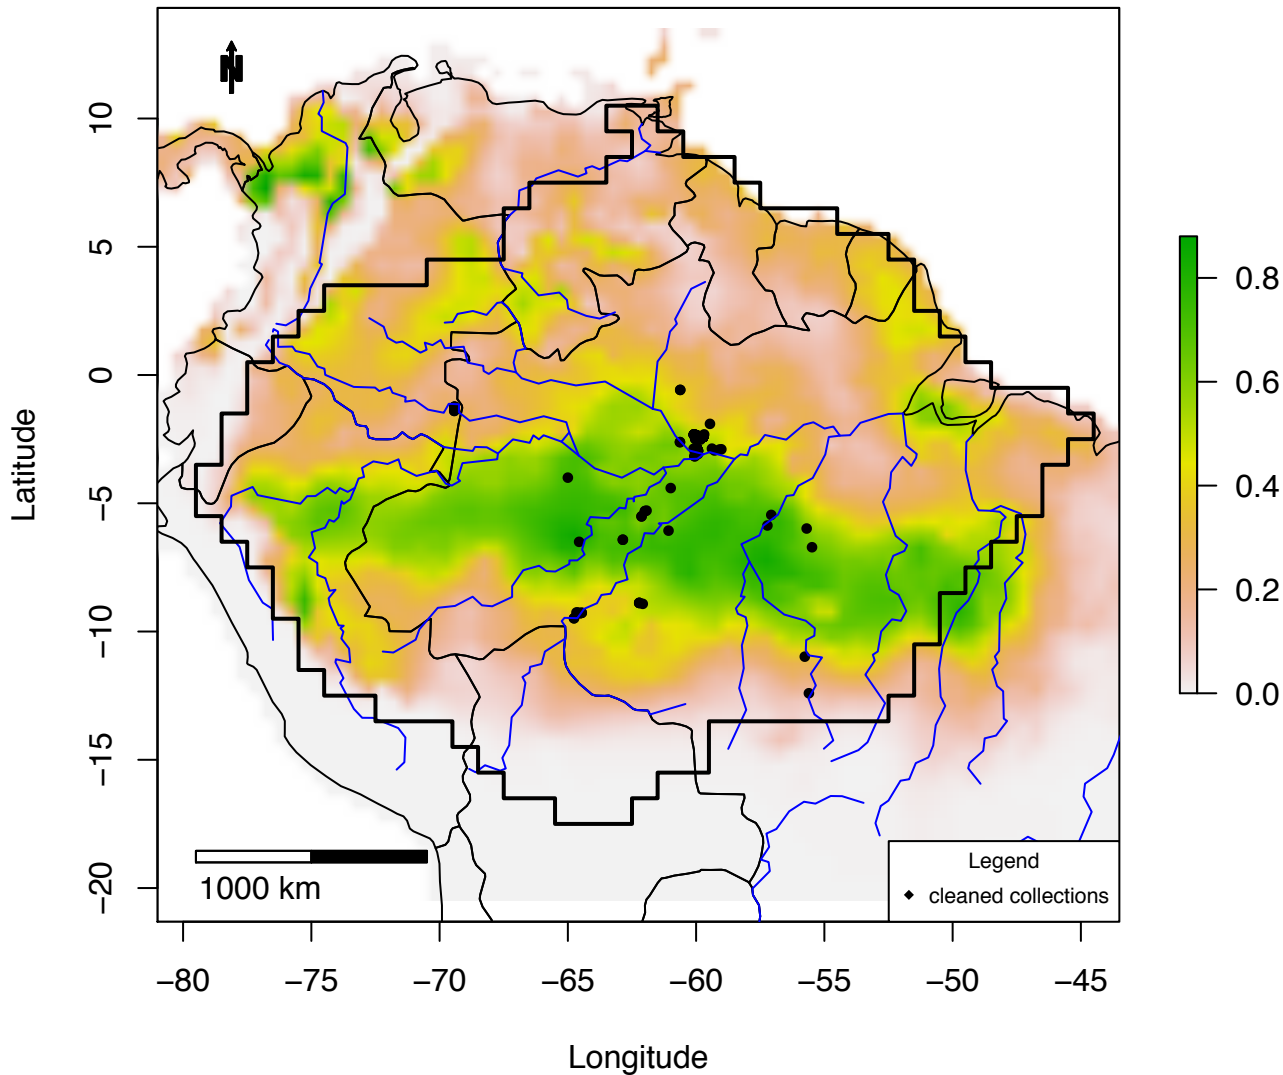

Figure S3\_57C IDW map of *Eschweilera truncata*:  
plots =0 – 0.13; IDW: 0 – 0.03

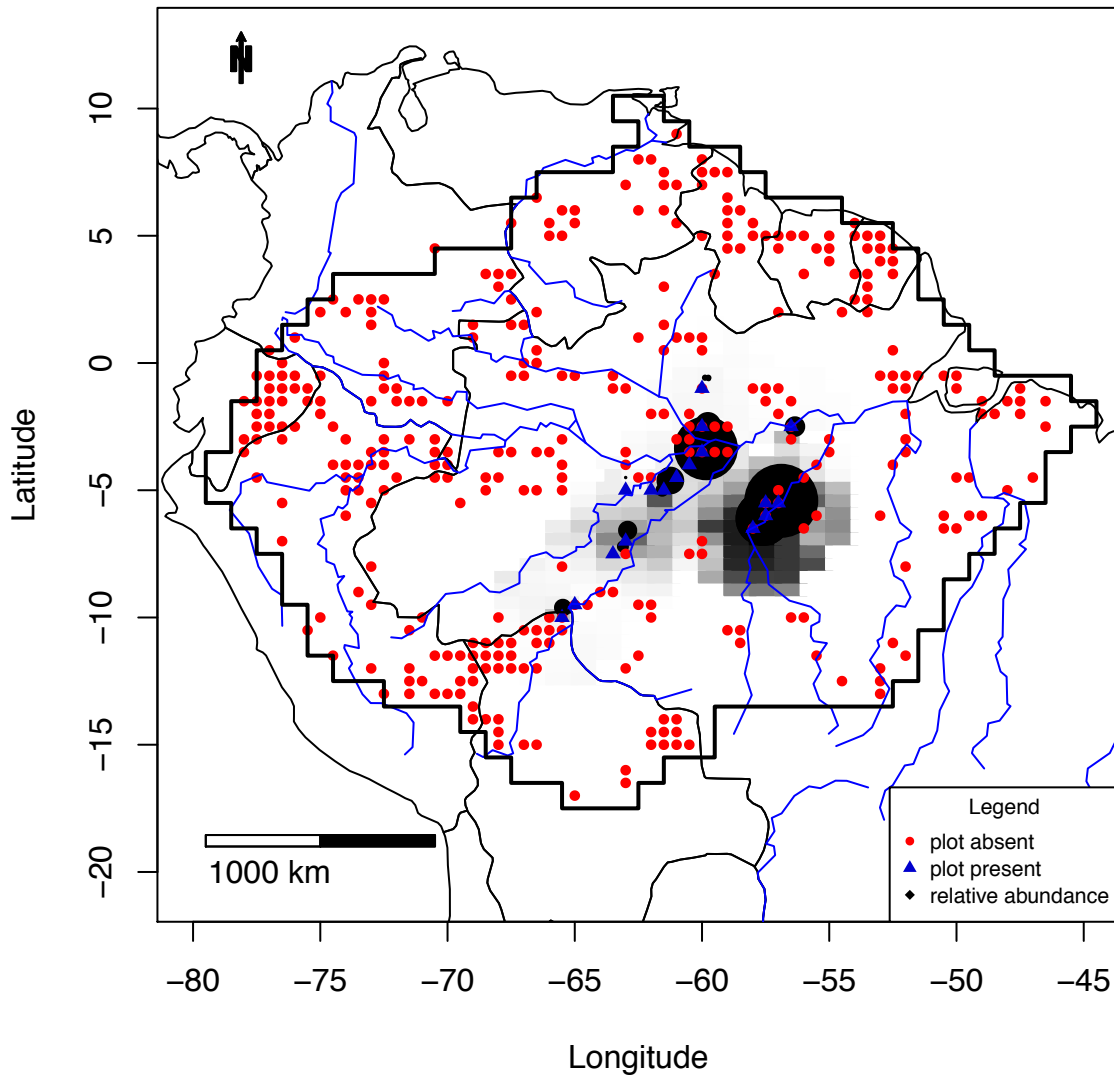

Figure S3\_58A Combined map of *Eschweilera\_wachenheimii*

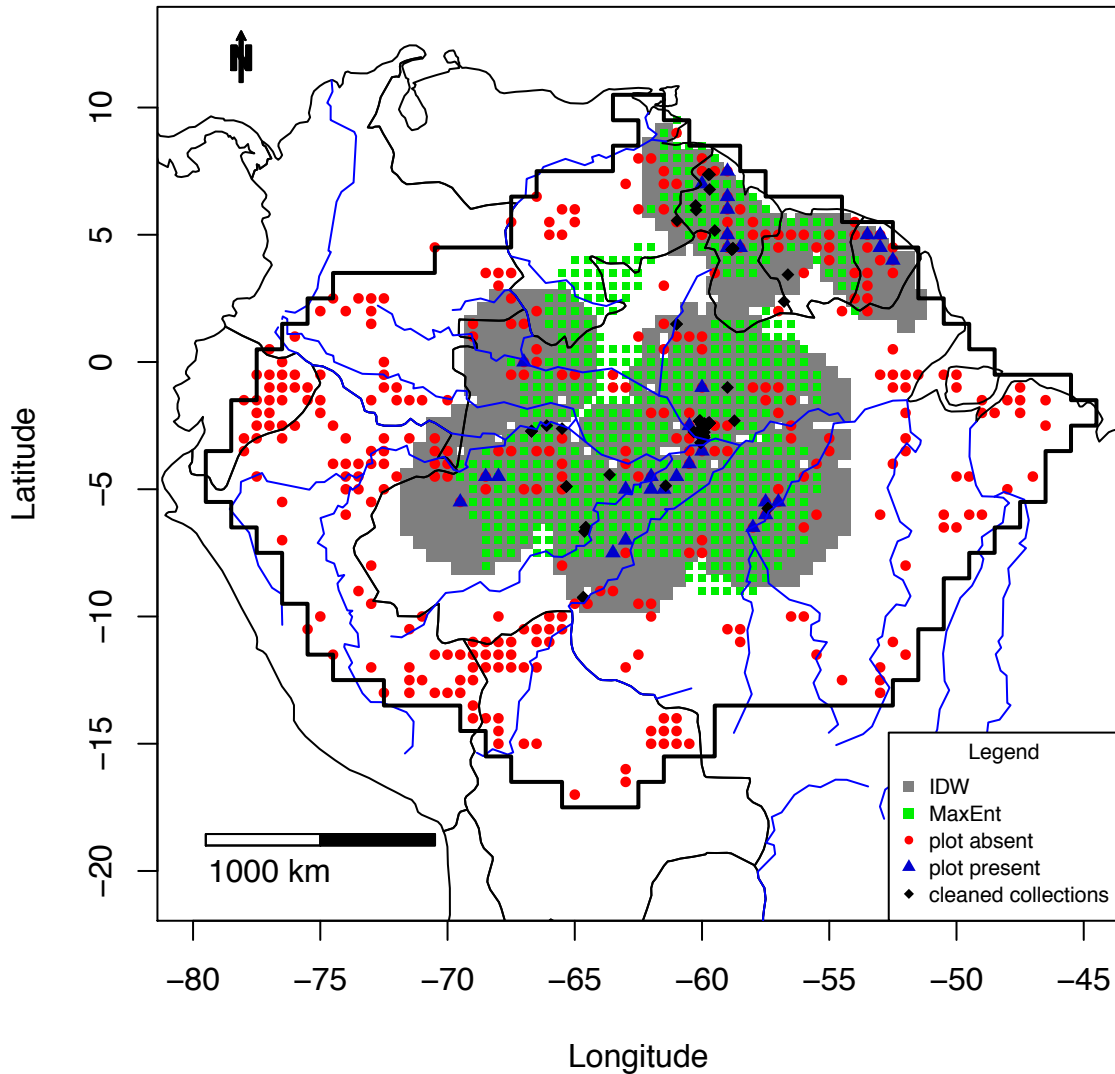

Figure S3\_58B MaxEnt map of *Eschweilera\_wachenheimii*

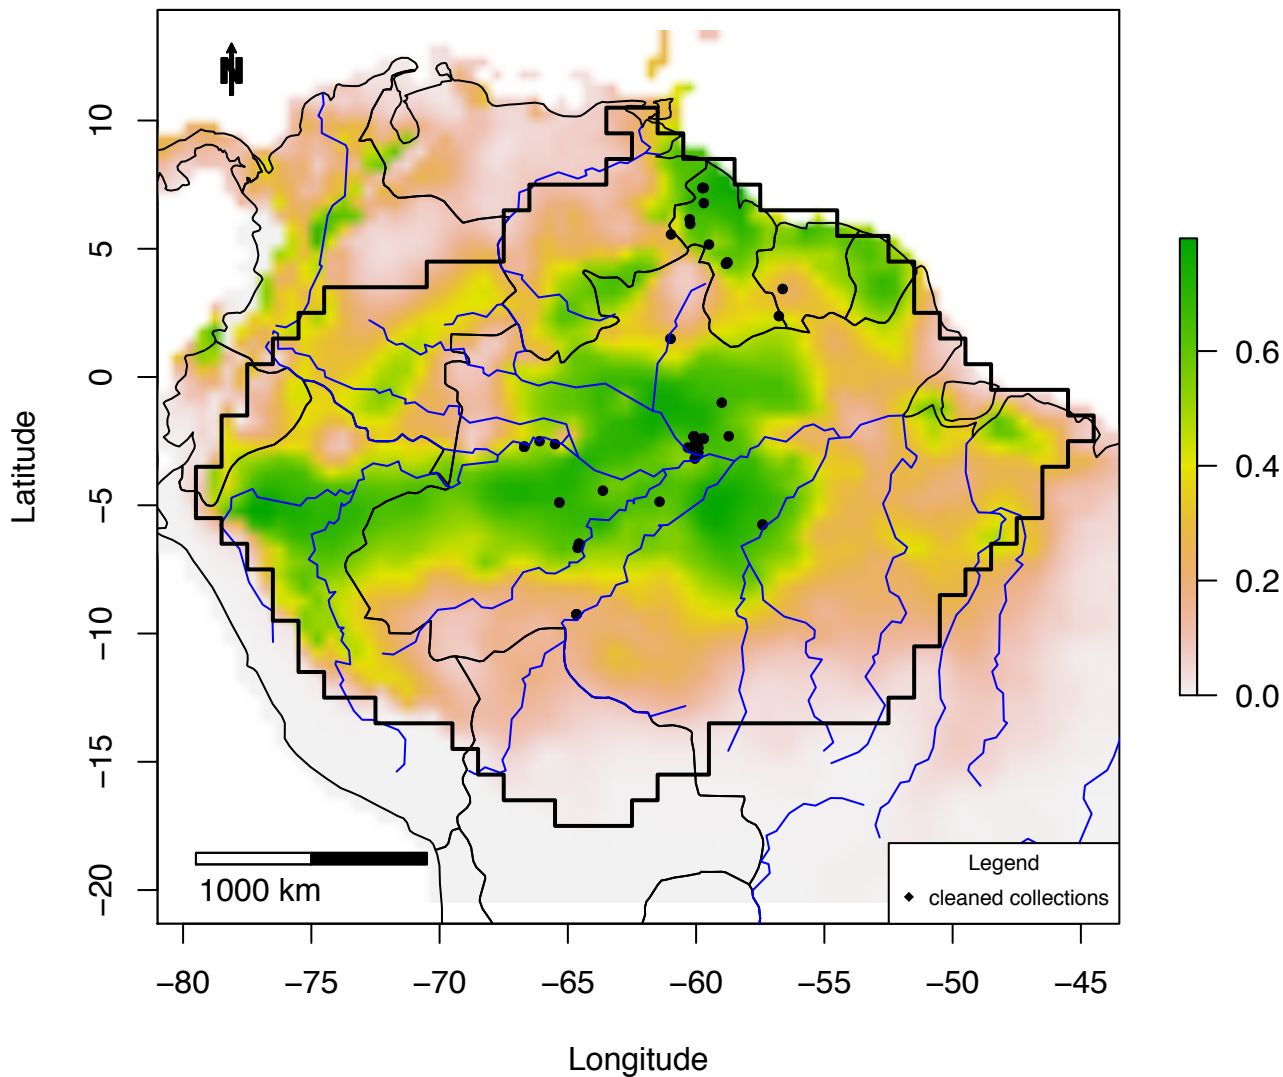

Figure S3\_58C IDW map of *Eschweilera wachenheimii*:  
plots =0 – 0.13; IDW: 0 – 0.06

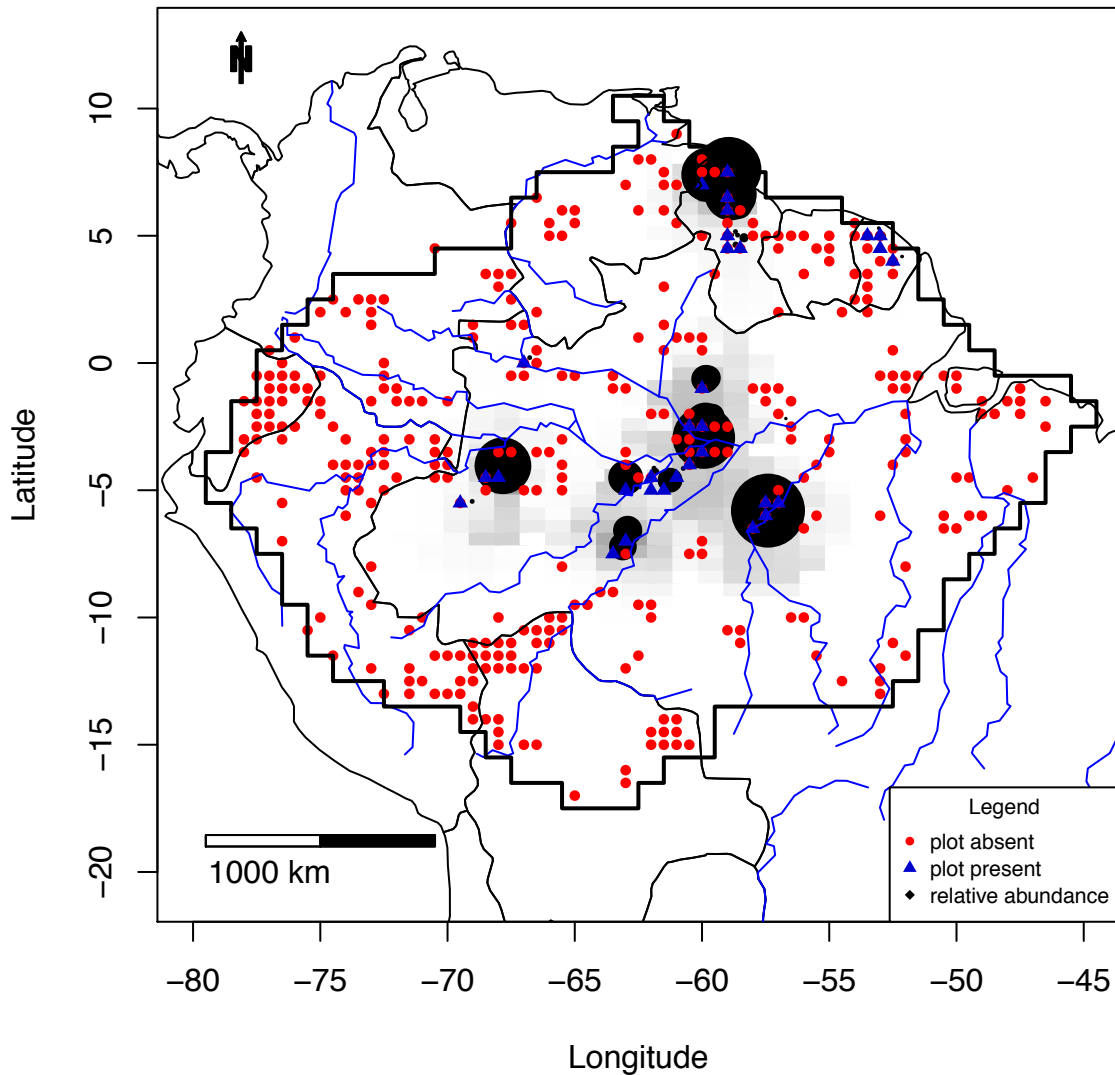

Figure S3\_59A Combined map of *Euterpe\_oleracea*

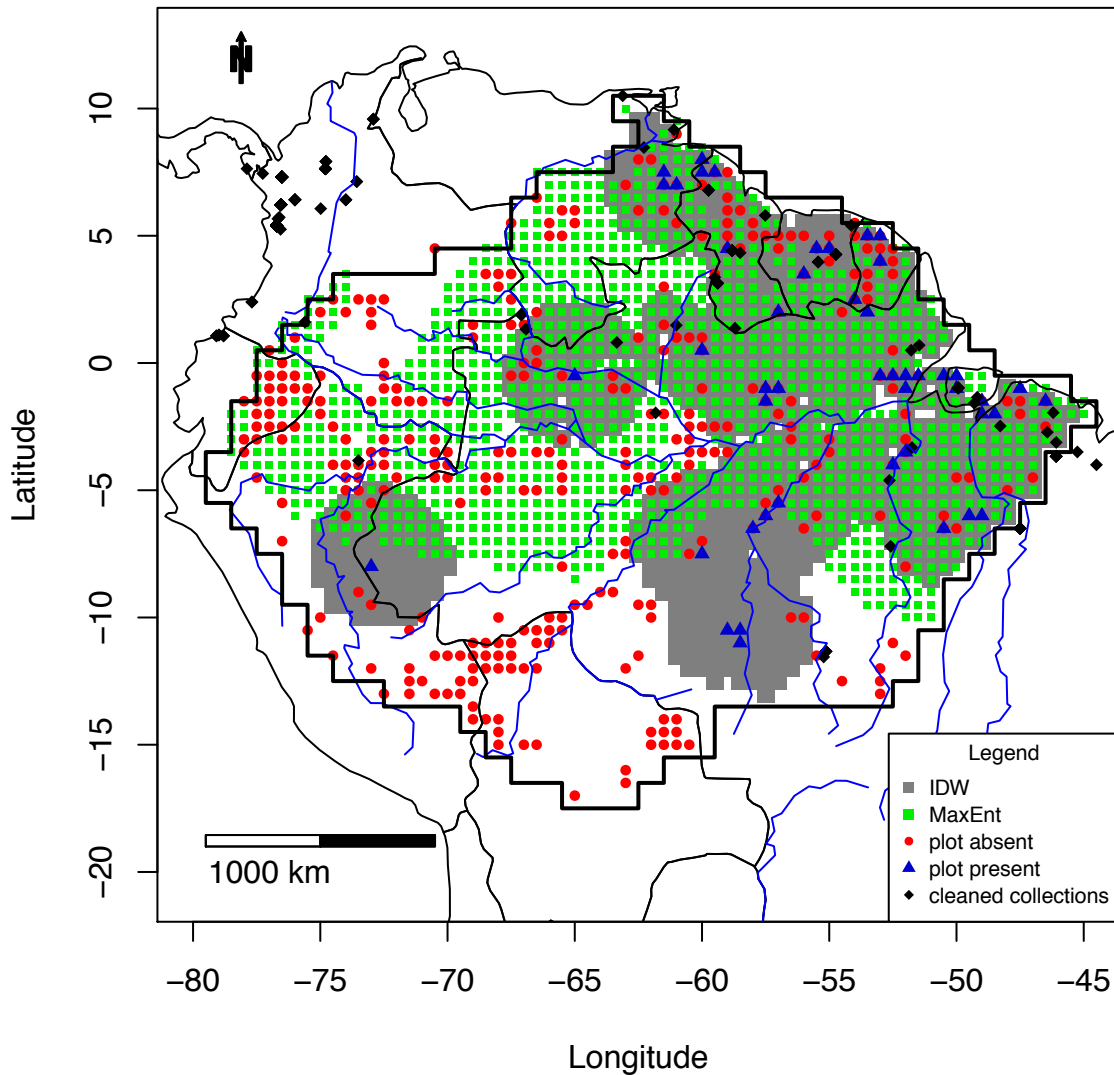



Figure S3\_59B MaxEnt map of *Euterpe\_oleracea*

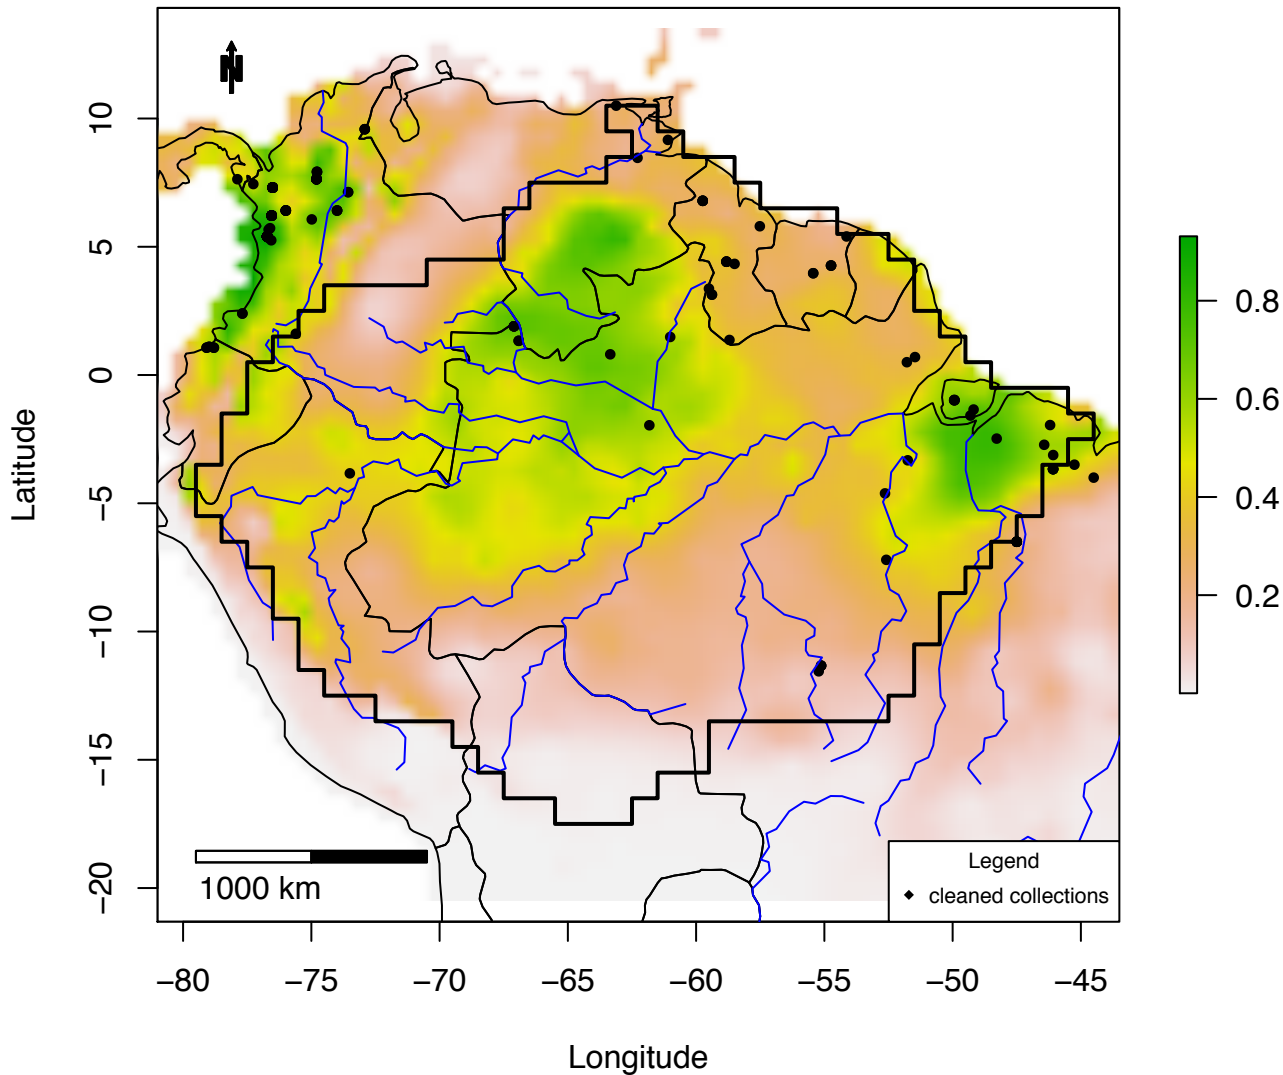

Figure S3\_59C IDW map of *Euterpe\_oleracea*:  
plots =0 – 0.59; IDW: 0 – 0.2

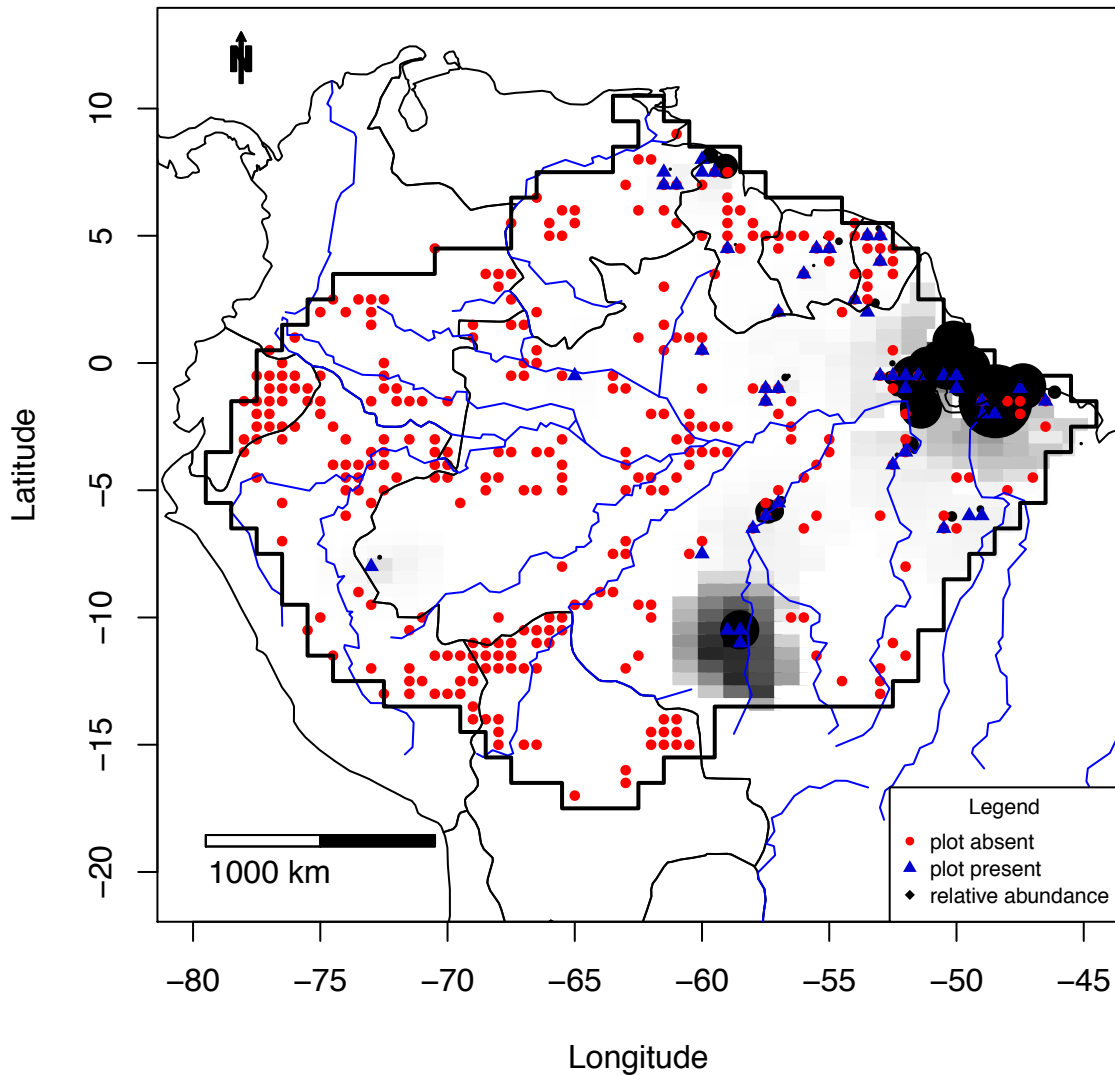

Figure S3\_60A Combined map of *Euterpe\_precatoria*

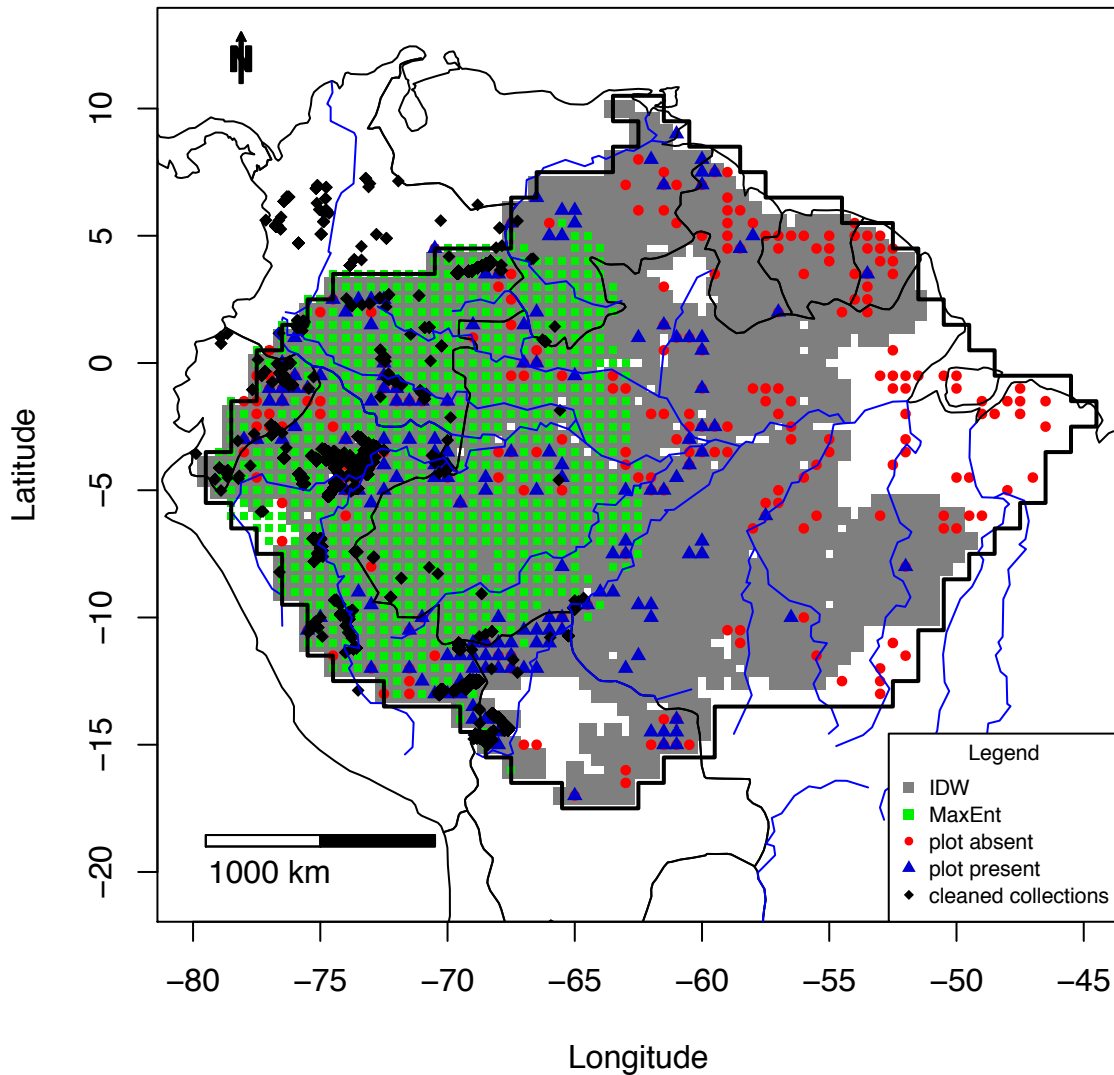

Figure S3\_60B MaxEnt map of *Euterpe\_precatoria*

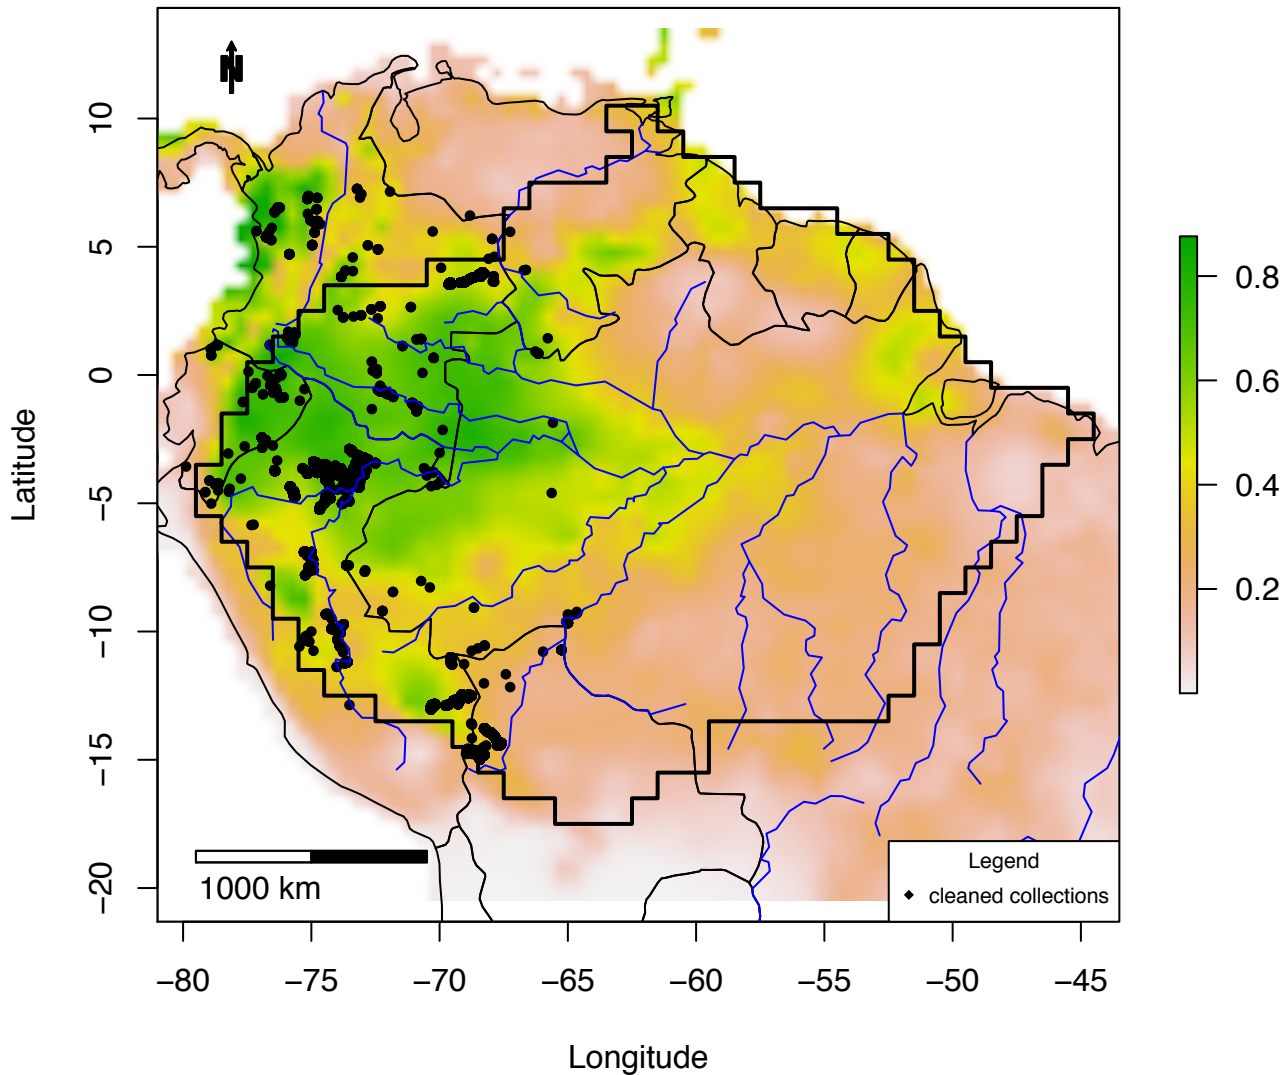

**Figure S3\_60C IDW map of *Euterpe precatoria*:**  
plots =0 – 0.36; IDW: 0 – 0.13

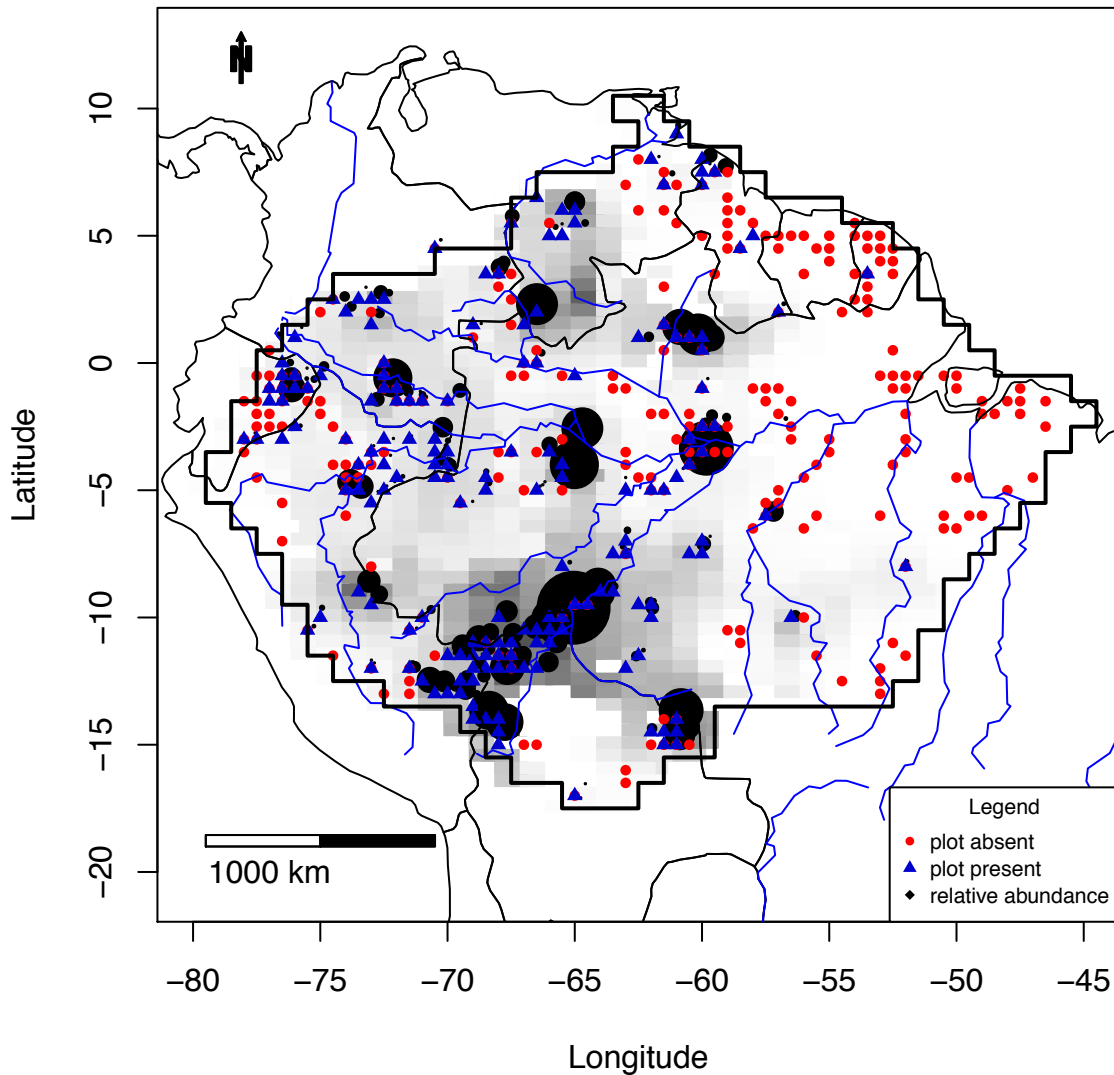

Figure S3\_61A Combined map of *Garcinia\_macrophylla*

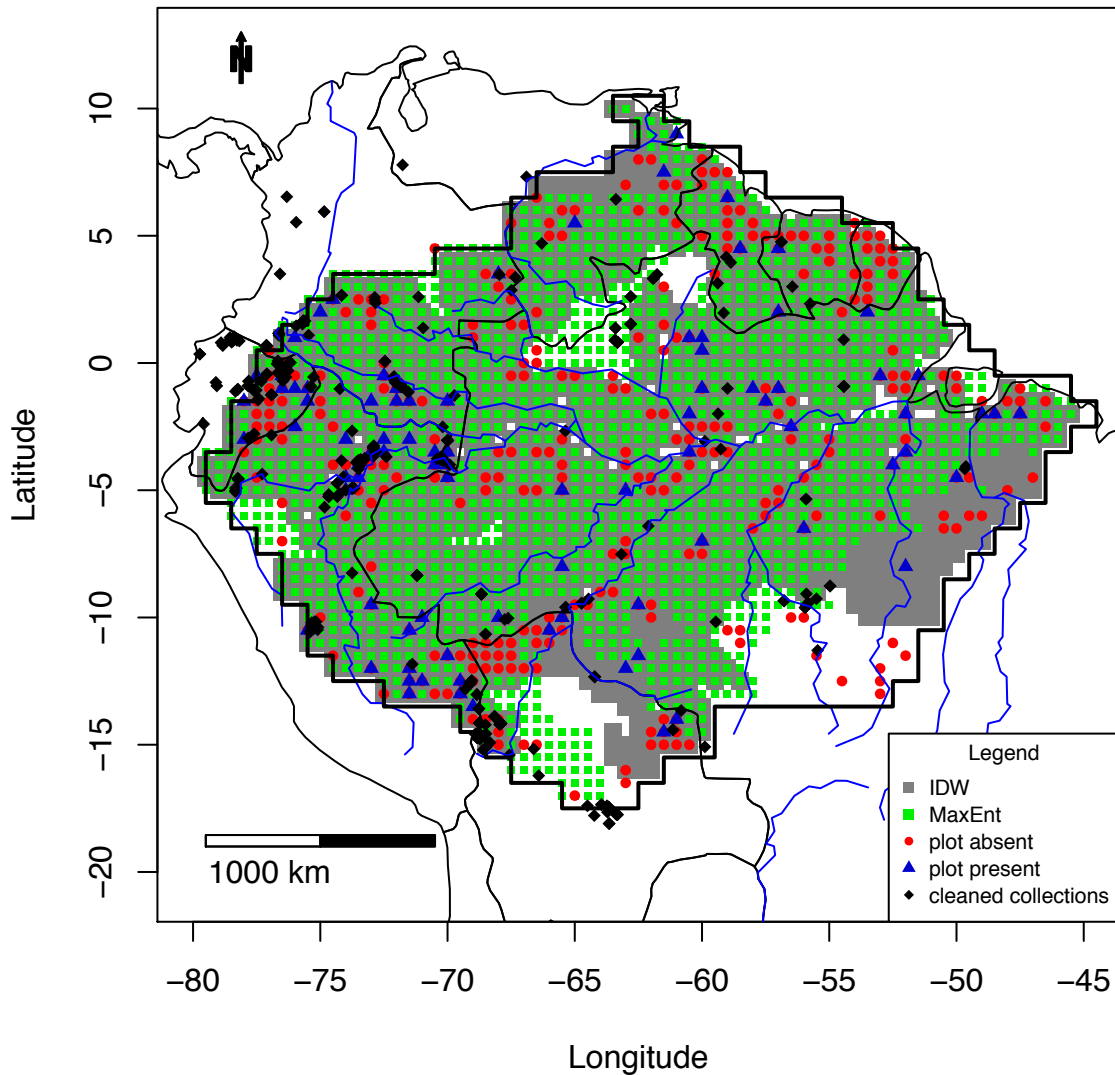

Figure S3\_61B MaxEnt map of *Garcinia\_macrophylla*

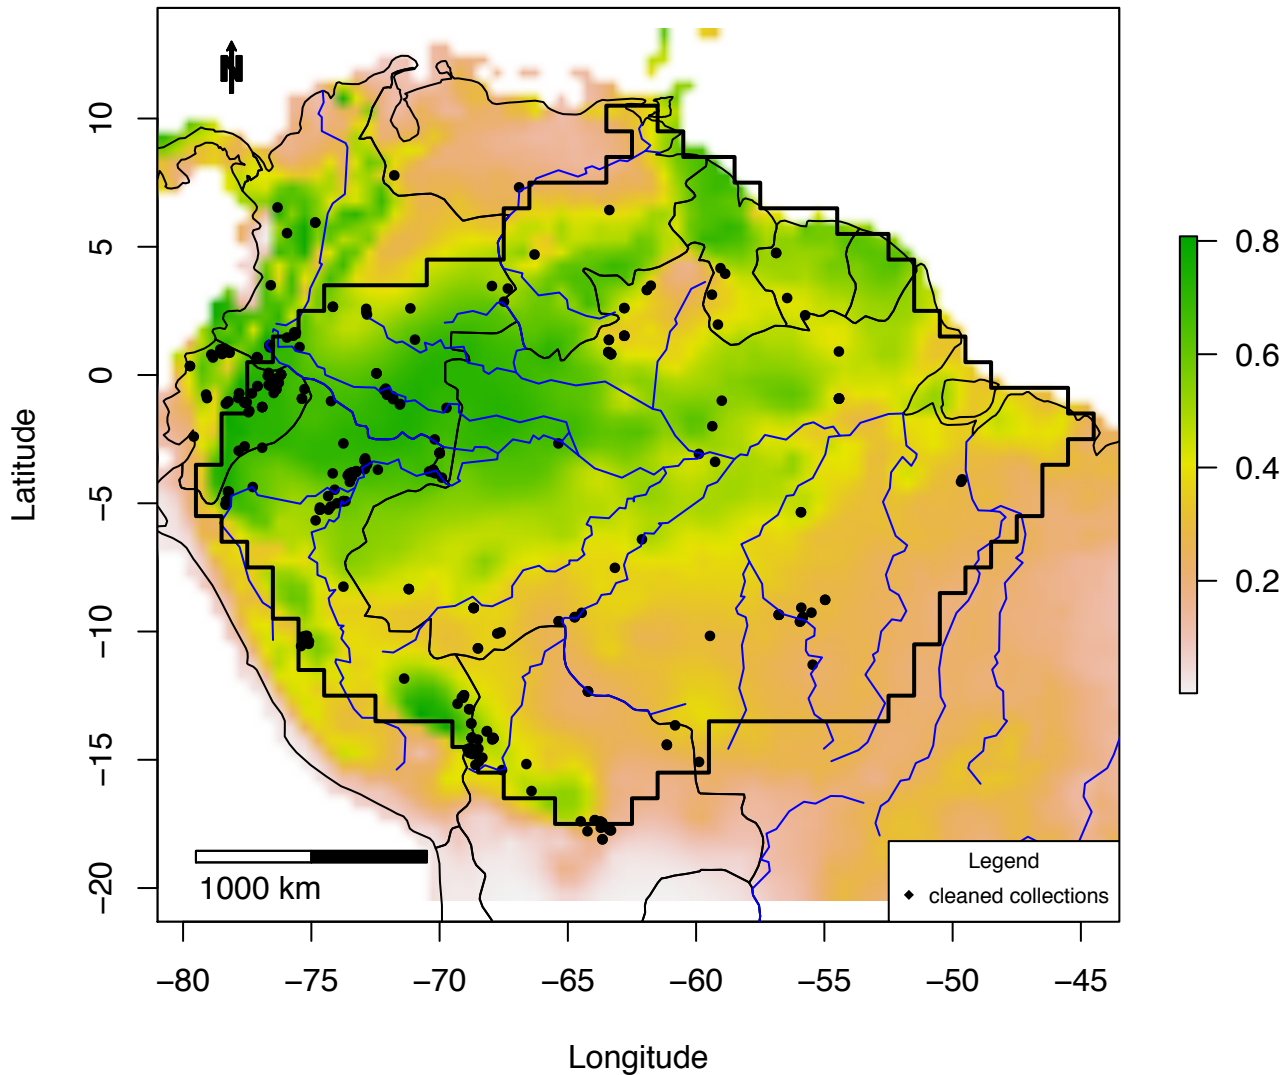

Figure S3\_61C IDW map of *Garcinia macrophylla*:  
plots =0 – 0.08; IDW: 0 – 0.02

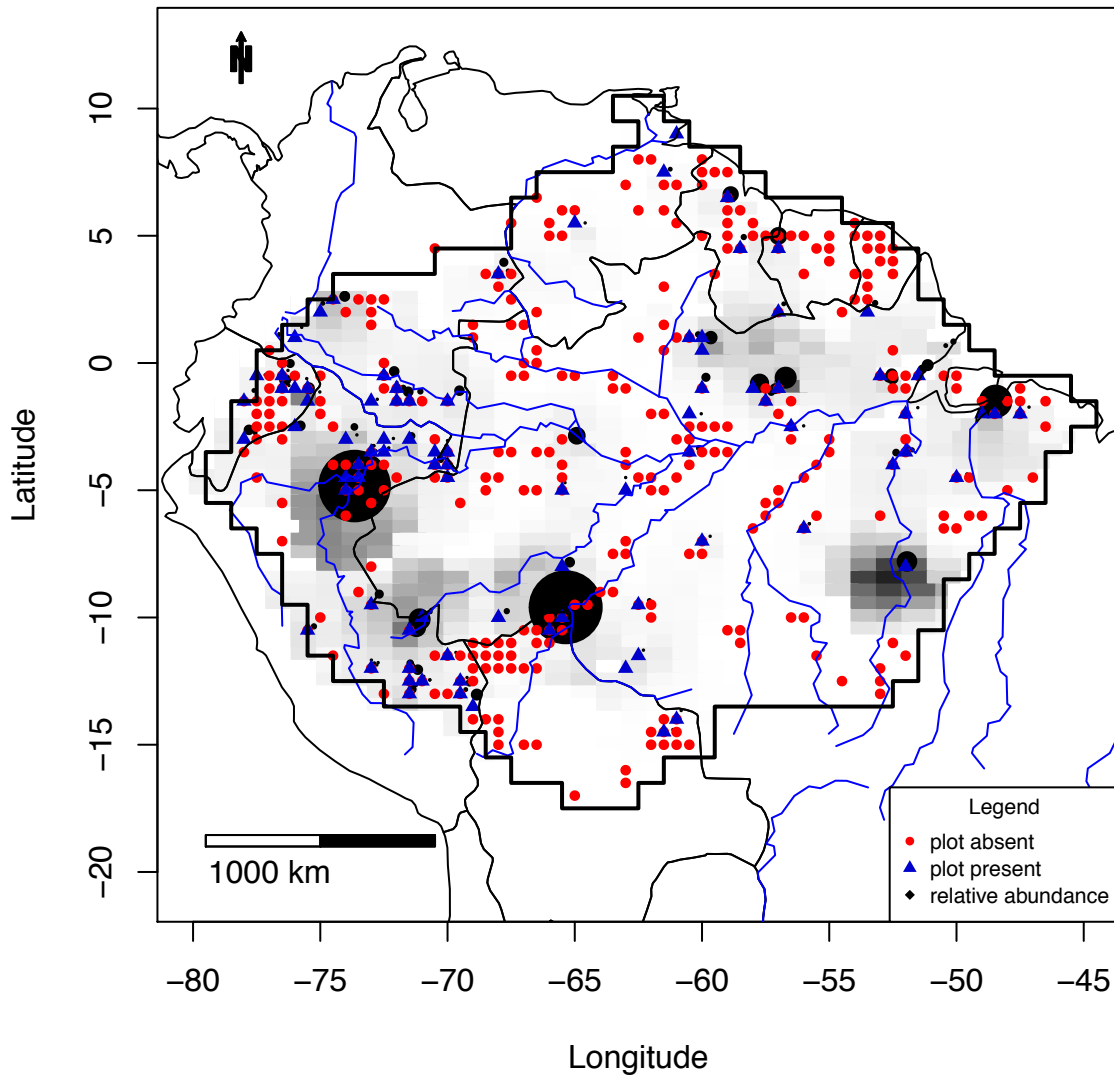



Figure S3\_62A Combined map of *Goupia\_glabra*

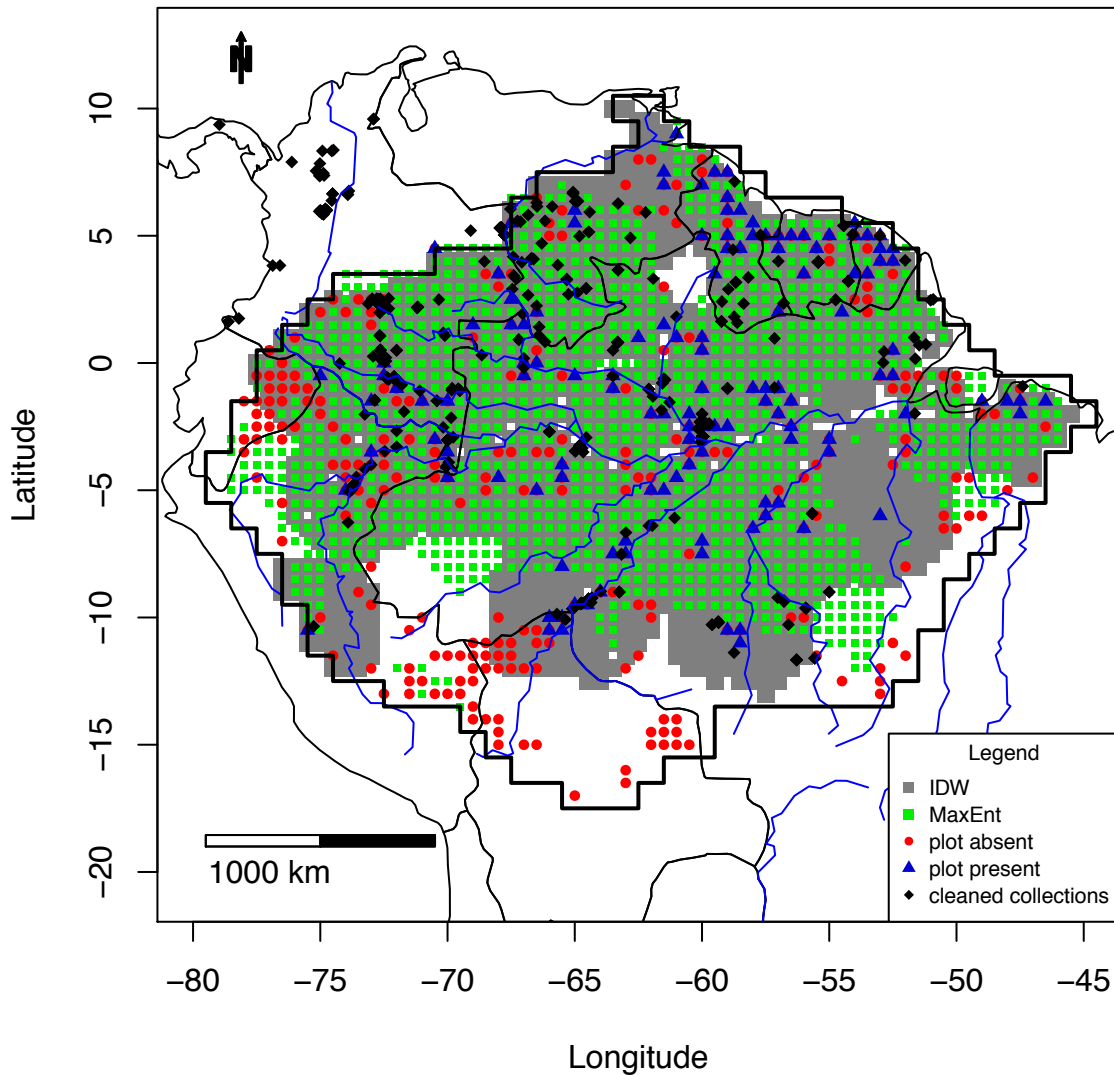

Figure S3\_62B MaxEnt map of *Goupia\_glabra*

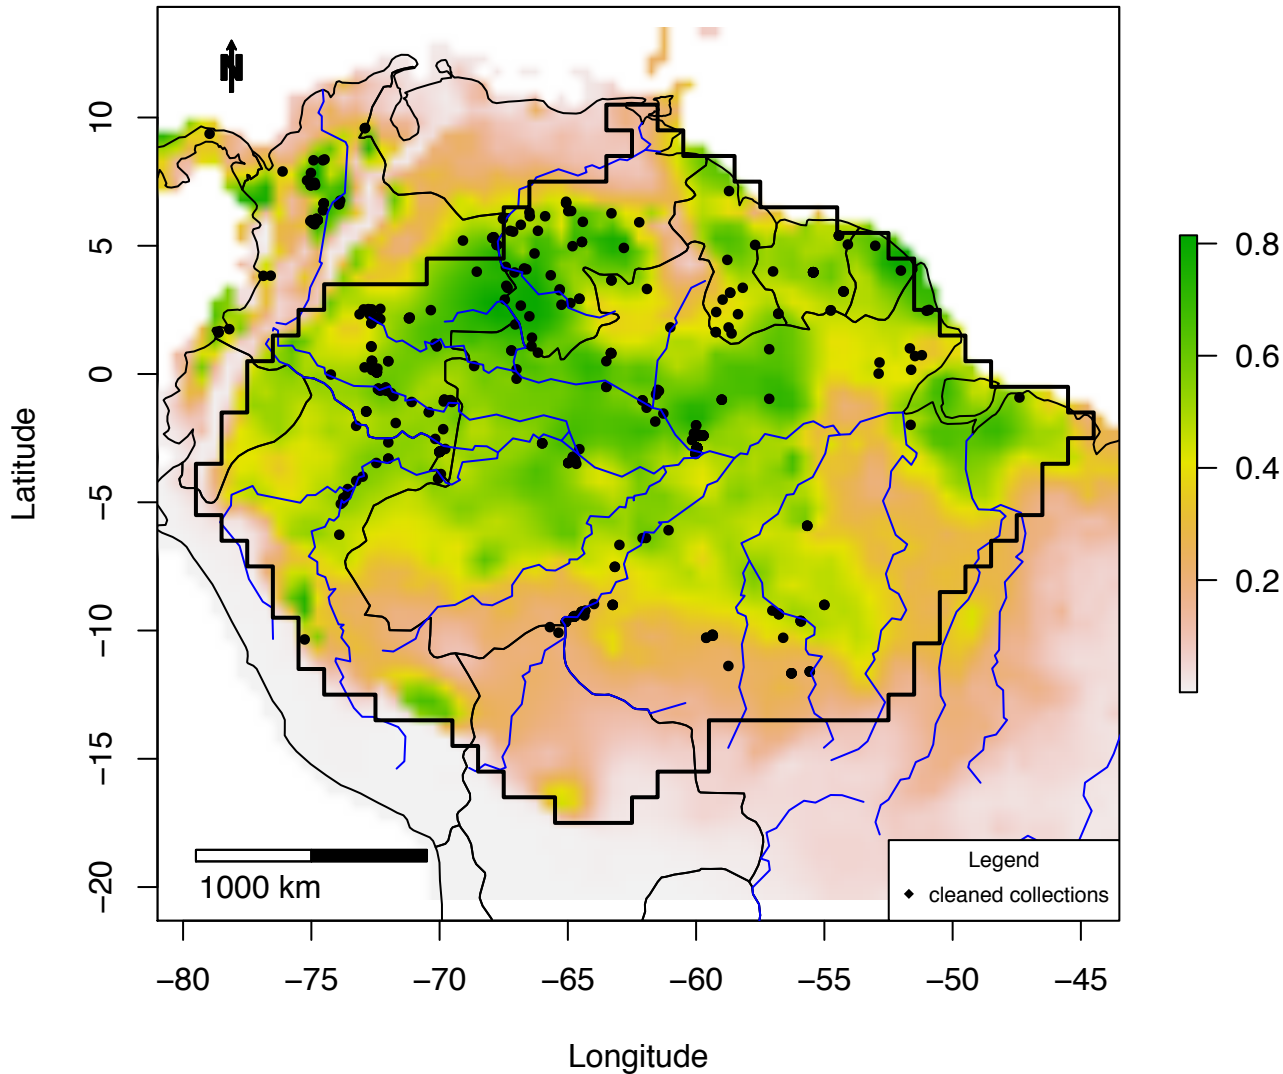

Figure S3\_62C IDW map of *Goupia glabra*:  
plots =0 – 0.13; IDW: 0 – 0.03

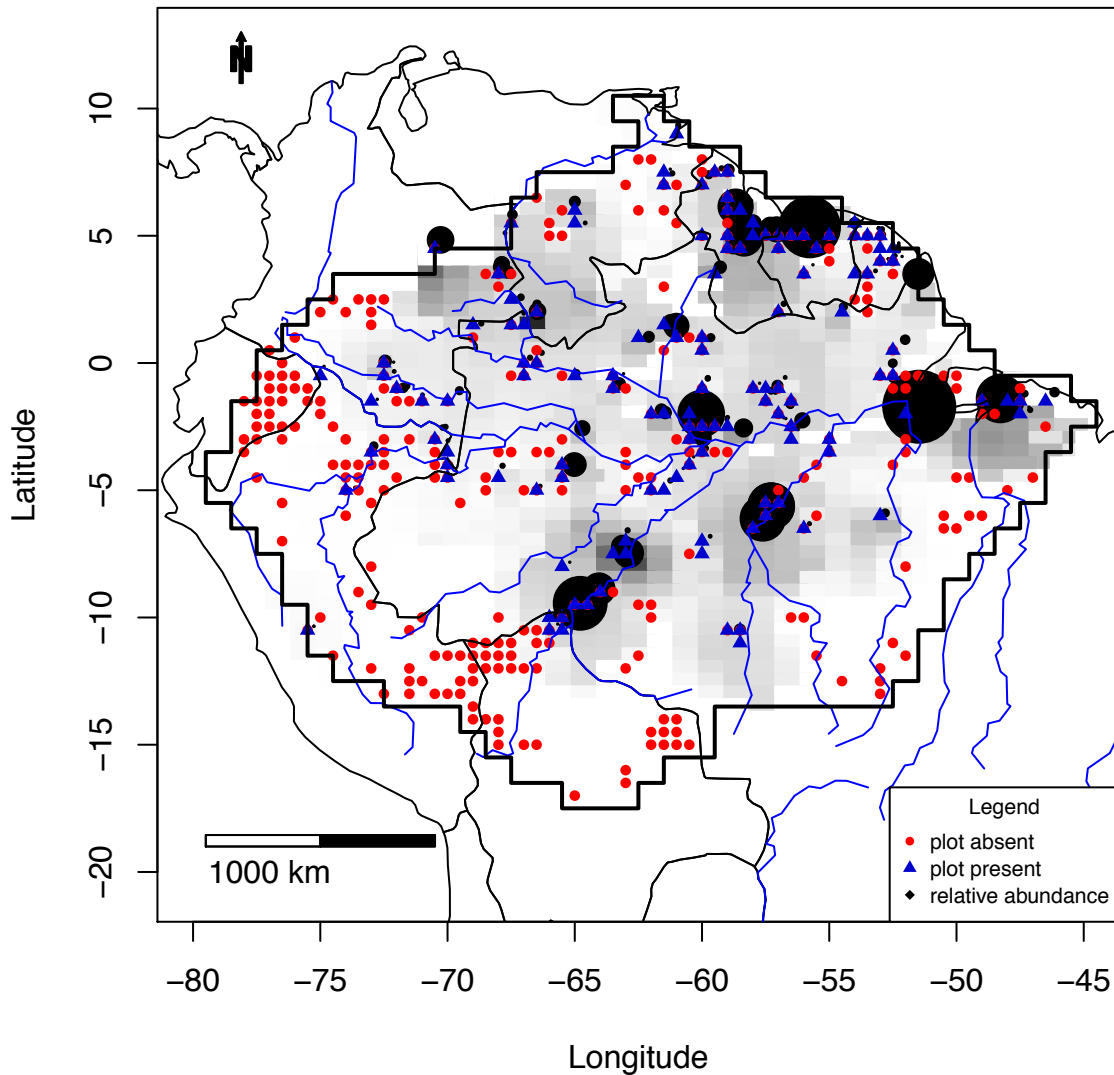

Figure S3\_63A Combined map of *Guarea macrophylla*

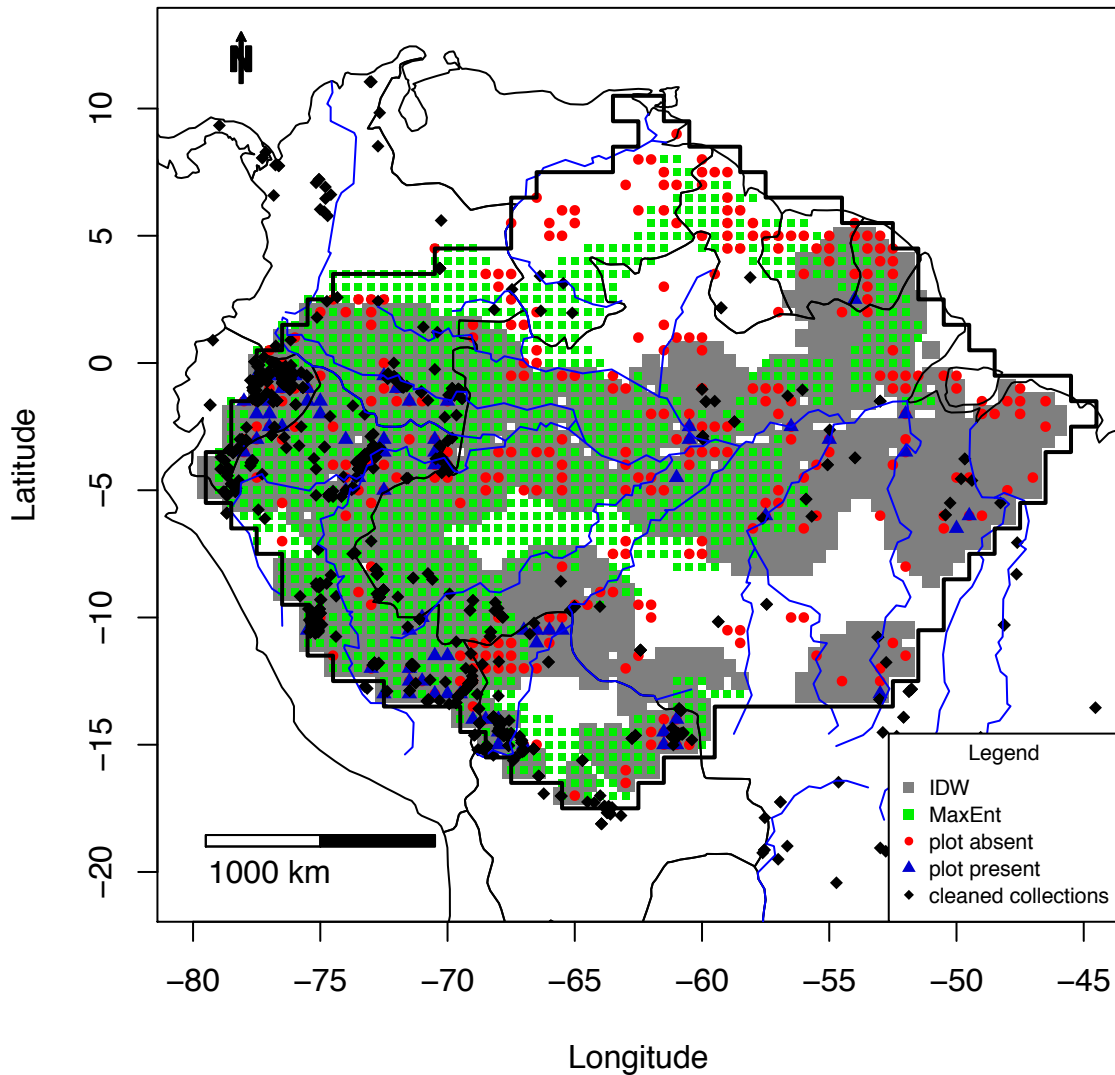

Figure S3\_63B MaxEnt map of *Guarea macrophylla*

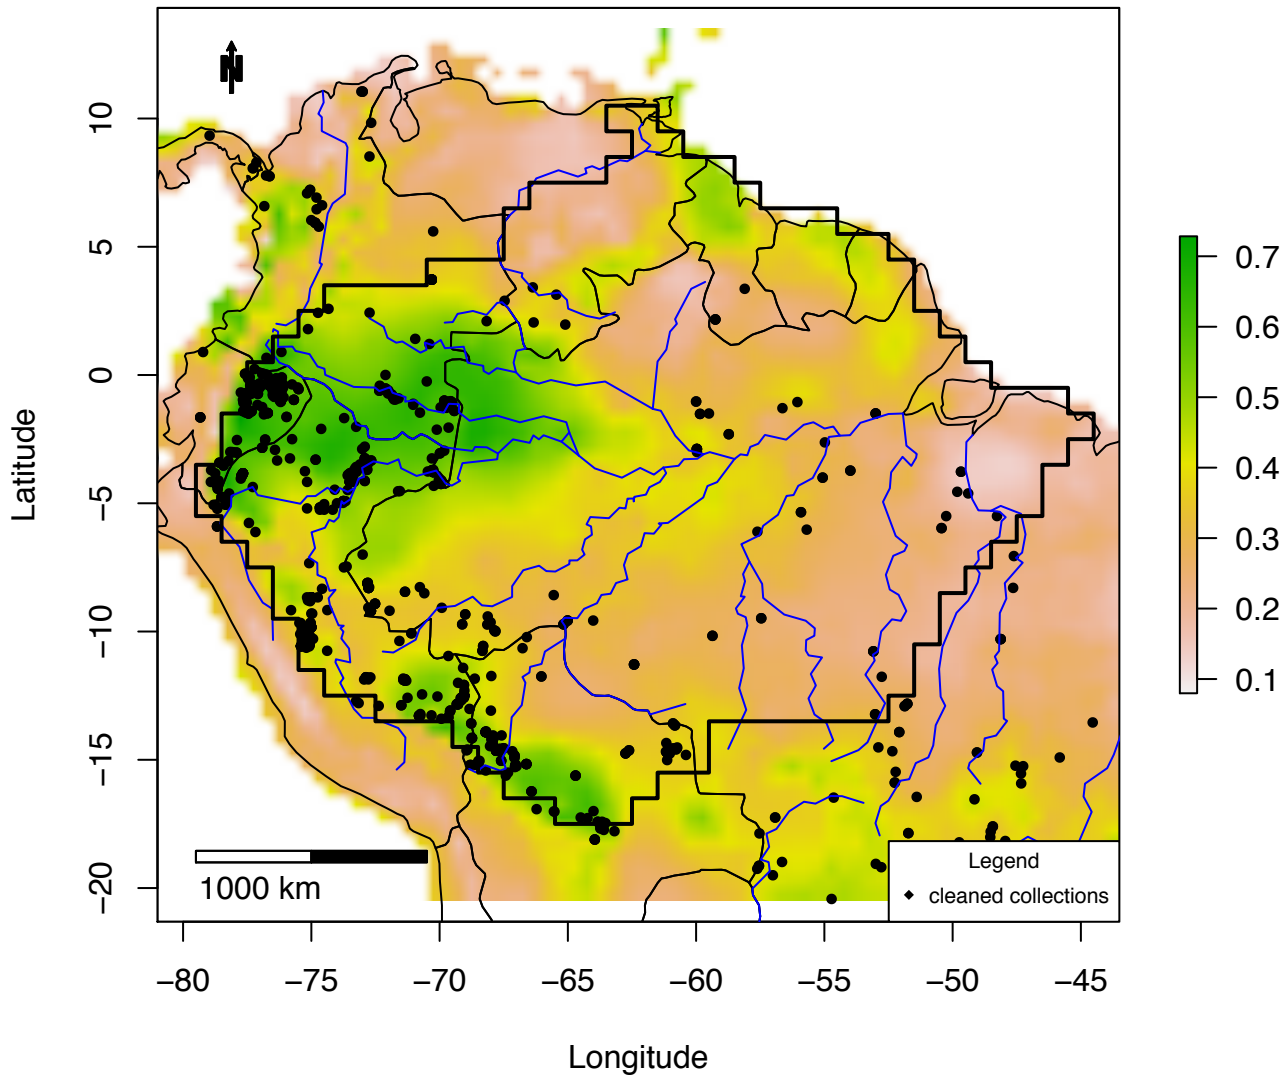

Figure S3\_63C IDW map of *Guarea macrophylla*:  
plots = 0 – 0.22; IDW: 0 – 0.06

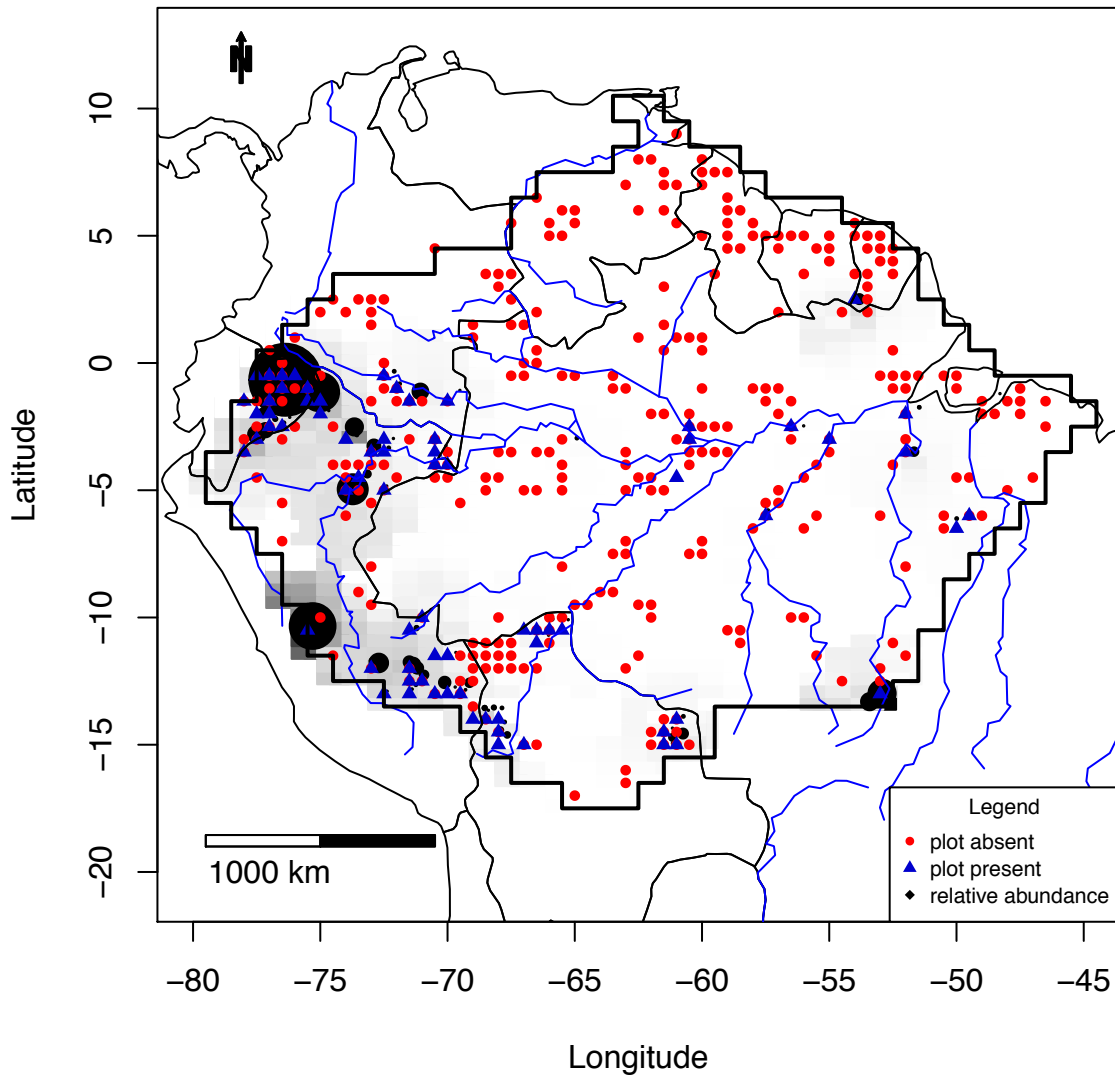

Figure S3\_64A Combined map of *Guarea\_silvatica*

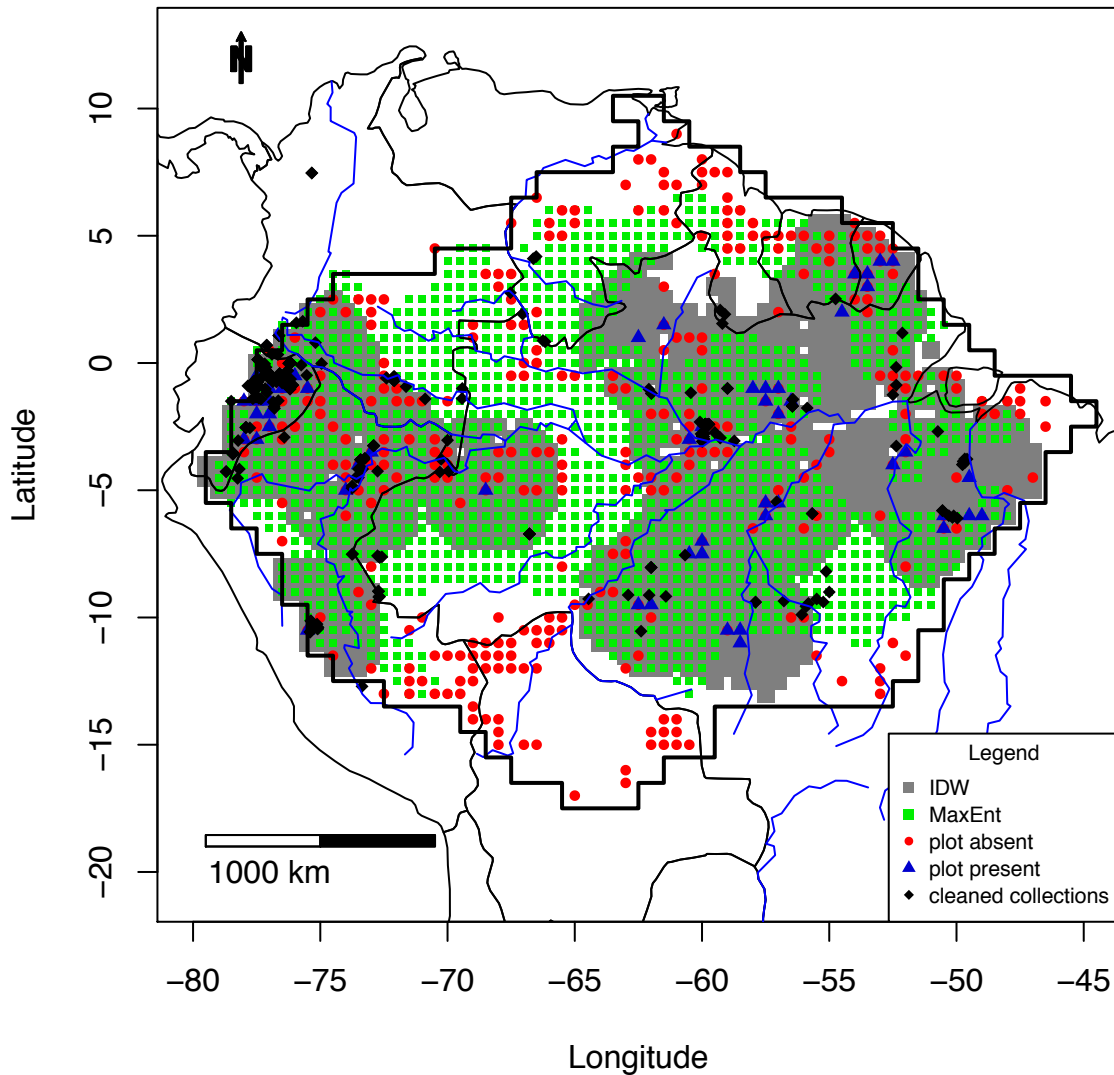

Figure S3\_64B MaxEnt map of *Guarea\_silvatica*

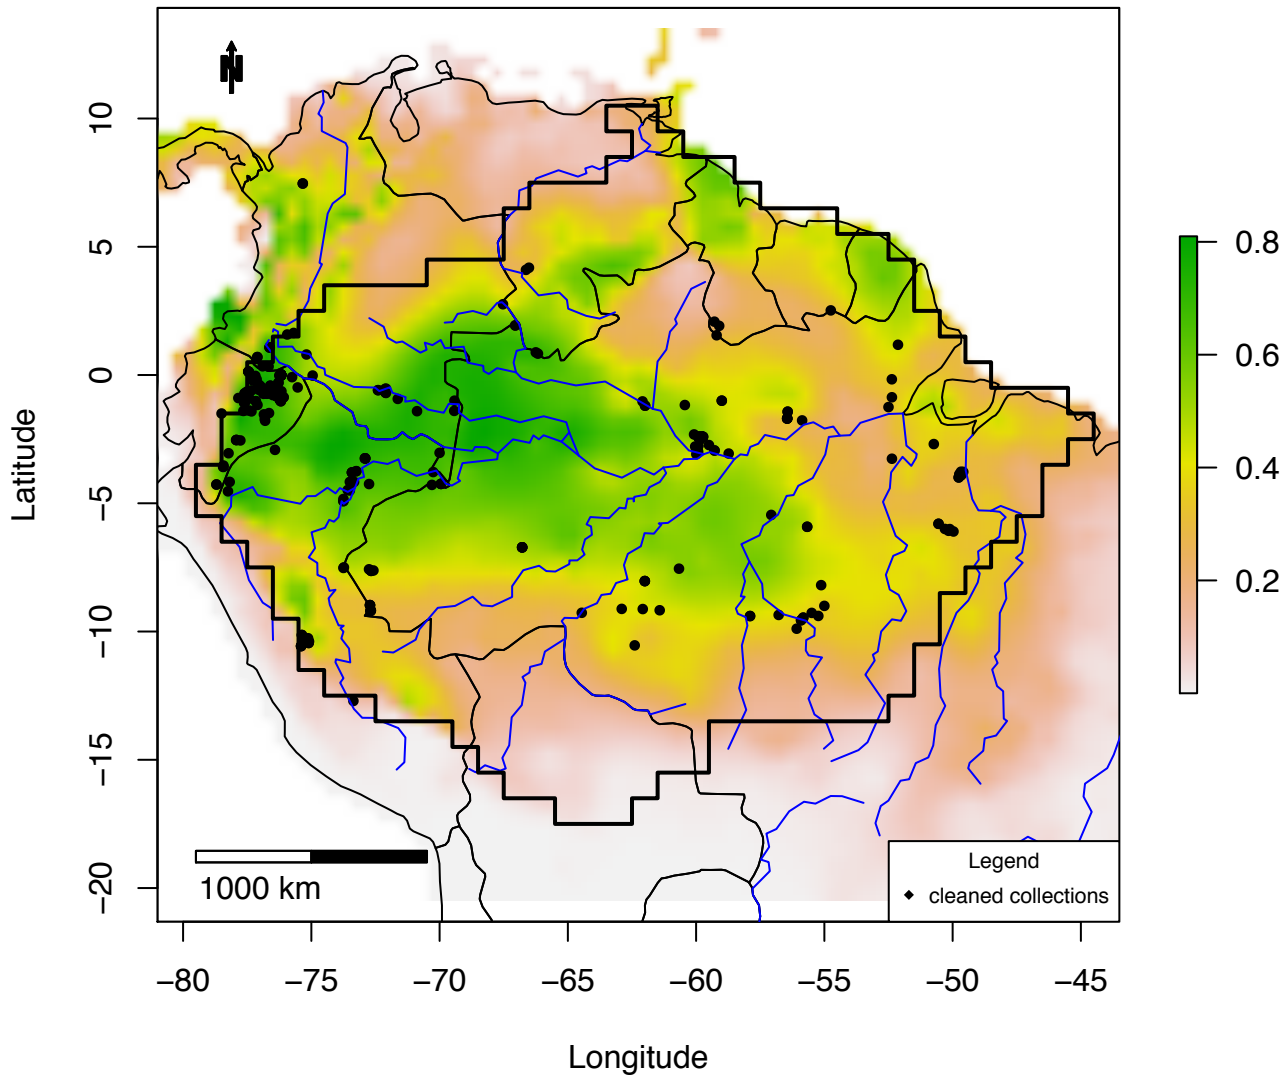



Figure S3\_64C IDW map of *Guarea\_silvatica*:  
plots =0 – 0.08; IDW: 0 – 0.04

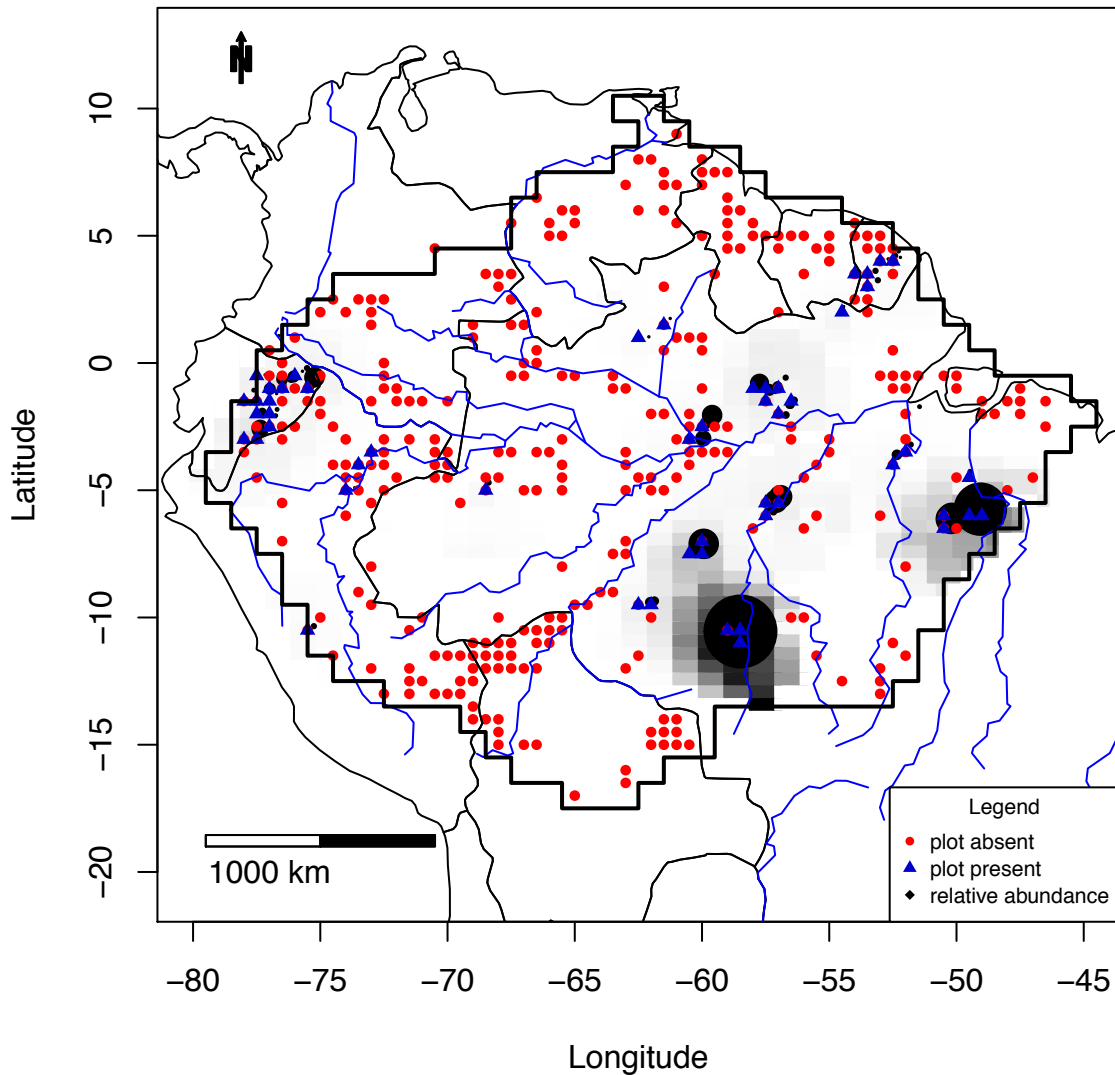

Figure S3\_65A Combined map of *Gustavia augusta*

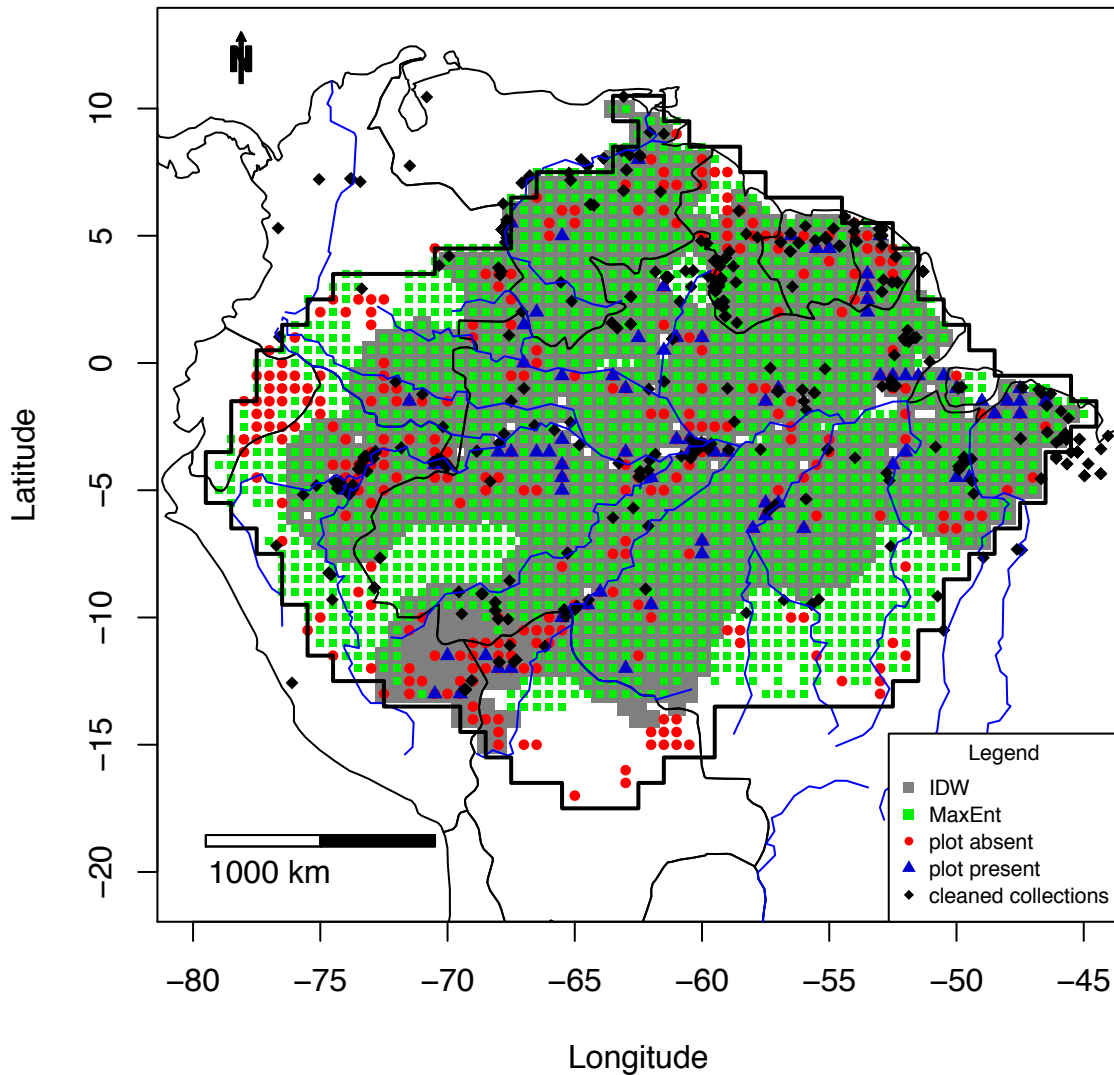

Figure S3\_65B MaxEnt map of *Gustavia augusta*

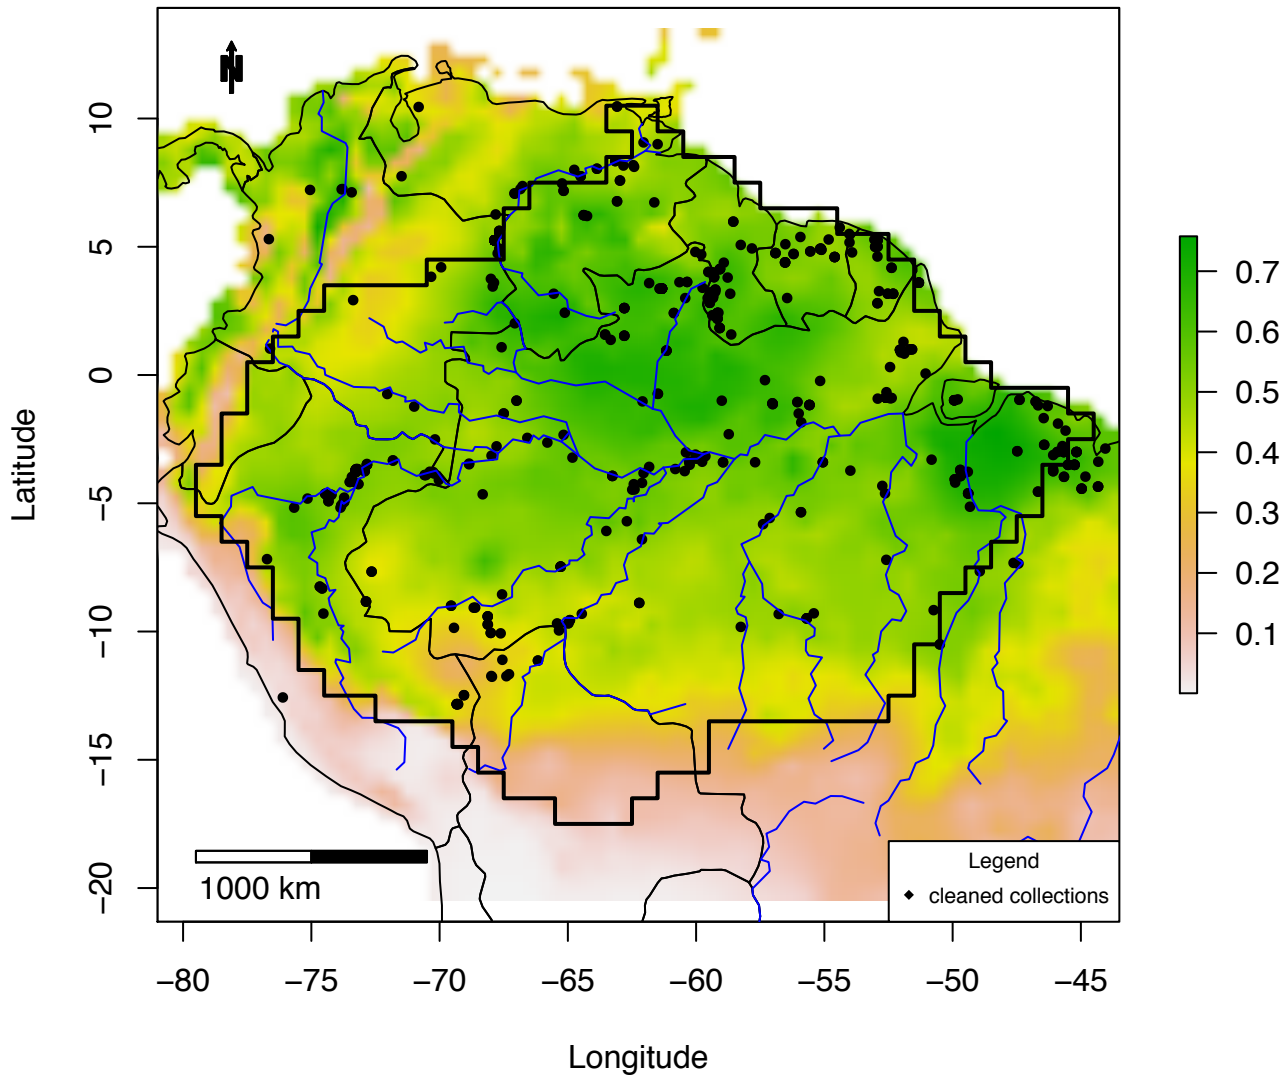

Figure S3\_65C IDW map of *Gustavia augusta*:  
plots =0 – 0.29; IDW: 0 – 0.16

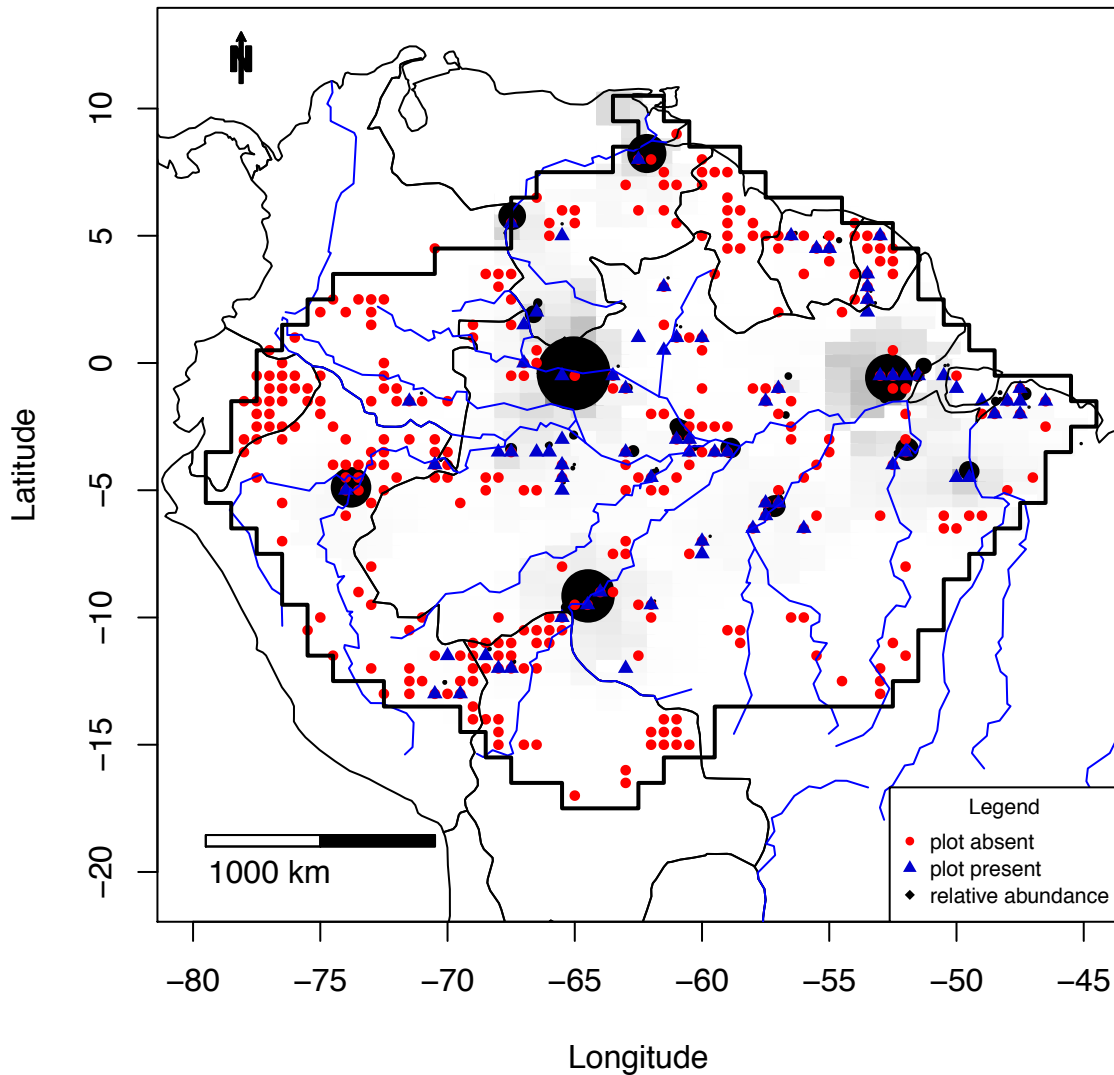

Figure S3\_66A Combined map of *Gustavia\_hexapetala*

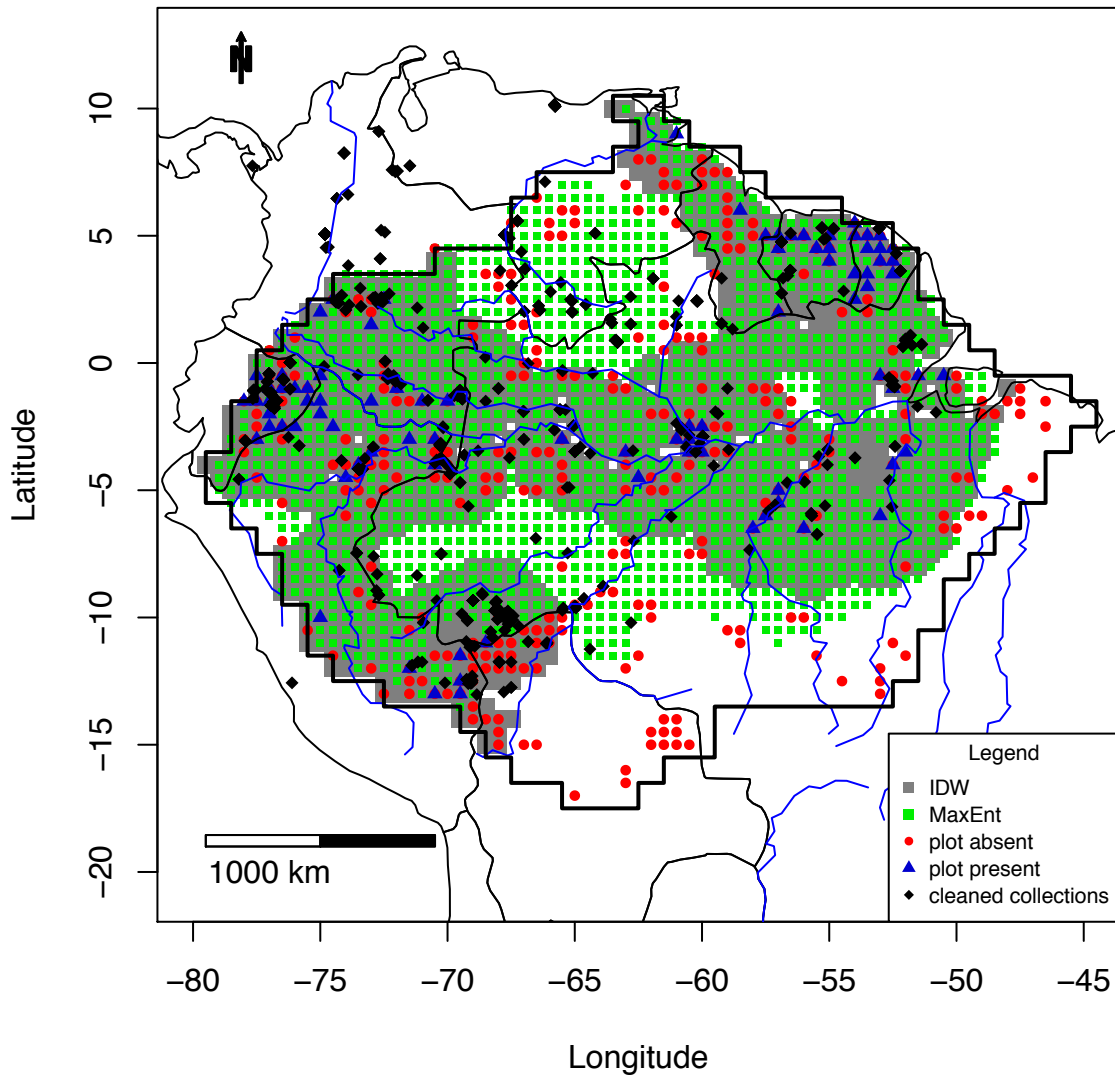

Figure S3\_66B MaxEnt map of *Gustavia\_hexapetala*

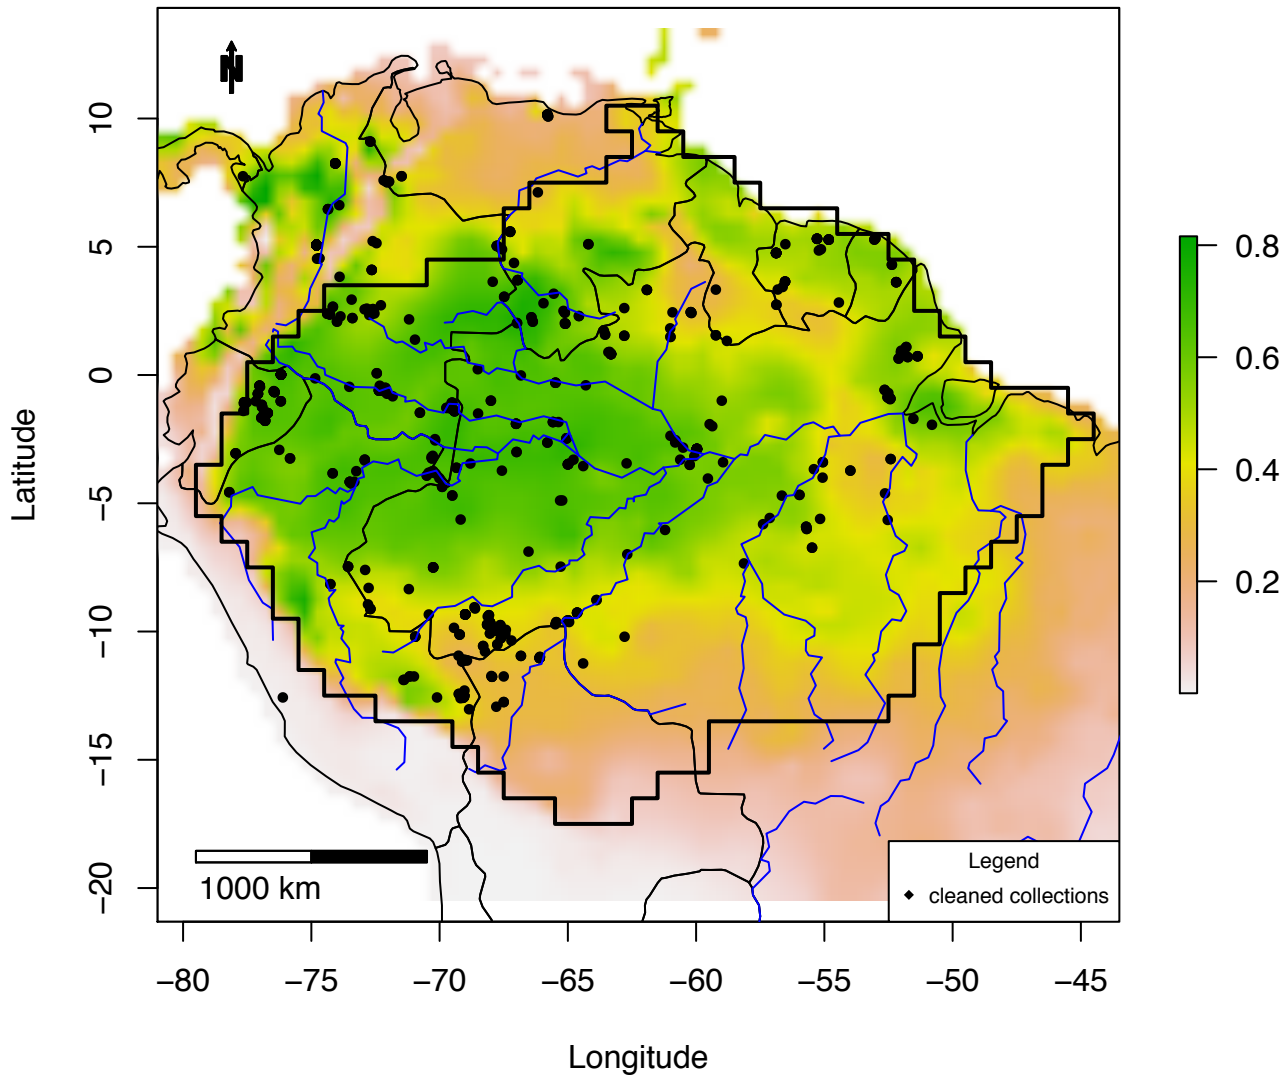

Figure S3\_66C IDW map of *Gustavia hexapetala*:  
plots =0 – 0.2; IDW: 0 – 0.08

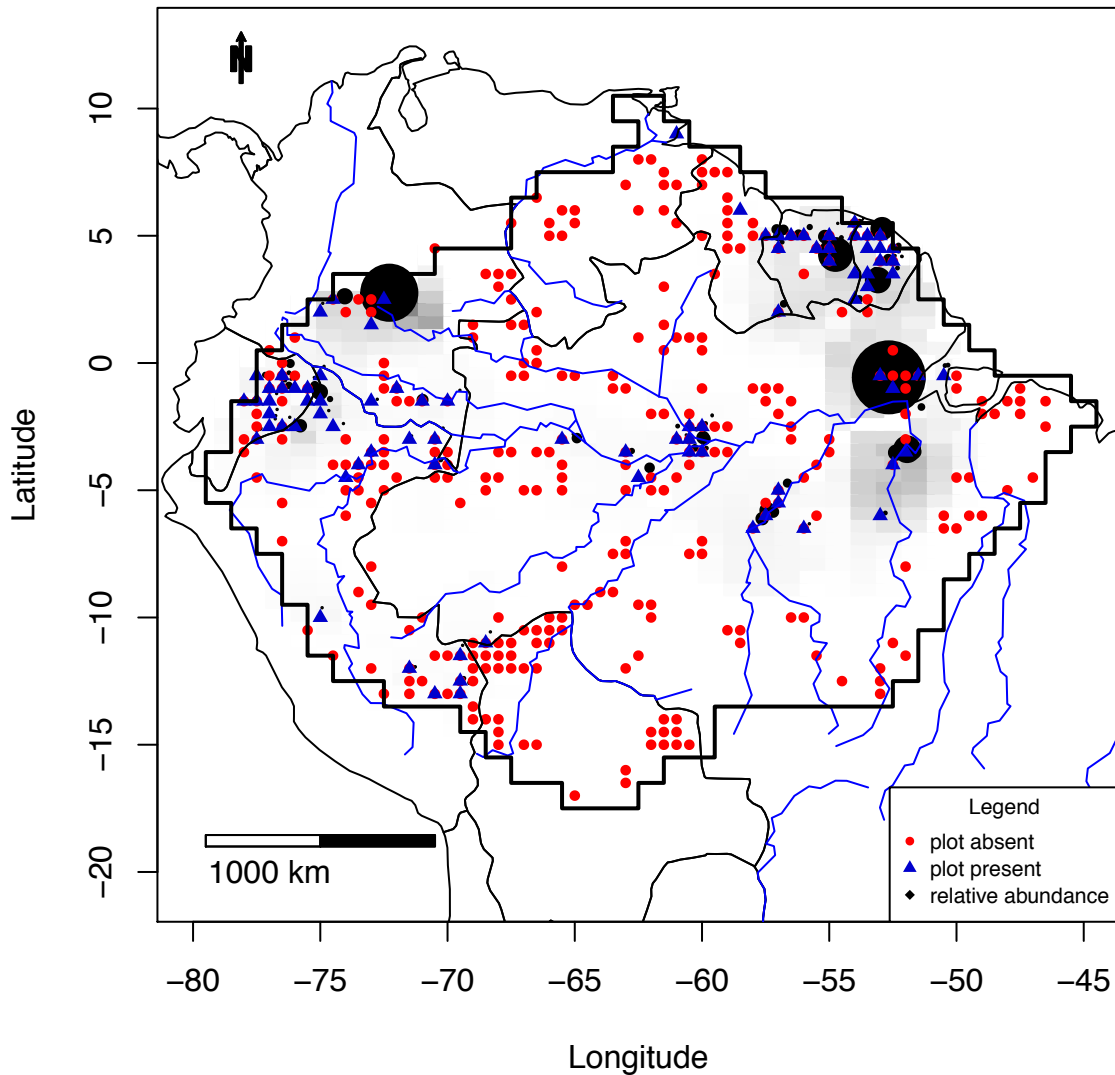

Figure S3\_67A Combined map of *Handroanthus barbatus*

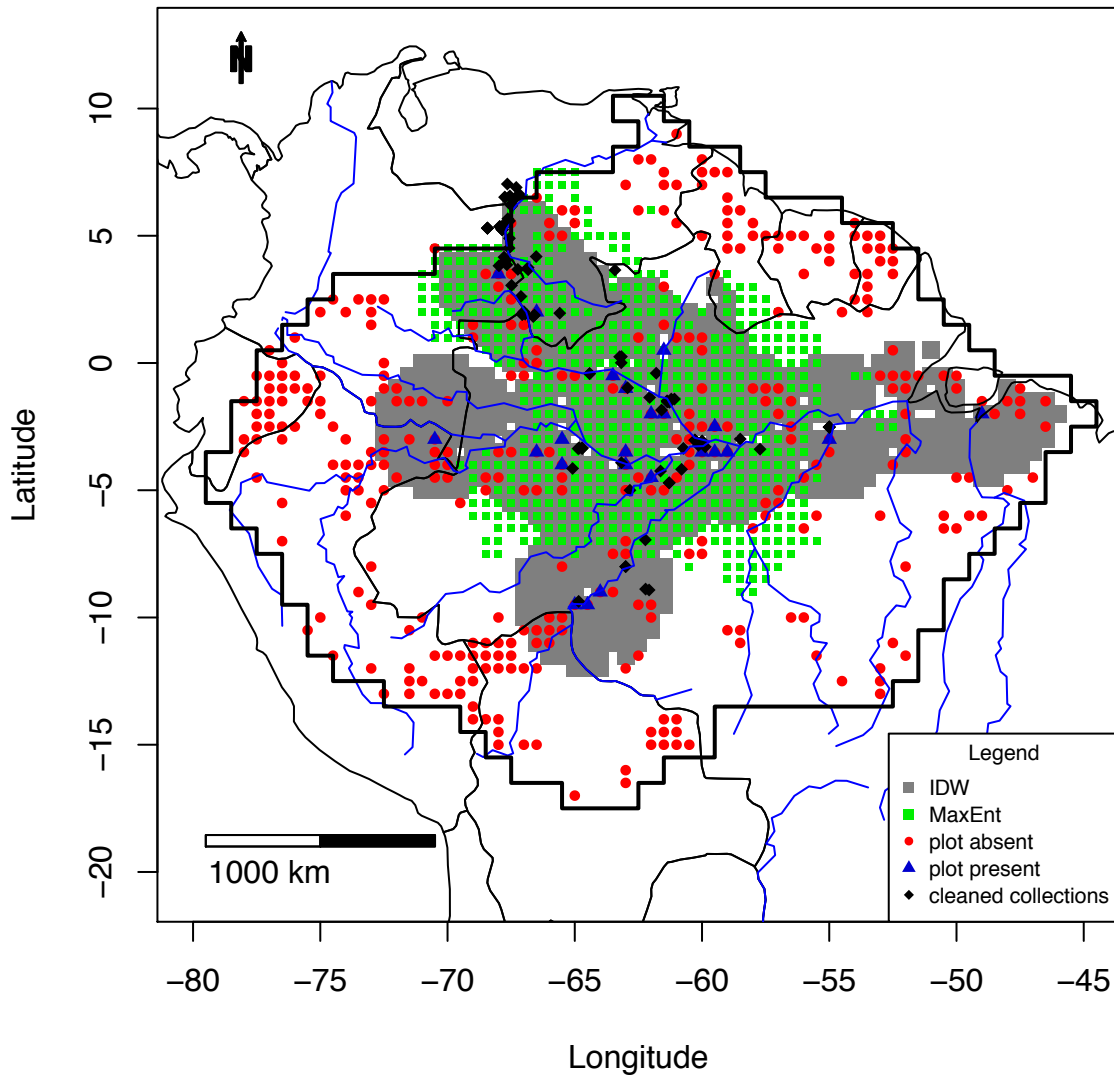



Figure S3\_67B MaxEnt map of *Handroanthus barbatus*

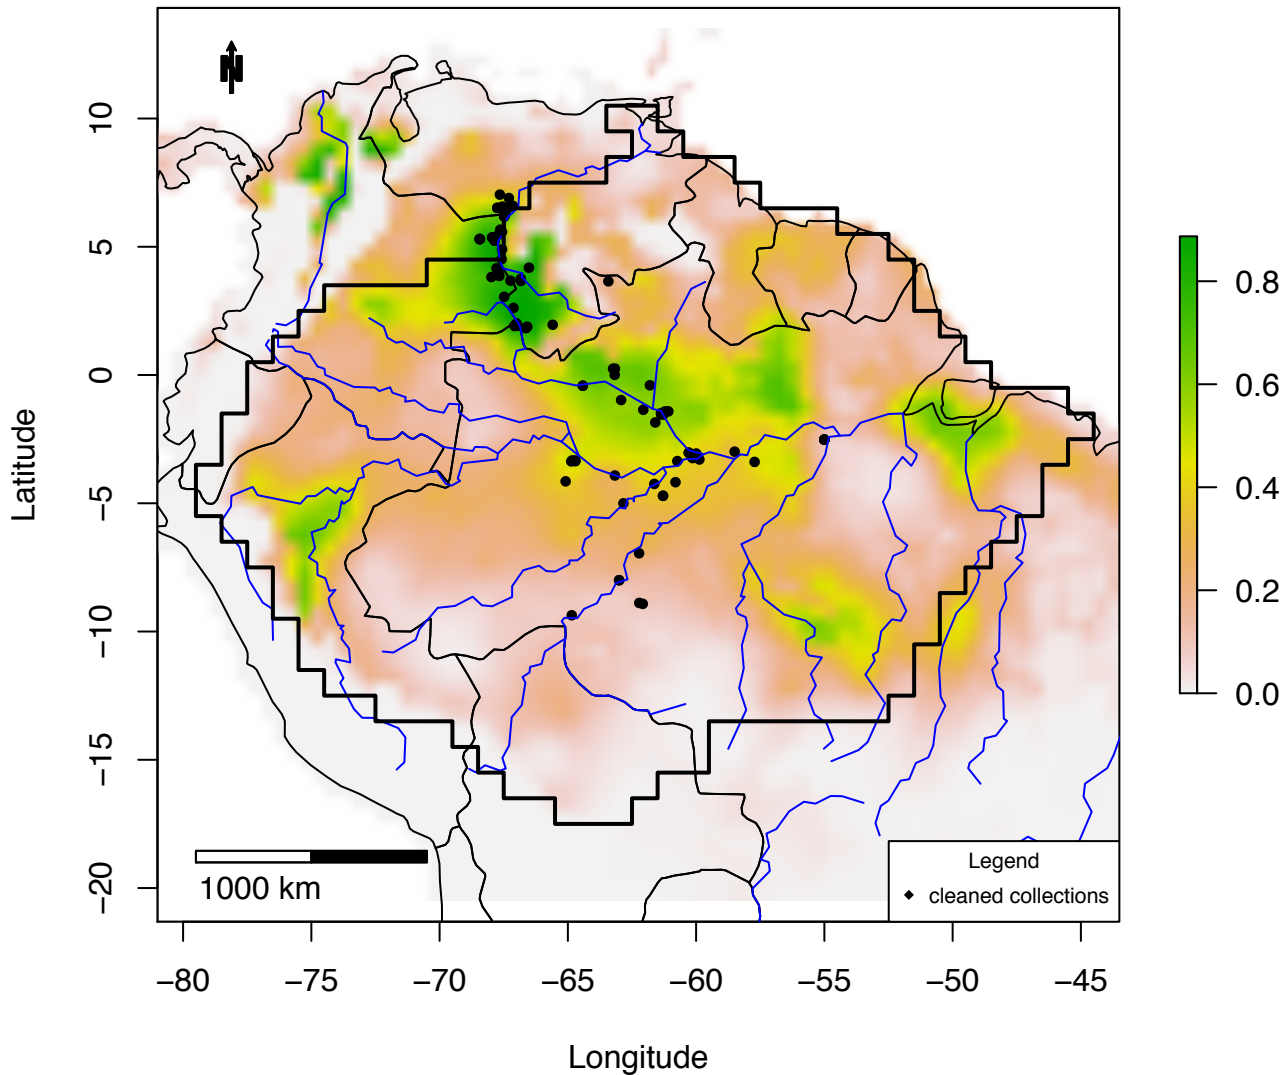

**Figure S3\_67C IDW map of *Handroanthus barbatus*:  
plots =0 – 0.3; IDW: 0 – 0.06**

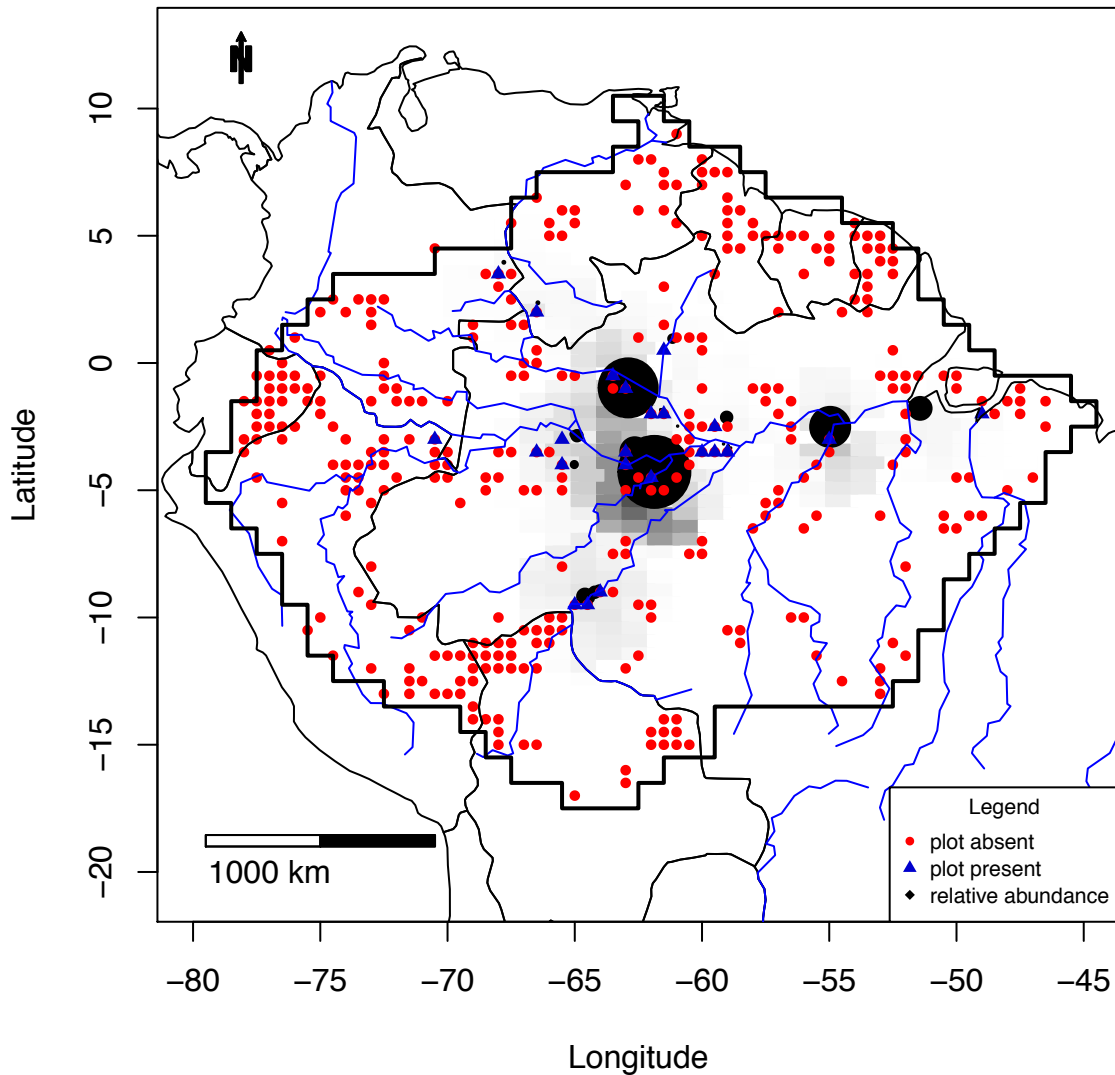

Figure S3\_68A Combined map of *Haploclathra\_cordata*

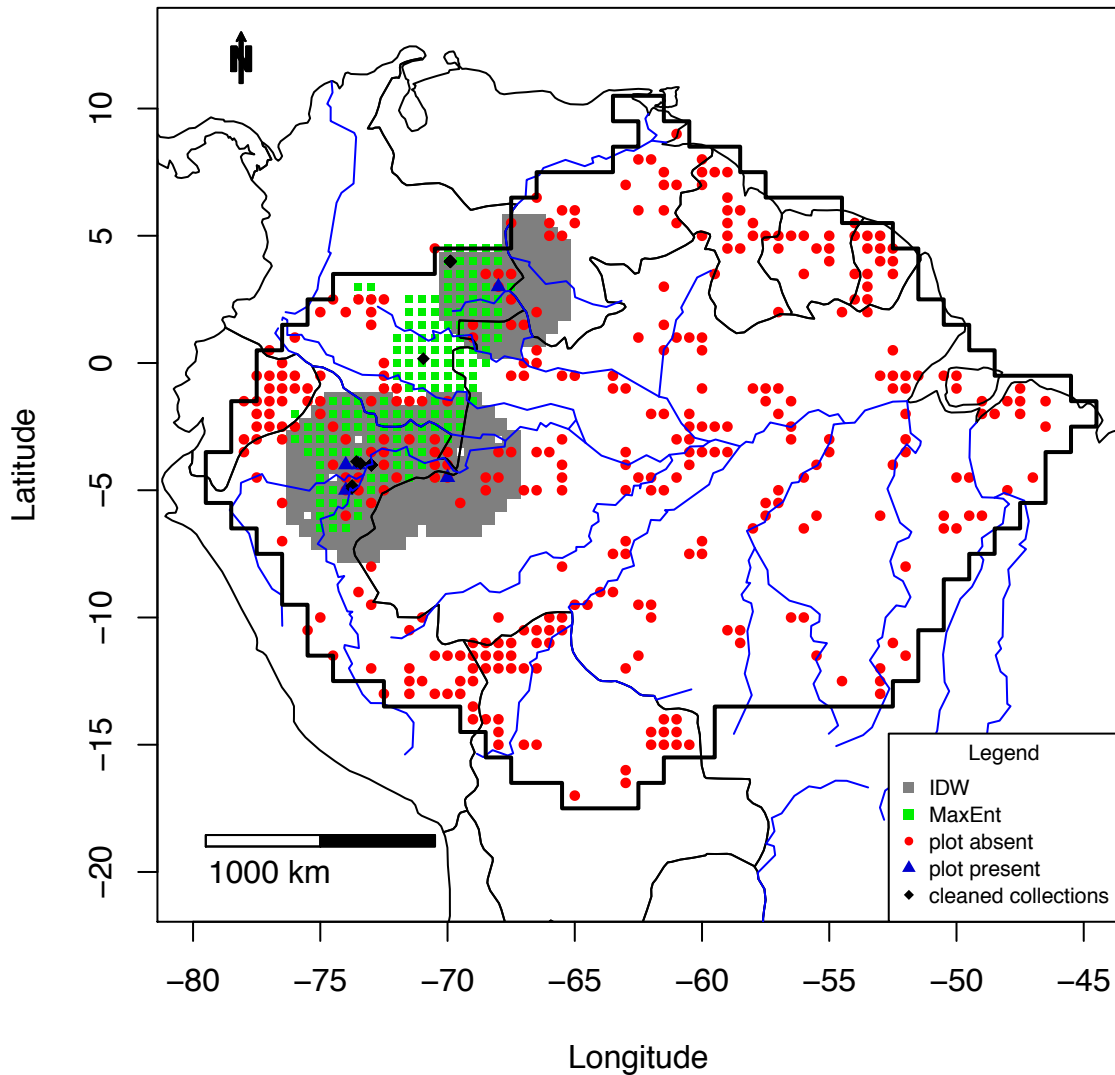

Figure S3\_68B MaxEnt map of *Haploclathra\_cordata*

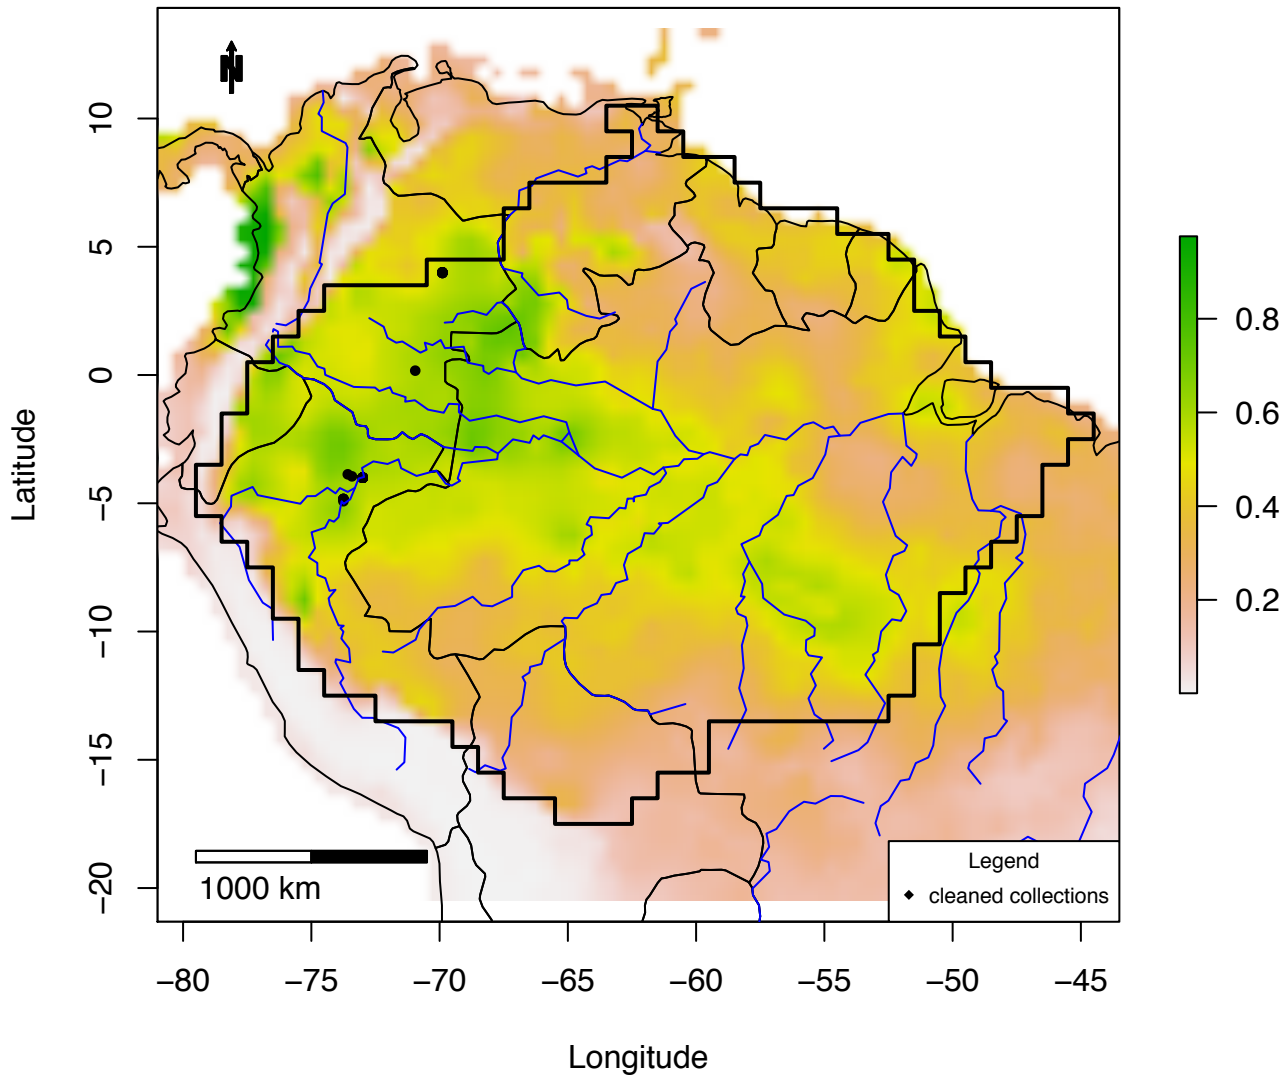

Figure S3\_68C IDW map of *Haploclathra\_cordata*:  
plots =0 – 0.42; IDW: 0 – 0.24

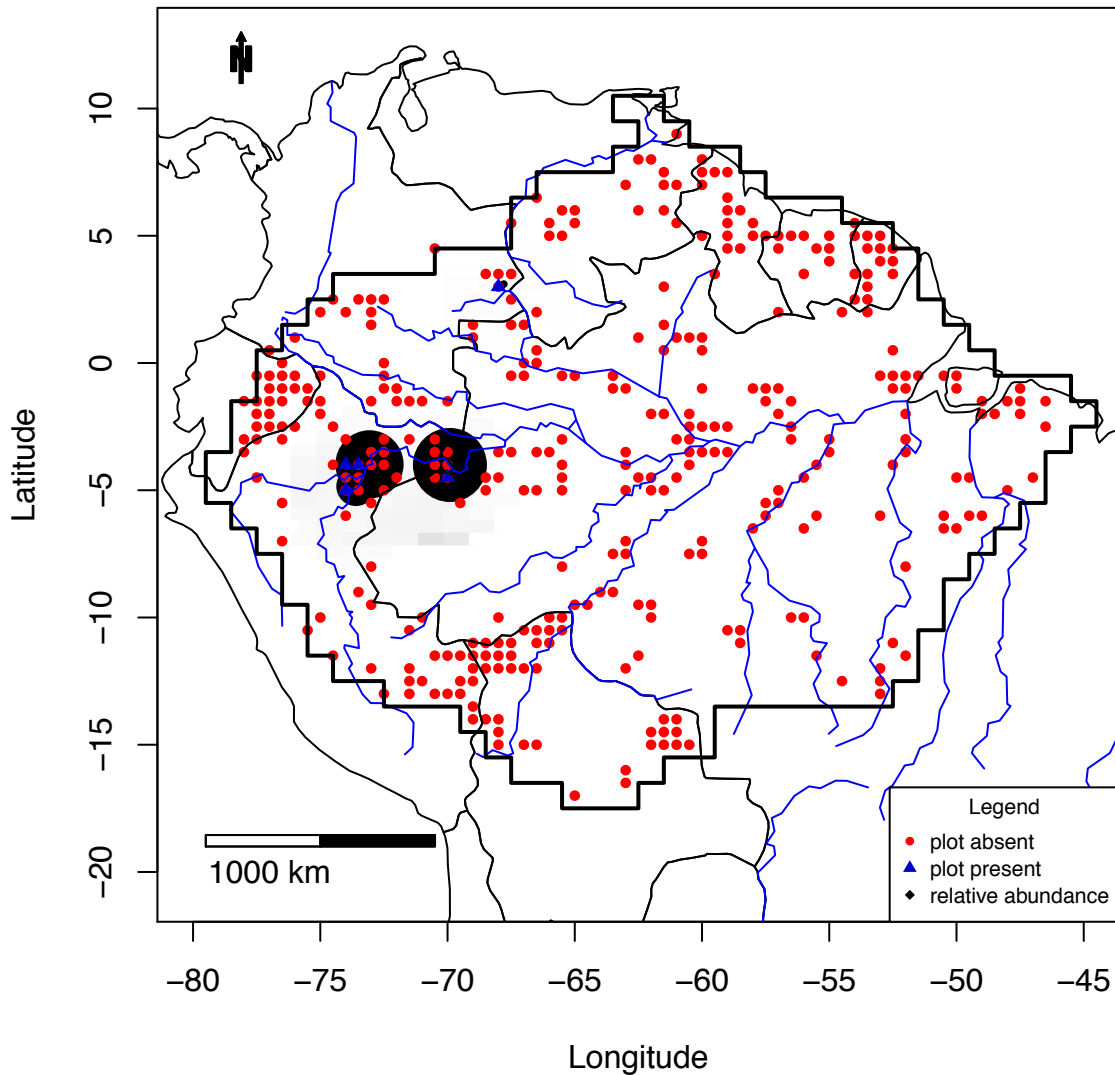

Figure S3\_69A Combined map of *Hevea guianensis*

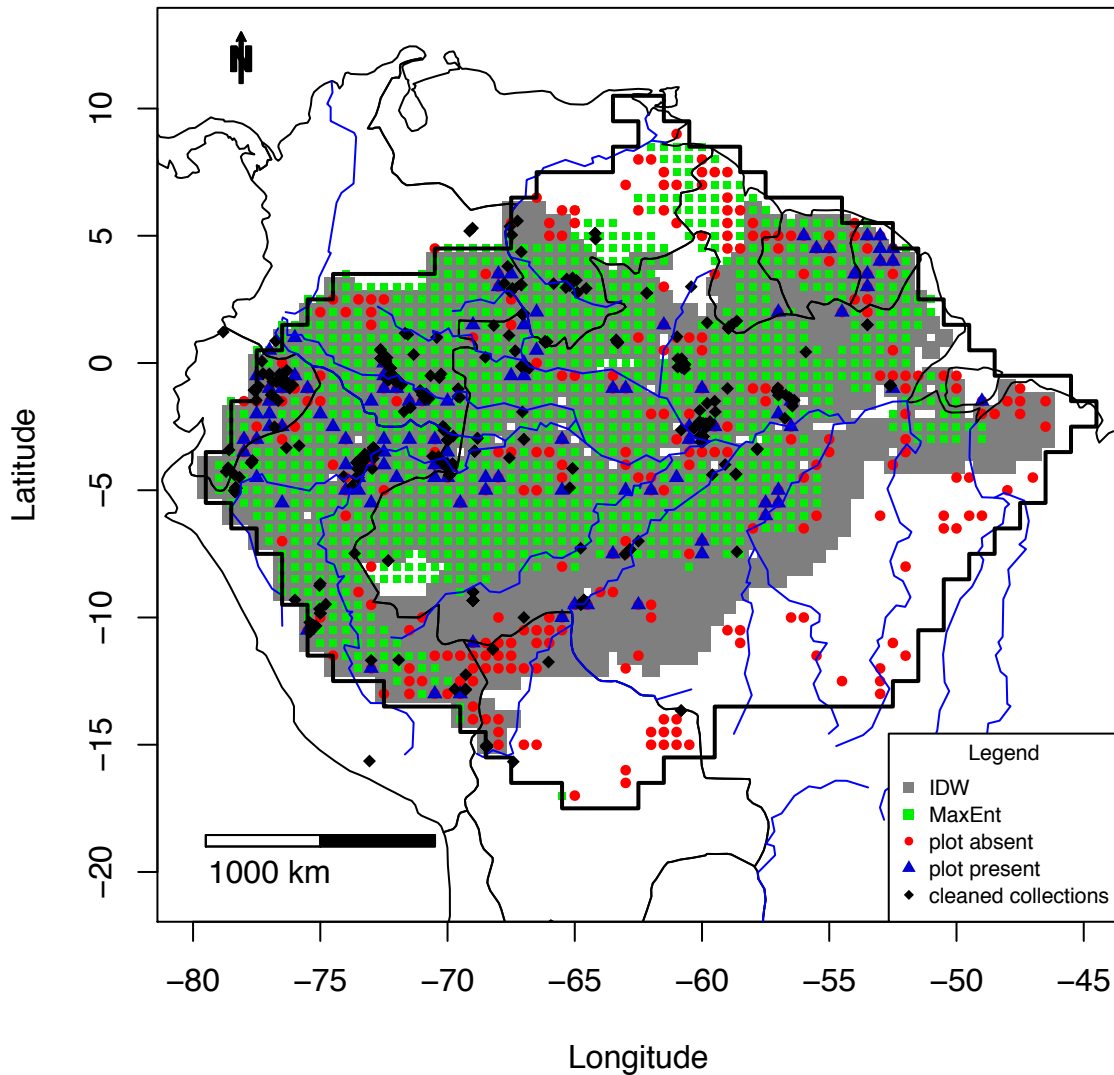

Figure S3\_69B MaxEnt map of *Hevea guianensis*

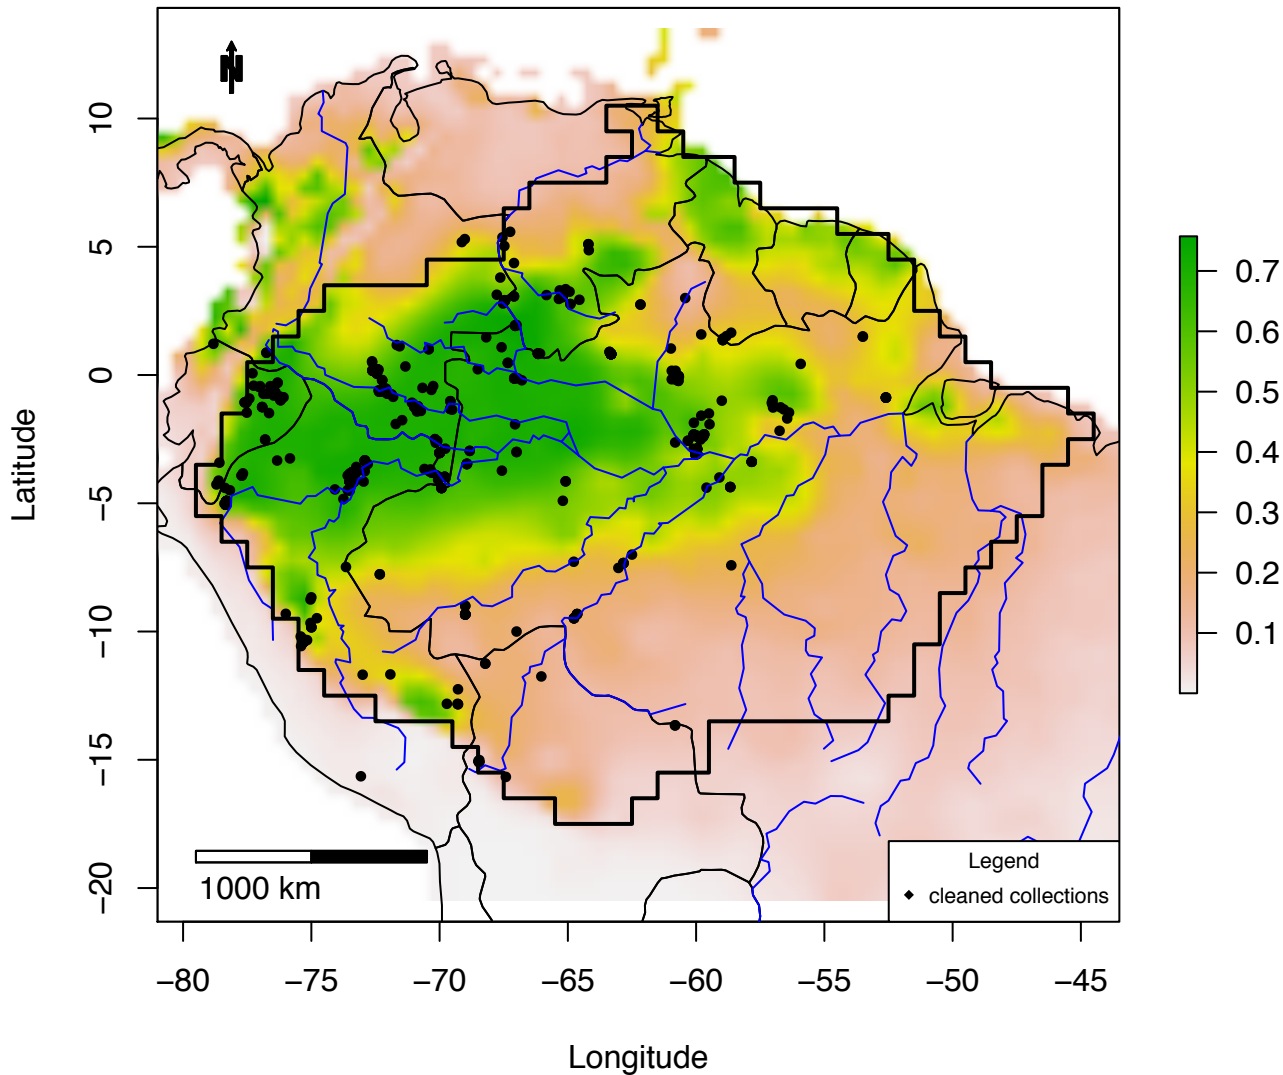

Figure S3\_69C IDW map of *Hevea guianensis*:  
plots = 0 – 0.08; IDW: 0 – 0.05

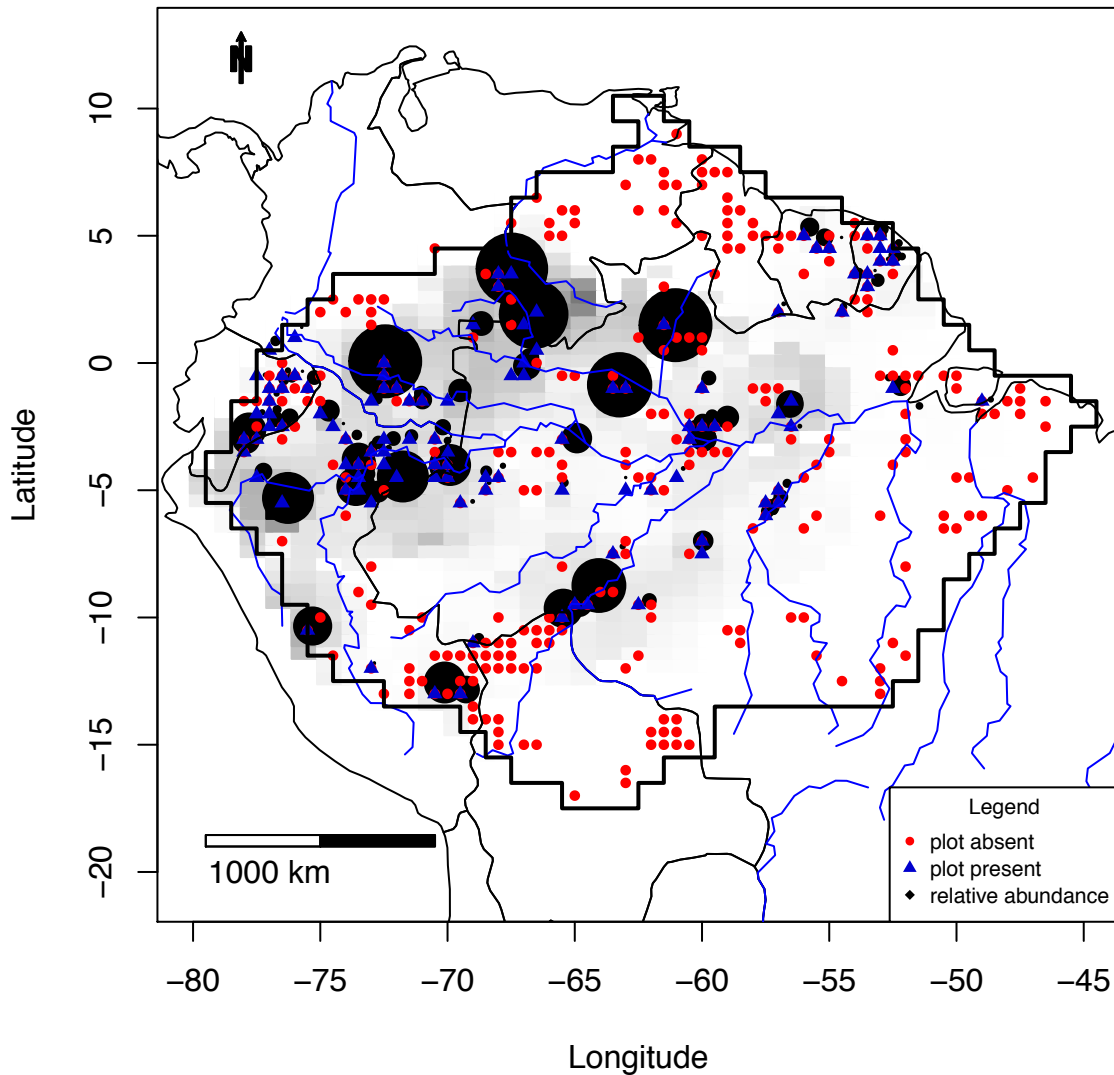



Figure S3\_70A Combined map of *Inga\_lateriflora*

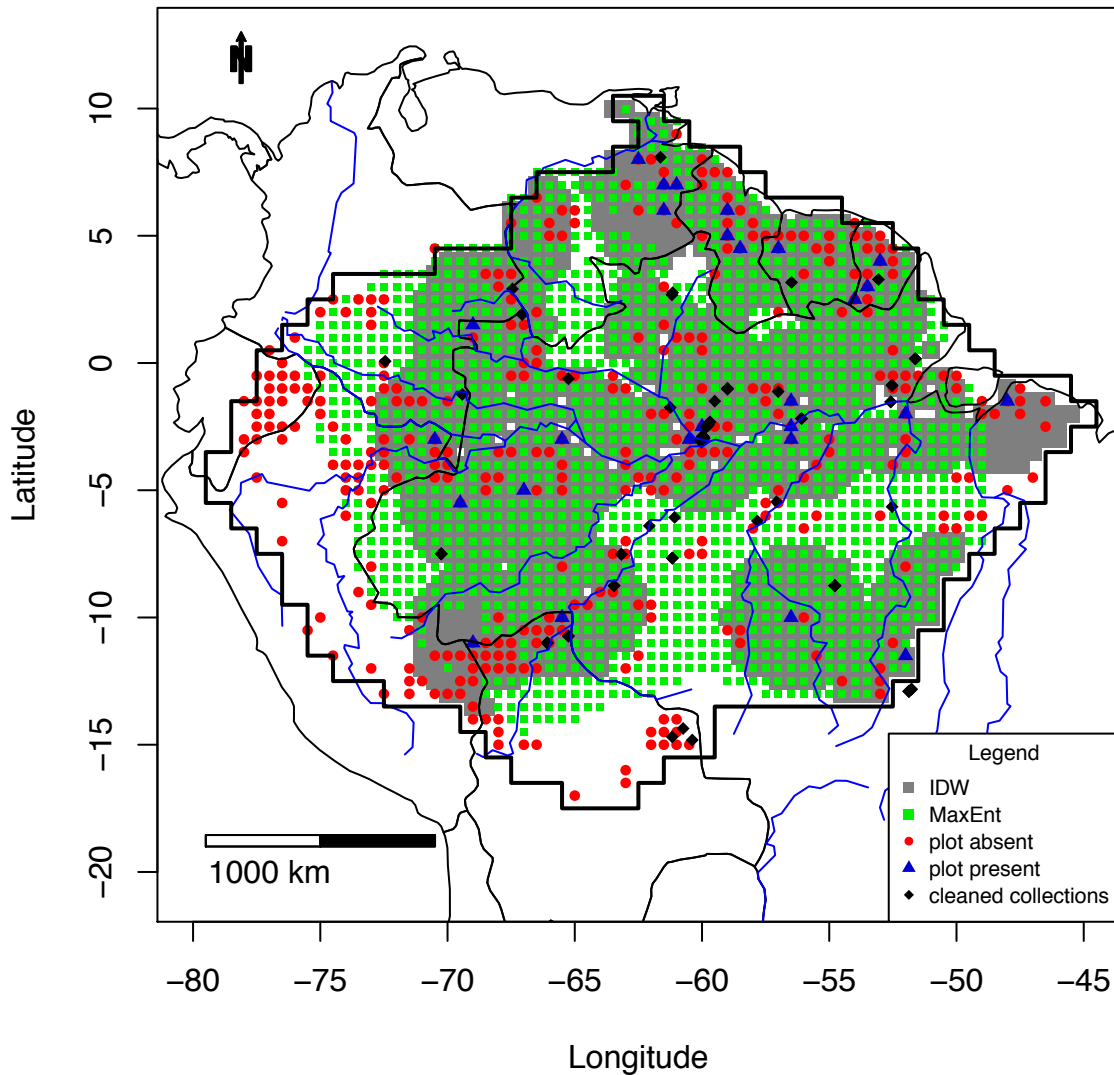

Figure S3\_70B MaxEnt map of *Inga lateriflora*

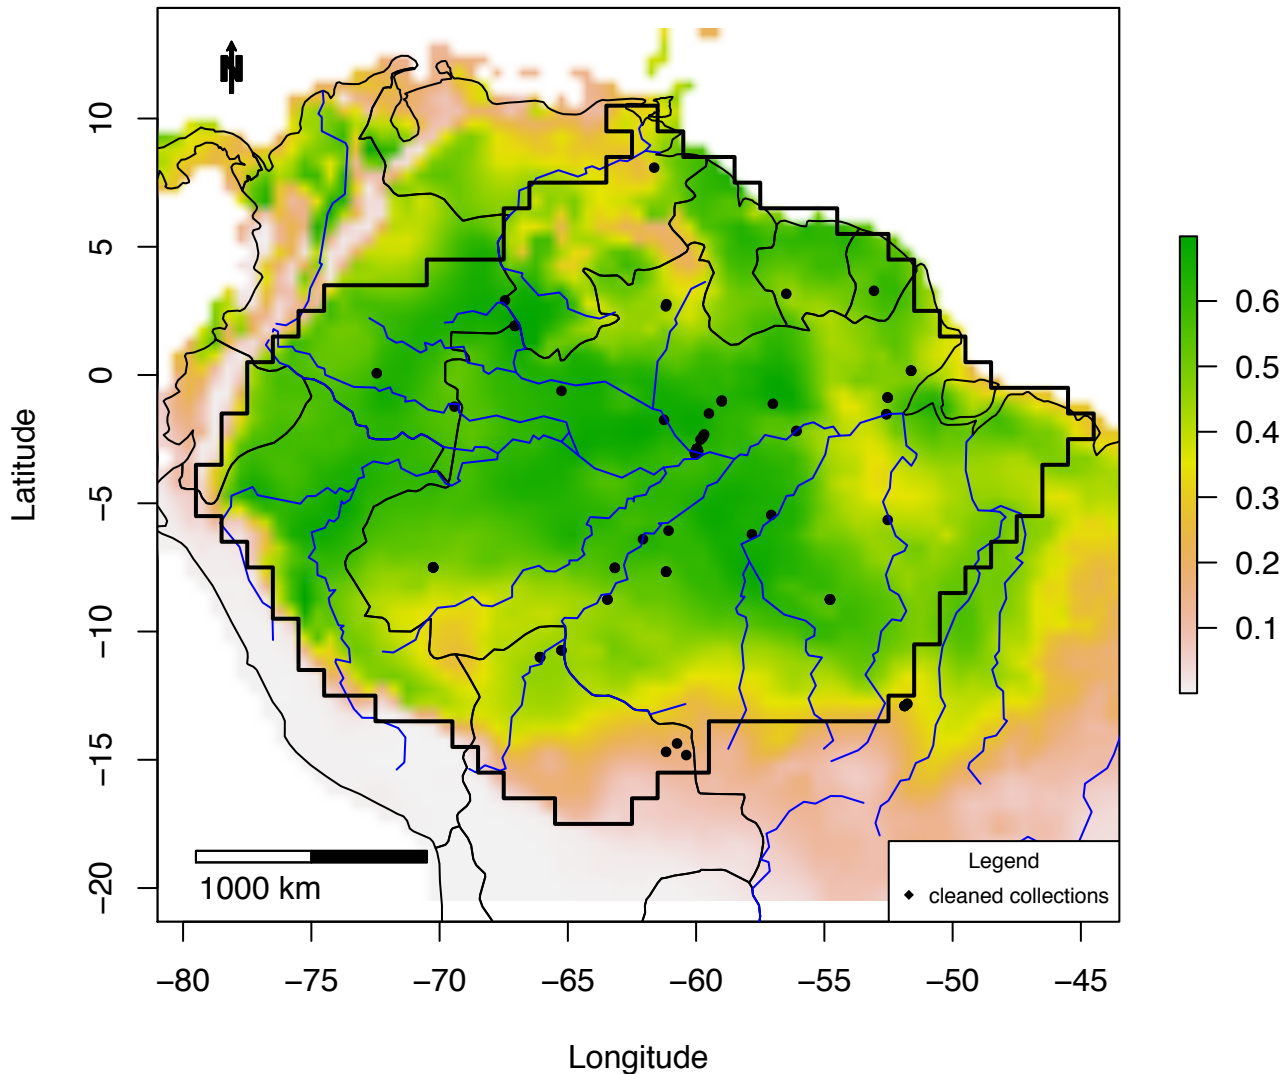

Figure S3\_70C IDW map of *Inga lateriflora*:  
plots = 0 – 0.12; IDW: 0 – 0.09

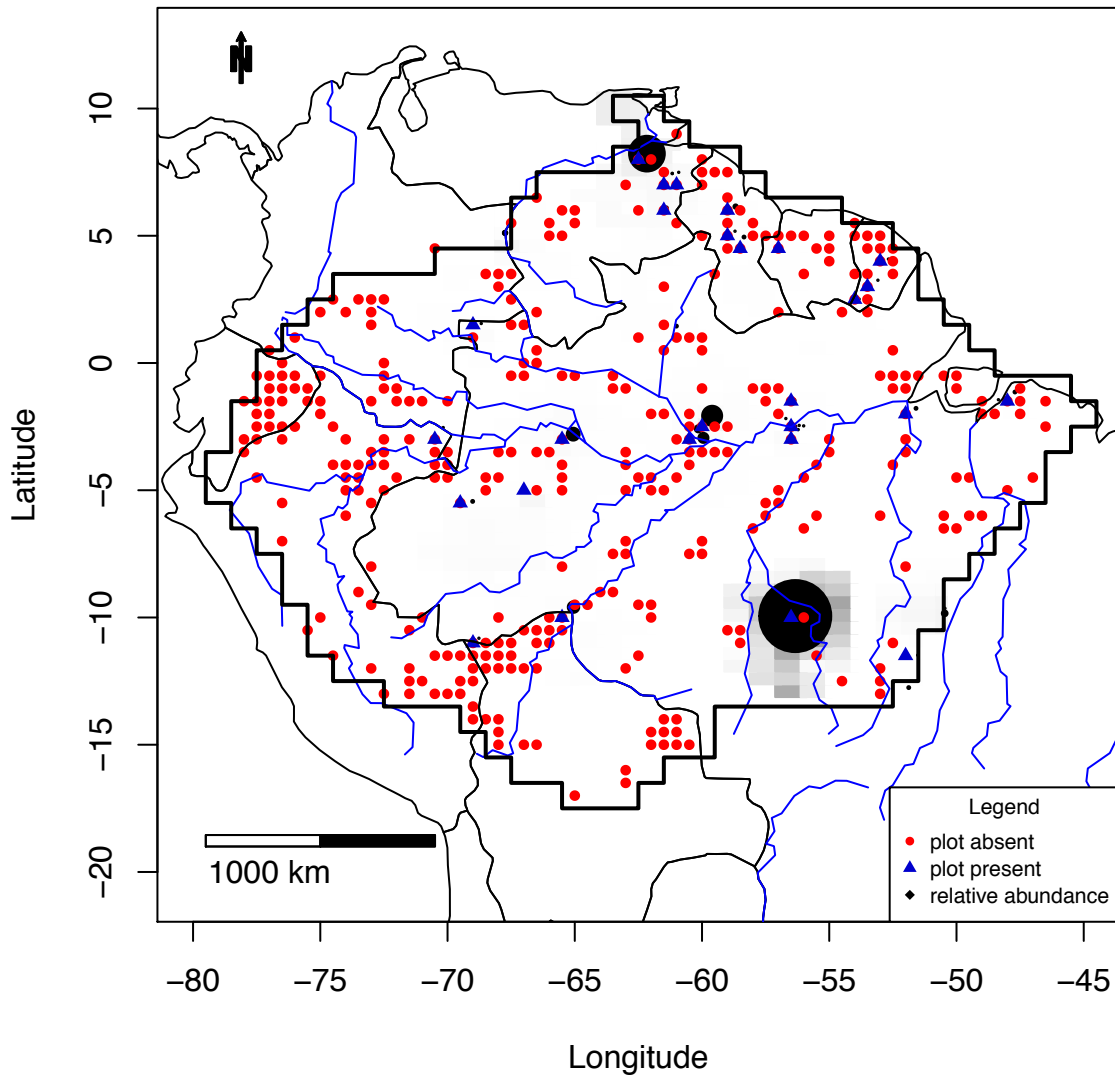

Figure S3\_71A Combined map of *Inga\_marginata*

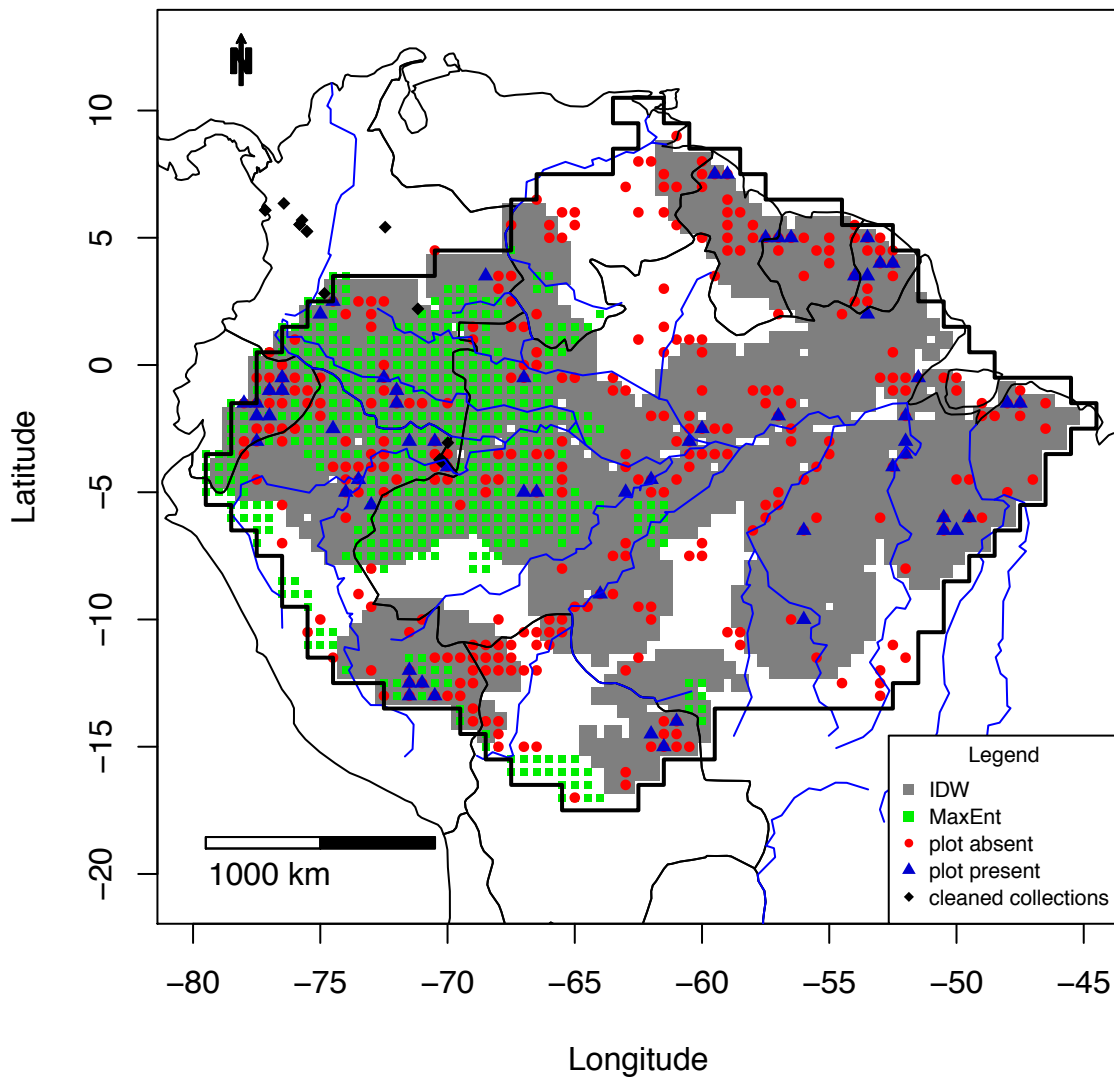

Figure S3\_71B MaxEnt map of *Inga marginata*

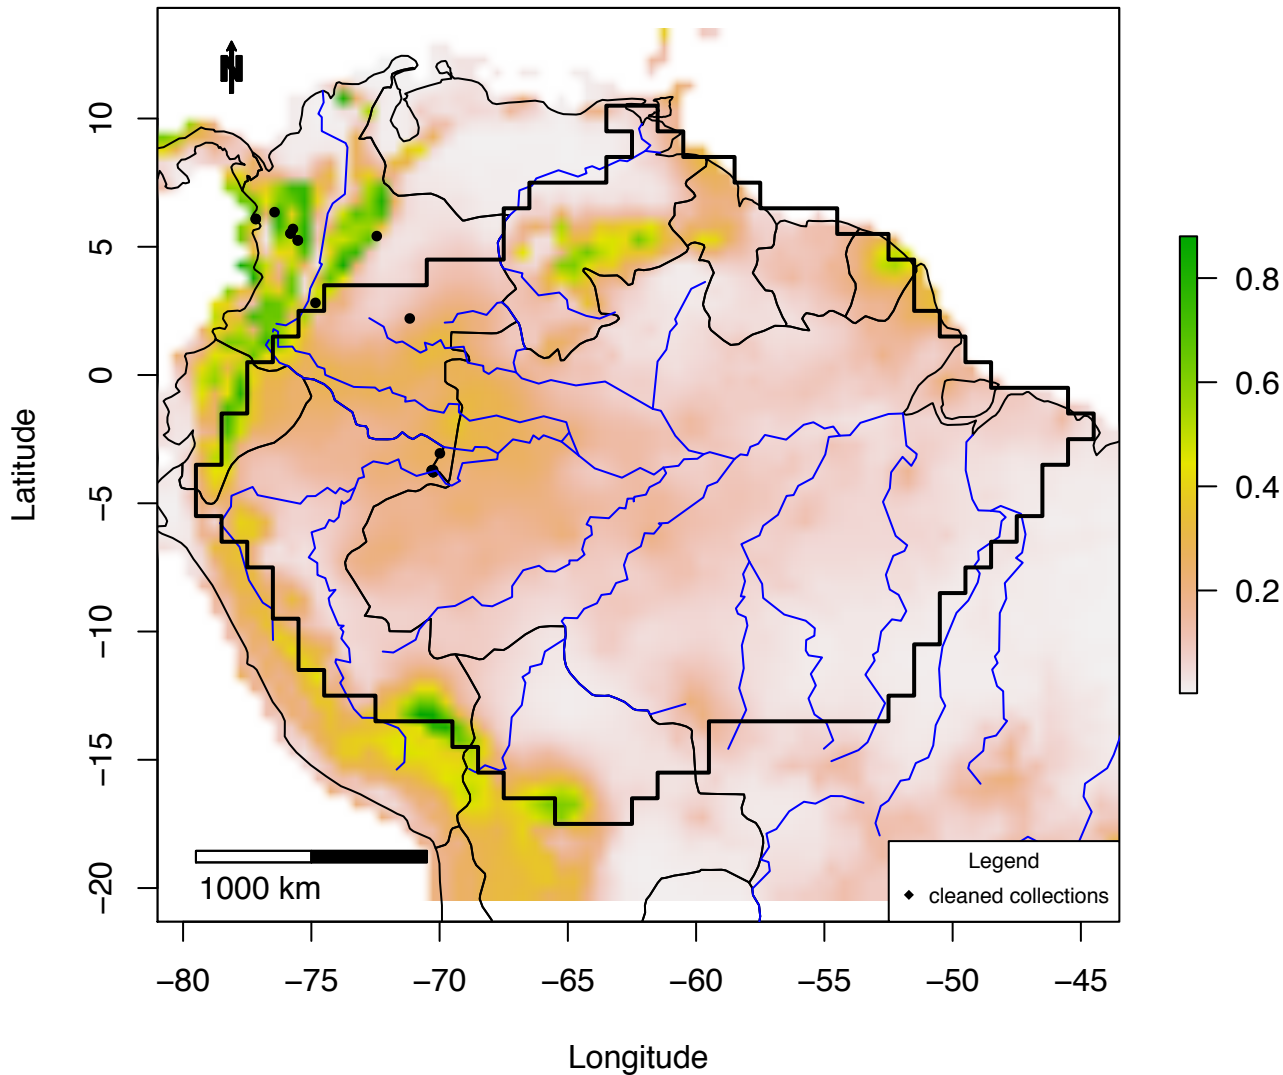

Figure S3\_71C IDW map of *Inga marginata*:  
plots =0 – 0.1; IDW: 0 – 0.02

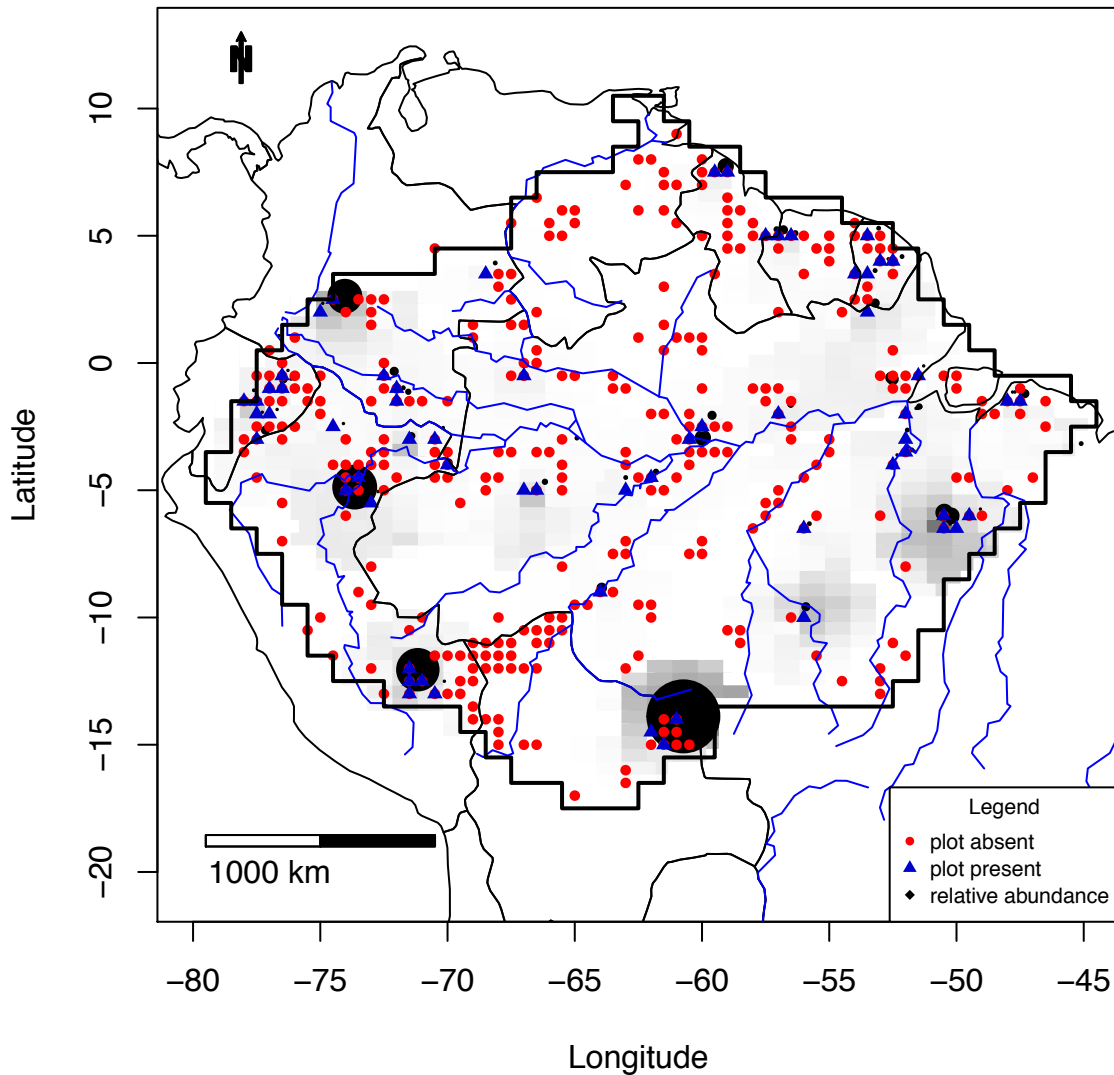

Figure S3\_72A Combined map of *Iriartea deltoidea*

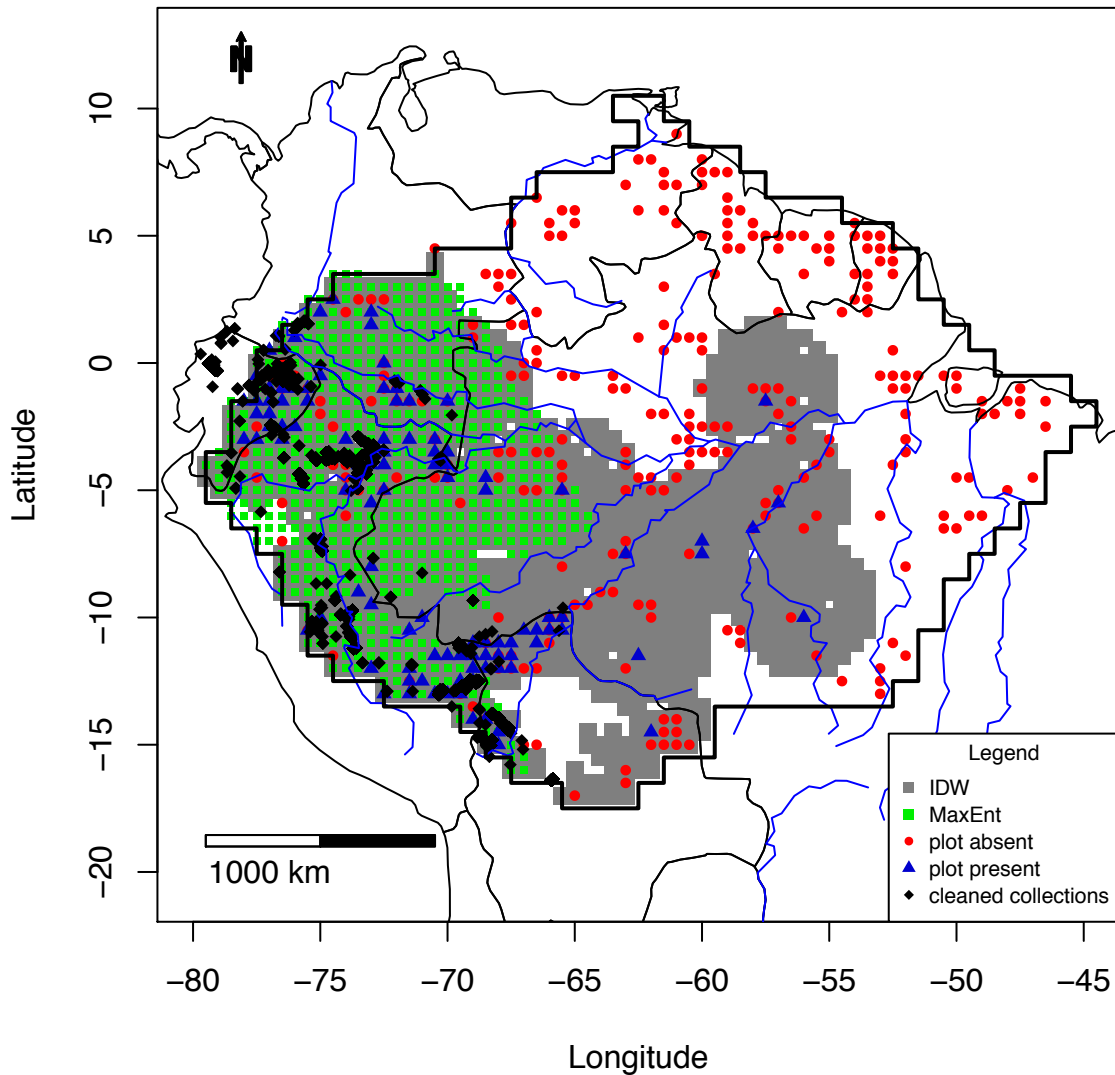

Figure S3\_72B MaxEnt map of *Iriartea deltoidea*

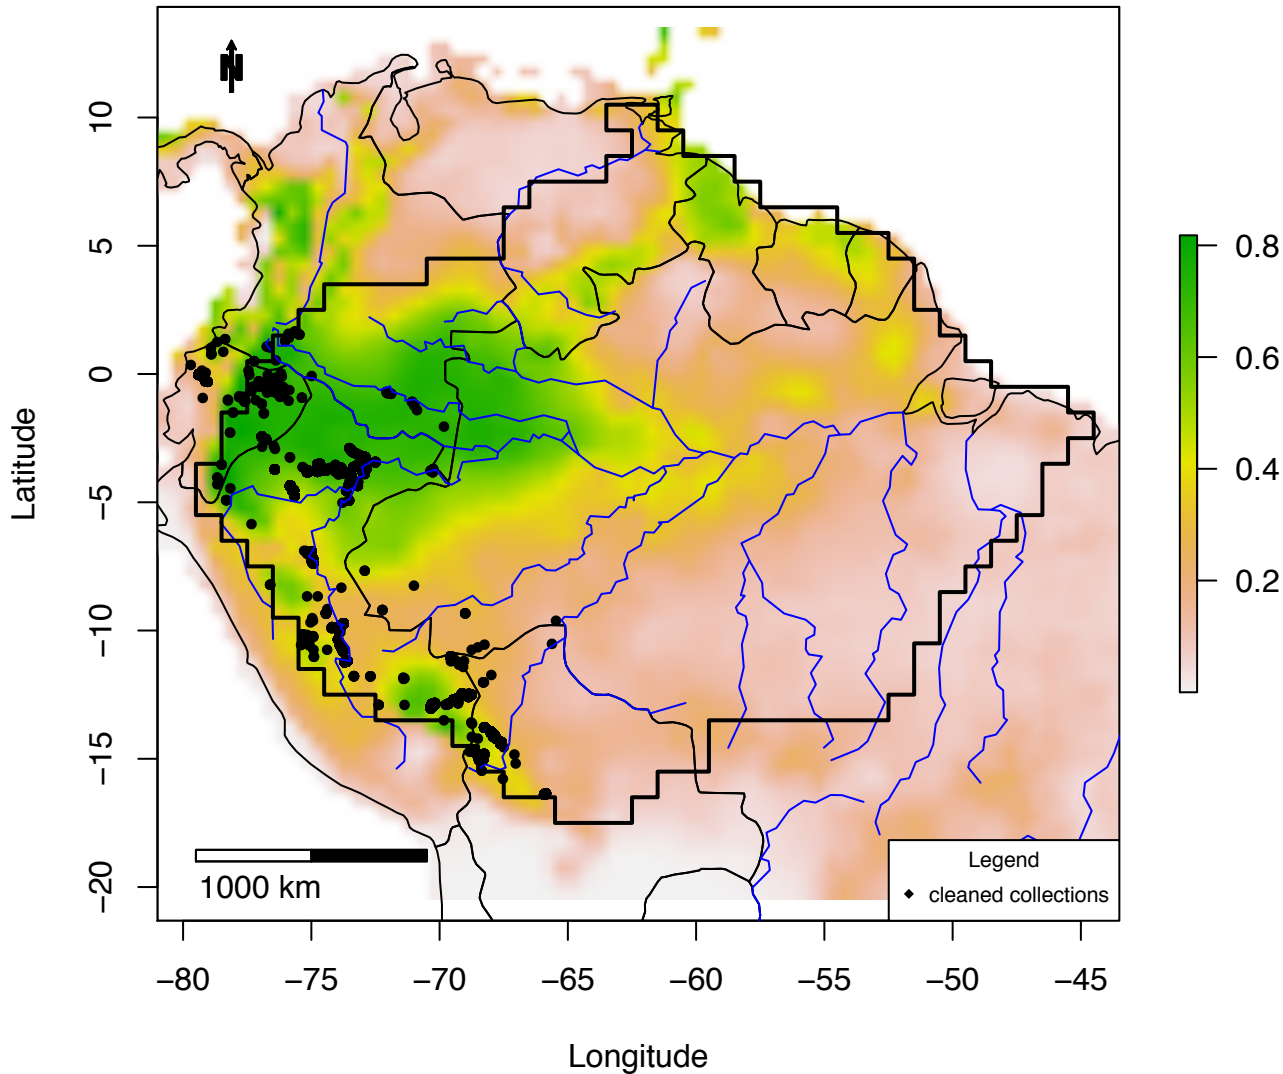



Figure S3\_72C IDW map of *Iriartea deltoidea*:  
plots =0 – 0.39; IDW: 0 – 0.27

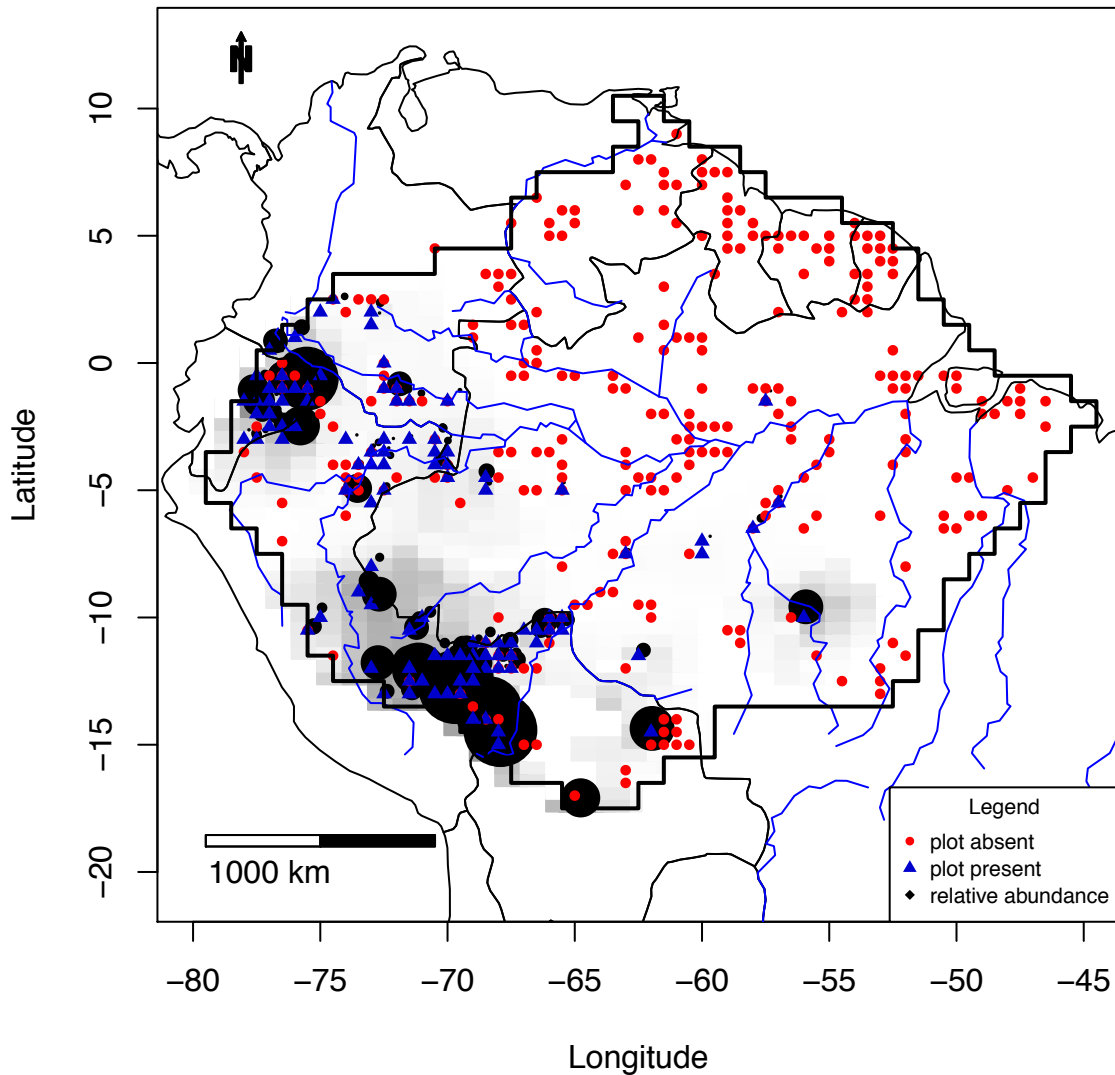

Figure S3\_73A Combined map of *Iryanthera\_juruensis*

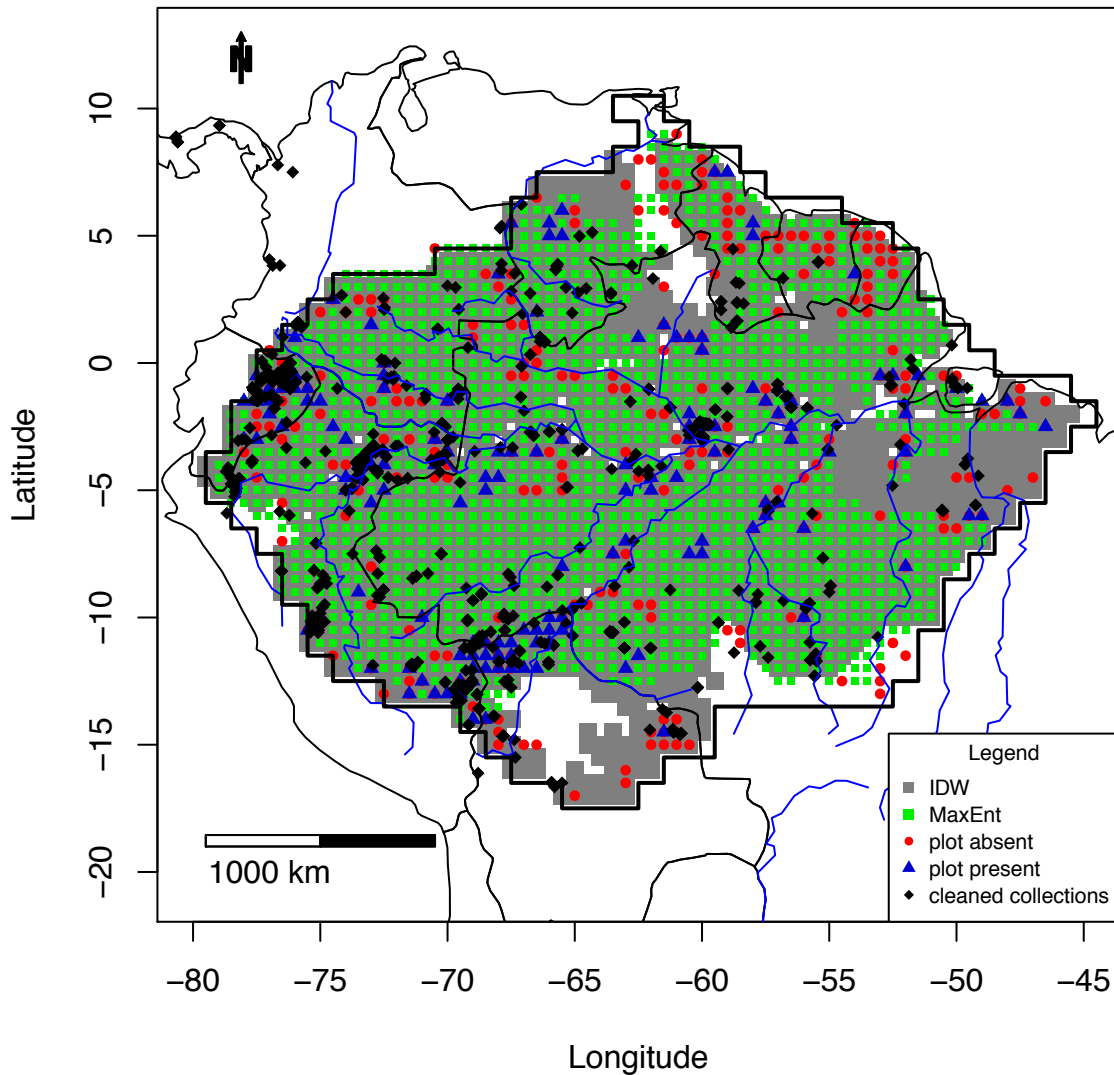

Figure S3\_73B MaxEnt map of *Iryanthera\_juruensis*

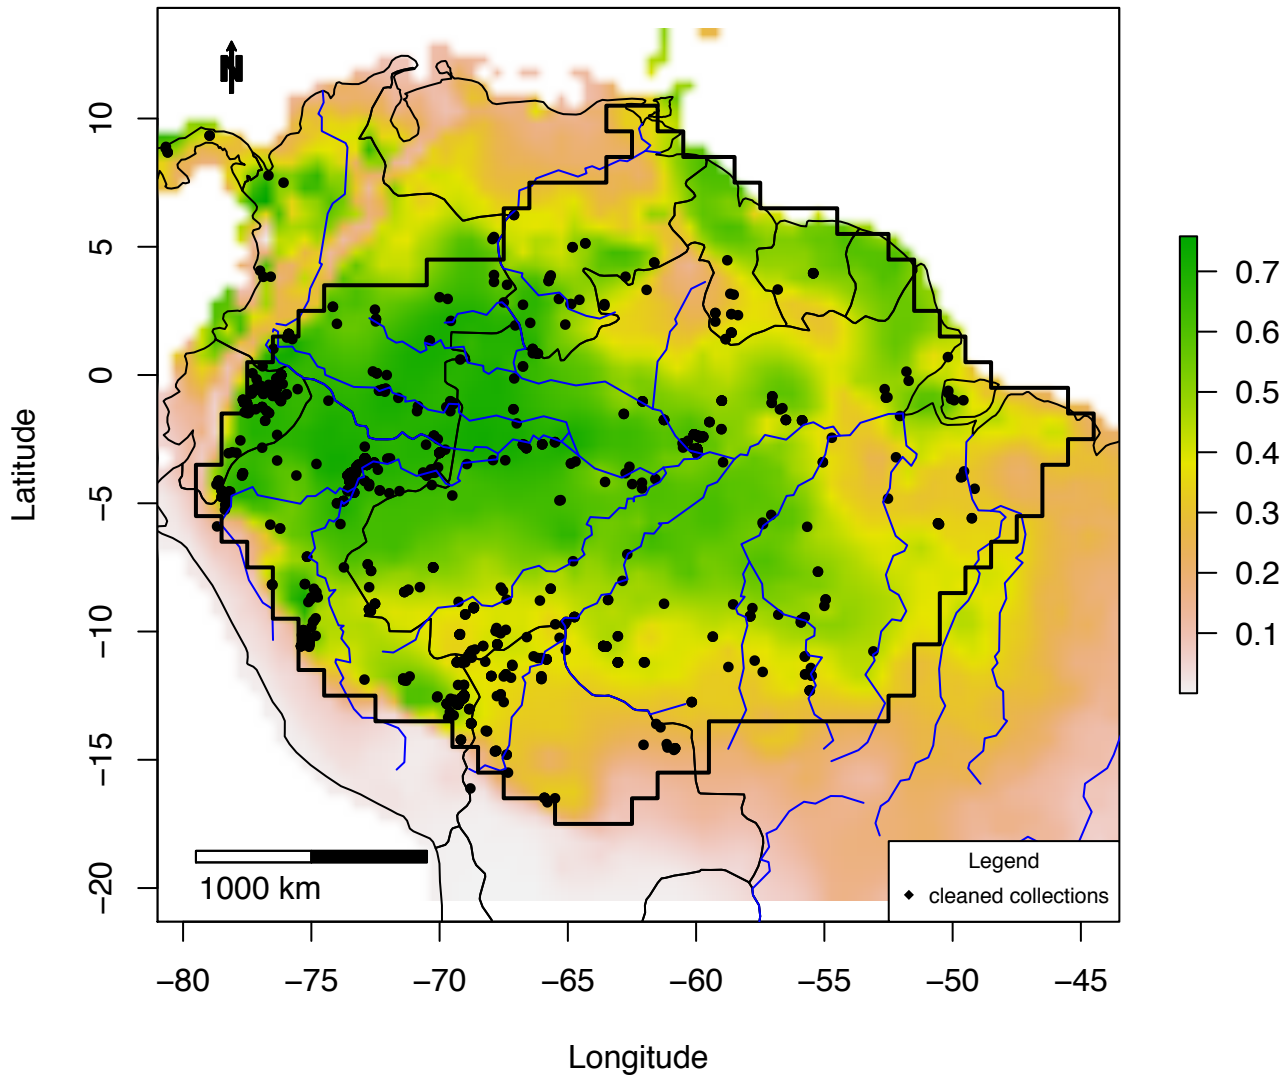

**Figure S3\_73C IDW map of *Iryanthera\_juruensis*:  
plots =0 – 0.15; IDW: 0 – 0.08**

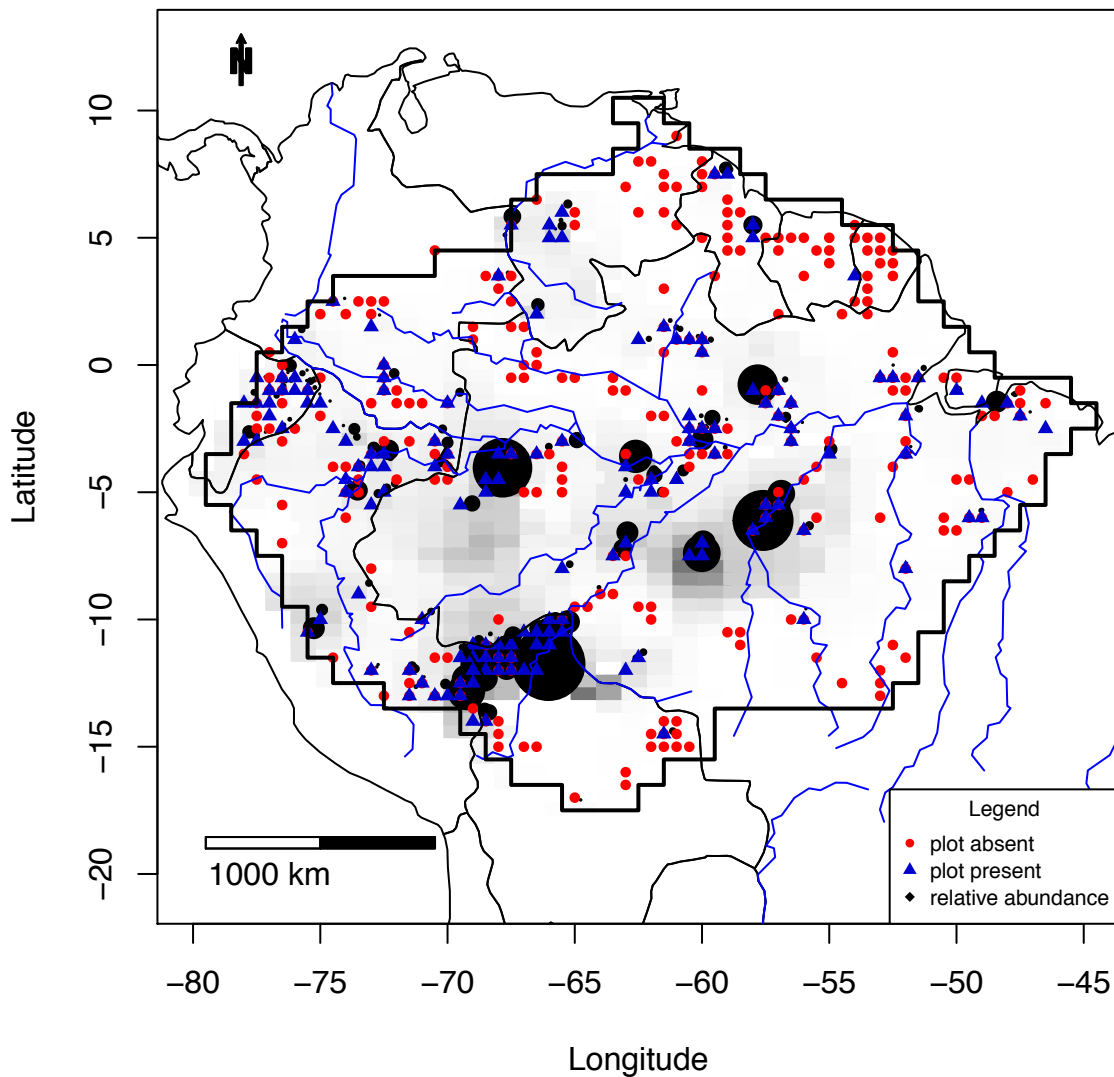

Figure S3\_74A Combined map of *Iryanthera laevis*

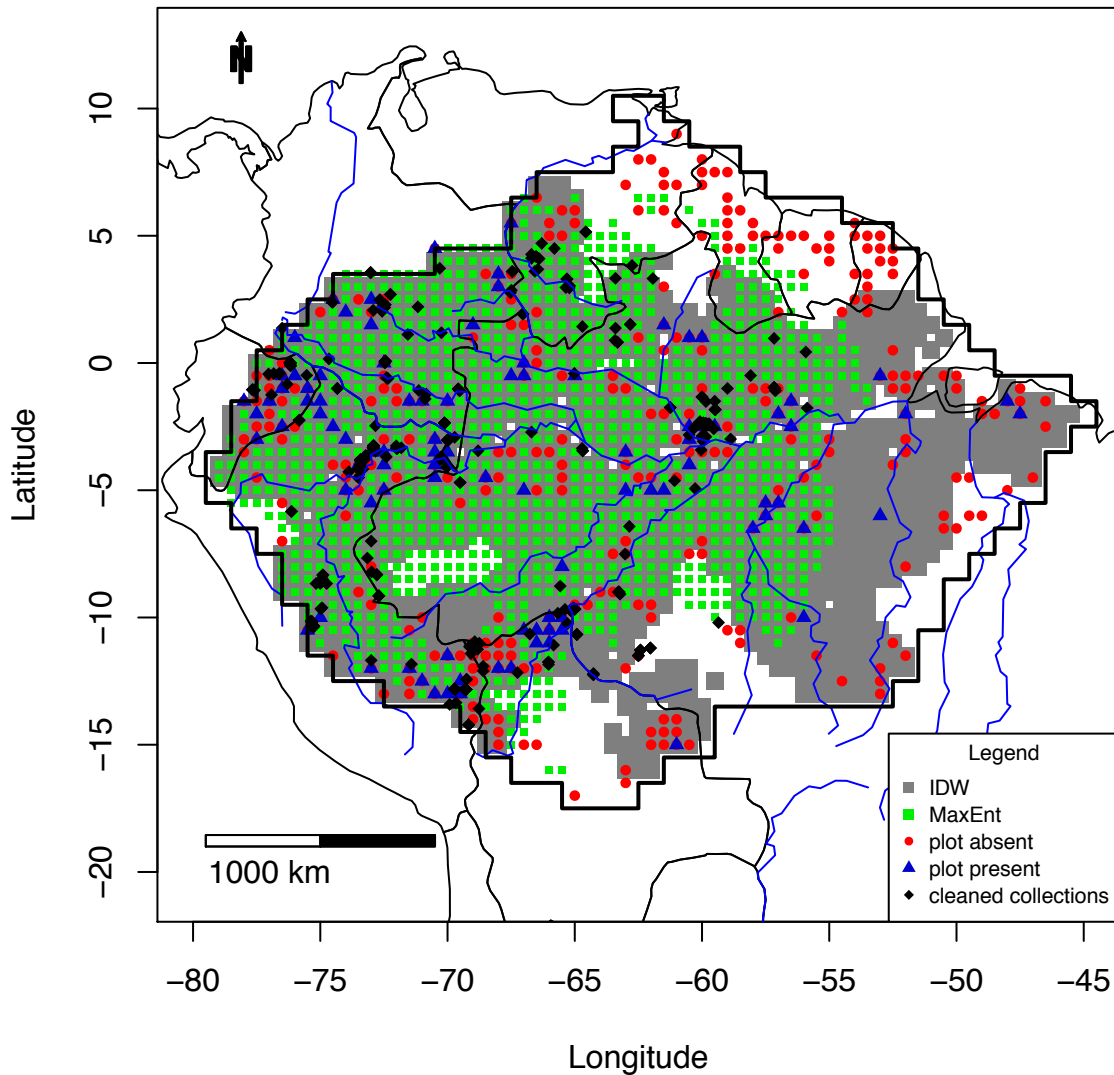

Figure S3\_74B MaxEnt map of *Iryanthera laevis*

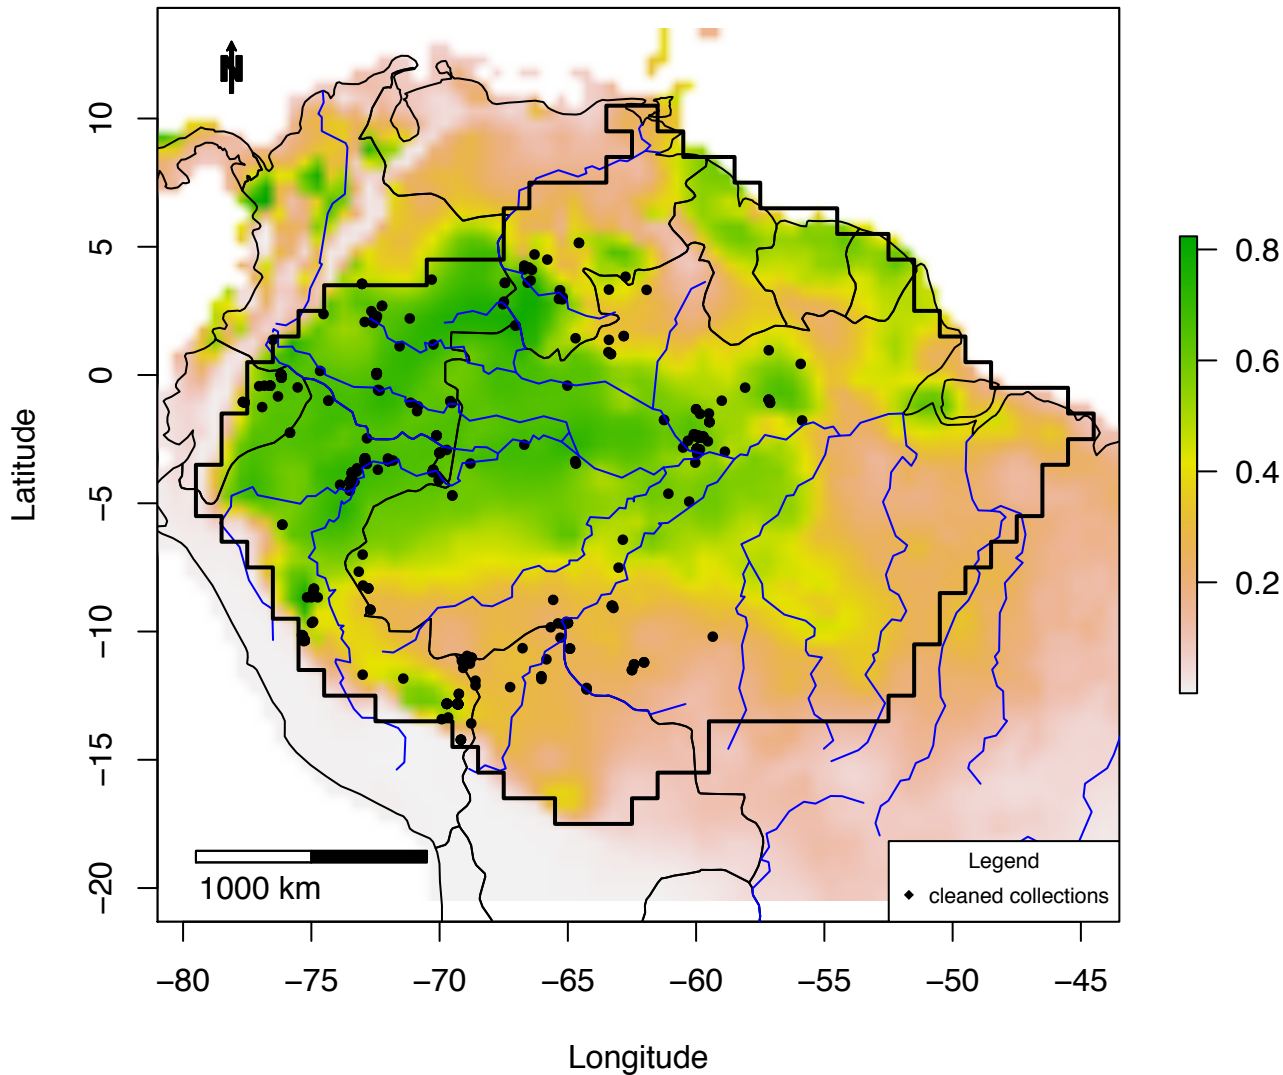

Figure S3\_74C IDW map of *Iryanthera laevis*:  
plots =0 – 0.13; IDW: 0 – 0.04

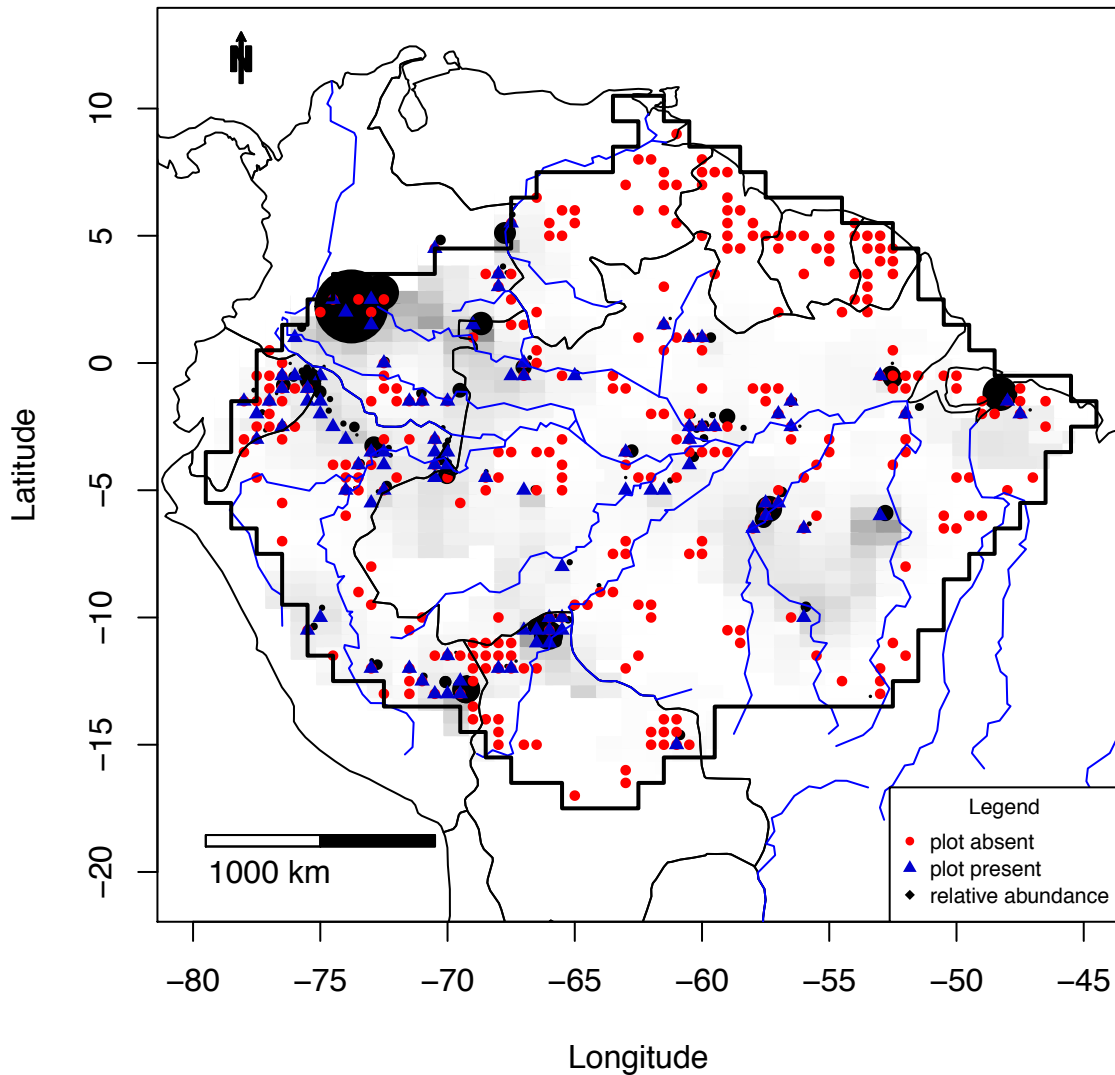

Figure S3\_75A Combined map of *Iryanthera\_ulei*

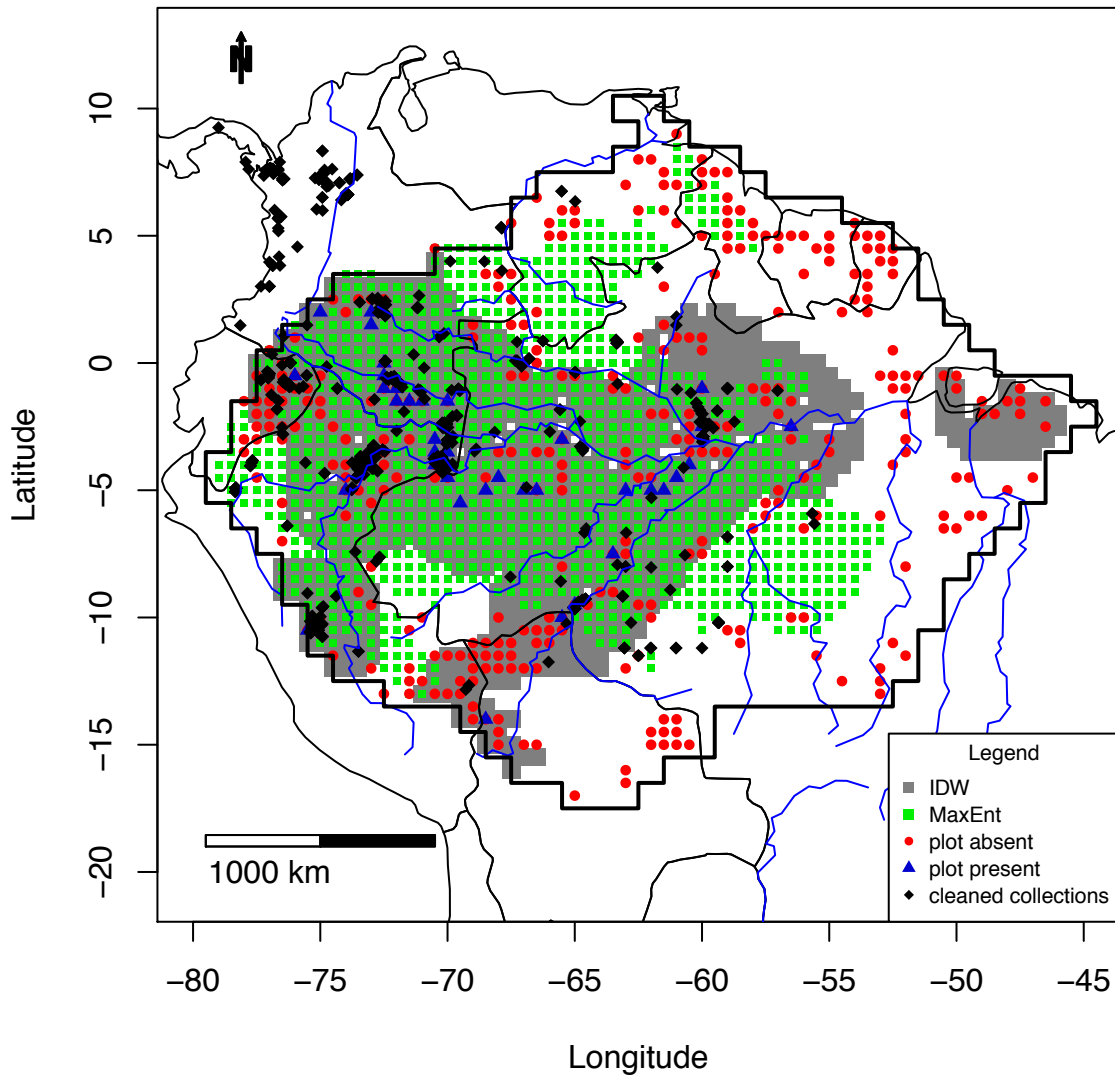



Figure S3\_75B MaxEnt map of *Iryanthera\_ulei*

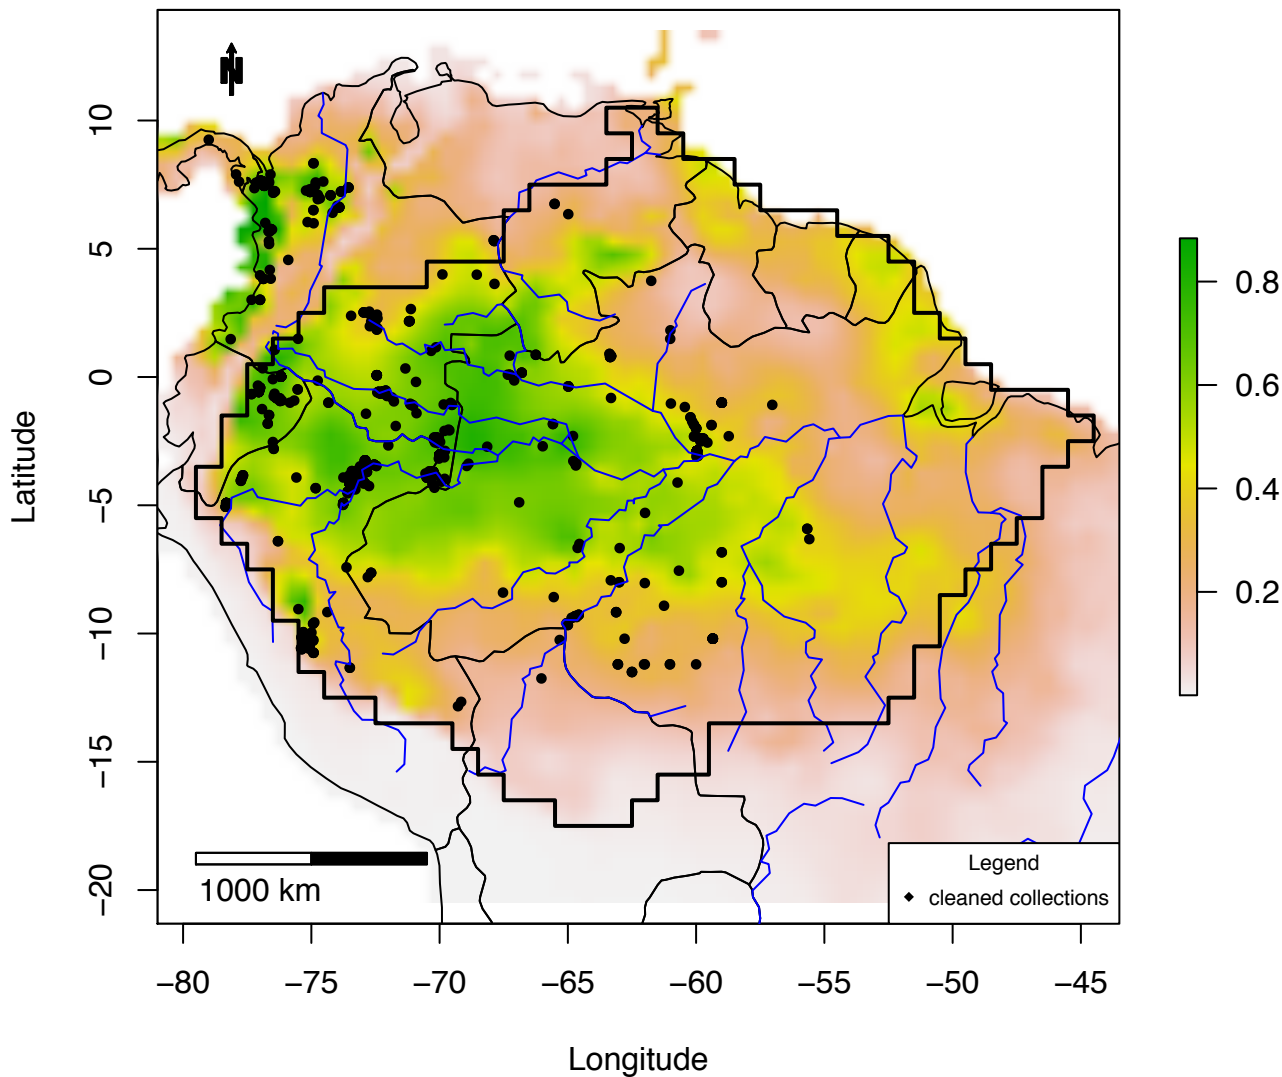

Figure S3\_75C IDW map of *Iryanthera\_ulei*:  
plots =0 – 0.18; IDW: 0 – 0.03

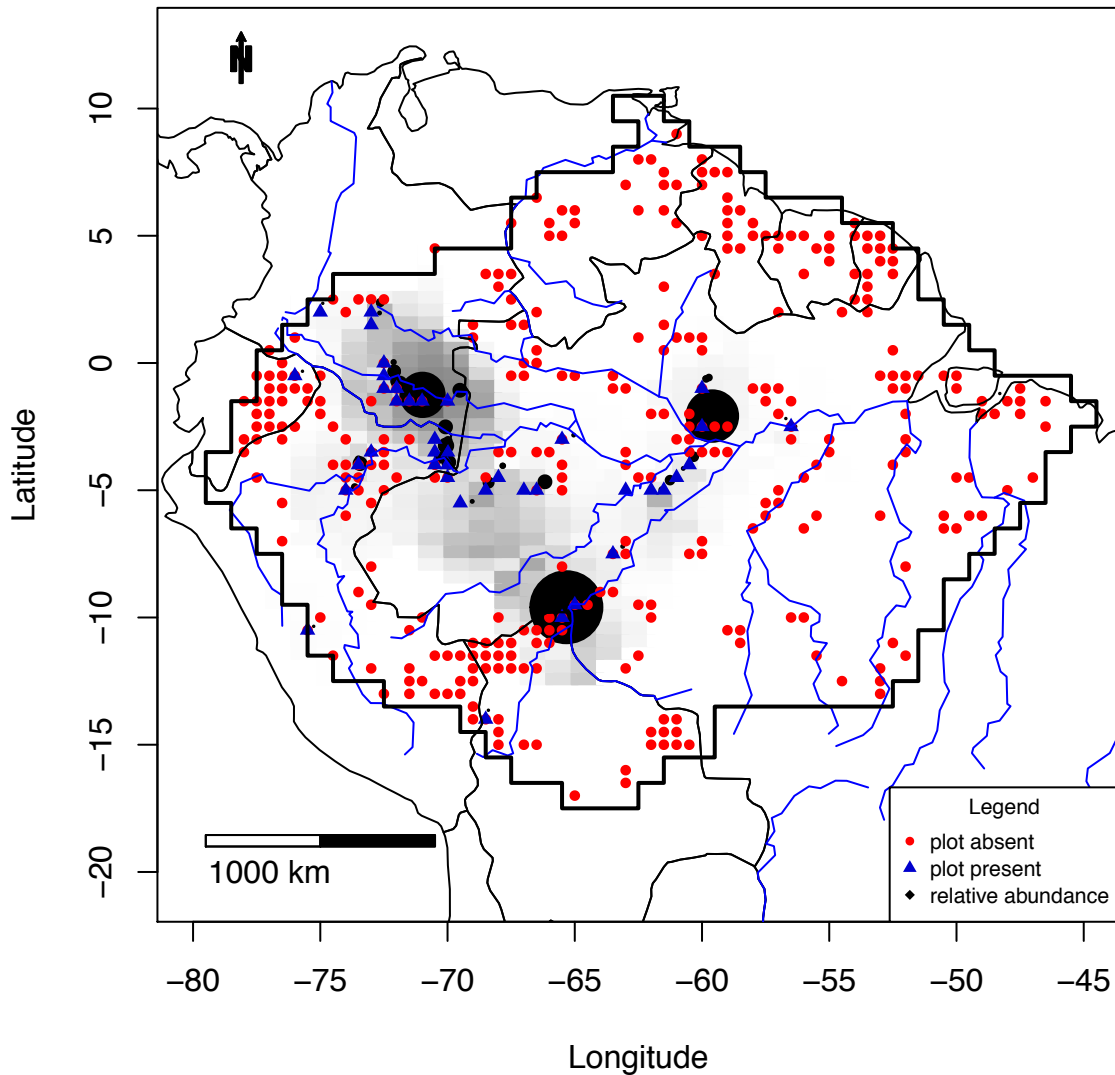

Figure S3\_76A Combined map of *Jacaranda\_copaia*

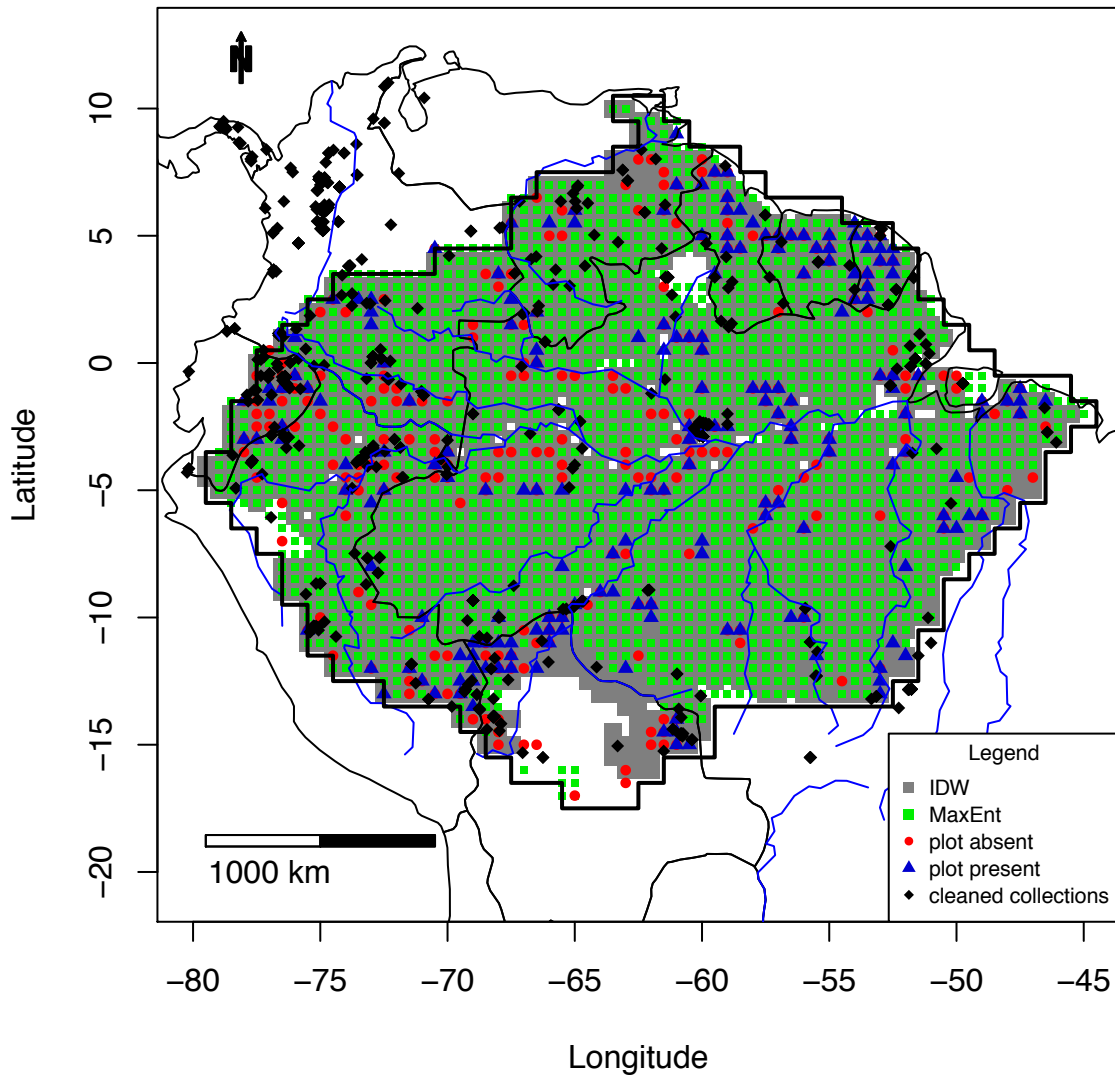

Figure S3\_76B MaxEnt map of *Jacaranda\_copaia*

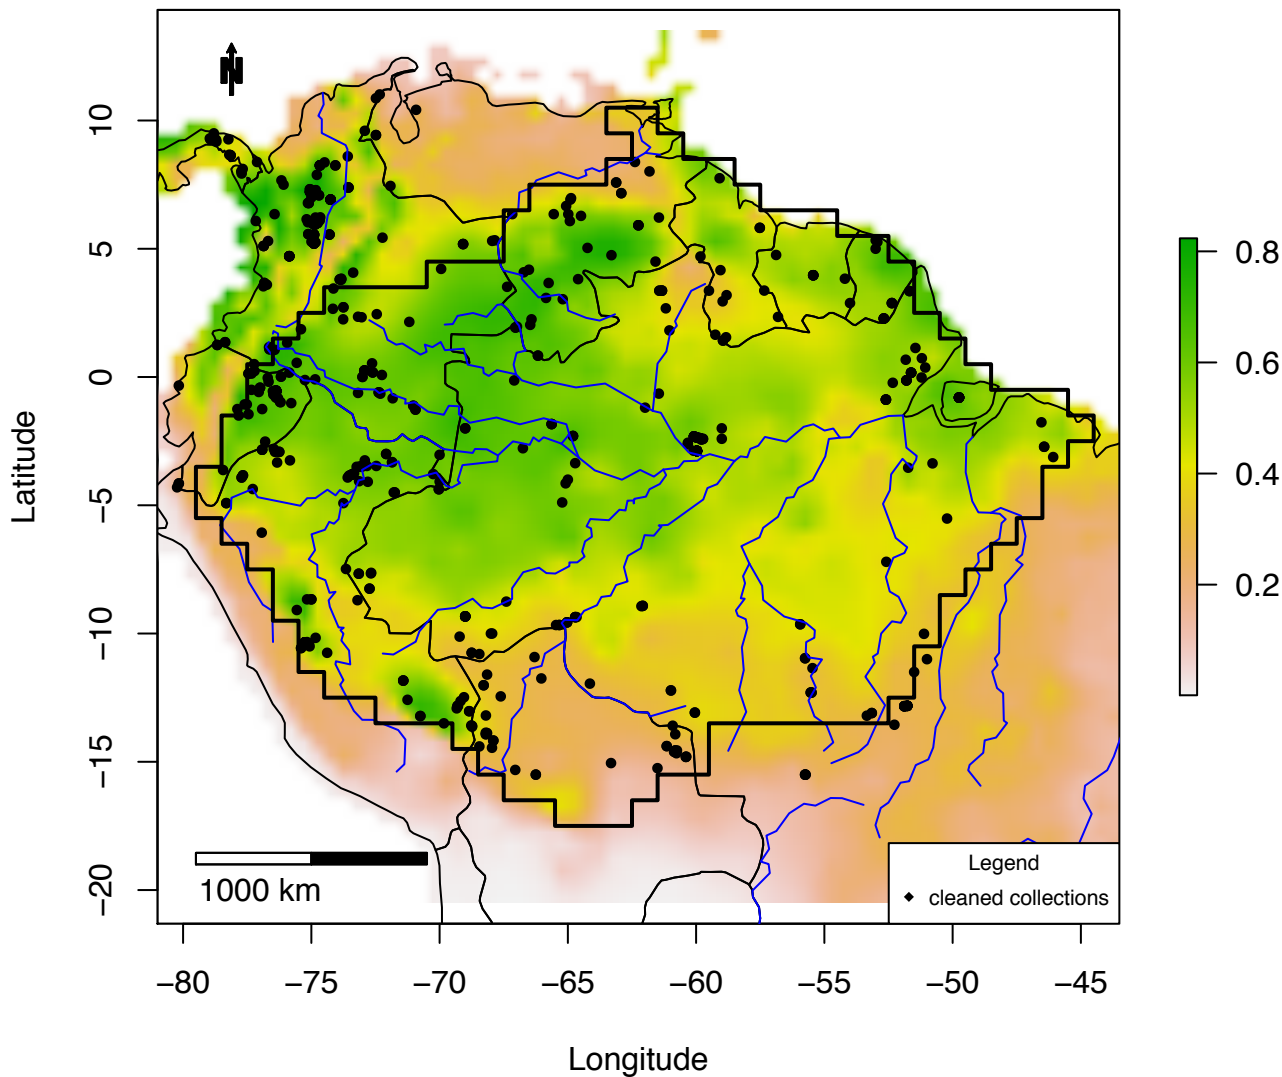

Figure S3\_76C IDW map of *Jacaranda copaia*:  
plots =0 – 0.5; IDW: 0 – 0.07

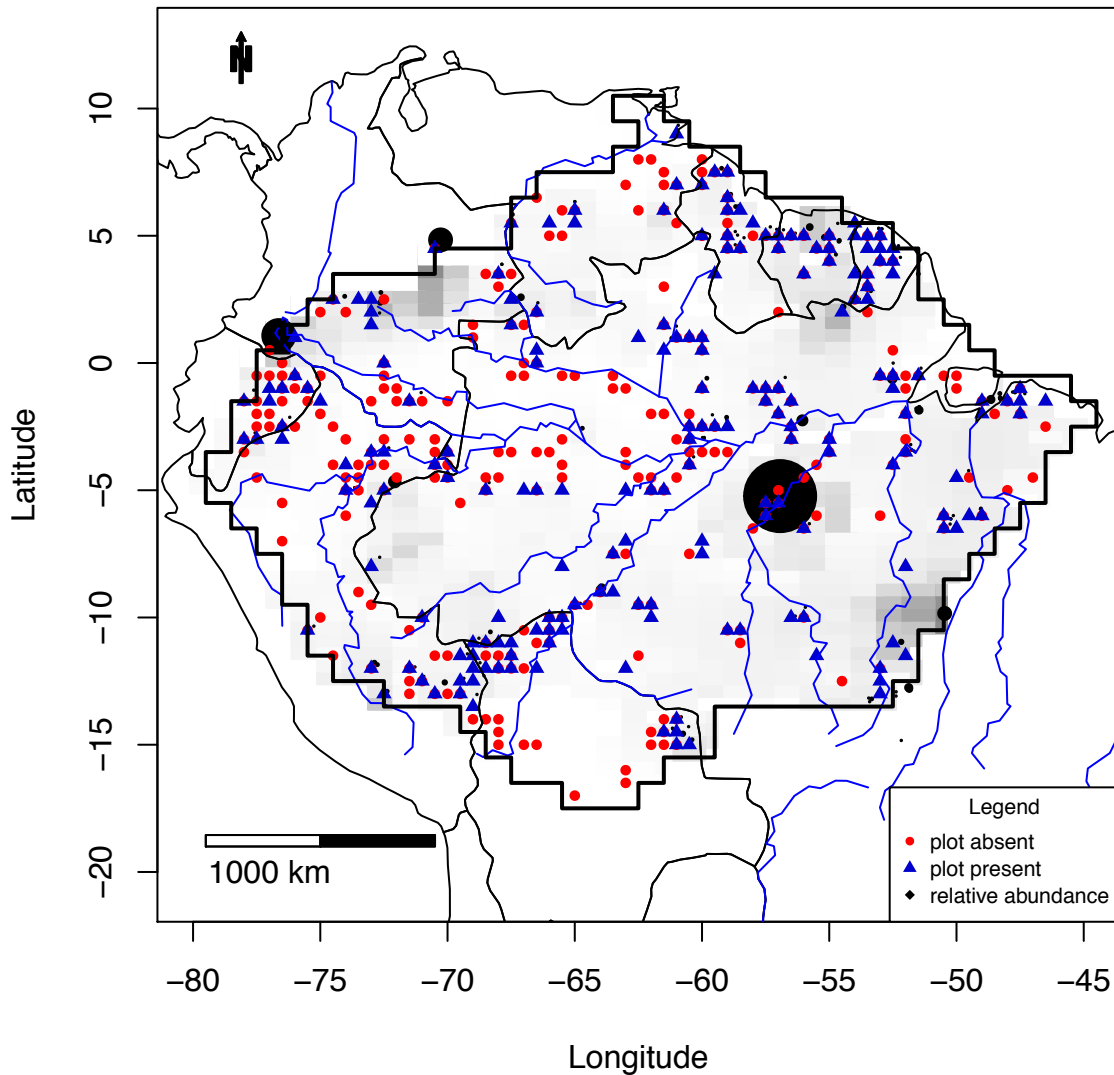

Figure S3\_77A Combined map of *Laetia corymbulosa*

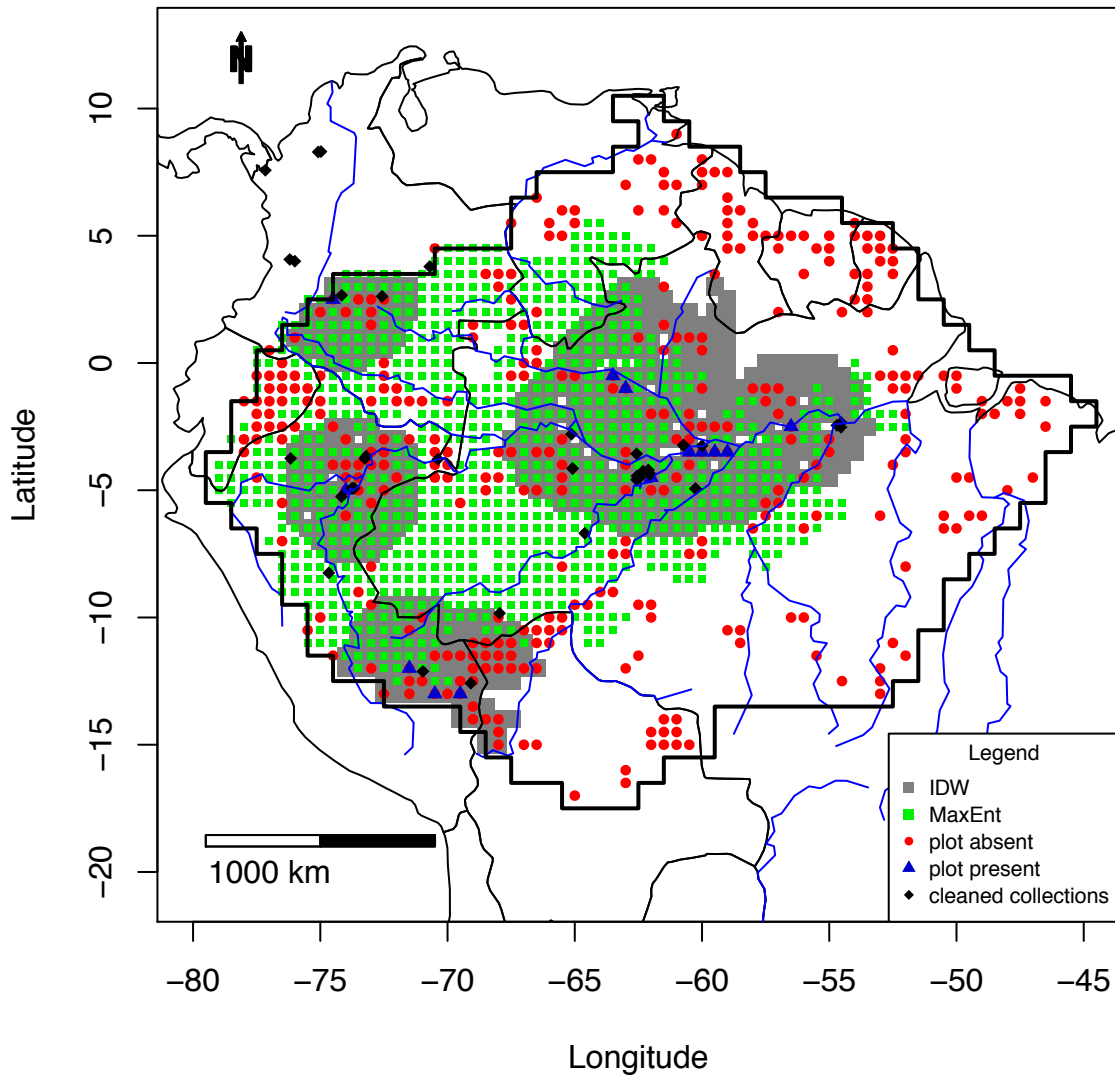

Figure S3\_77B MaxEnt map of *Laetia\_corymbulosa*

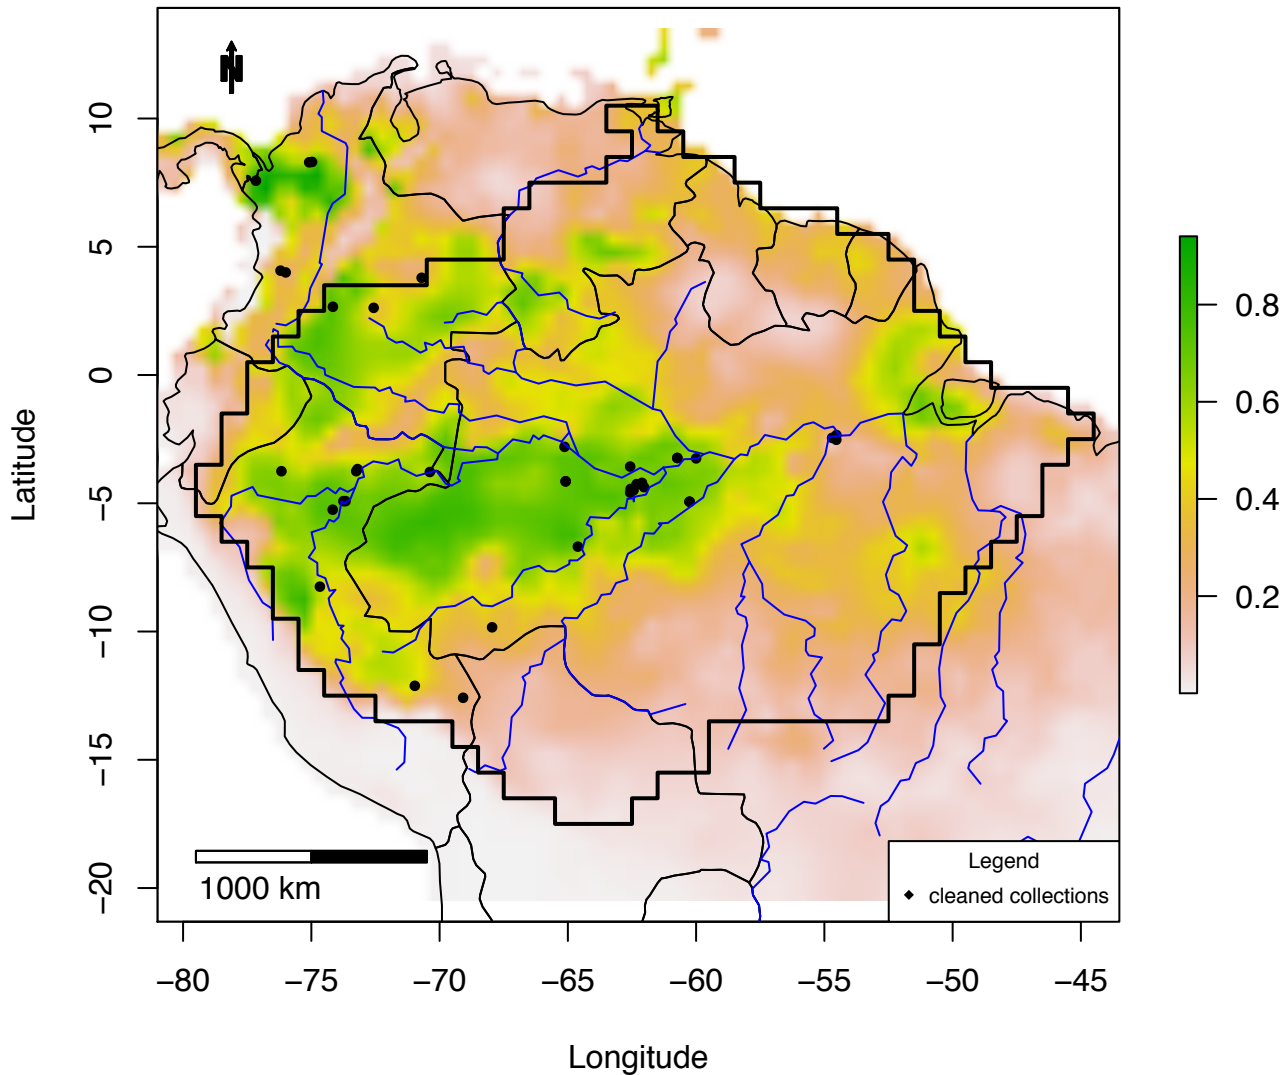

**Figure S3\_77C IDW map of *Laetia corymbulosa*:**  
plots =0 – 0.47; IDW: 0 – 0.07

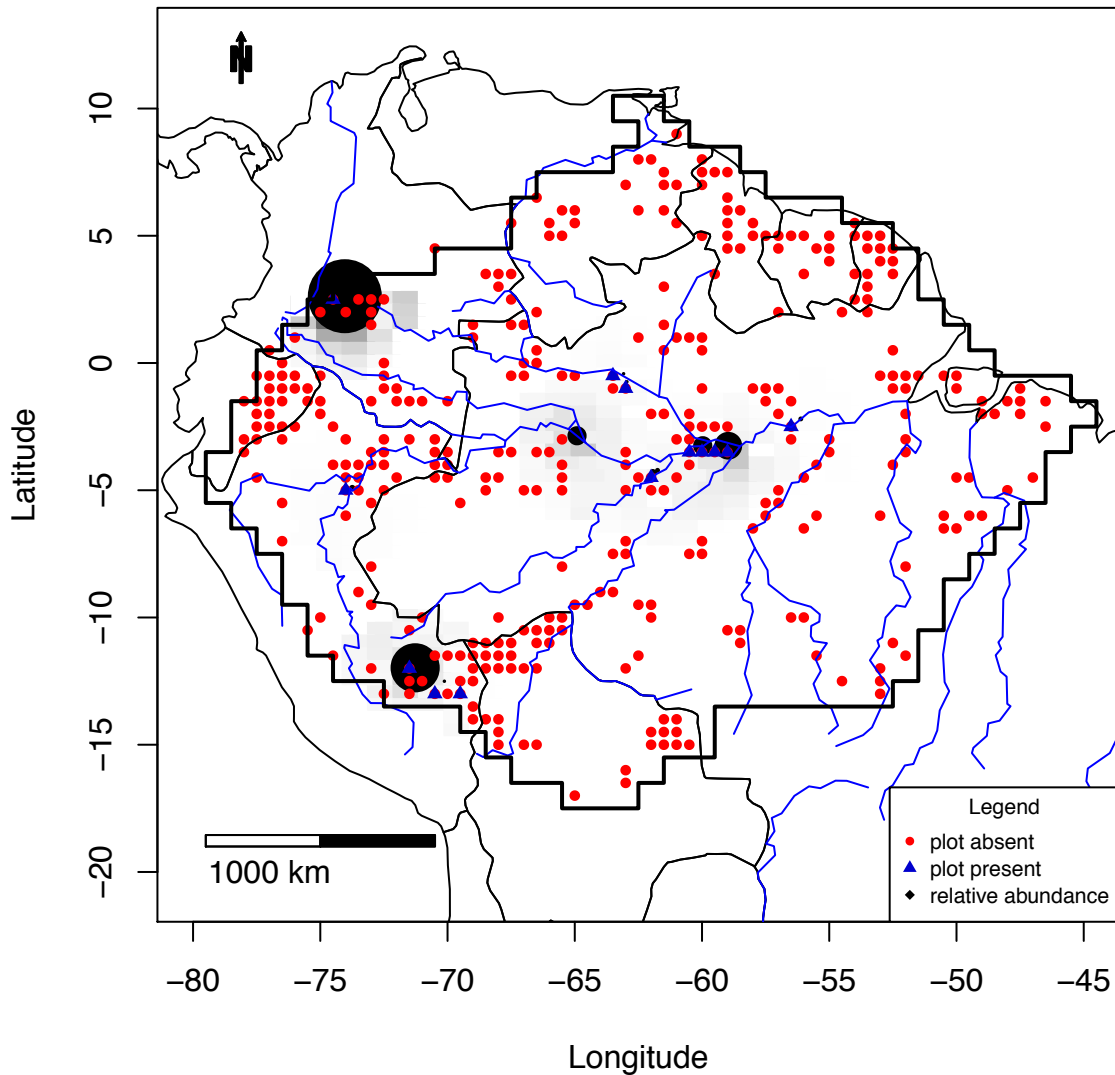



Figure S3\_78A Combined map of *Laetia procera*

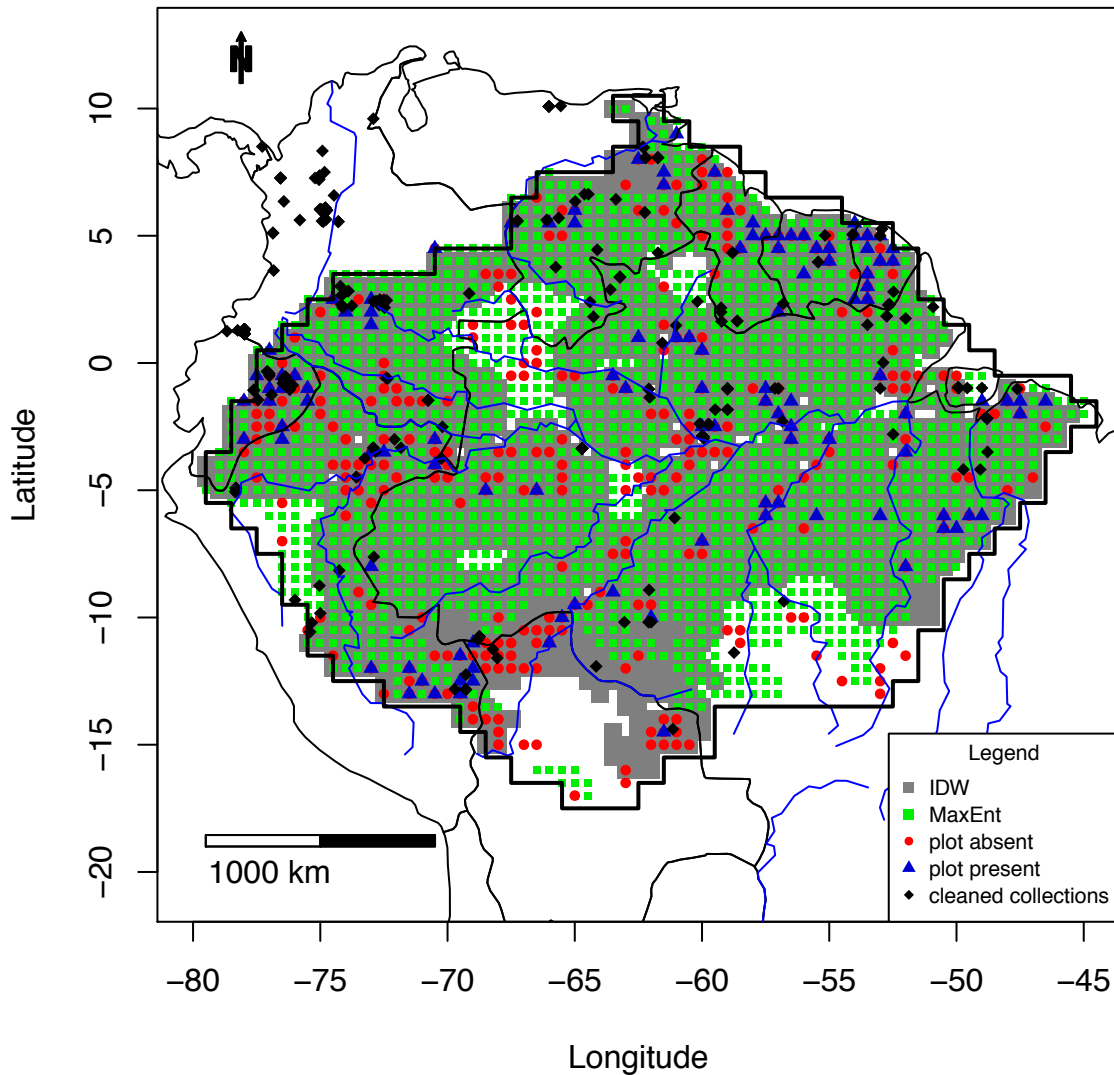

Figure S3\_78B MaxEnt map of *Laetia procera*

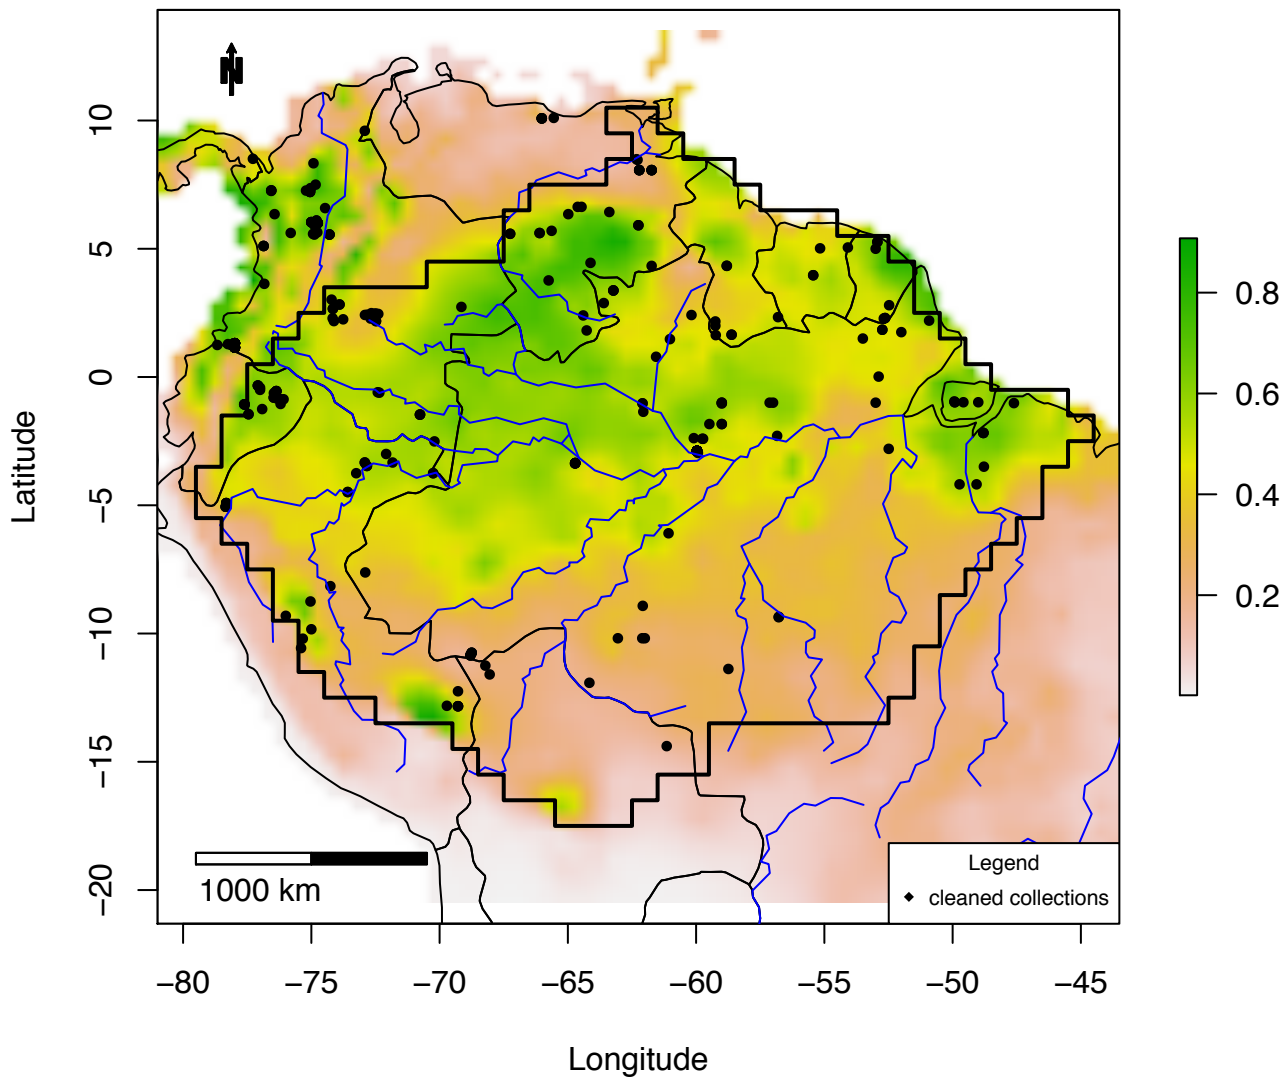

Figure S3\_78C IDW map of *Laetia procera*:  
plots =0 – 0.14; IDW: 0 – 0.03

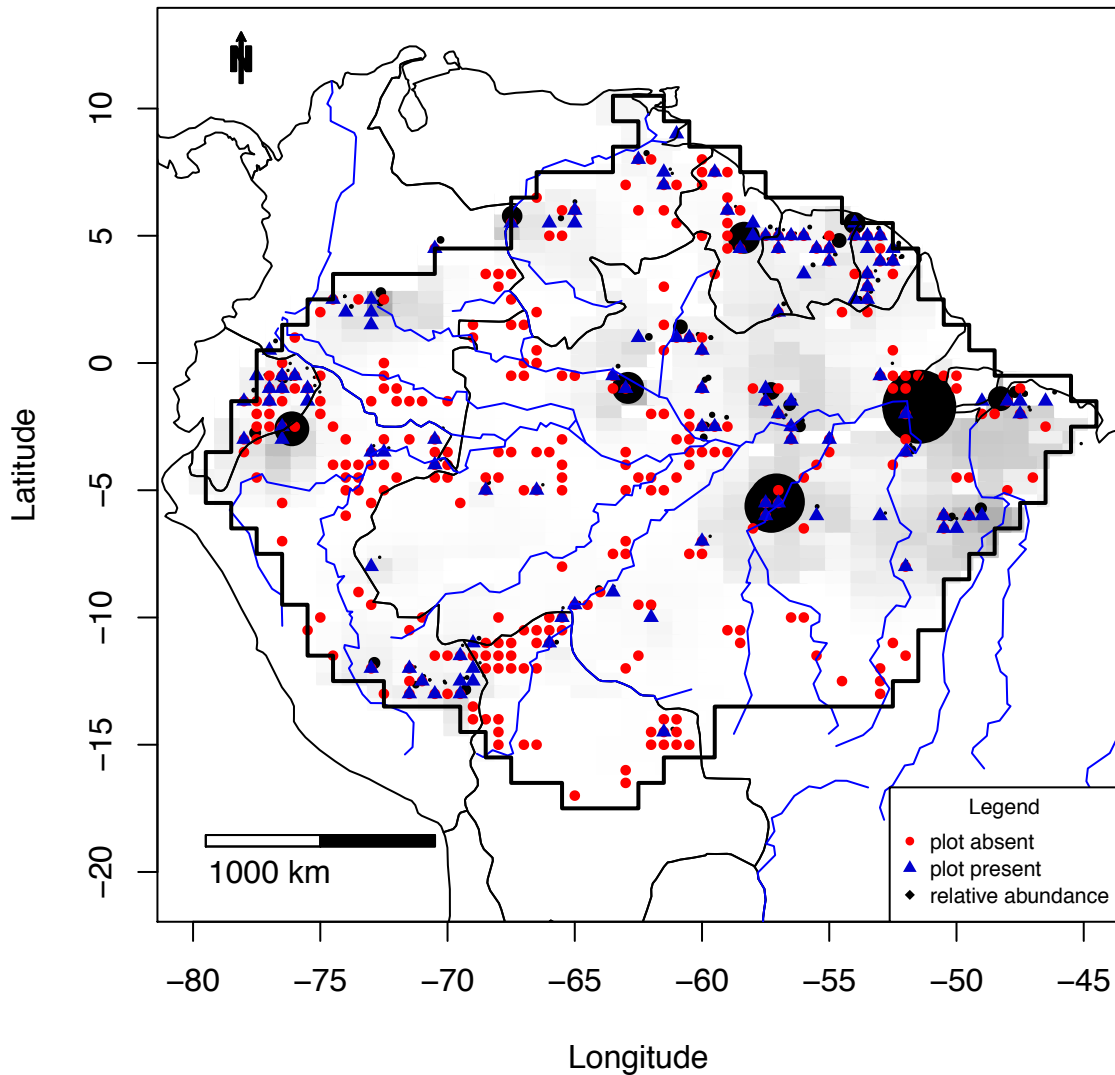

Figure S3\_79A Combined map of *Lecythis\_corrugata*

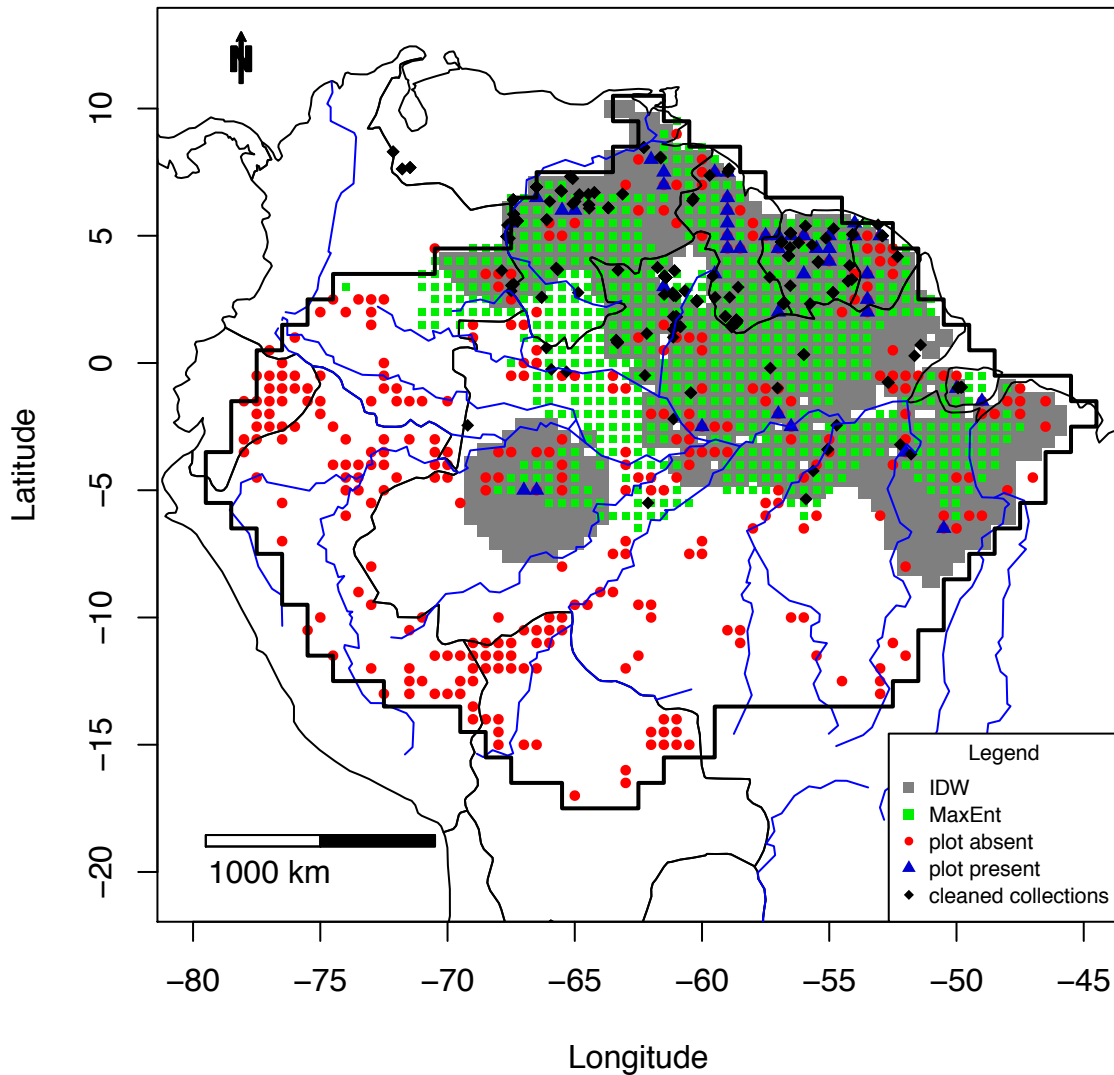

Figure S3\_79B MaxEnt map of *Lecythis\_corrugata*

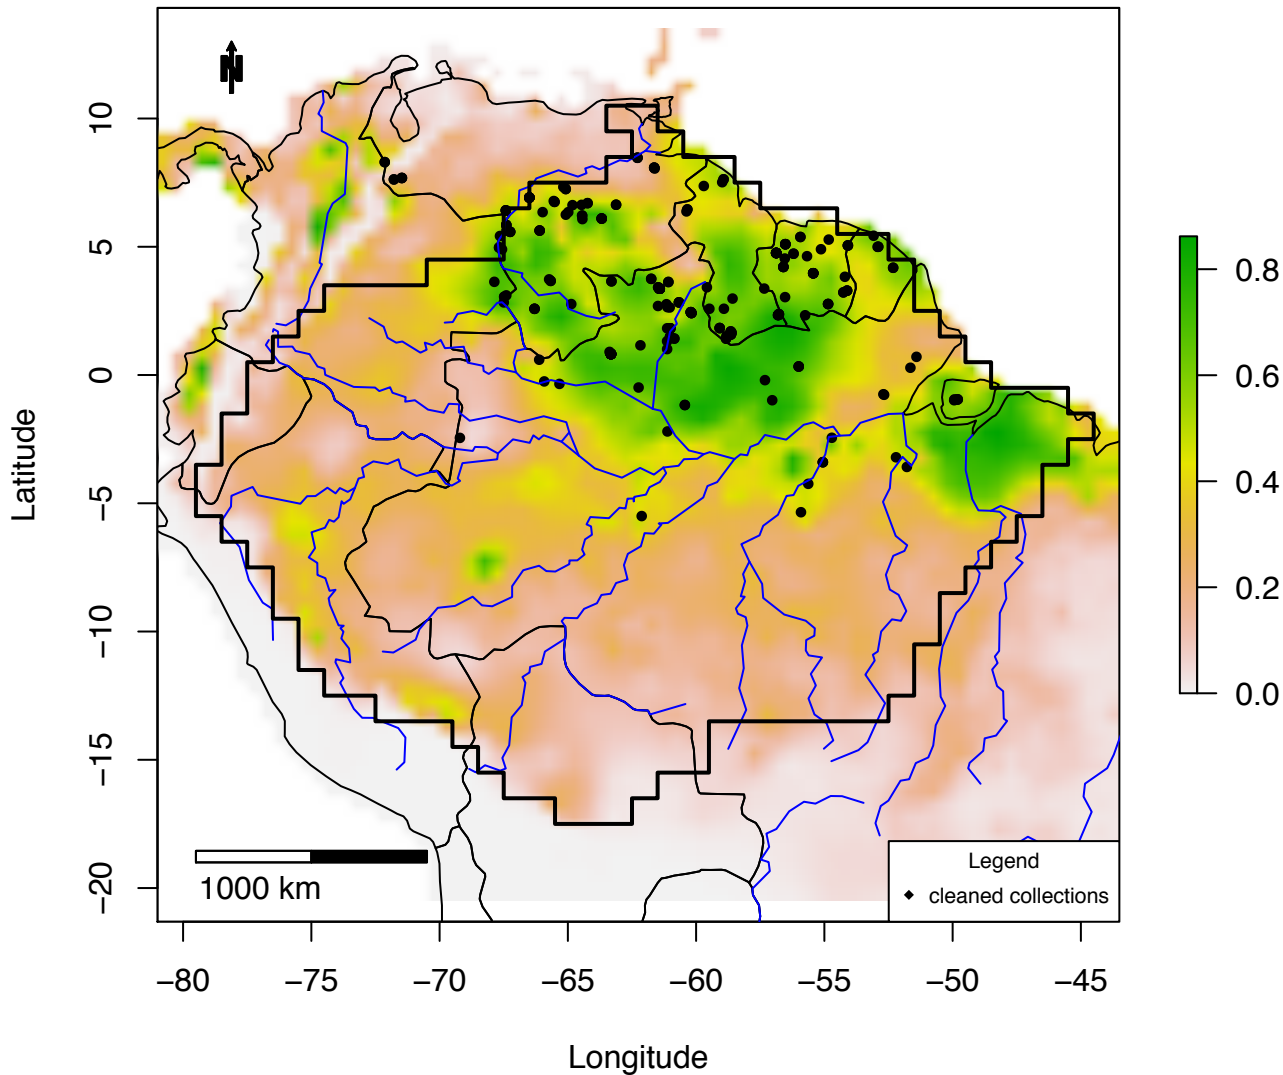

**Figure S3\_79C IDW map of *Lecythis corrugata*:**  
plots =0 – 0.17; IDW: 0 – 0.09

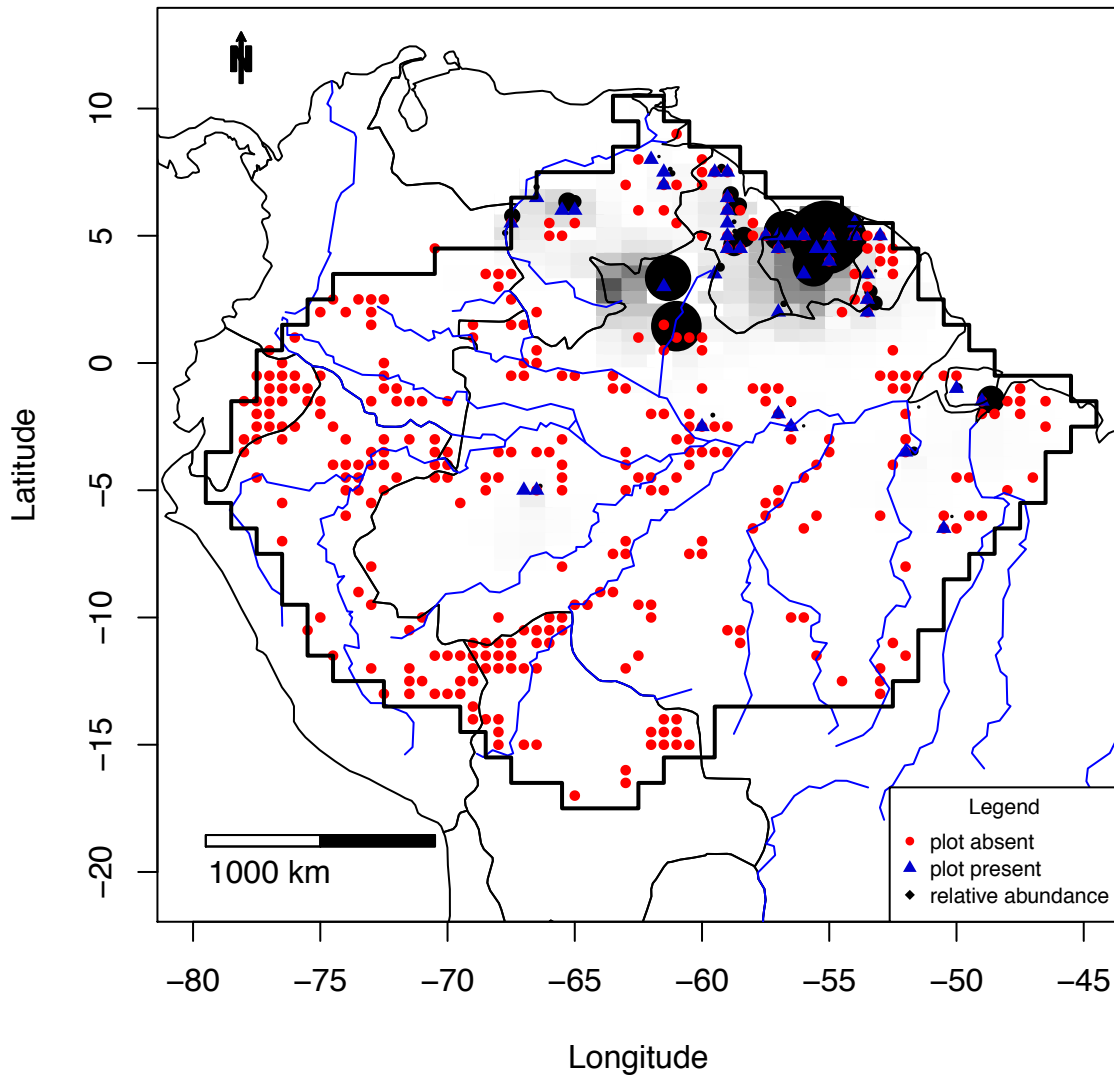

Figure S3\_80A Combined map of *Lecythis idatimon*

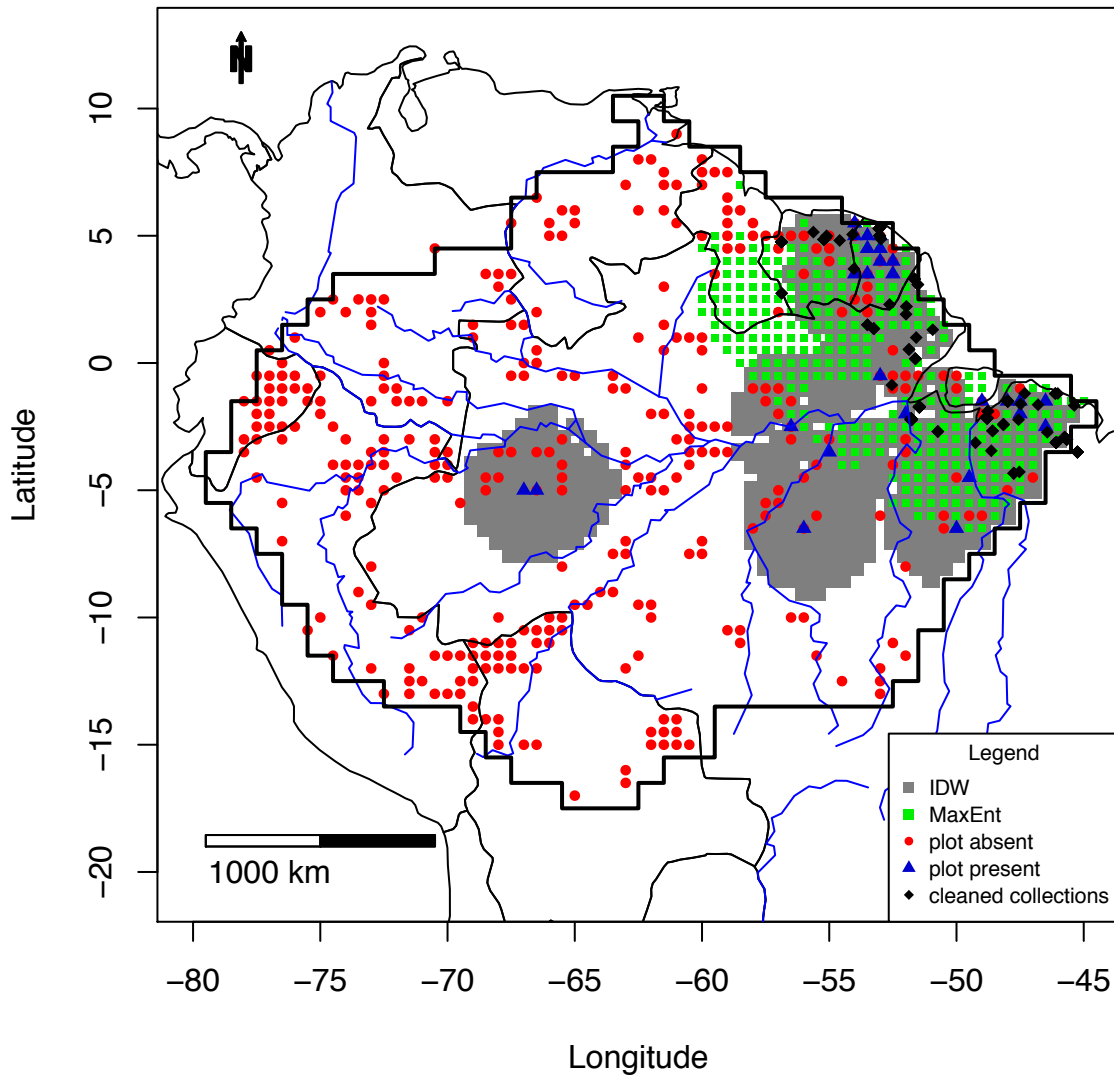

Figure S3\_80B MaxEnt map of *Lecythis idatimon*

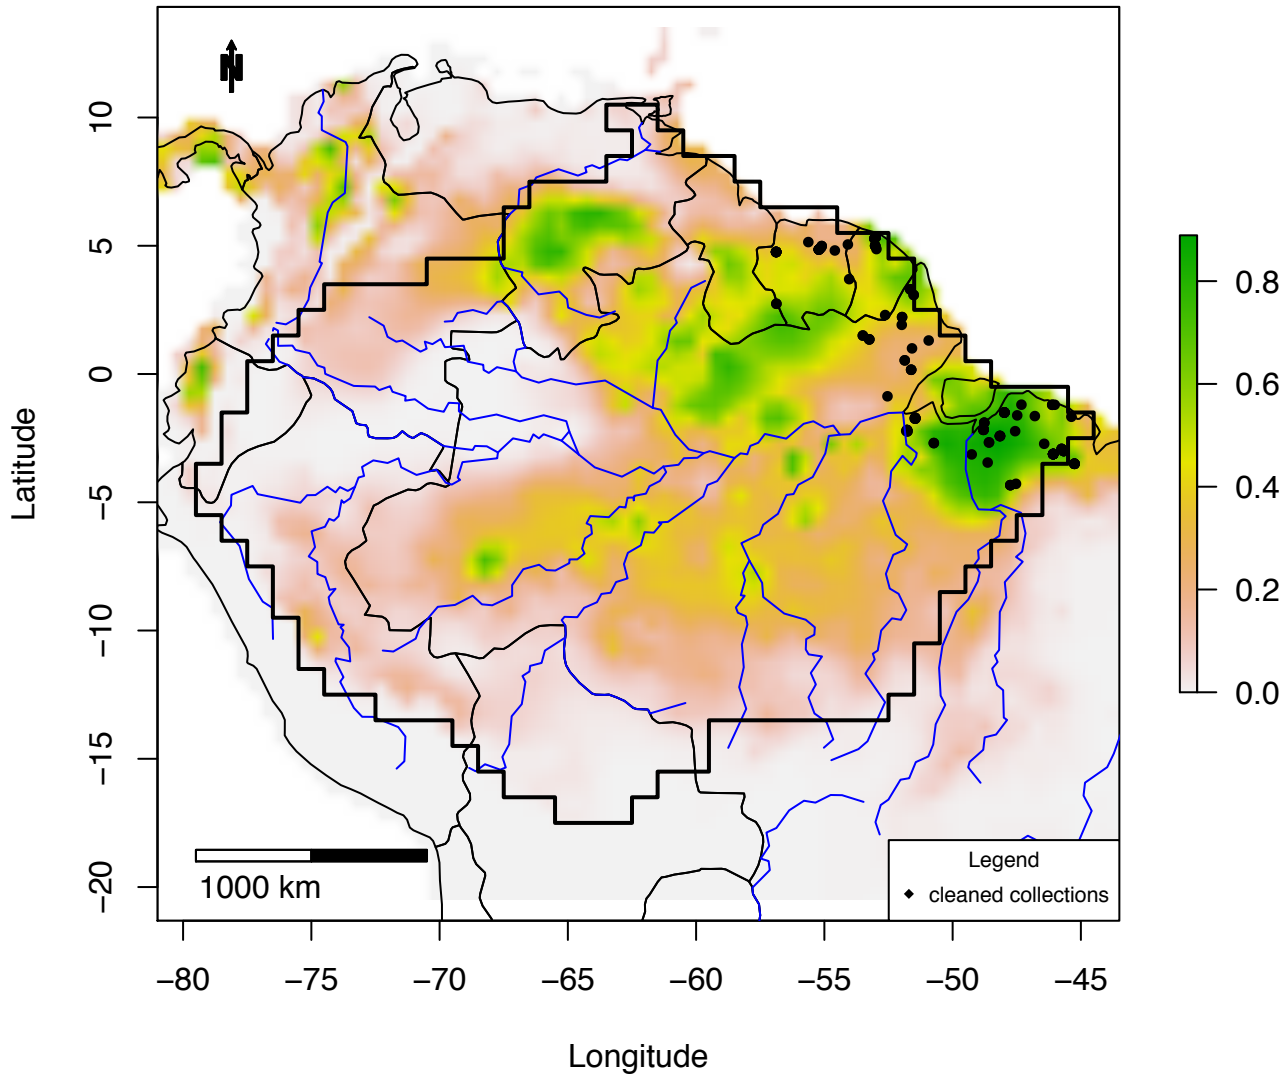



Figure S3\_80C IDW map of *Lecythis idatimon*:  
plots = 0 – 0.21; IDW: 0 – 0.06

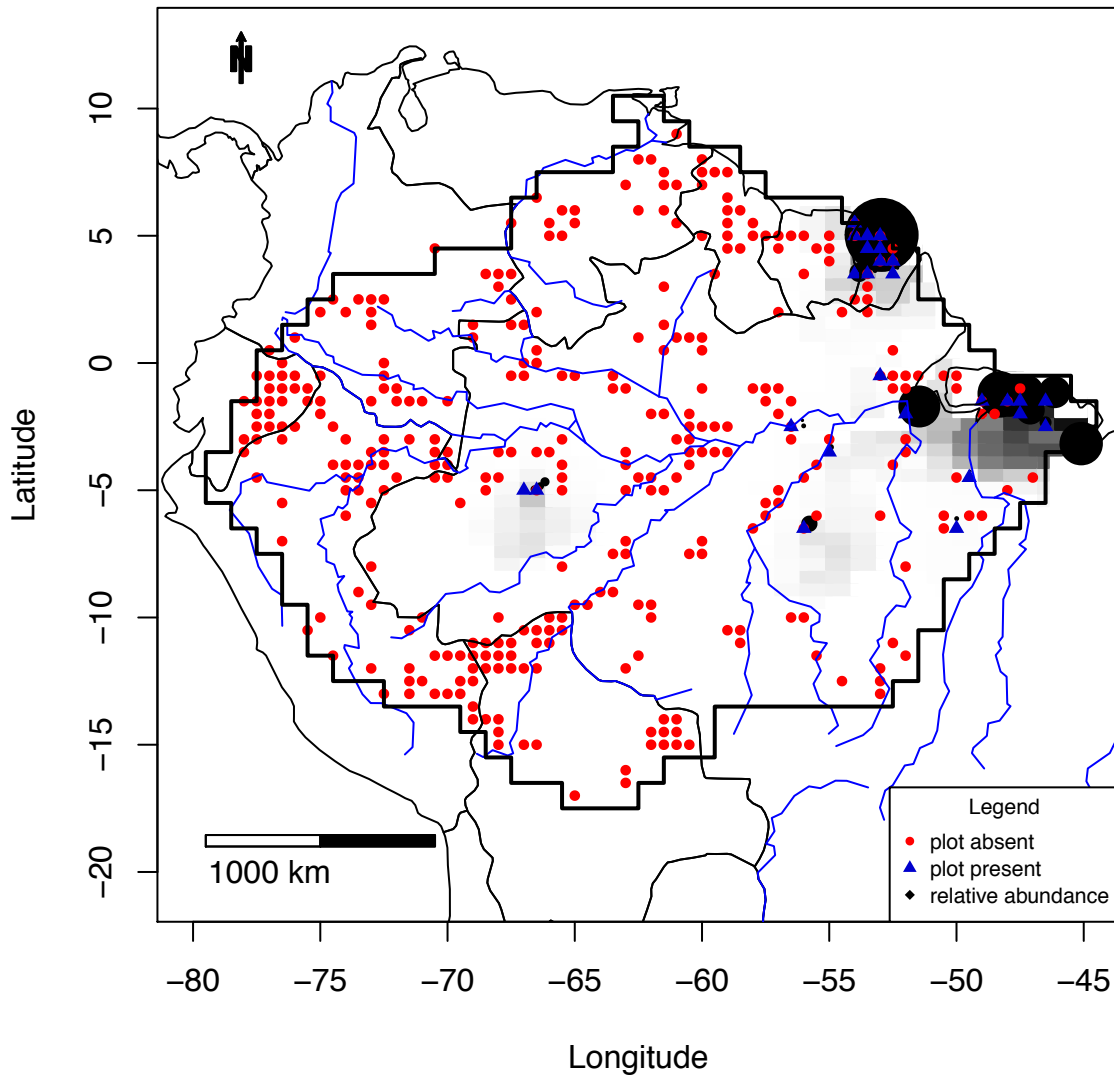

Figure S3\_81A Combined map of *Leonia\_crassa*

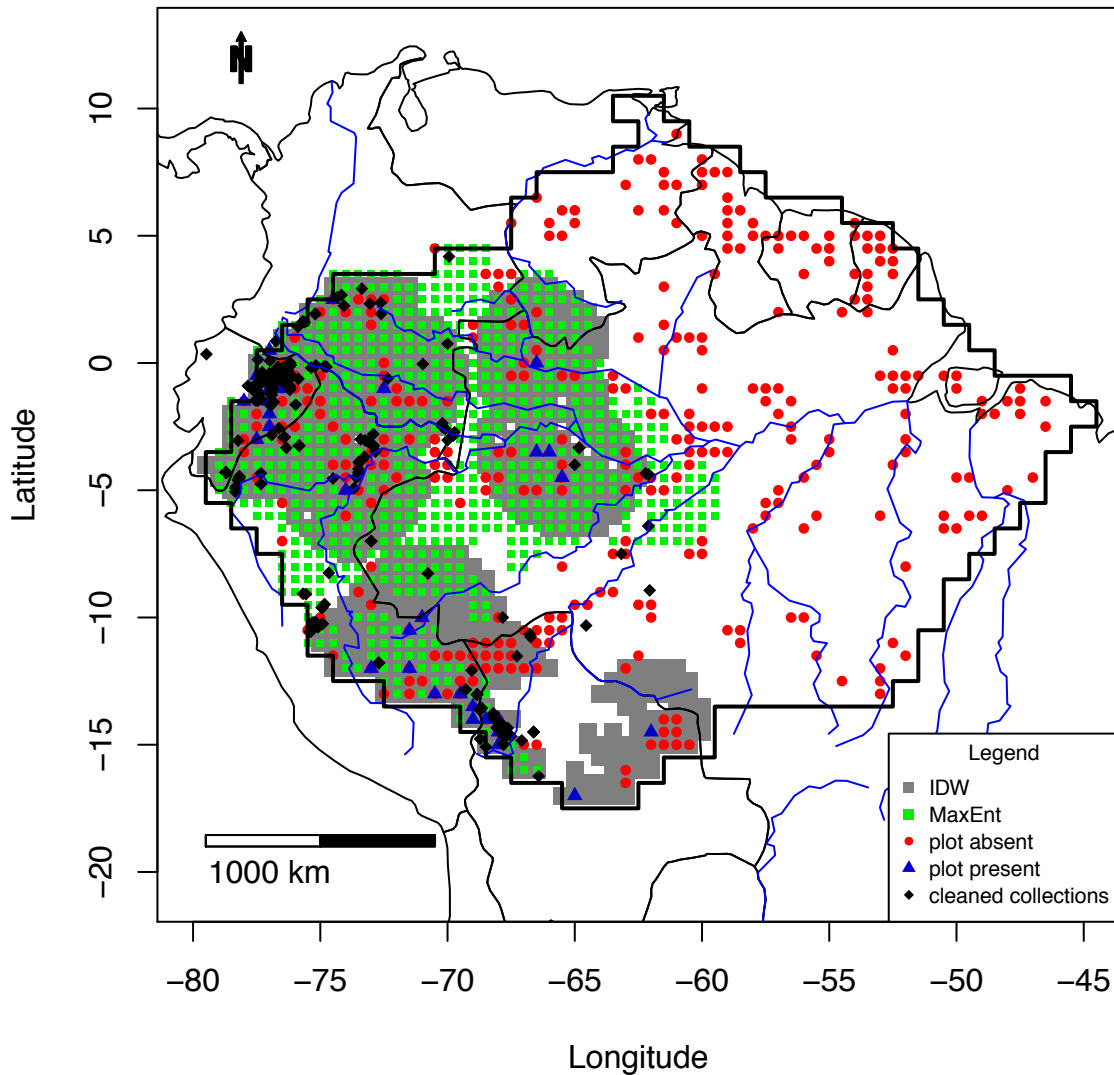

Figure S3\_81B MaxEnt map of *Leonia\_crassa*

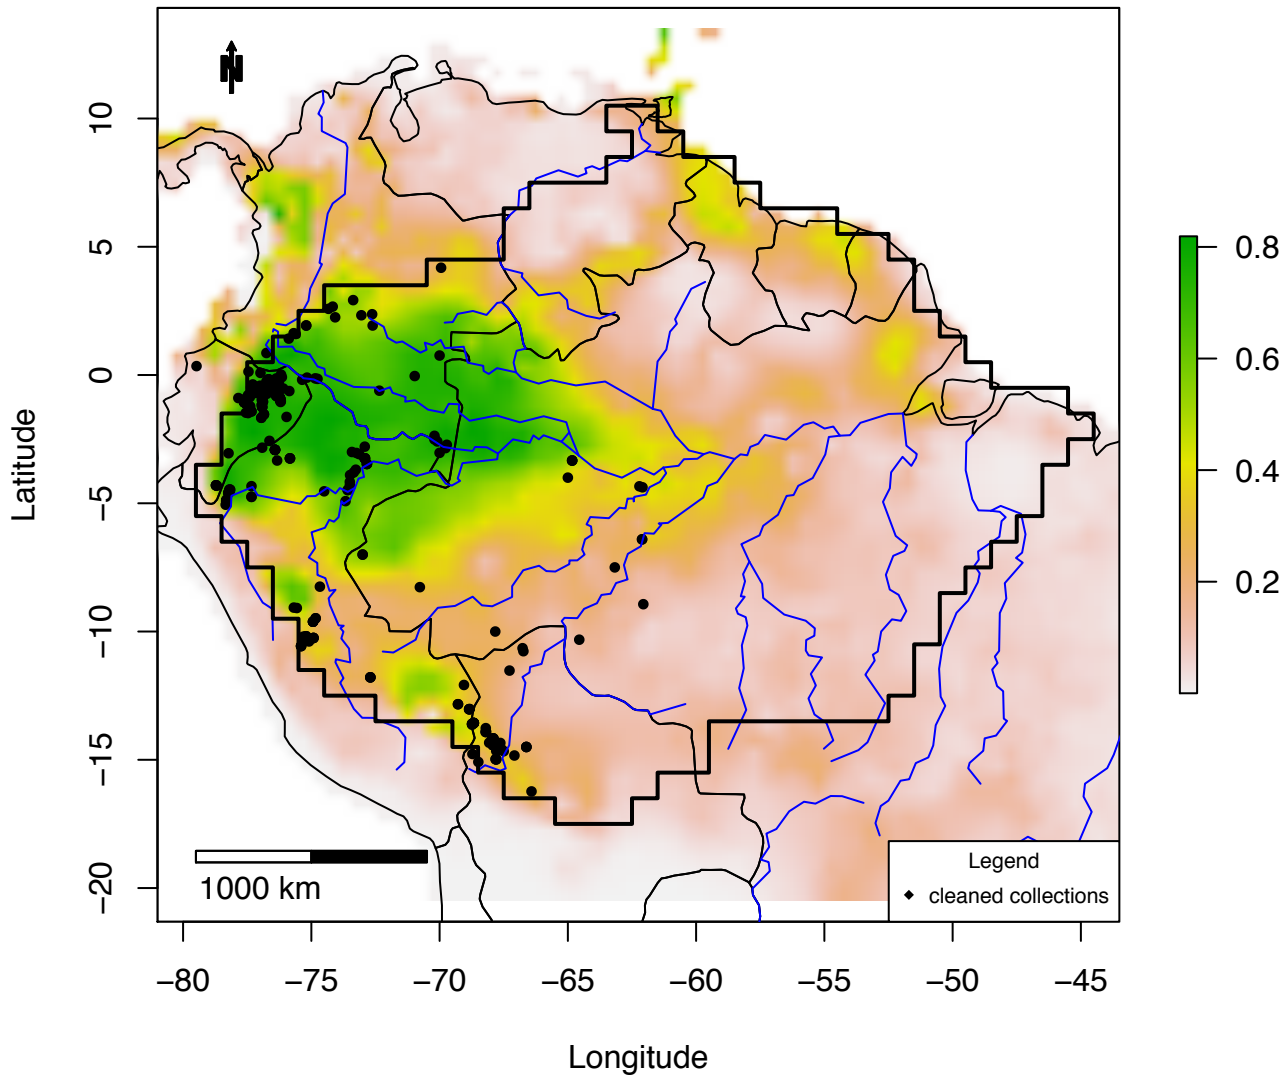

**Figure S3\_81C IDW map of *Leonia crassa*:**  
**plots =0 – 0.16; IDW: 0 – 0.11**

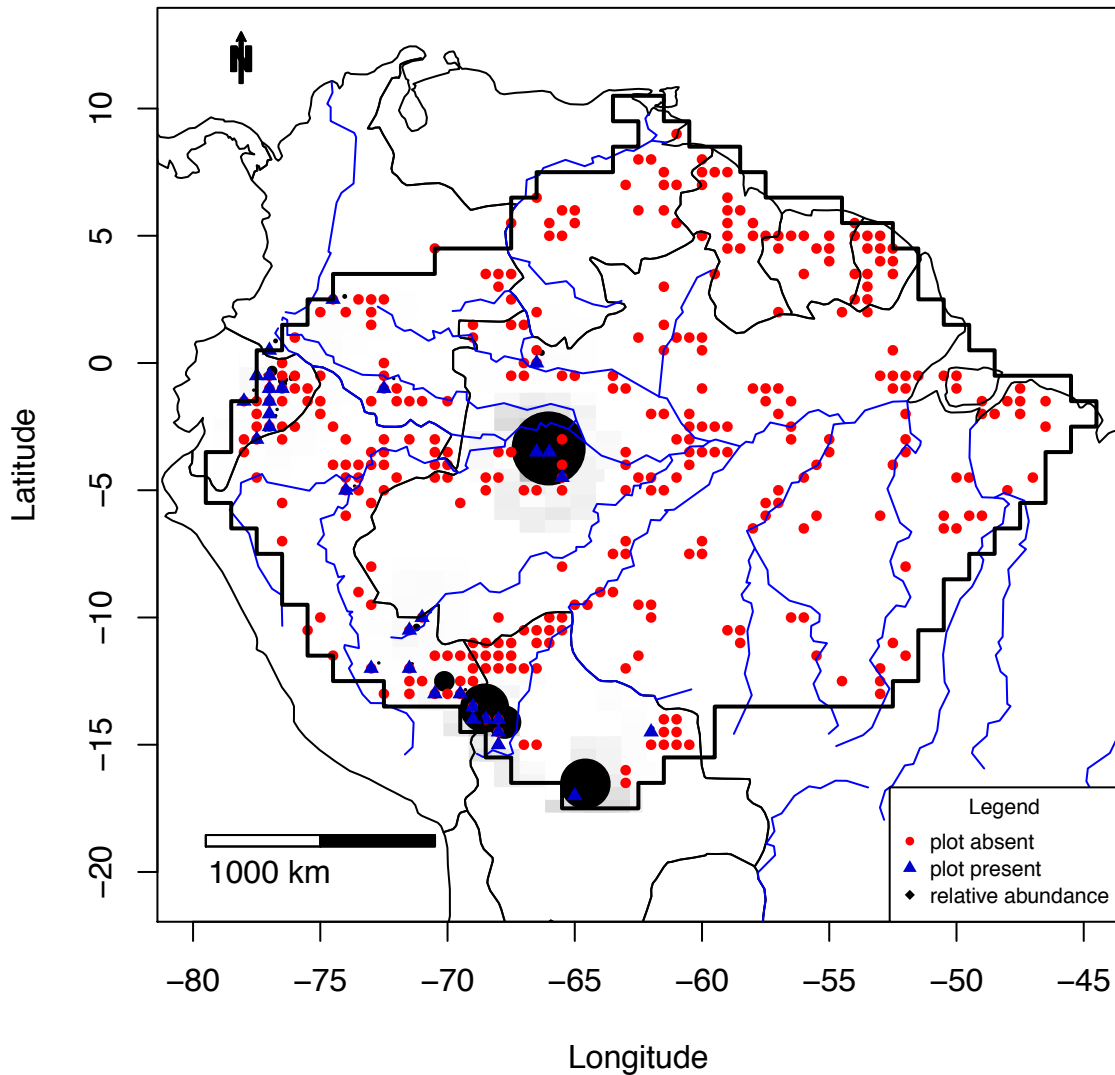

Figure S3\_82A Combined map of *Leonia\_glycyarpa*

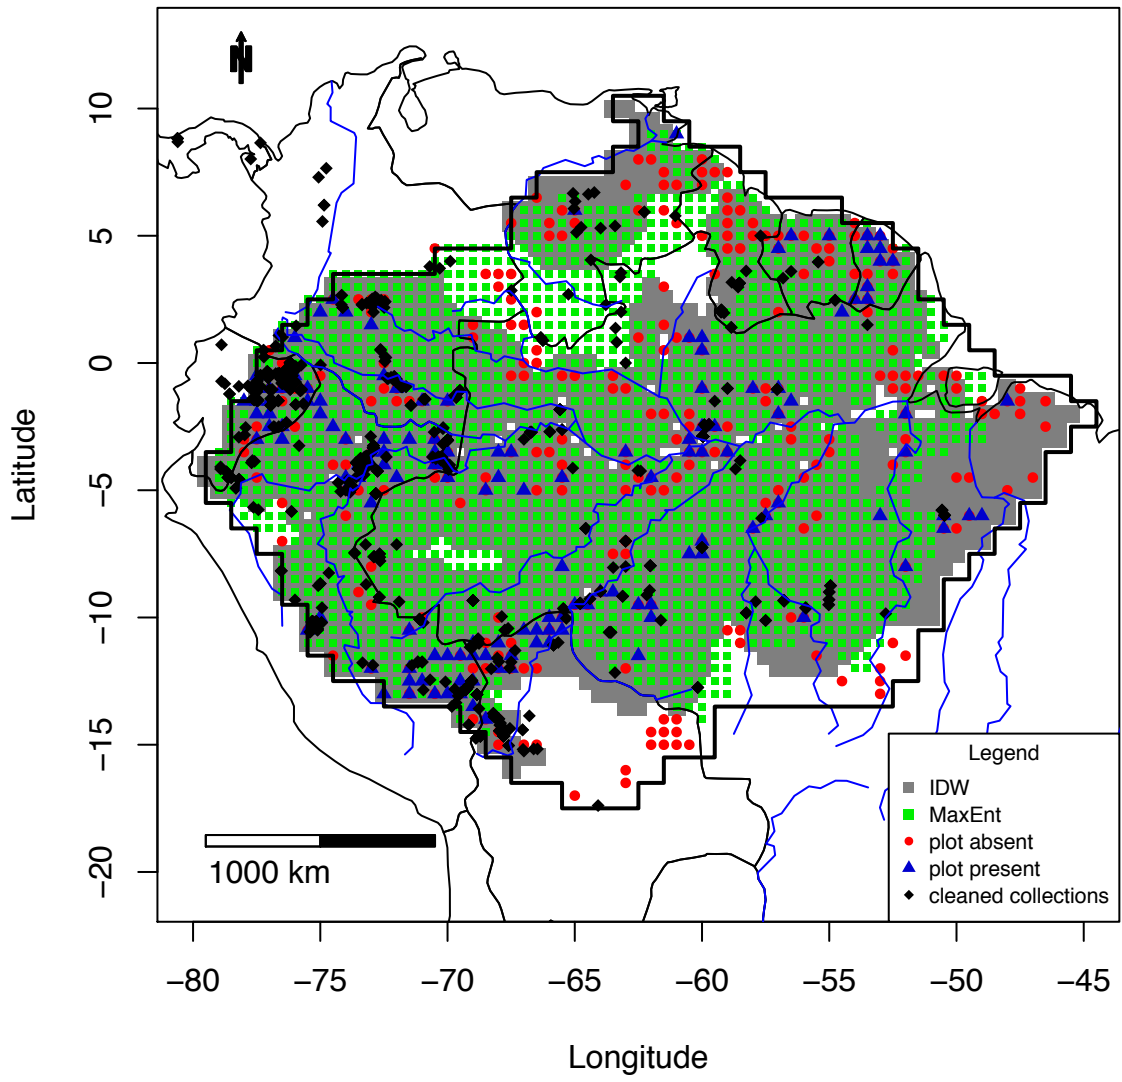

Figure S3\_82B MaxEnt map of *Leonia\_glycyarpa*

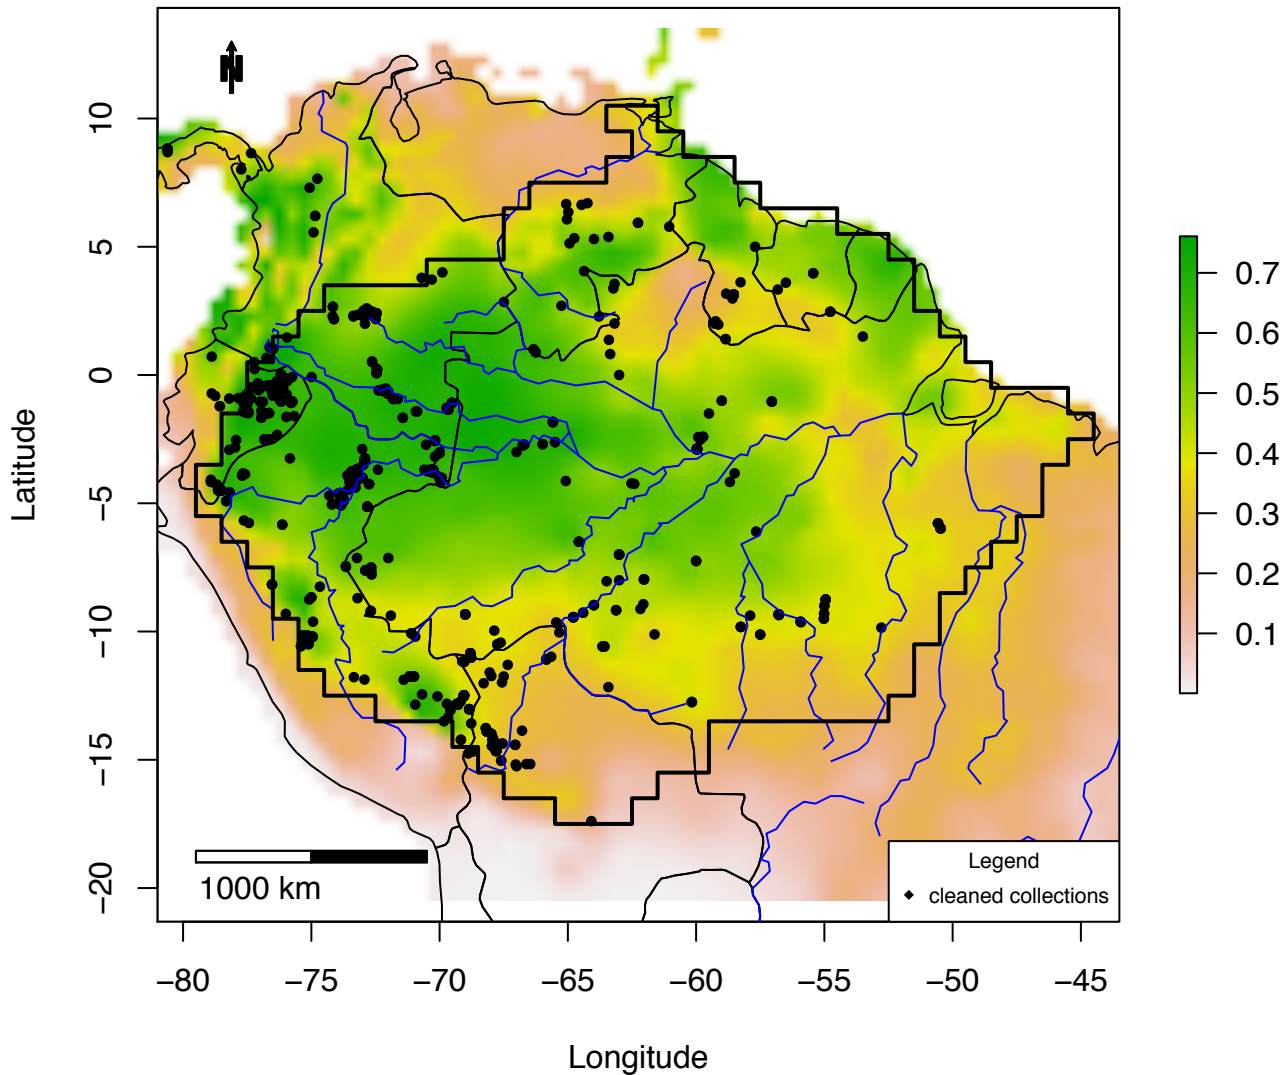

Figure S3\_82C IDW map of *Leonia glycyarpa*:  
plots =0 – 0.57; IDW: 0 – 0.04

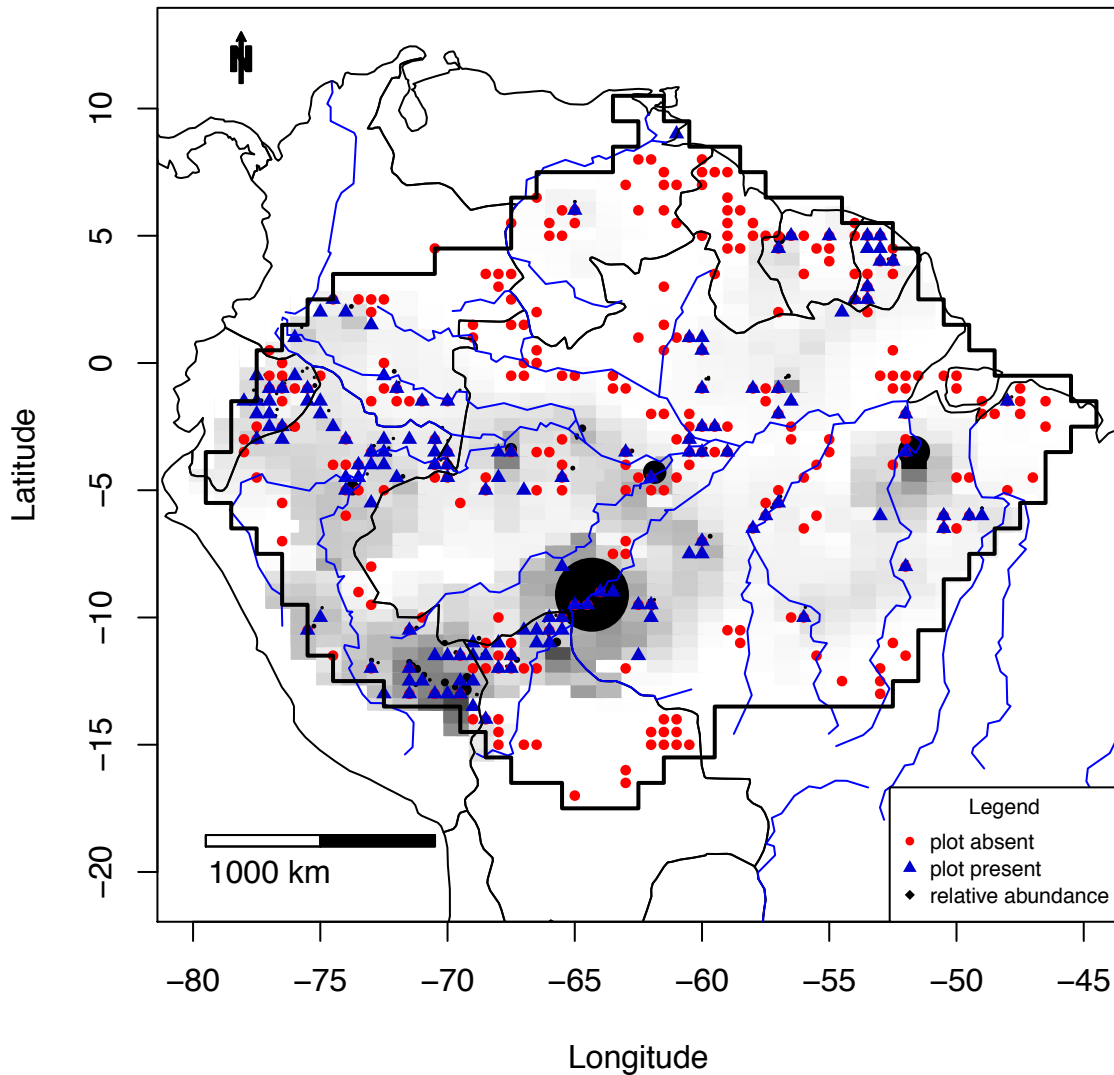

Figure S3\_83A Combined map of *Licania\_alba*

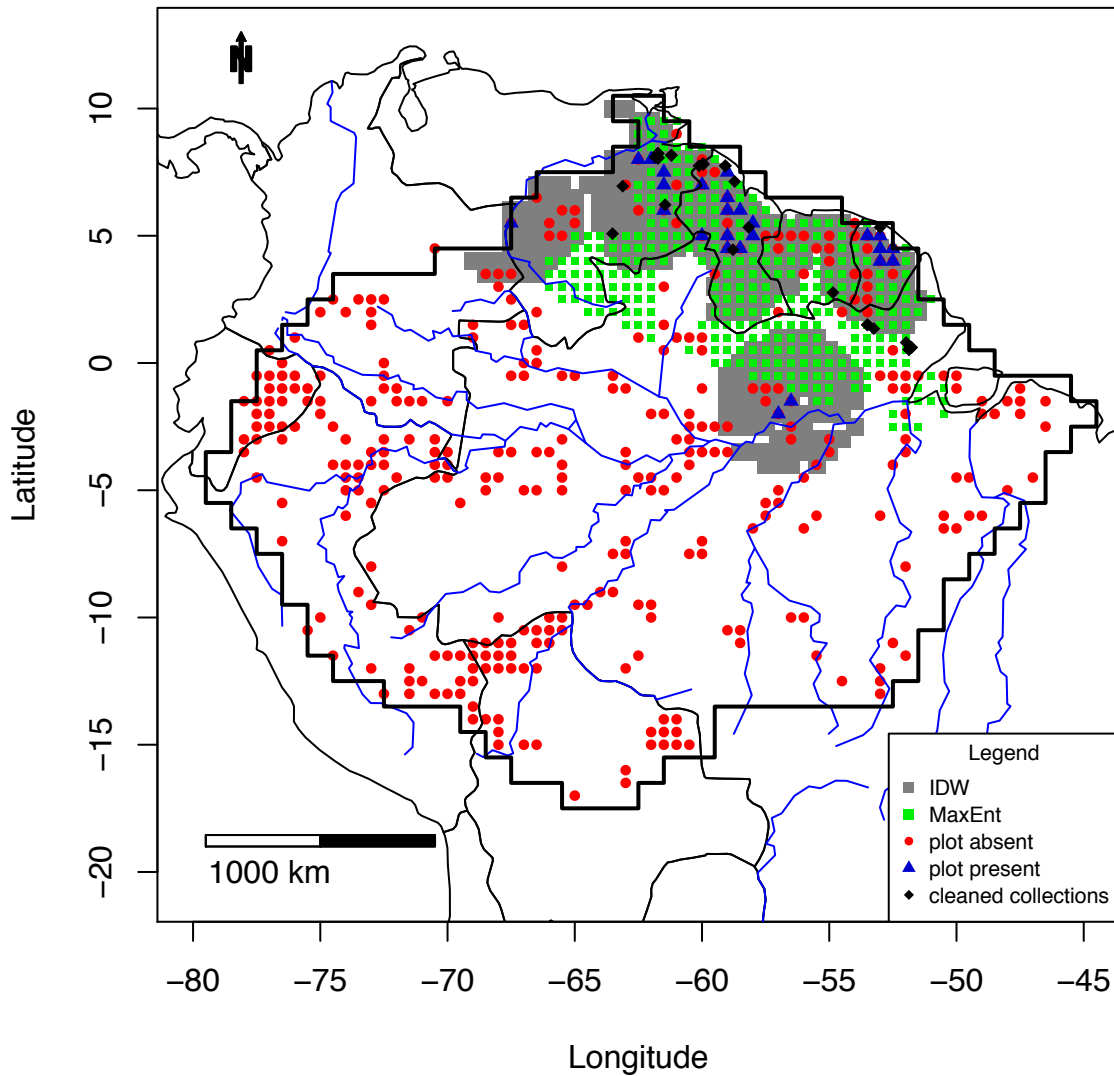



Figure S3\_83B MaxEnt map of *Licania\_alba*

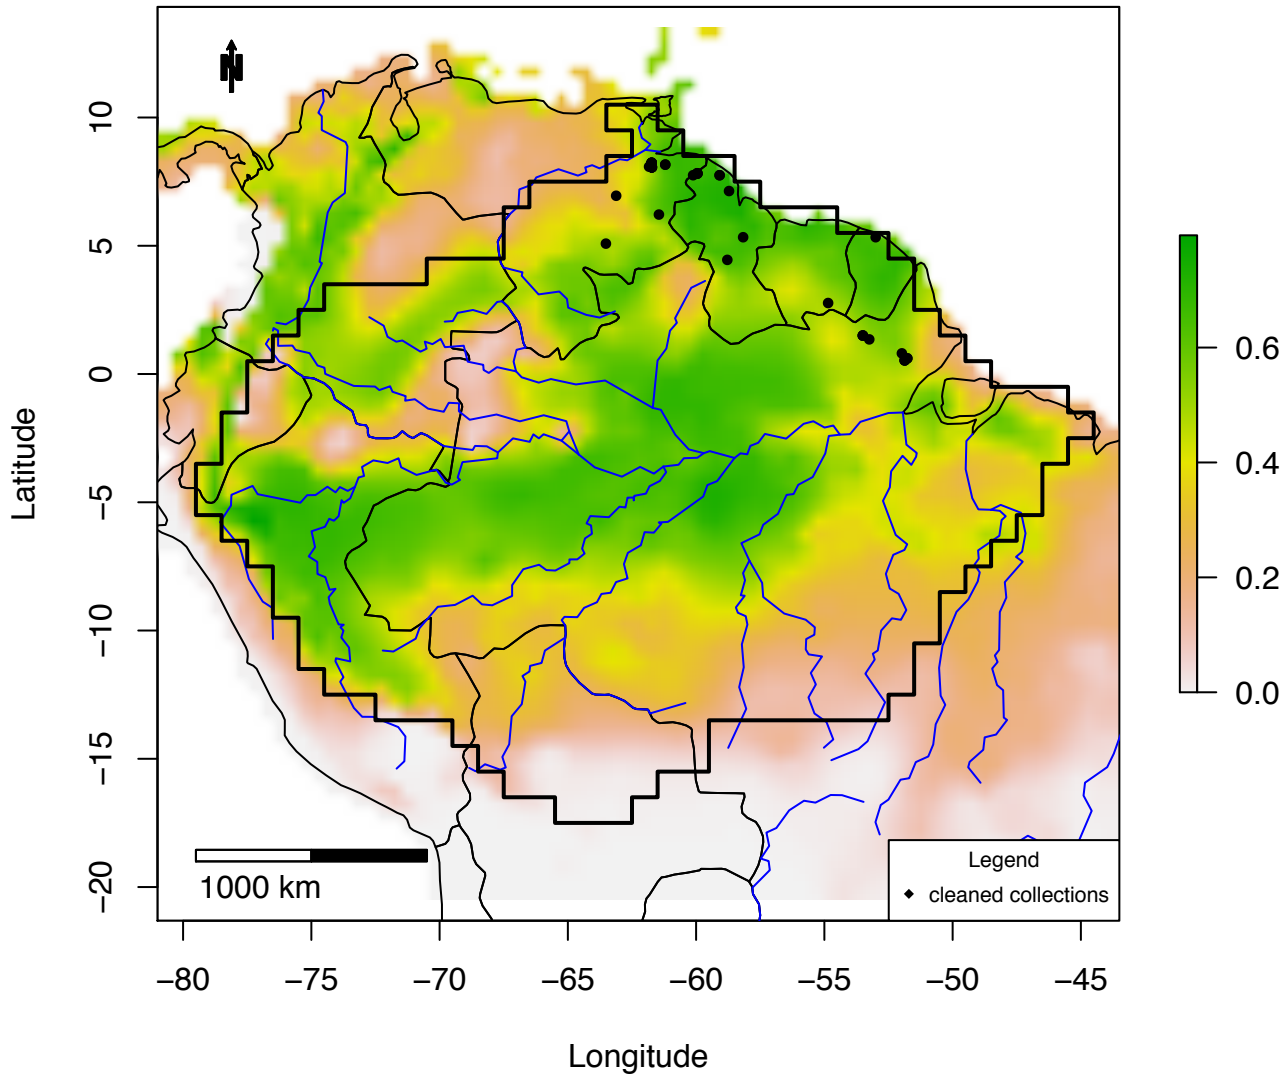

**Figure S3\_83C IDW map of *Licania alba*:**  
**plots =0 – 0.12; IDW: 0 – 0.04**

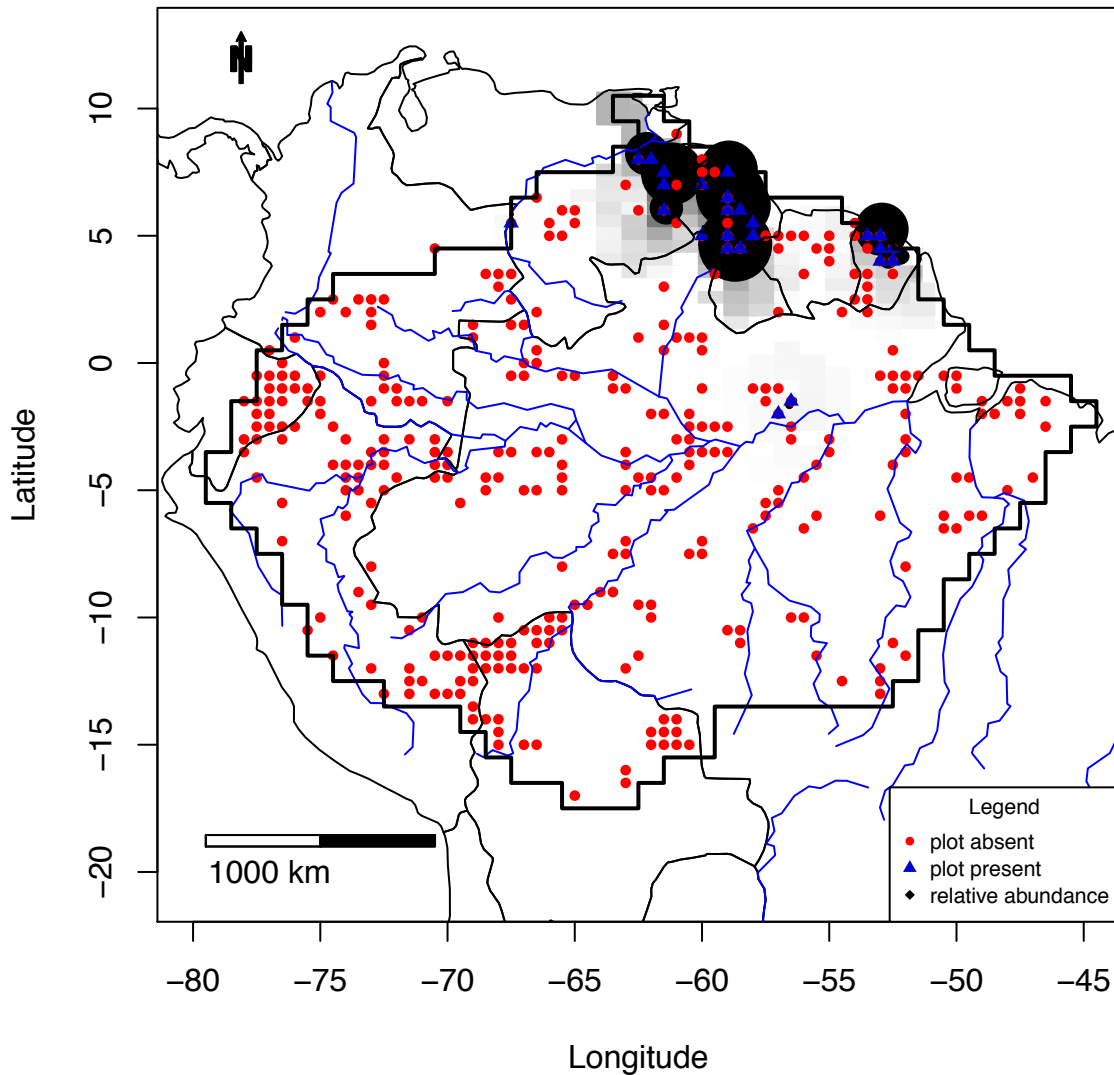

Figure S3\_84A Combined map of *Licania apetala*

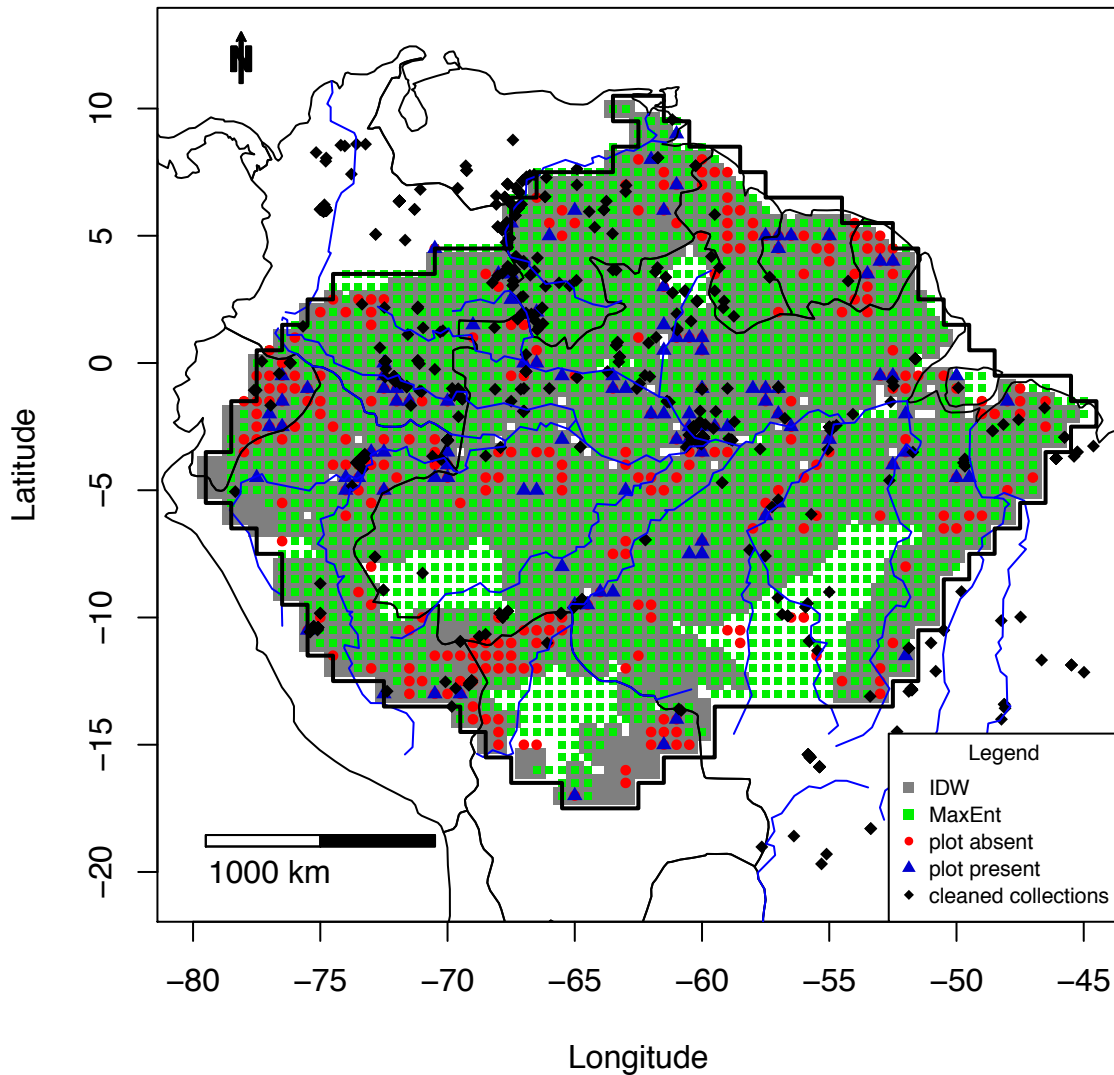

Figure S3\_84B MaxEnt map of *Licania apetala*

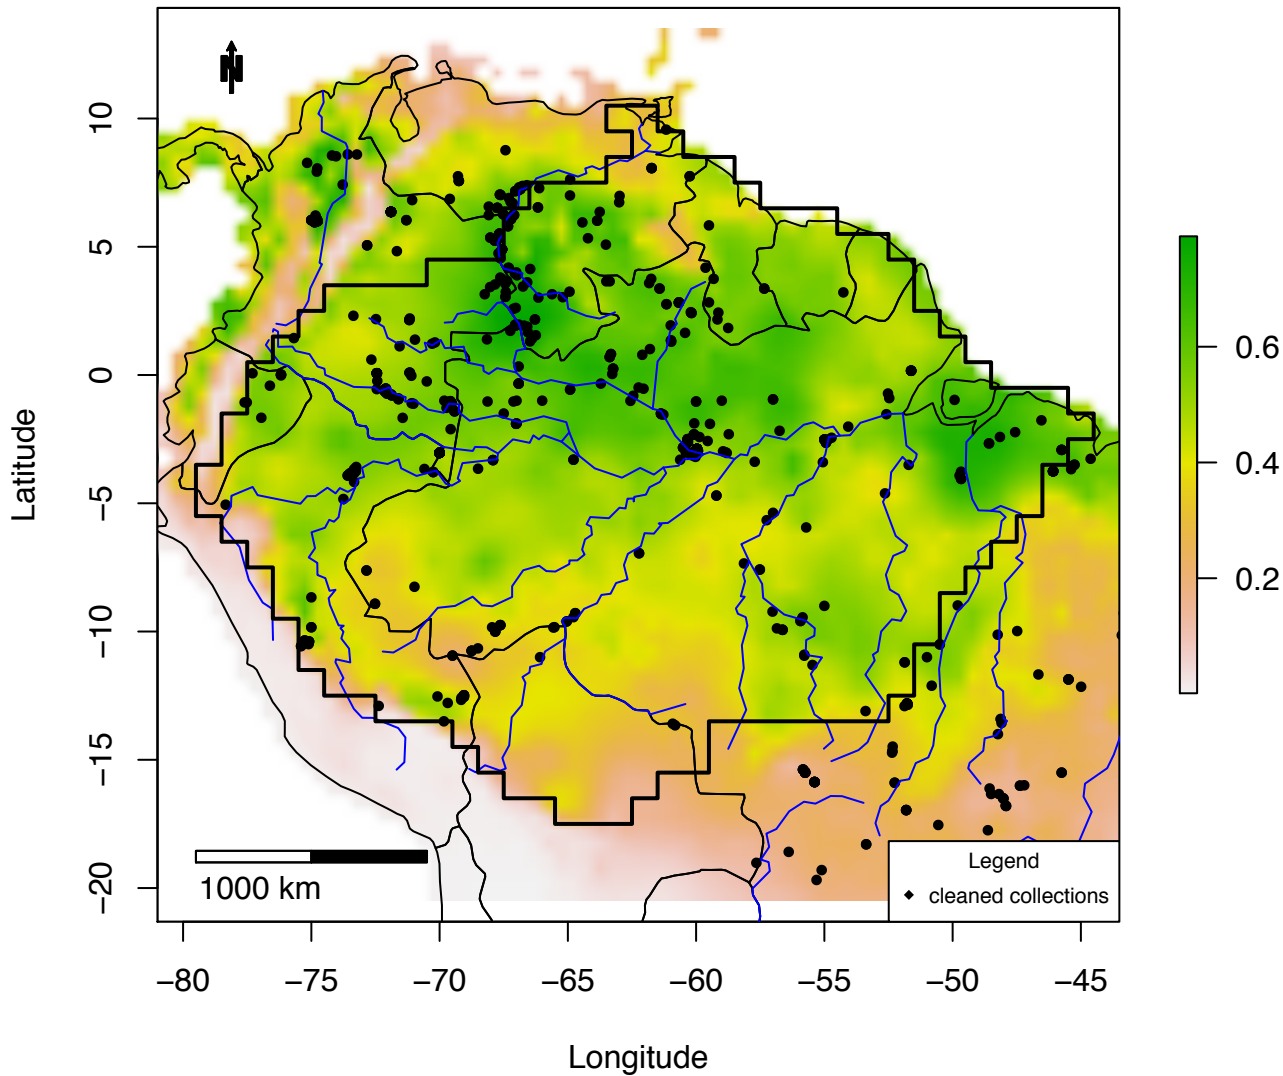

**Figure S3\_84C IDW map of *Licania apetala*:**  
plots =0 – 0.44; IDW: 0 – 0.08

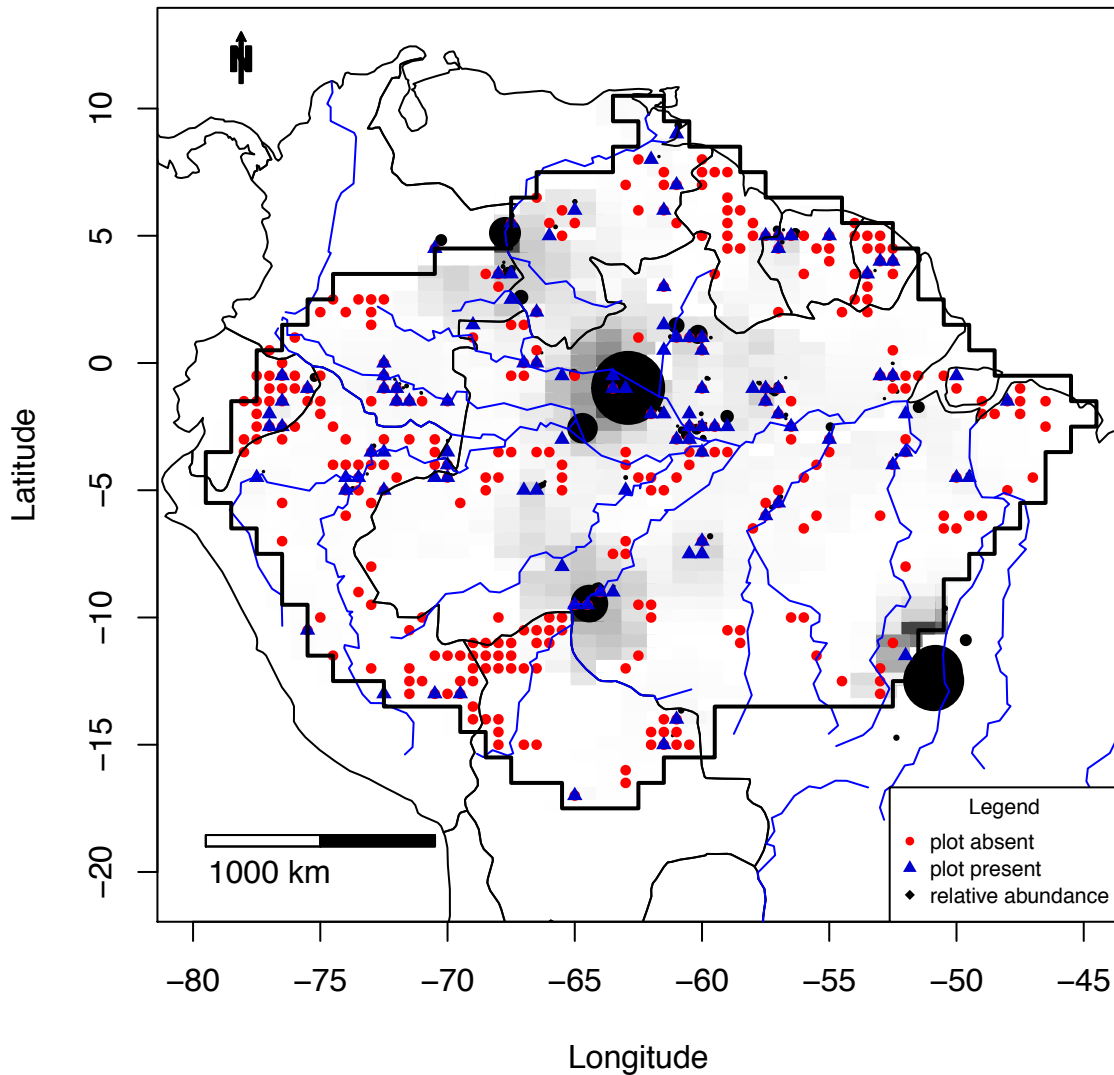

Figure S3\_85A Combined map of *Licania densiflora*

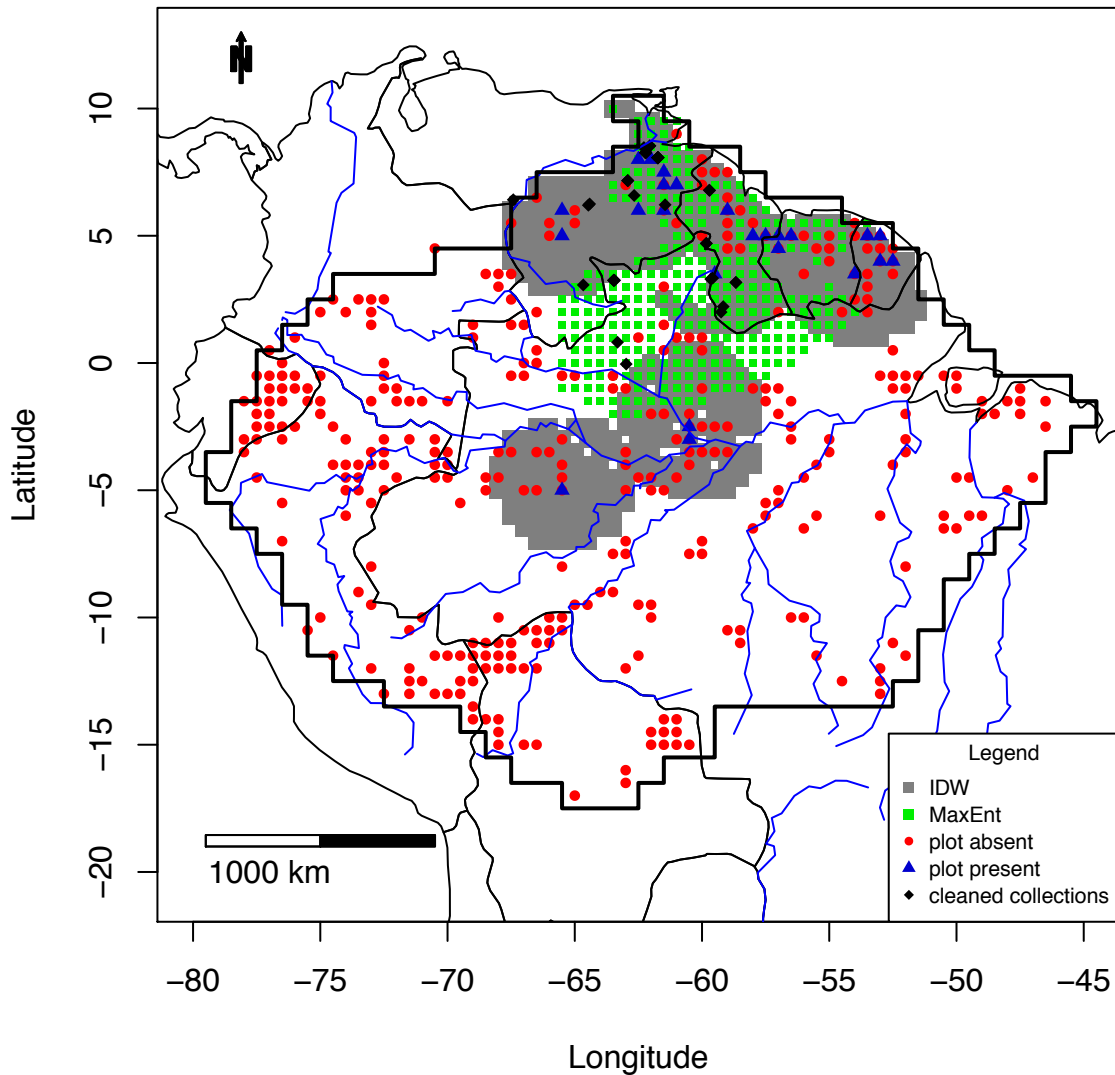

Figure S3\_85B MaxEnt map of *Licania\_densiflora*

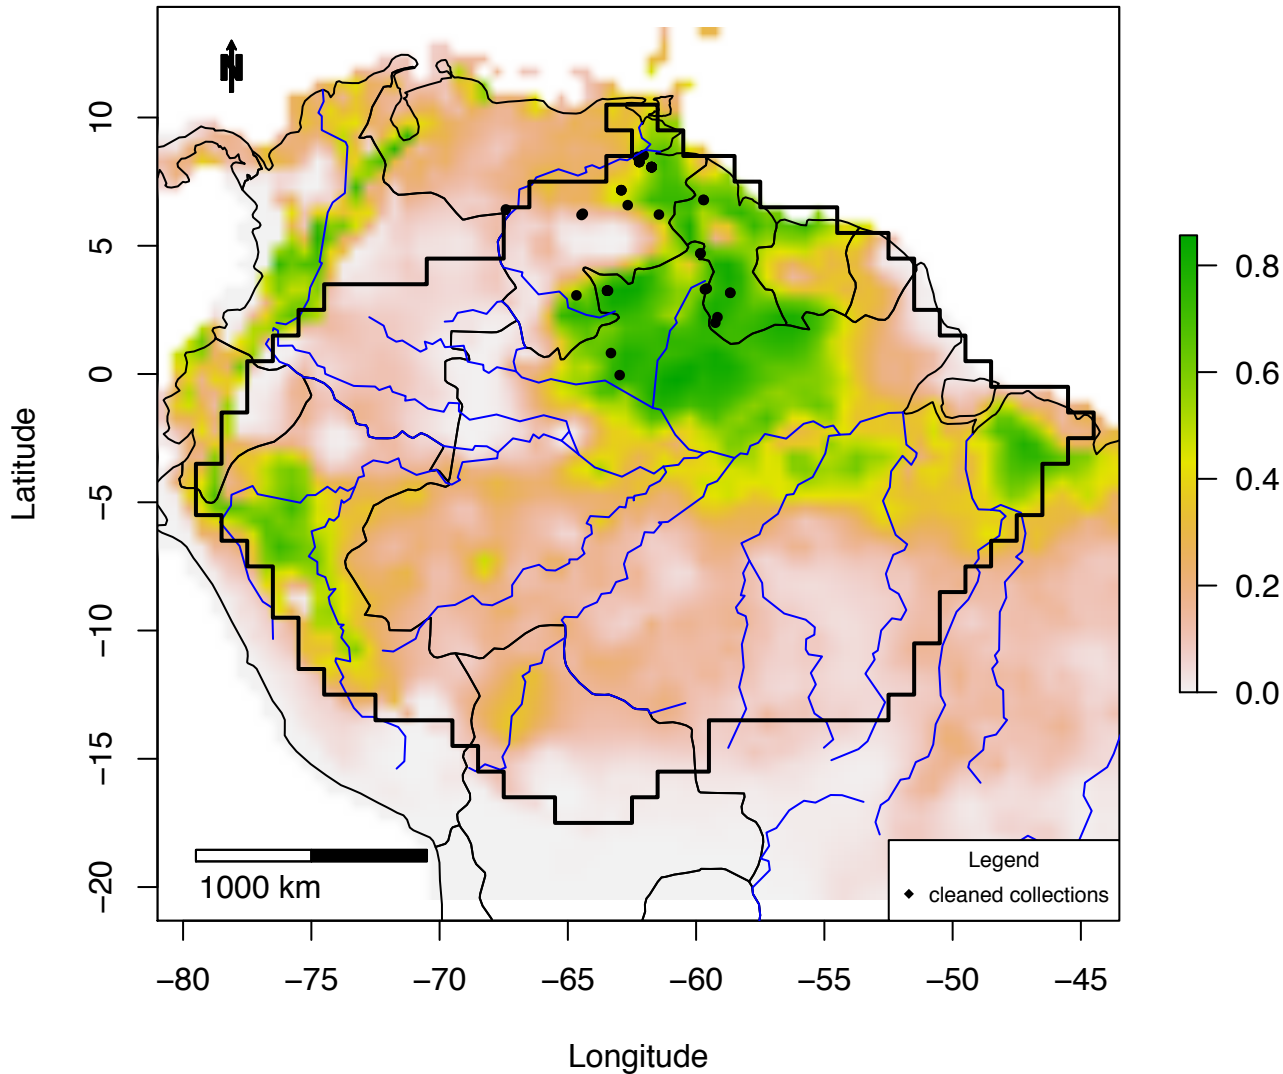

Figure S3\_85C IDW map of *Licania densiflora*:  
plots =0 – 0.45; IDW: 0 – 0.07

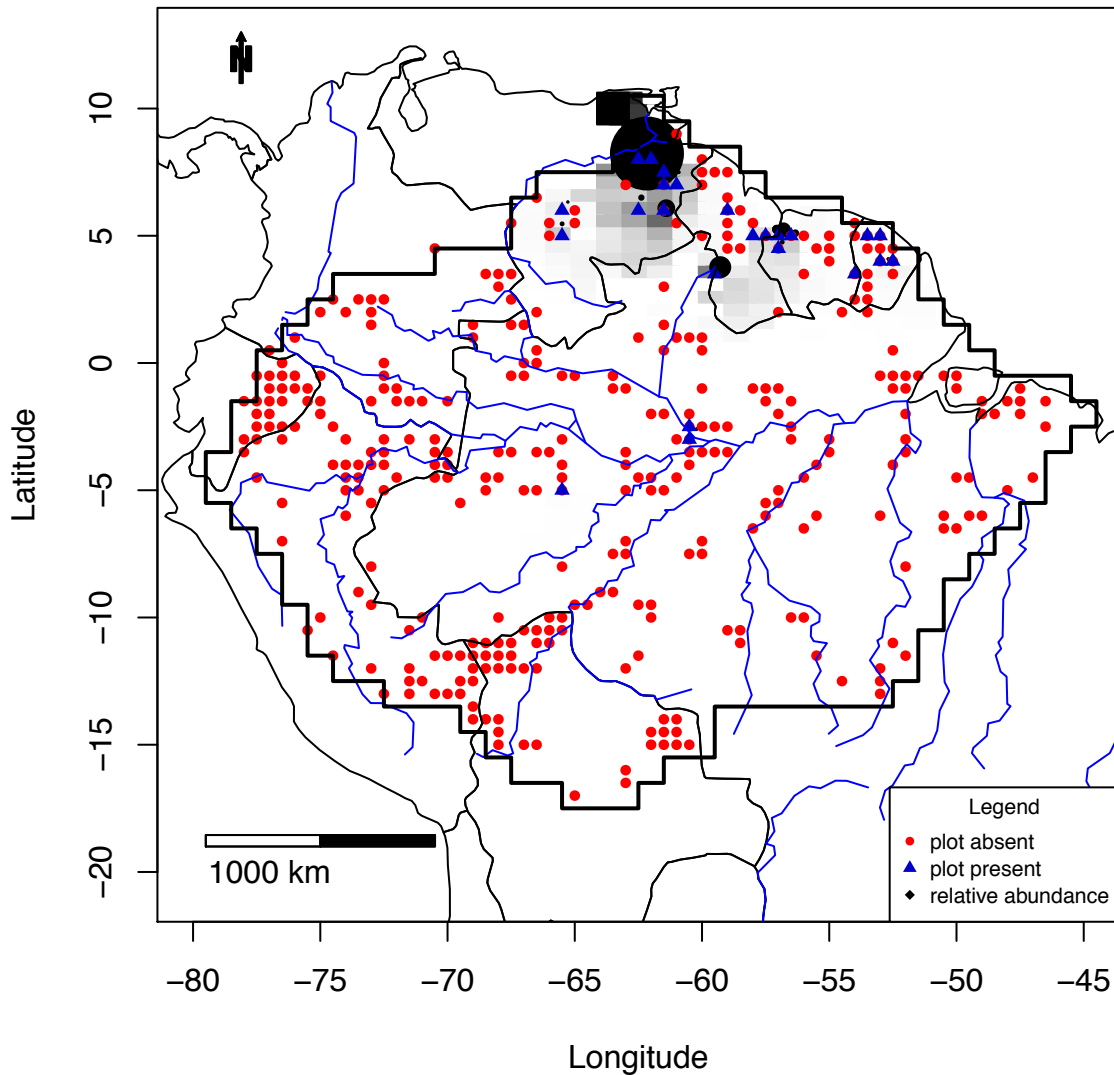



Figure S3\_86A Combined map of *Licania\_heteromorpha*

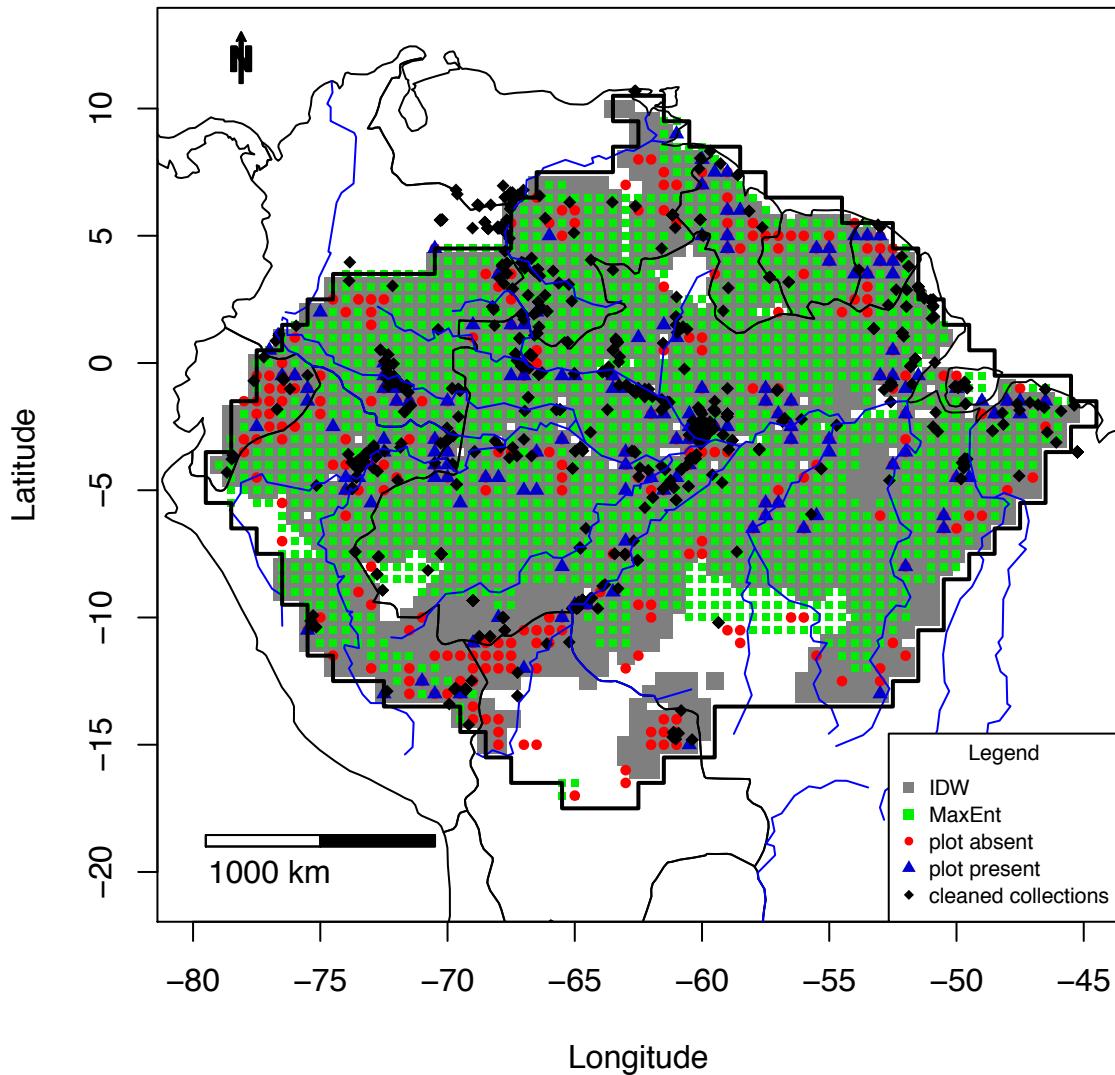

Figure S3\_86B MaxEnt map of *Licania\_heteromorpha*

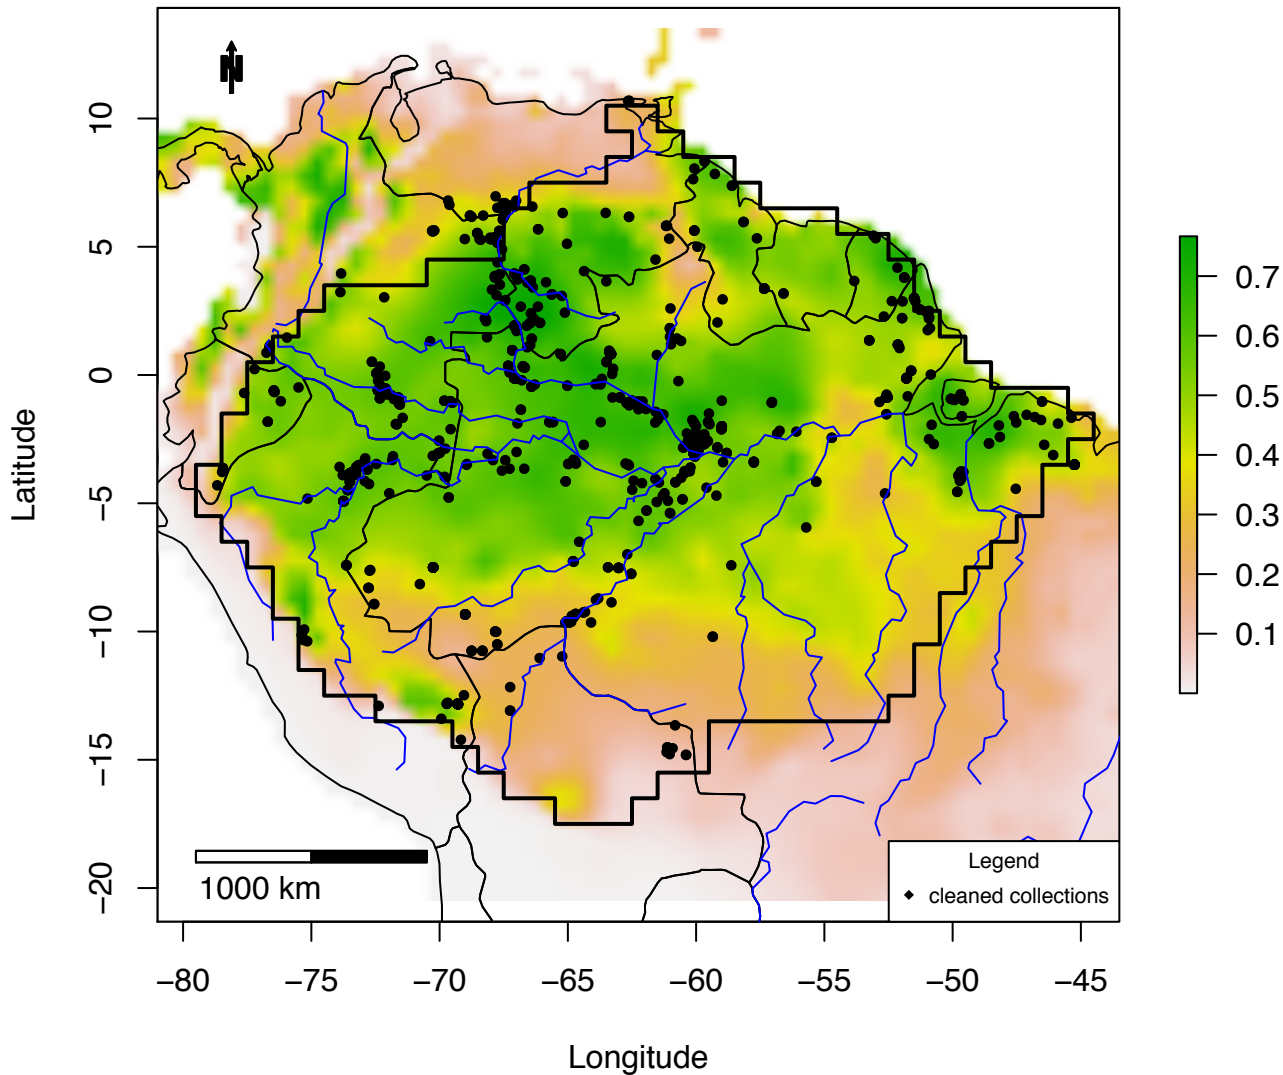

Figure S3\_86C IDW map of *Licania heteromorpha*:  
plots =0 – 0.28; IDW: 0 – 0.08

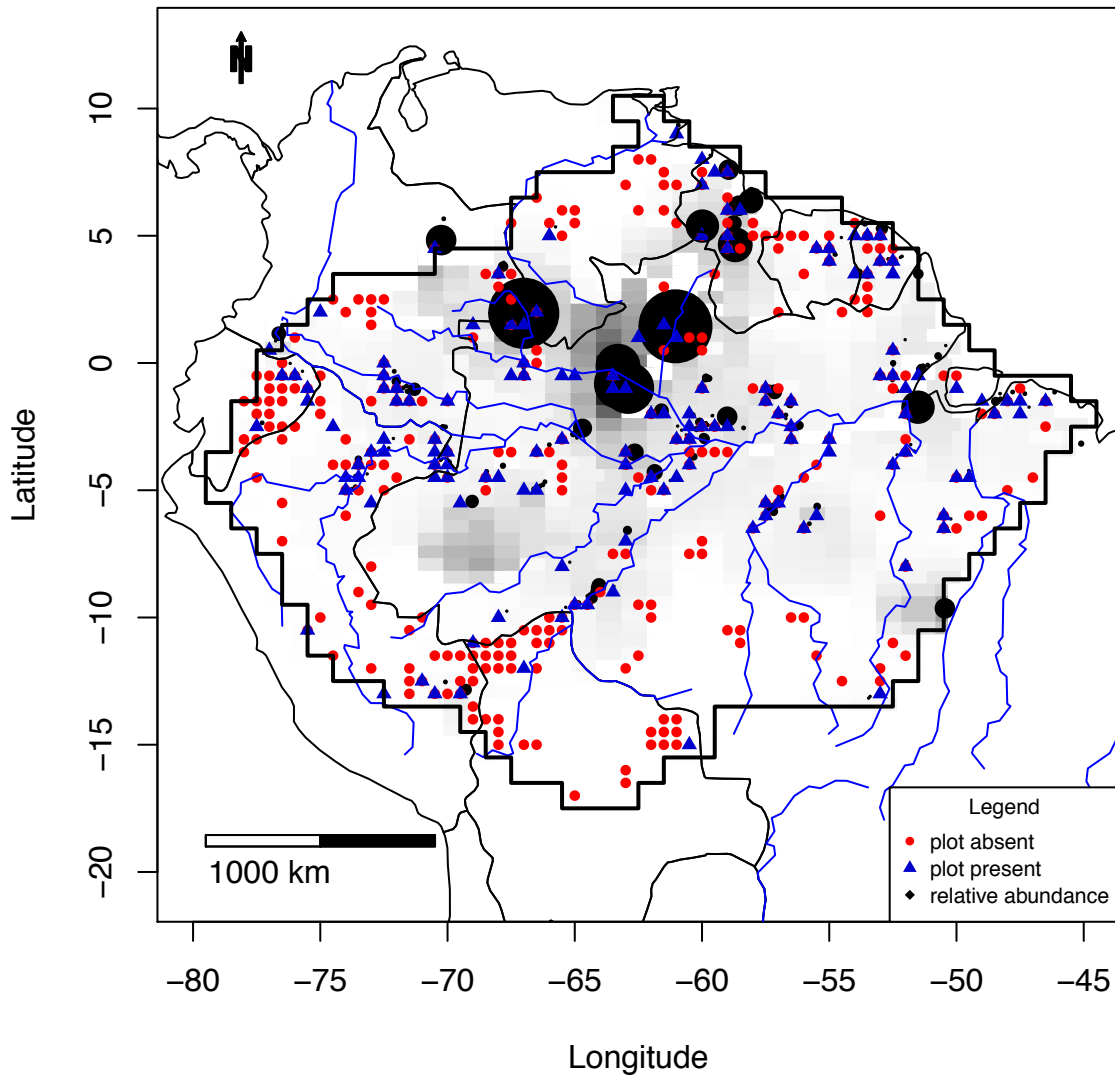

Figure S3\_87A Combined map of *Licania micrantha*

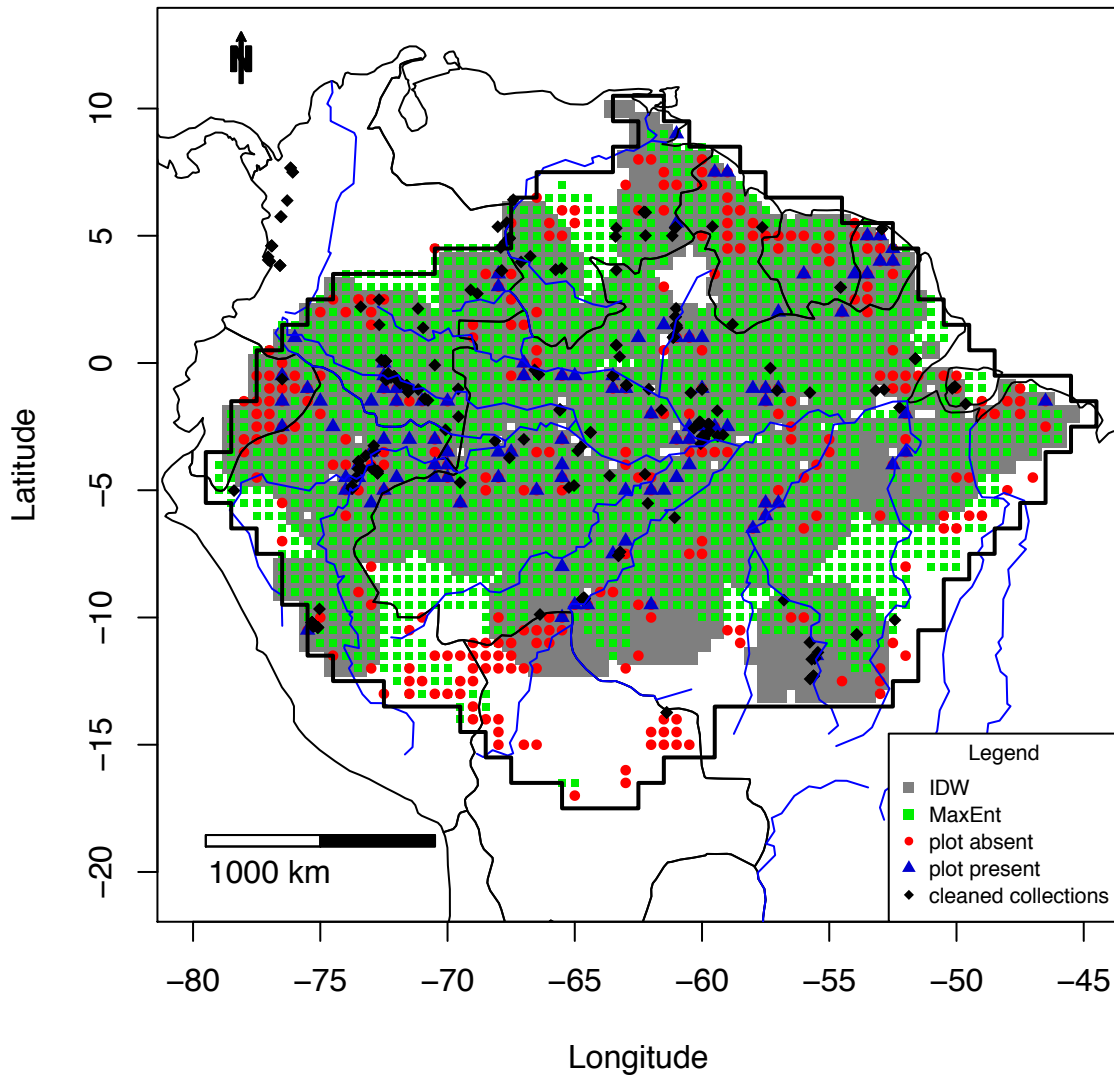

Figure S3\_87B MaxEnt map of *Licania\_micrantha*

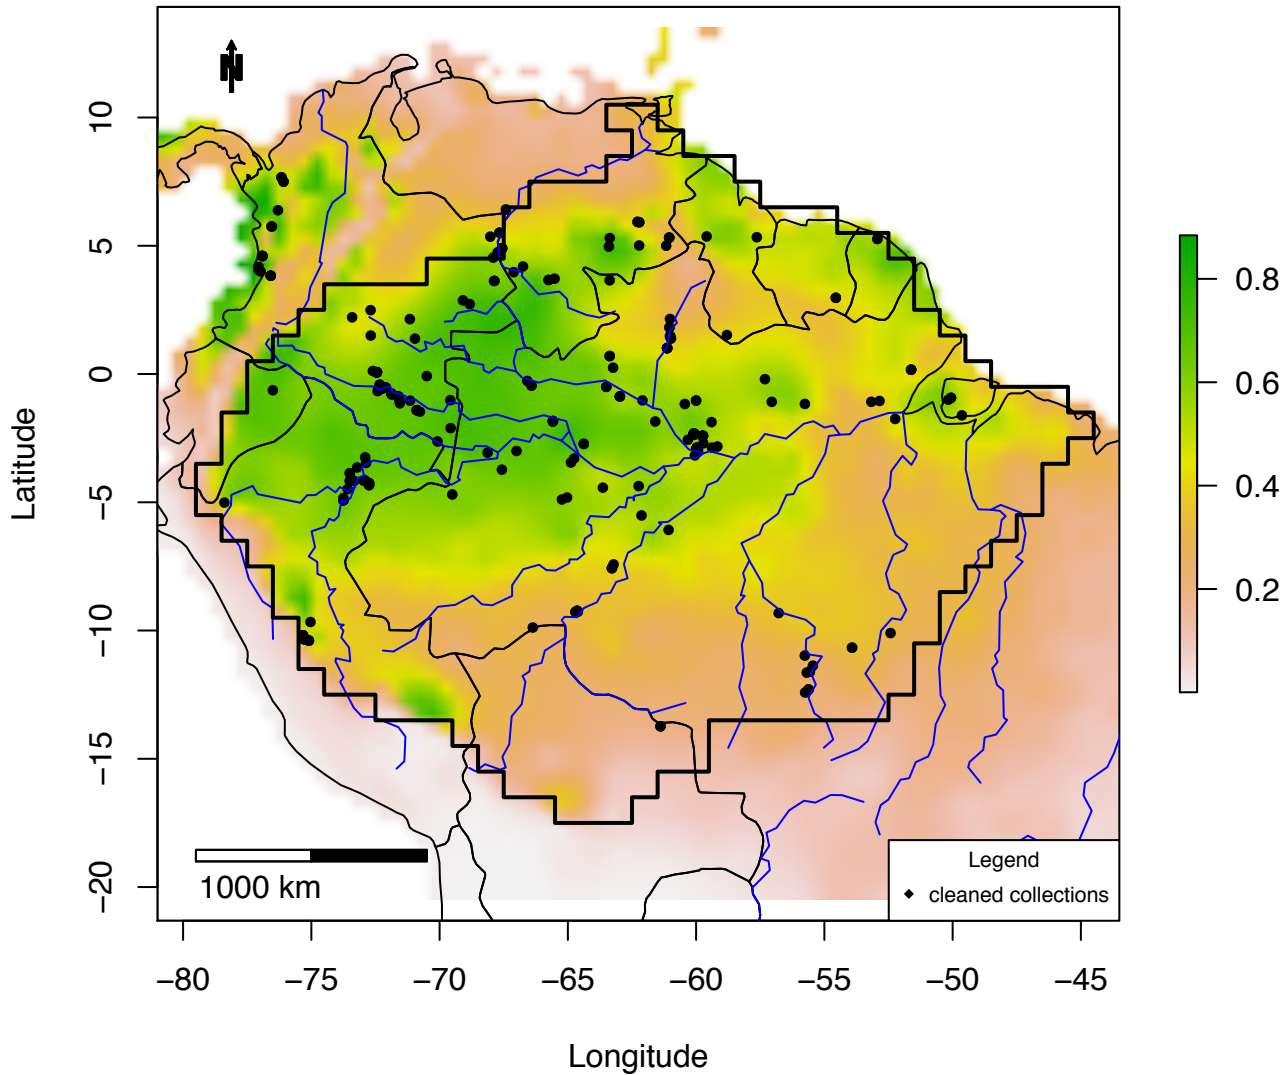

Figure S3\_87C IDW map of *Licania micrantha*:  
plots =0 – 0.26; IDW: 0 – 0.06

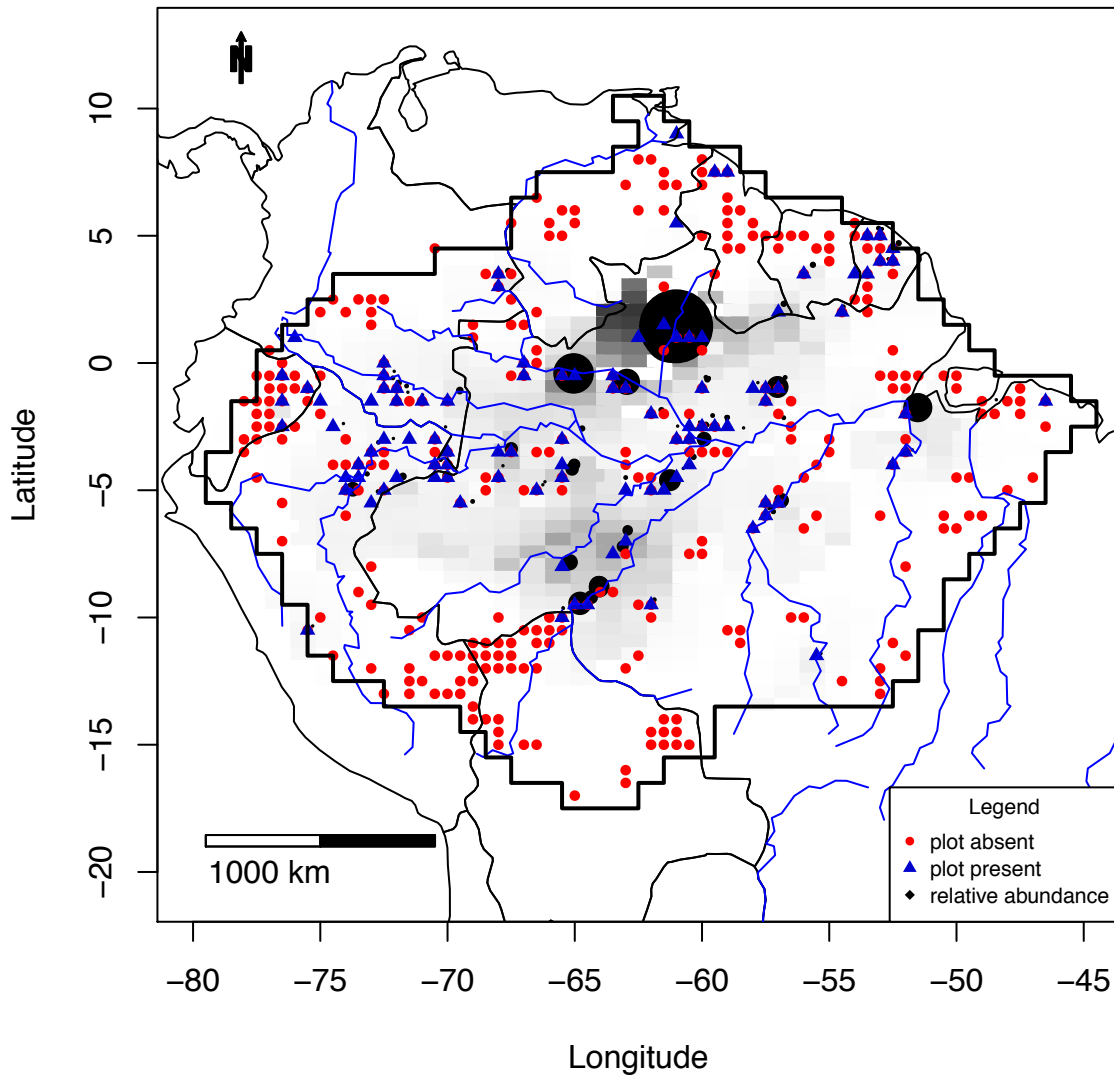

Figure S3\_88A Combined map of *Licania\_oblongifolia*

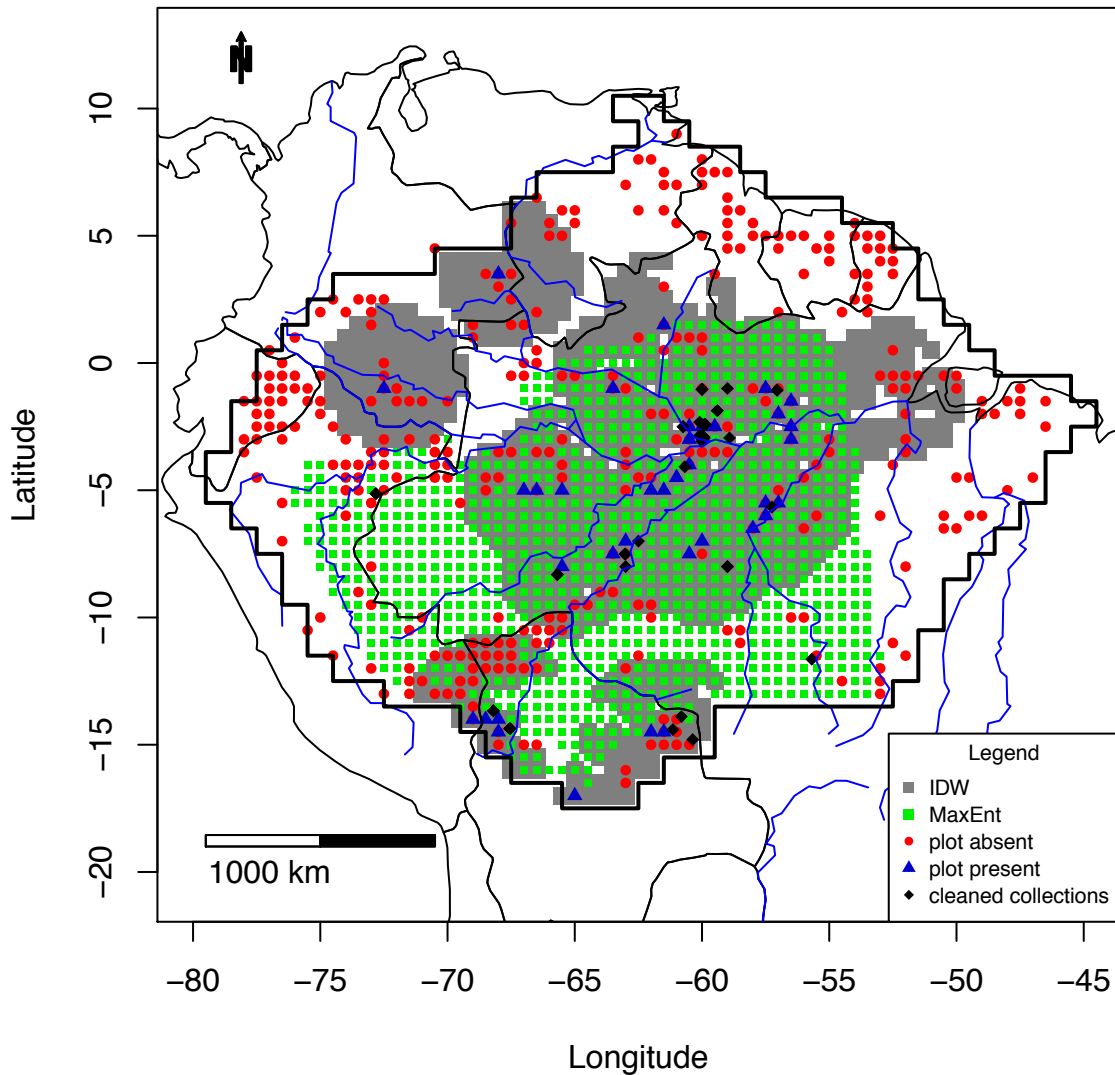

Figure S3\_88B MaxEnt map of *Licania\_oblongifolia*

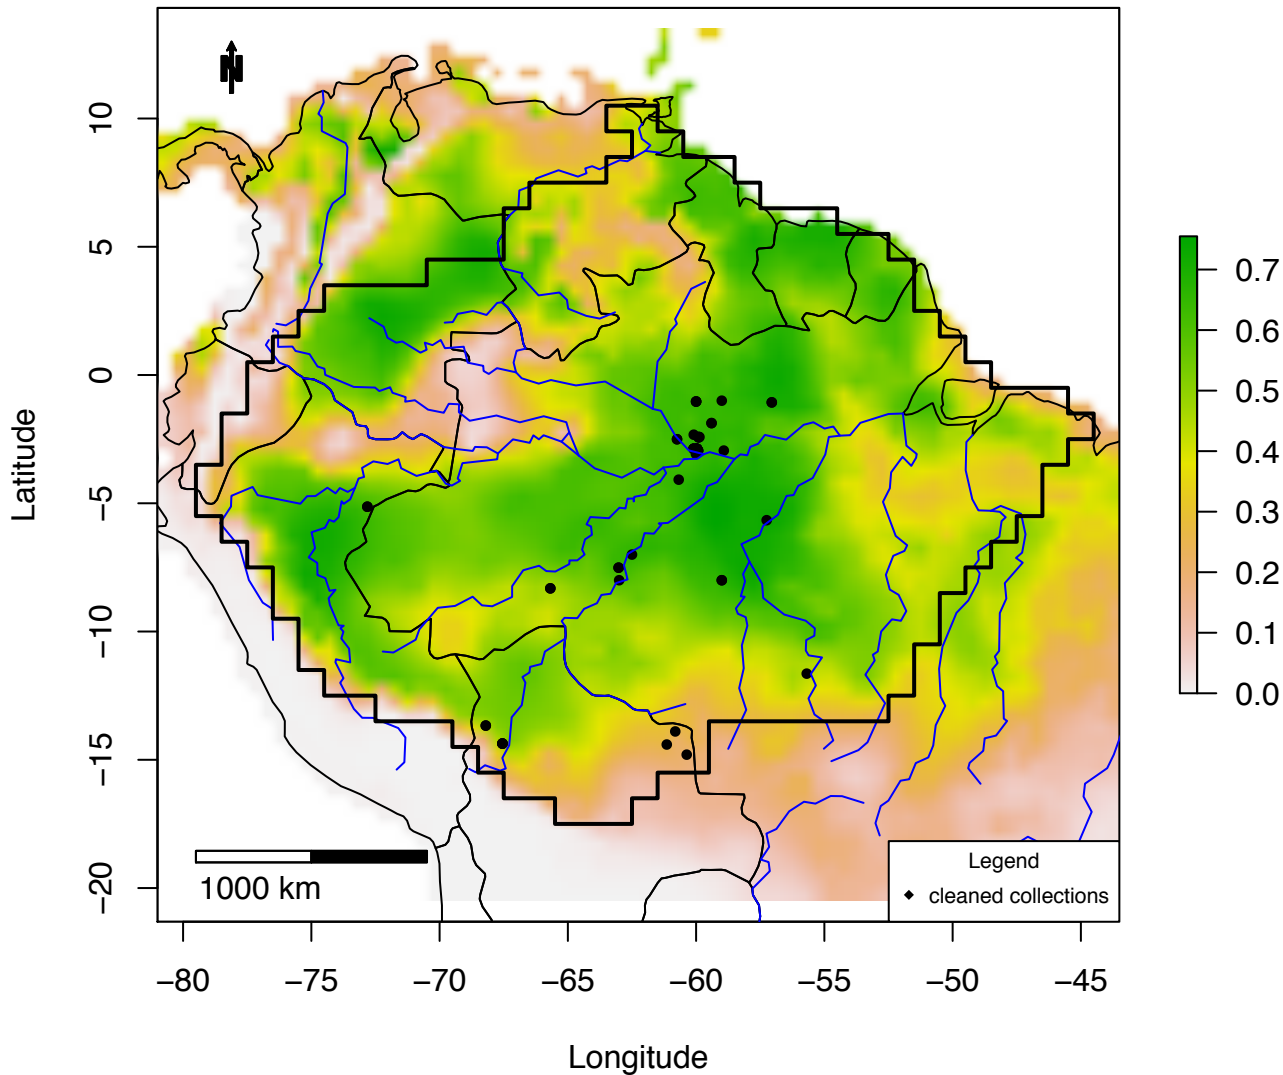



**Figure S3\_88C IDW map of *Licania oblongifolia*:**  
**plots =0 – 0.07; IDW: 0 – 0.03**

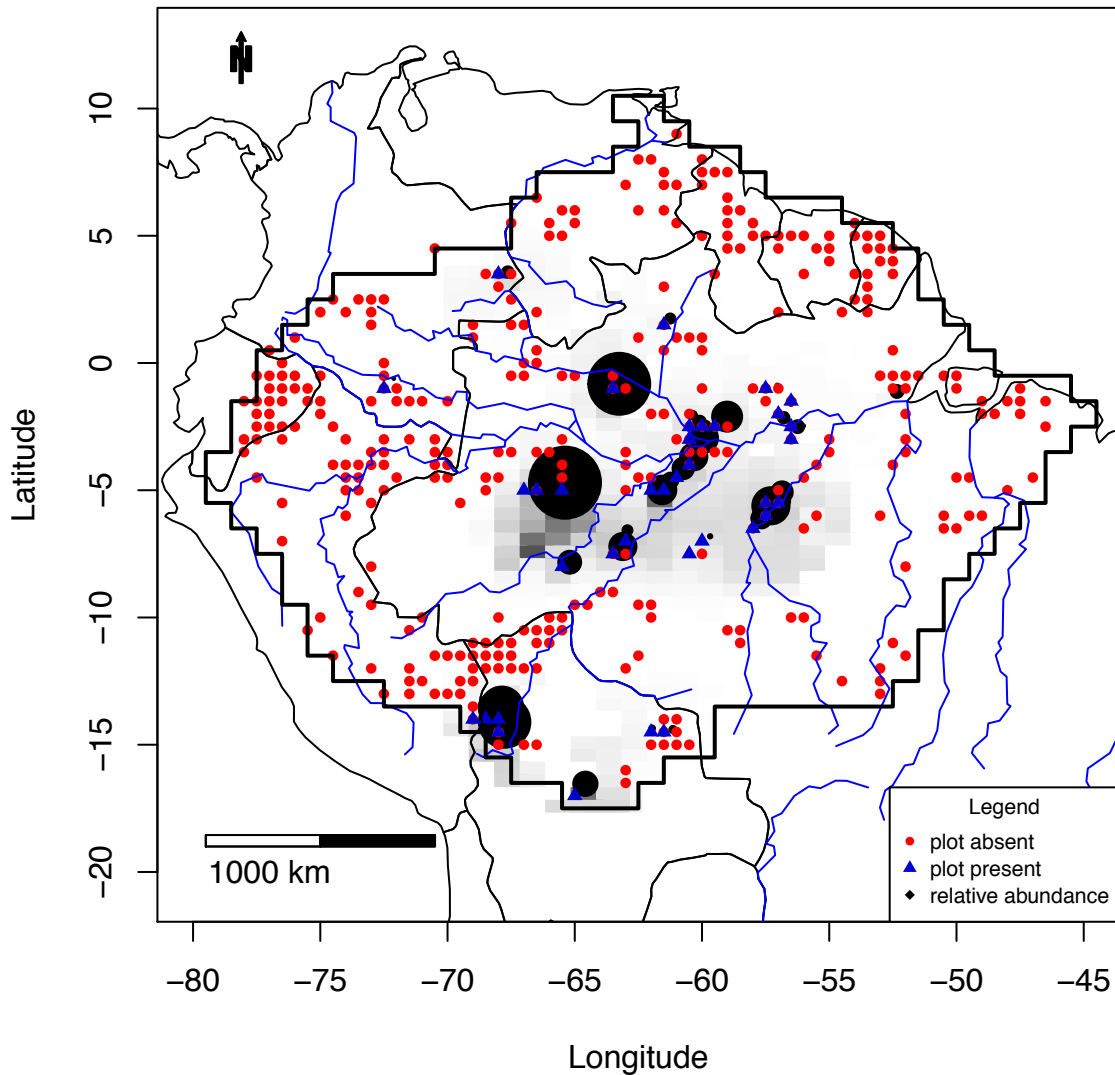

Figure S3\_89A Combined map of *Luehea\_cymulosa*

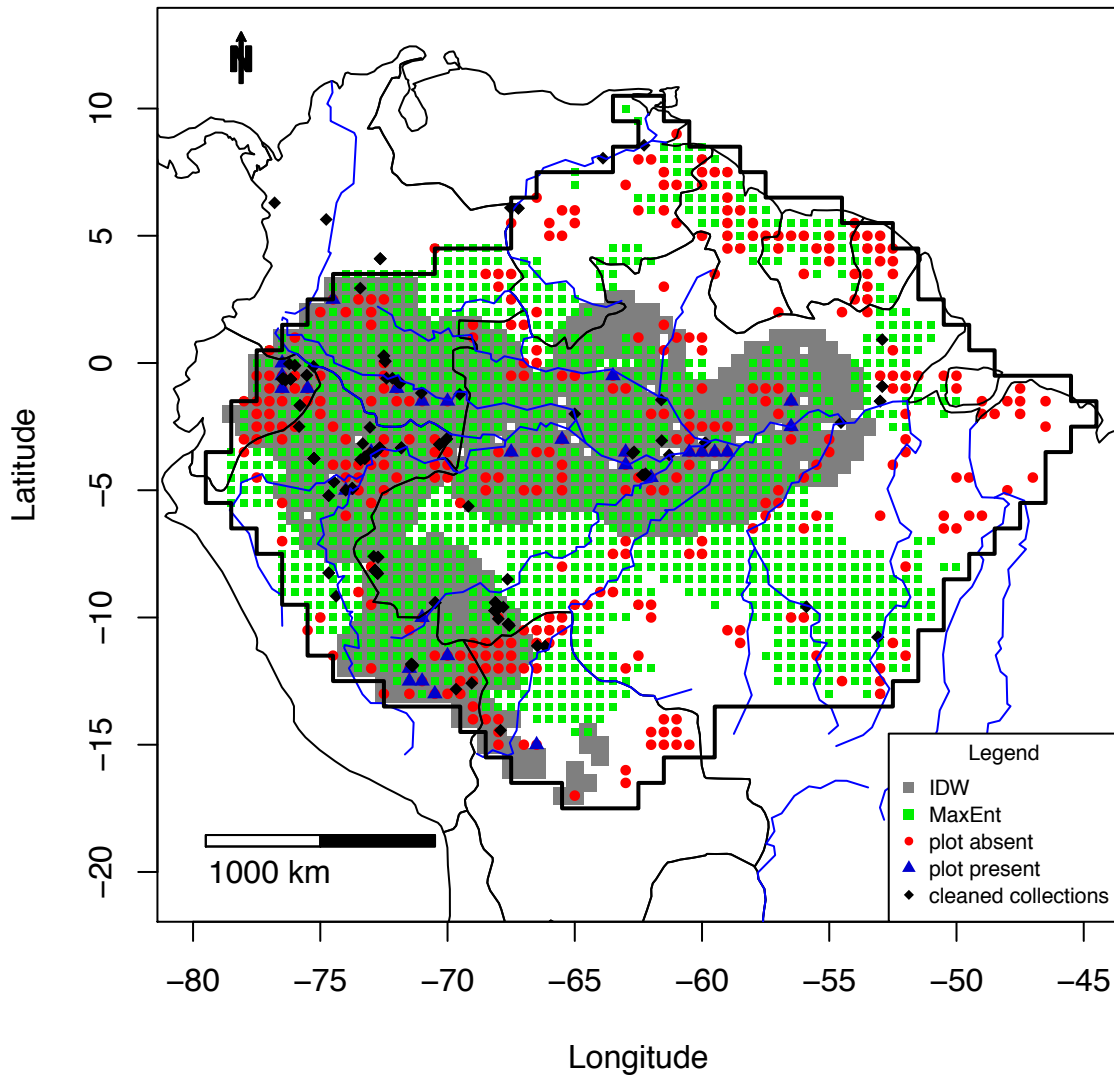

Figure S3\_89B MaxEnt map of *Luehea\_cymulosa*

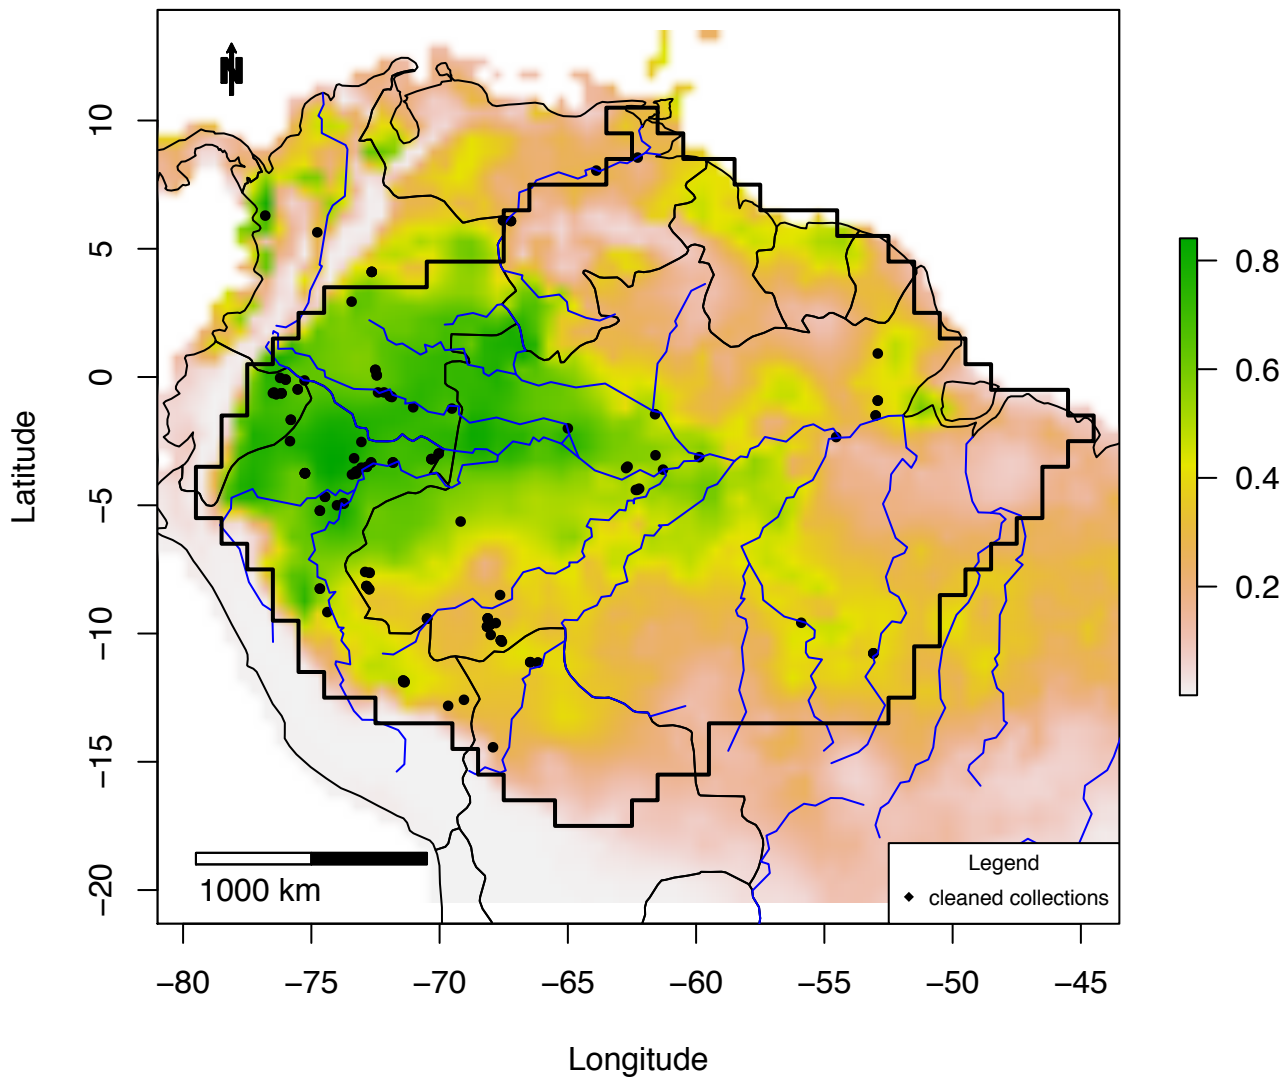

**Figure S3\_89C IDW map of *Luehea cymulosa*:**  
**plots =0 – 0.44; IDW: 0 – 0.04**

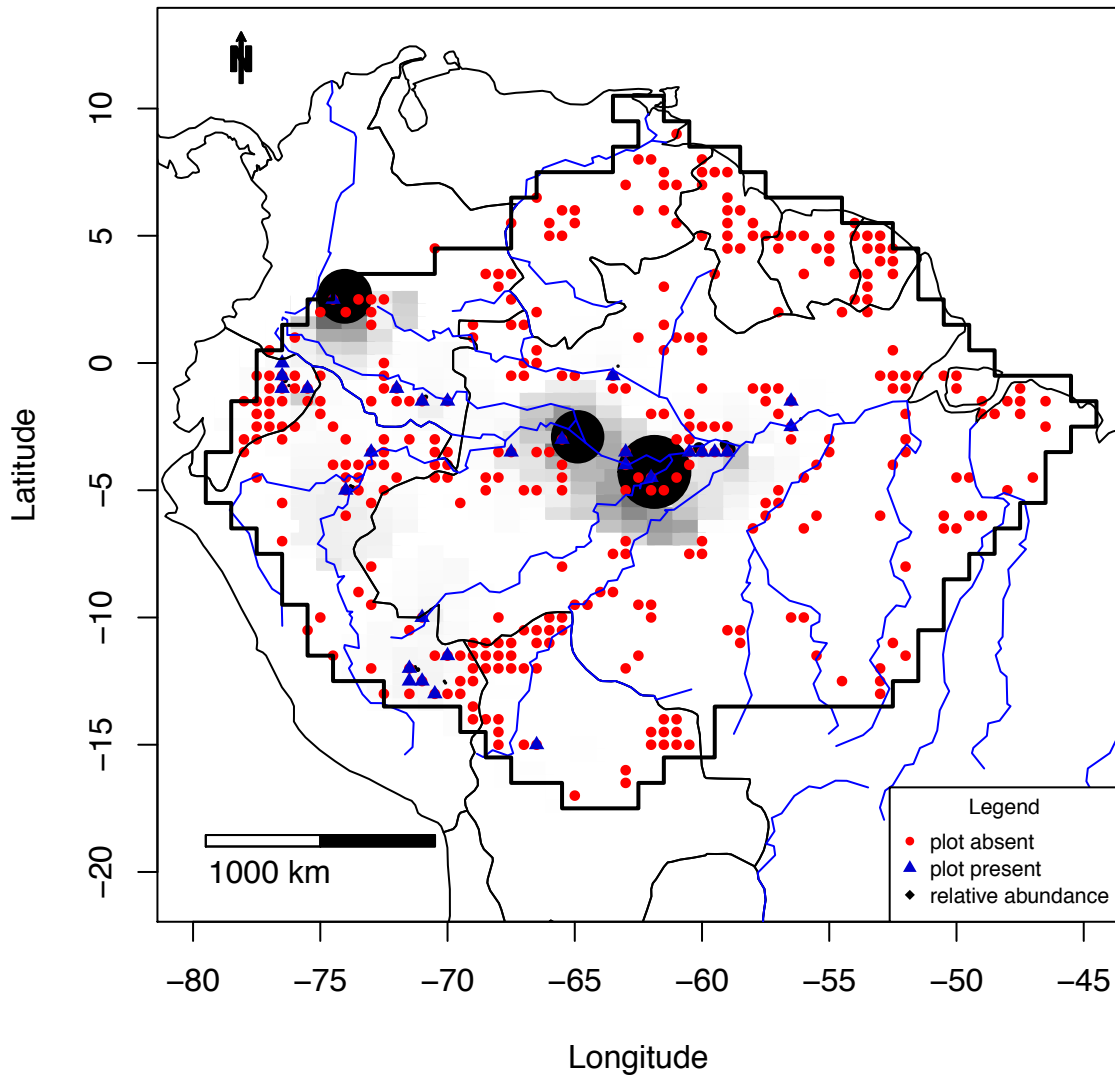

Figure S3\_90A Combined map of *Mabea nitida*

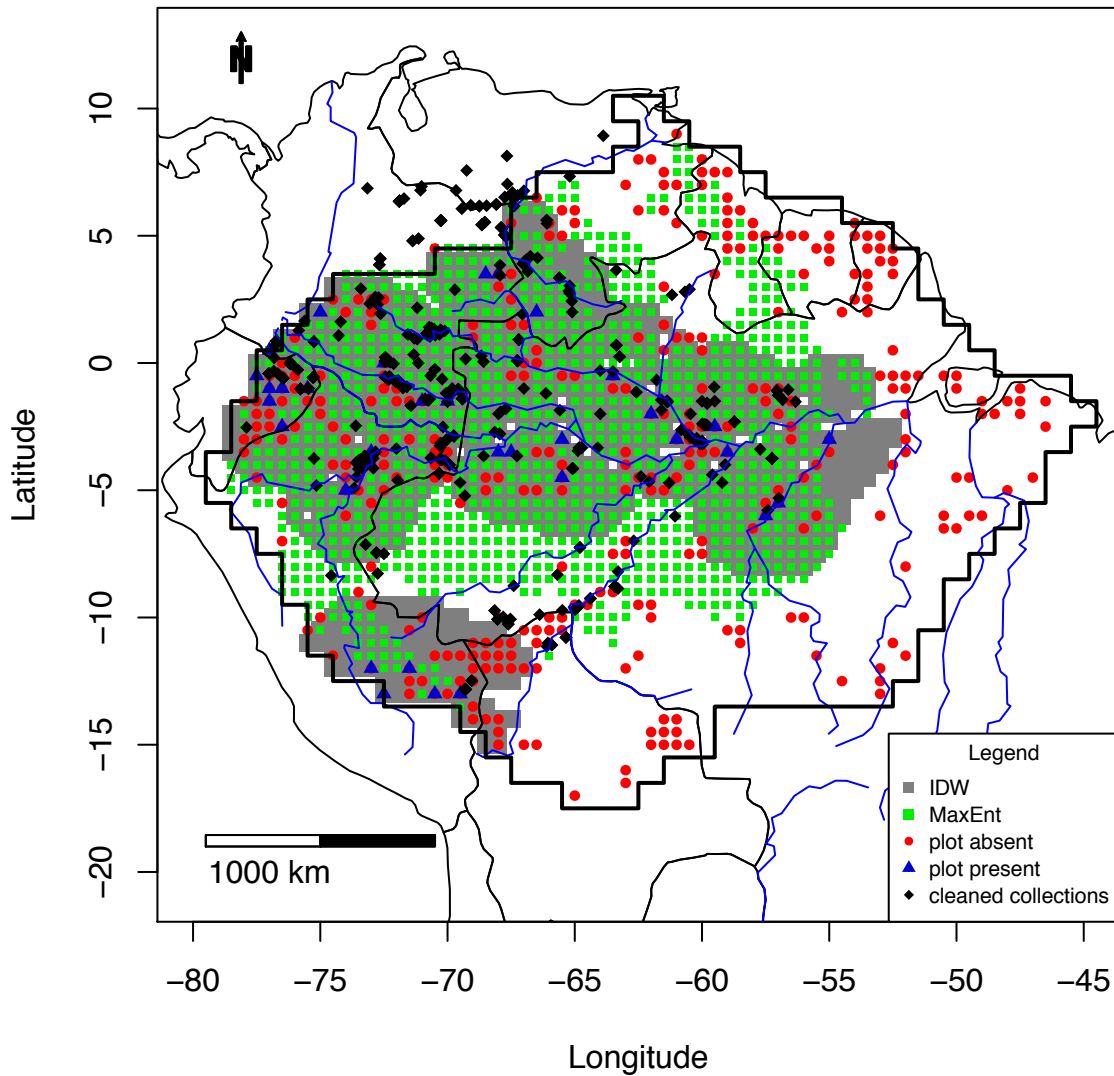

Figure S3\_90B MaxEnt map of *Mabea\_nitida*

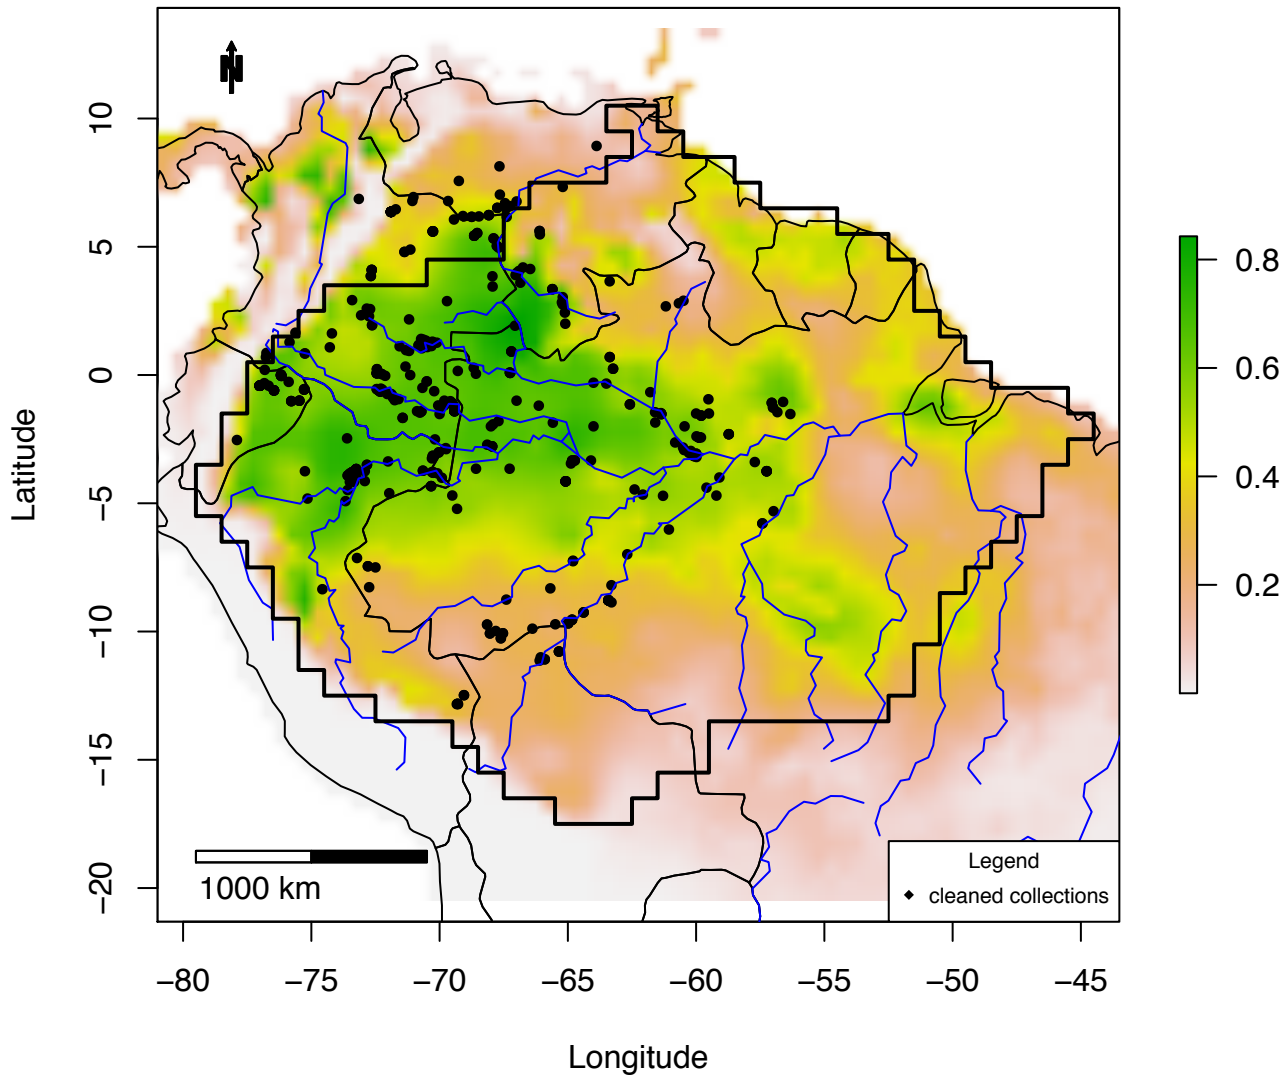

Figure S3\_90C IDW map of *Mabea nitida*:  
plots =0 – 0.19; IDW: 0 – 0.09

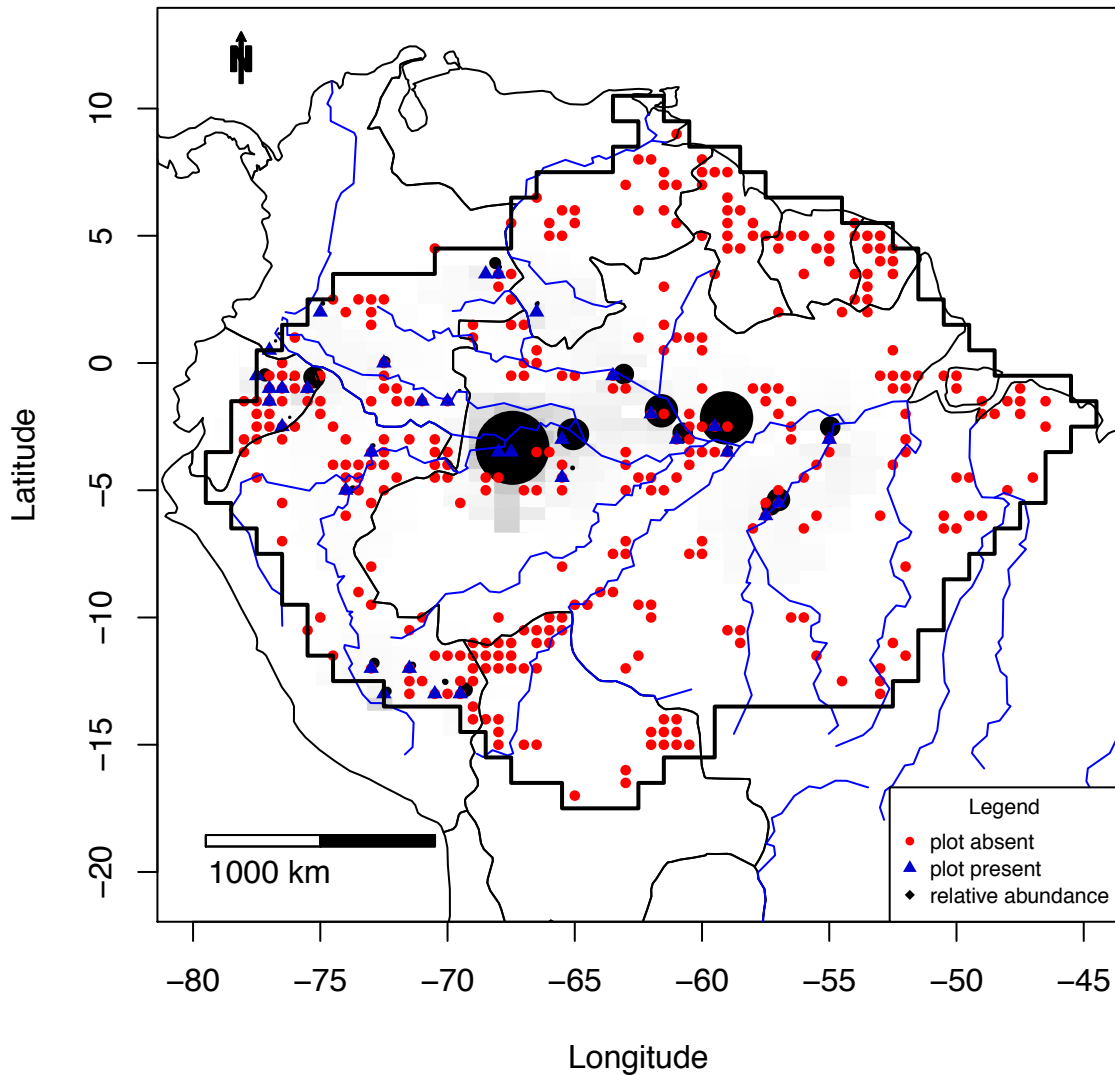

Figure S3\_91A Combined map of *Mabea speciosa*

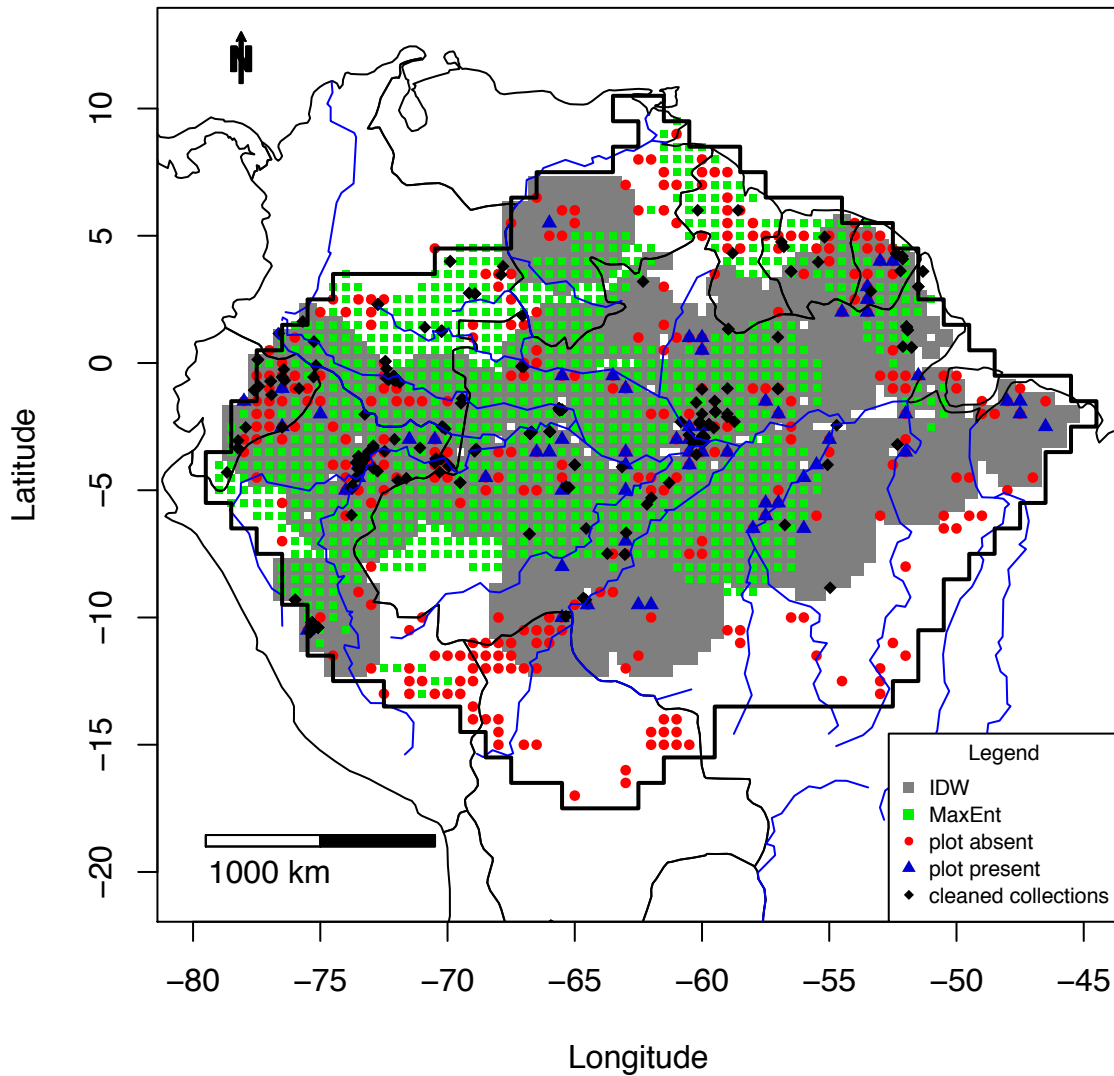



Figure S3\_91B MaxEnt map of *Mabea speciosa*

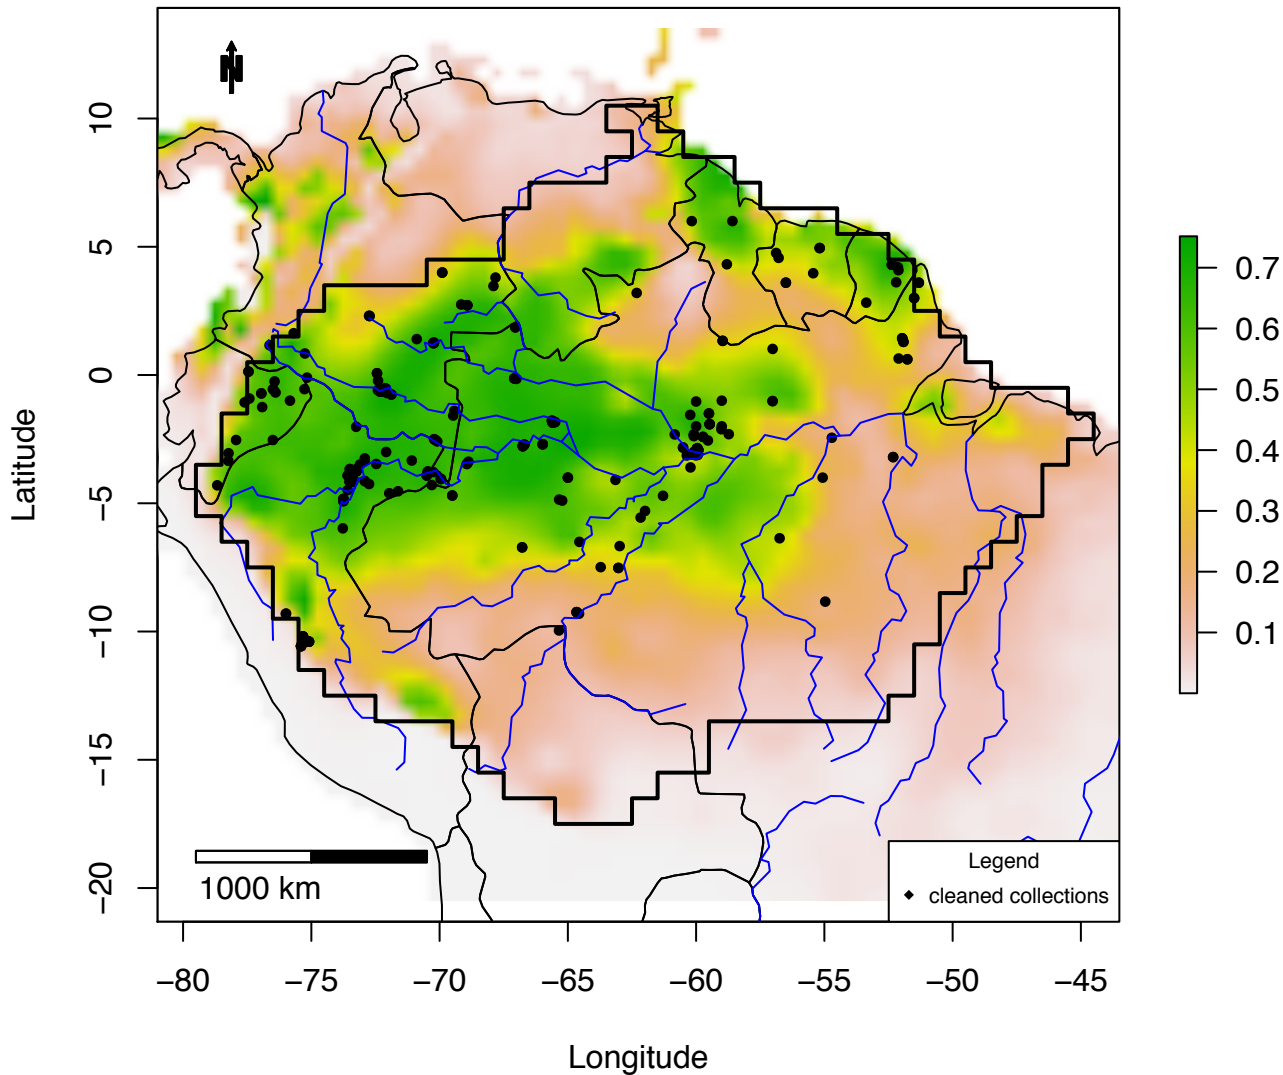

**Figure S3\_91C IDW map of *Mabea speciosa*:**  
**plots =0 – 0.33; IDW: 0 – 0.07**

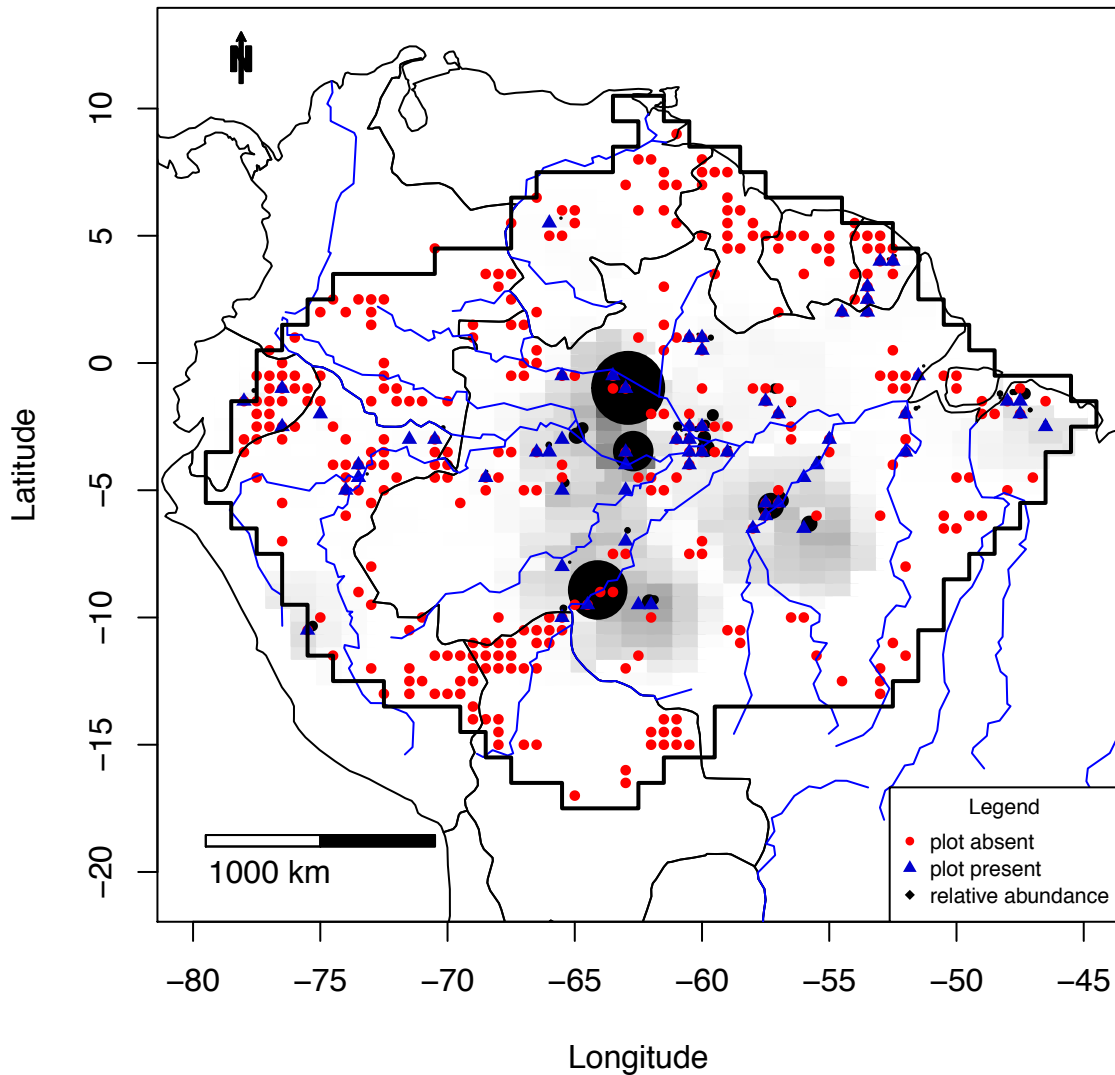

Figure S3\_92A Combined map of *Macrolobium acaciifolium*

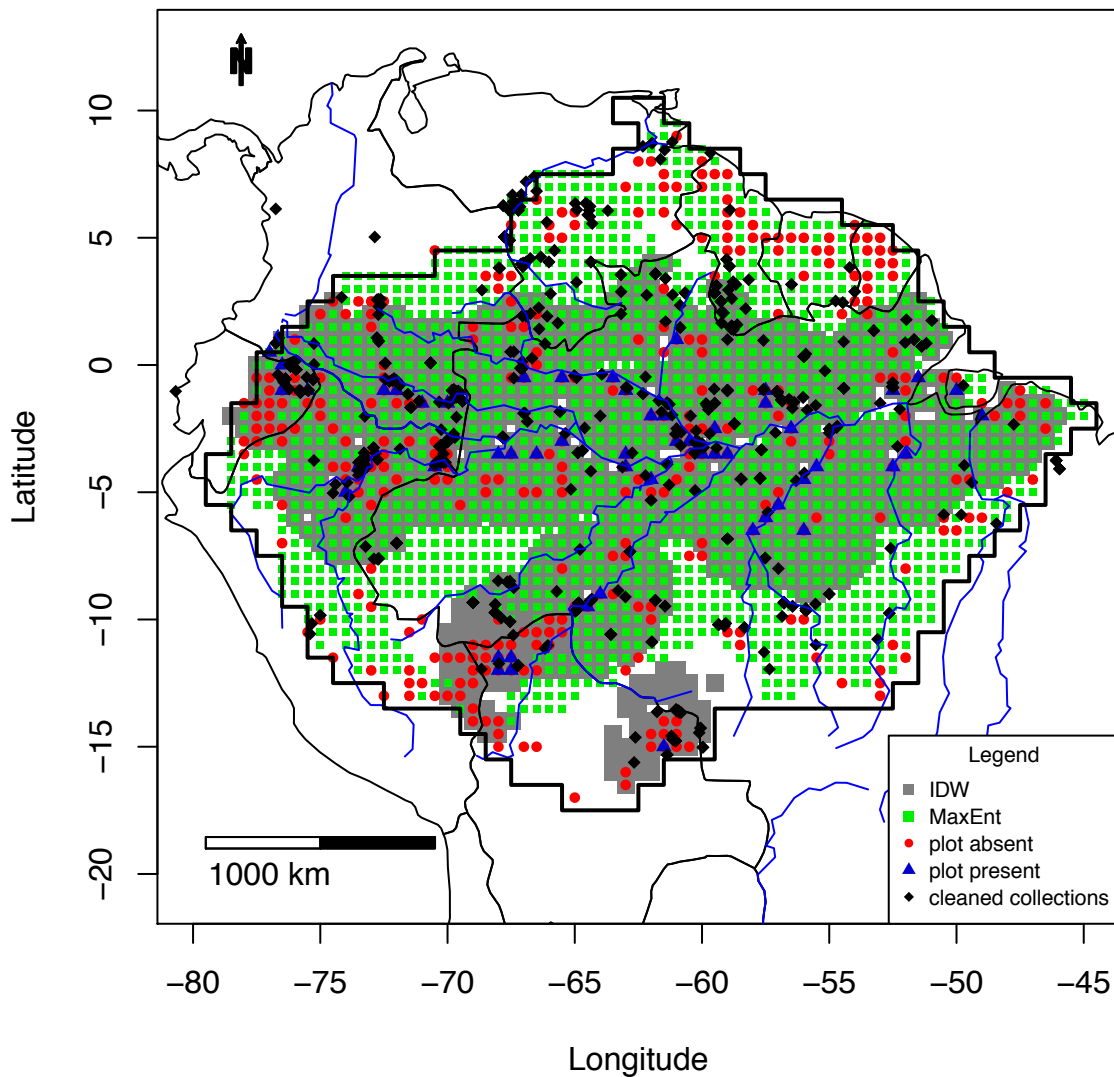

Figure S3\_92B MaxEnt map of *Macrolobium\_acaciifolium*

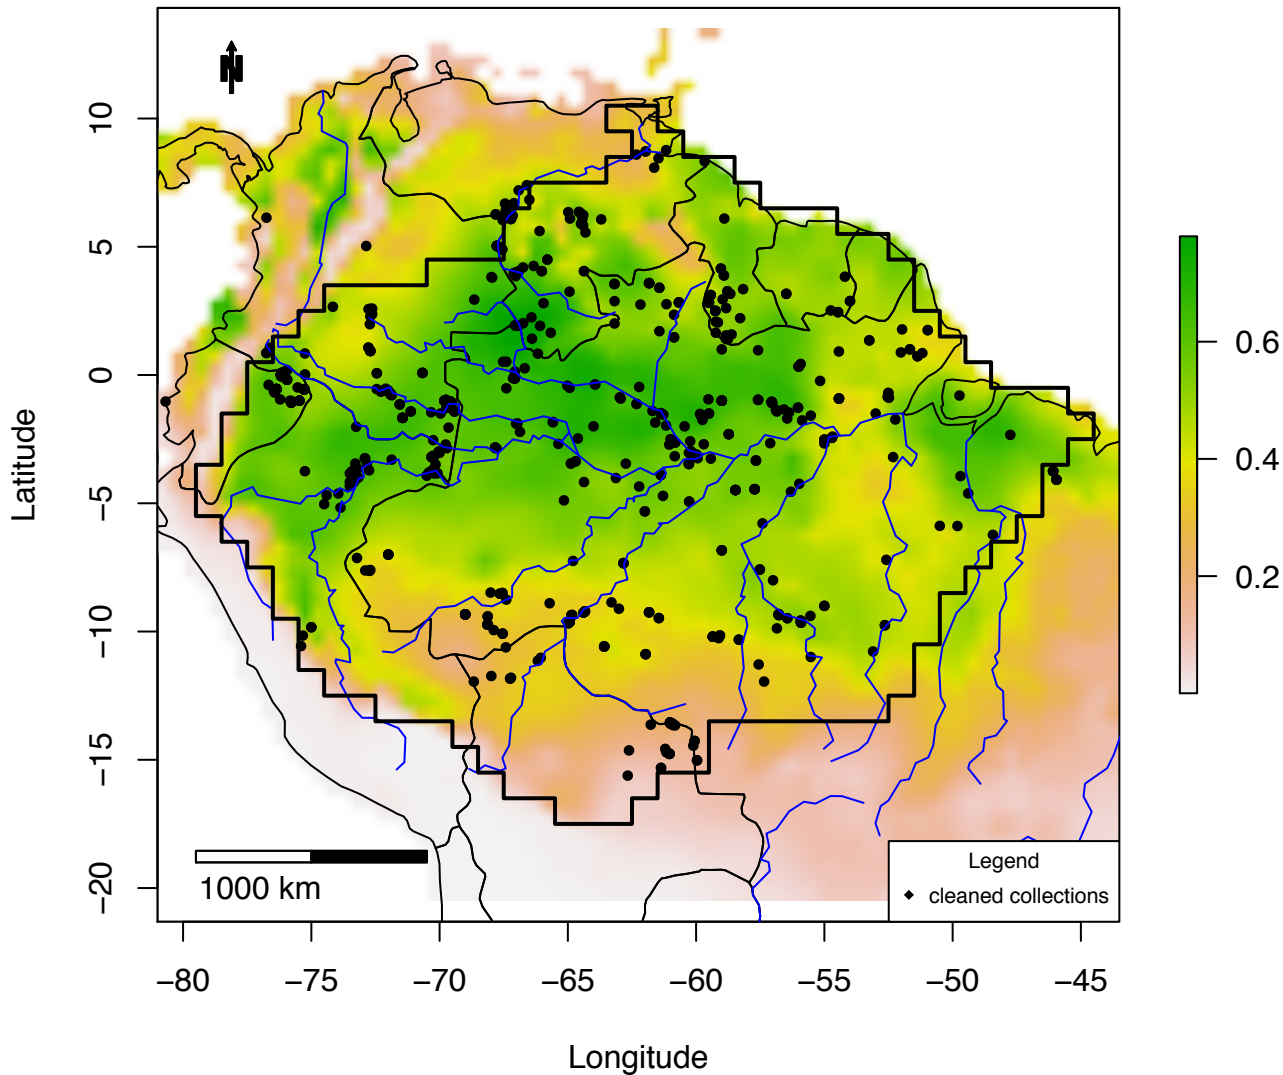

Figure S3\_92C IDW map of *Macrolobium acaciifolium*:  
plots = 0 – 0.19; IDW: 0 – 0.03

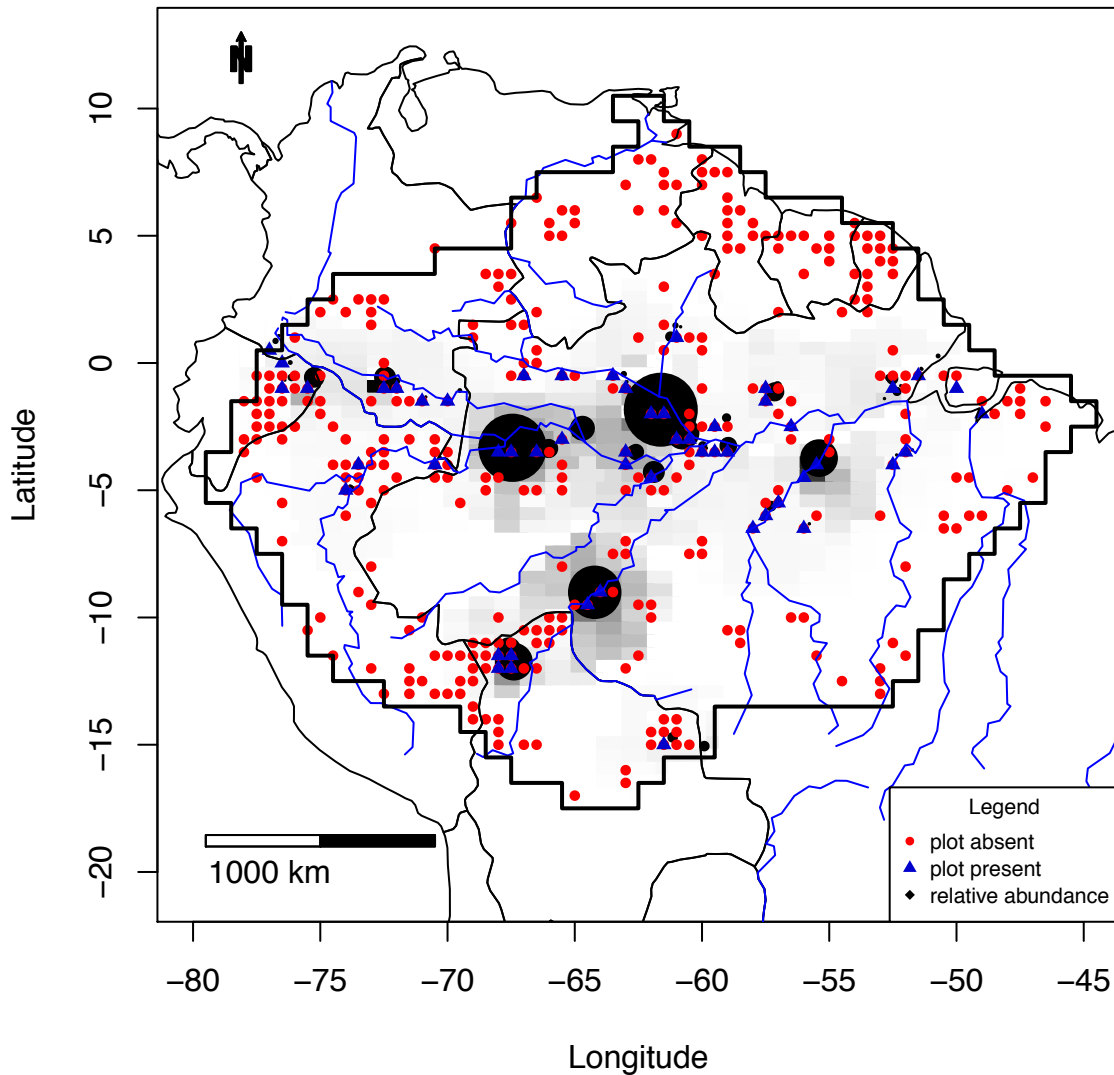

Figure S3\_93A Combined map of *Macrolobium\_angustifolium*

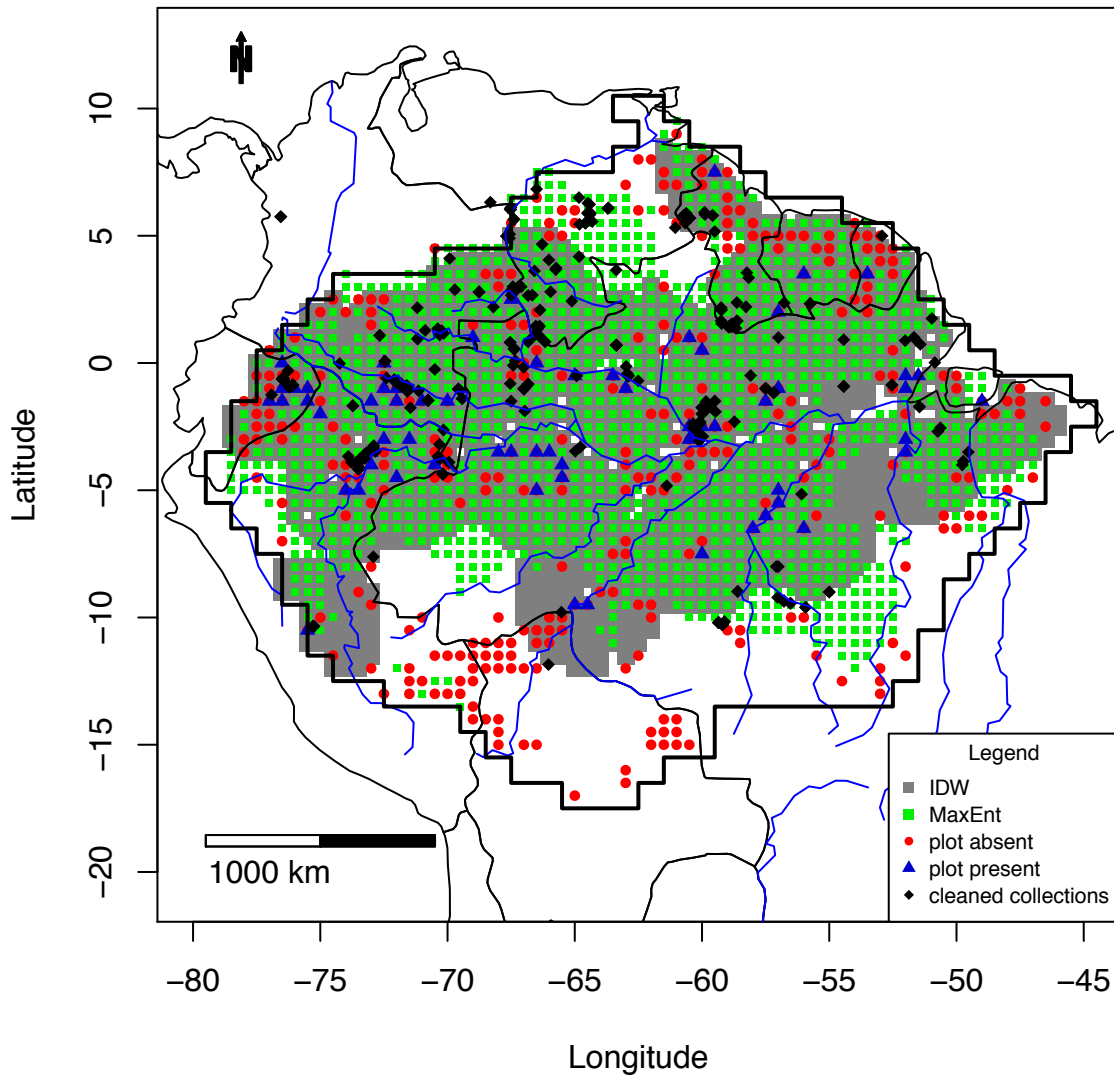

Figure S3\_93B MaxEnt map of *Macrolobium\_angustifolium*

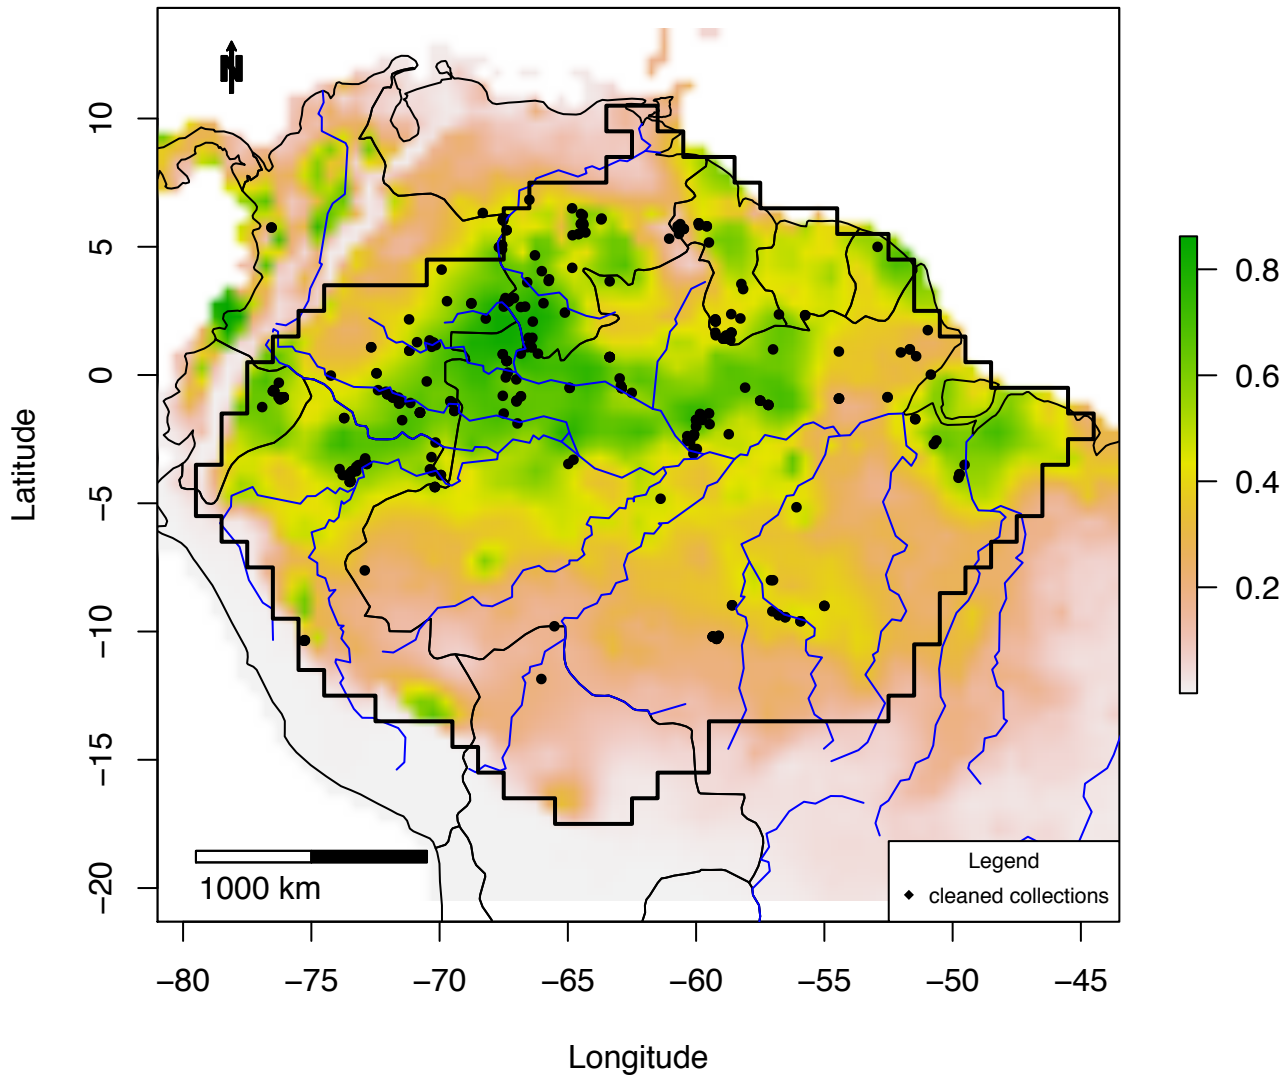

Figure S3\_93C IDW map of *Macrolobium angustifolium*:  
plots = 0 – 0.23; IDW: 0 – 0.05

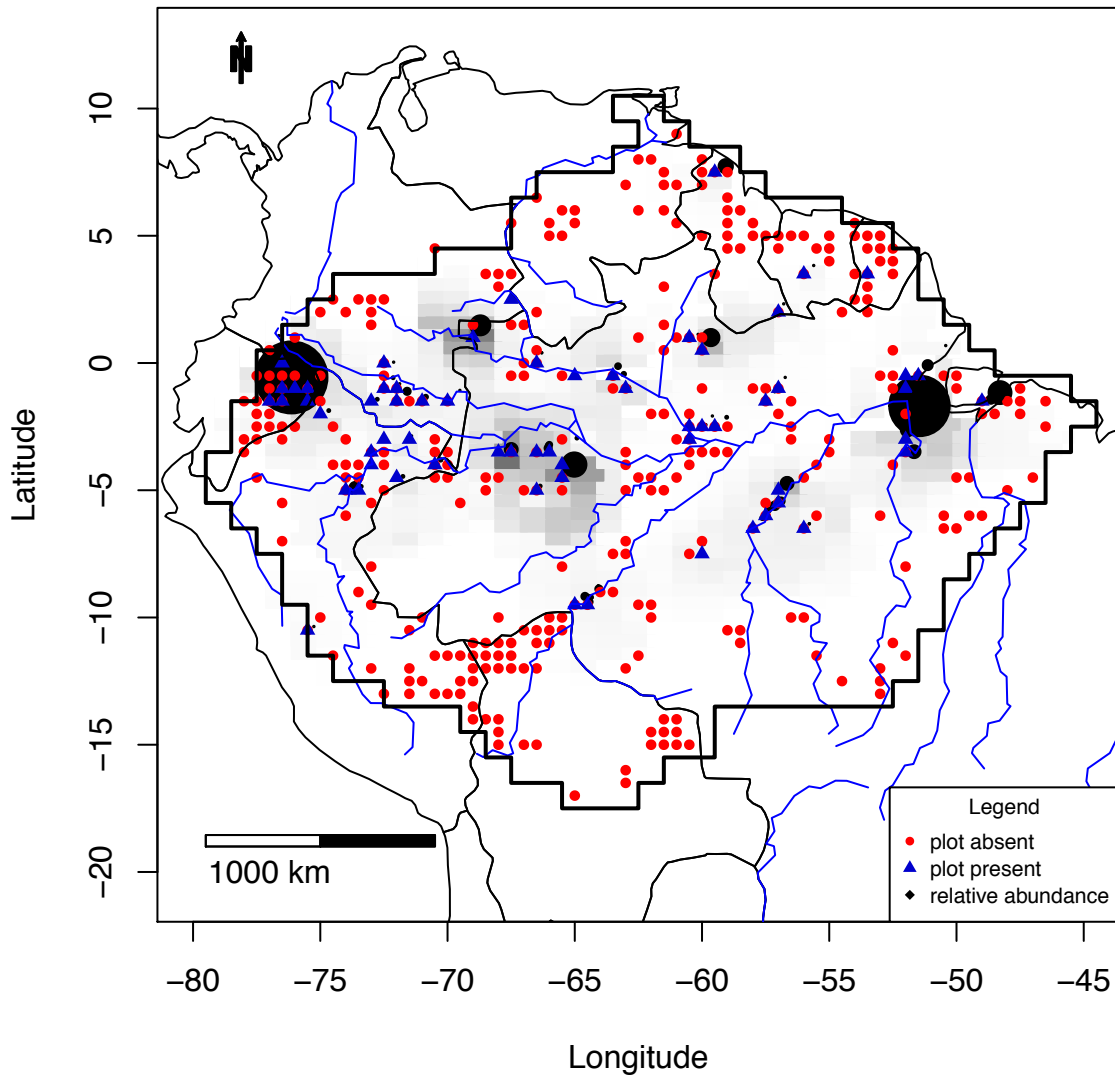



Figure S3\_94A Combined map of *Manilkara bidentata*

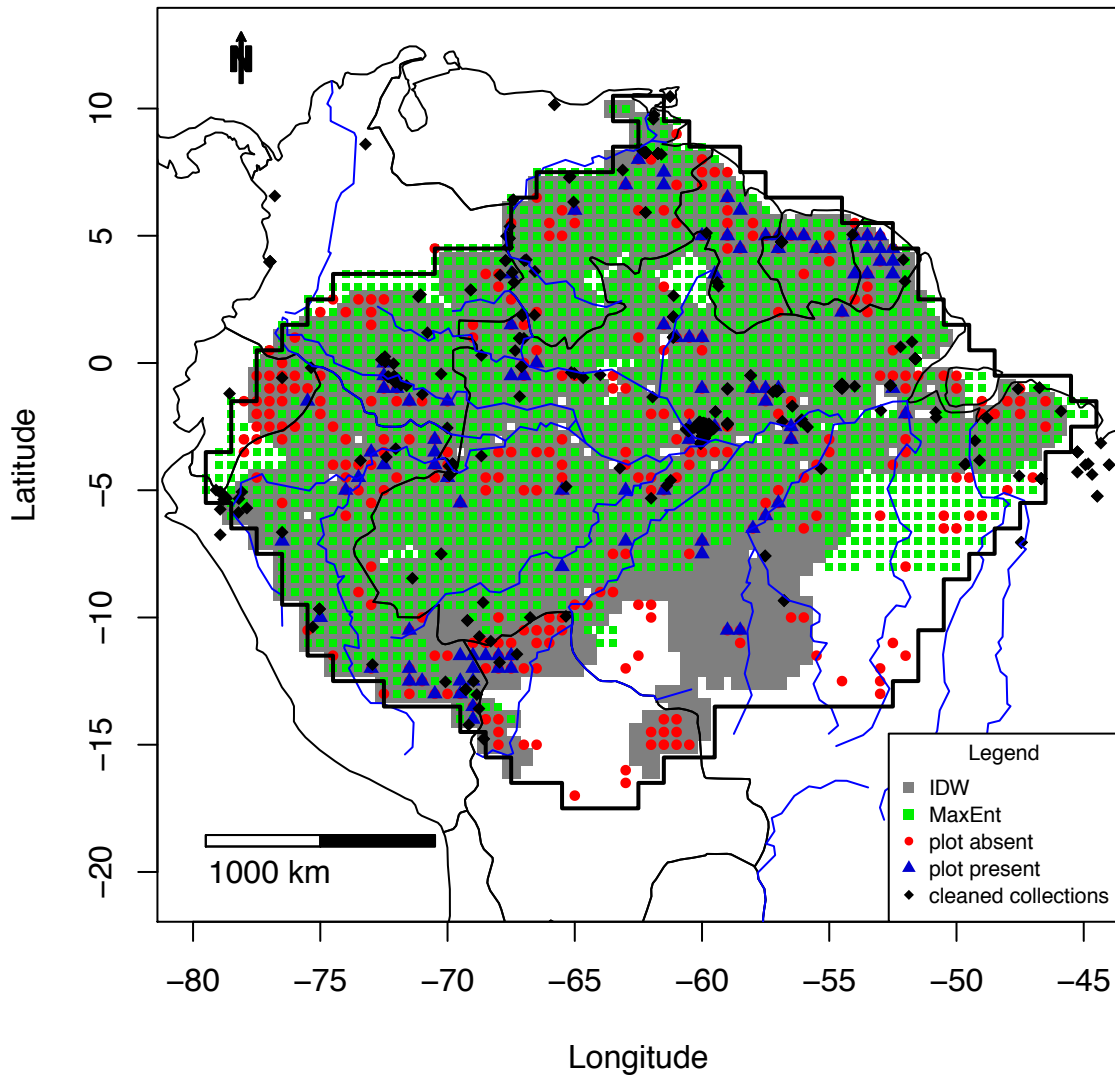

Figure S3\_94B MaxEnt map of *Manilkara\_bidentata*

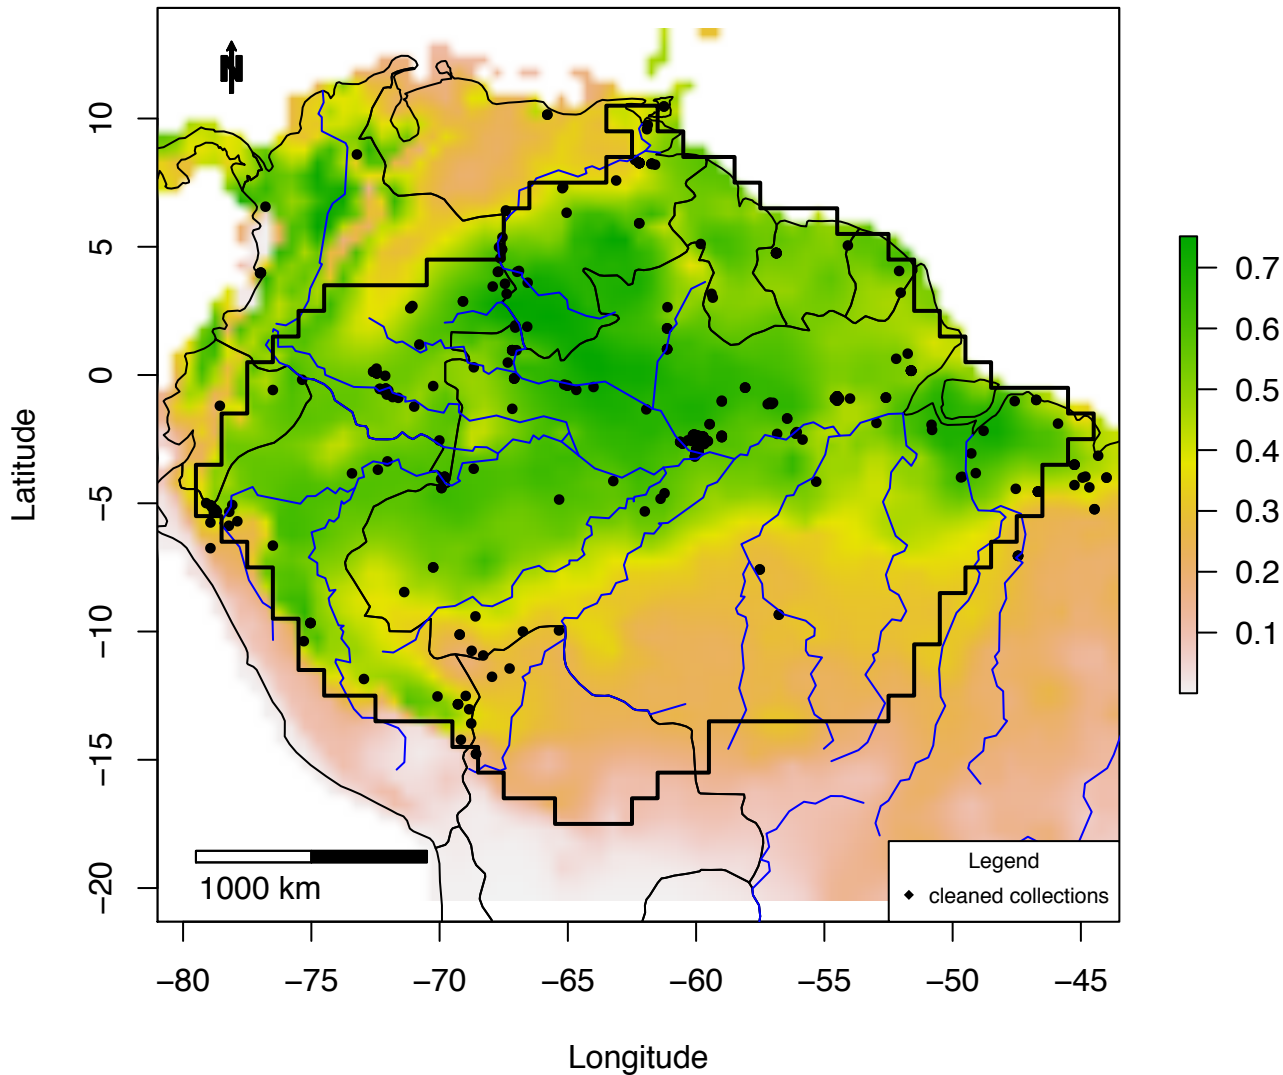

**Figure S3\_94C IDW map of *Manilkara bidentata*:**  
plots =0 – 0.21; IDW: 0 – 0.18

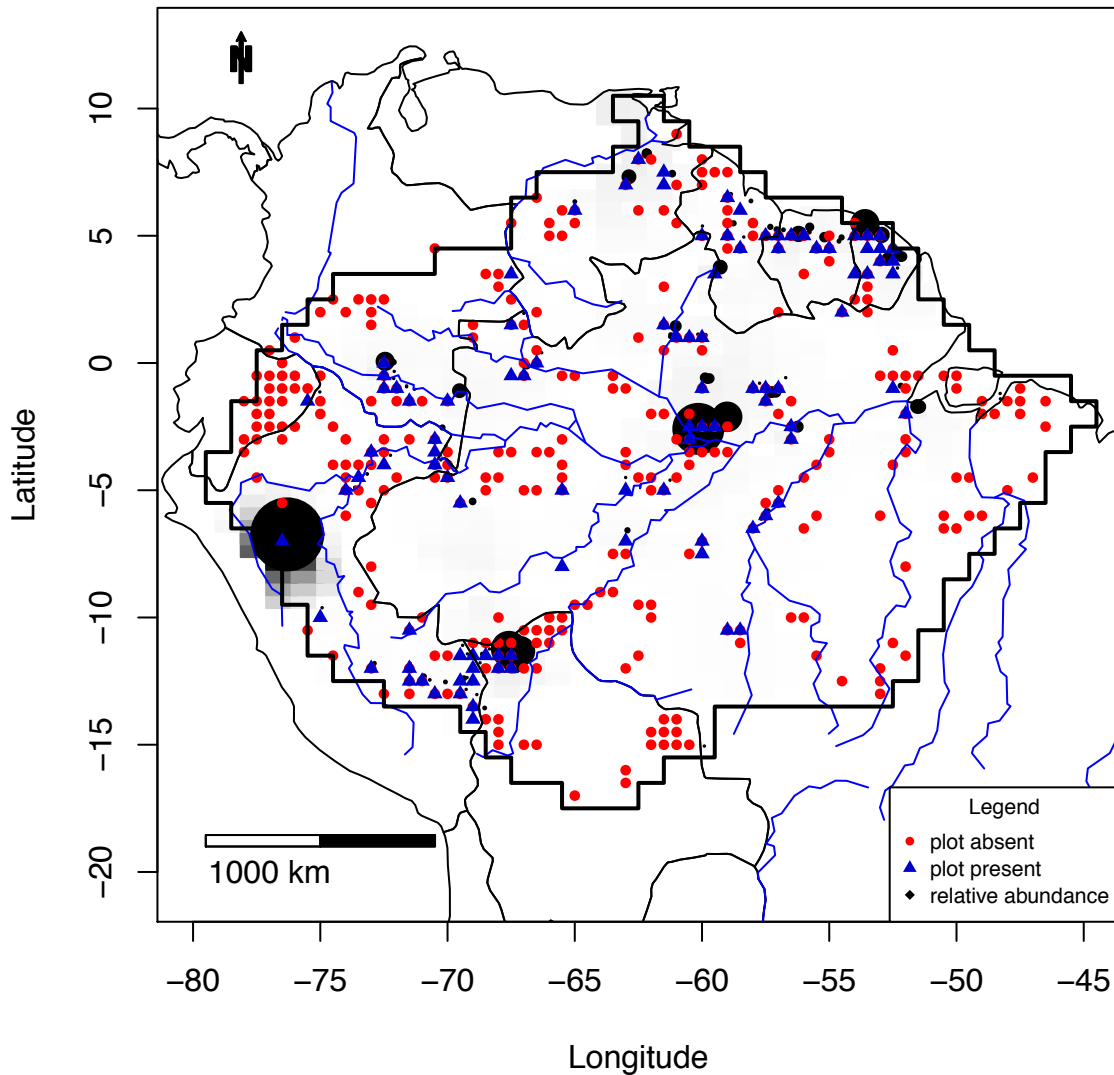

Figure S3\_95A Combined map of *Maquira\_coriacea*

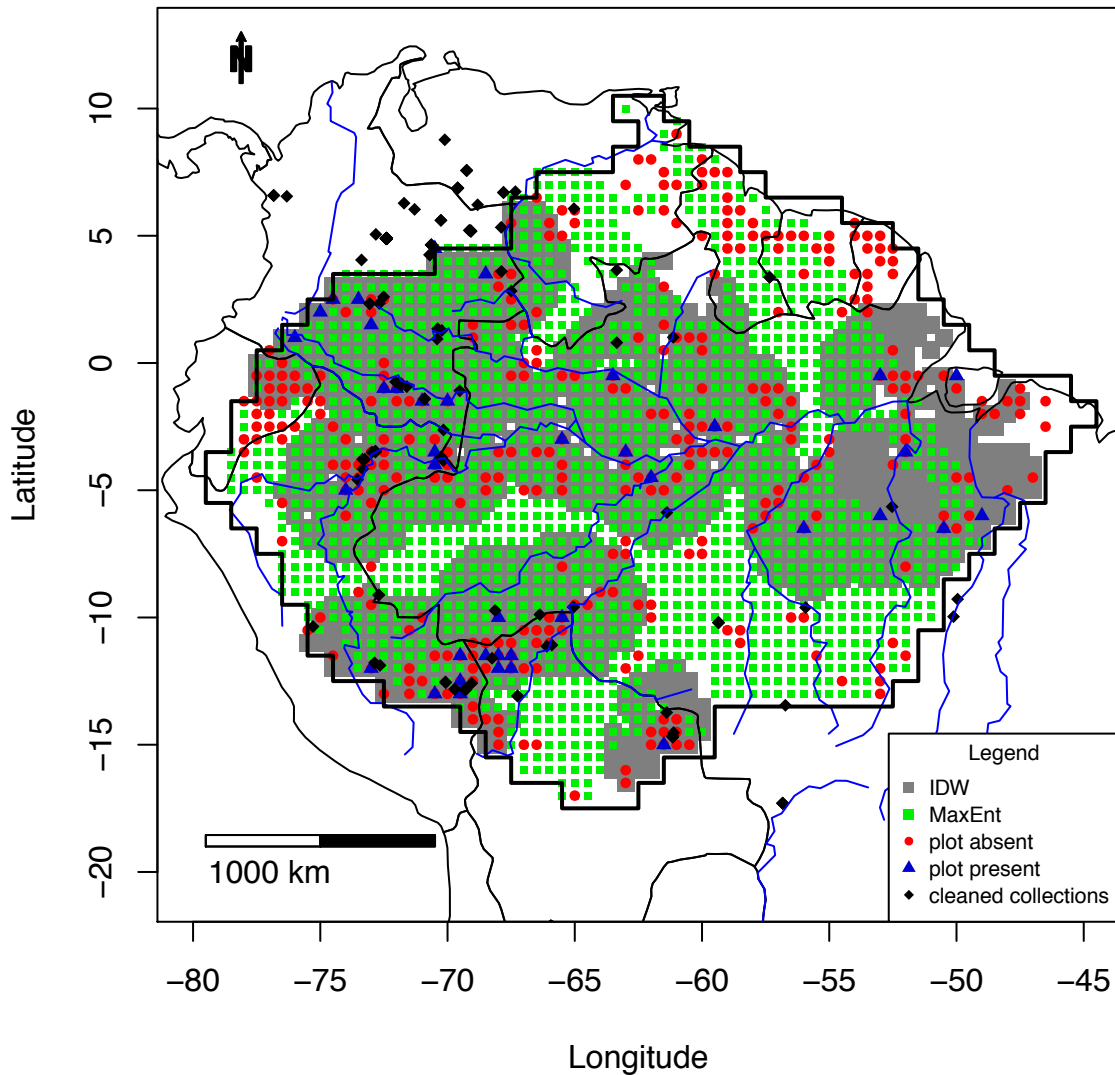

Figure S3\_95B MaxEnt map of *Maquira\_coriacea*

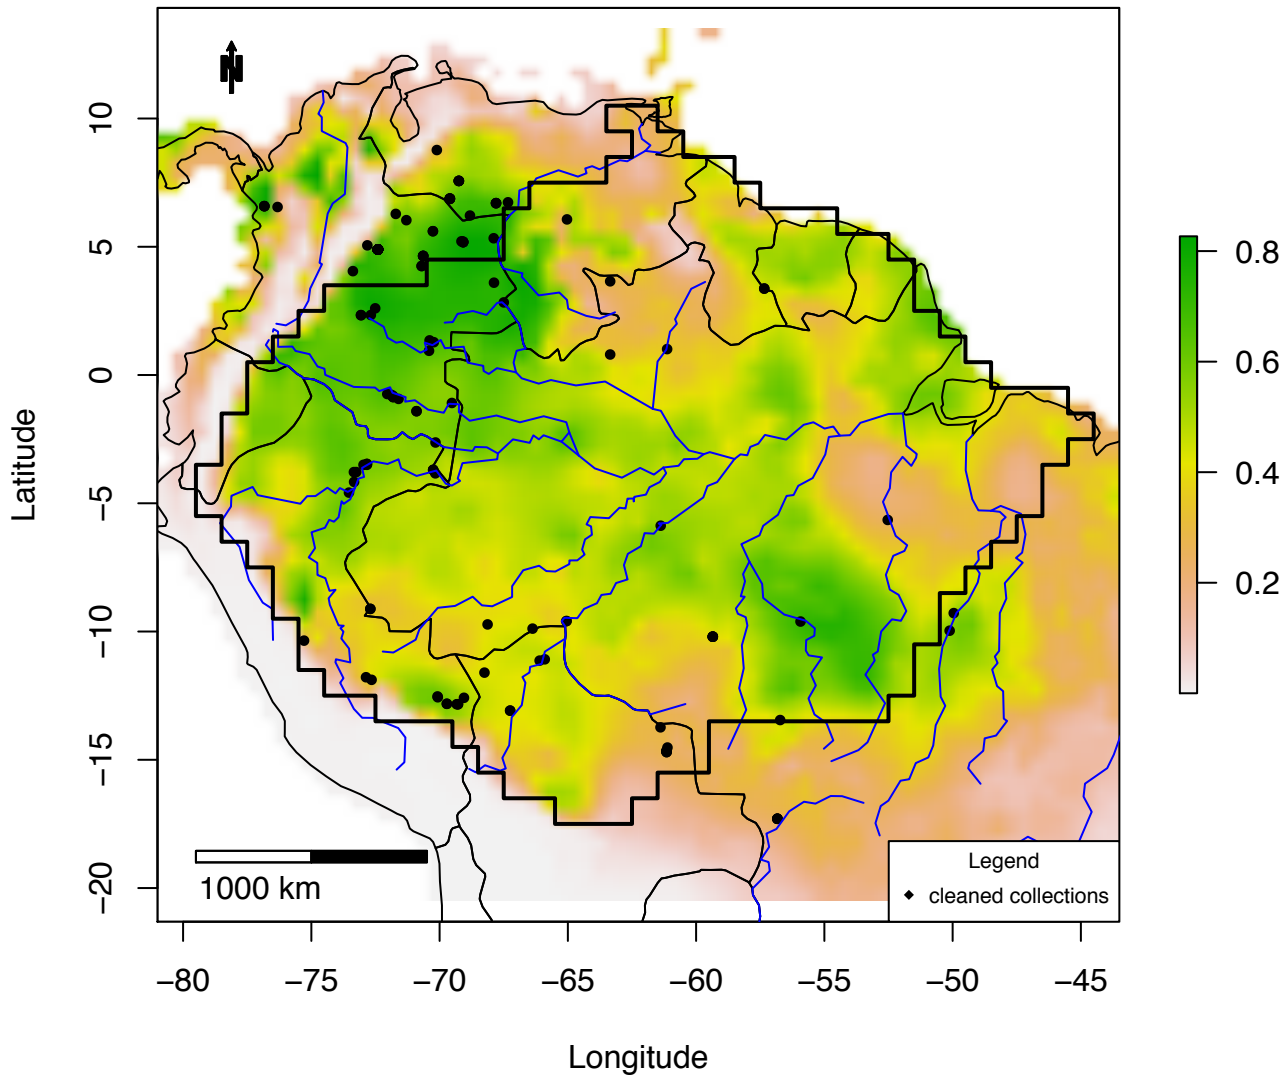

Figure S3\_95C IDW map of *Maquira coriacea*:  
plots =0 – 0.17; IDW: 0 – 0.1

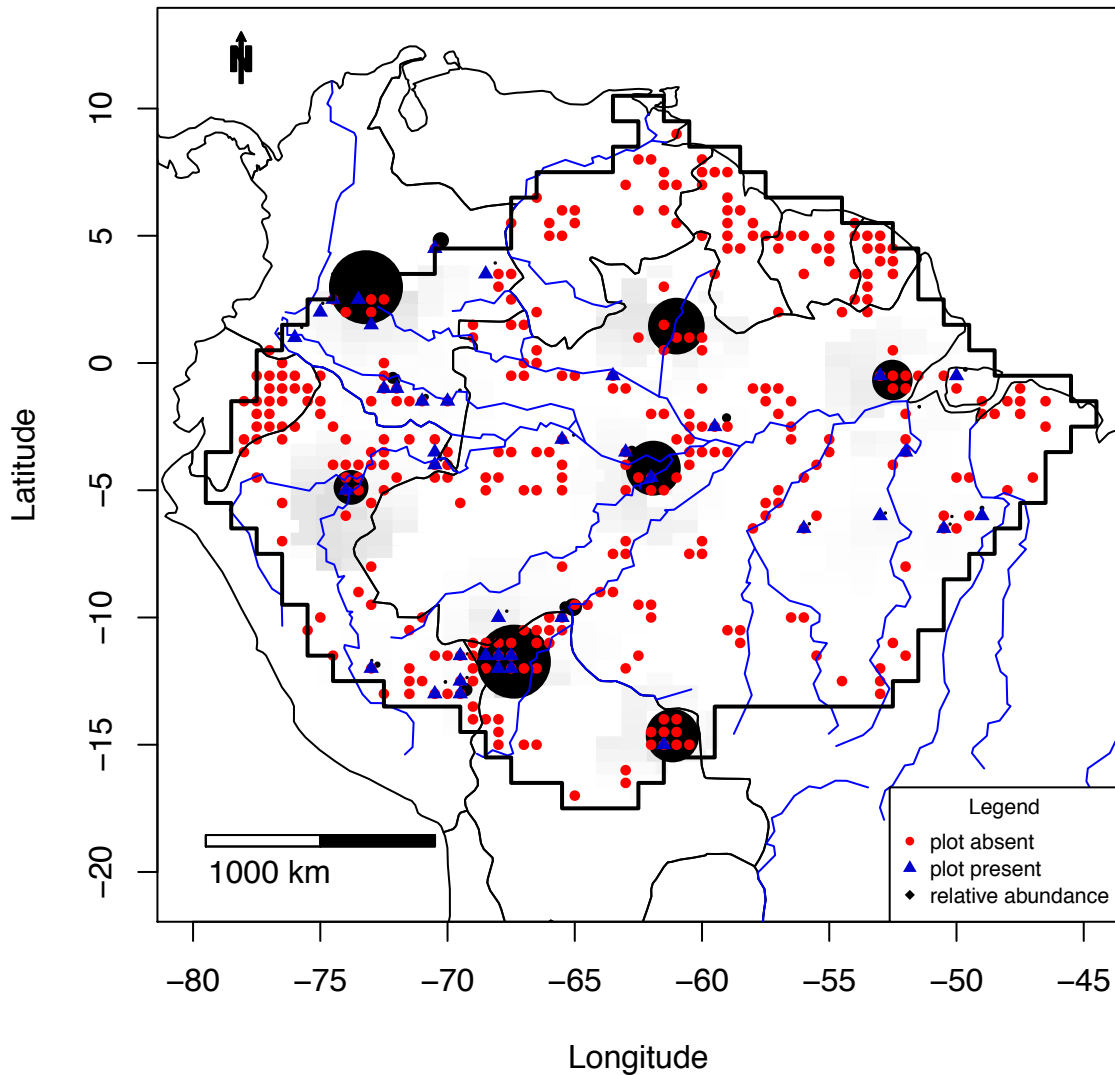

Figure S3\_96A Combined map of *Matisia\_ochrocalyx*

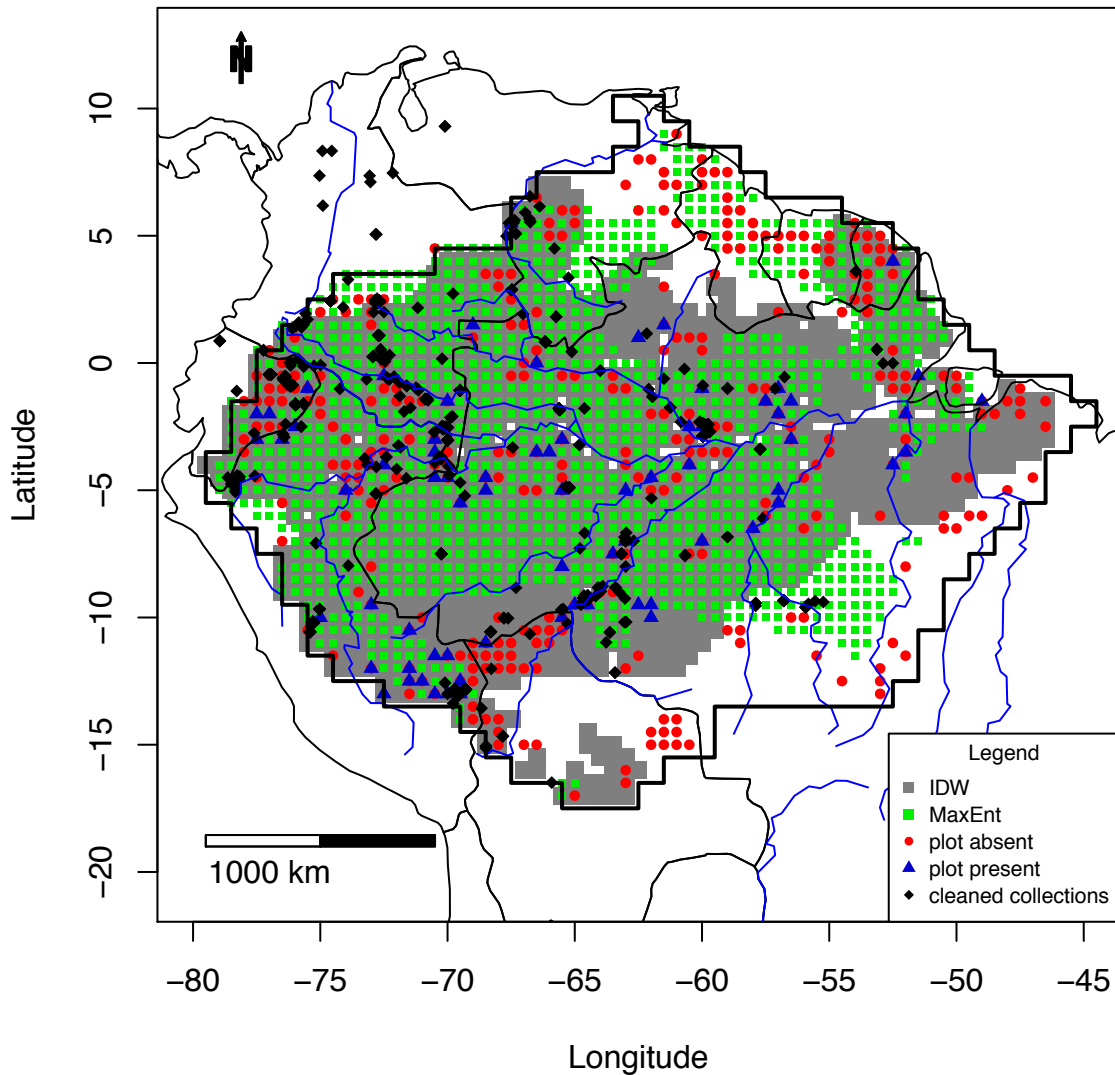

Figure S3\_96B MaxEnt map of *Matisia\_ochrocalyx*

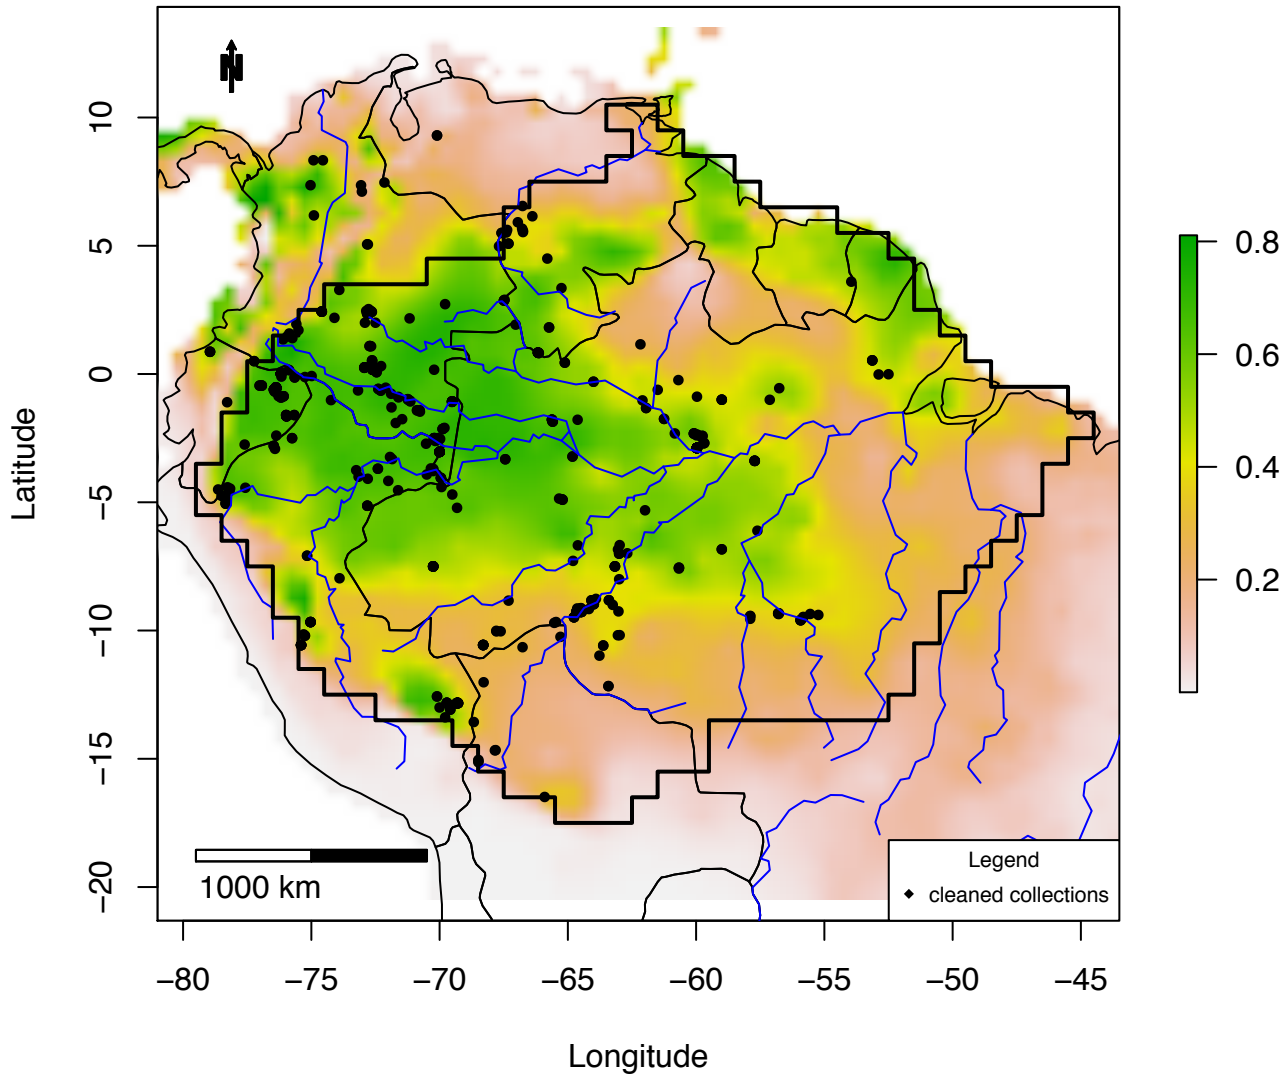



**Figure S3\_96C IDW map of *Matisia ochrocalyx*:**  
plots =0 – 0.16; IDW: 0 – 0.04

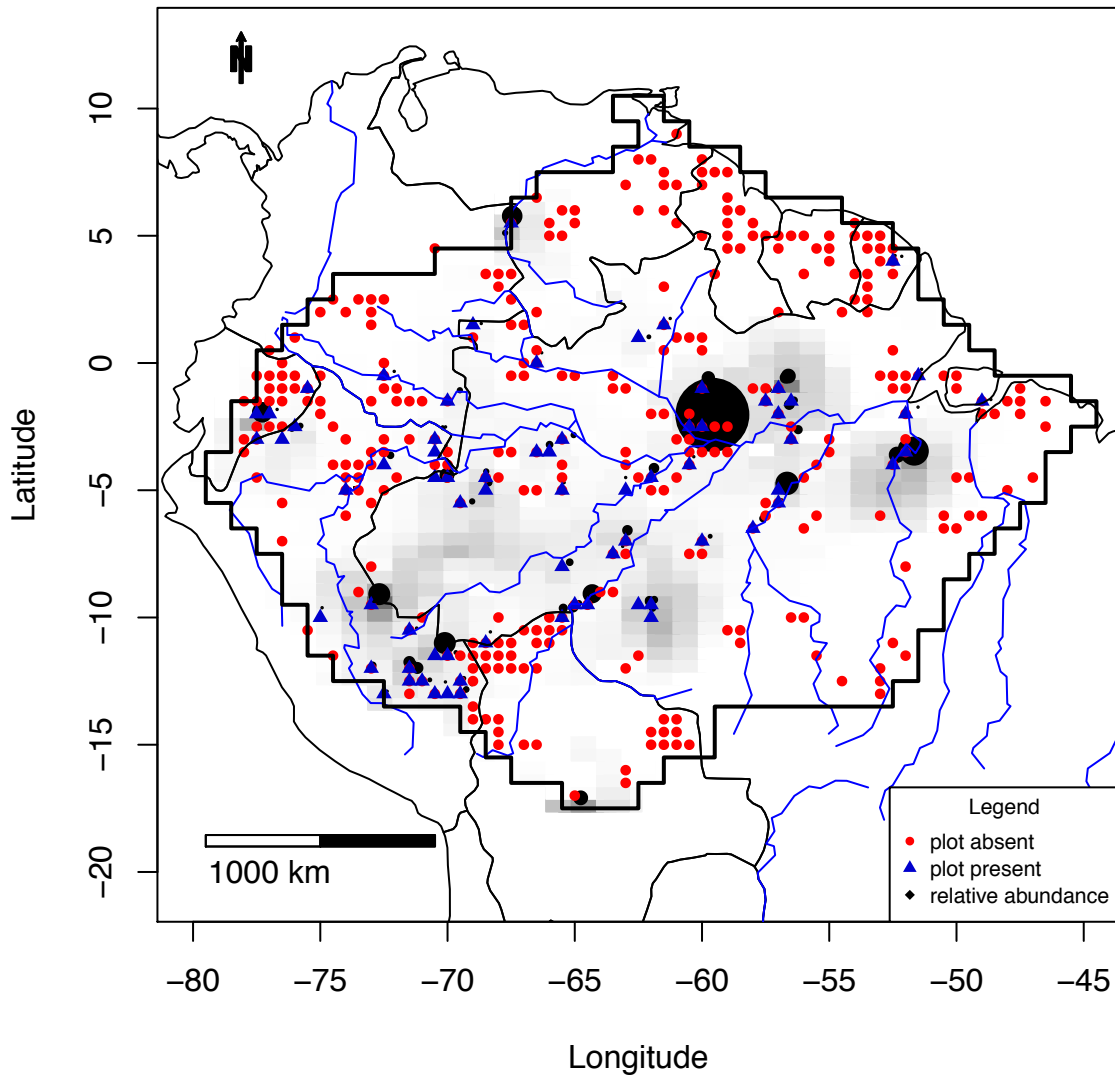

Figure S3\_97A Combined map of *Mauritia flexuosa*

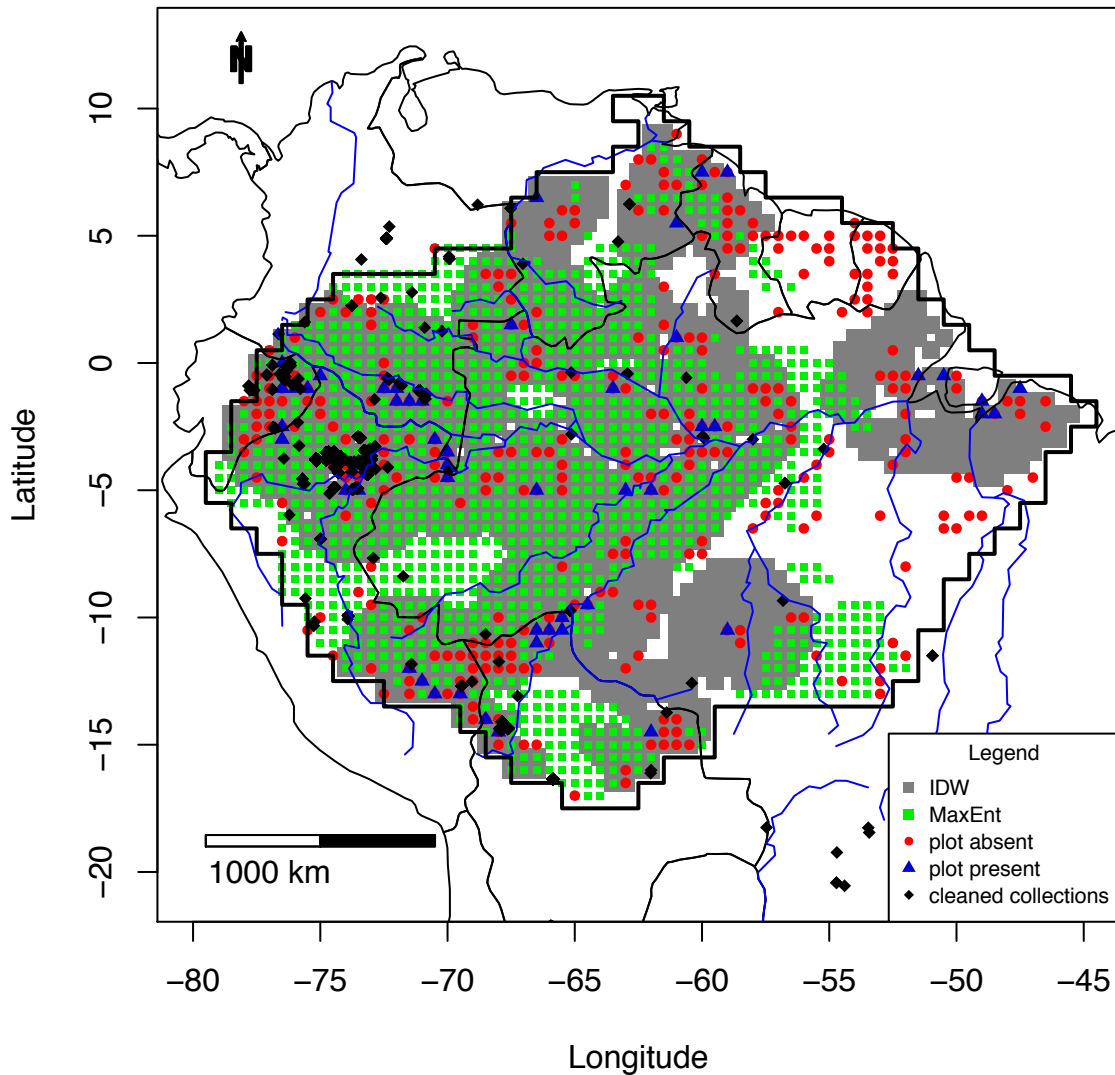

Figure S3\_97B MaxEnt map of *Mauritia flexuosa*

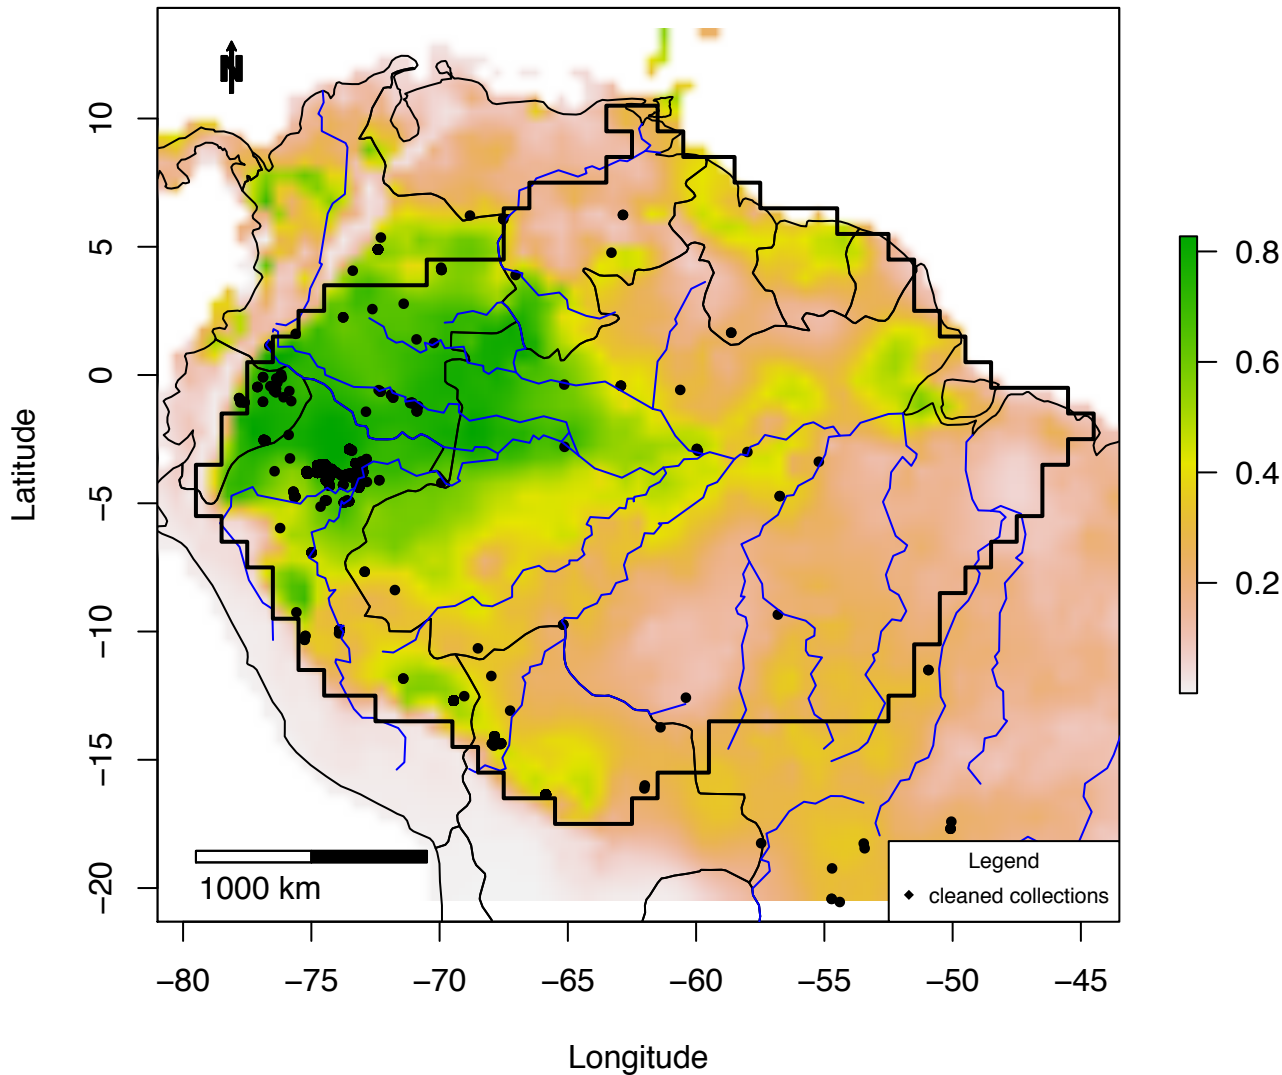

Figure S3\_97C IDW map of *Mauritia flexuosa*:  
plots =0 – 0.63; IDW: 0 – 0.11

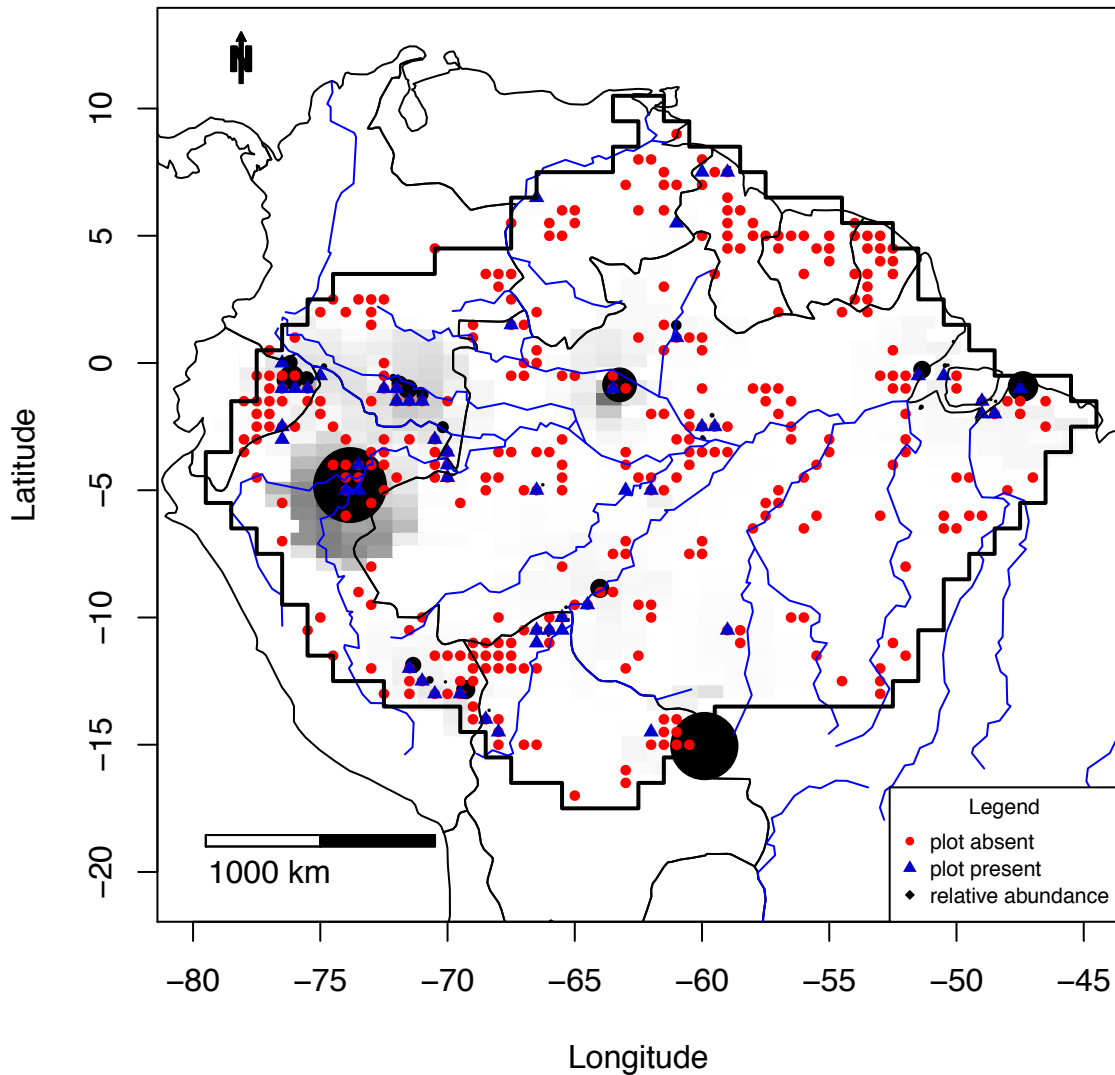

Figure S3\_98A Combined map of *Mauritiella\_aculeata*

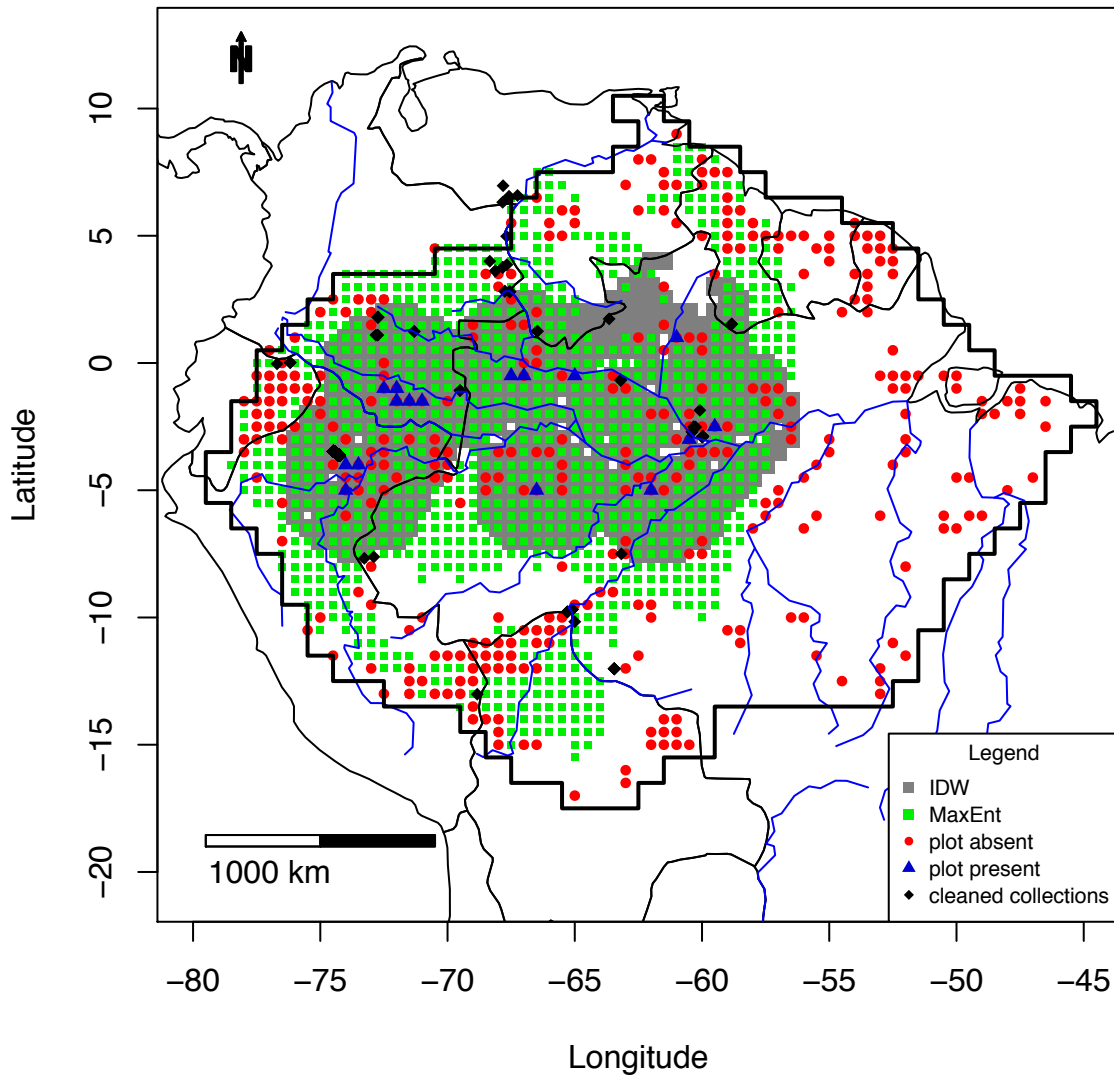

Figure S3\_98B MaxEnt map of *Mauritiella\_aculeata*

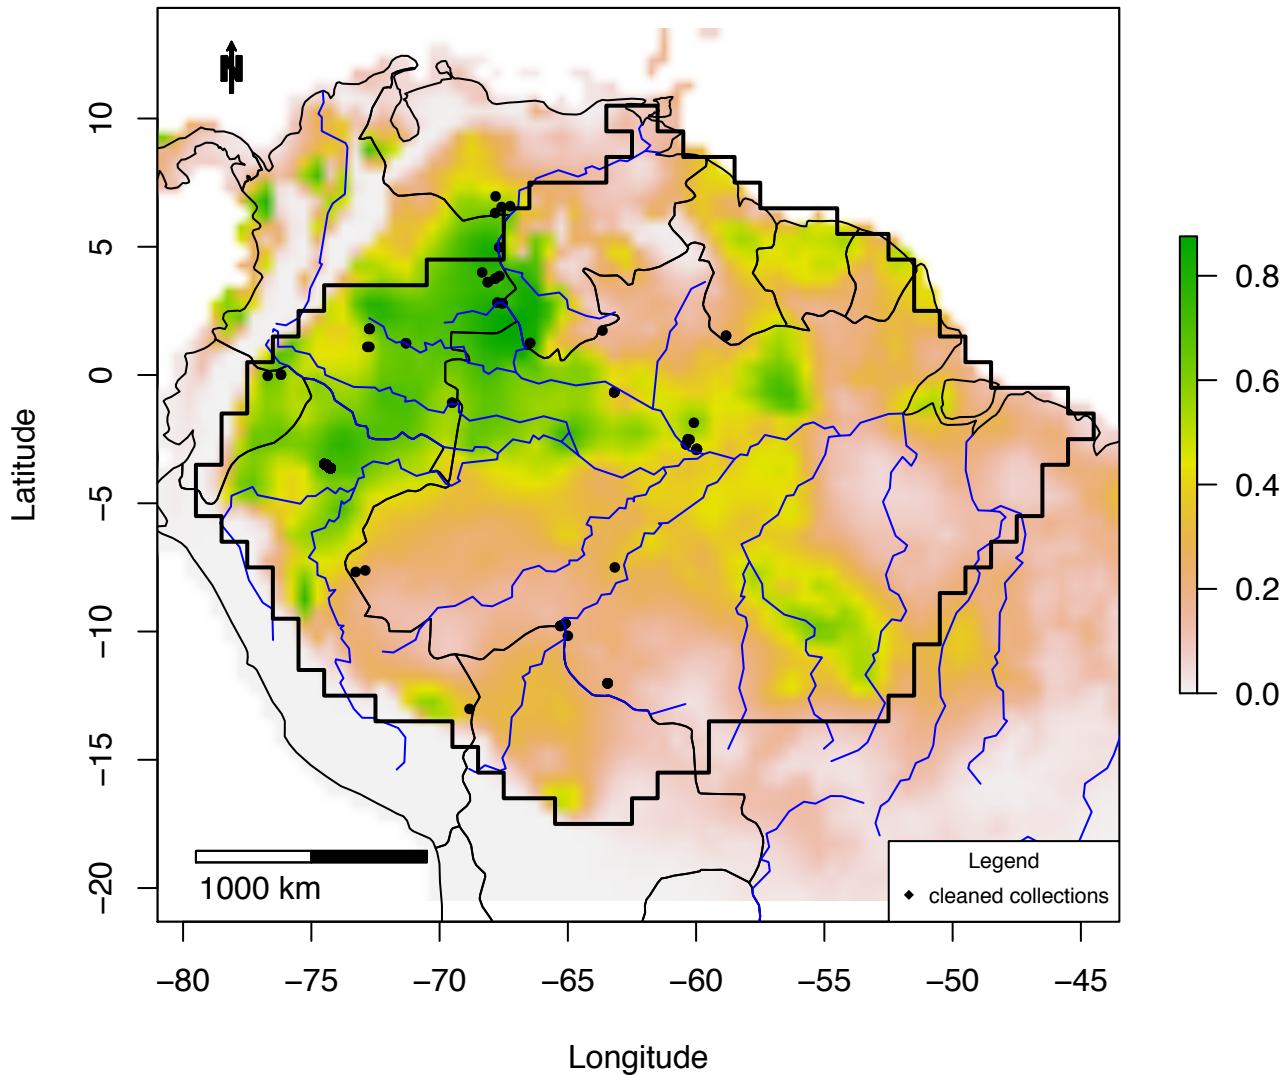

Figure S3\_98C IDW map of *Mauritiella aculeata*:  
plots = 0 – 0.32; IDW: 0 – 0.05

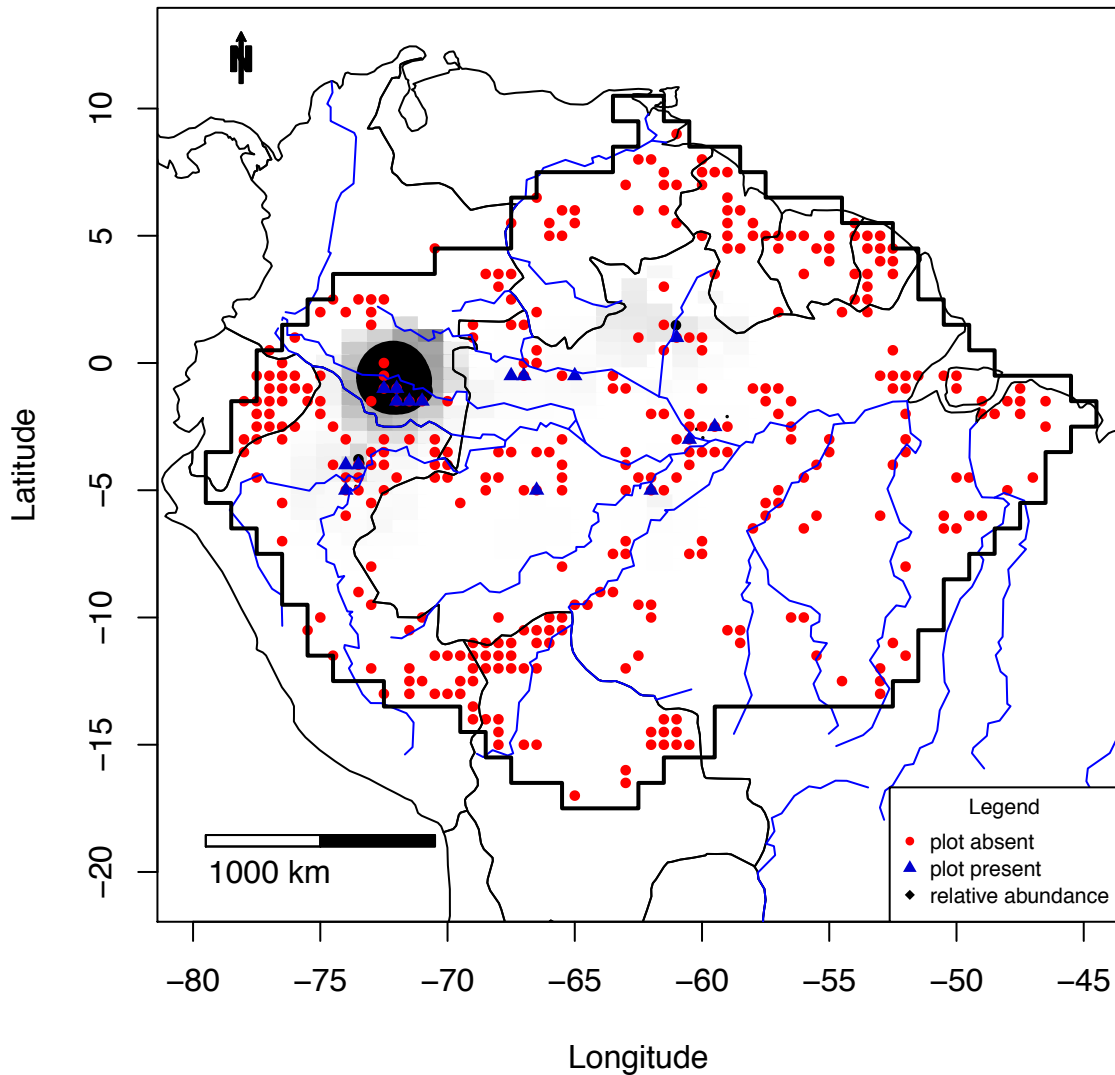

Figure S3\_99A Combined map of *Metrodorea\_flavida*

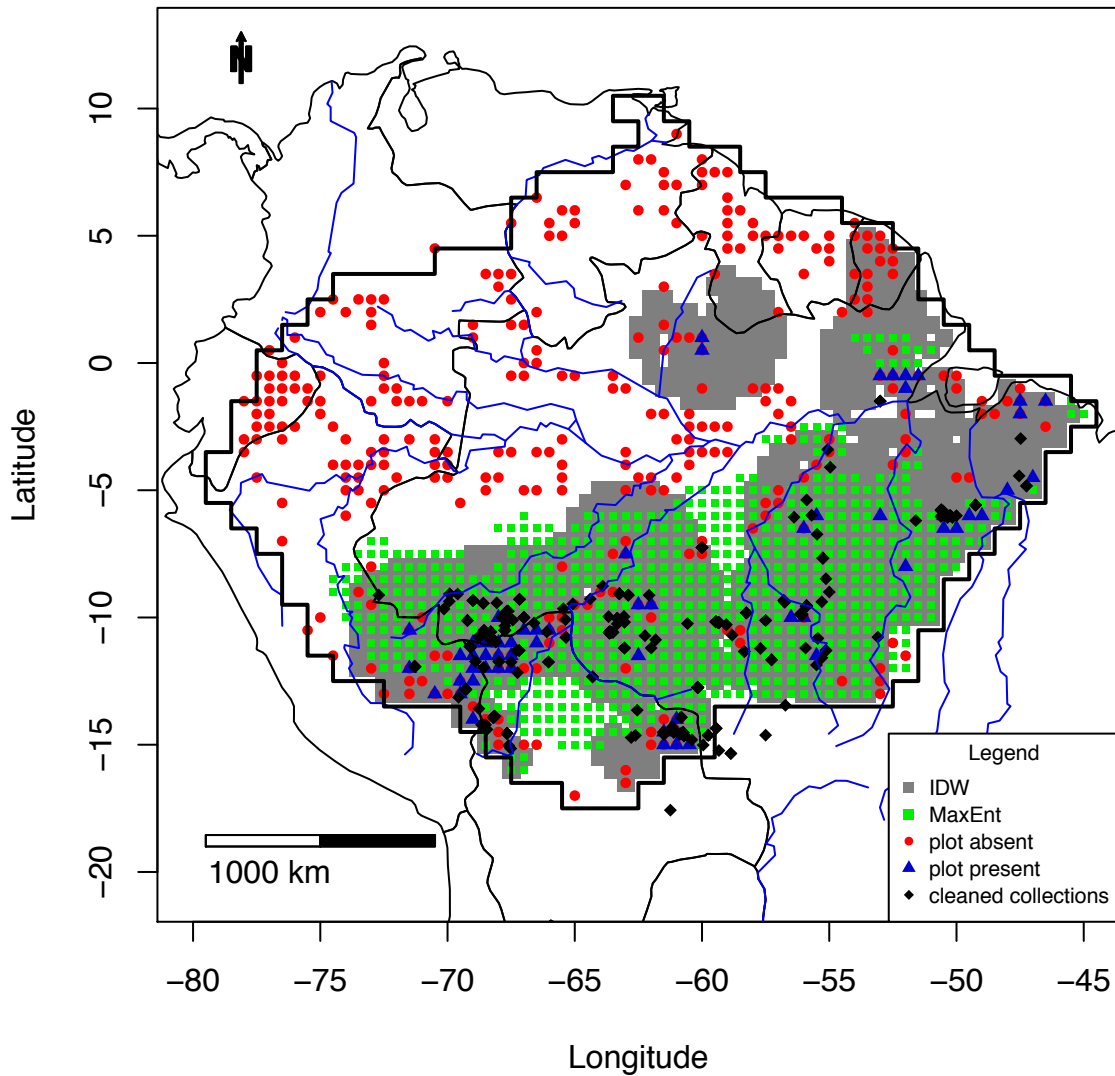



Figure S3\_99B MaxEnt map of *Metrodorea\_flavida*

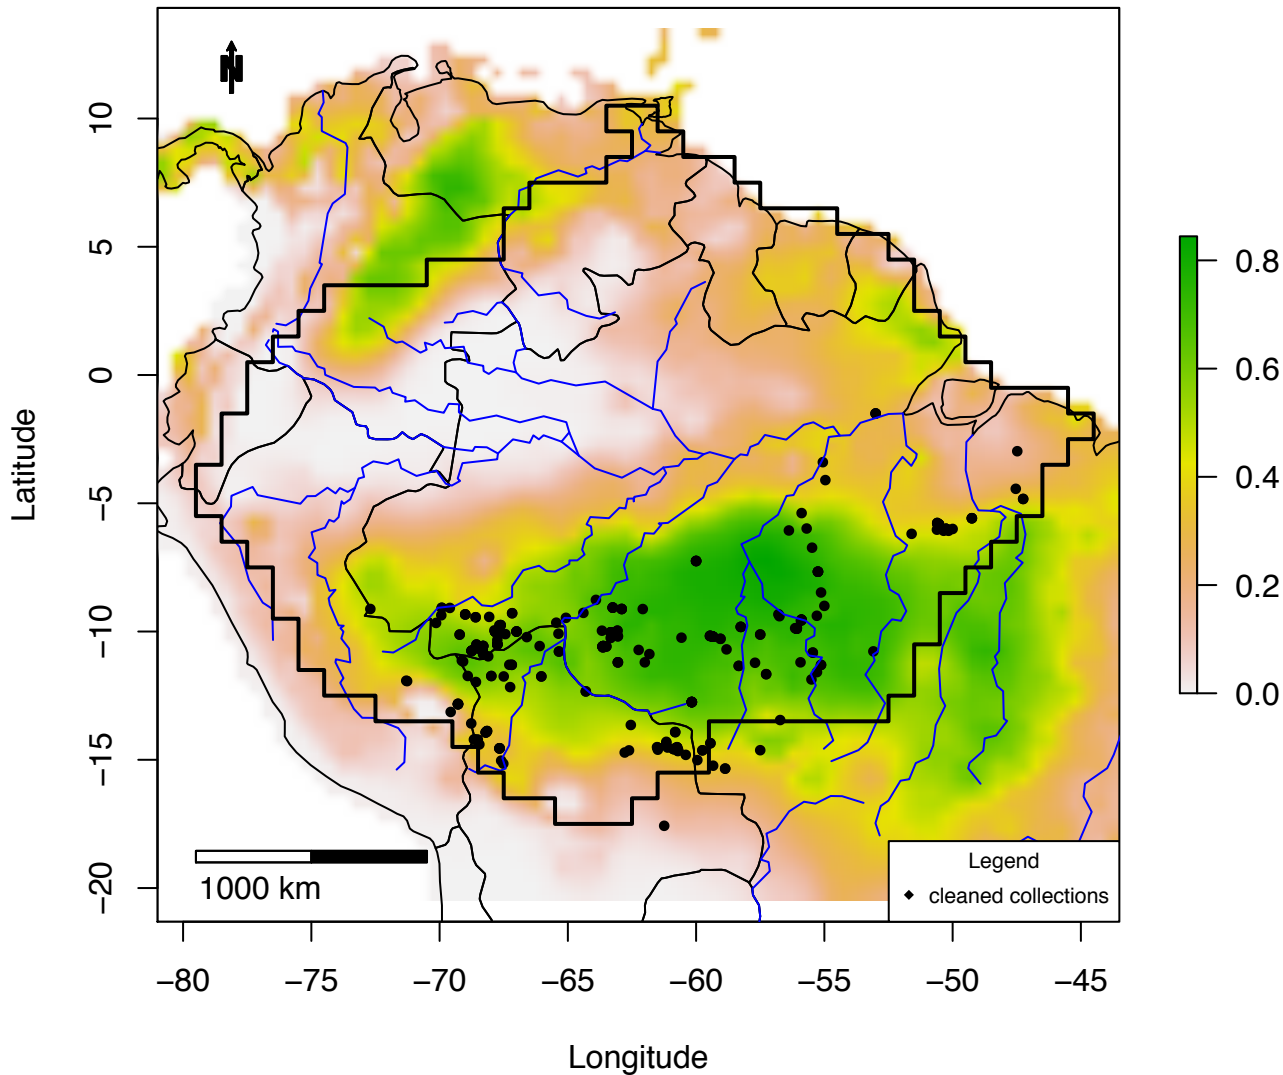

**Figure S3\_99C IDW map of *Metrodorea\_flavida*:**  
**plots =0 – 0.19; IDW: 0 – 0.08**

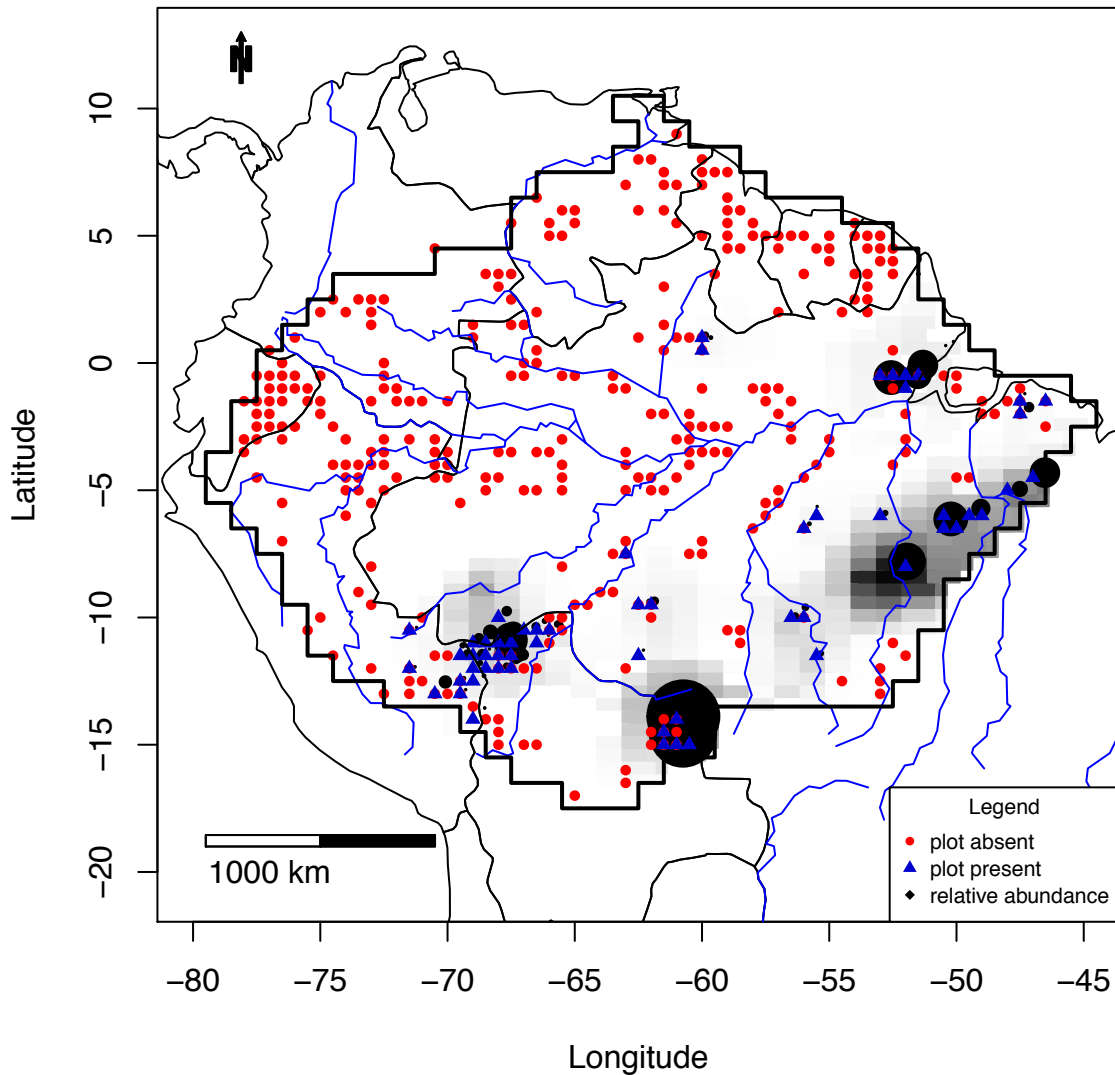

Figure S3\_100A Combined map of *Mezilaurus\_itauba*

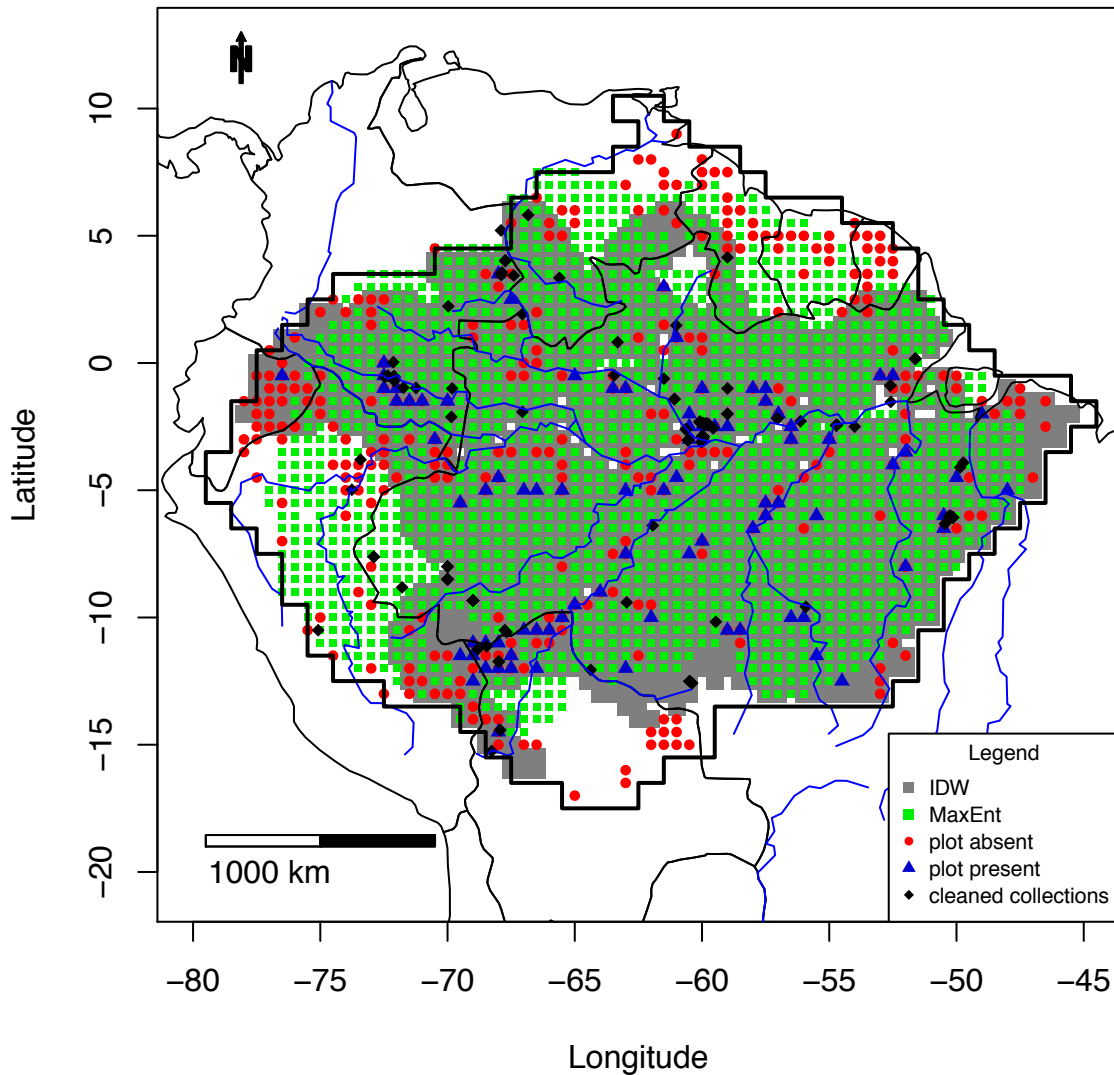

Figure S3\_100B MaxEnt map of *Mezilaurus\_itauba*

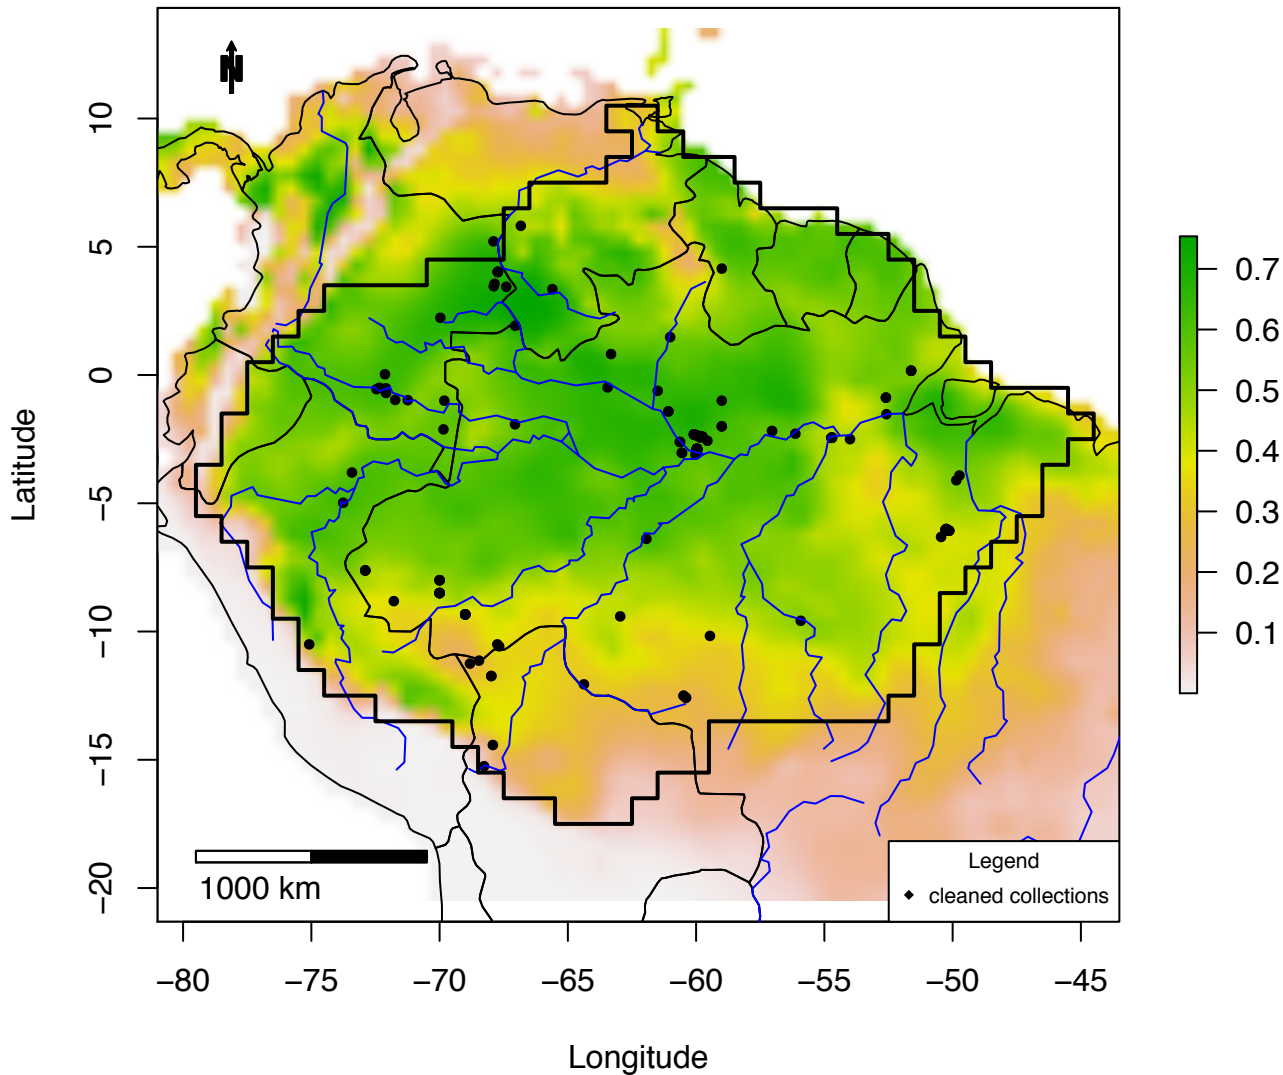

**Figure S3\_100C IDW map of *Mezilaurus\_itauba*:  
plots =0 – 0.13; IDW: 0 – 0.03**

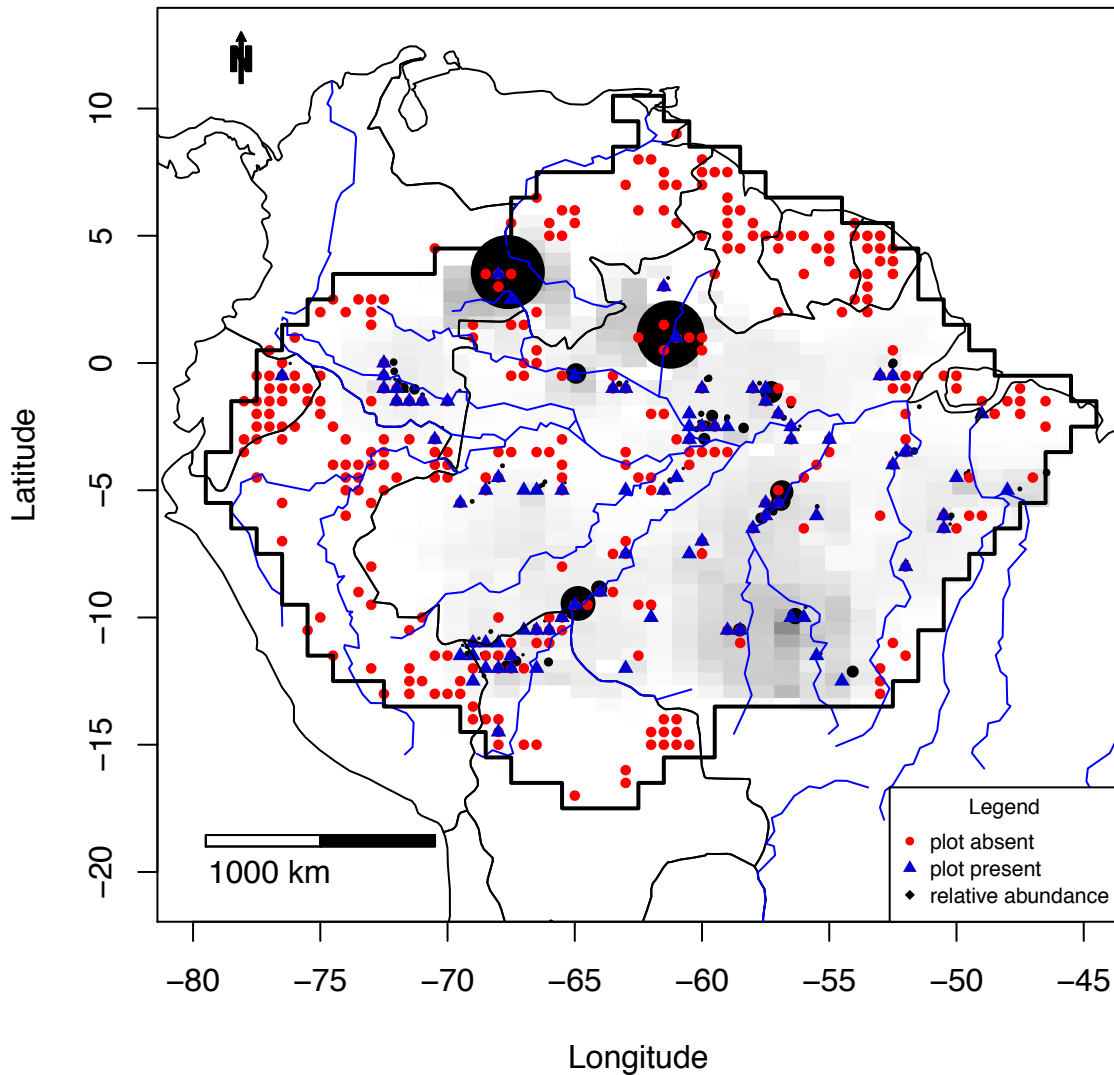

Figure S3\_101A Combined map of *Micrandra\_elata*

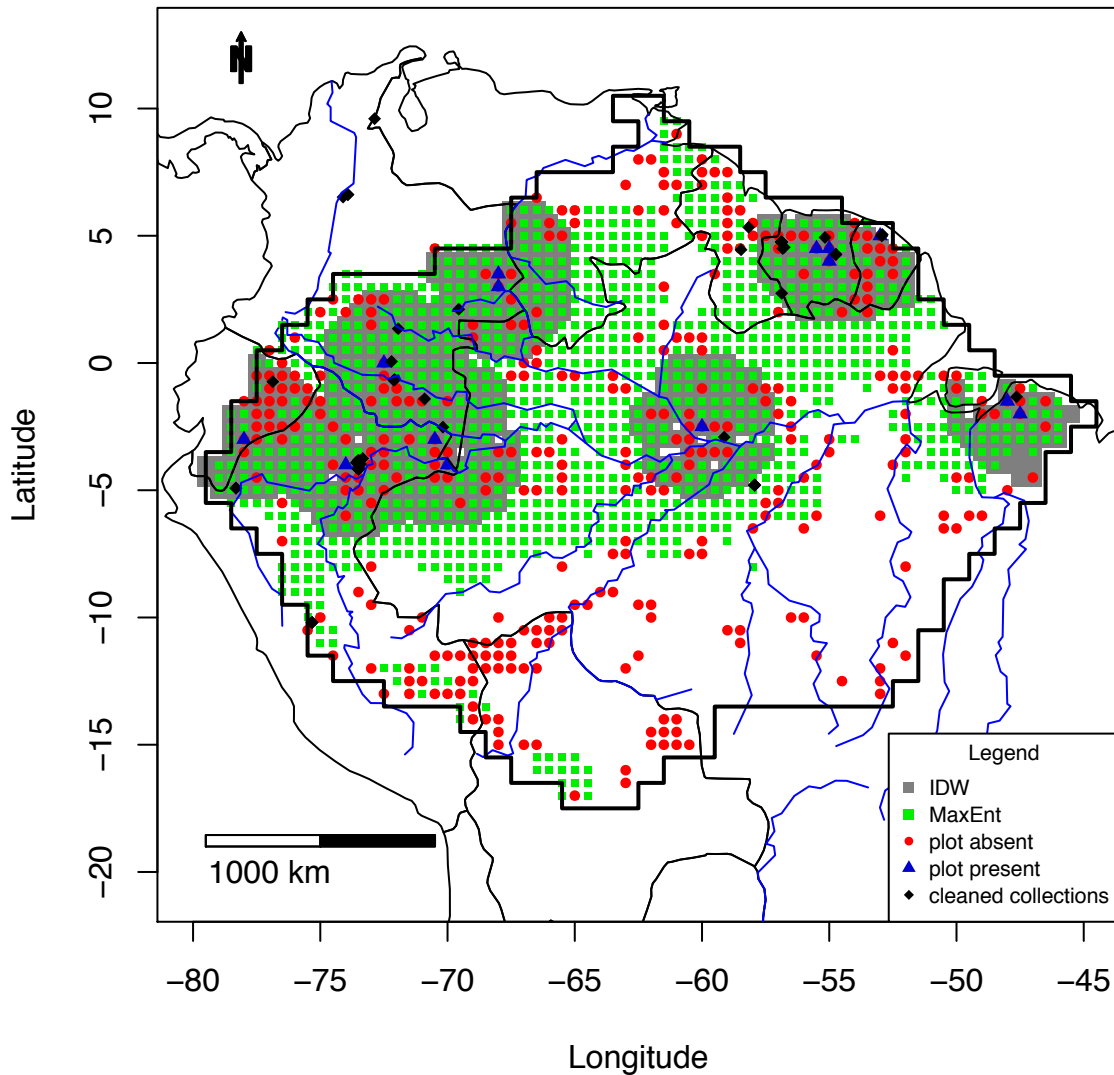

Figure S3\_101B MaxEnt map of *Micrandra\_elata*

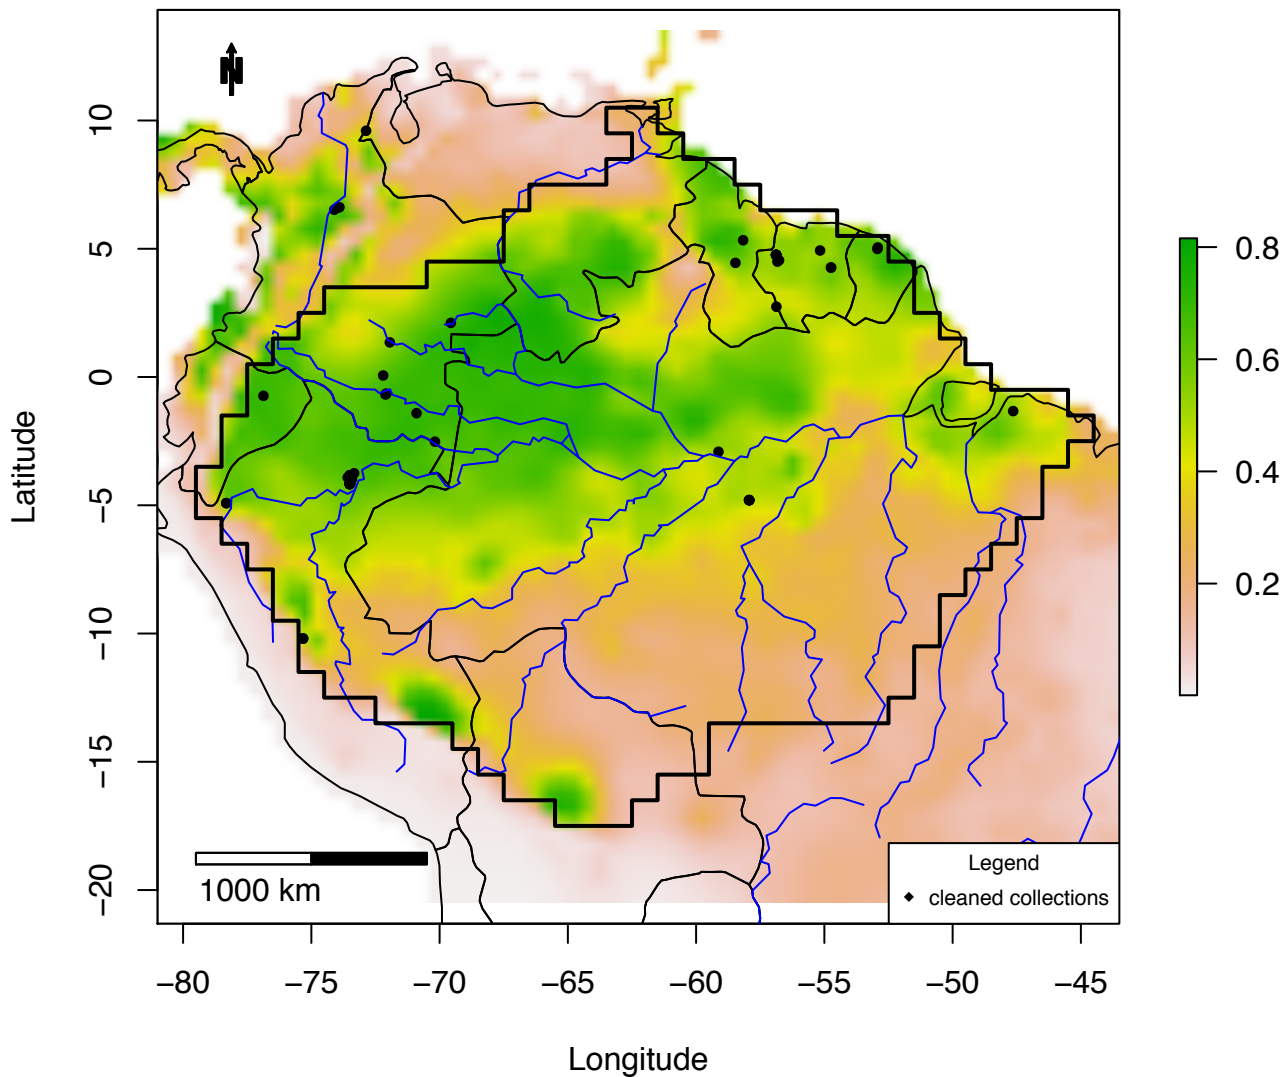

Figure S3\_101C IDW map of *Micrandra\_elata*:  
plots = 0 – 0.29; IDW: 0 – 0.05

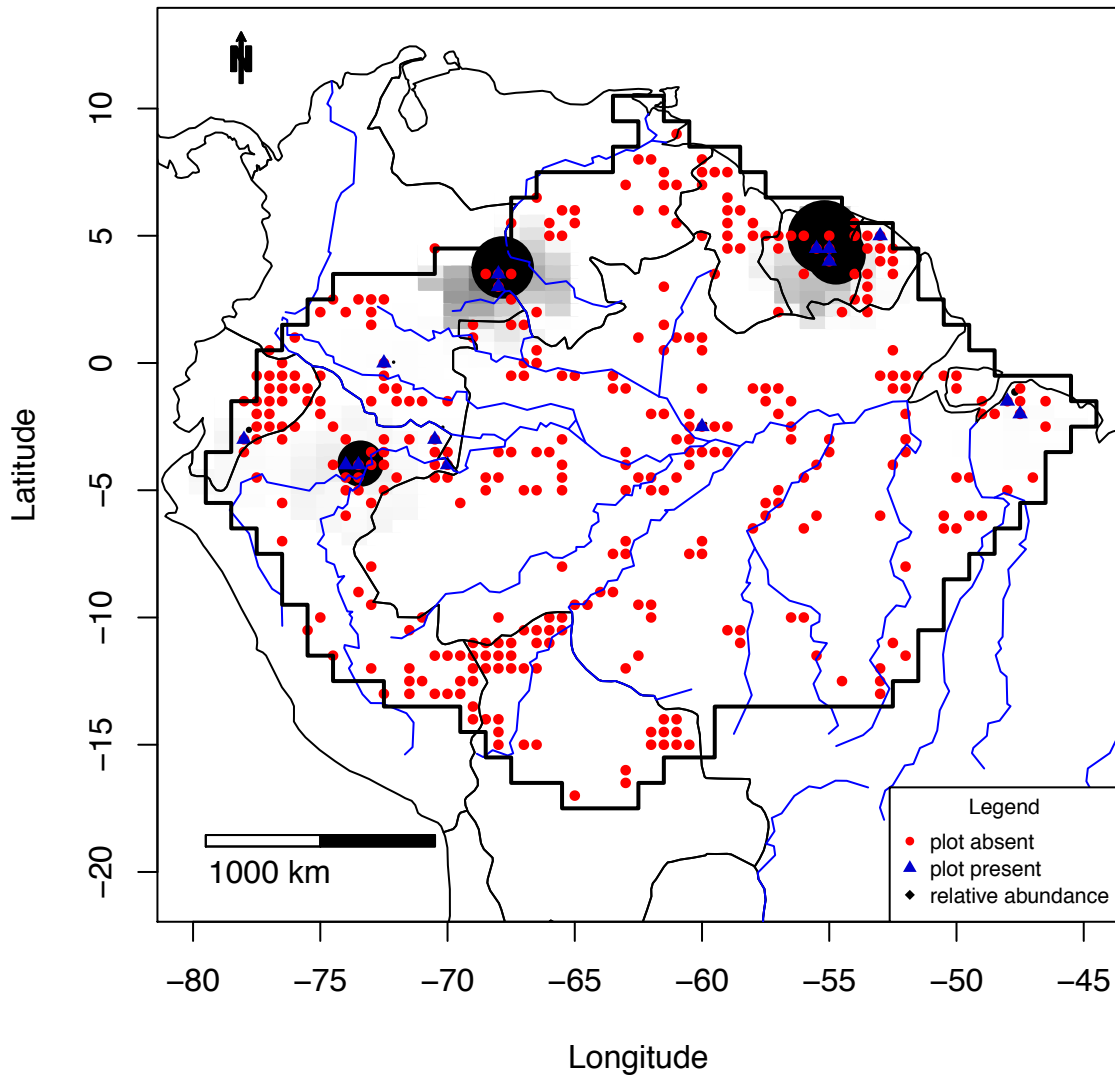



Figure S3\_102A Combined map of *Micrandra glabra*

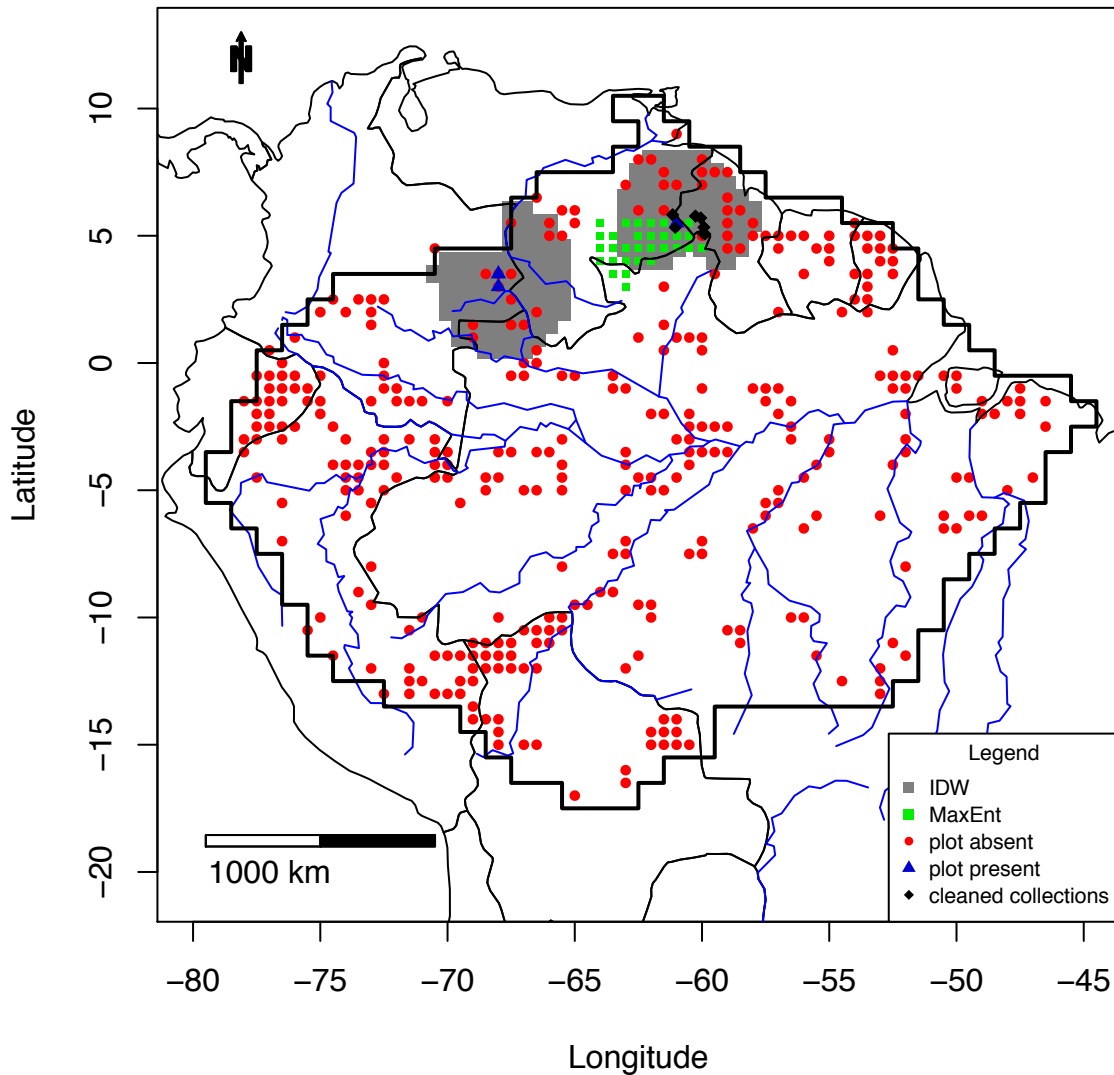

Figure S3\_102B MaxEnt map of *Micrandra\_glabra*

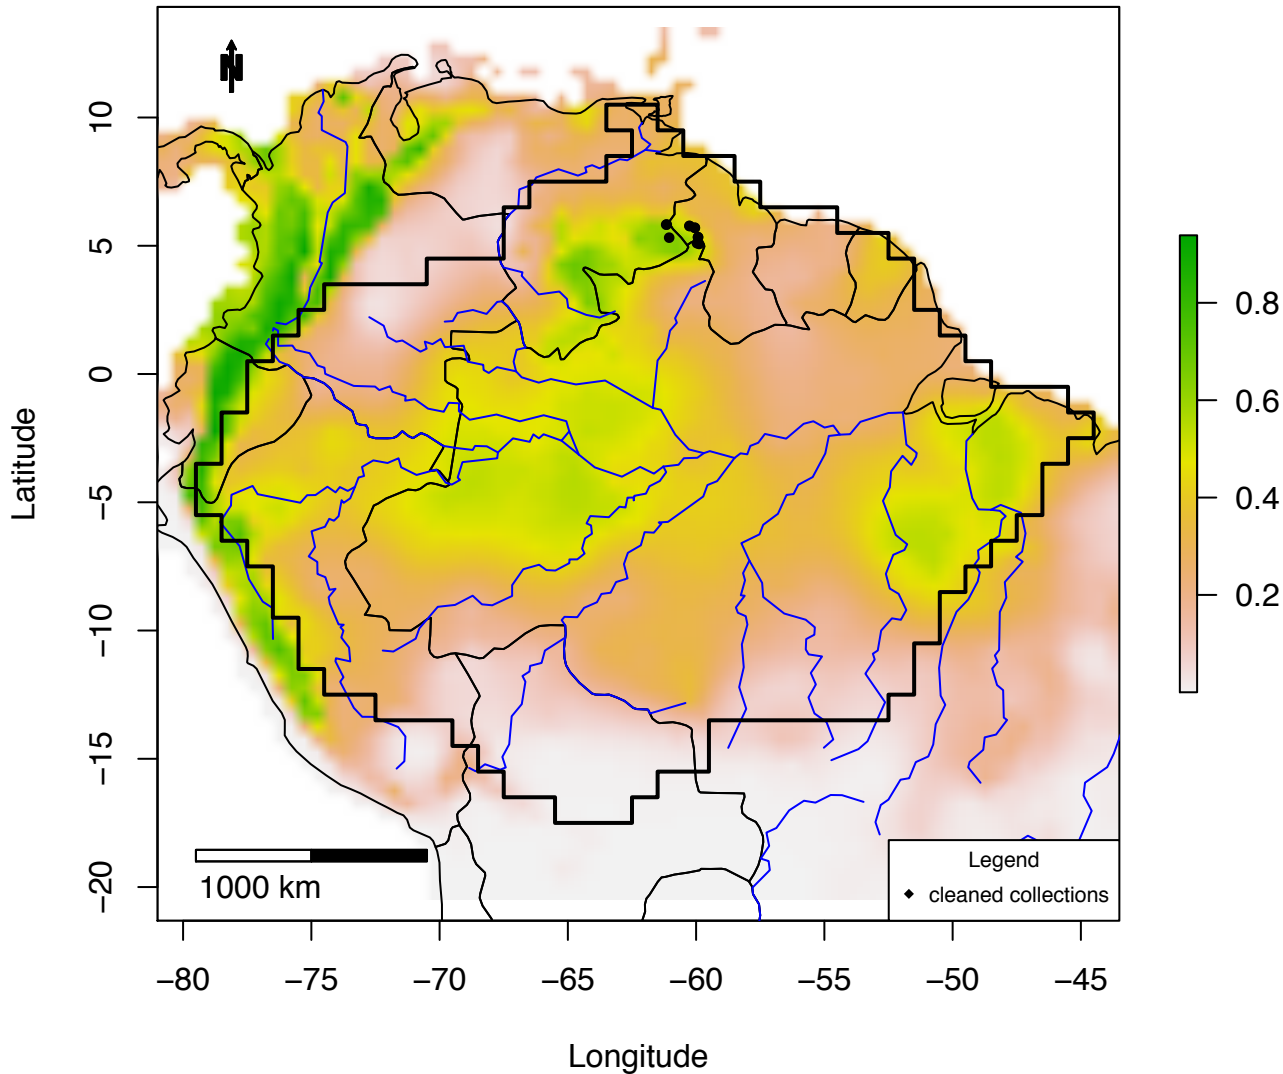

Figure S3\_102C IDW map of *Micrandra glabra*:  
plots =0 – 0.92; IDW: 0 – 0.25

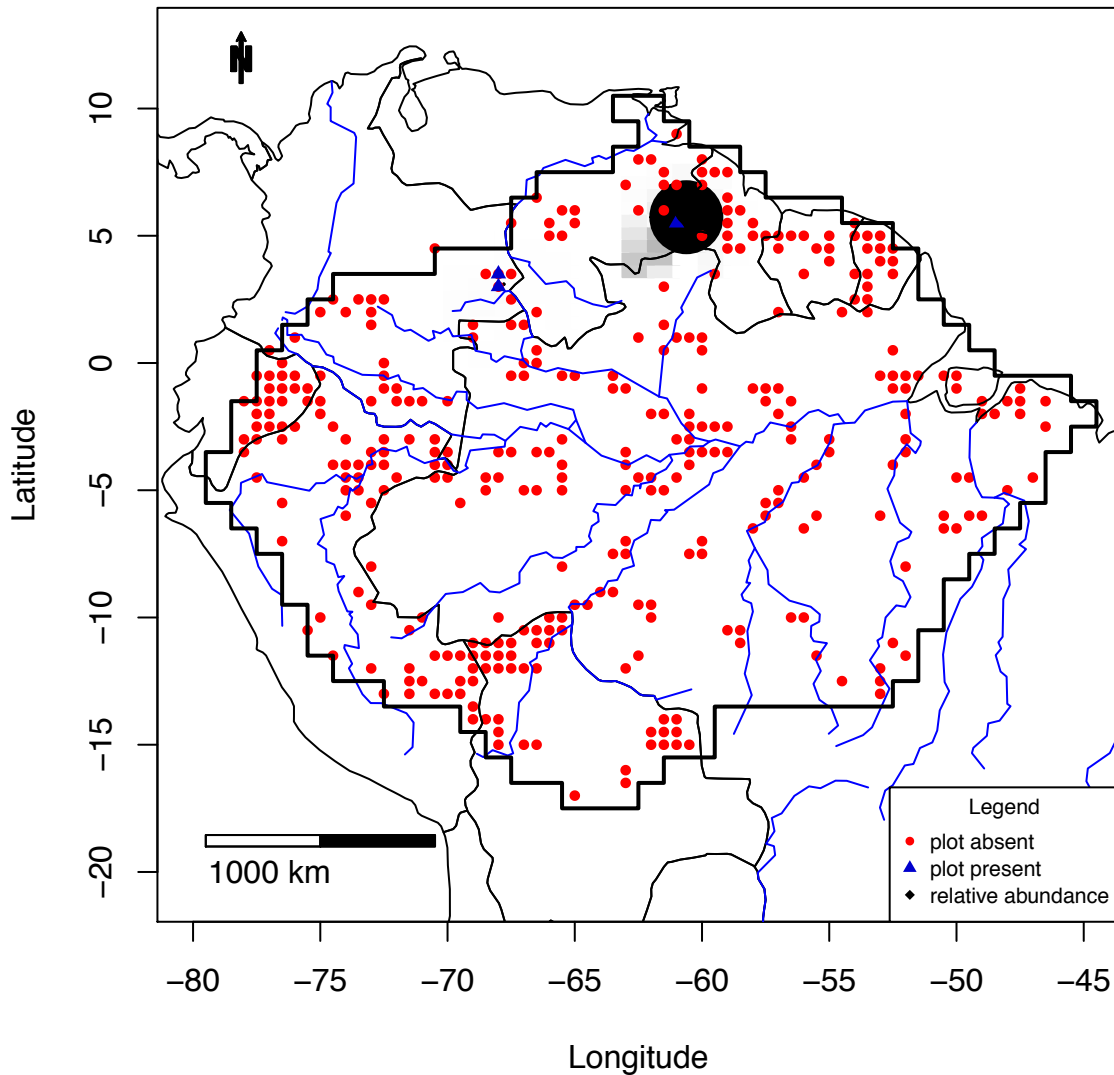

Figure S3\_103A Combined map of *Micrandra\_spruceana*

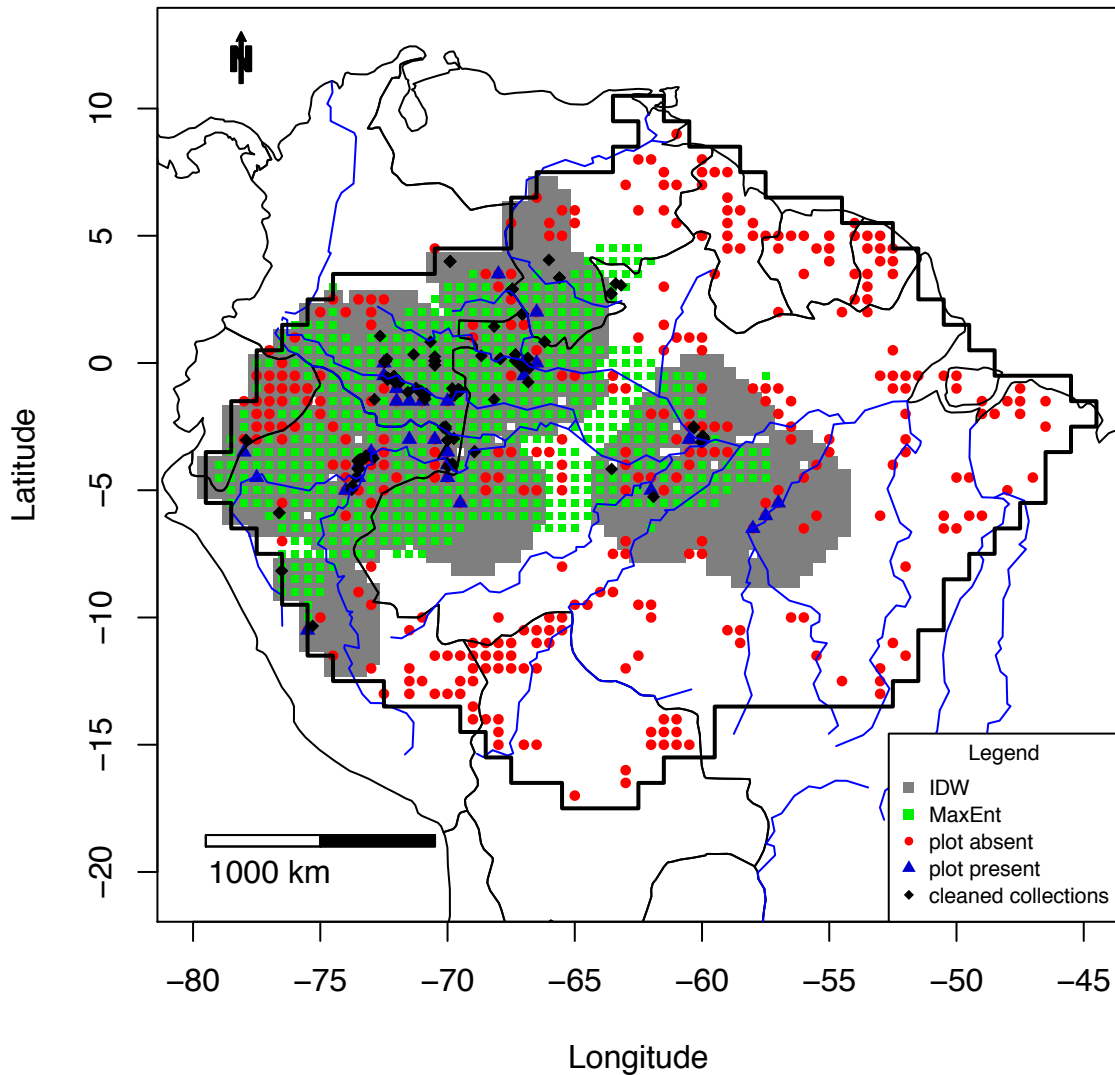

Figure S3\_103B MaxEnt map of *Micrandra\_spruceana*

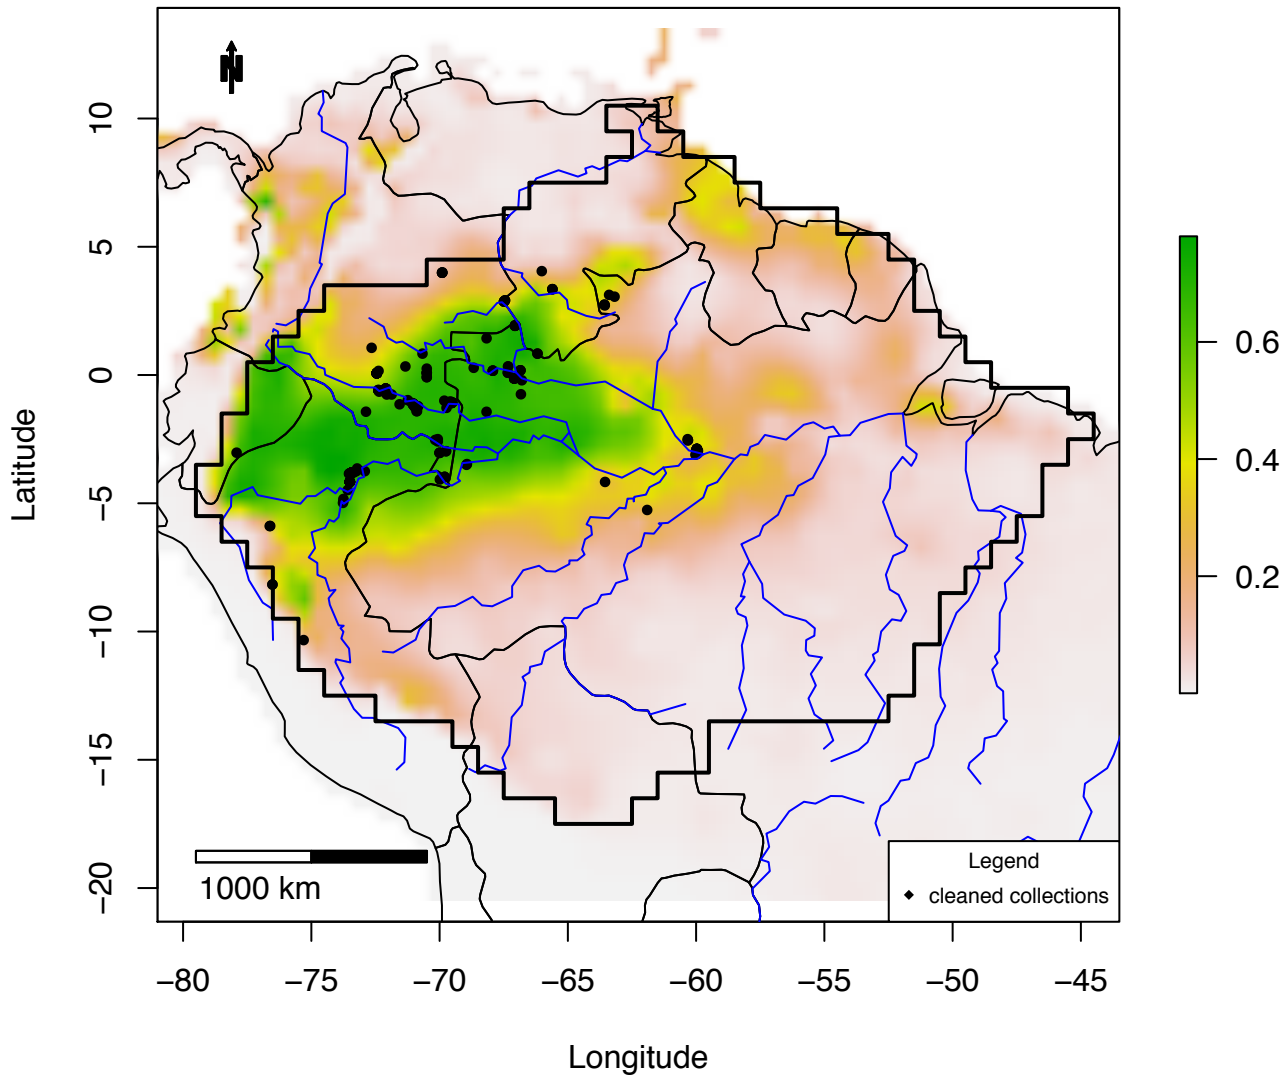

Figure S3\_103C IDW map of *Micrandra spruceana*:  
plots = 0 – 0.16; IDW: 0 – 0.07

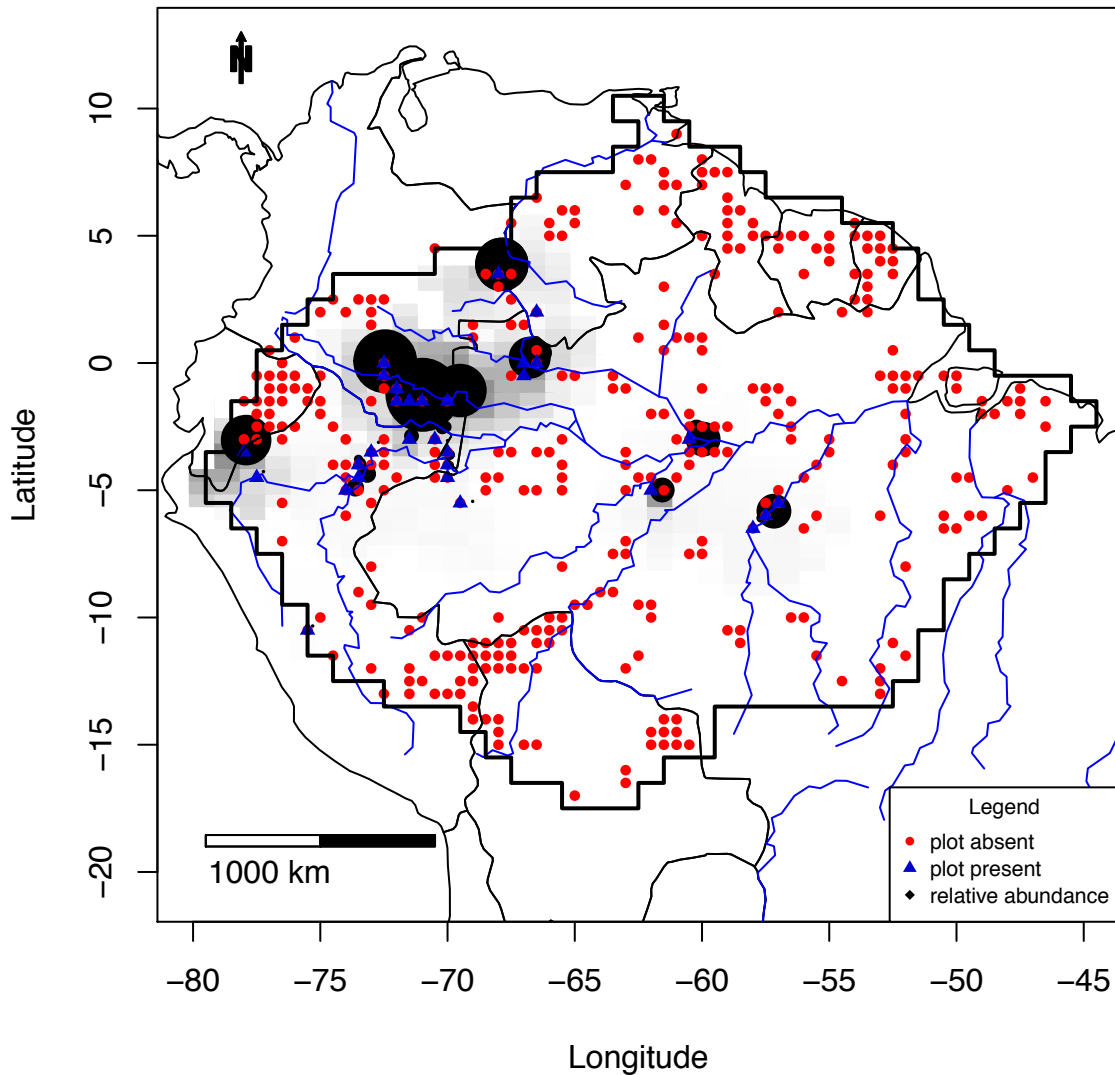

Figure S3\_104A Combined map of *Micrandra\_sprucei*

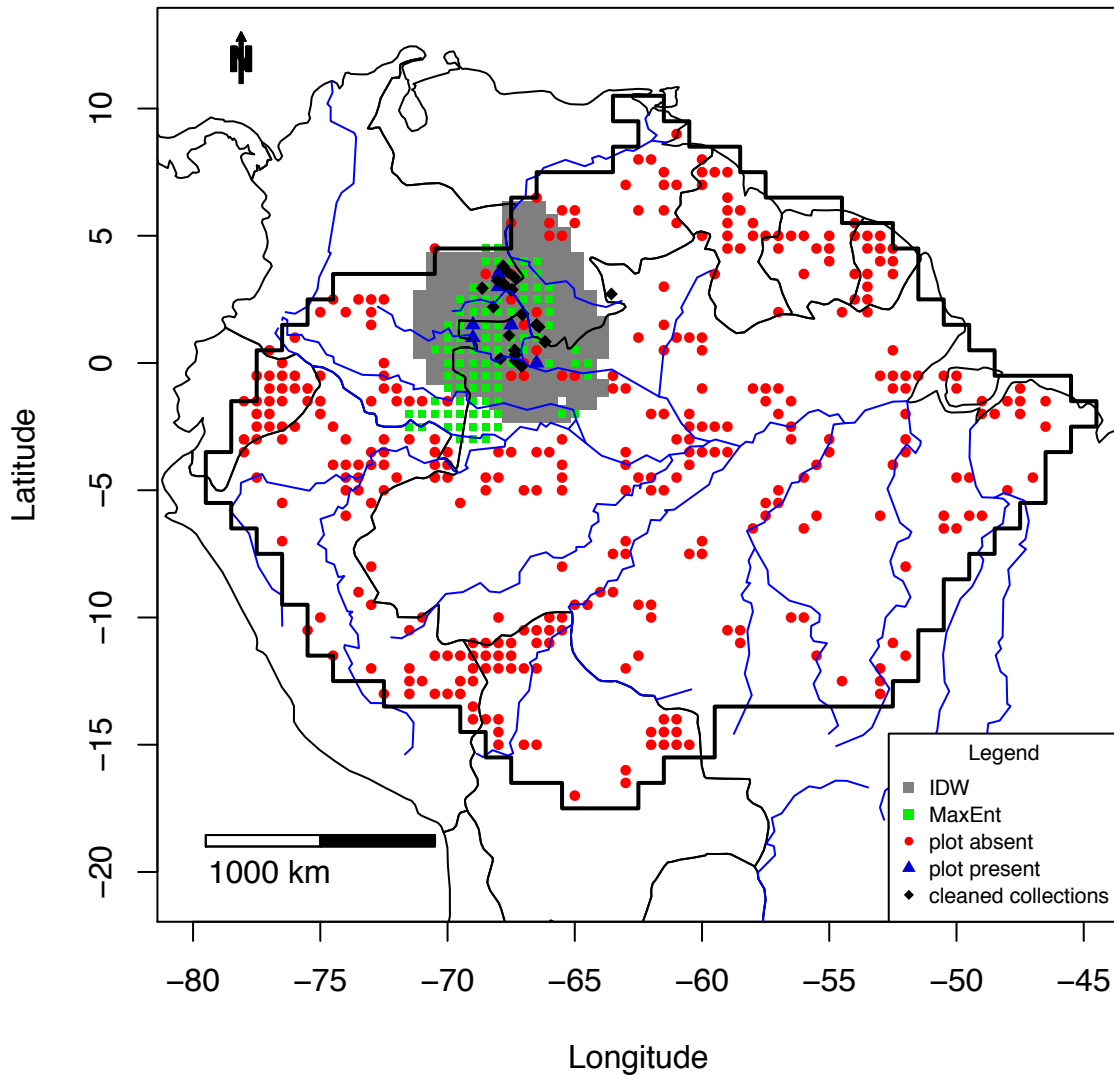

Figure S3\_104B MaxEnt map of *Micrandra\_sprucei*

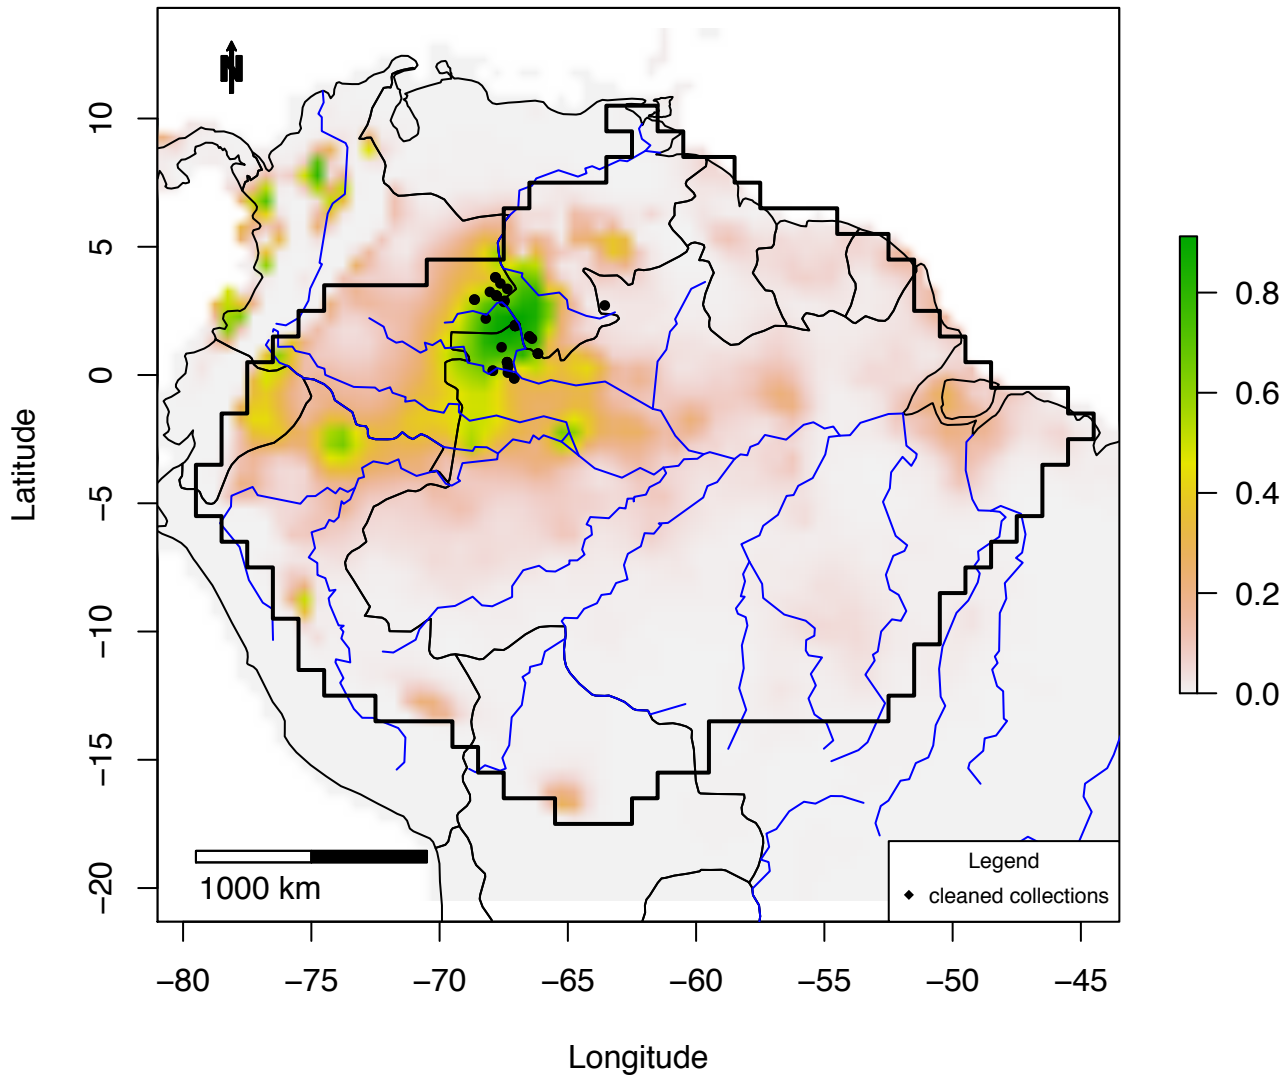



Figure S3\_104C IDW map of *Micrandra sprucei*:  
plots =0 – 0.63; IDW: 0 – 0.24

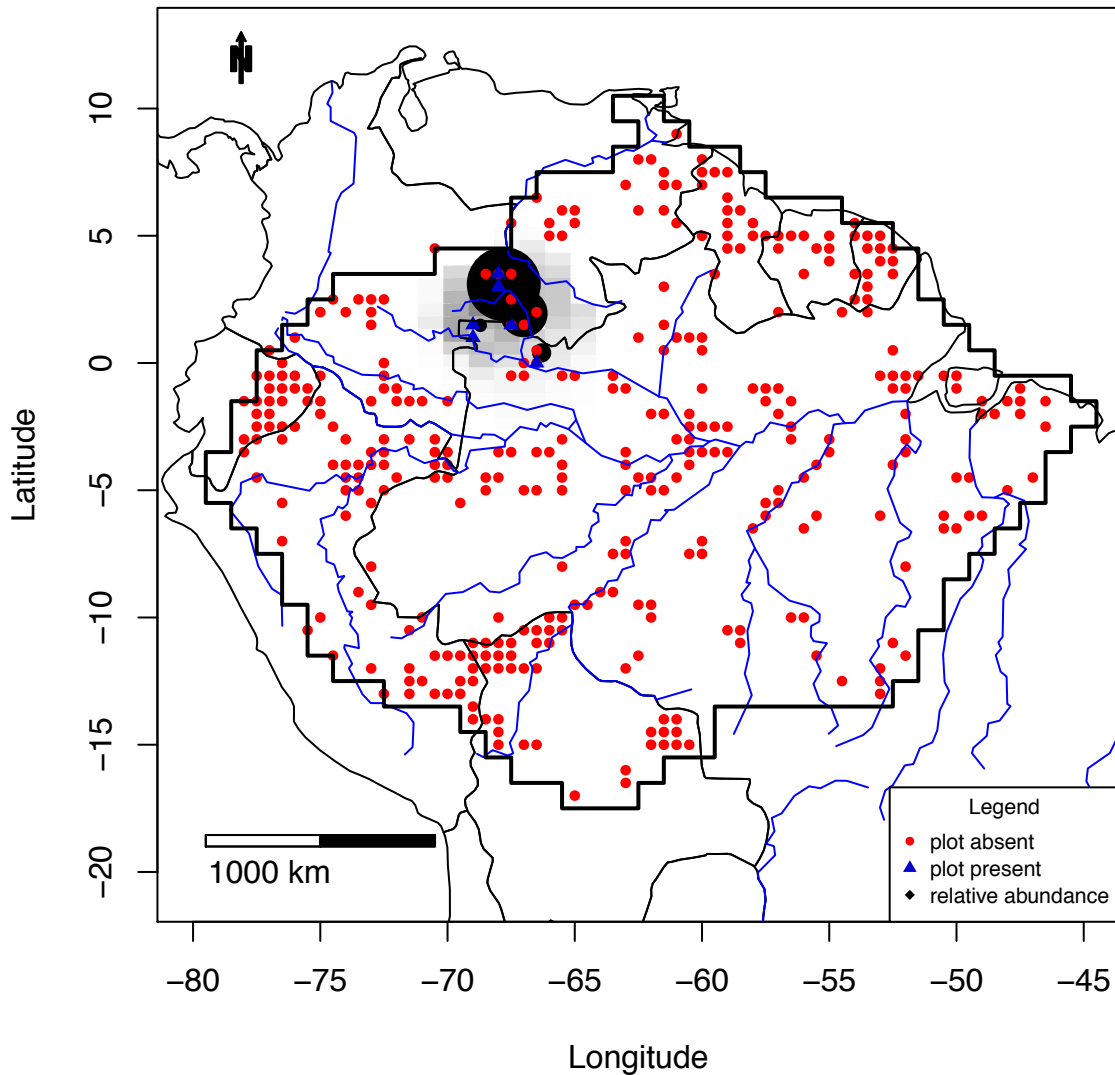

Figure S3\_105A Combined map of *Micropholis\_gardneriana*

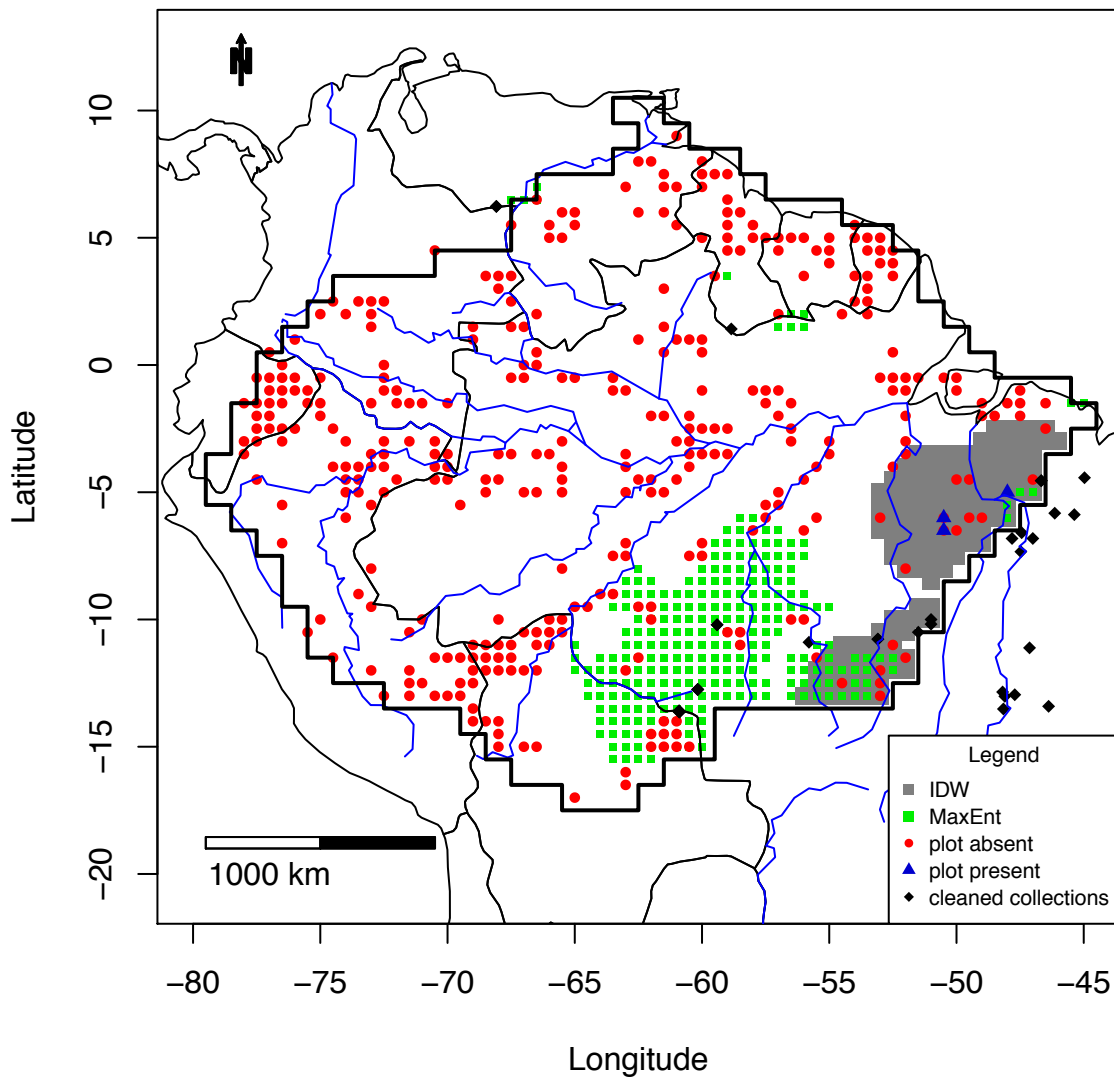

Figure S3\_105B MaxEnt map of *Micropholis\_gardneriana*

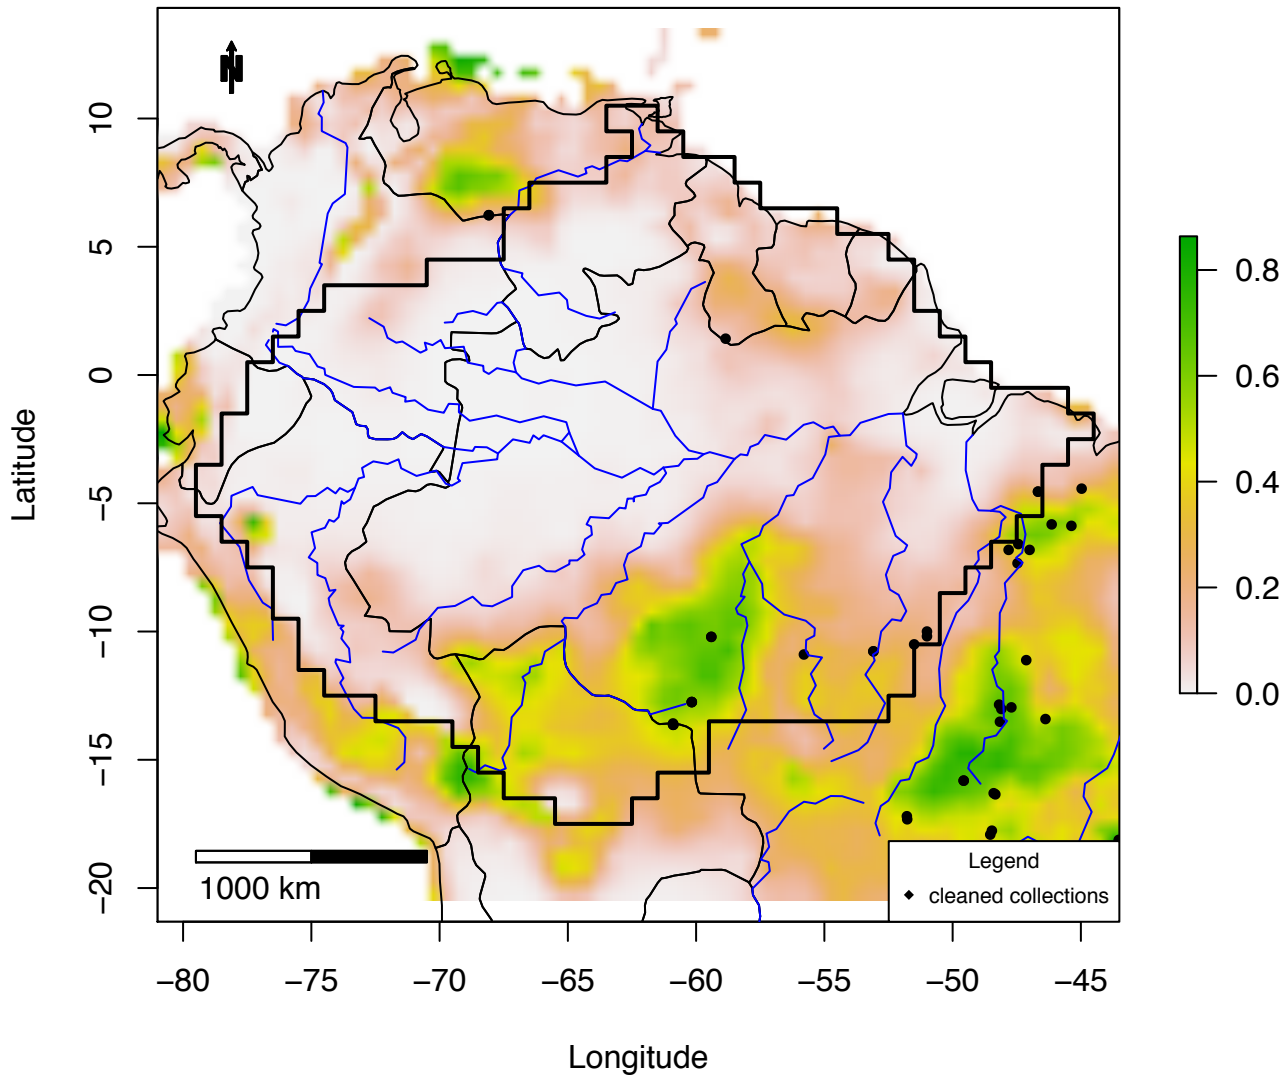

Figure S3\_105C IDW map of *Micropholis\_gardneriana*:  
plots =0 – 0.32; IDW: 0 – 0.06

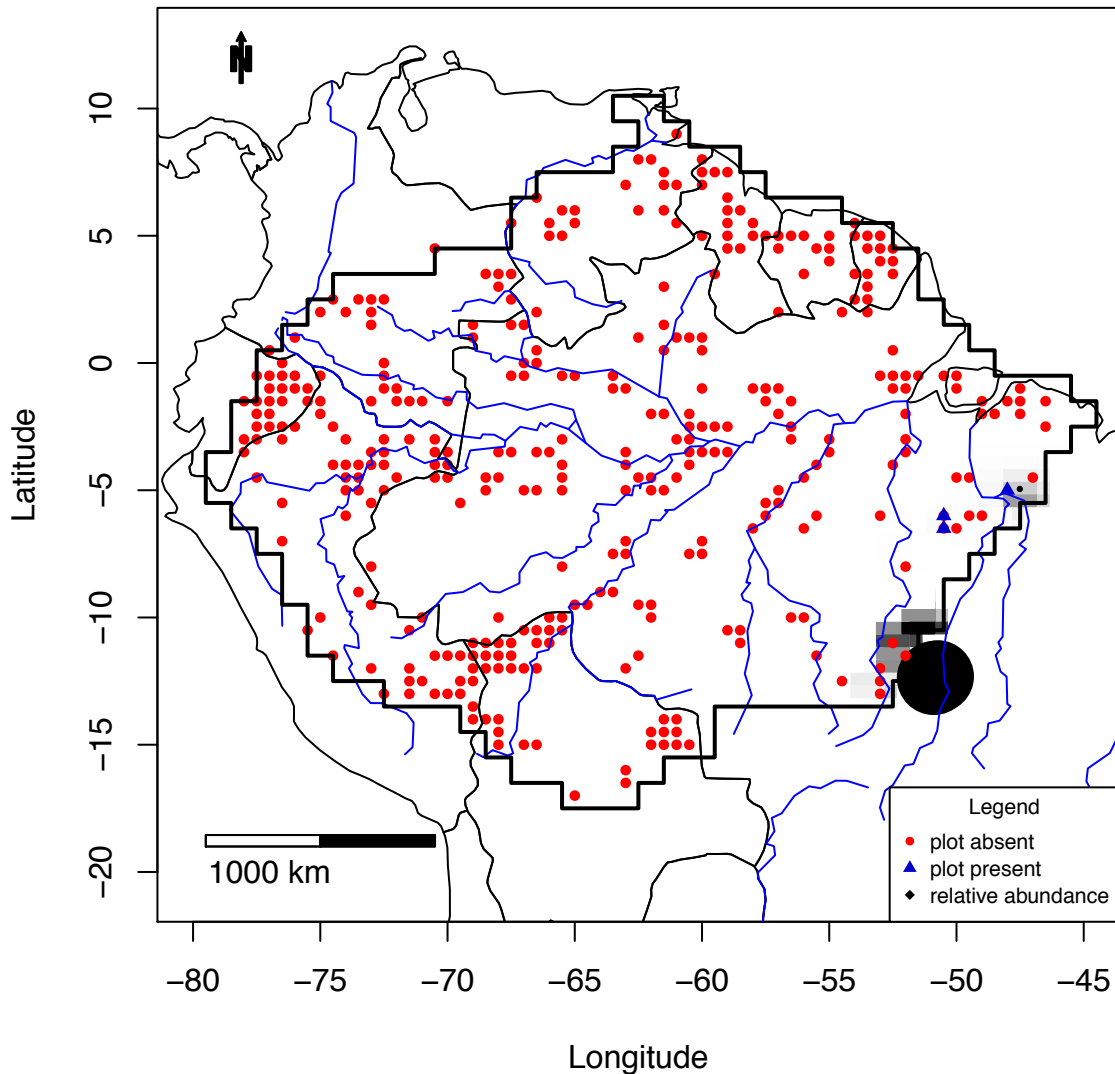

Figure S3\_106A Combined map of *Micropholis\_guyanensis*

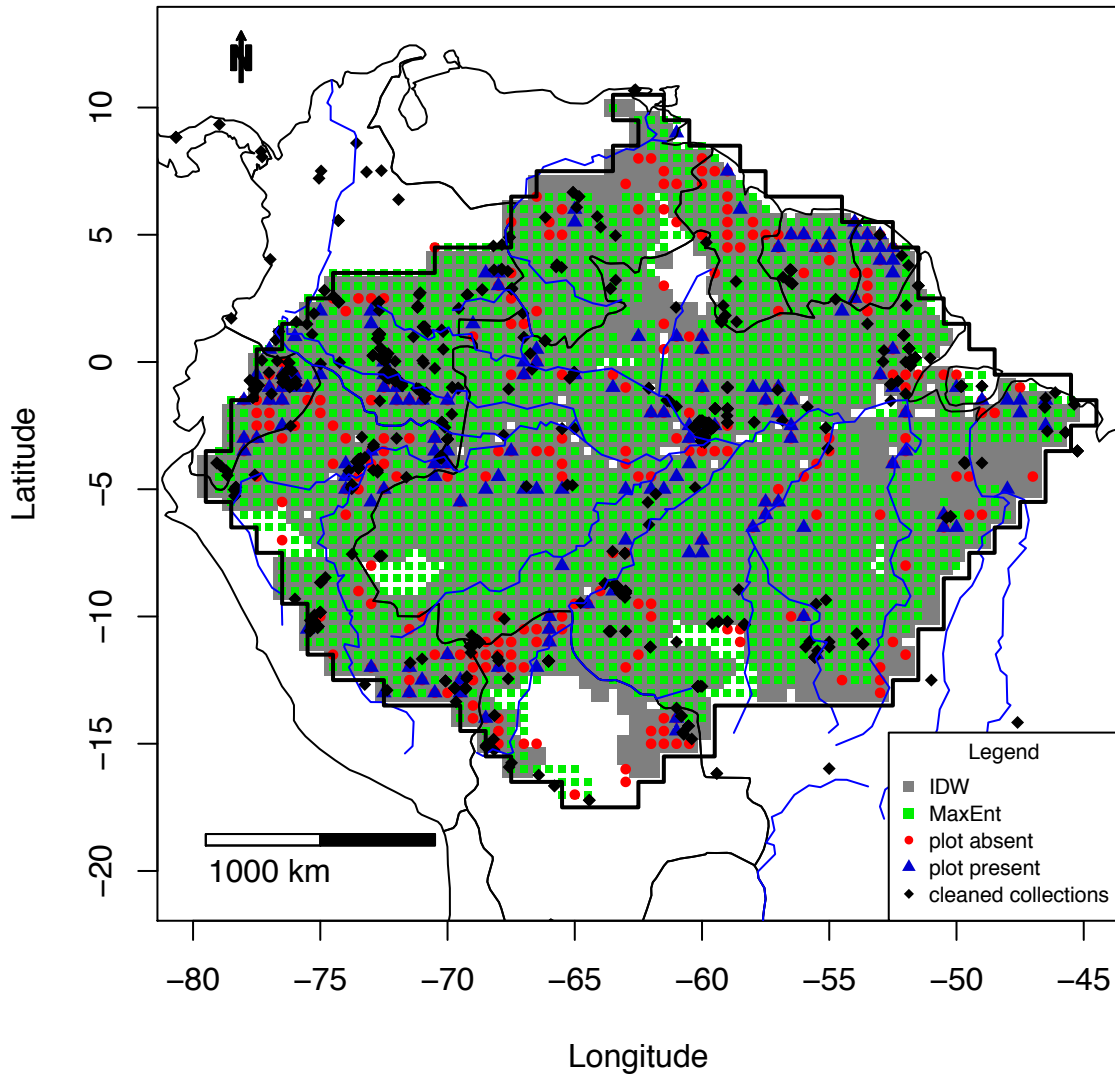

Figure S3\_106B MaxEnt map of *Micropholis\_guyanensis*

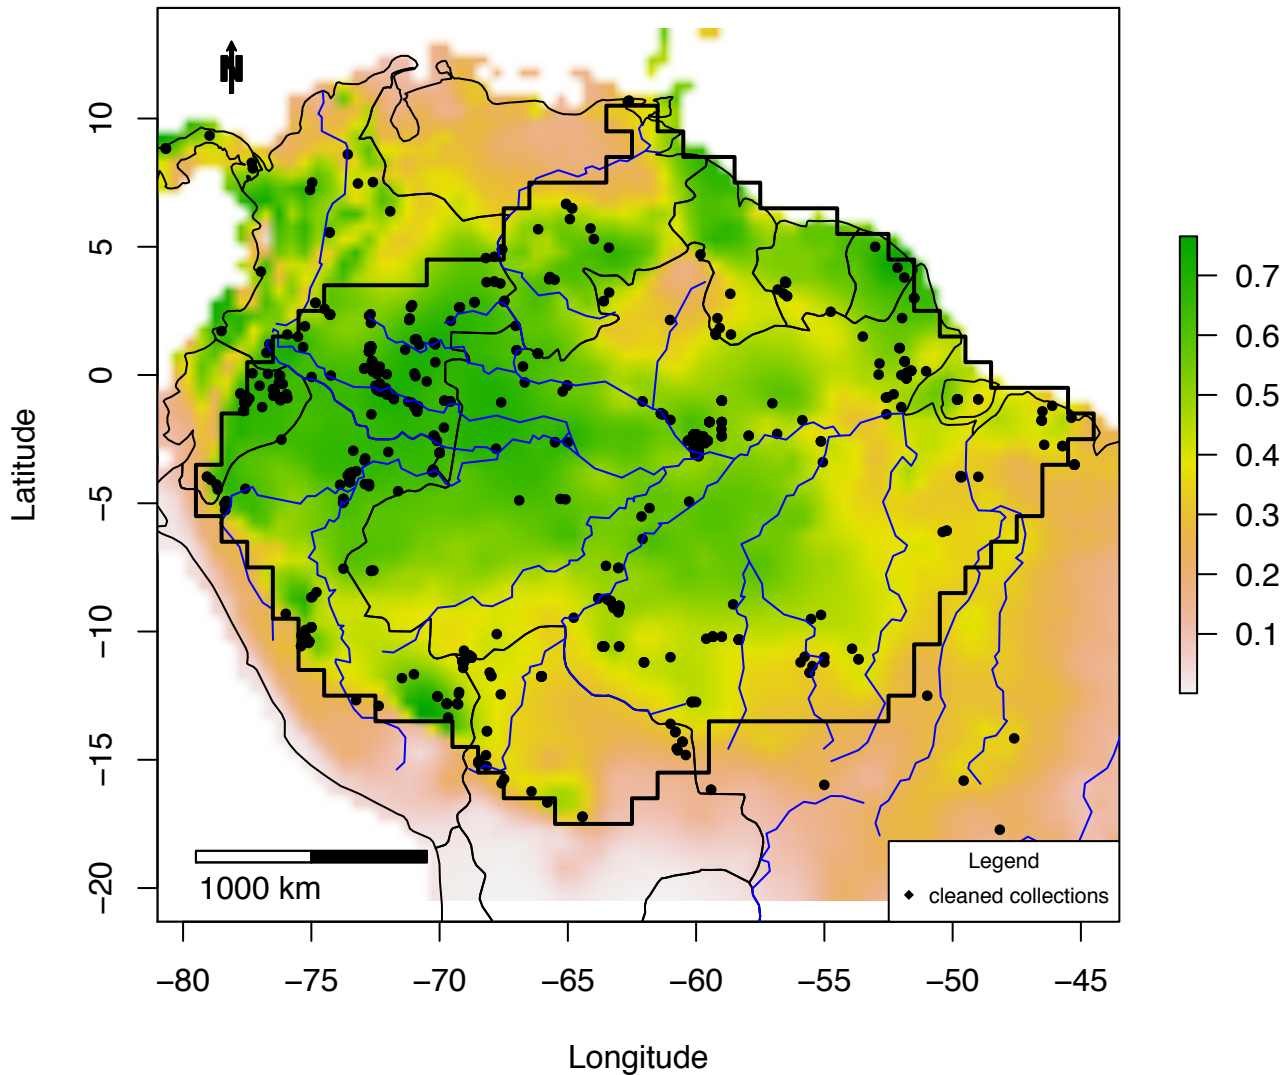

Figure S3\_106C IDW map of *Micropholis\_guyanensis*:  
plots =0 – 0.15; IDW: 0 – 0.06

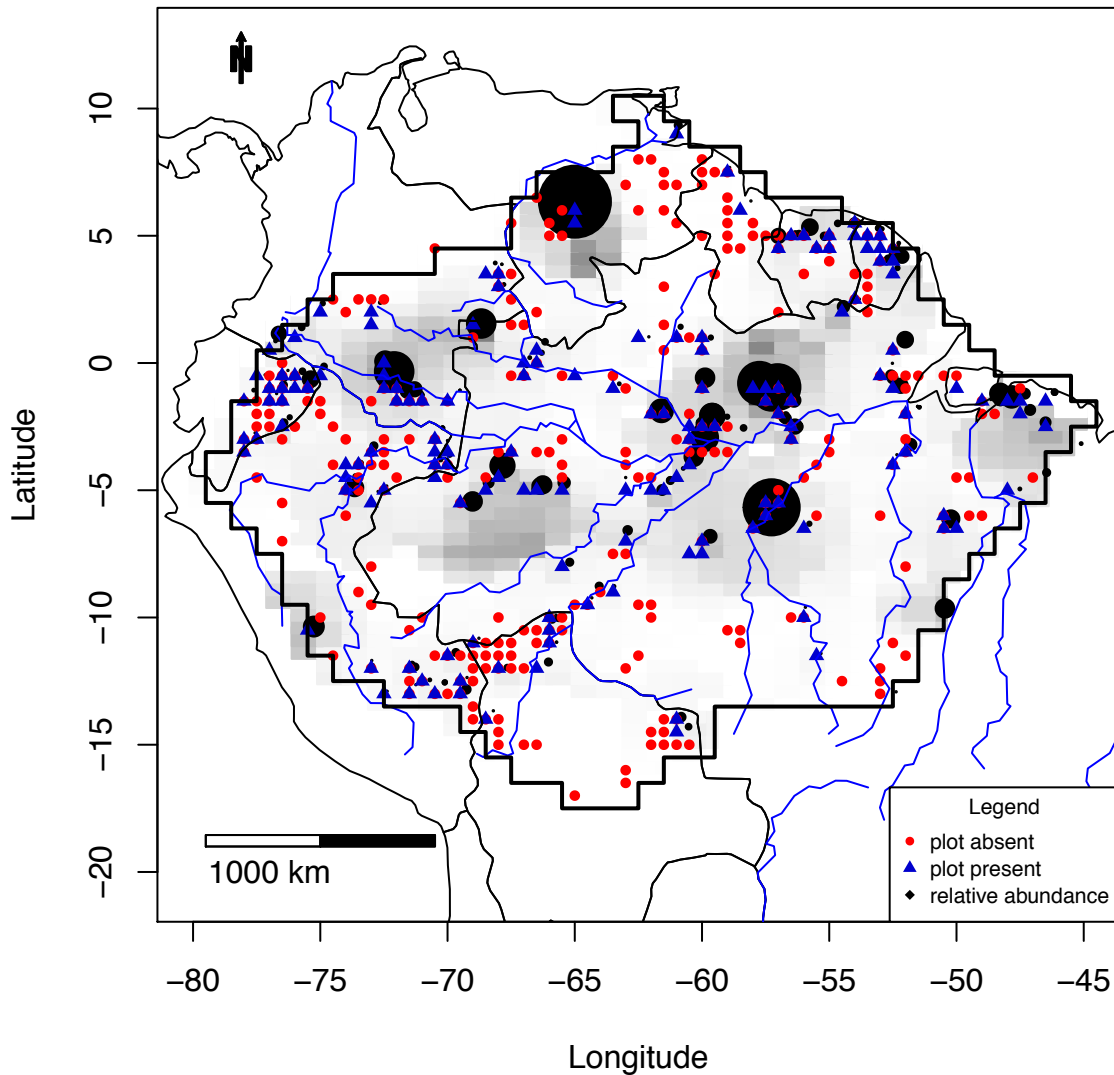

Figure S3\_107A Combined map of *Mimiquartia guianensis*

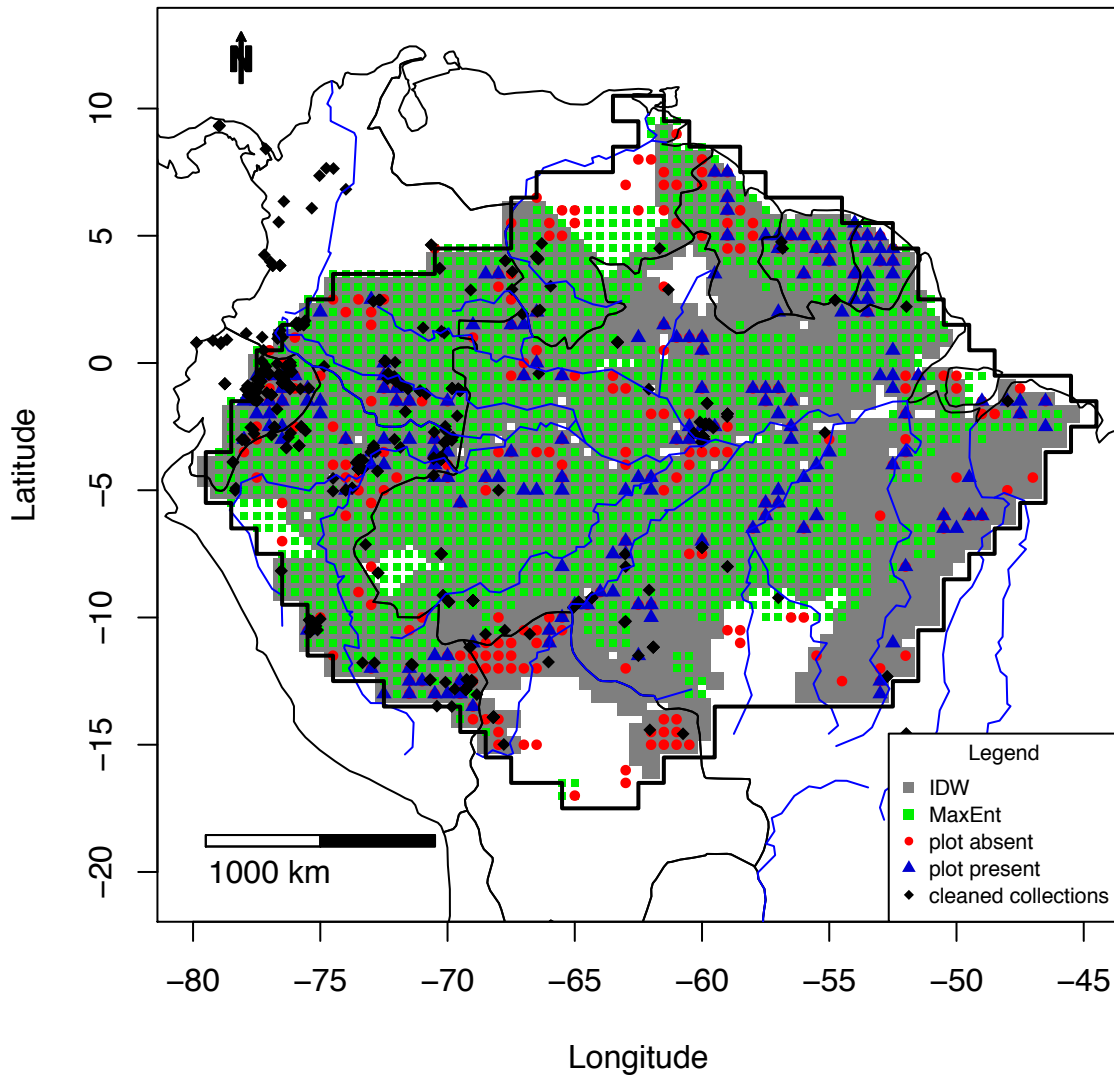



Figure S3\_107B MaxEnt map of *Mimantia guianensis*

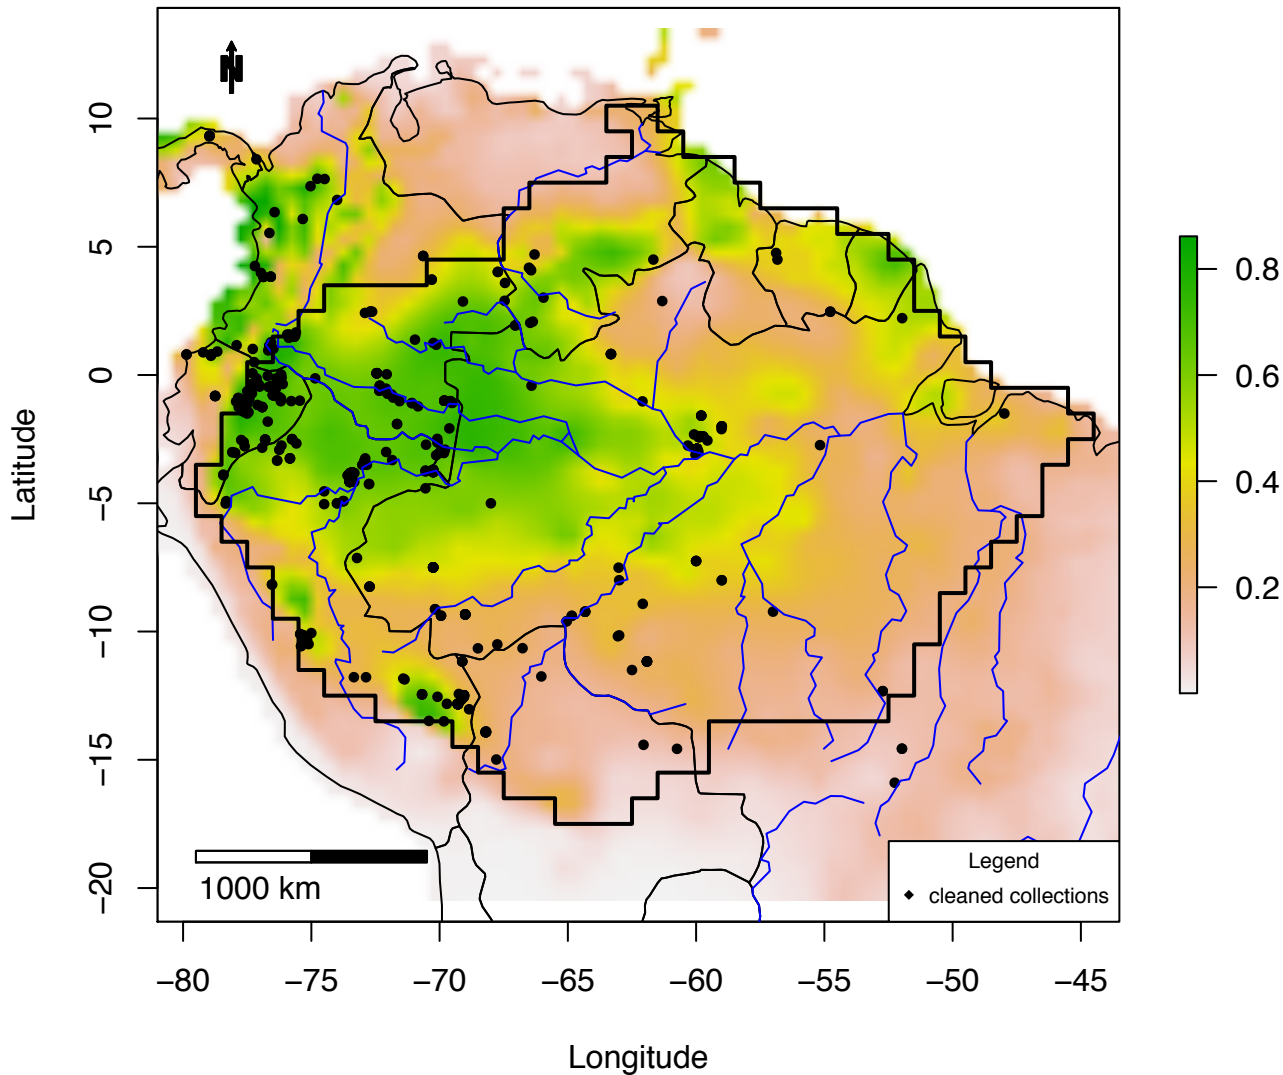

**Figure S3\_107C IDW map of *Minquartia guianensis*:  
plots =0 – 0.07; IDW: 0 – 0.03**

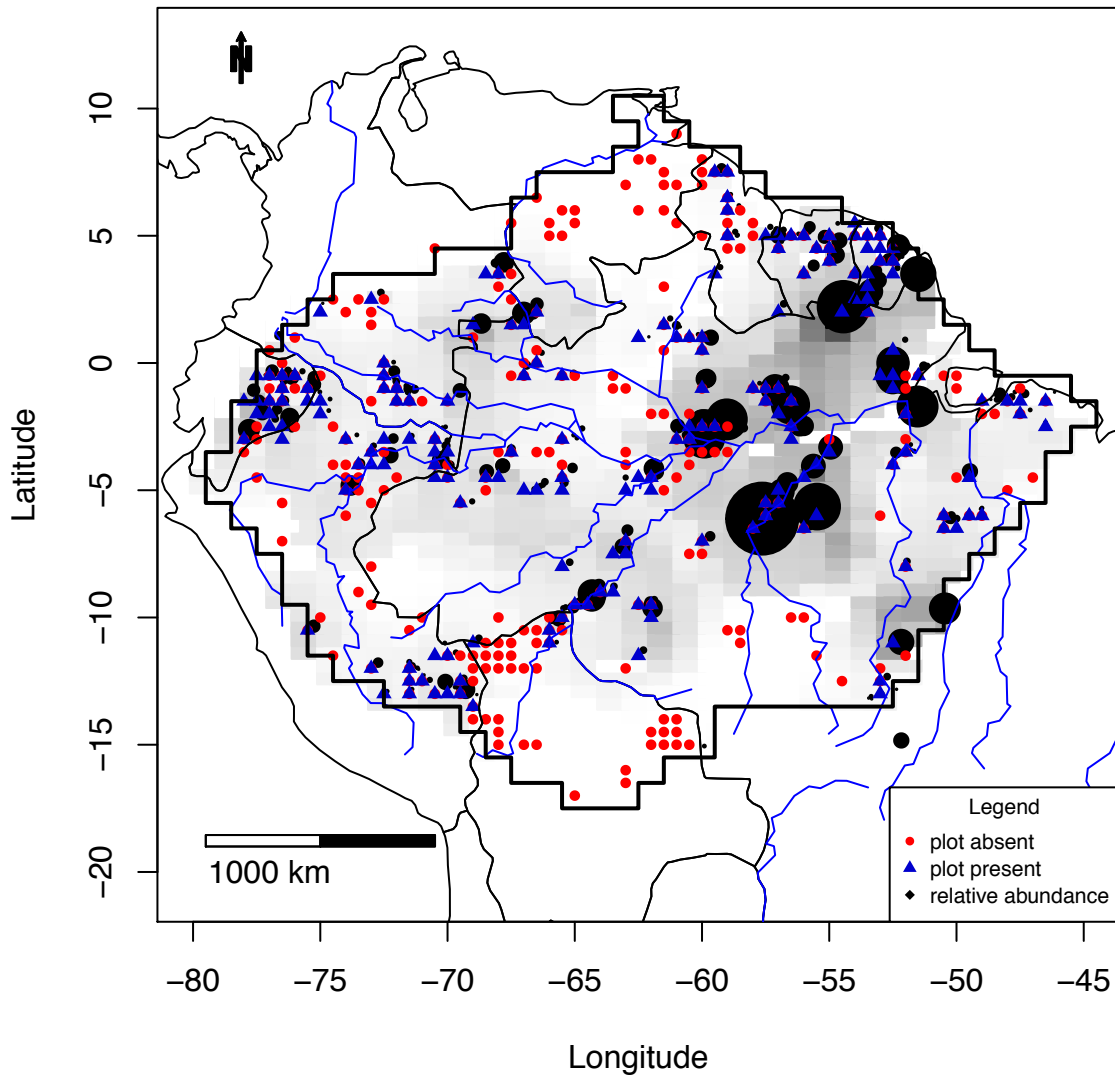

Figure S3\_108A Combined map of *Mollia\_gracilis*

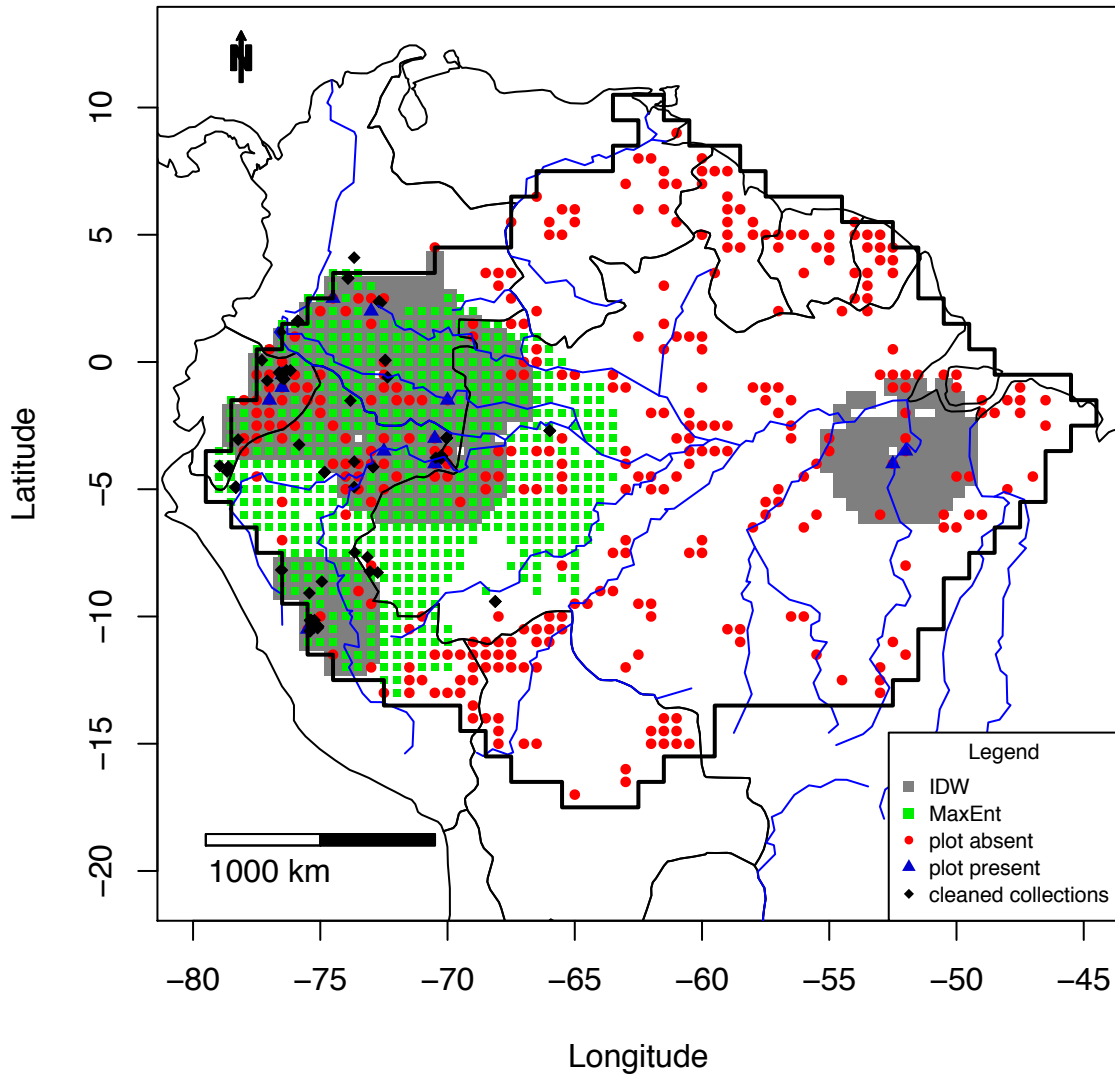

Figure S3\_108B MaxEnt map of *Mollia\_gracilis*

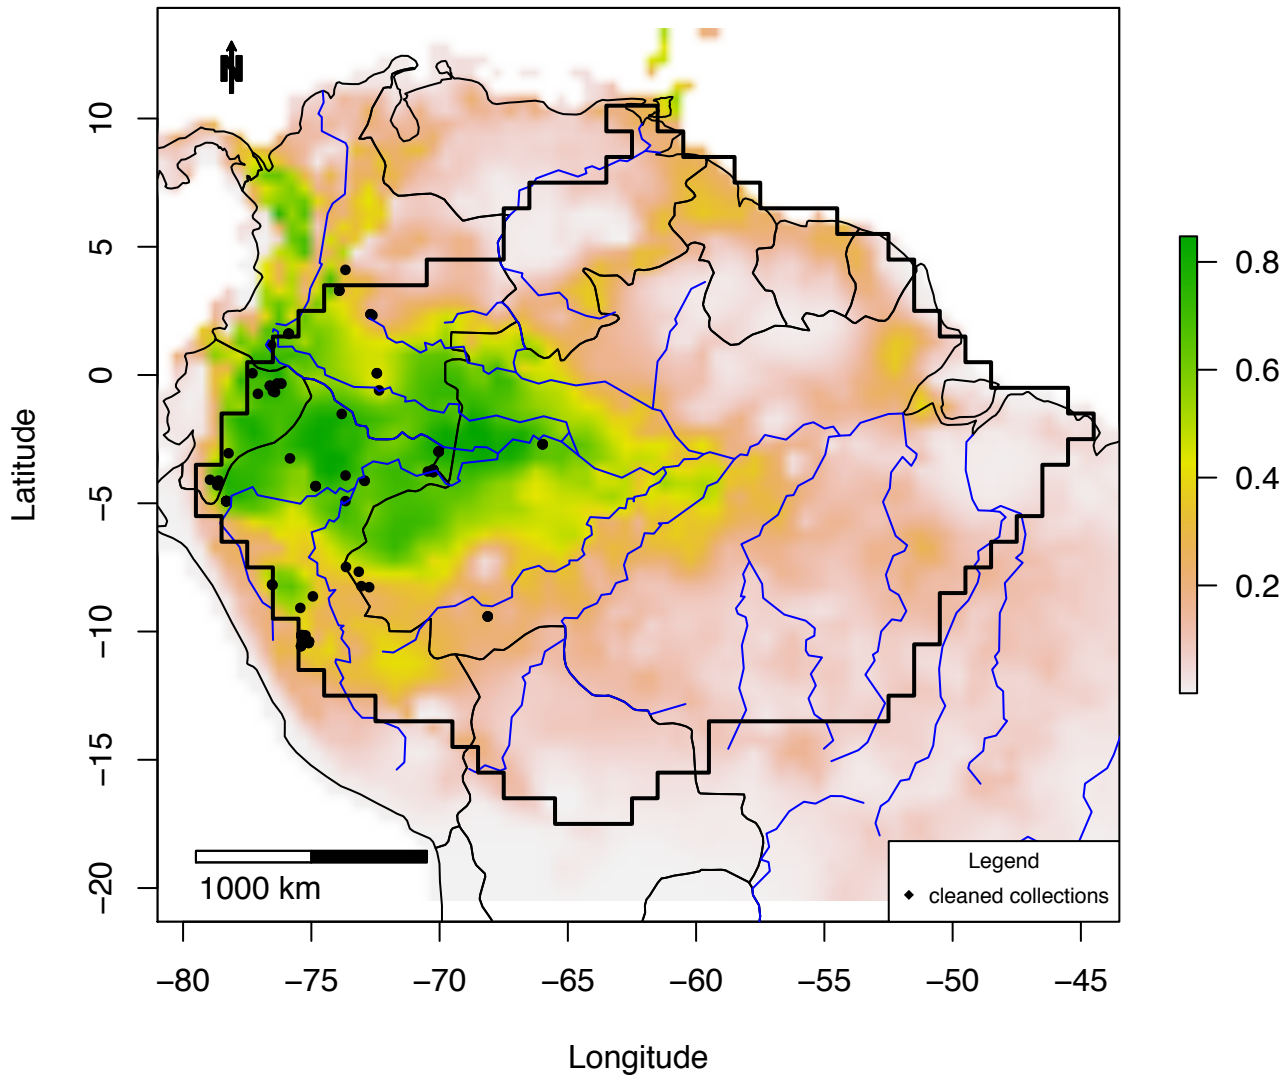

**Figure S3\_108C IDW map of *Mollia gracilis*:**  
**plots =0 – 0.21; IDW: 0 – 0.05**

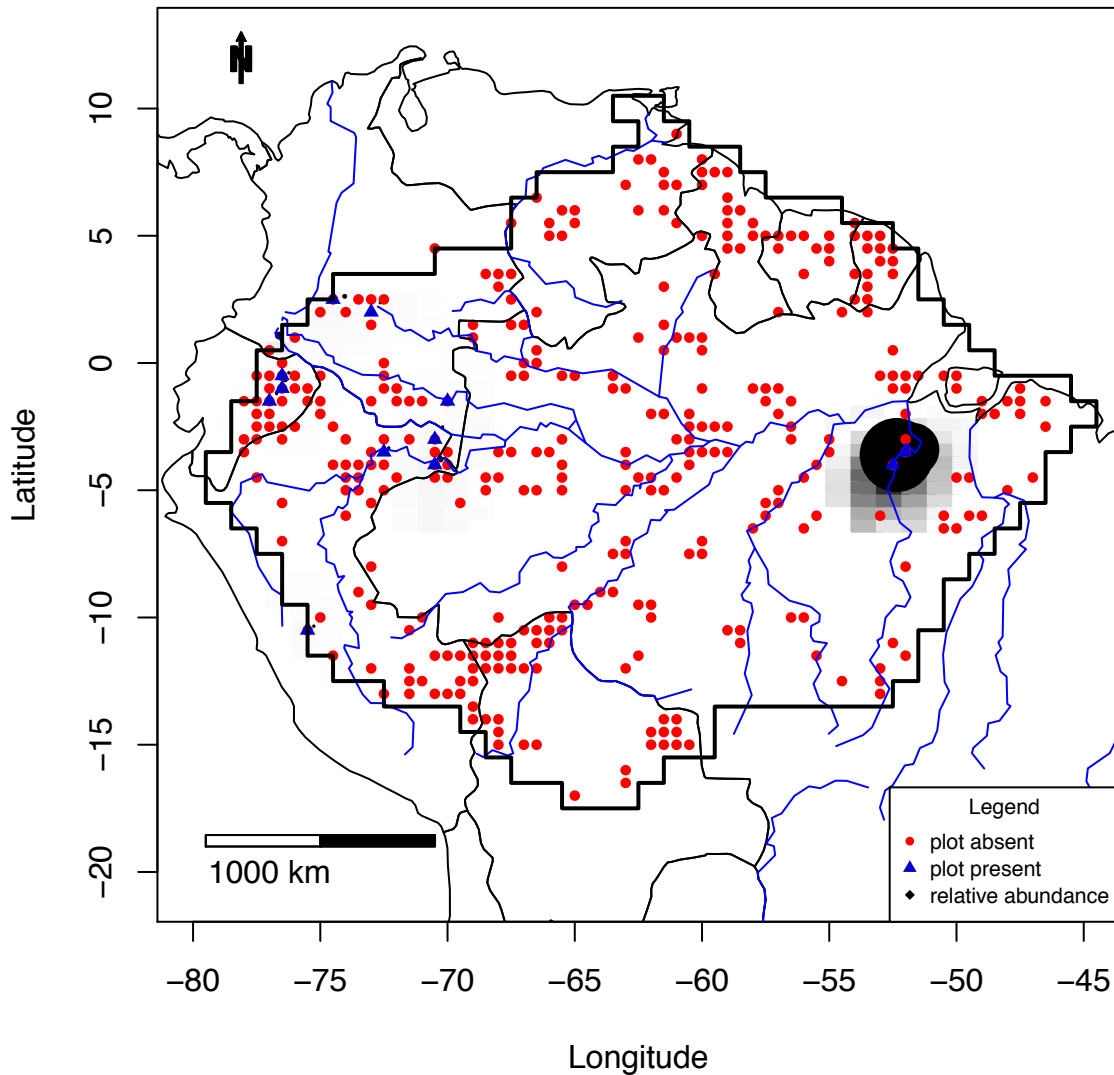

Figure S3\_109A Combined map of *Monopteryx\_uaucu*

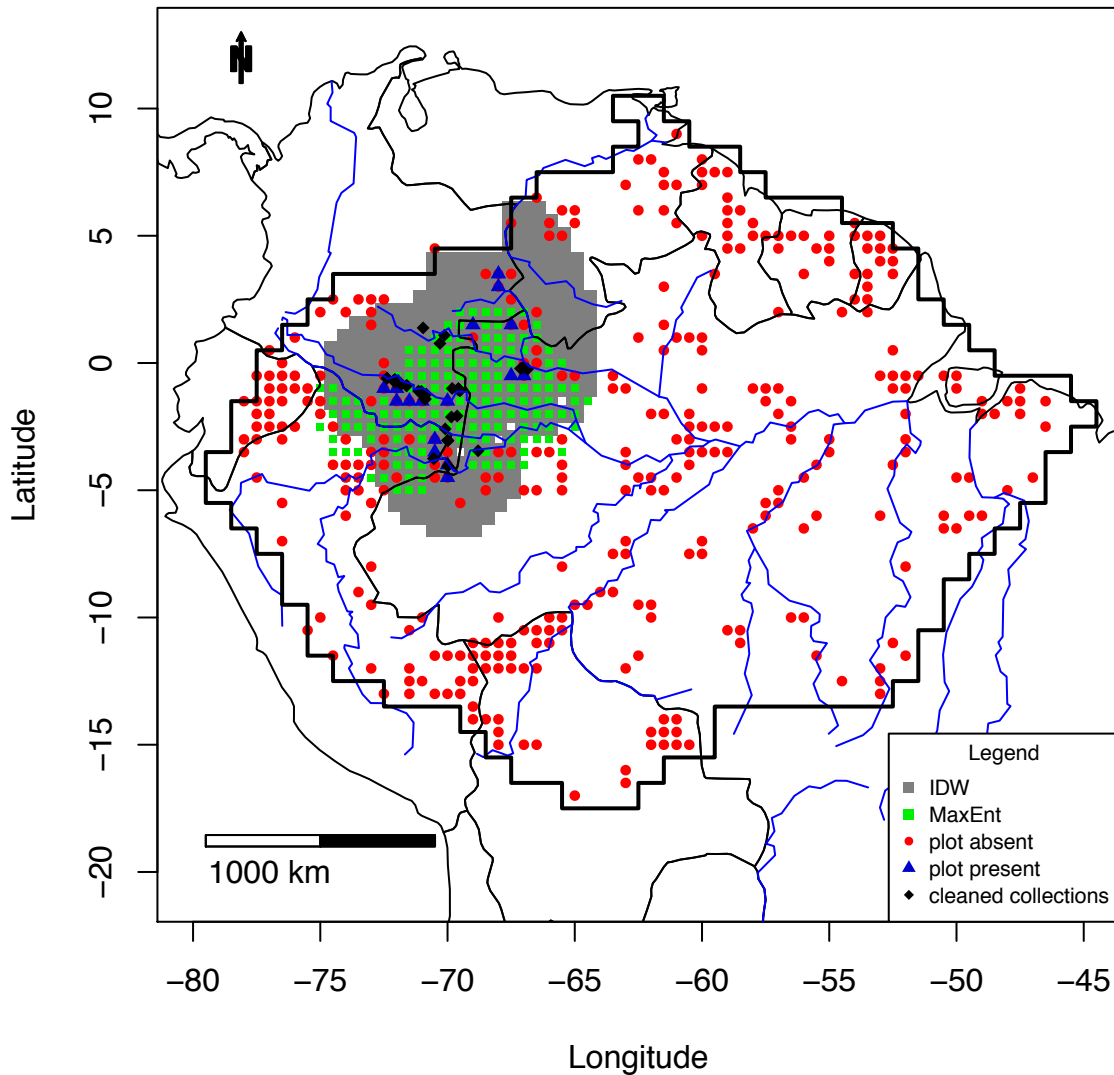

Figure S3\_109B MaxEnt map of *Monopteryx\_uaucu*

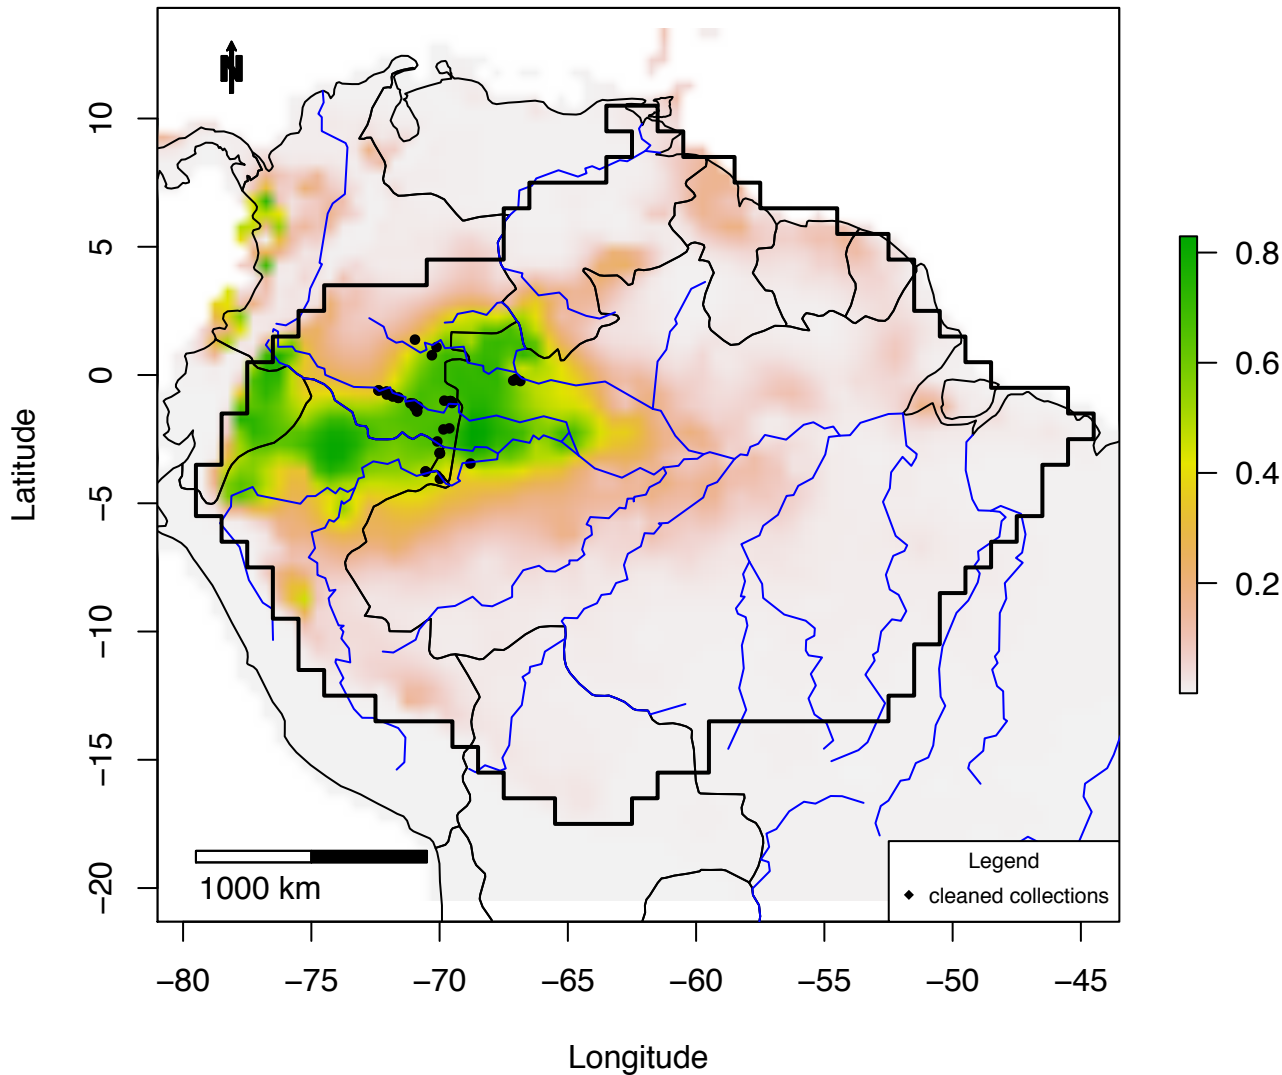

**Figure S3\_109C IDW map of *Monopteryx uaucu*:  
plots =0 – 0.42; IDW: 0 – 0.1**

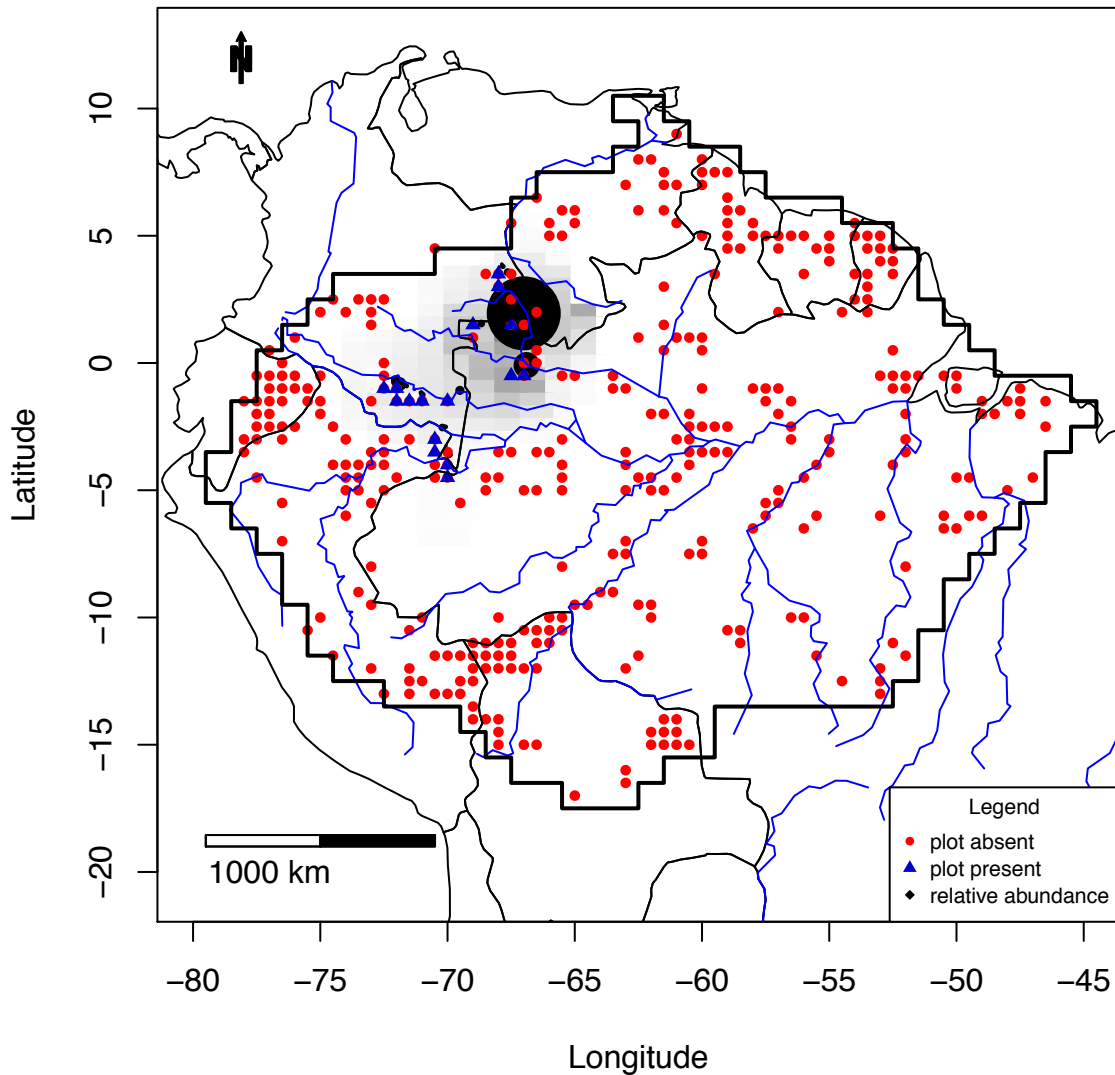



Figure S3\_110A Combined map of *Mora excelsa*

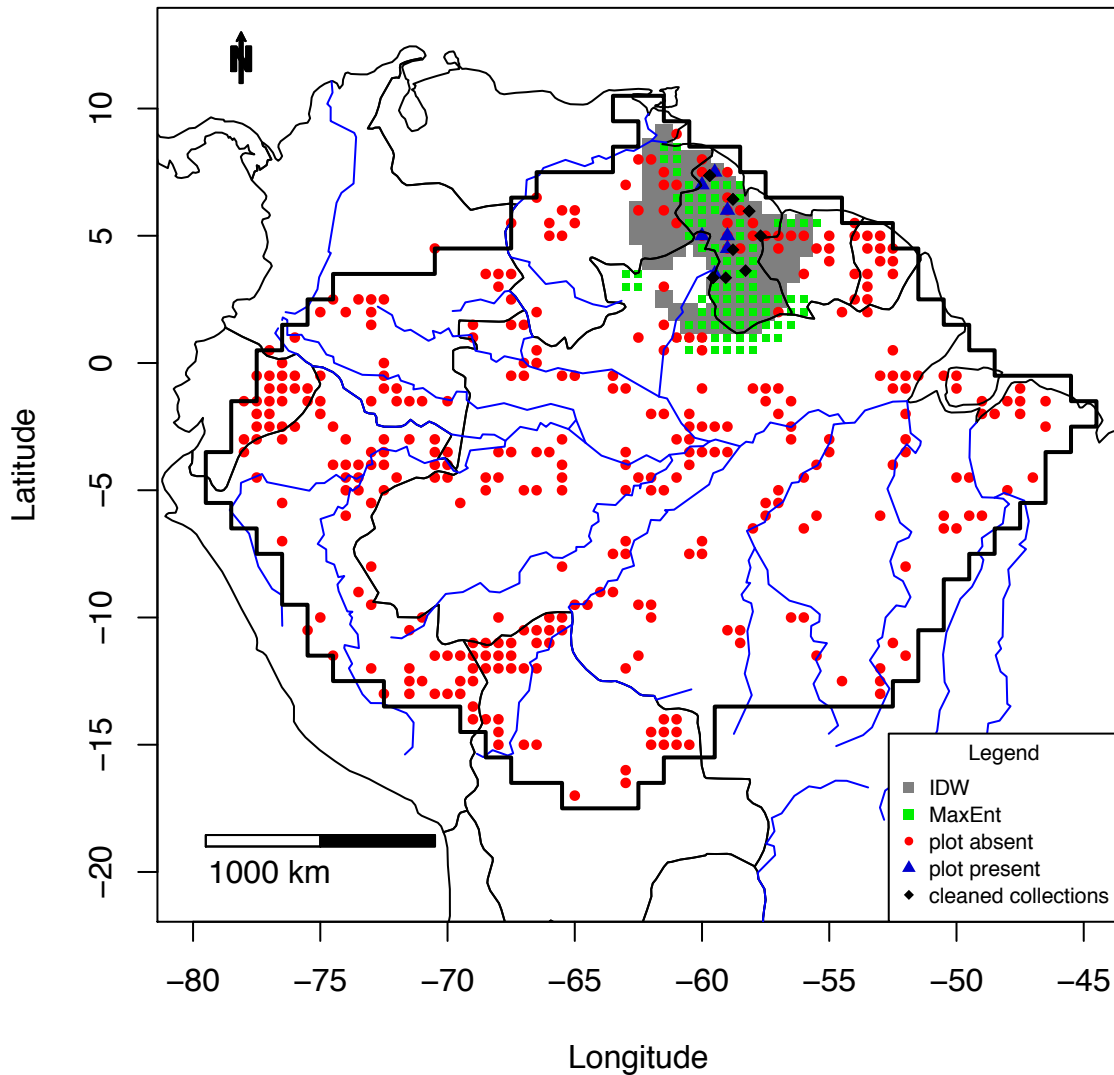

Figure S3\_110B MaxEnt map of *Mora excelsa*

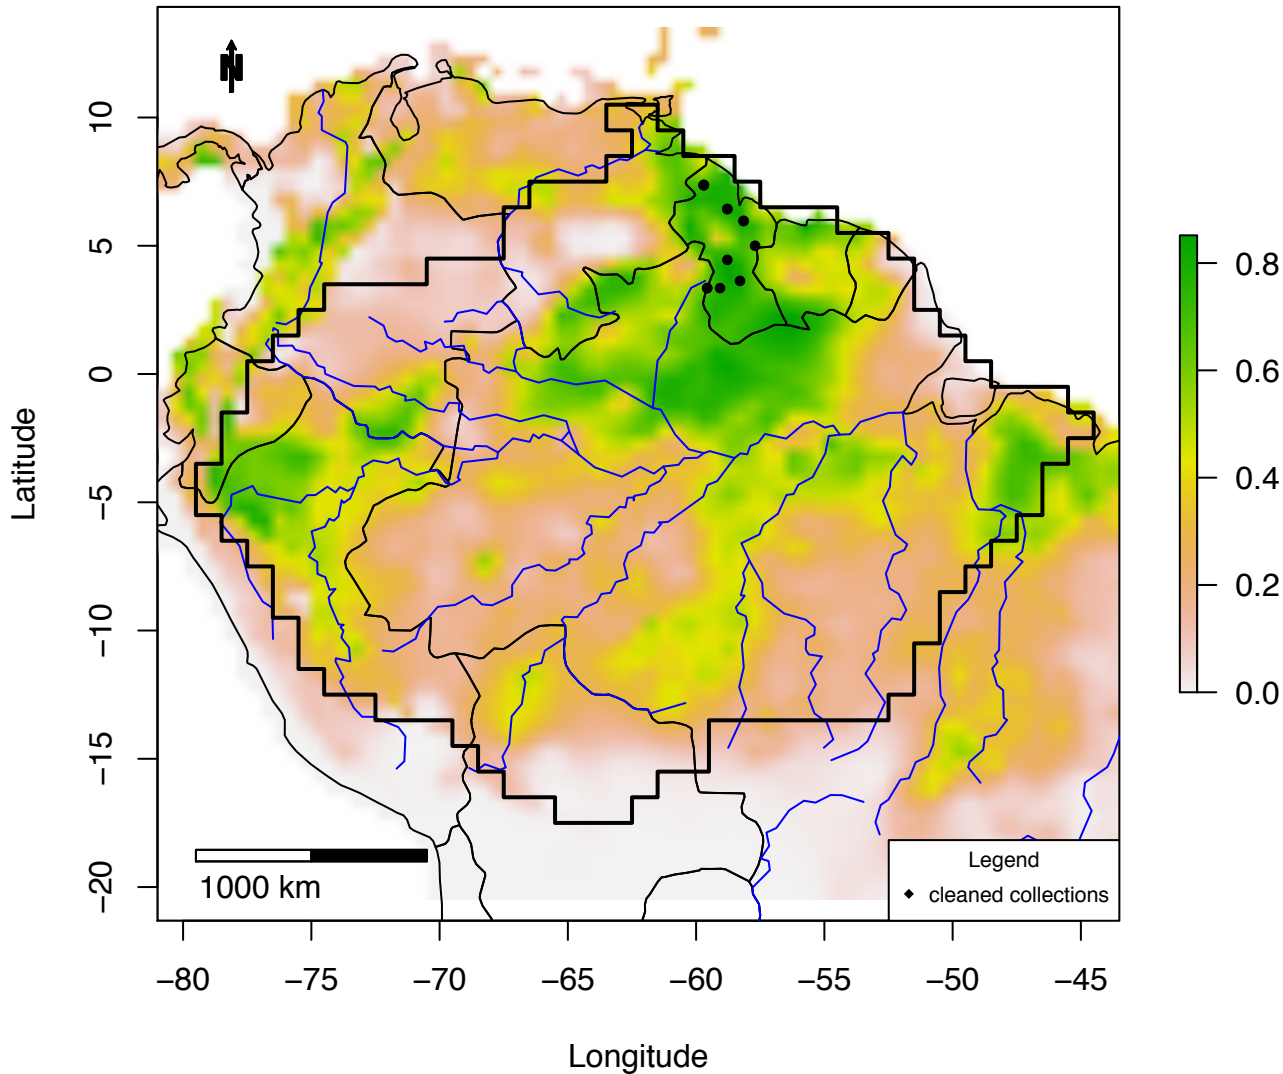

Figure S3\_110C IDW map of *Mora excelsa*:  
plots = 0 – 0.59; IDW: 0 – 0.13

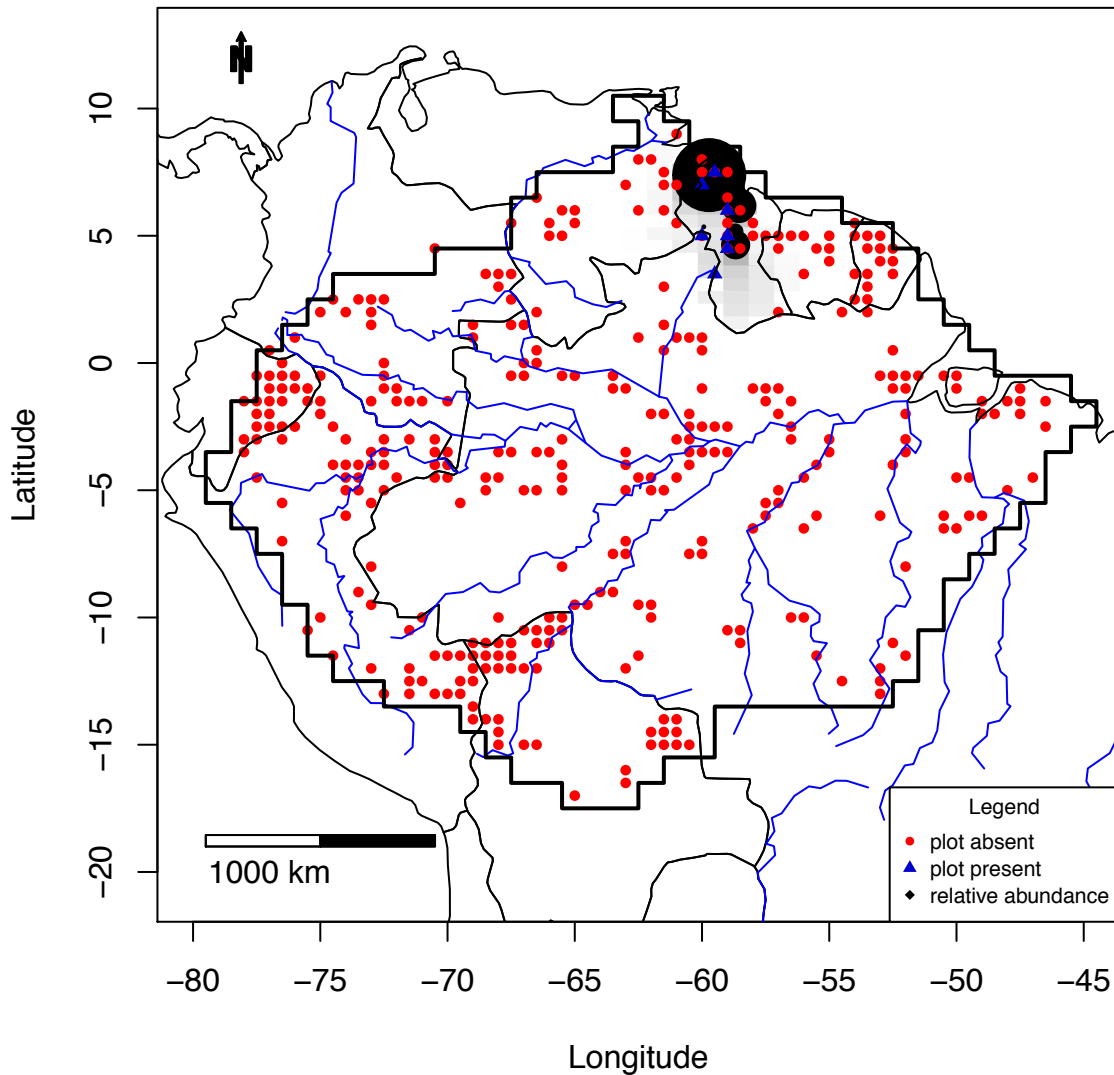

Figure S3\_111A Combined map of *Ocotea\_aciphylla*

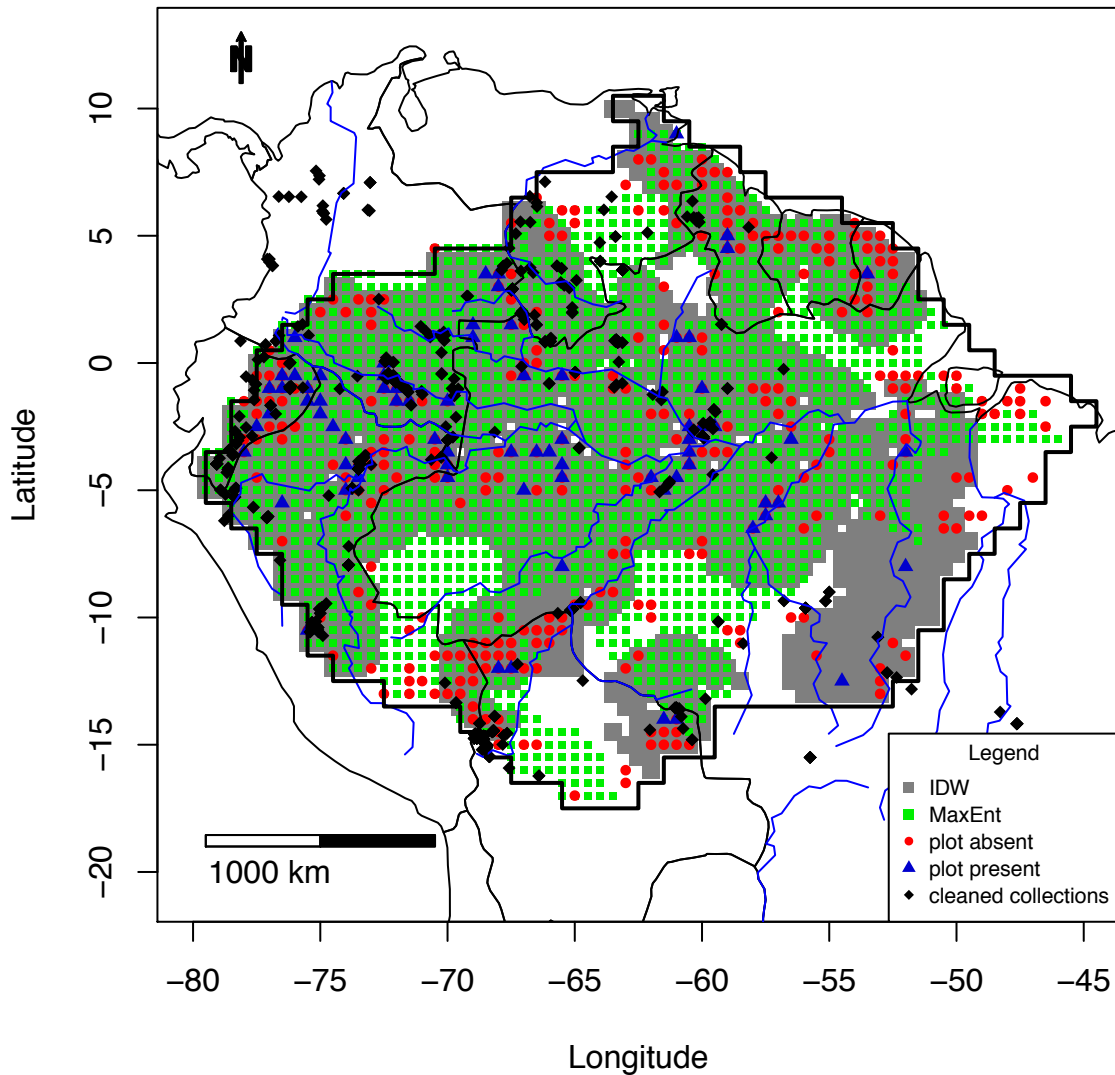

Figure S3\_111B MaxEnt map of *Ocotea\_aciphylla*

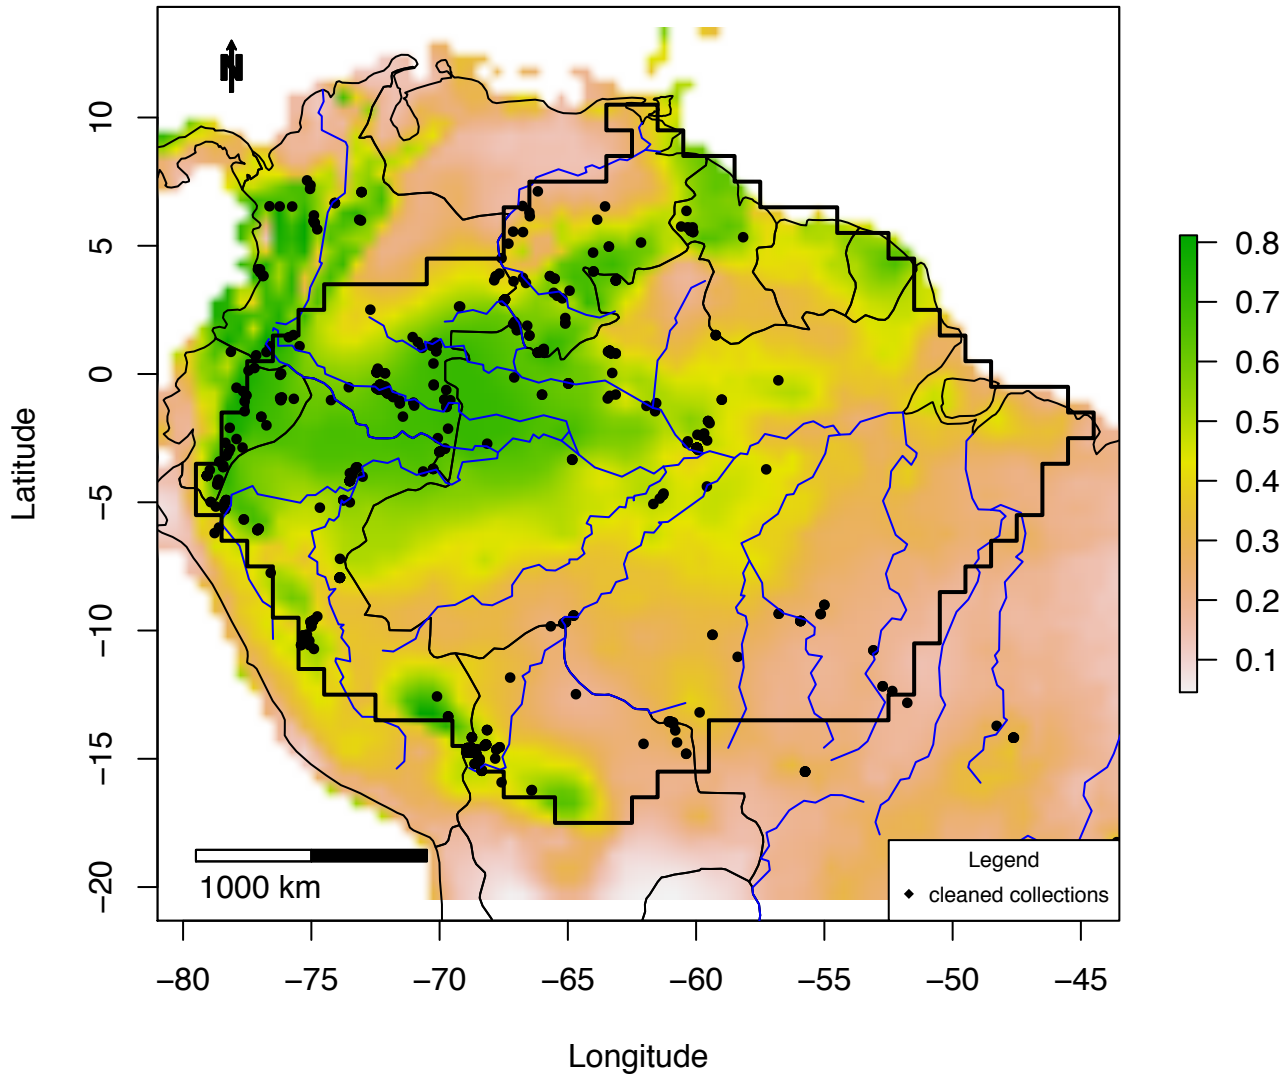

Figure S3\_111C IDW map of *Ocotea\_aciphylla*:  
plots =0 – 0.16; IDW: 0 – 0.05

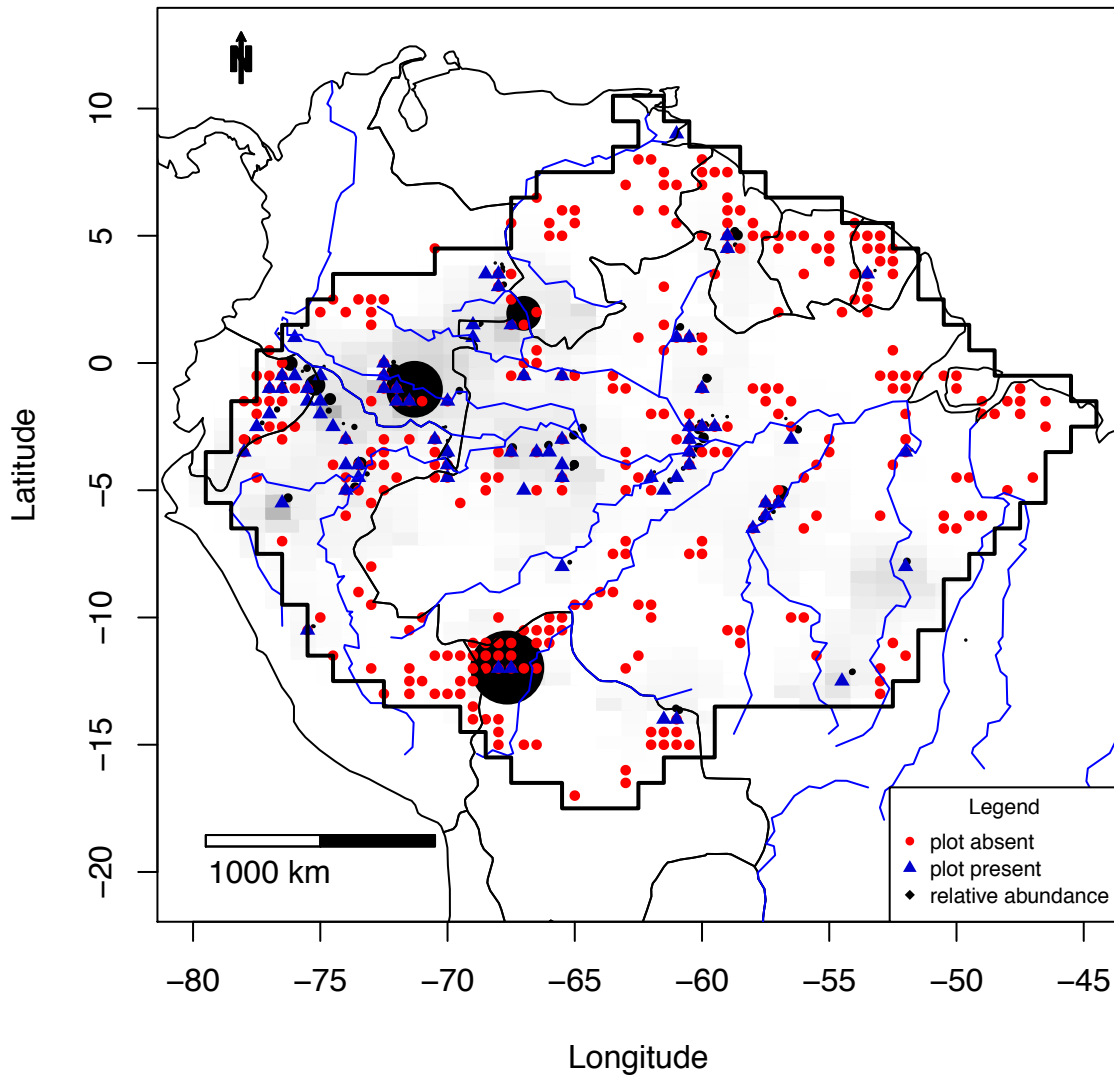

Figure S3\_112A Combined map of *Ocotea\_cernua*

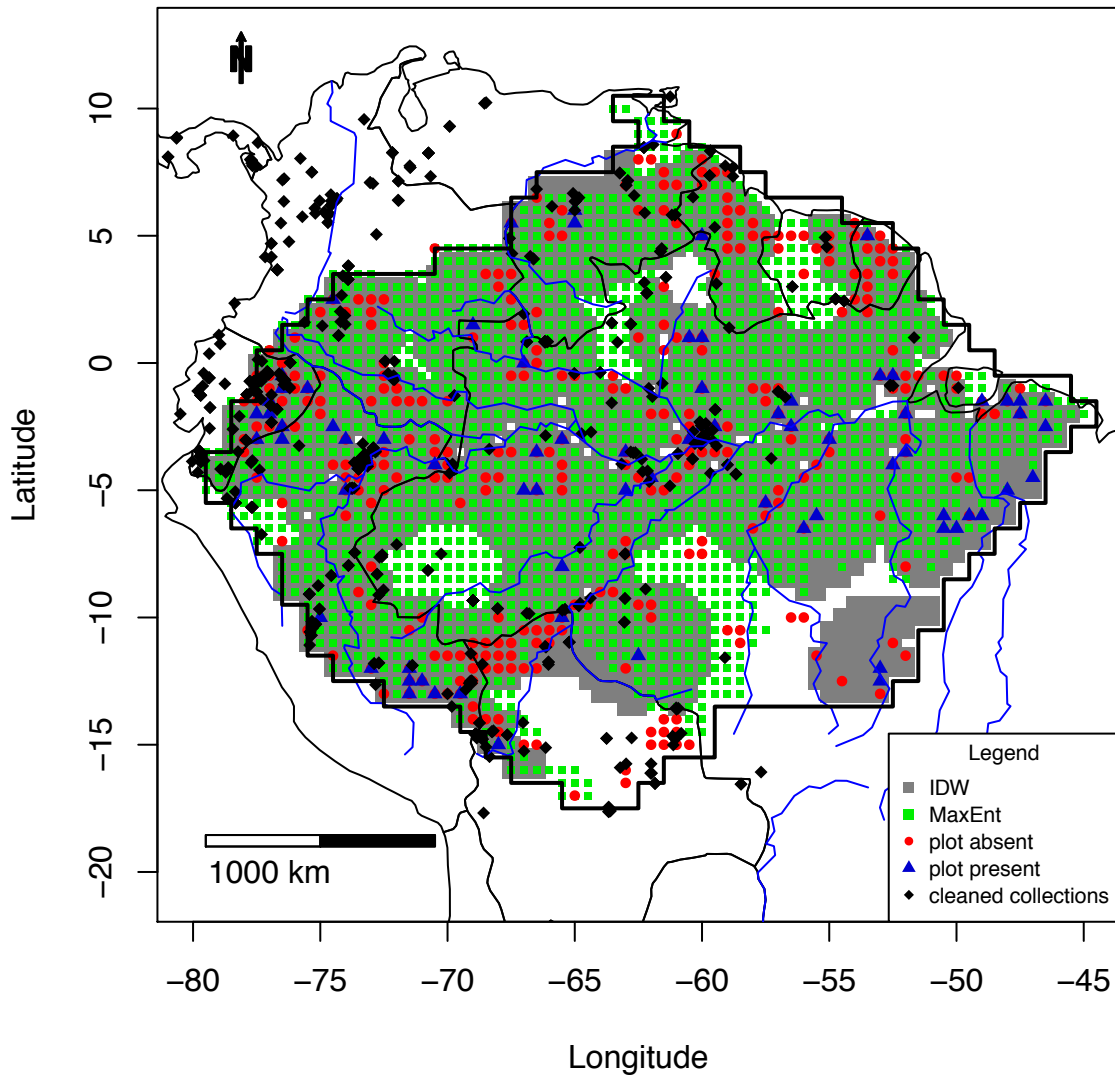

Figure S3\_112B MaxEnt map of *Ocotea\_cernua*

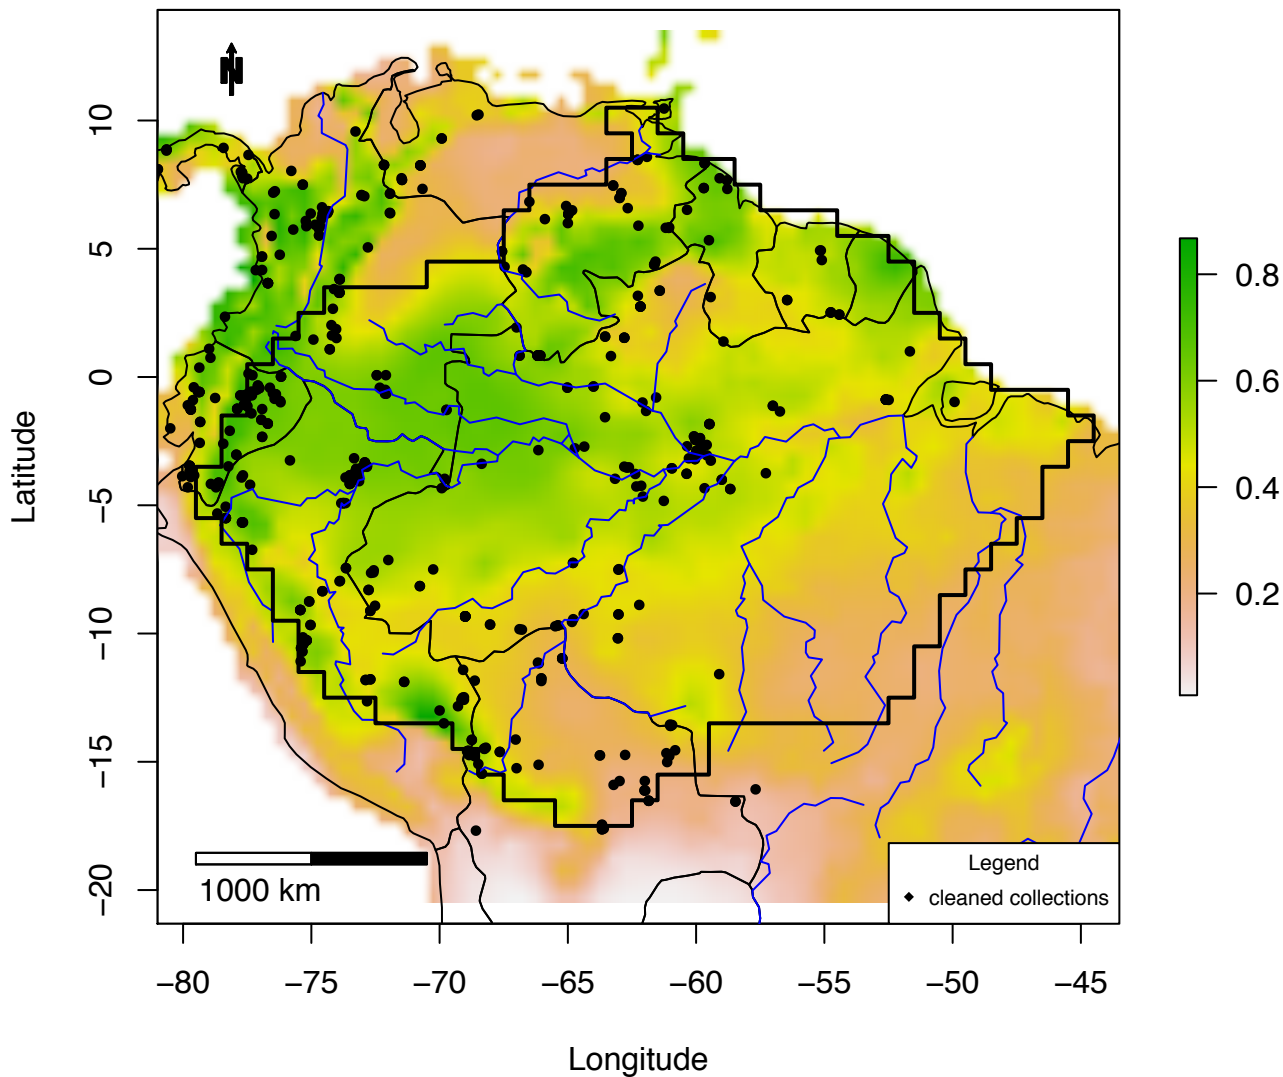



Figure S3\_112C IDW map of *Ocotea\_cernua*:  
plots =0 – 0.04; IDW: 0 – 0.03

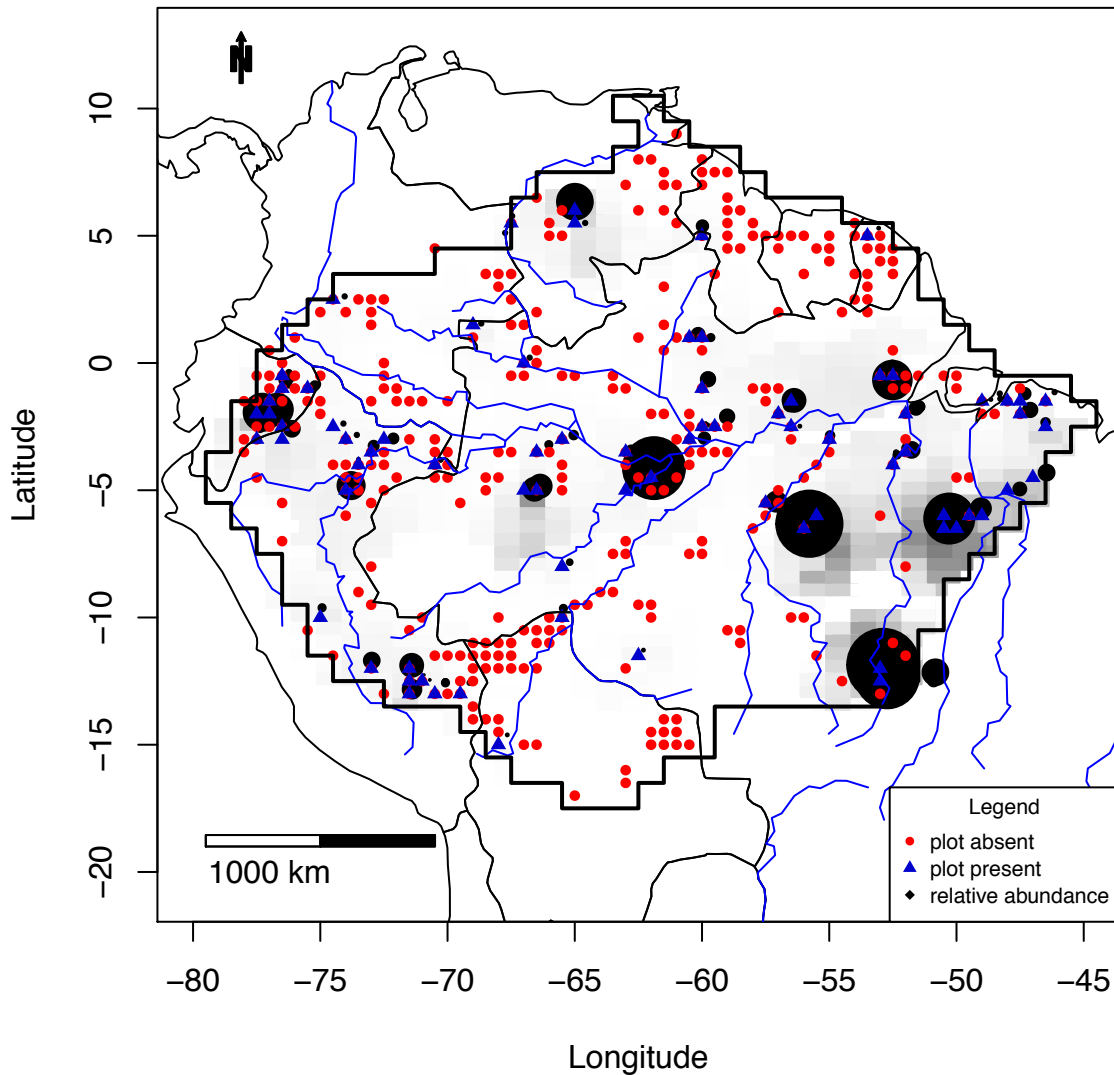

Figure S3\_113A Combined map of *Oenocarpus\_bacaba*

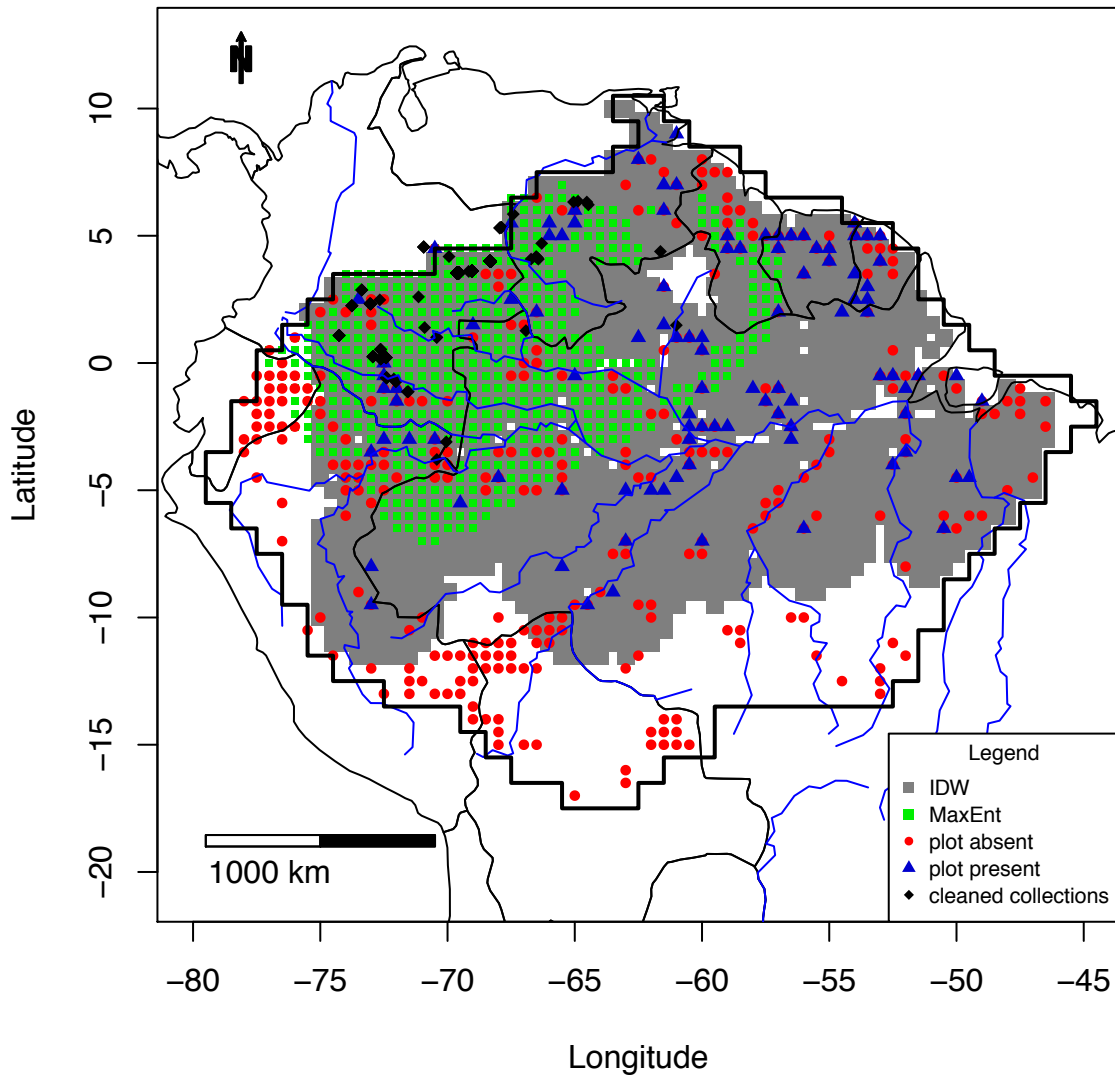

Figure S3\_113B MaxEnt map of *Oenocarpus bacaba*

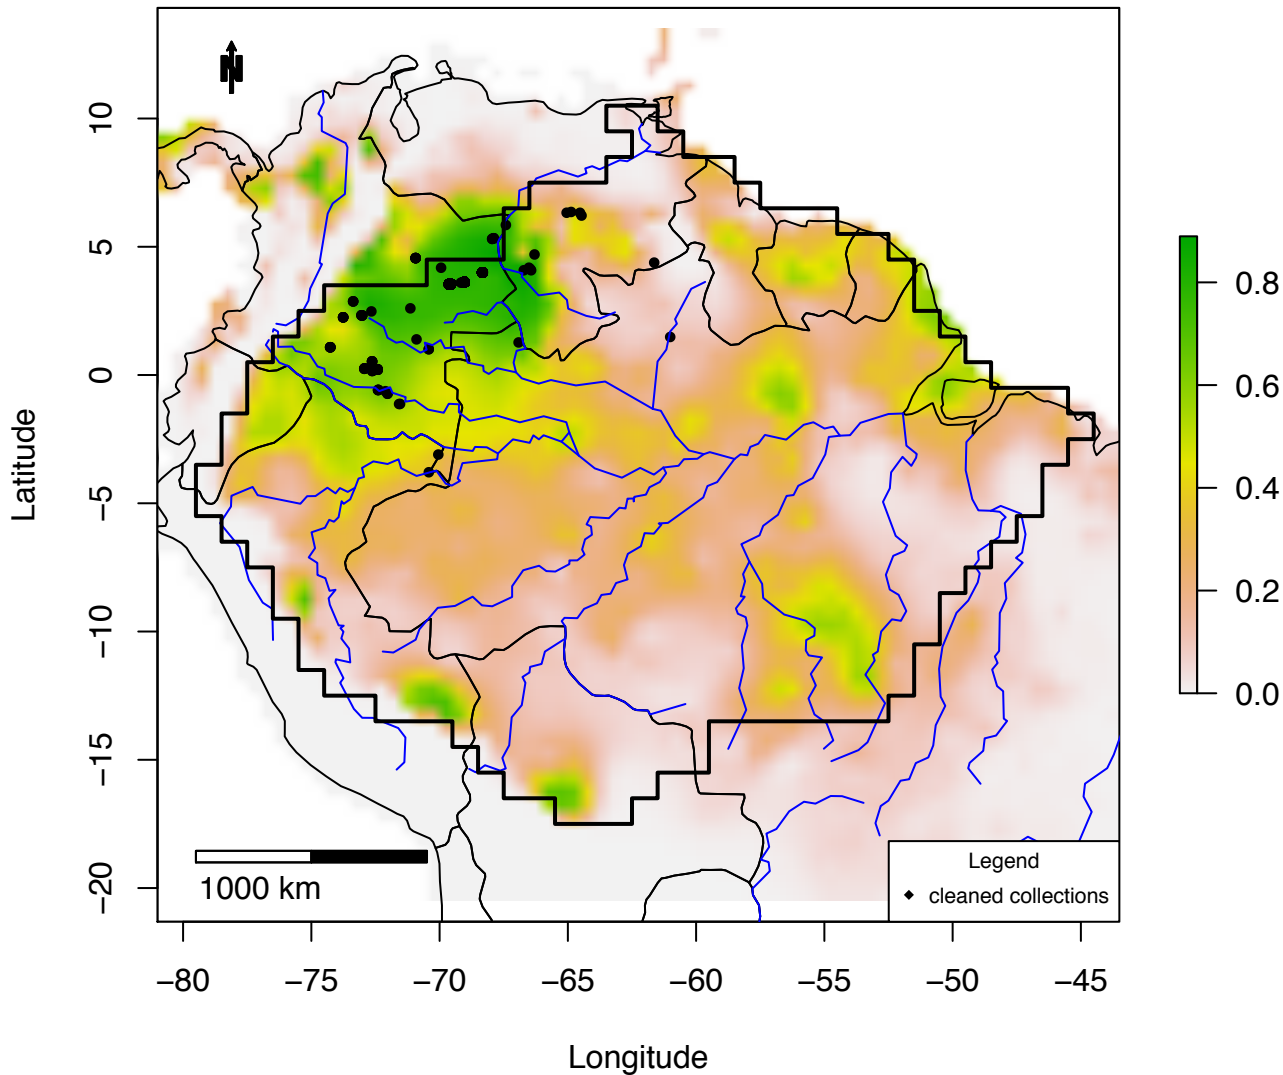

Figure S3\_113C IDW map of *Oenocarpus\_bacaba*:  
plots =0 – 0.16; IDW: 0 – 0.06

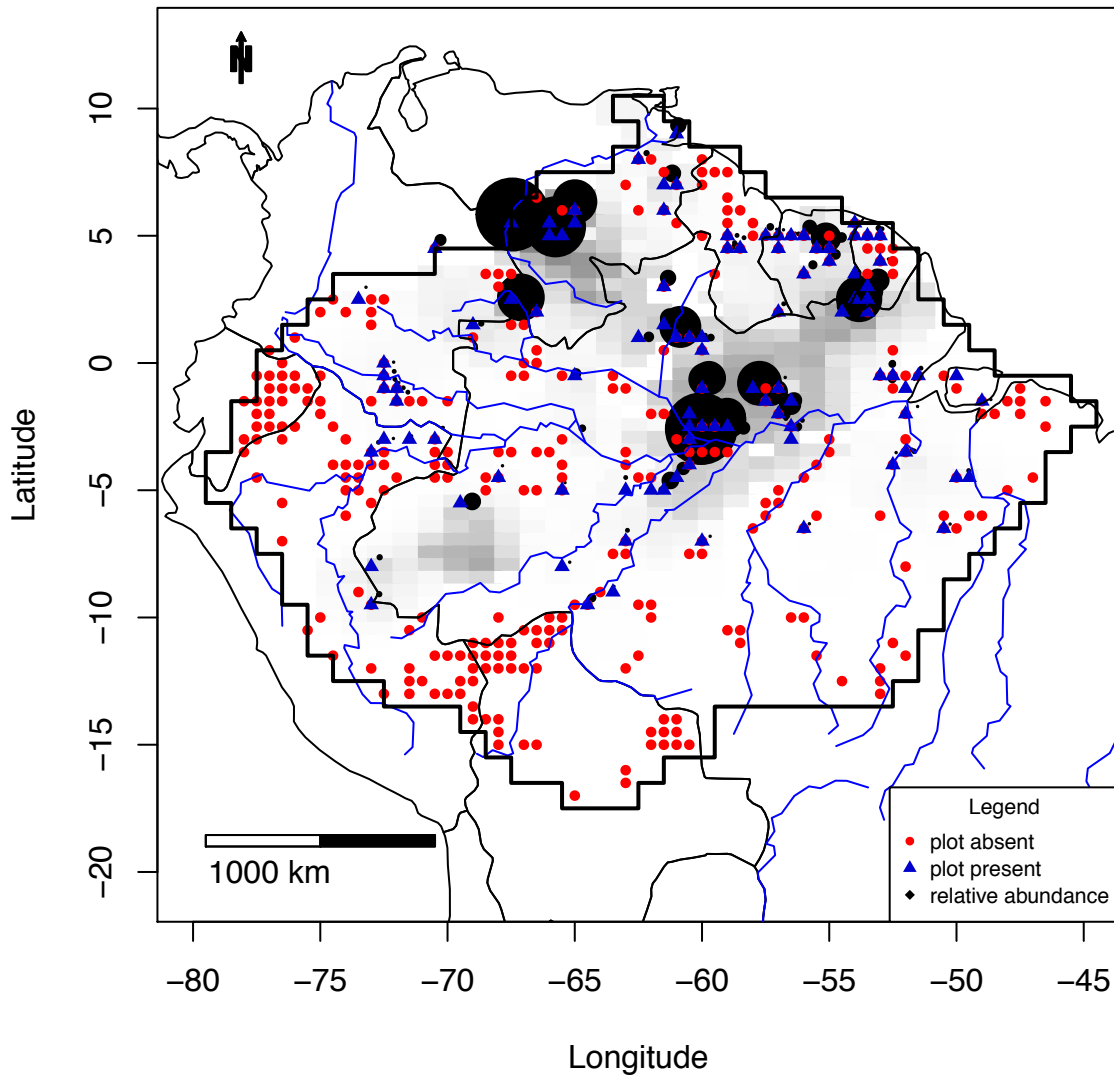

Figure S3\_114A Combined map of *Oenocarpus\_bataua*

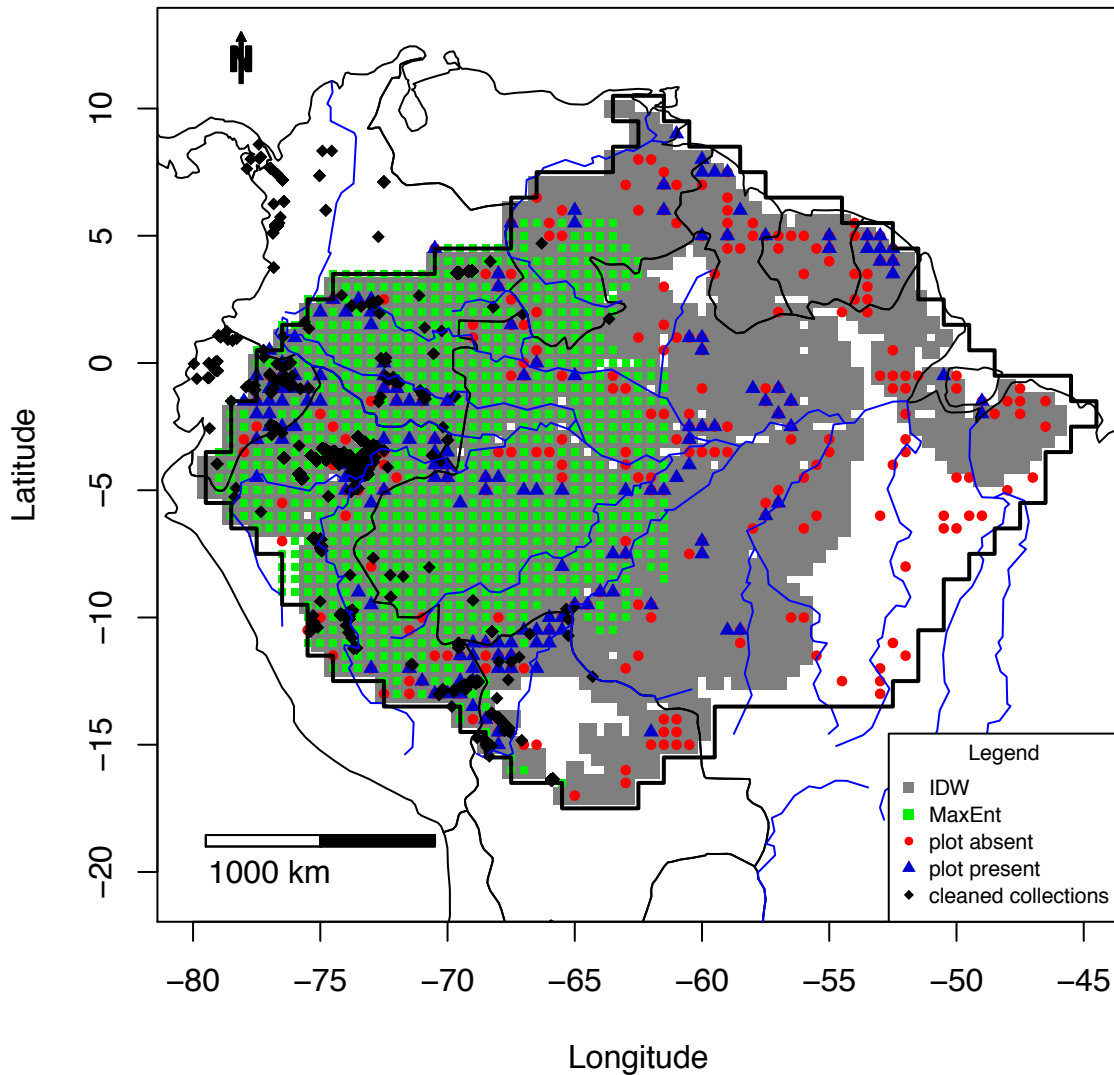

Figure S3\_114B MaxEnt map of *Oenocarpus\_bataua*

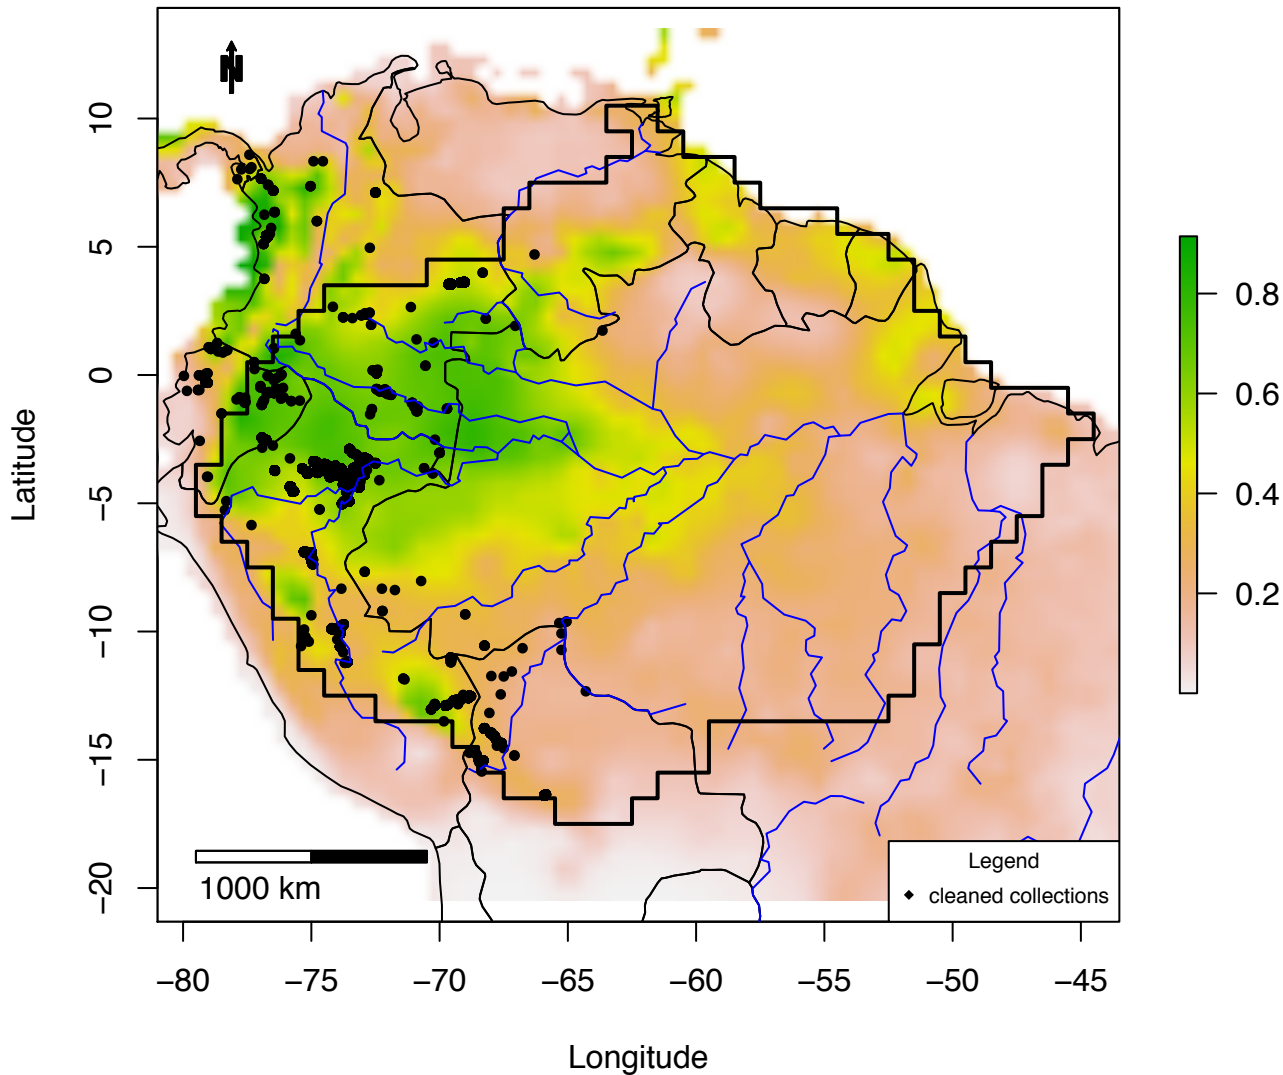

Figure S3\_114C IDW map of *Oenocarpus\_bataua*:  
plots =0 – 0.27; IDW: 0 – 0.22

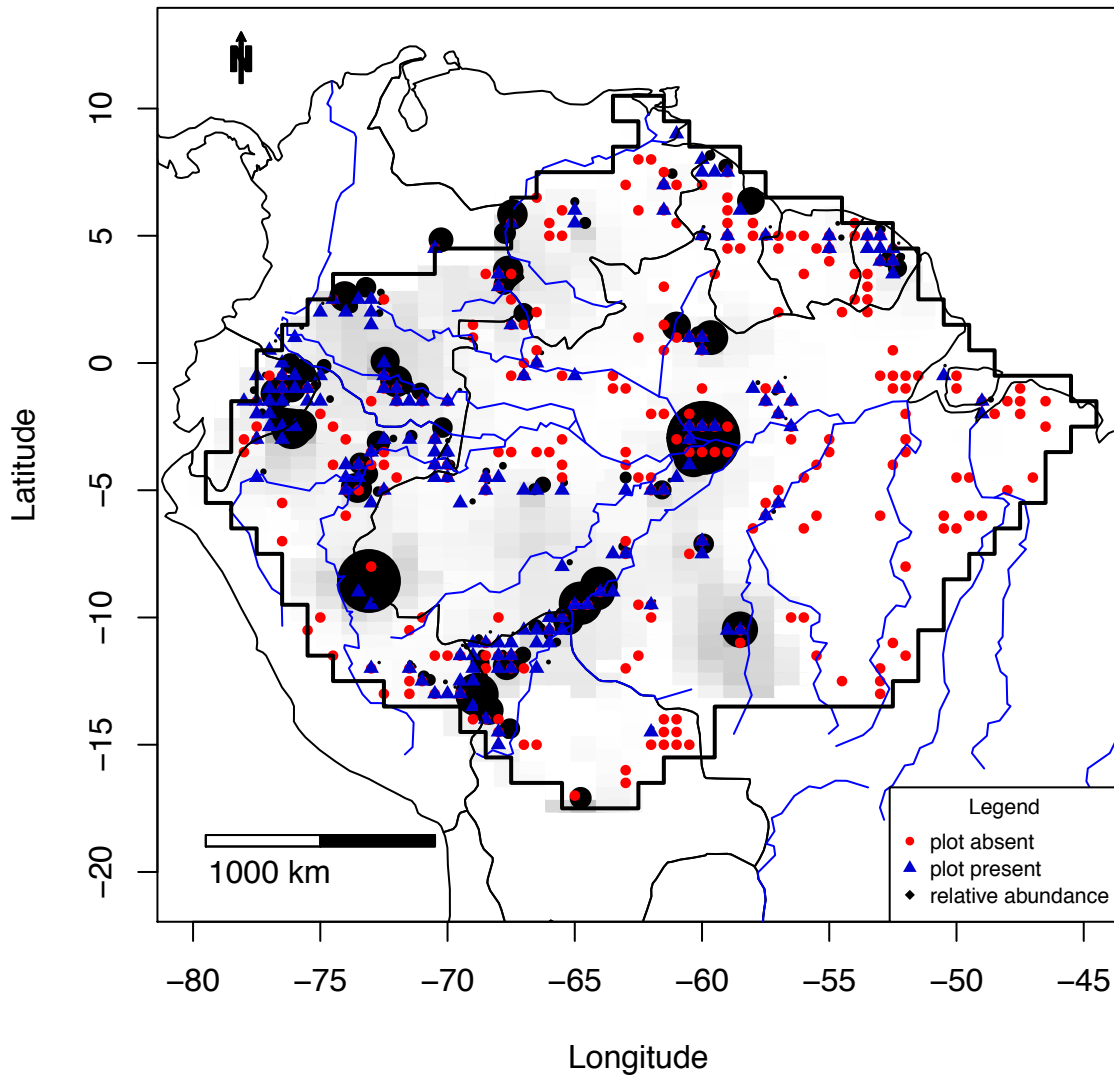

Figure S3\_115A Combined map of *Osteophloeum\_platyspermum*

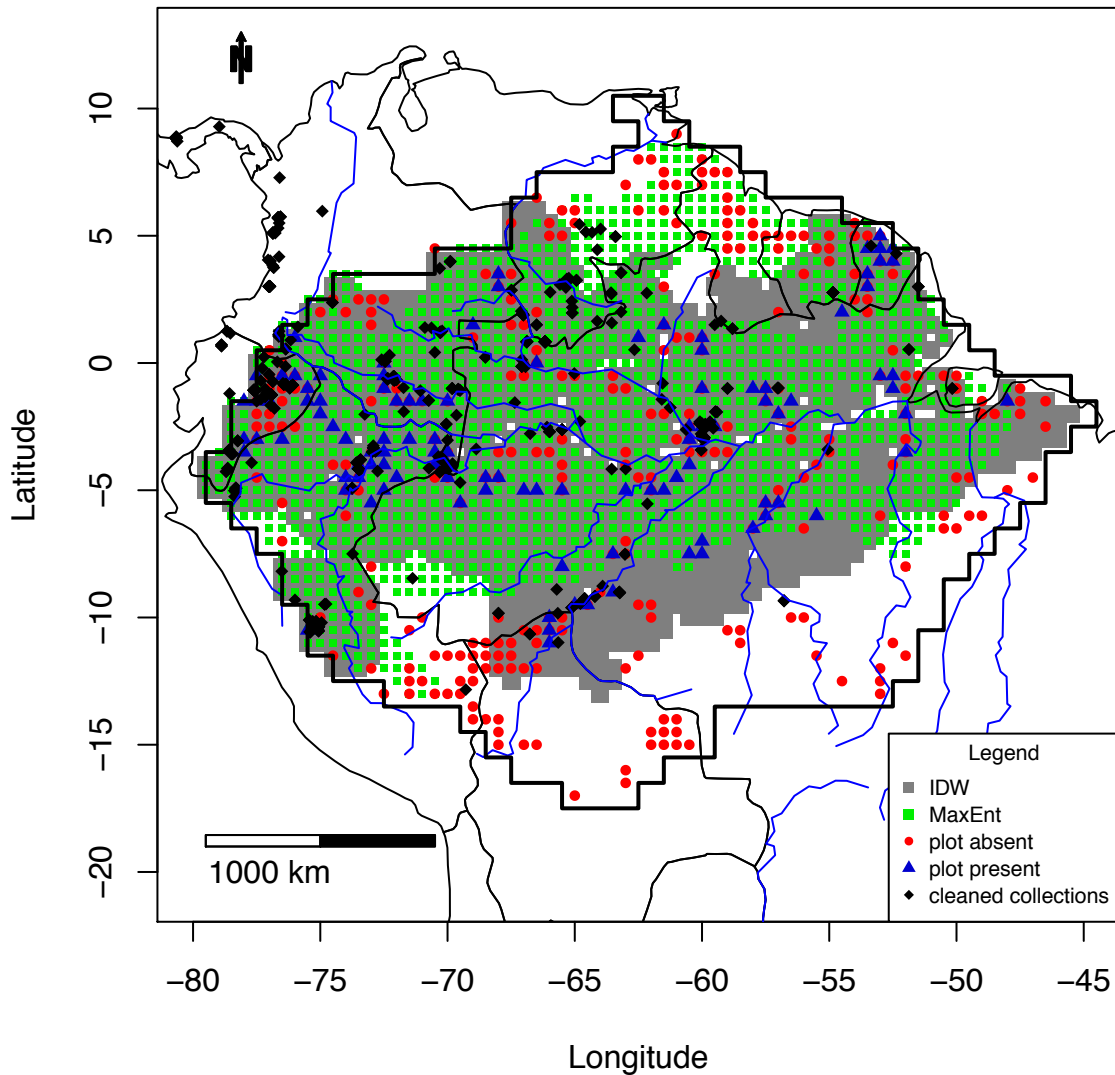



Figure S3\_115B MaxEnt map of *Osteophloeum\_platyspermum*

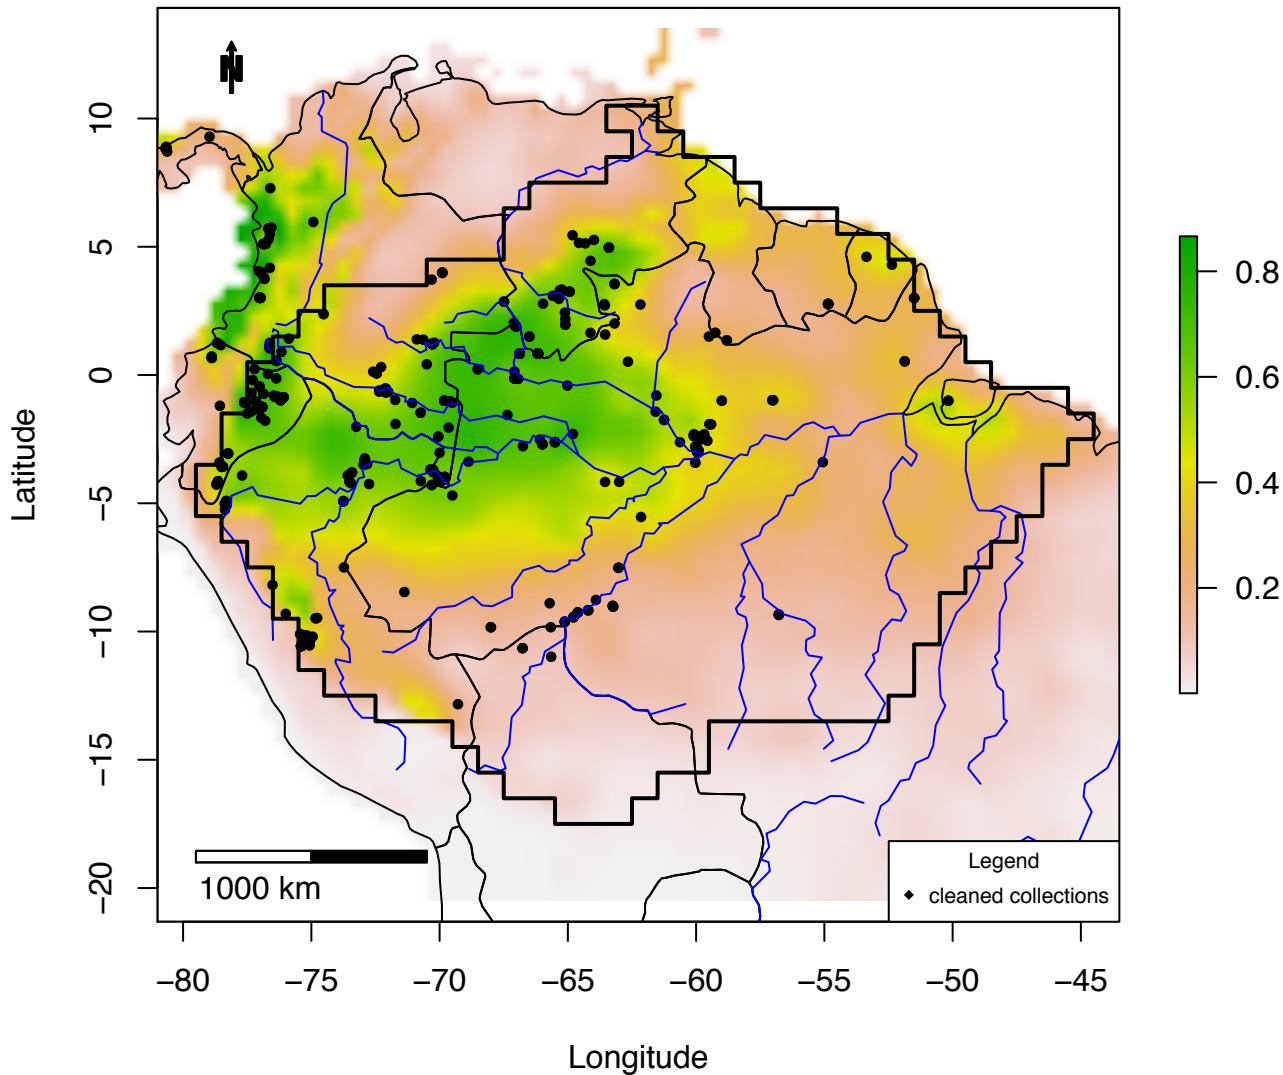

Figure S3\_115C IDW map of *Osteophloeum\_platyspermum*:  
plots =0 – 0.08; IDW: 0 – 0.03

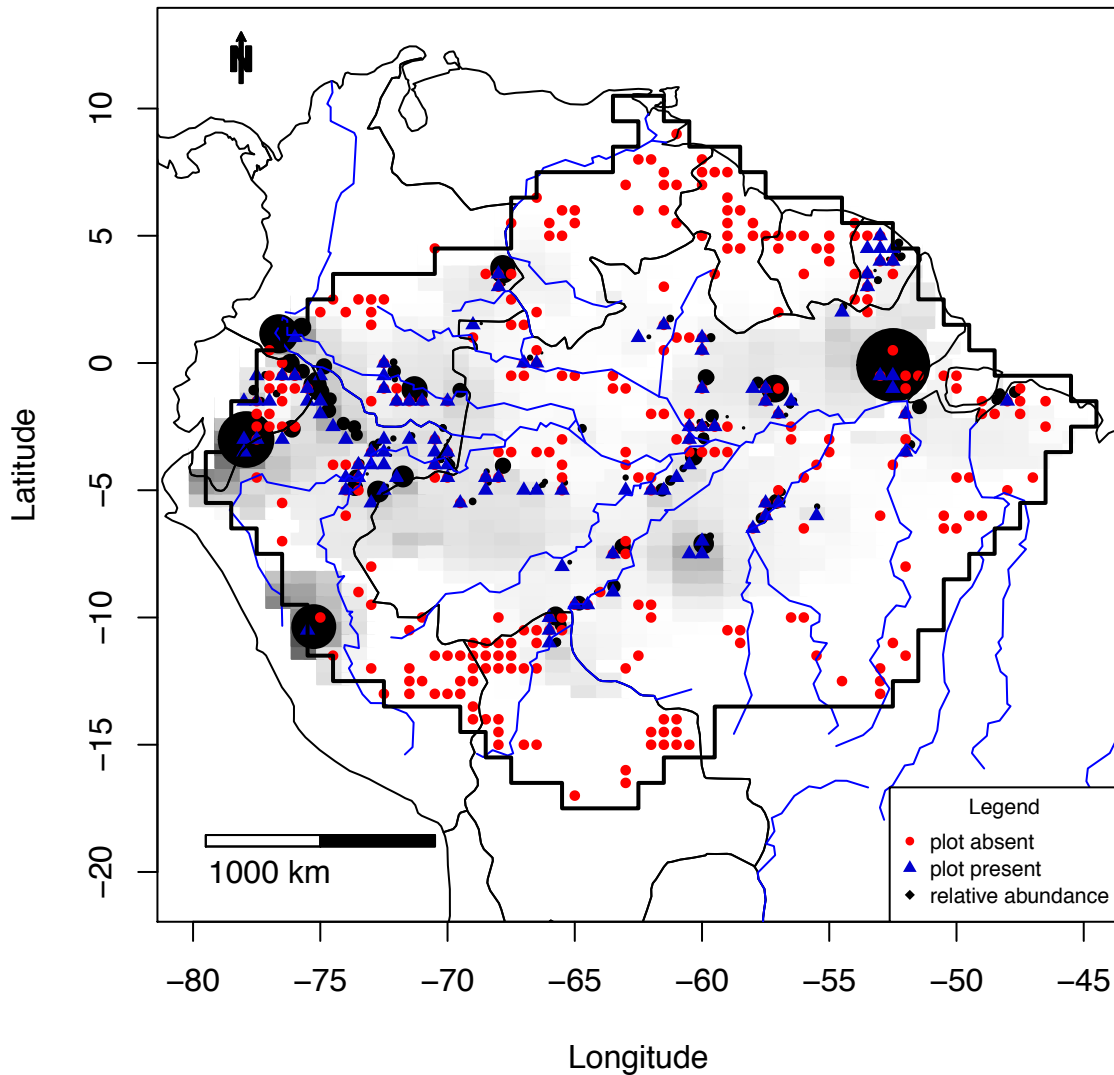

Figure S3\_116A Combined map of *Otoba\_parvifolia*

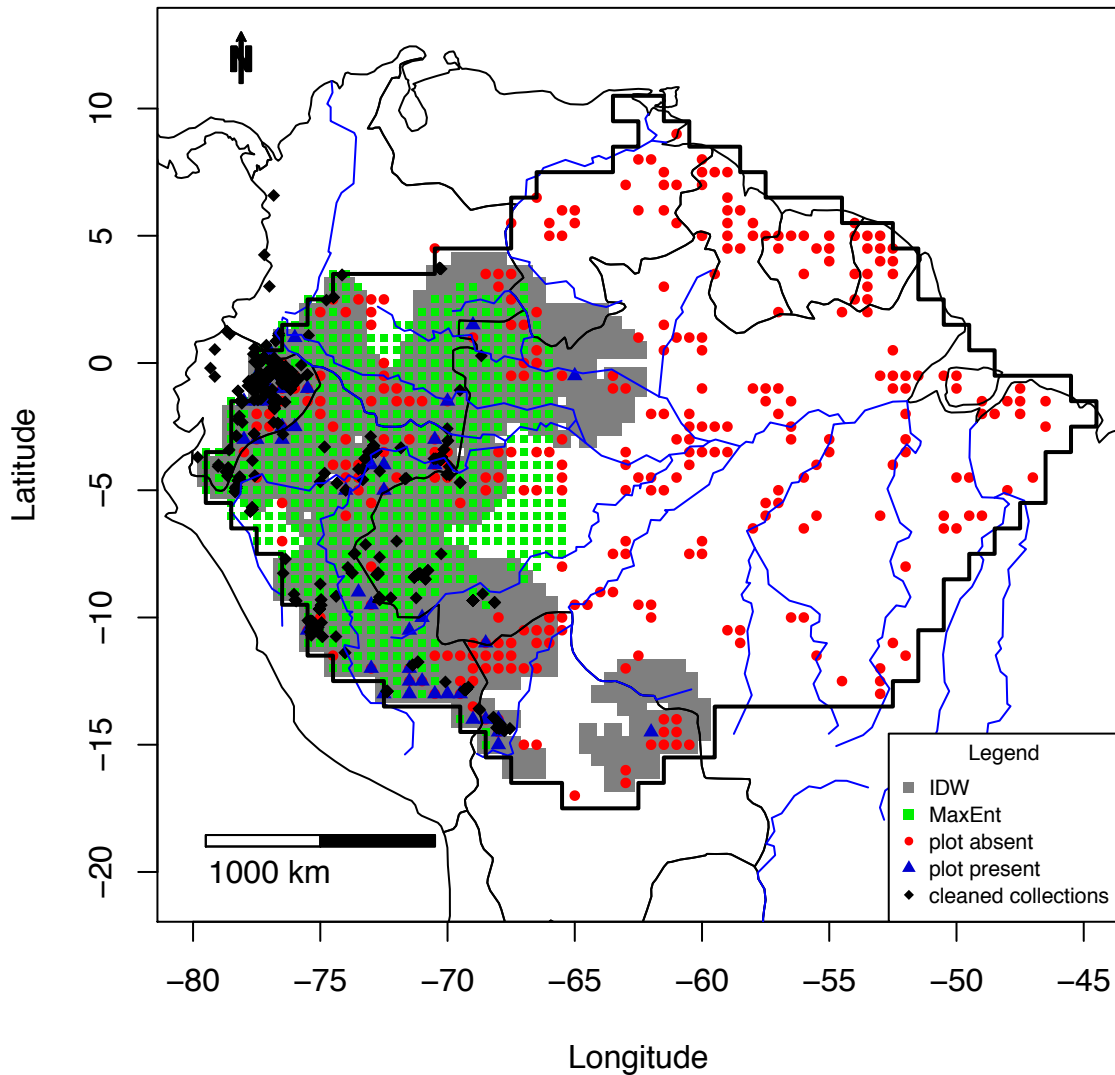

Figure S3\_116B MaxEnt map of *Otoba\_parvifolia*

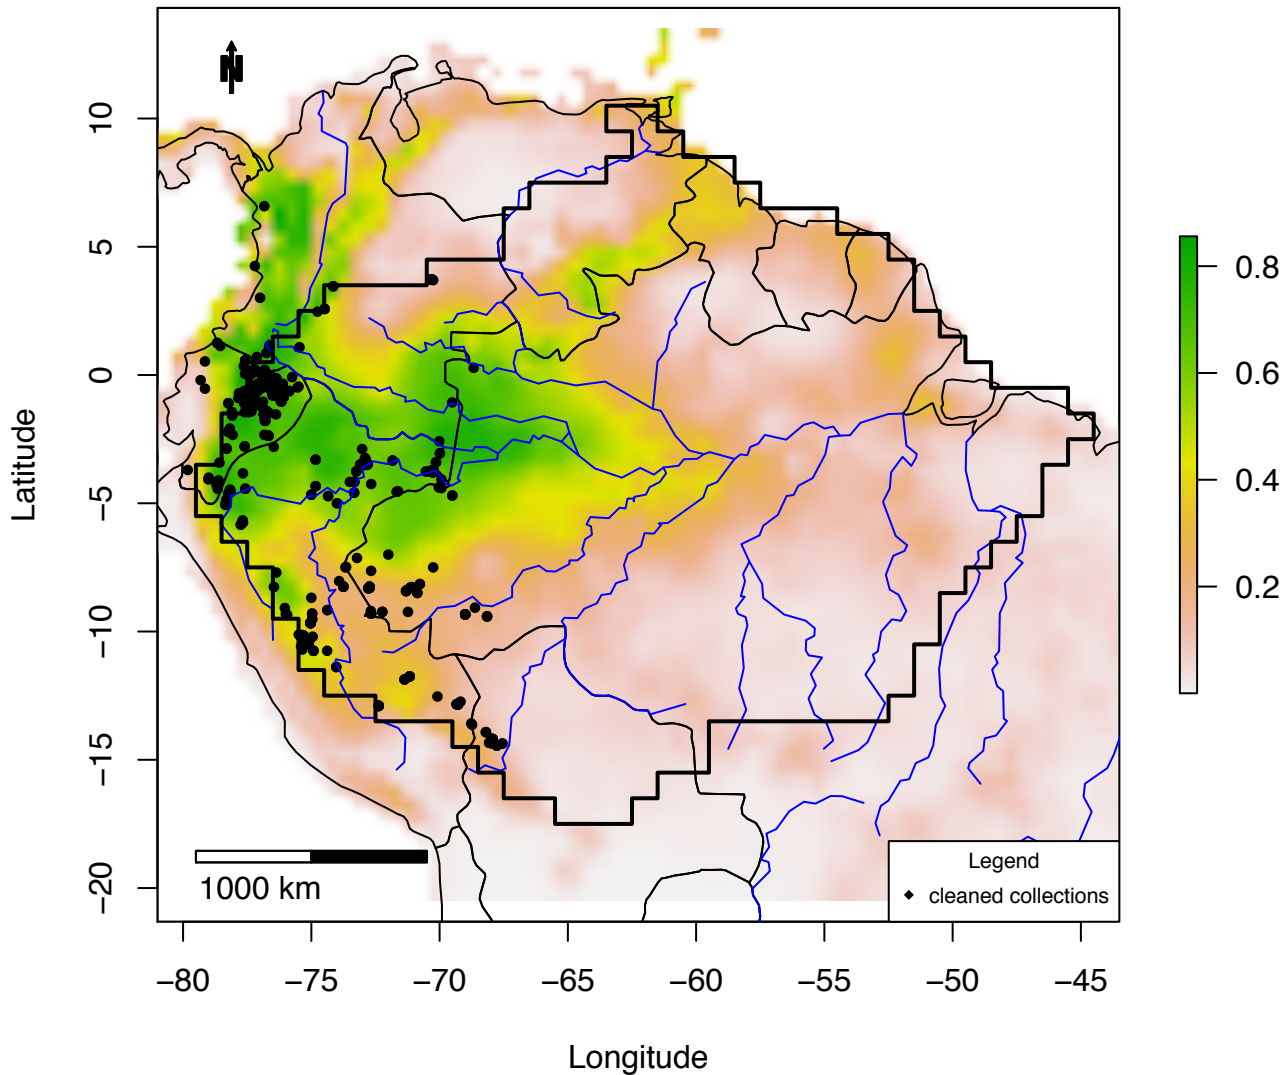

Figure S3\_116C IDW map of *Otoba parvifolia*:  
plots =0 – 0.15; IDW: 0 – 0.05

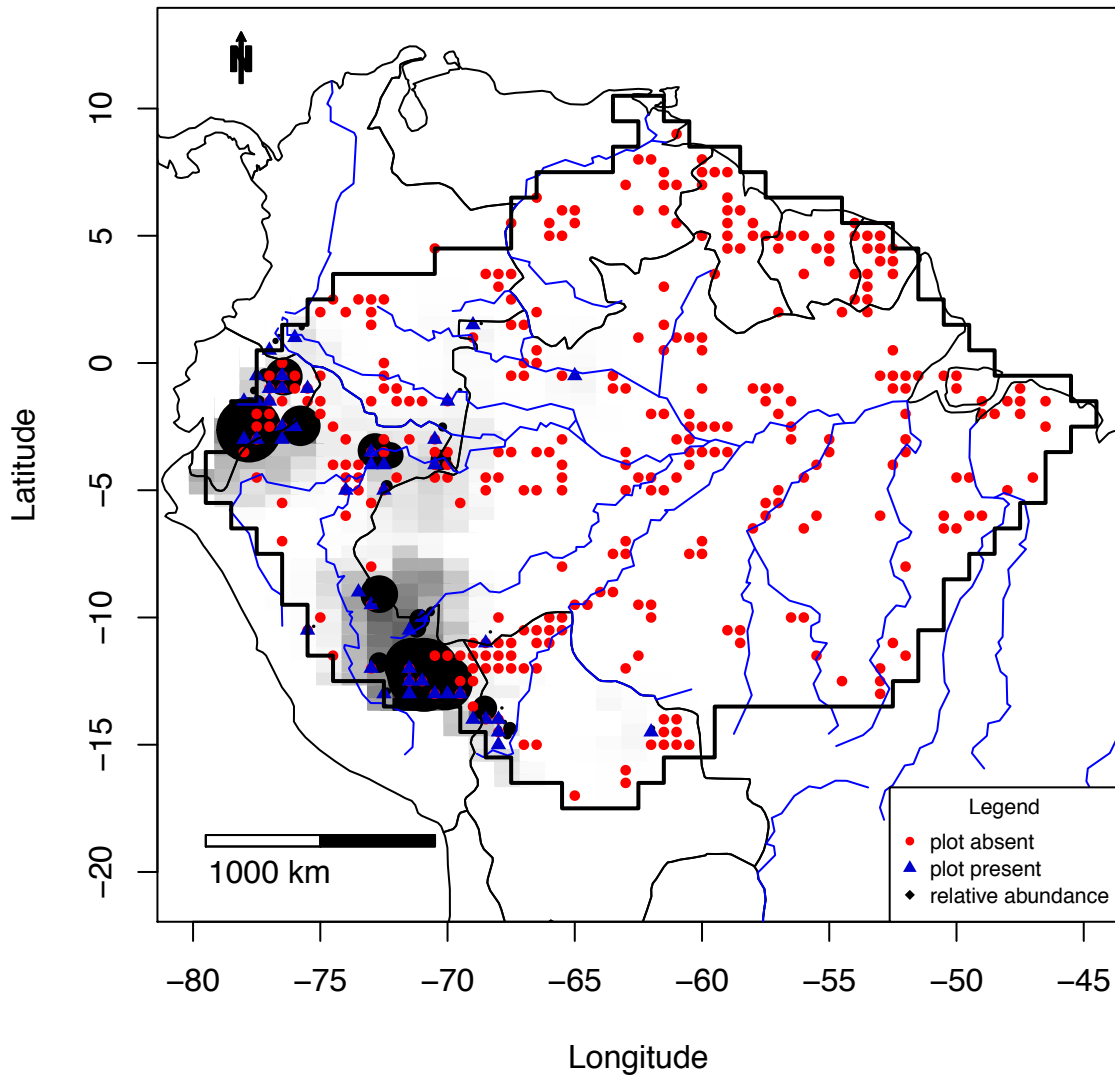

Figure S3\_117A Combined map of *Oxandra\_polyantha*

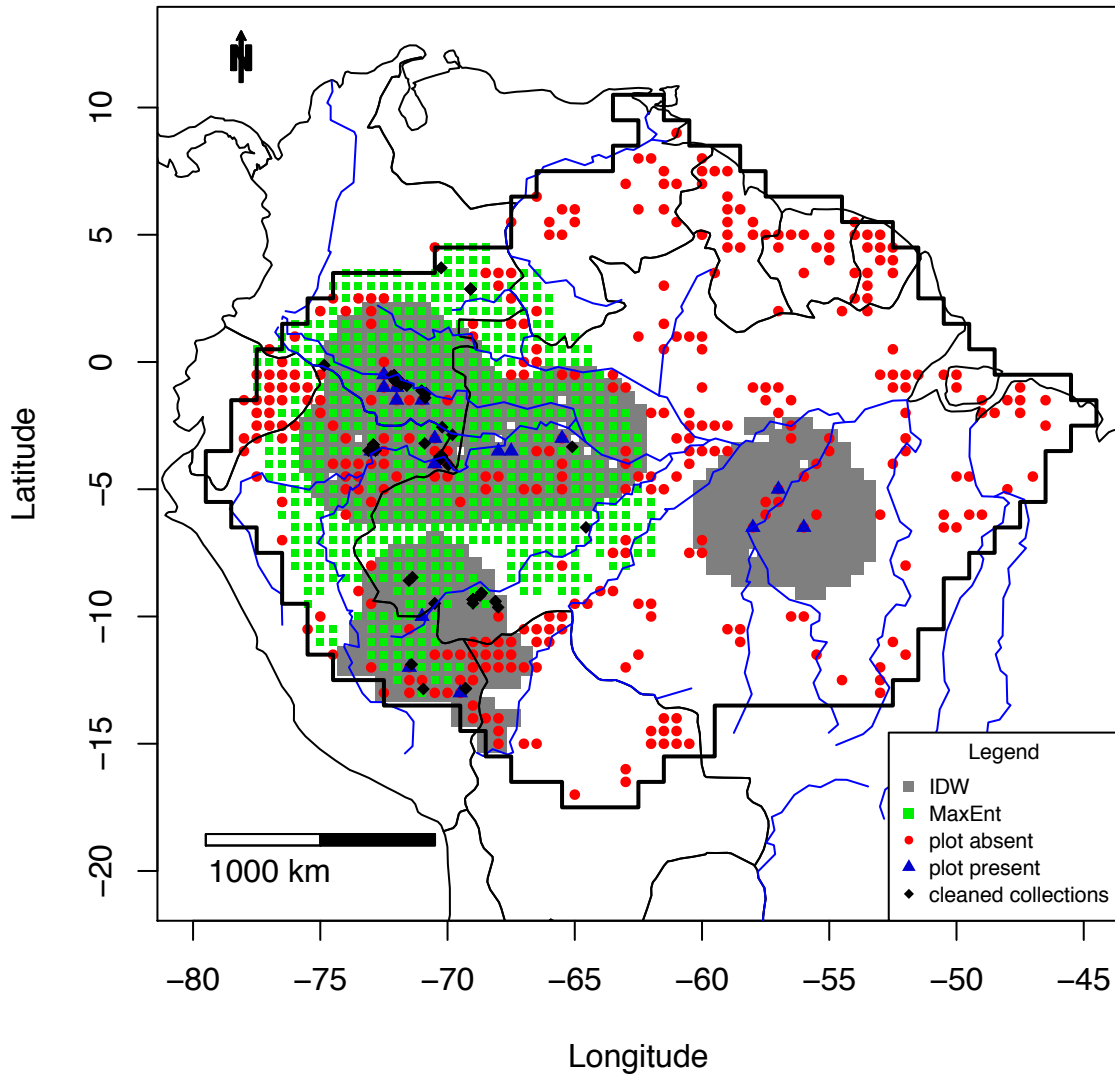

Figure S3\_117B MaxEnt map of *Oxandra\_polyantha*

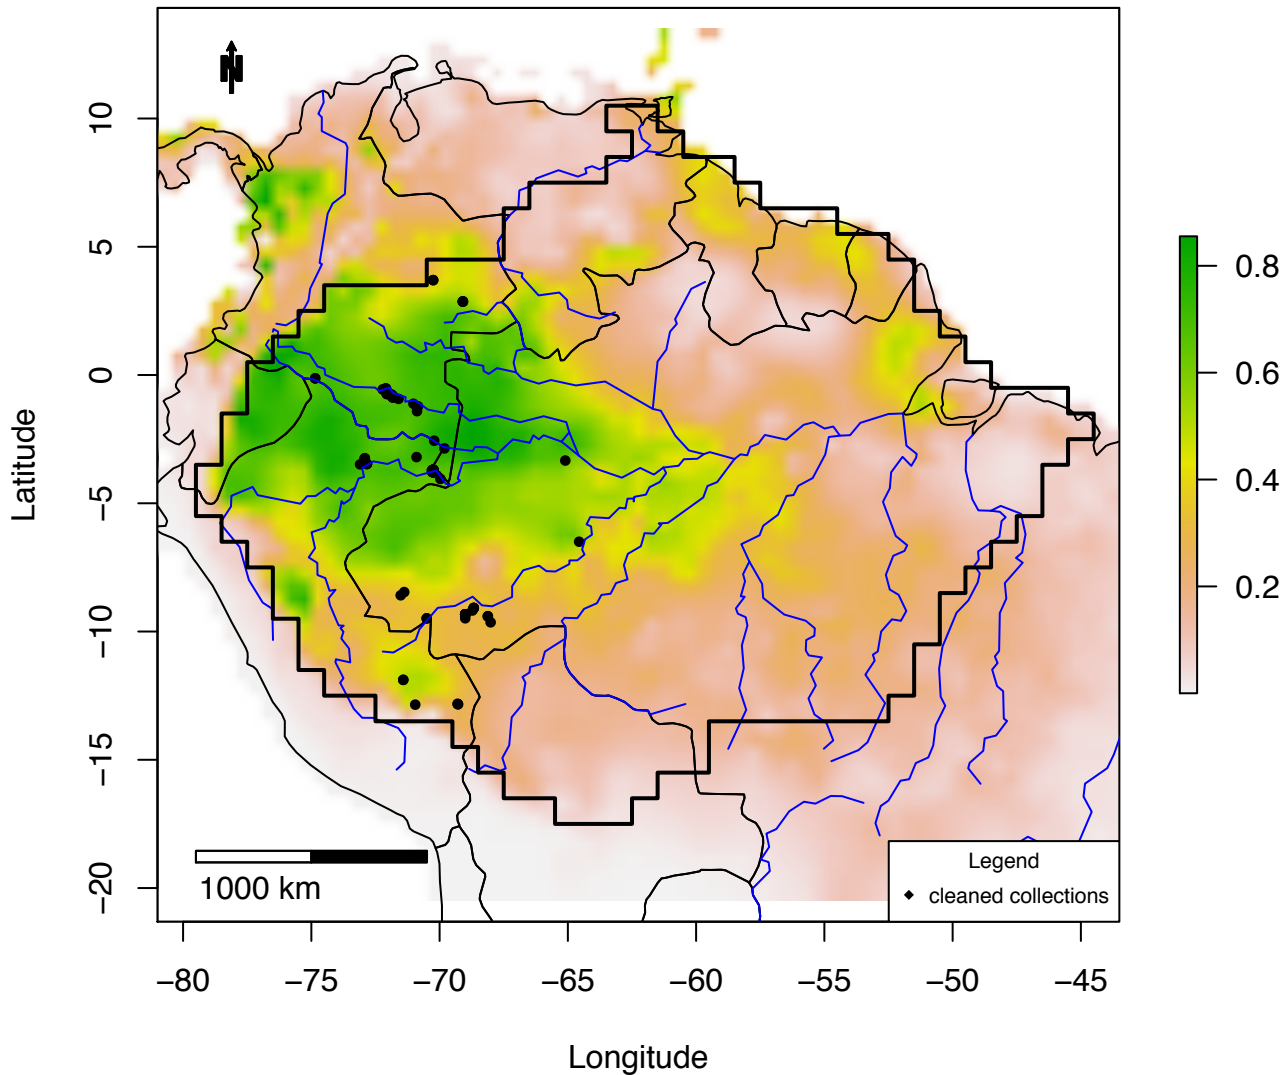

Figure S3\_117C IDW map of *Oxandra polyantha*:  
plots = 0 – 0.59; IDW: 0 – 0.08

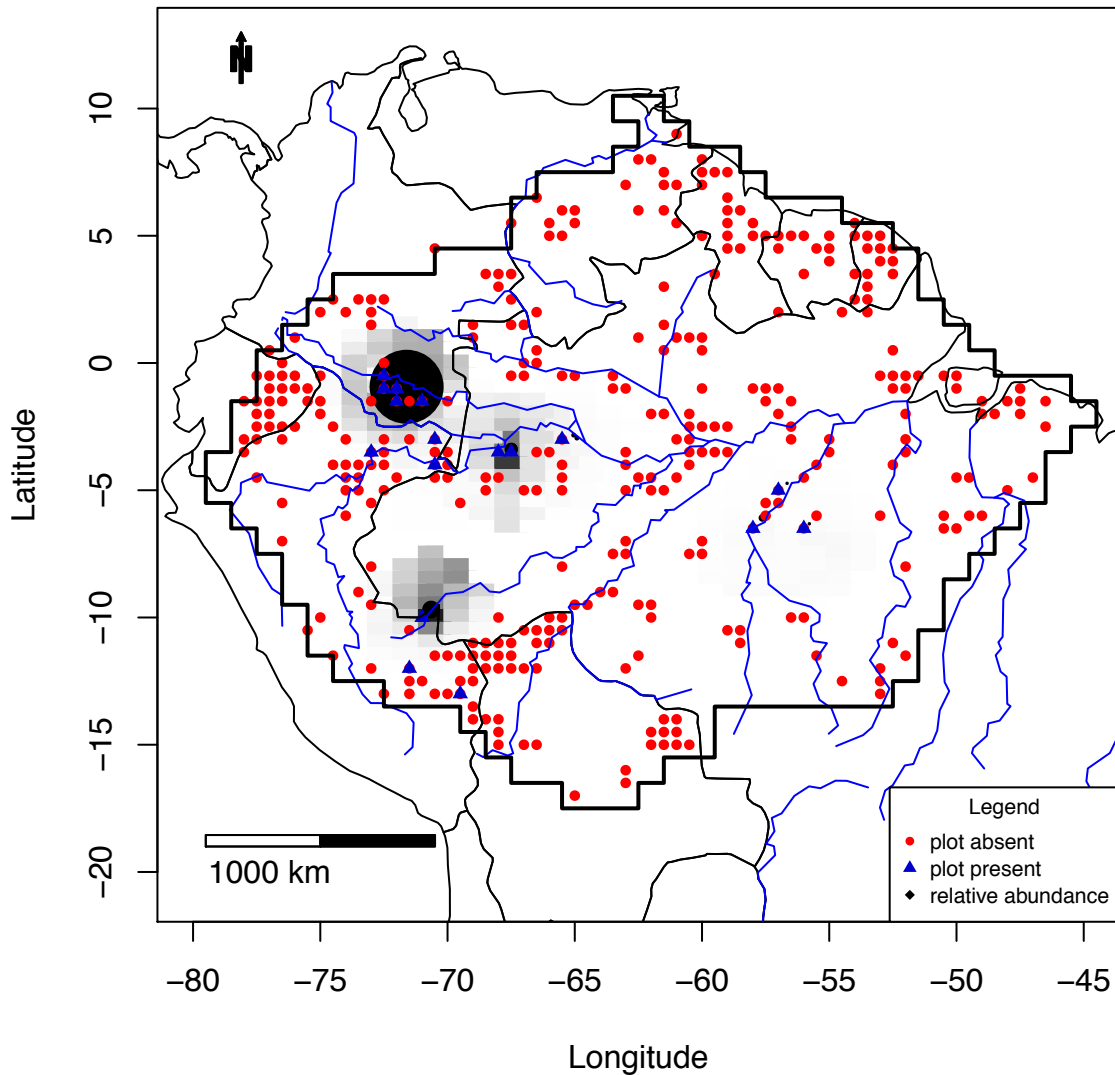



Figure S3\_118A Combined map of *Pachira\_brevipes*

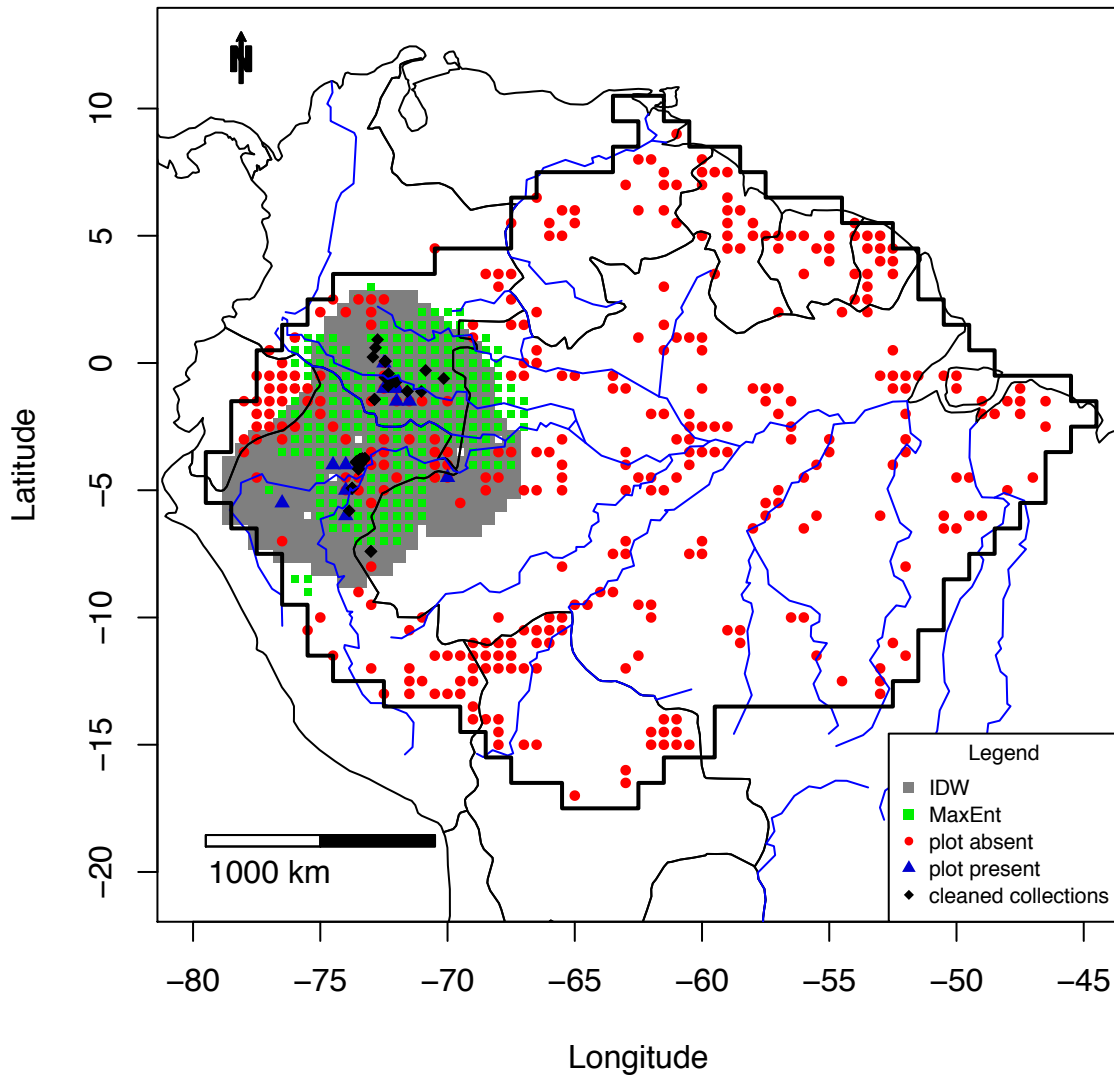

Figure S3\_118B MaxEnt map of *Pachira brevipes*

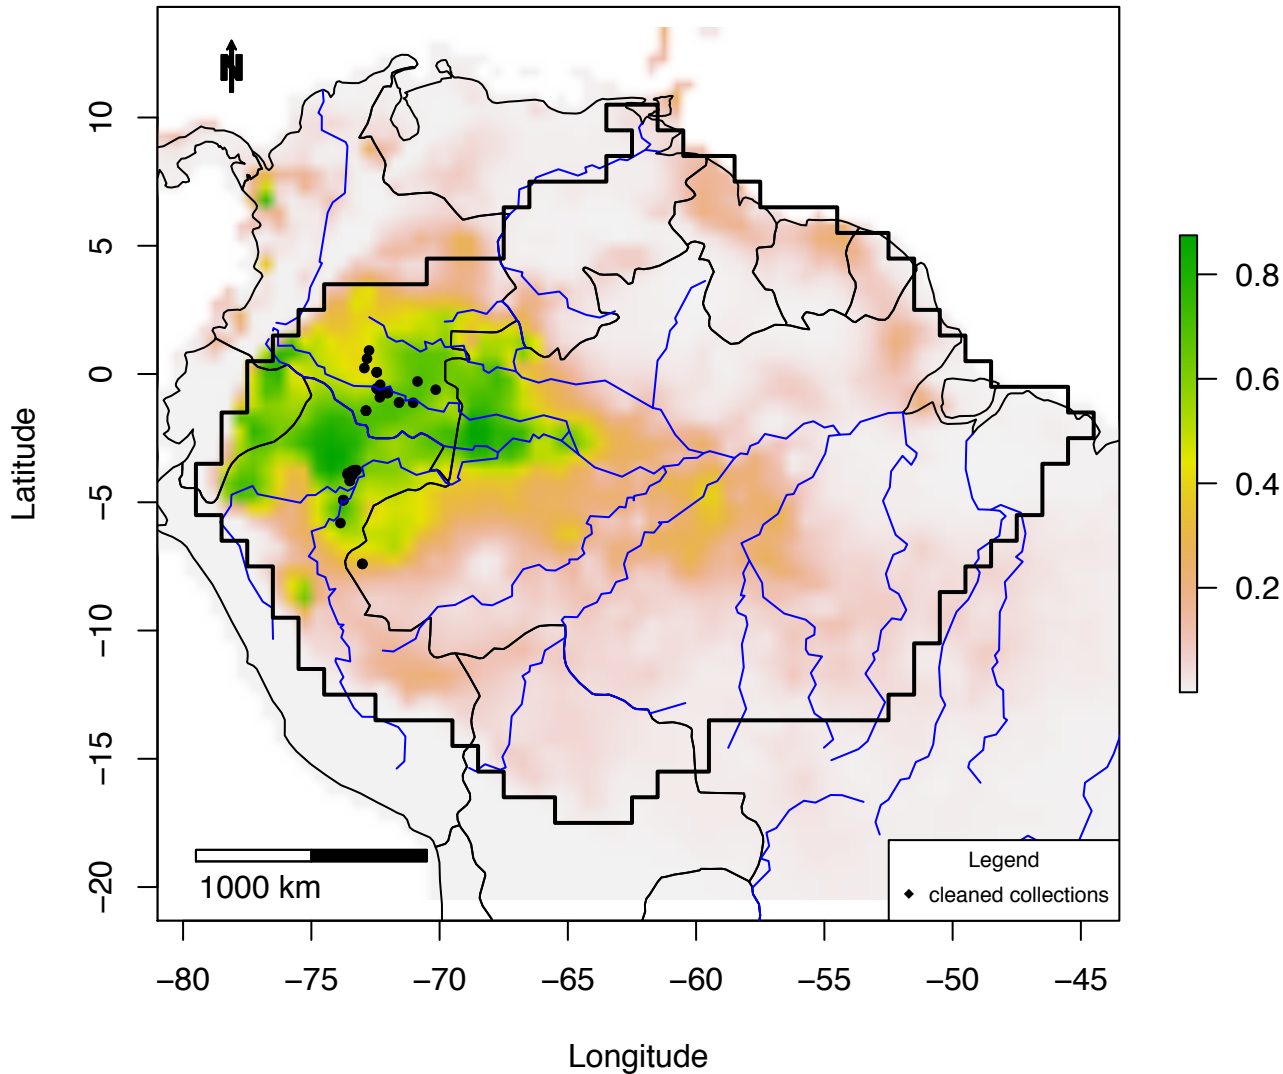

**Figure S3\_118C IDW map of *Pachira brevipes*:**  
**plots =0 – 0.57; IDW: 0 – 0.17**

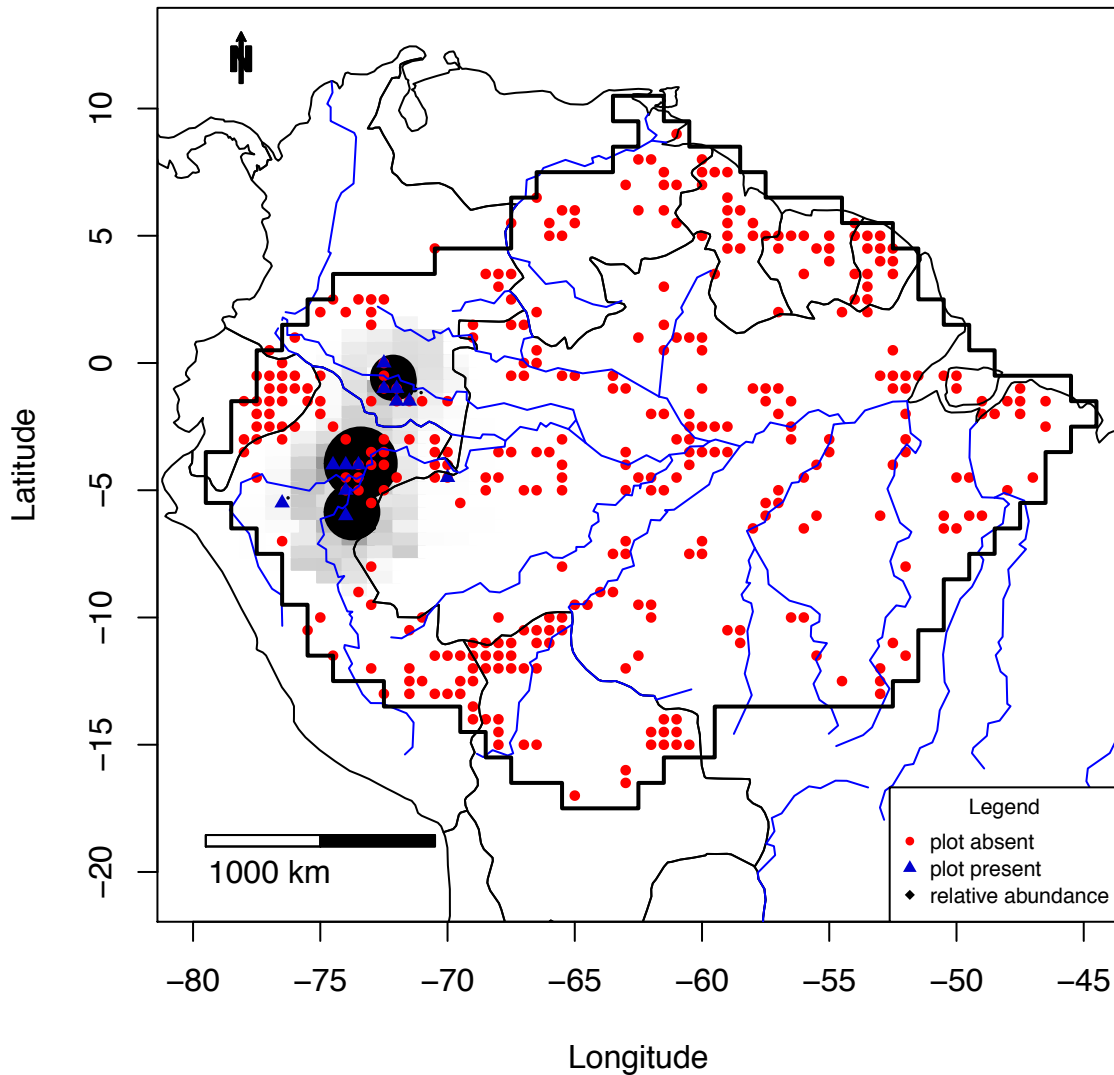

Figure S3\_119A Combined map of *Pentaclethra\_macroloba*

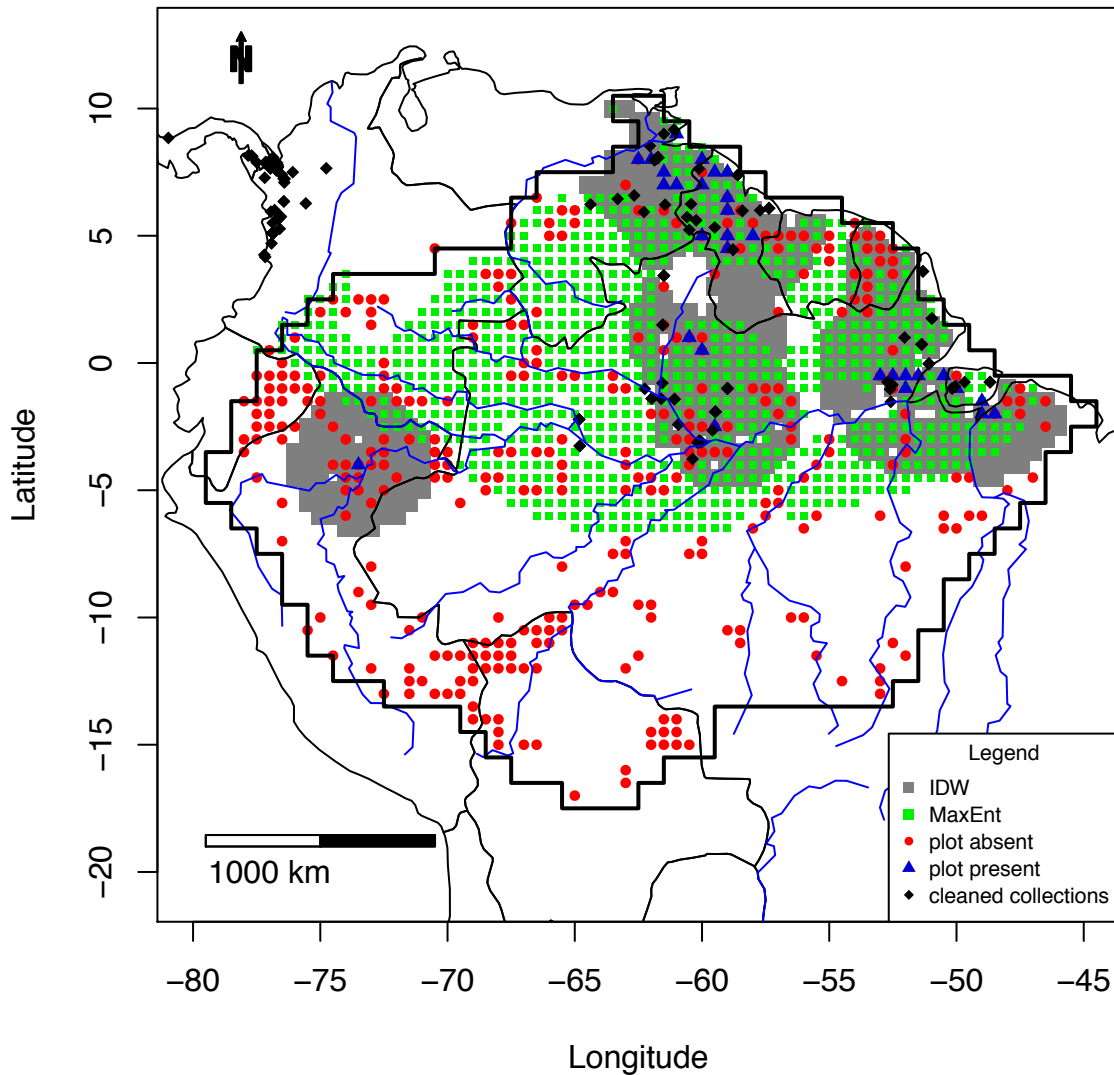

Figure S3\_119B MaxEnt map of *Pentaclethra\_macroloba*

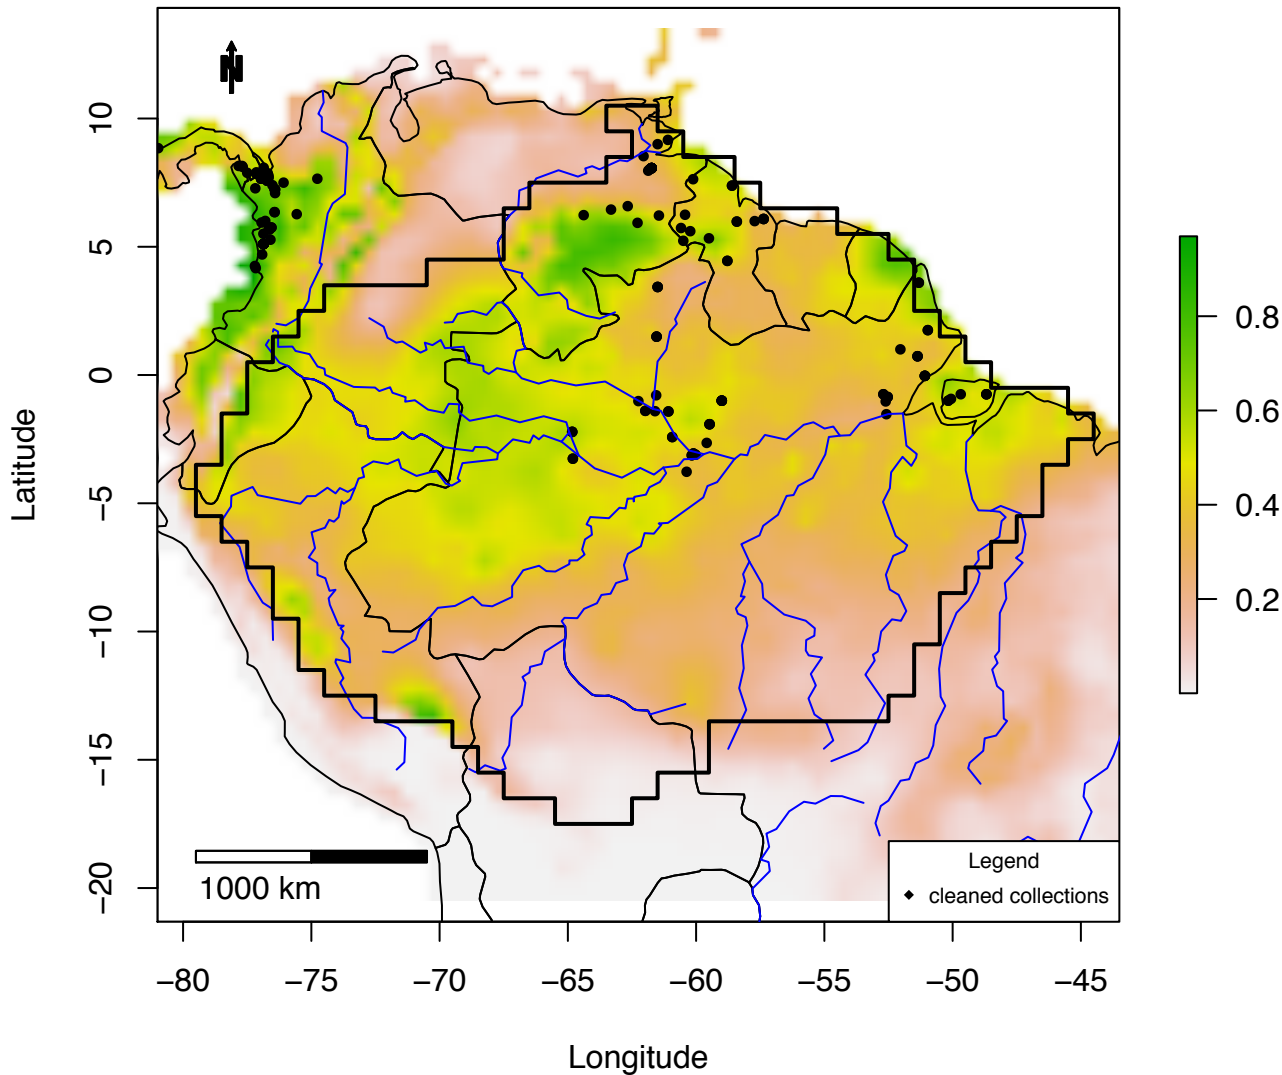

**Figure S3\_119C IDW map of *Pentaclethra macroloba*:  
plots =0 – 0.64; IDW: 0 – 0.24**

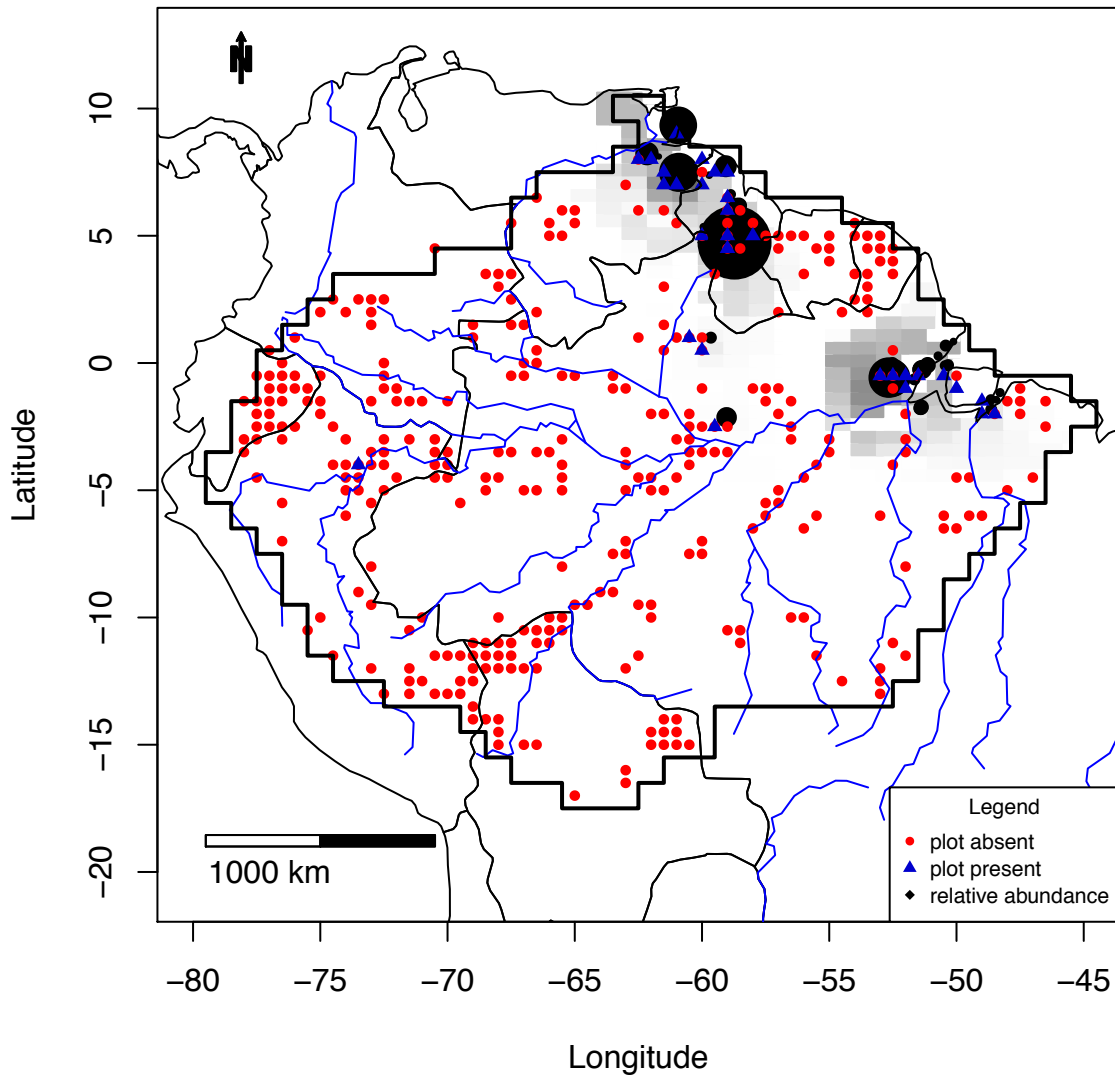

Figure S3\_120A Combined map of *Poulsenia\_armata*

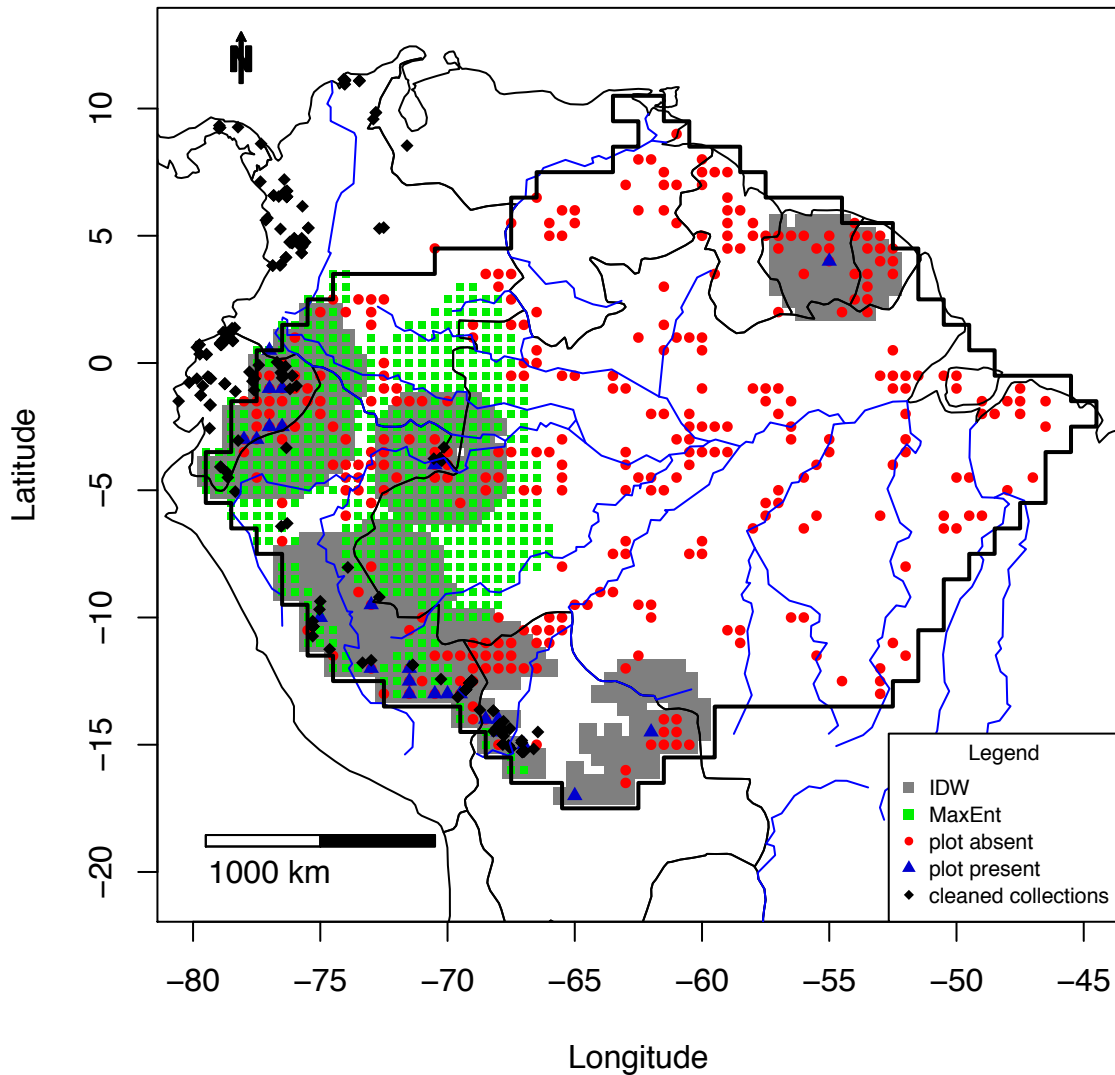

Figure S3\_120B MaxEnt map of *Poulsenia\_armata*

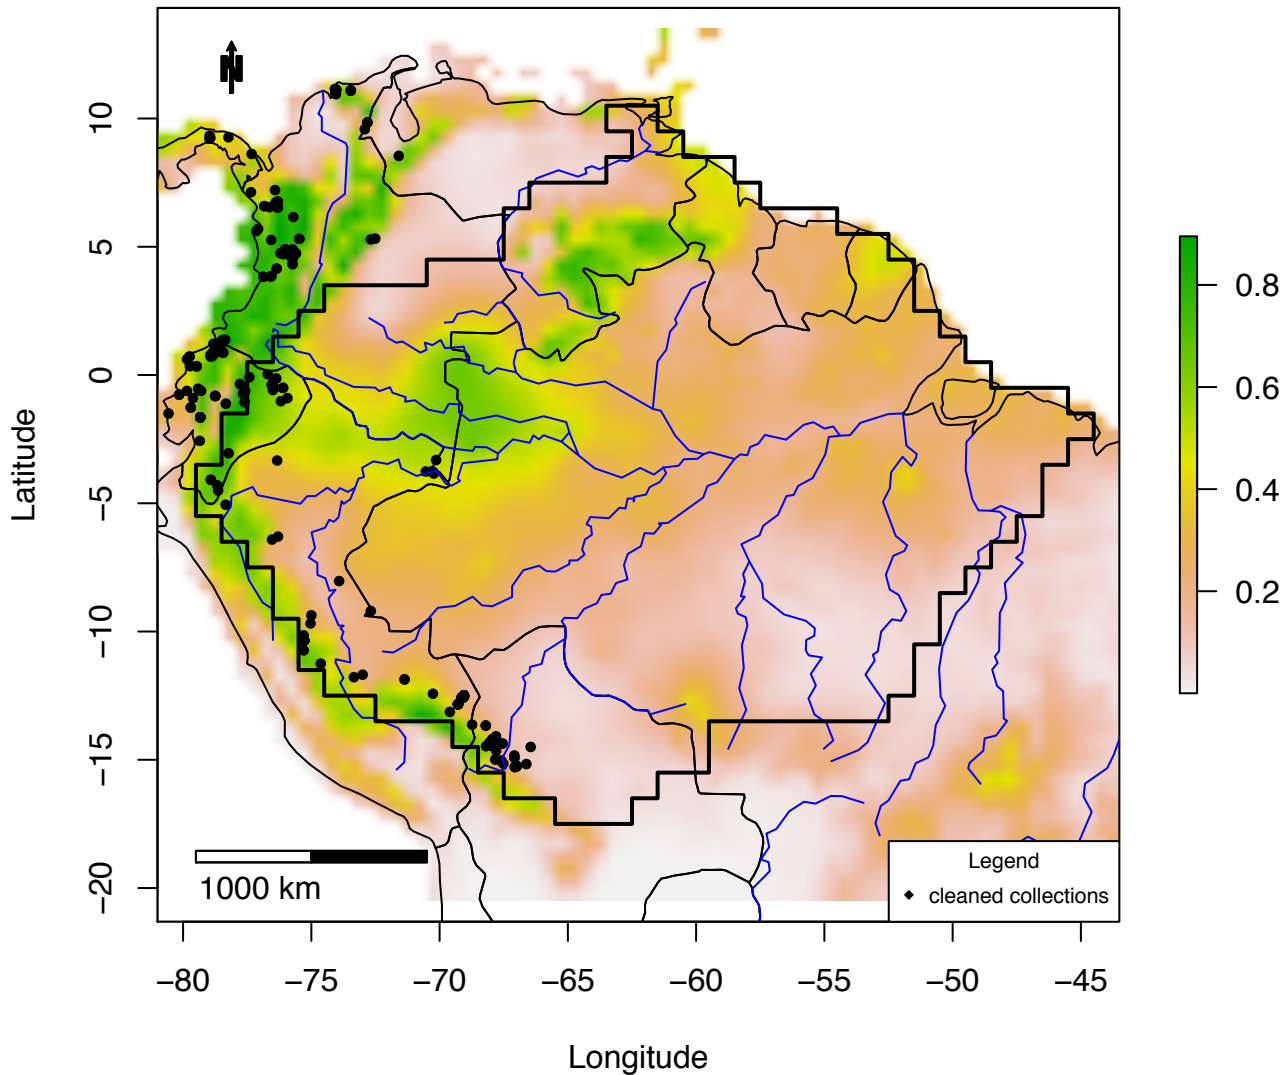



**Figure S3\_120C IDW map of *Poulsenia\_armata*:**  
plots =0 – 0.22; IDW: 0 – 0.17

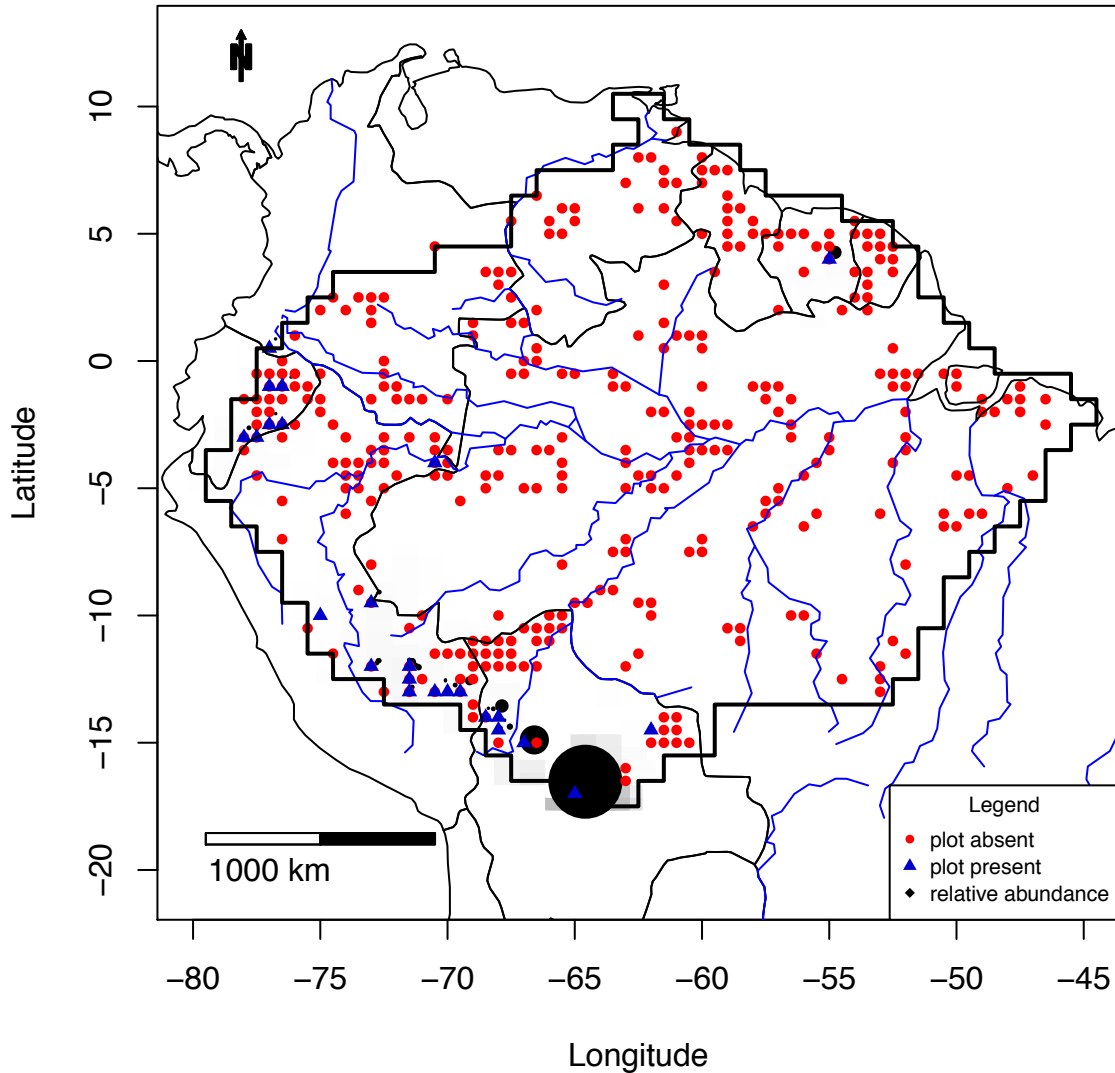

Figure S3\_121A Combined map of *Pourouma\_bicolor*

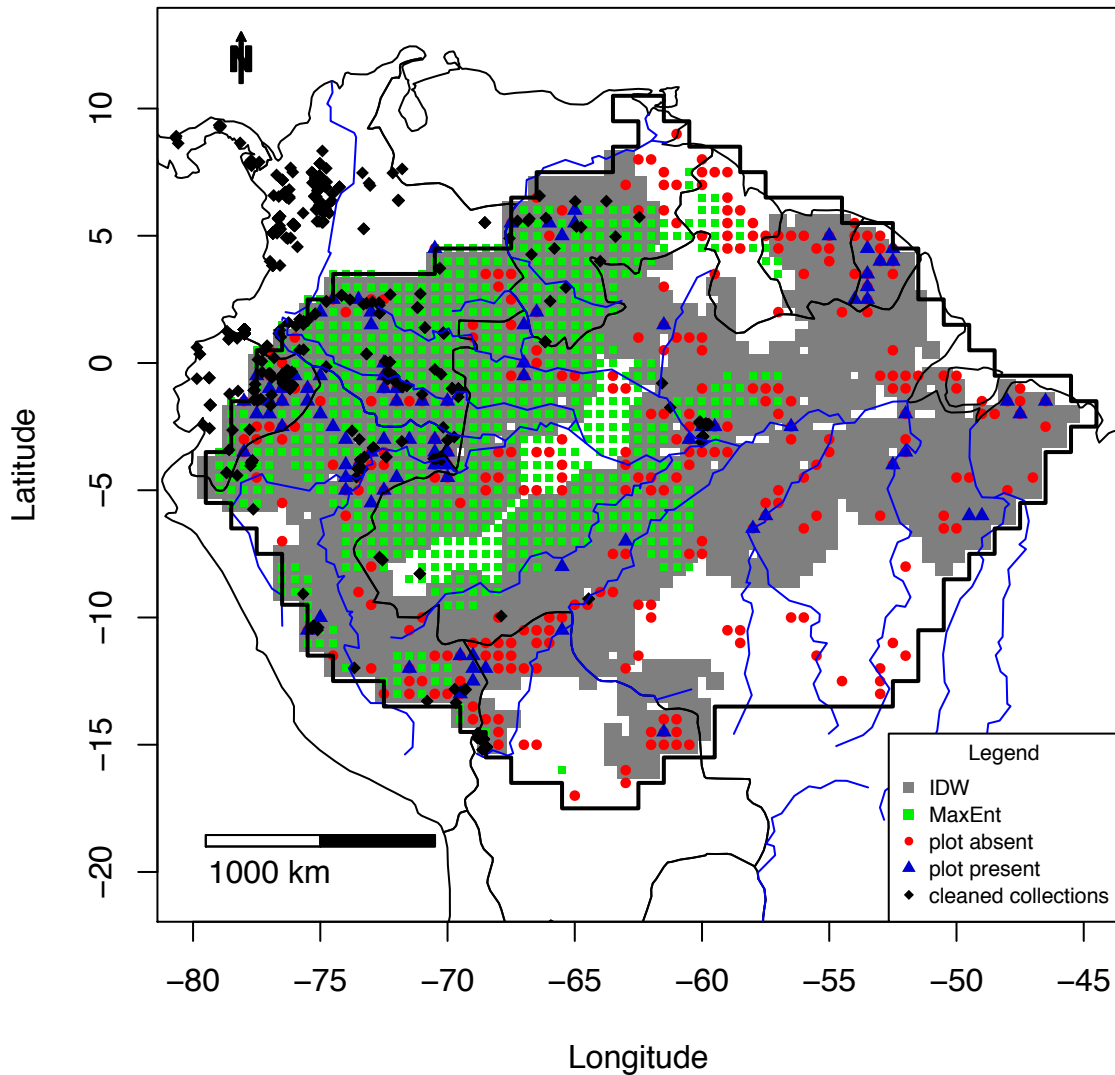

Figure S3\_121B MaxEnt map of *Pourouma\_bicolor*

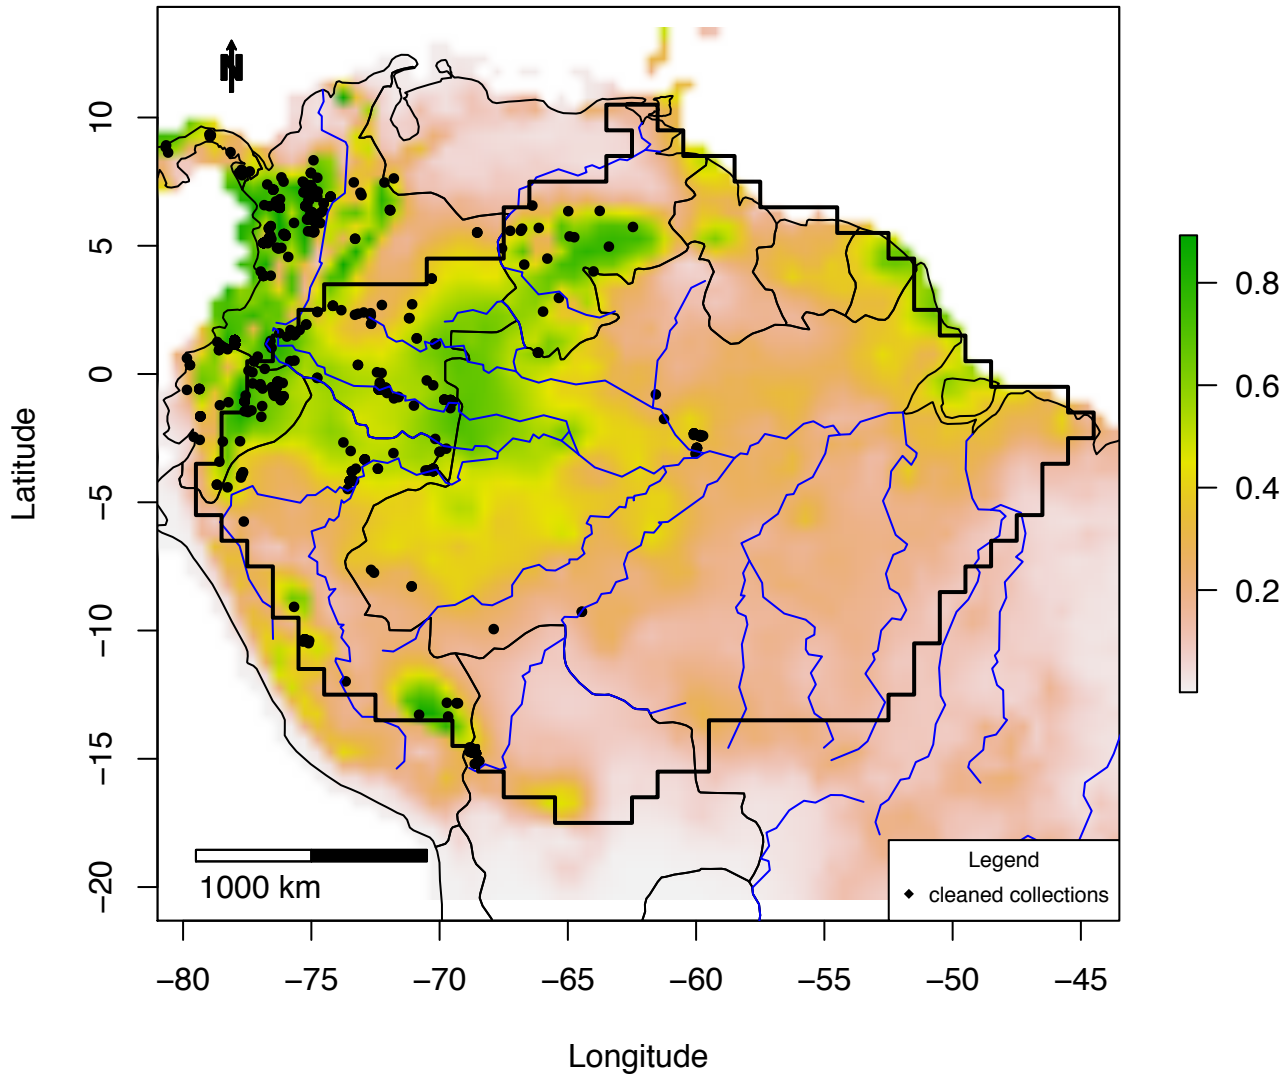

Figure S3\_121C IDW map of *Pourouma\_bicolor*:  
plots = 0 – 0.04; IDW: 0 – 0.02

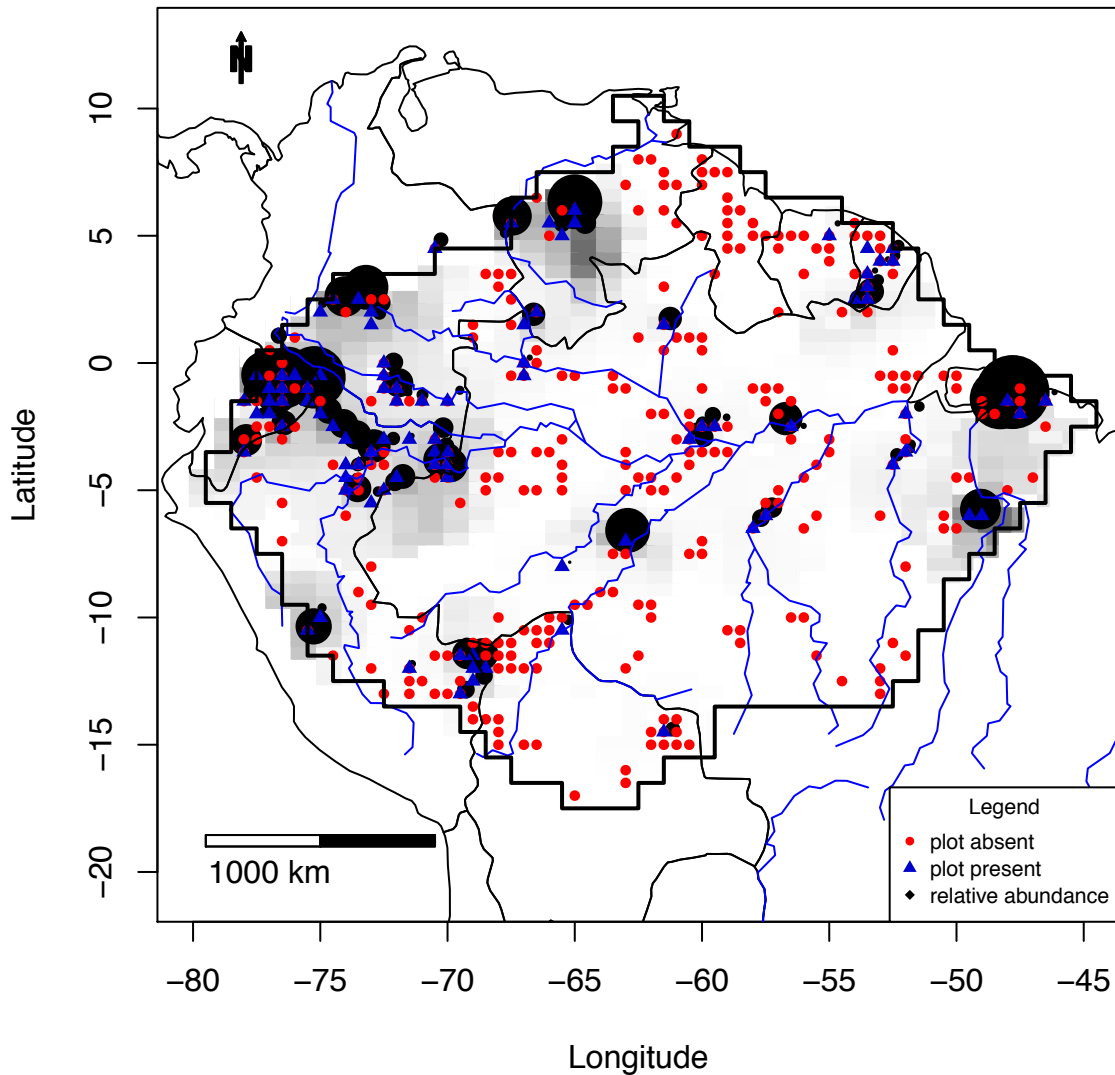

Figure S3\_122A Combined map of *Pourouma\_ cecropiifolia*

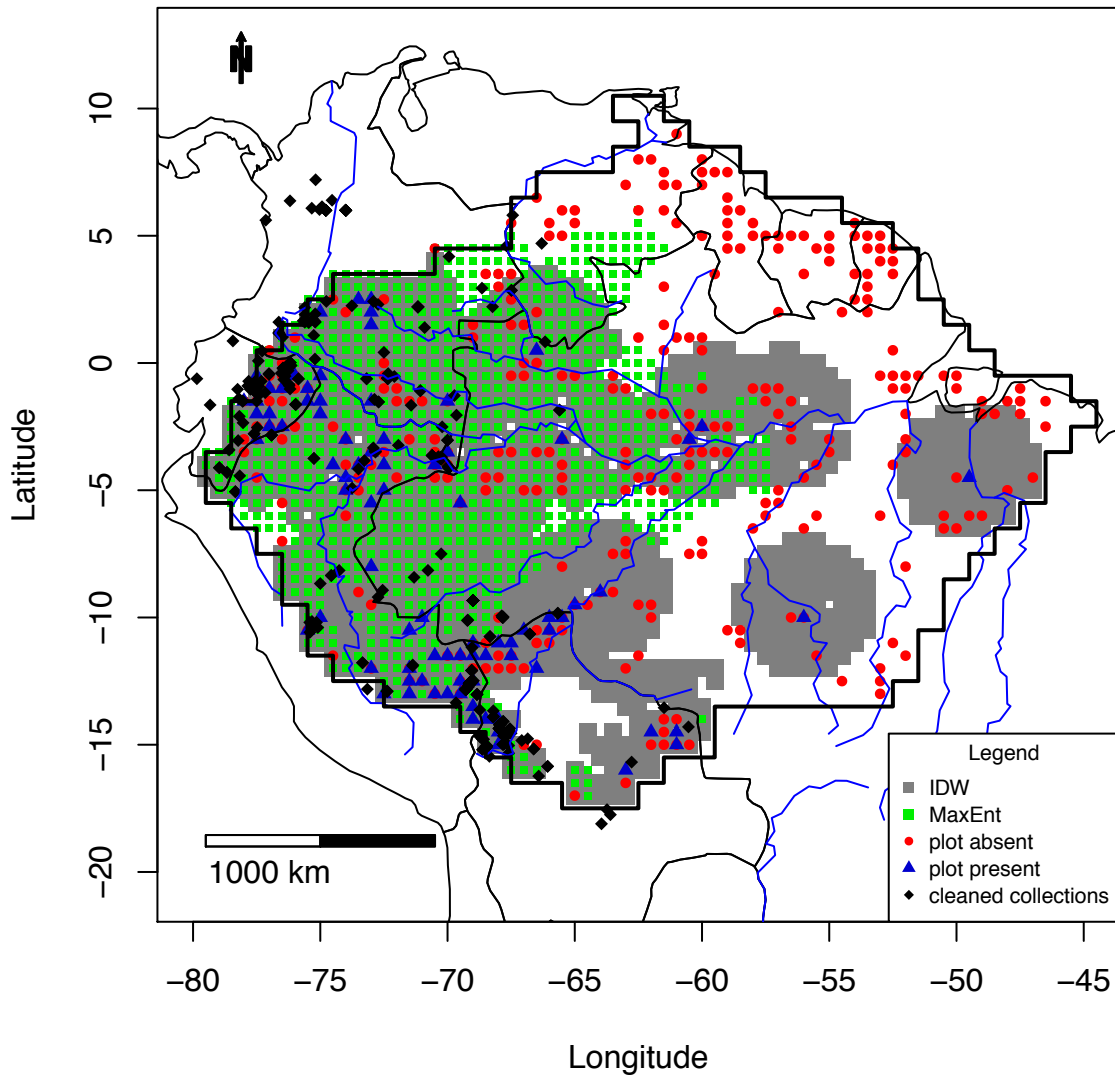

Figure S3\_122B MaxEnt map of *Pourouma\_cecropiifolia*

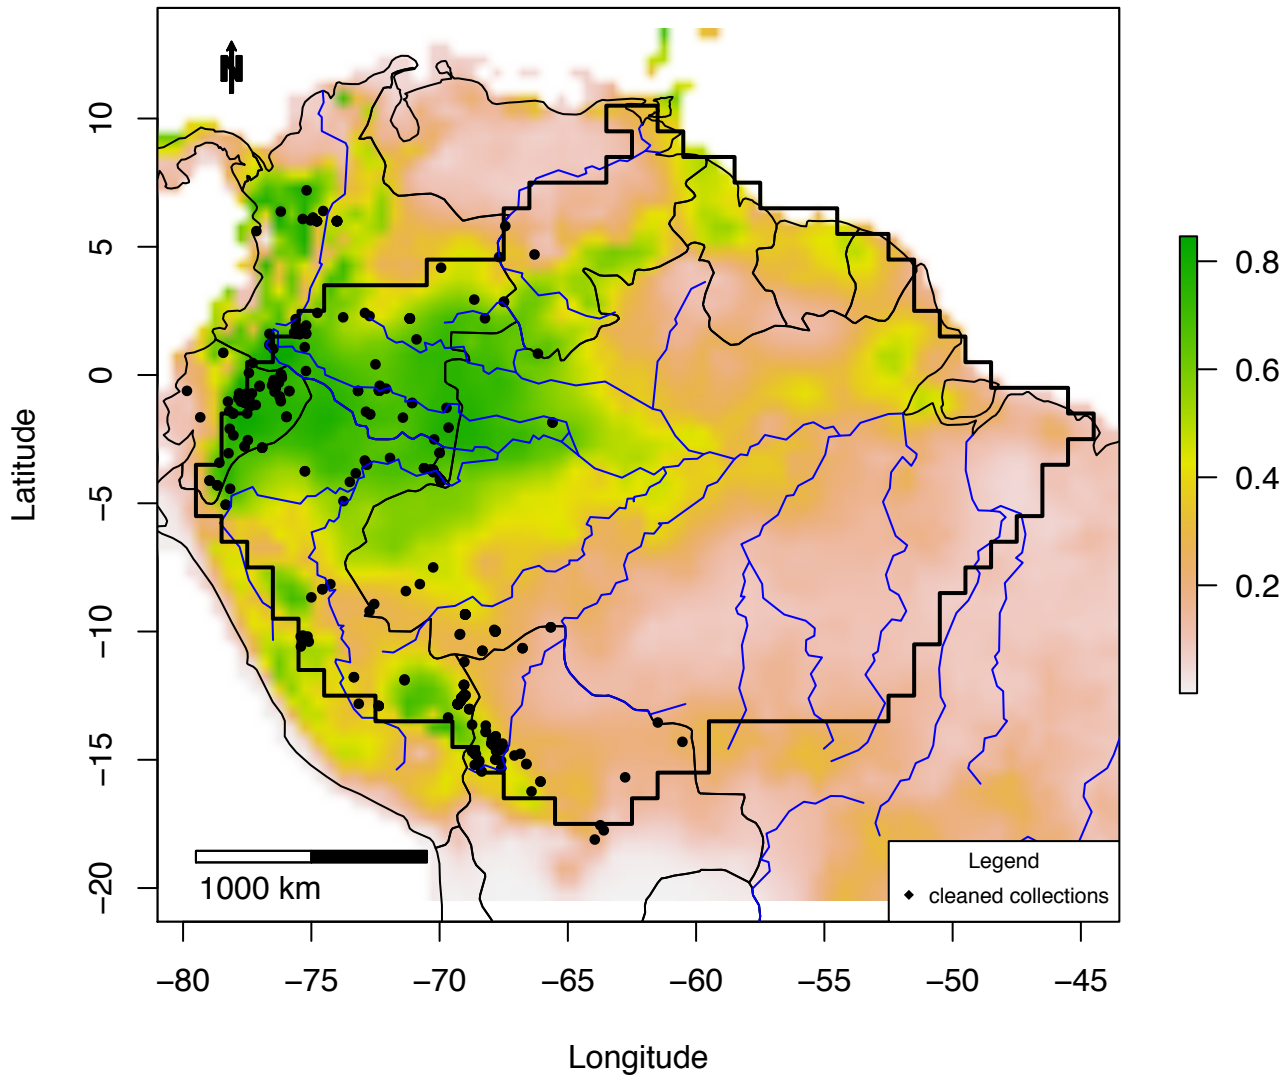

Figure S3\_122C IDW map of *Pourouma\_cecropiifolia*:  
plots =0 – 0.07; IDW: 0 – 0.04

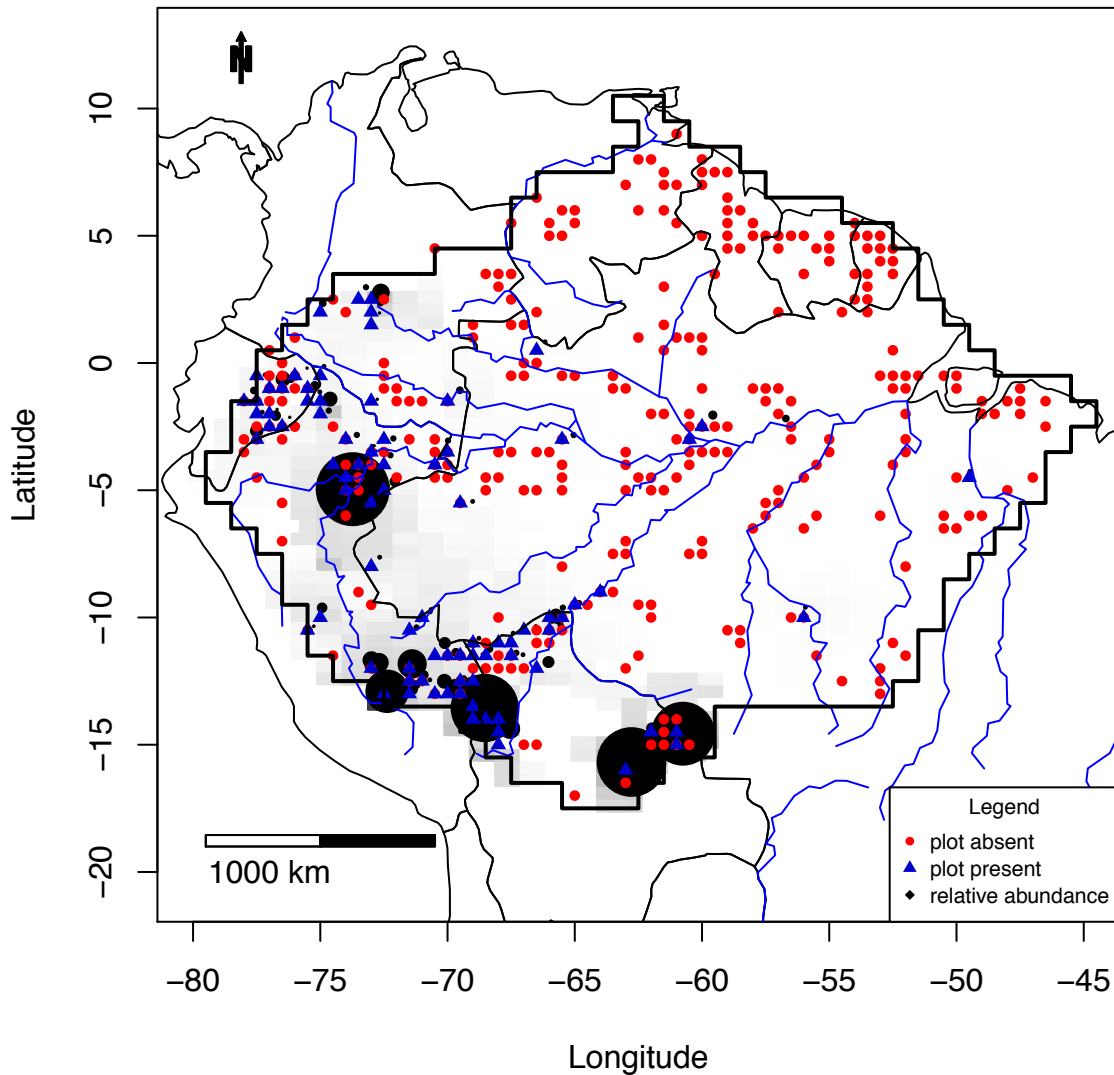

Figure S3\_123A Combined map of Pourouma\_minor

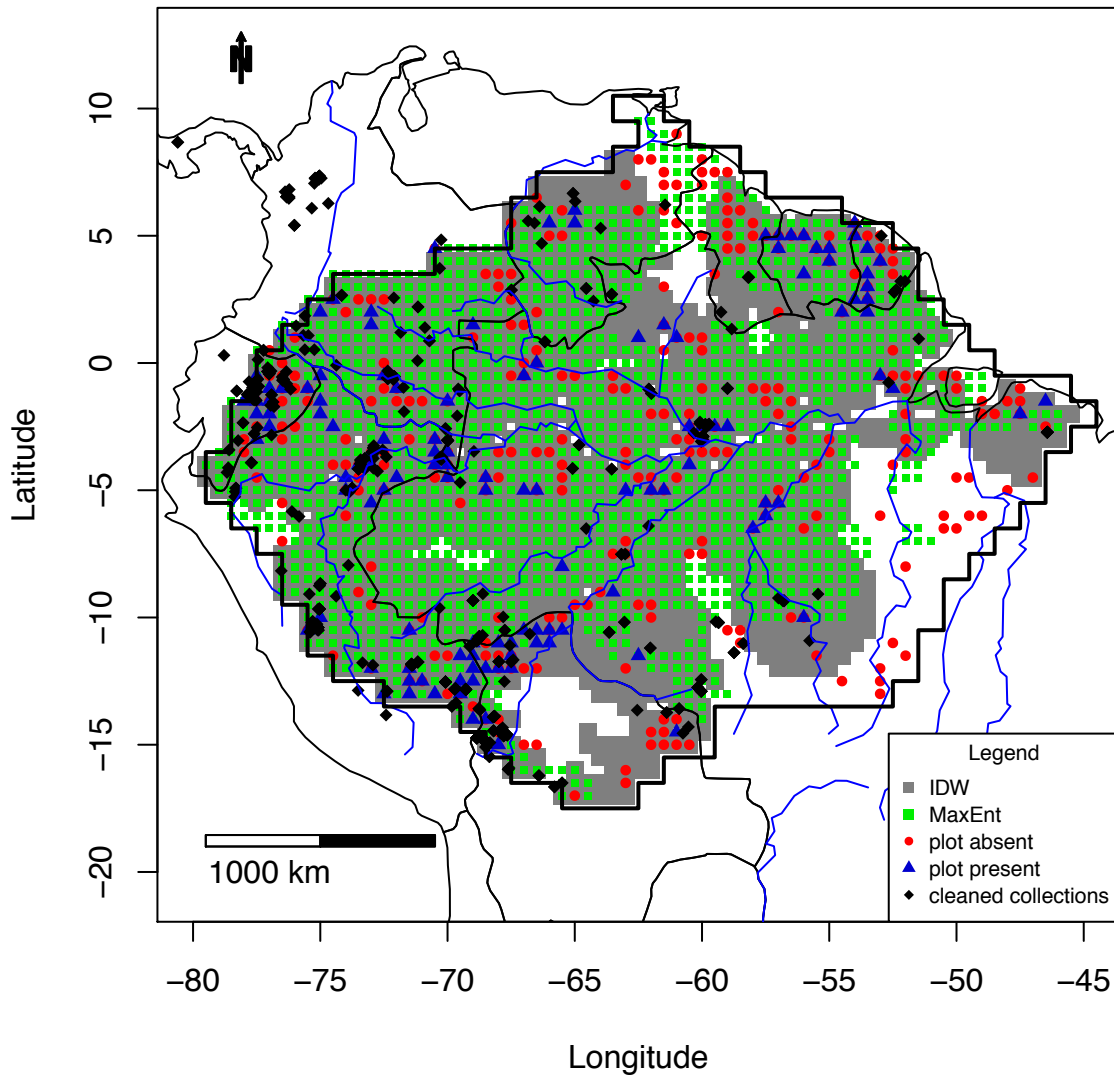



Figure S3\_123B MaxEnt map of *Pourouma\_minor*

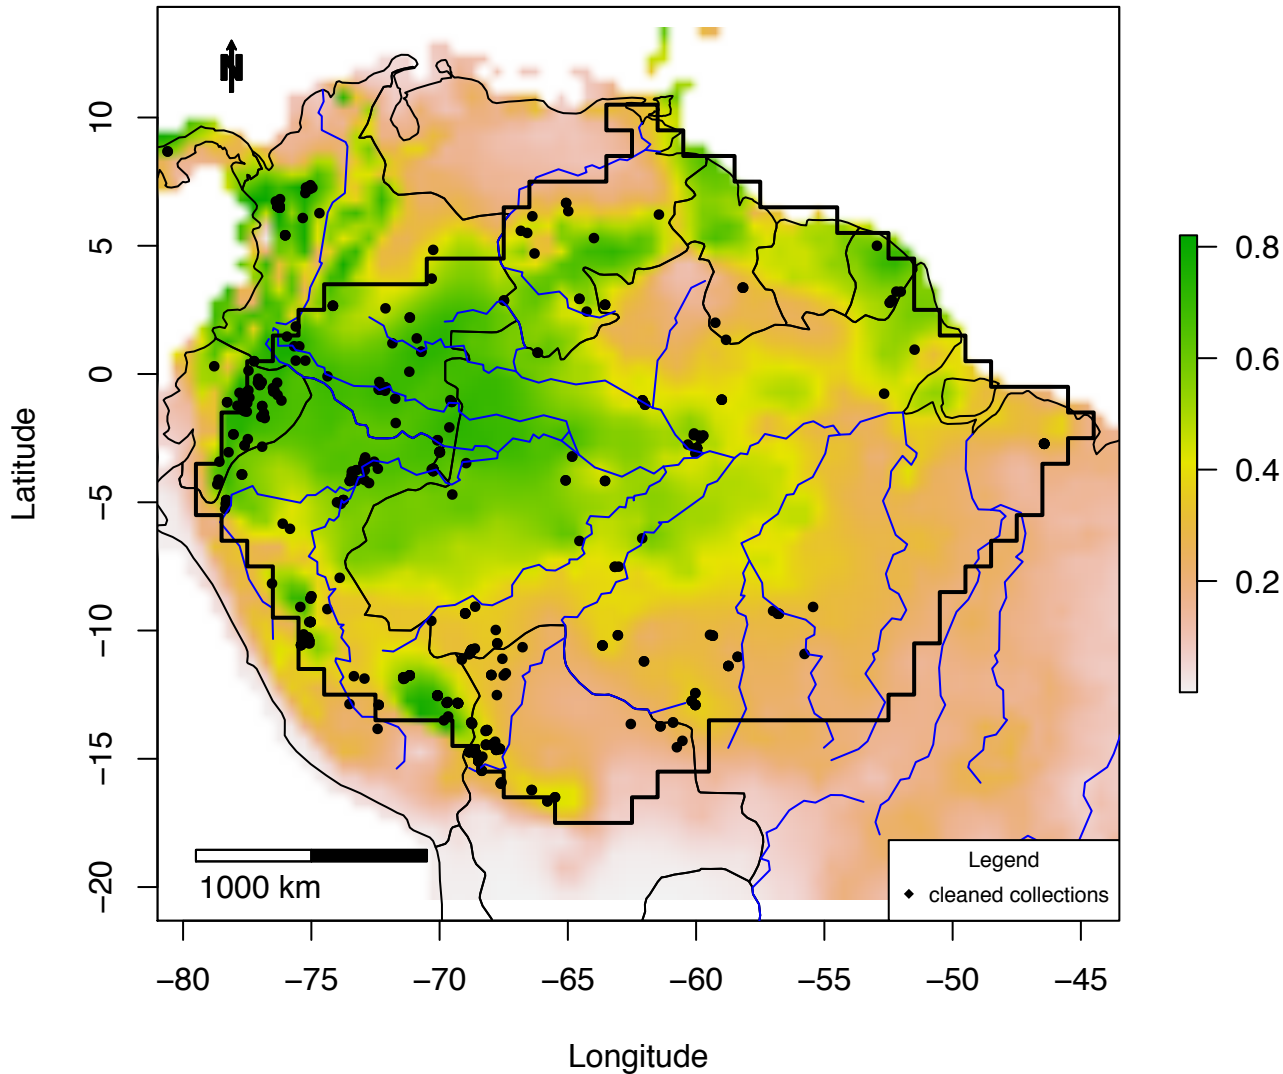

**Figure S3\_123C IDW map of Pourouma\_minor:  
plots =0 – 0.17; IDW: 0 – 0.07**

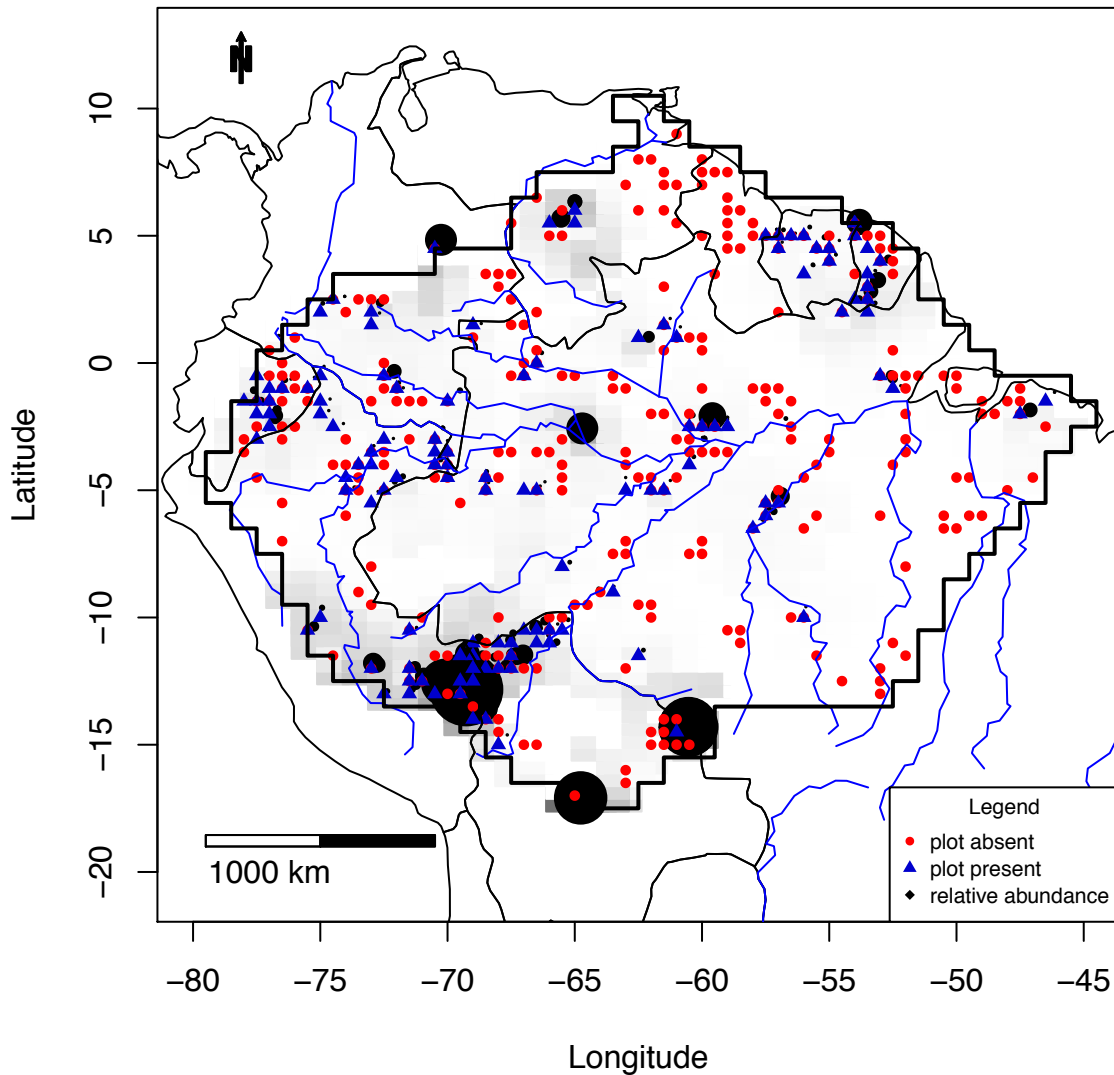

Figure S3\_124A Combined map of *Pouteria\_cuspidata*

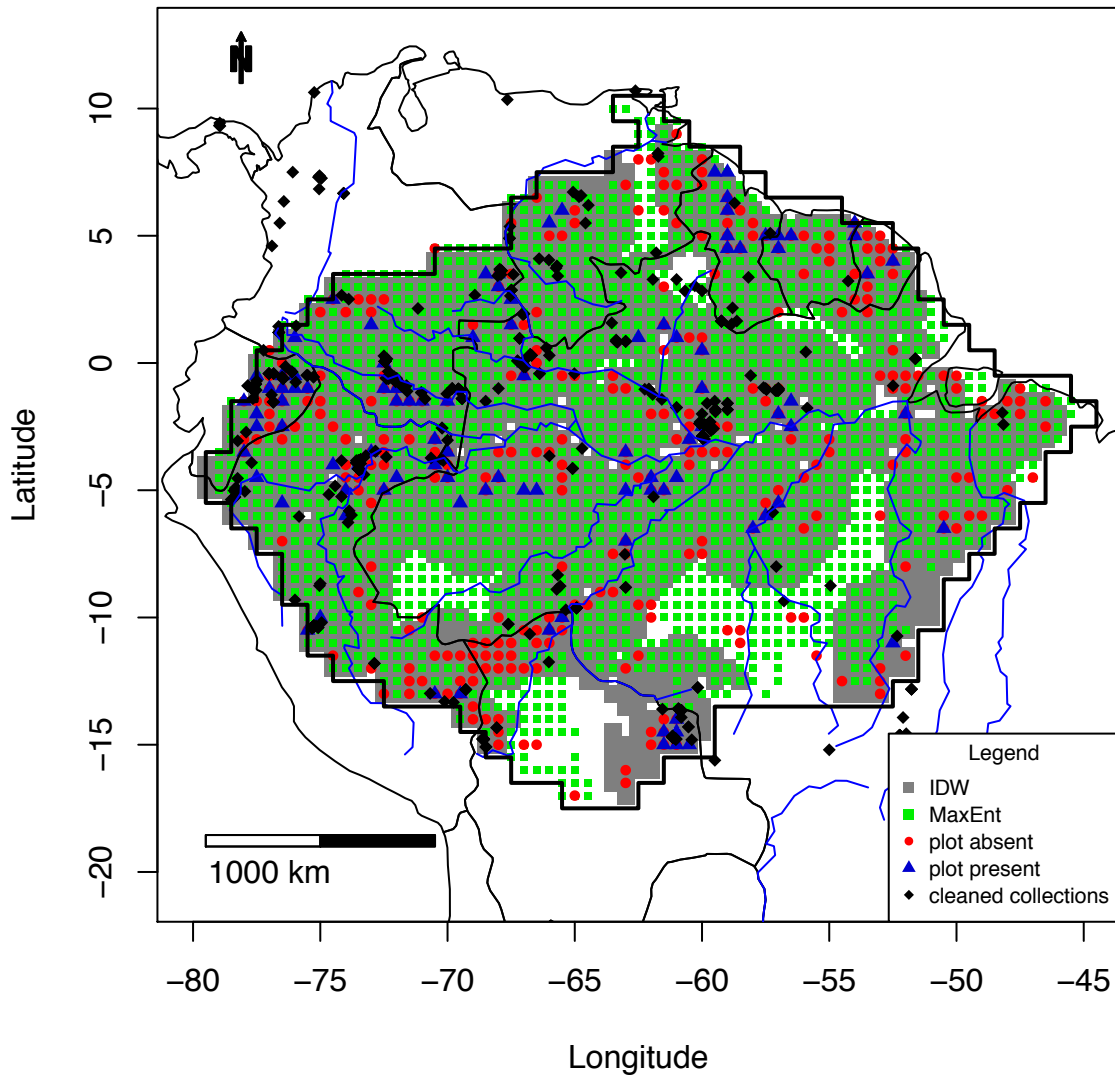

Figure S3\_124B MaxEnt map of *Pouteria\_cuspidata*

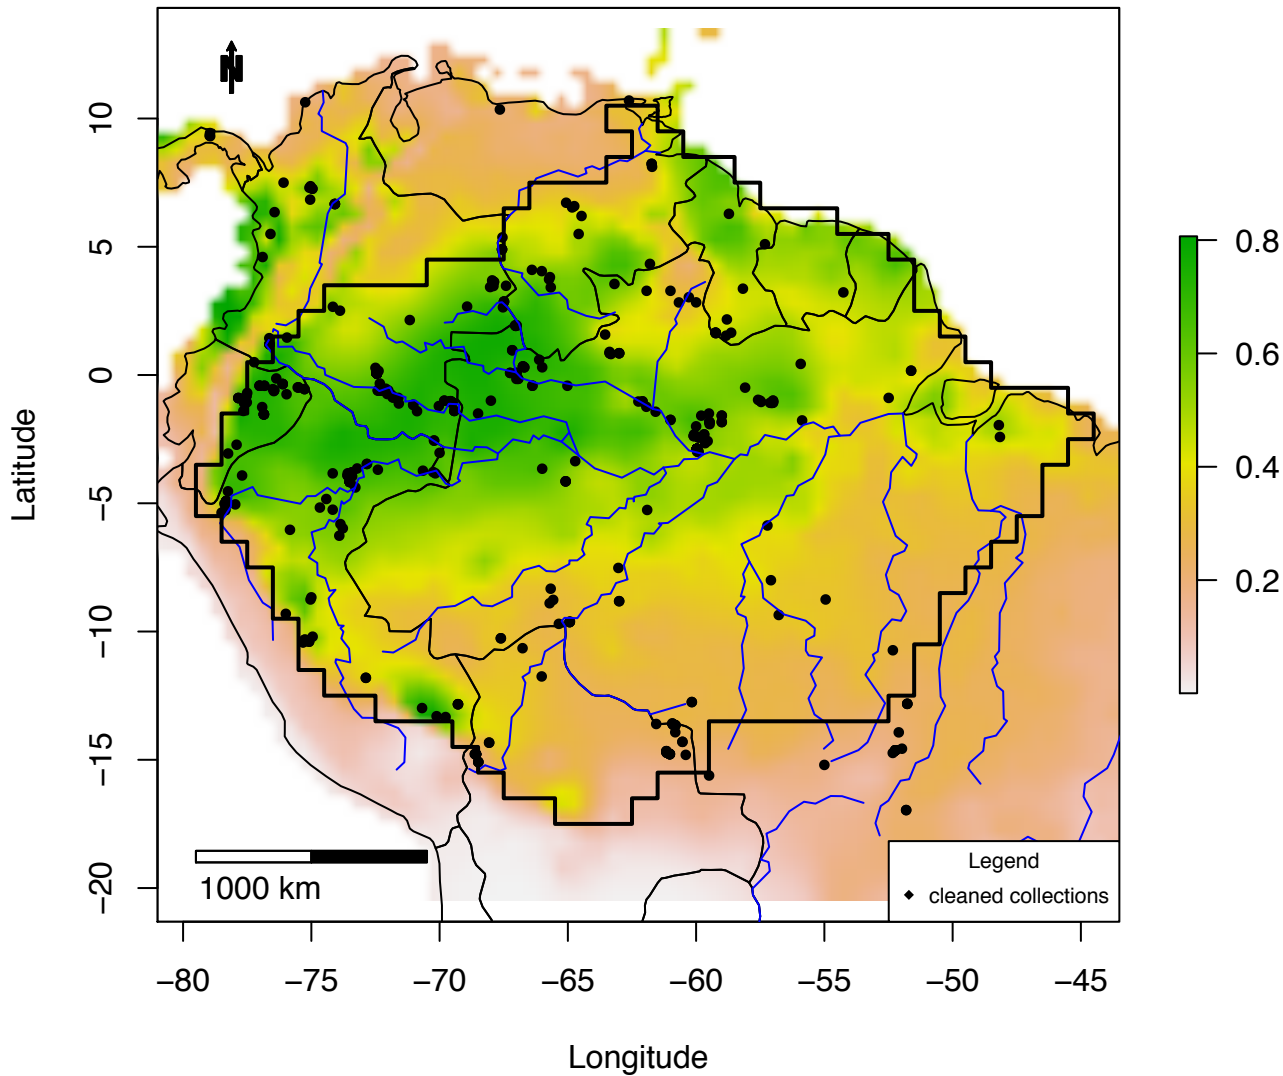

**Figure S3\_124C IDW map of *Pouteria\_cuspidata*:**  
**plots =0 – 0.1; IDW: 0 – 0.04**

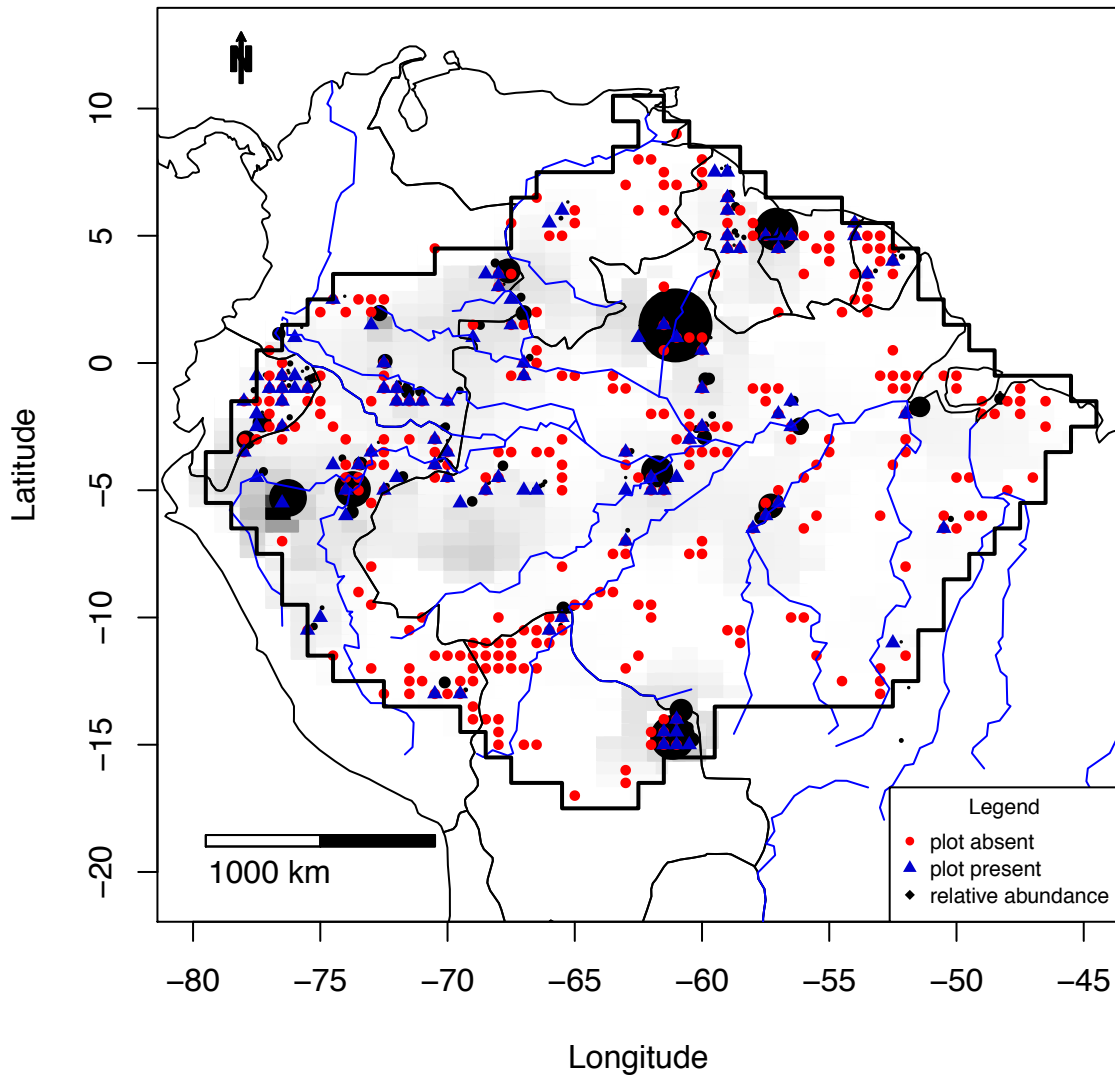

Figure S3\_125A Combined map of *Pouteria\_elegans*

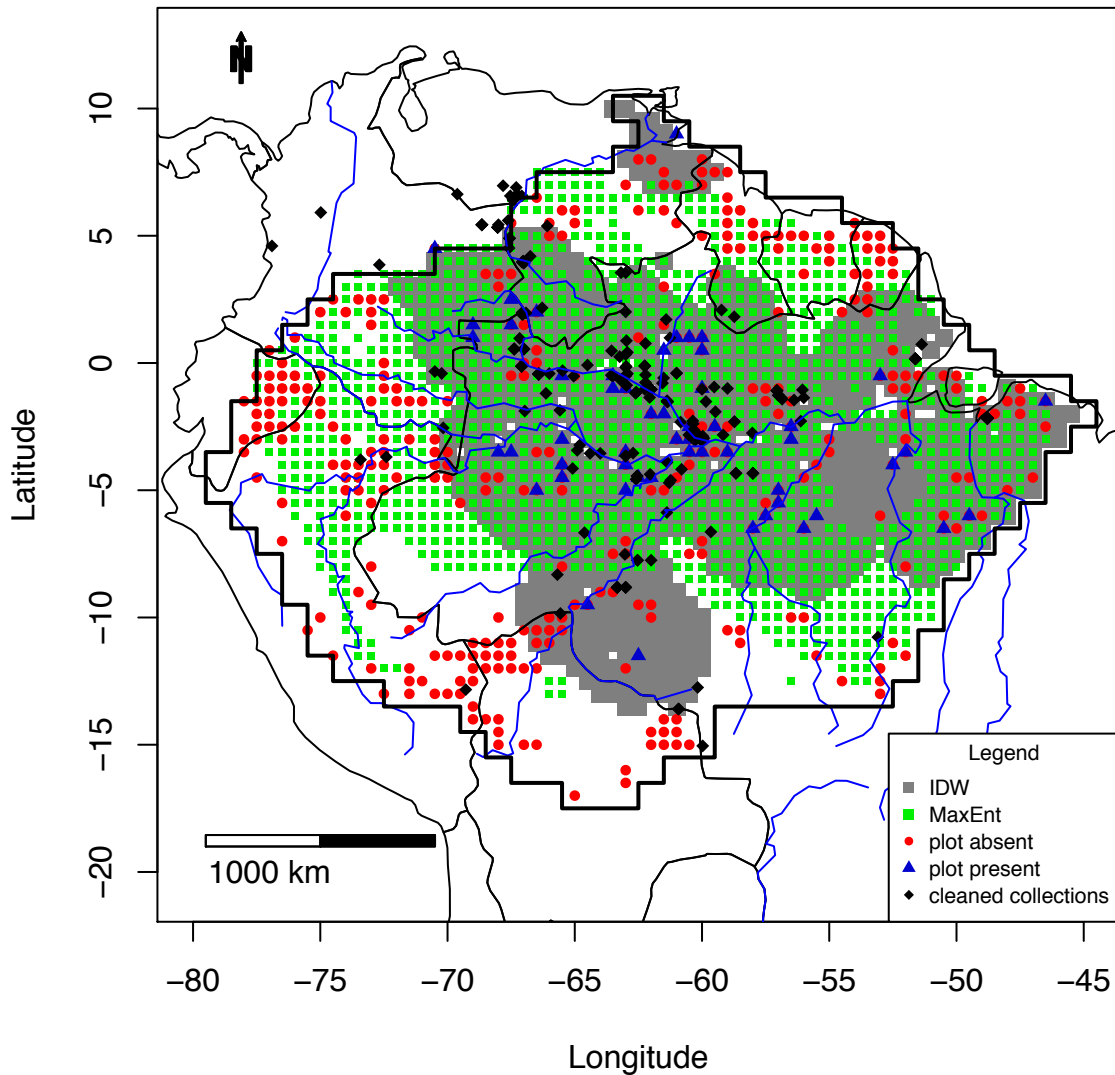

Figure S3\_125B MaxEnt map of *Pouteria\_elegans*

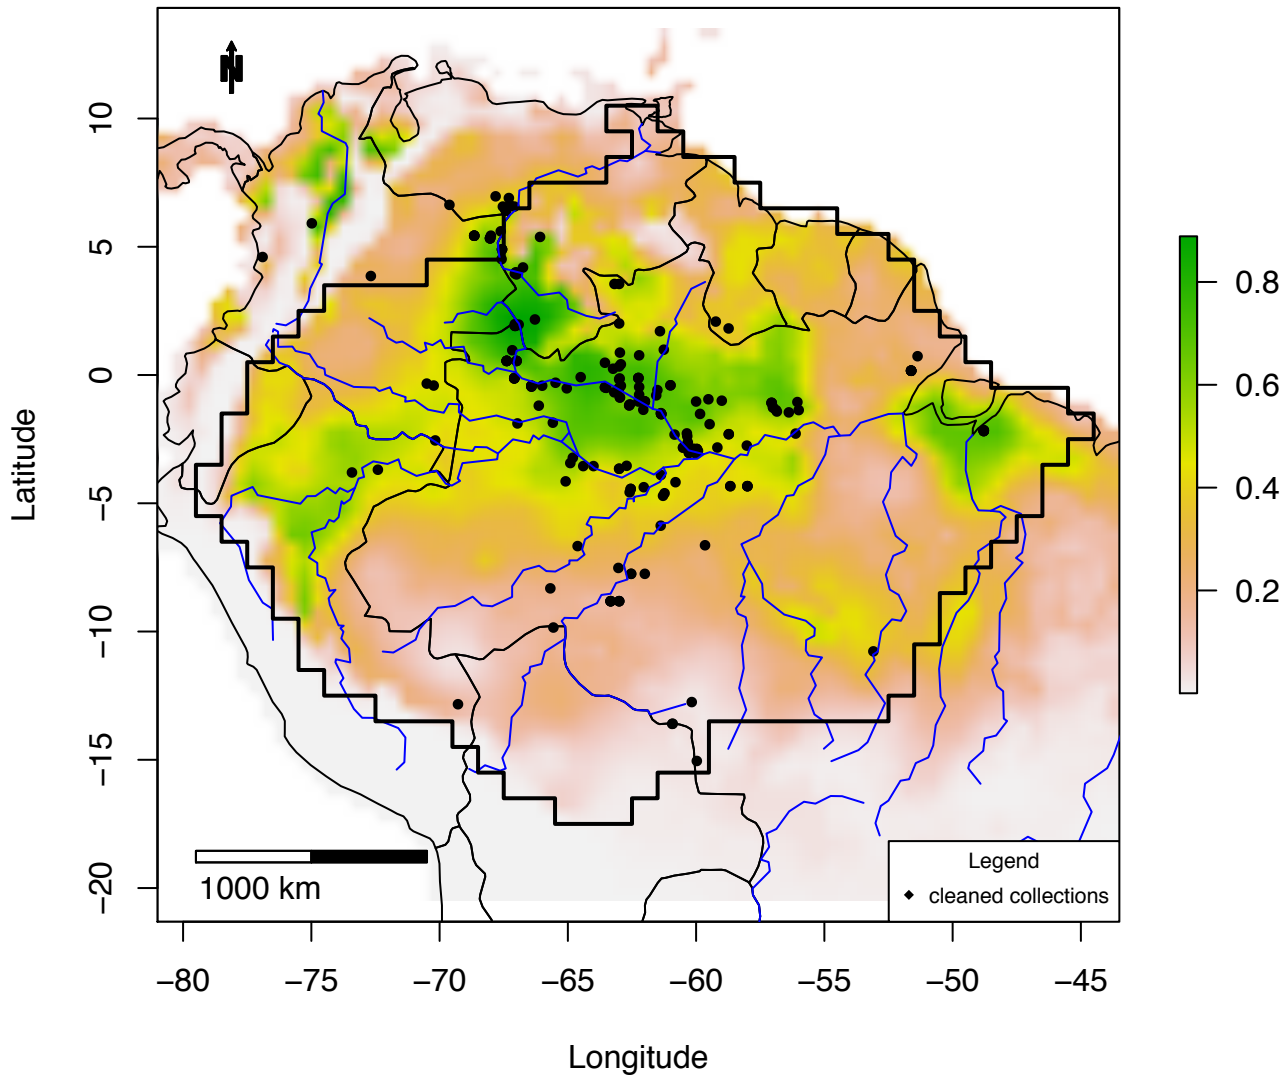

**Figure S3\_125C IDW map of *Pouteria\_elegans*:**  
**plots =0 – 0.32; IDW: 0 – 0.06**

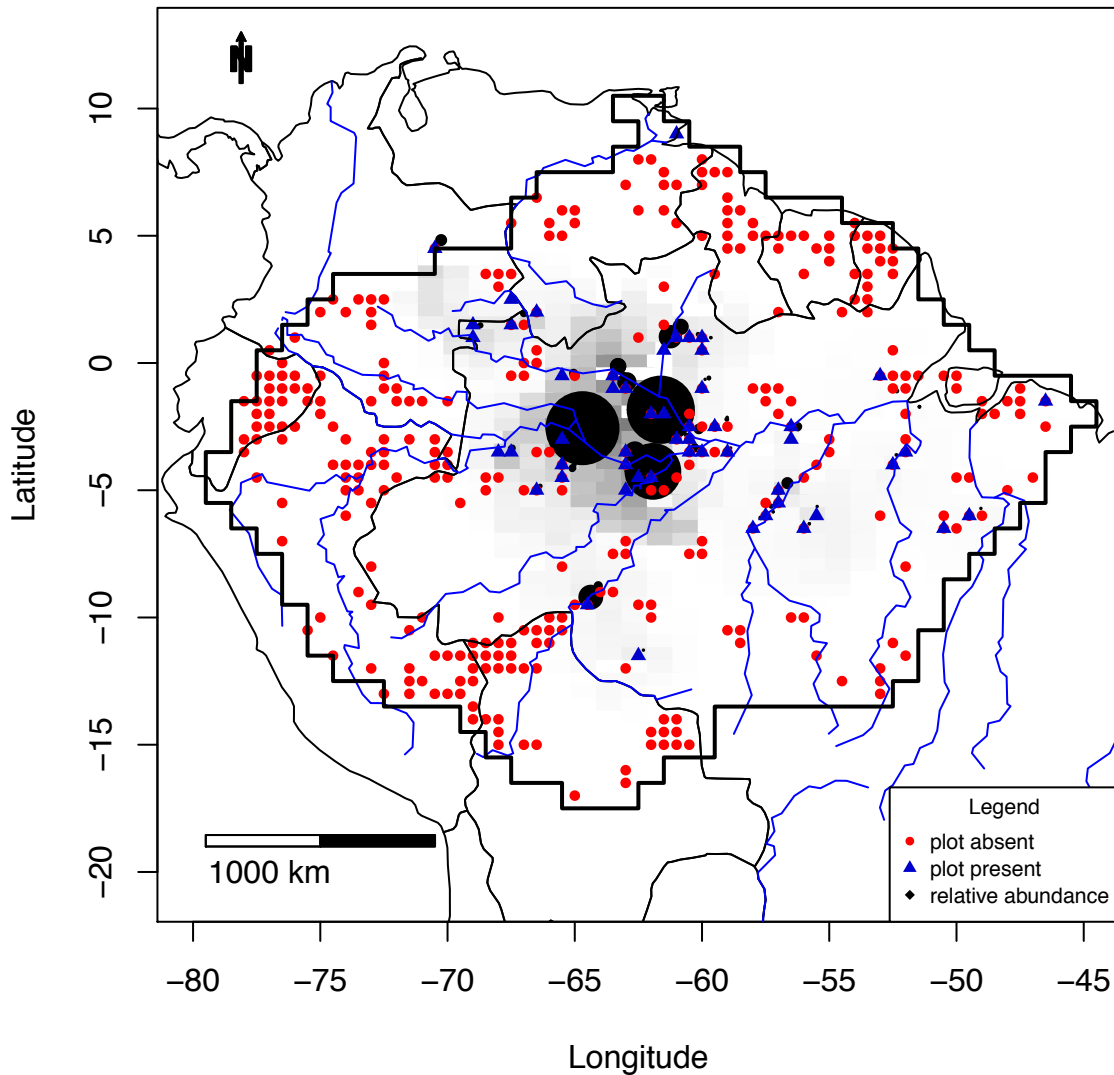



Figure S3\_126A Combined map of *Protium\_apiculatum*

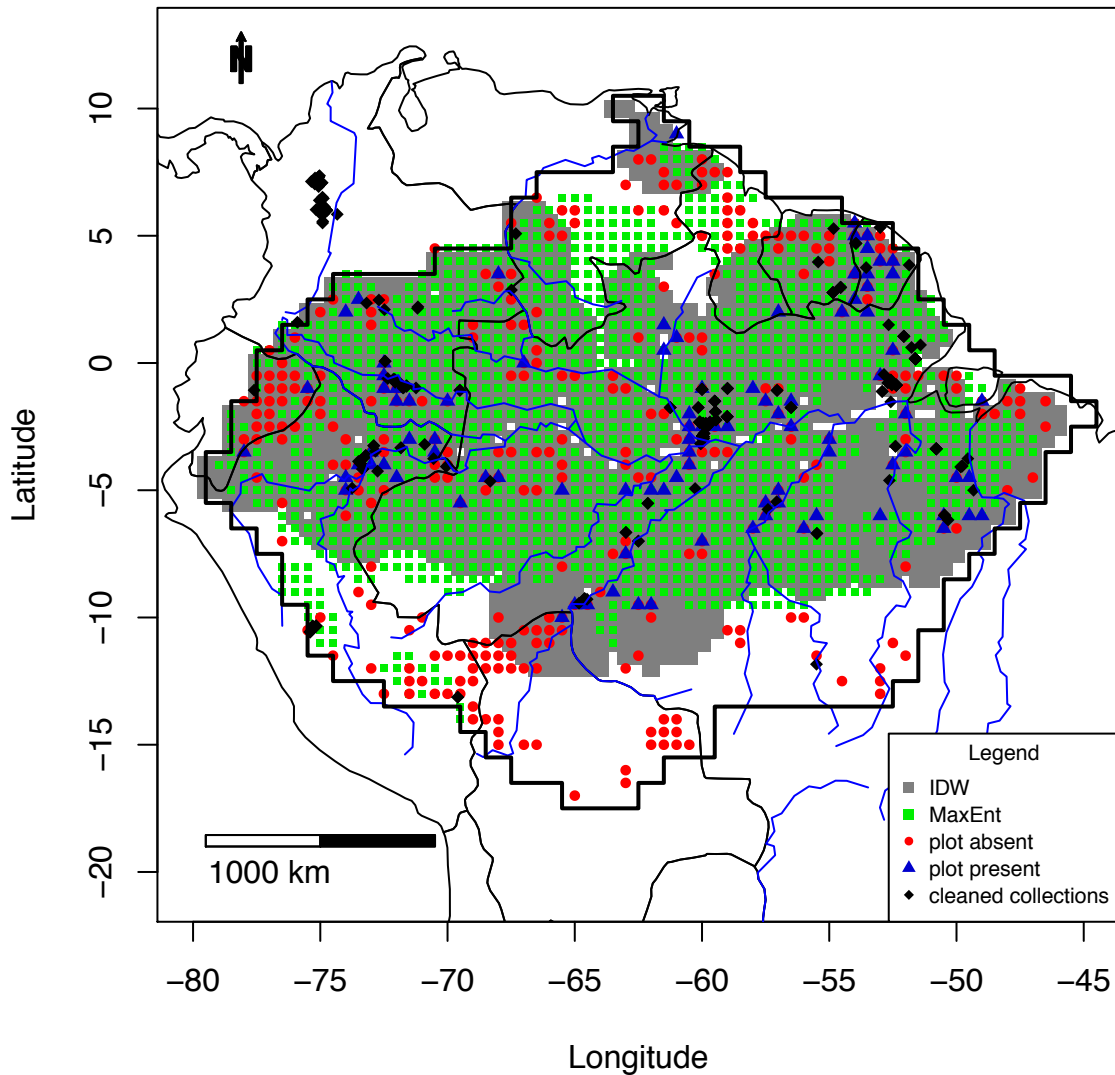

Figure S3\_126B MaxEnt map of *Protium\_apiculatum*

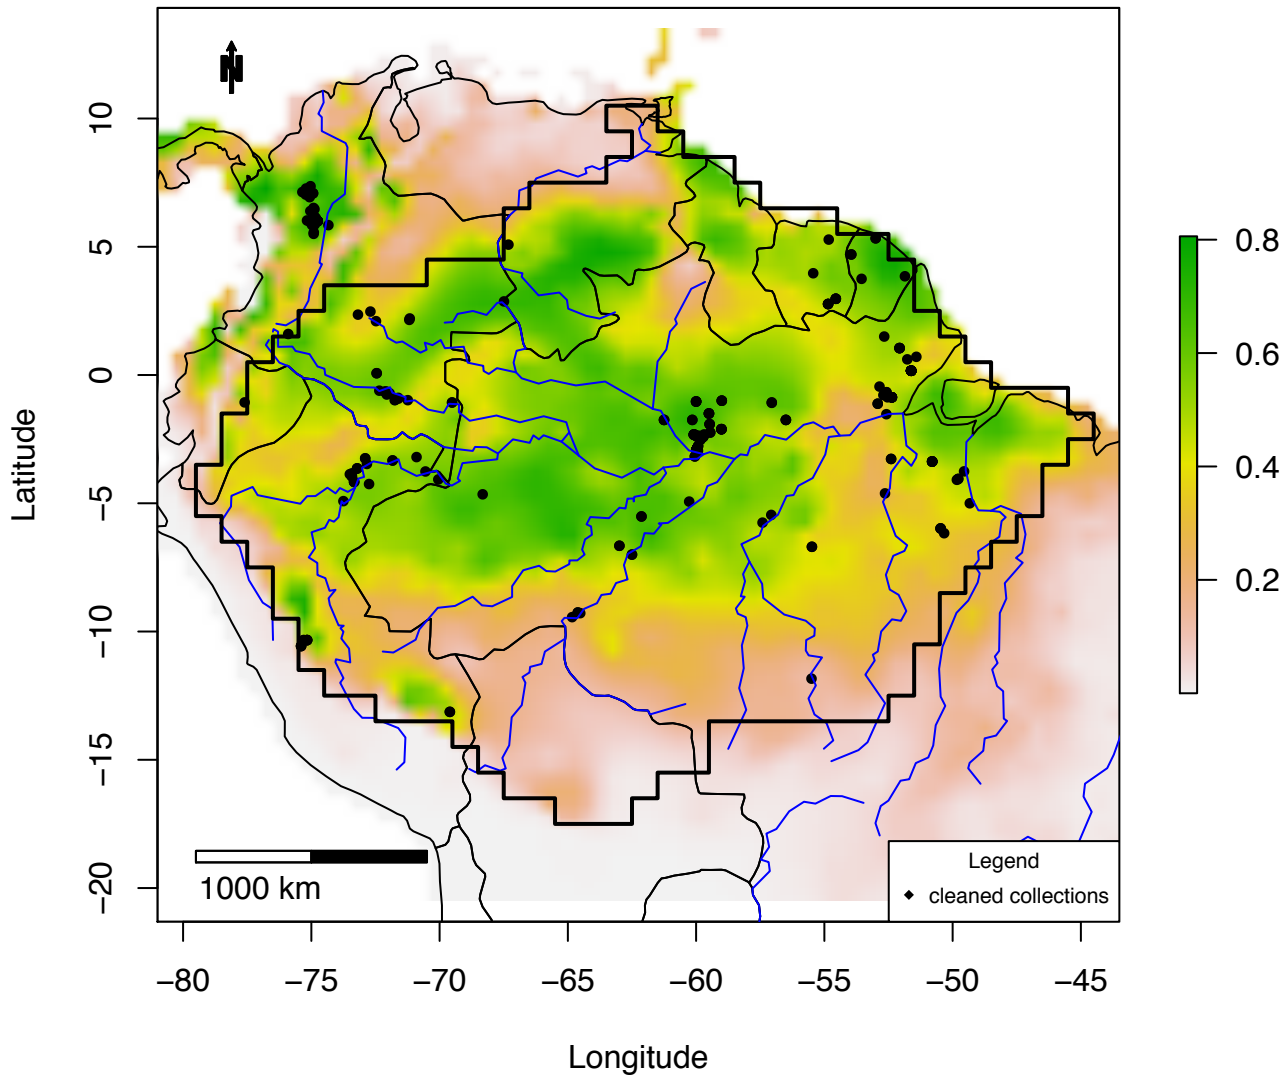

Figure S3\_126C IDW map of *Protium\_apiculatum*:  
plots =0 – 0.18; IDW: 0 – 0.05

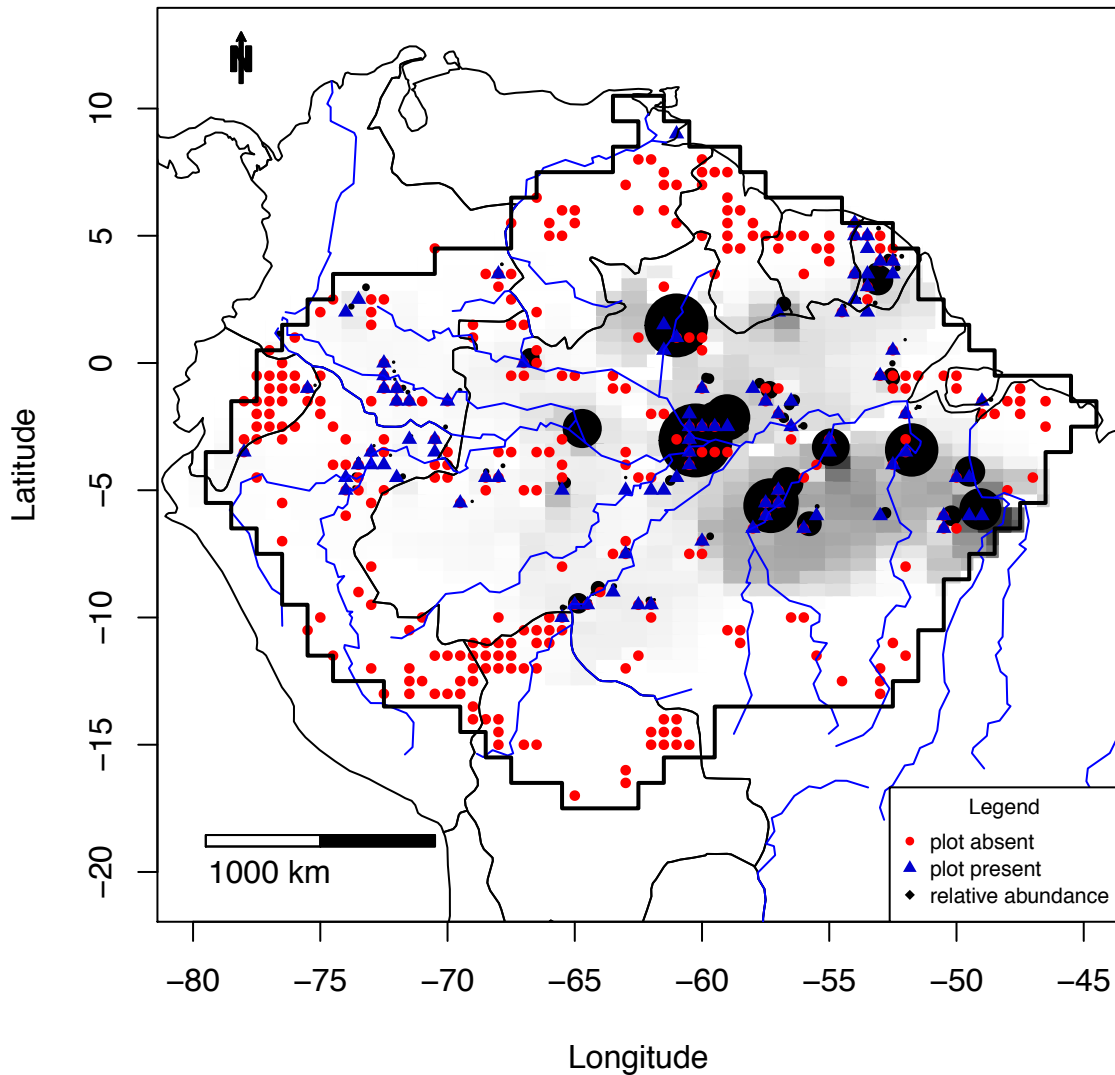

Figure S3\_127A Combined map of *Protium\_aracouchini*

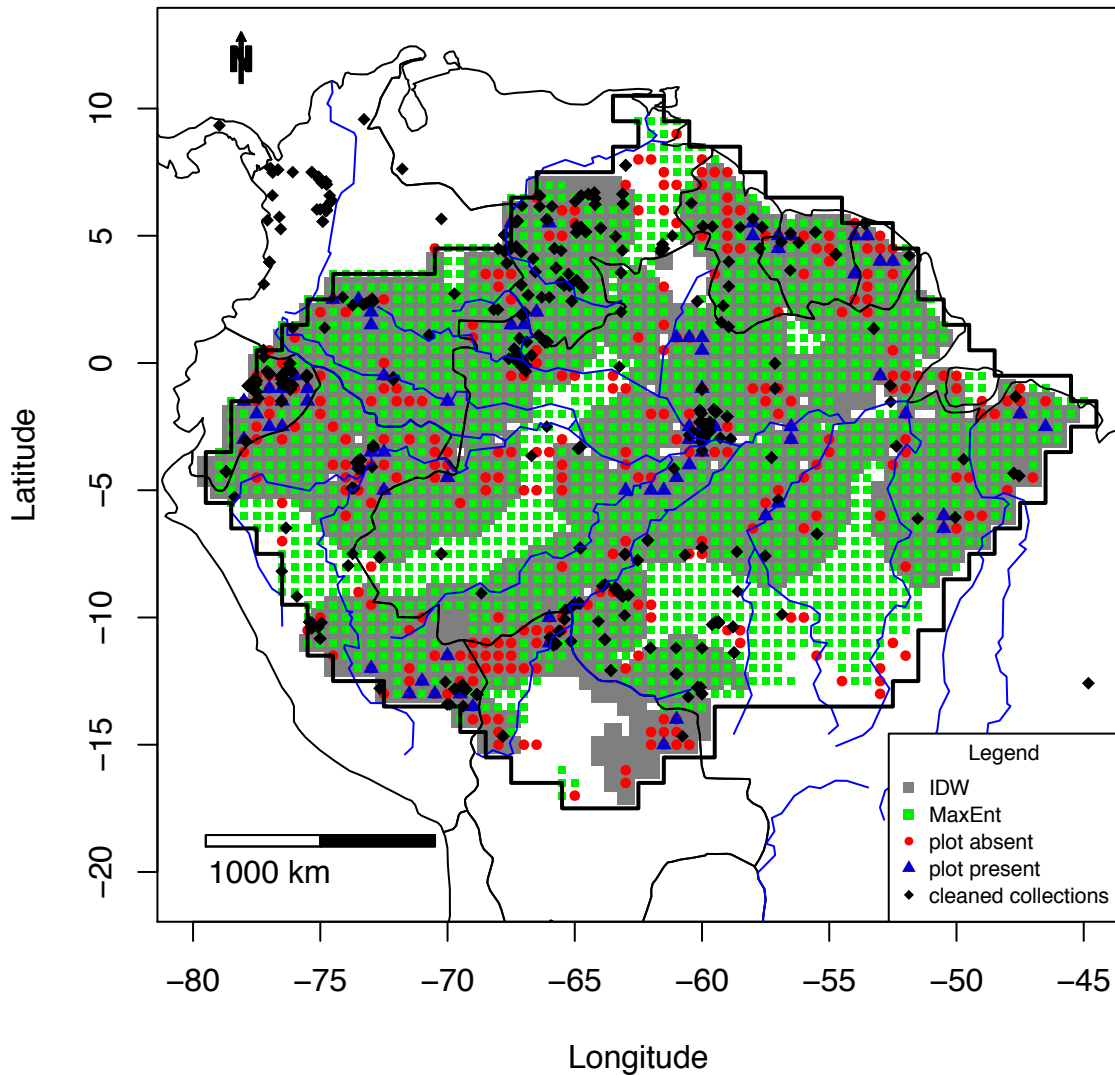

Figure S3\_127B MaxEnt map of *Protium\_aracouchini*

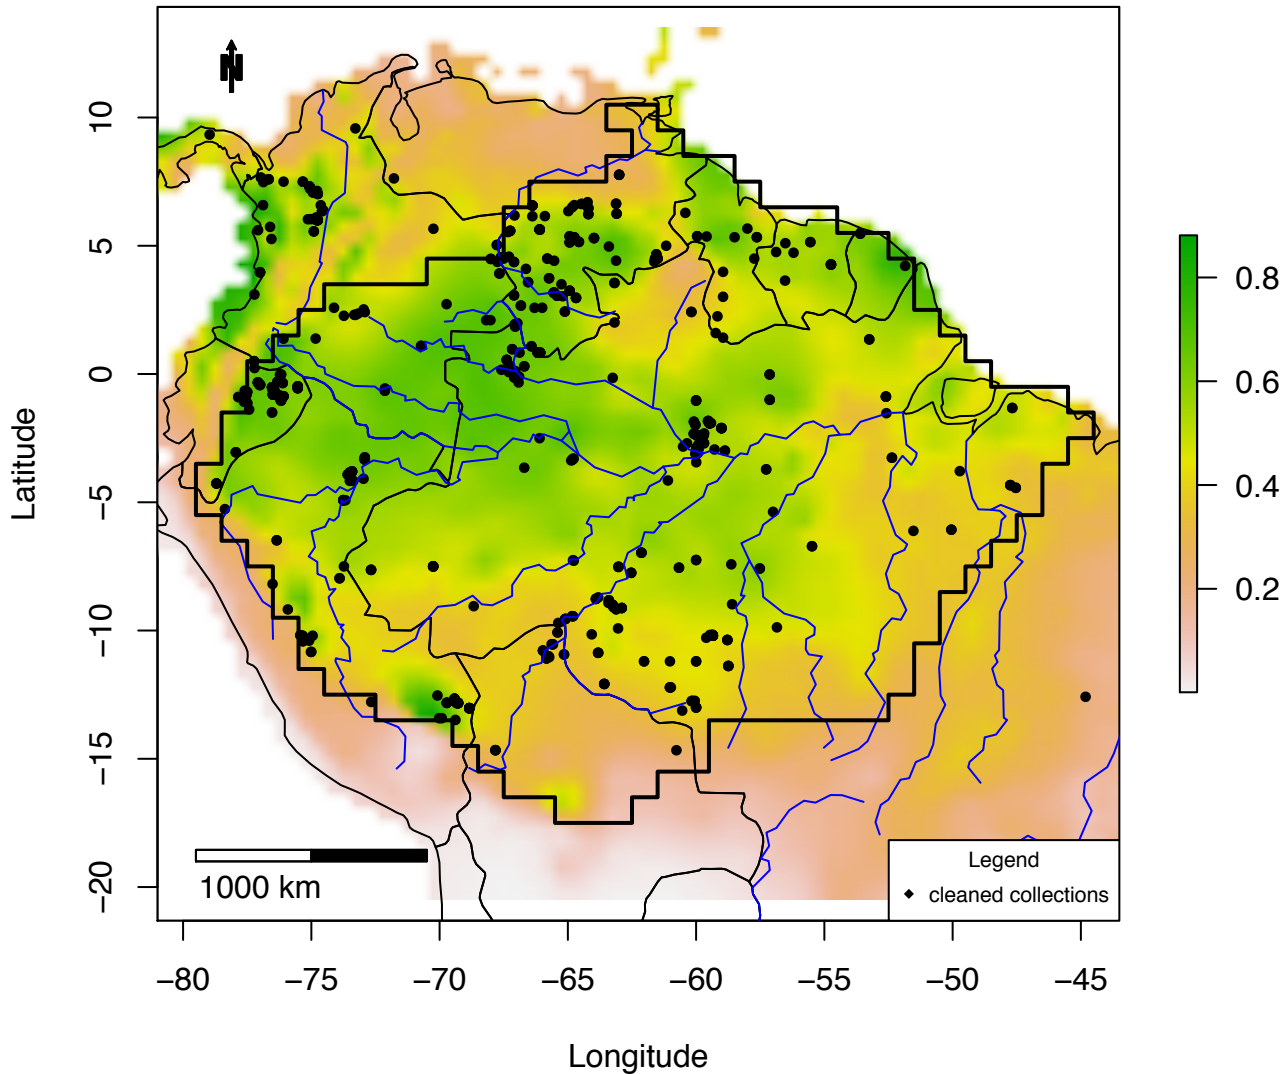

Figure S3\_127C IDW map of *Protium\_aracouchini*:  
plots =0 – 0.08; IDW: 0 – 0.03

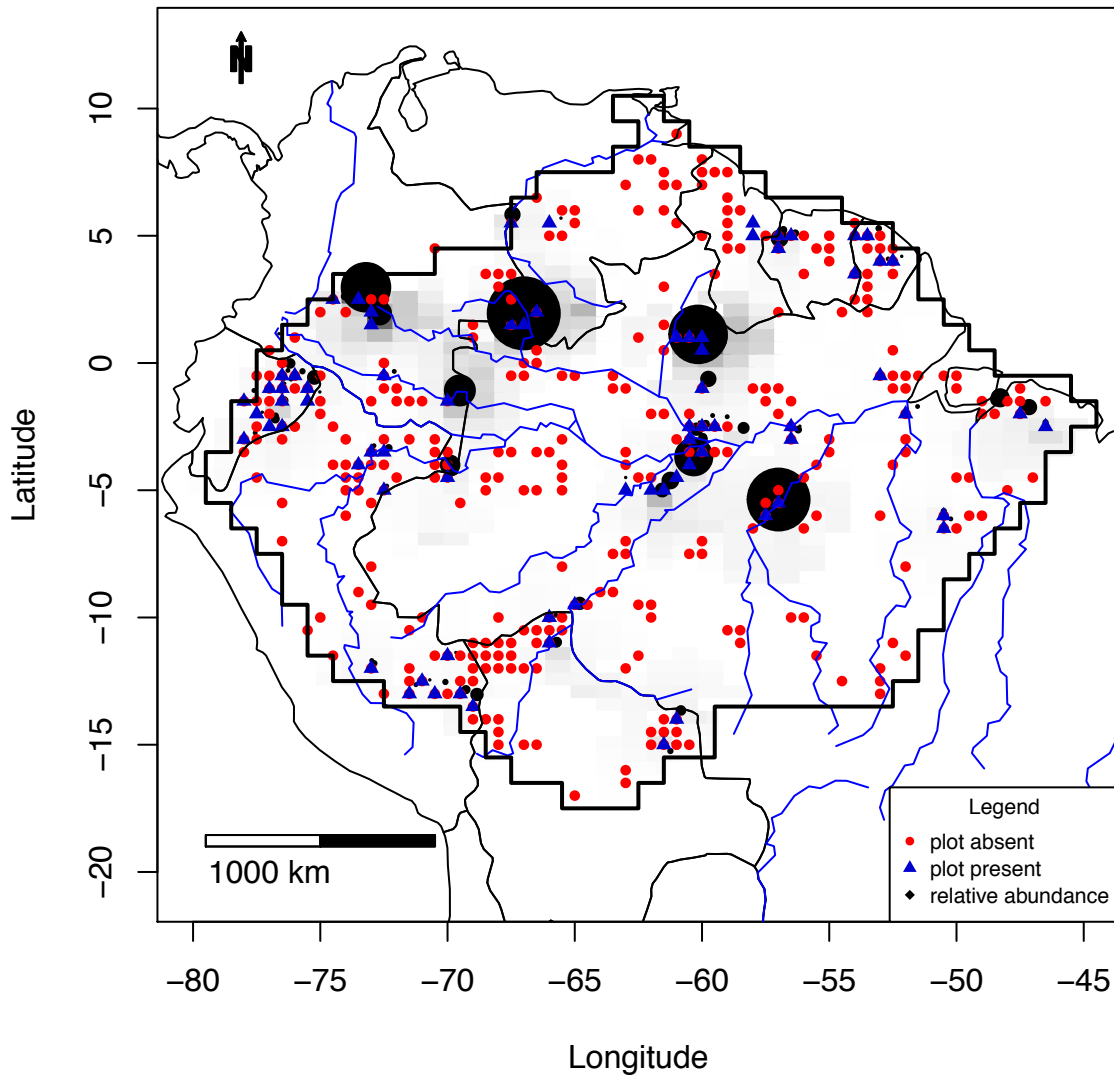

Figure S3\_128A Combined map of *Protium\_decandrum*

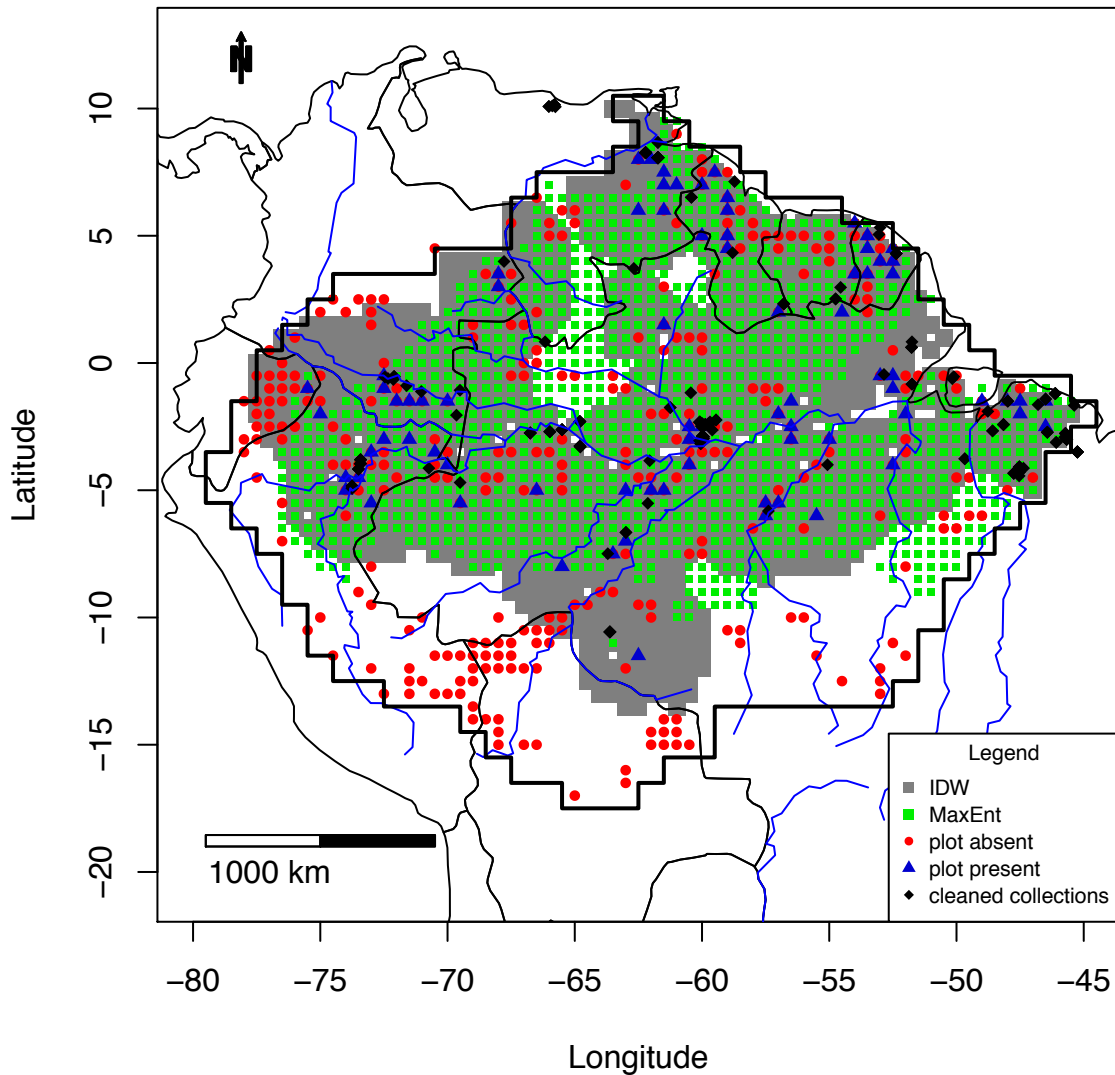

Figure S3\_128B MaxEnt map of *Protium\_decandrum*

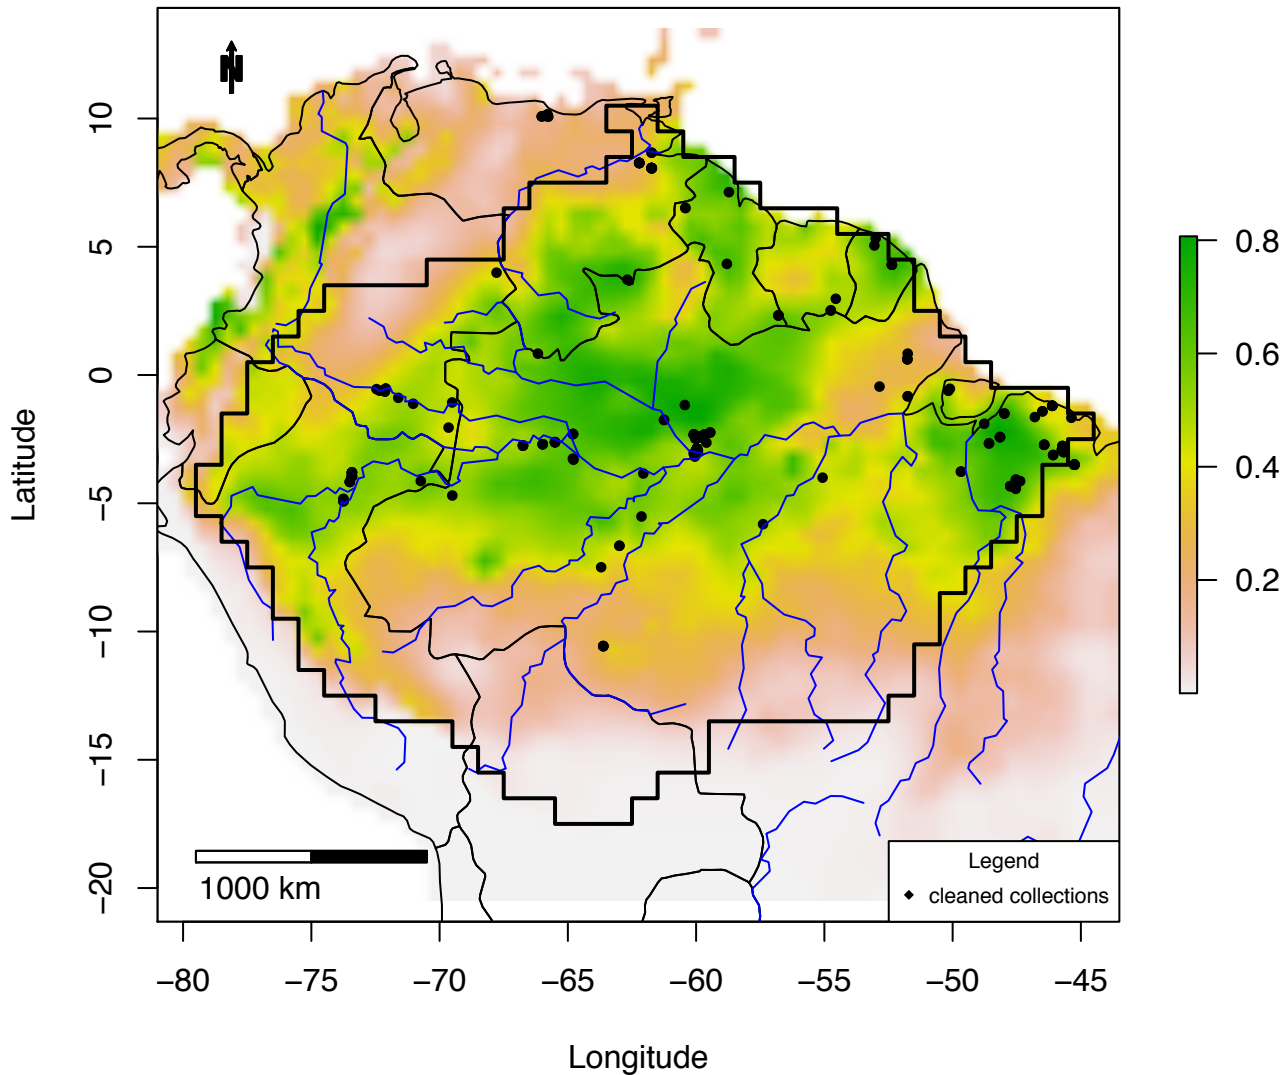



Figure S3\_128C IDW map of *Protium decandrum*:  
plots =0 – 0.16; IDW: 0 – 0.07

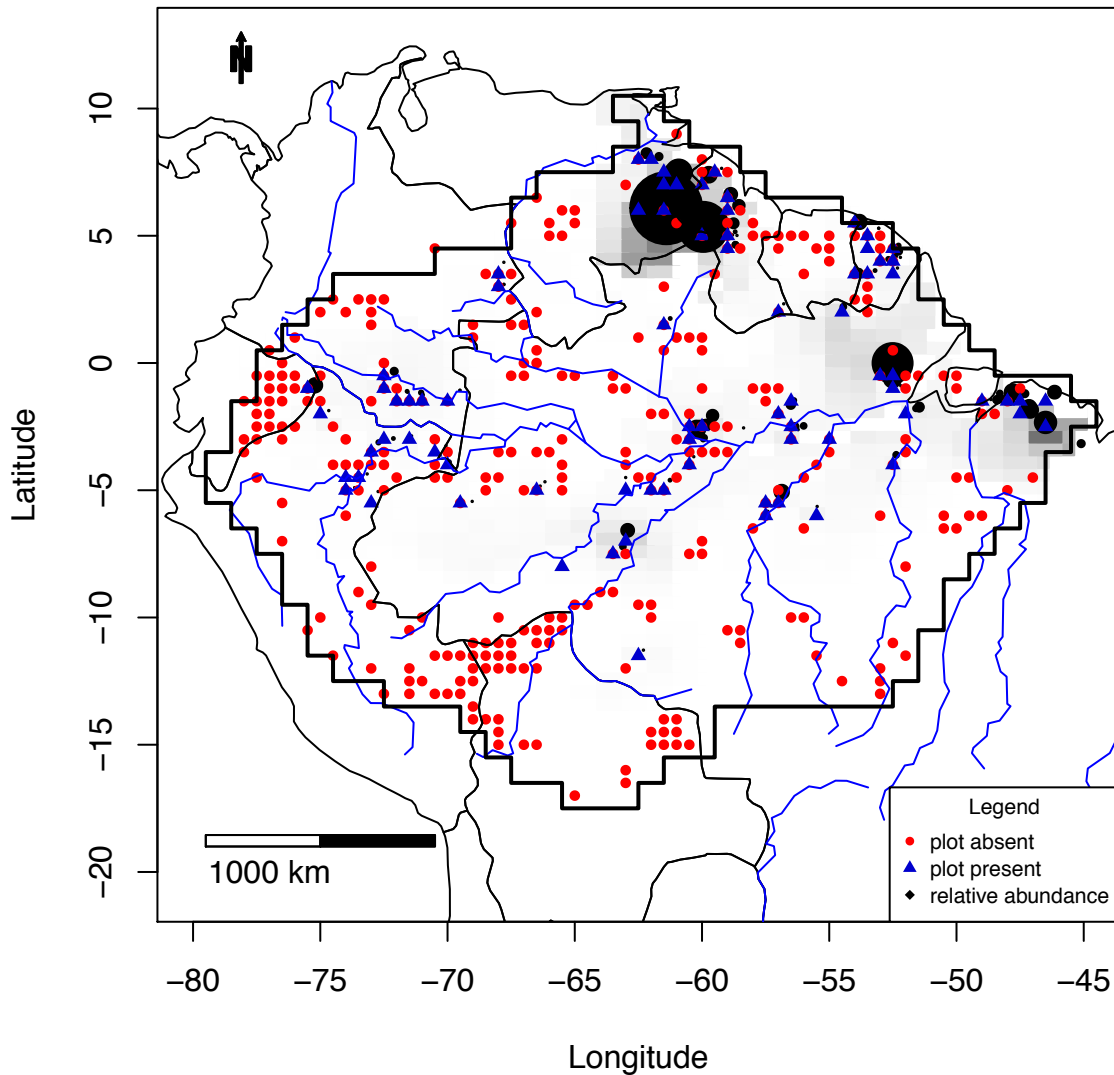

Figure S3\_129A Combined map of *Protium\_hebetatum*

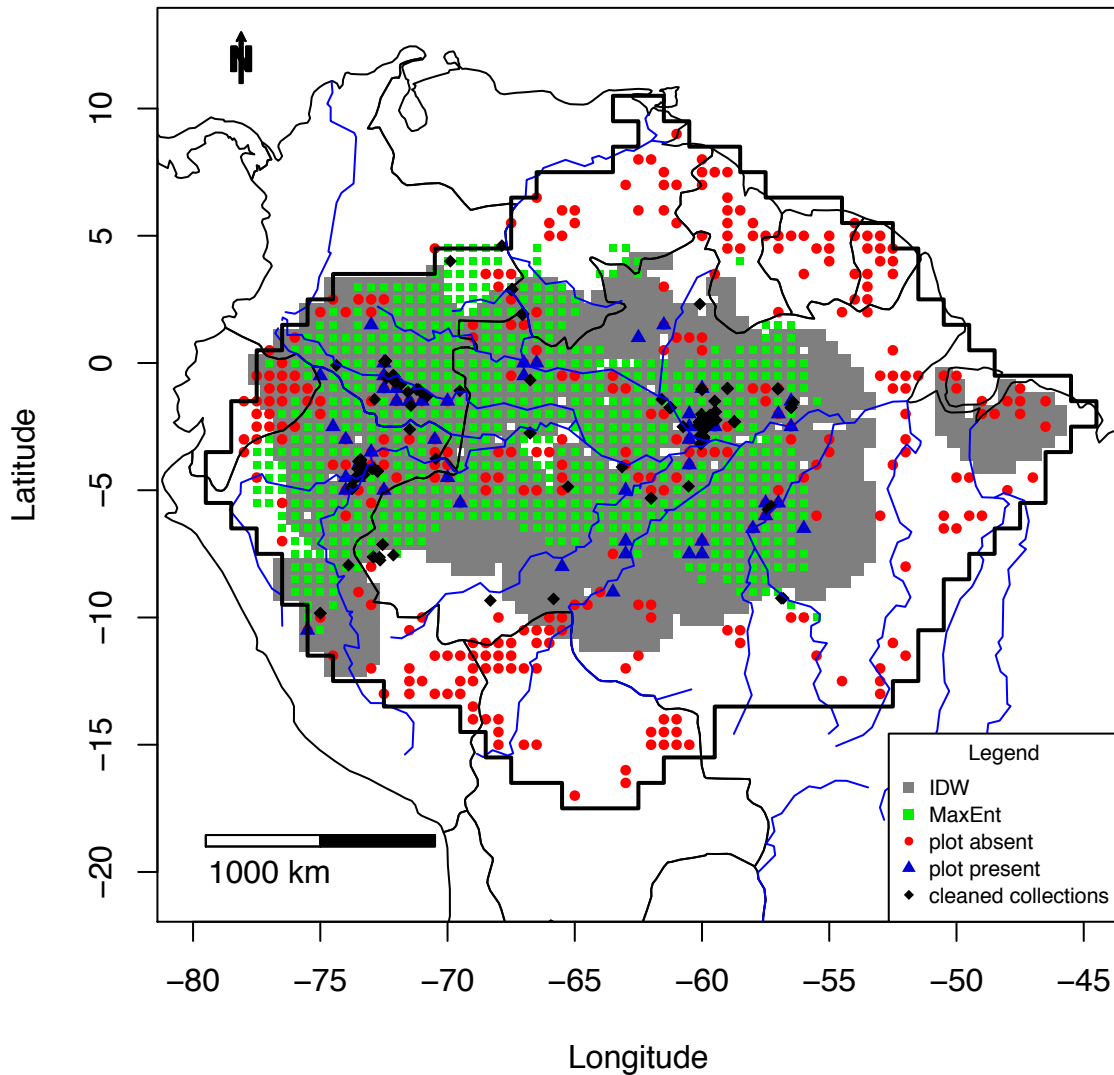

Figure S3\_129B MaxEnt map of *Protium\_hebetatum*

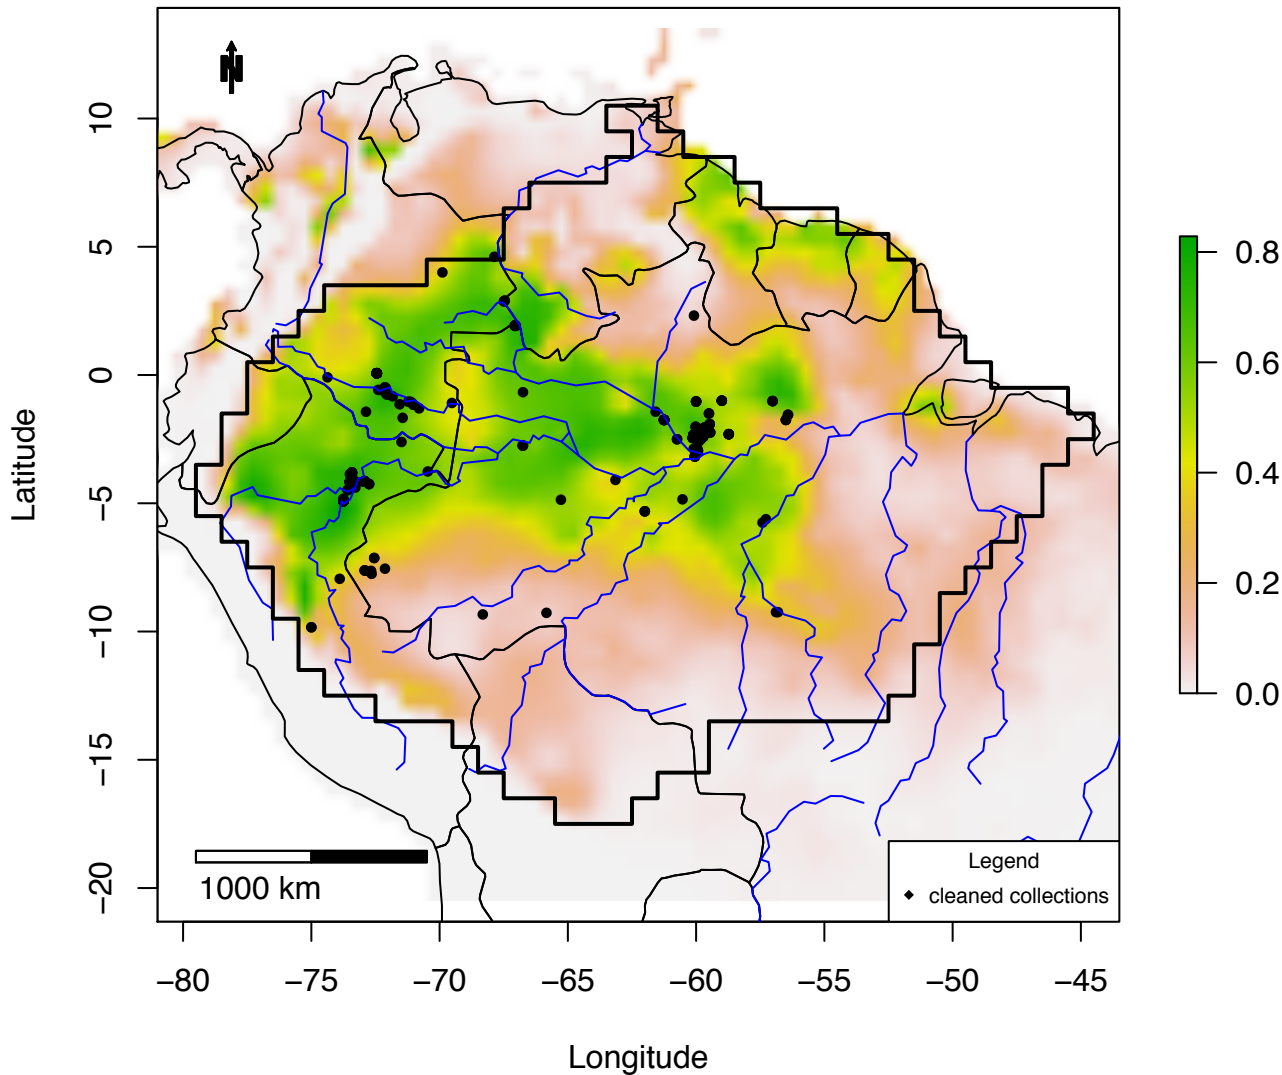

**Figure S3\_129C IDW map of *Protium\_hebetatum*:  
plots =0 – 0.14; IDW: 0 – 0.12**

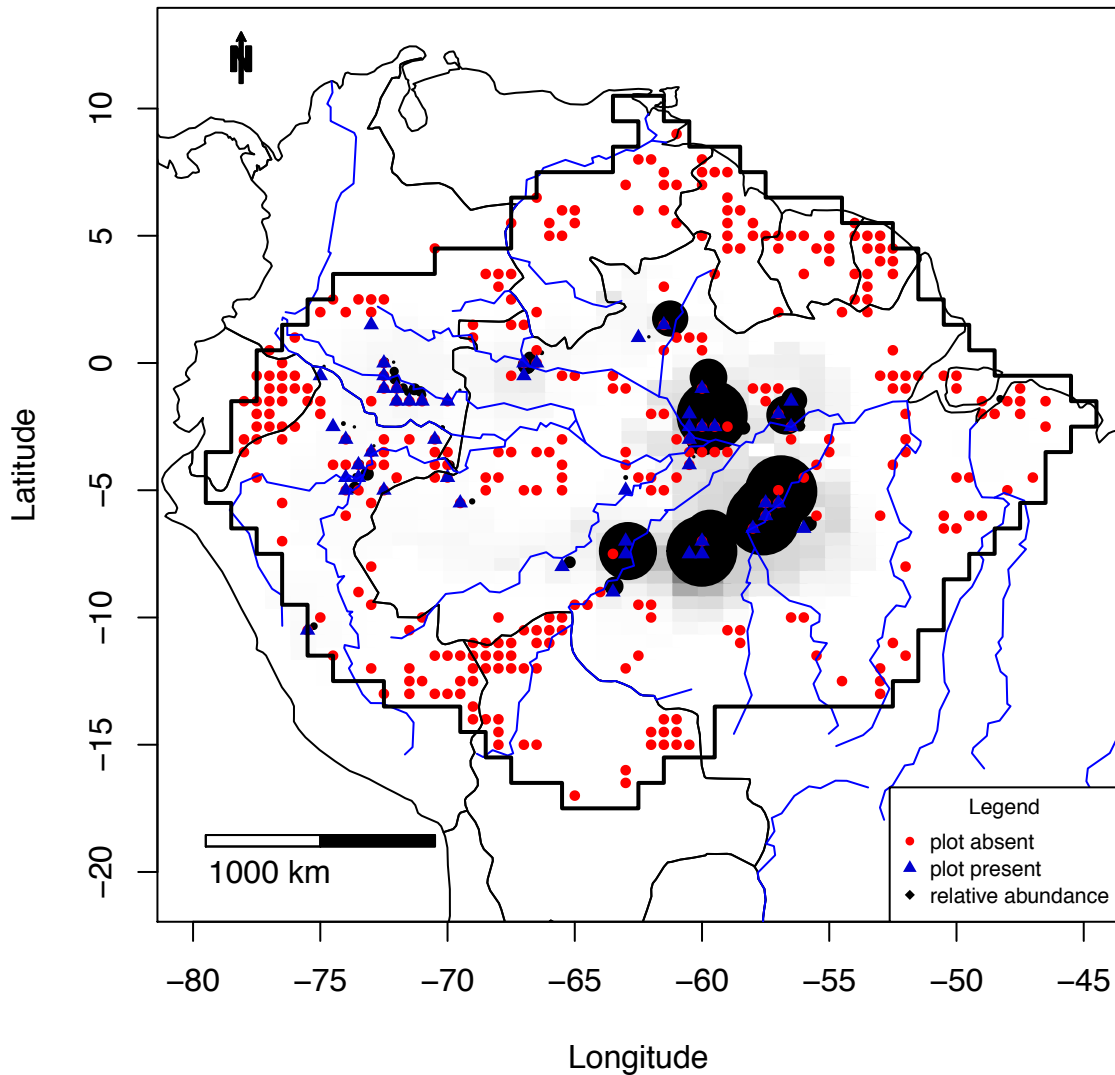

Figure S3\_130A Combined map of *Protium sagotianum*

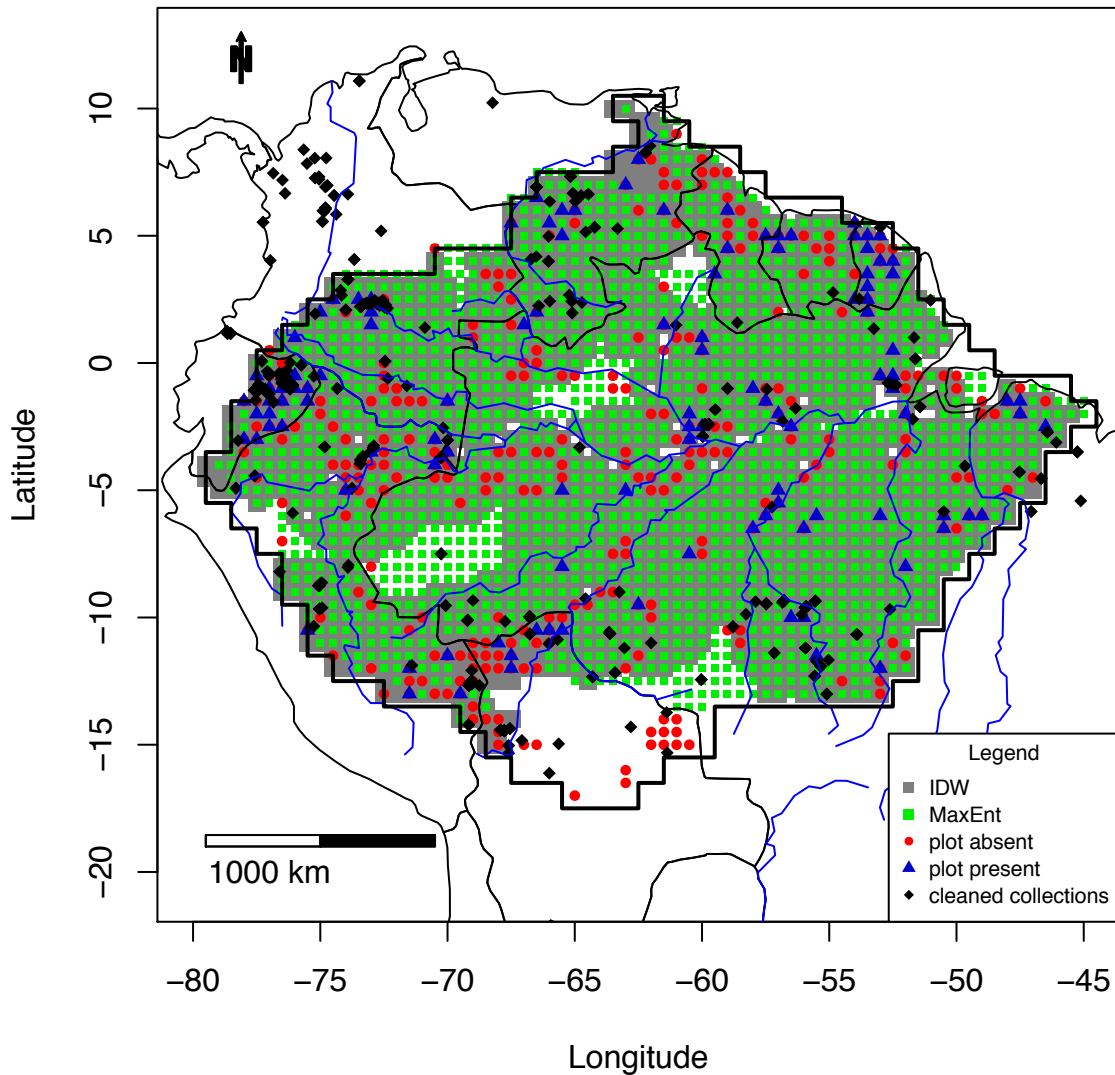

Figure S3\_130B MaxEnt map of *Protium\_sagotianum*

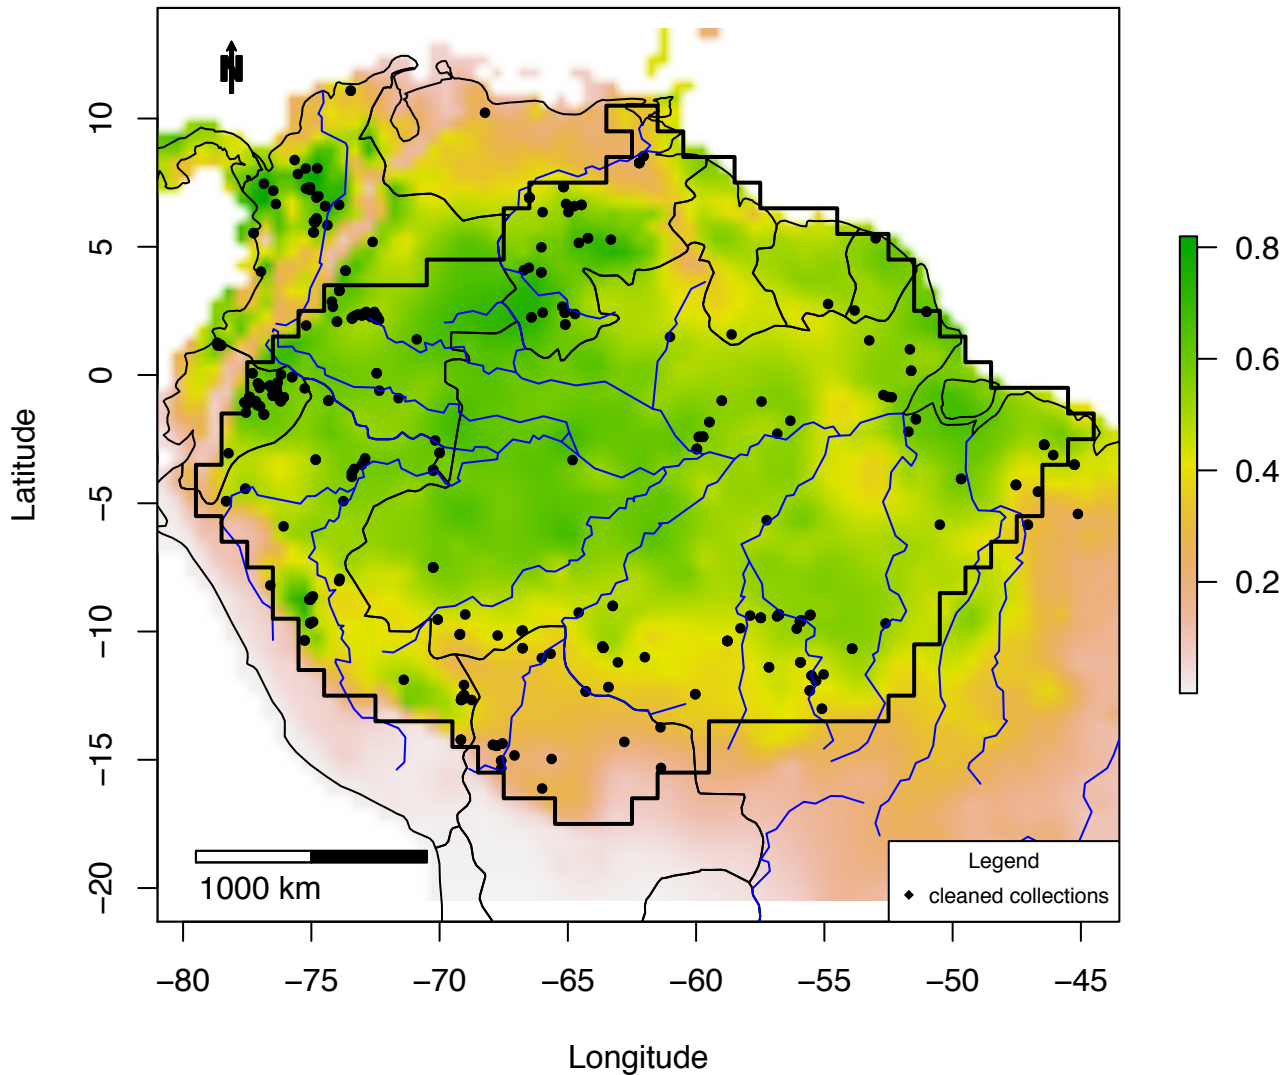

Figure S3\_130C IDW map of *Protium\_sagotianum*:  
plots =0 – 0.16; IDW: 0 – 0.16

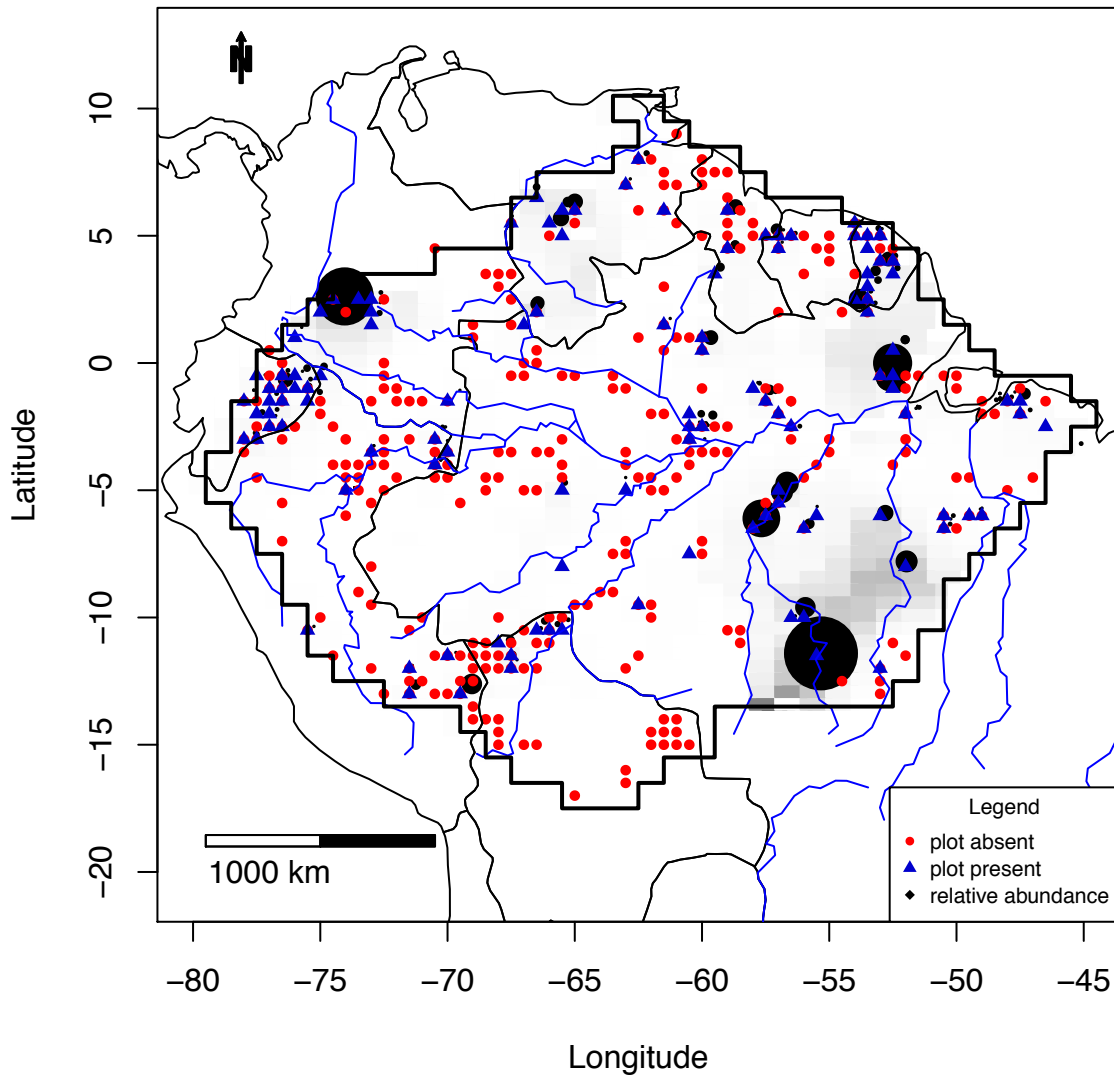

Figure S3\_131A Combined map of *Protium tenuifolium*

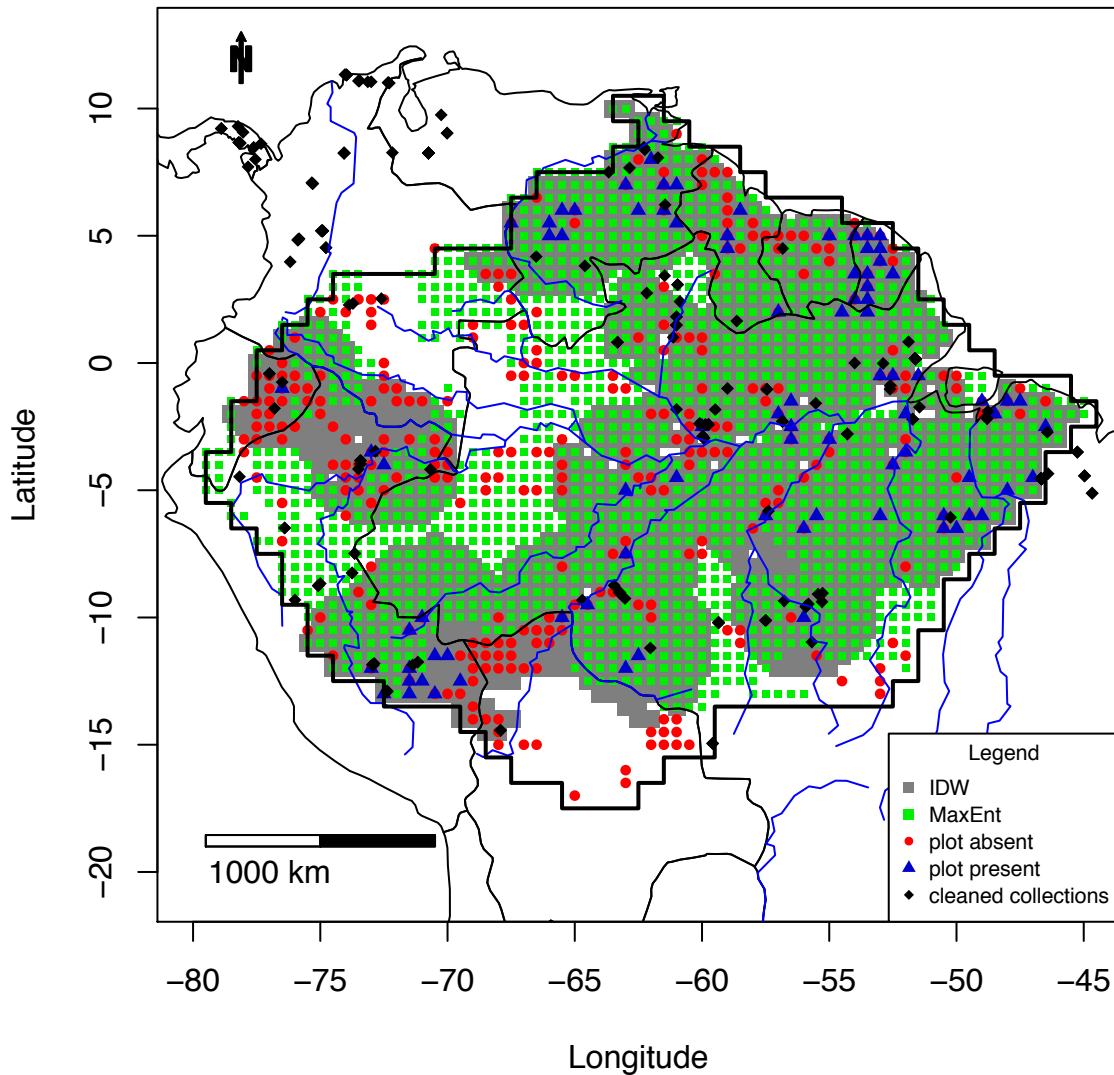



Figure S3\_131B MaxEnt map of *Protium\_tenuifolium*

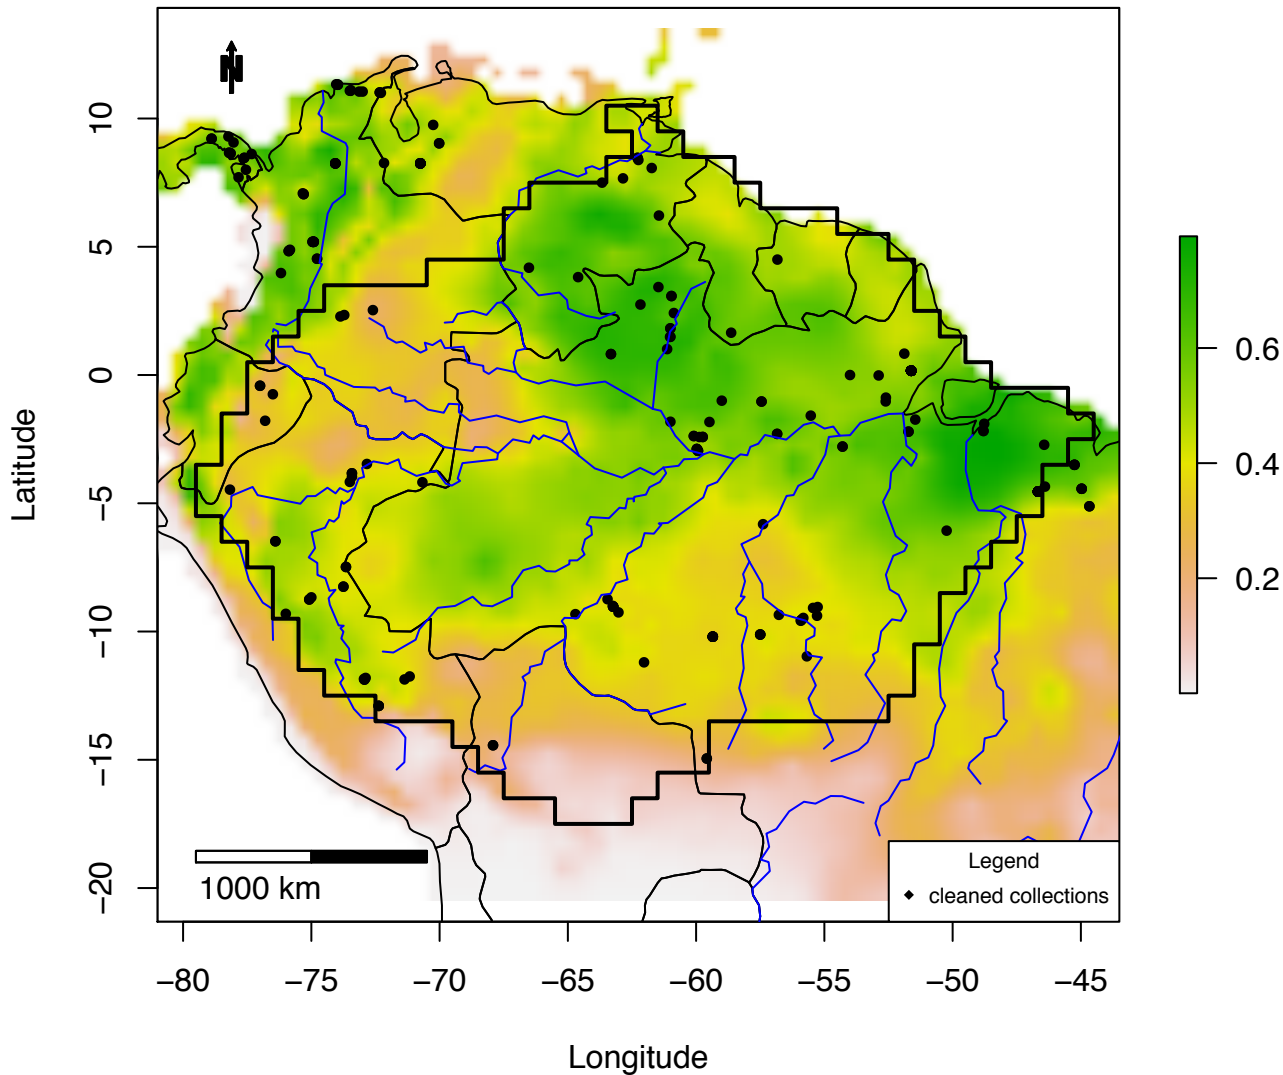

Figure S3\_131C IDW map of *Protium tenuifolium*:  
plots =0 – 0.06; IDW: 0 – 0.04

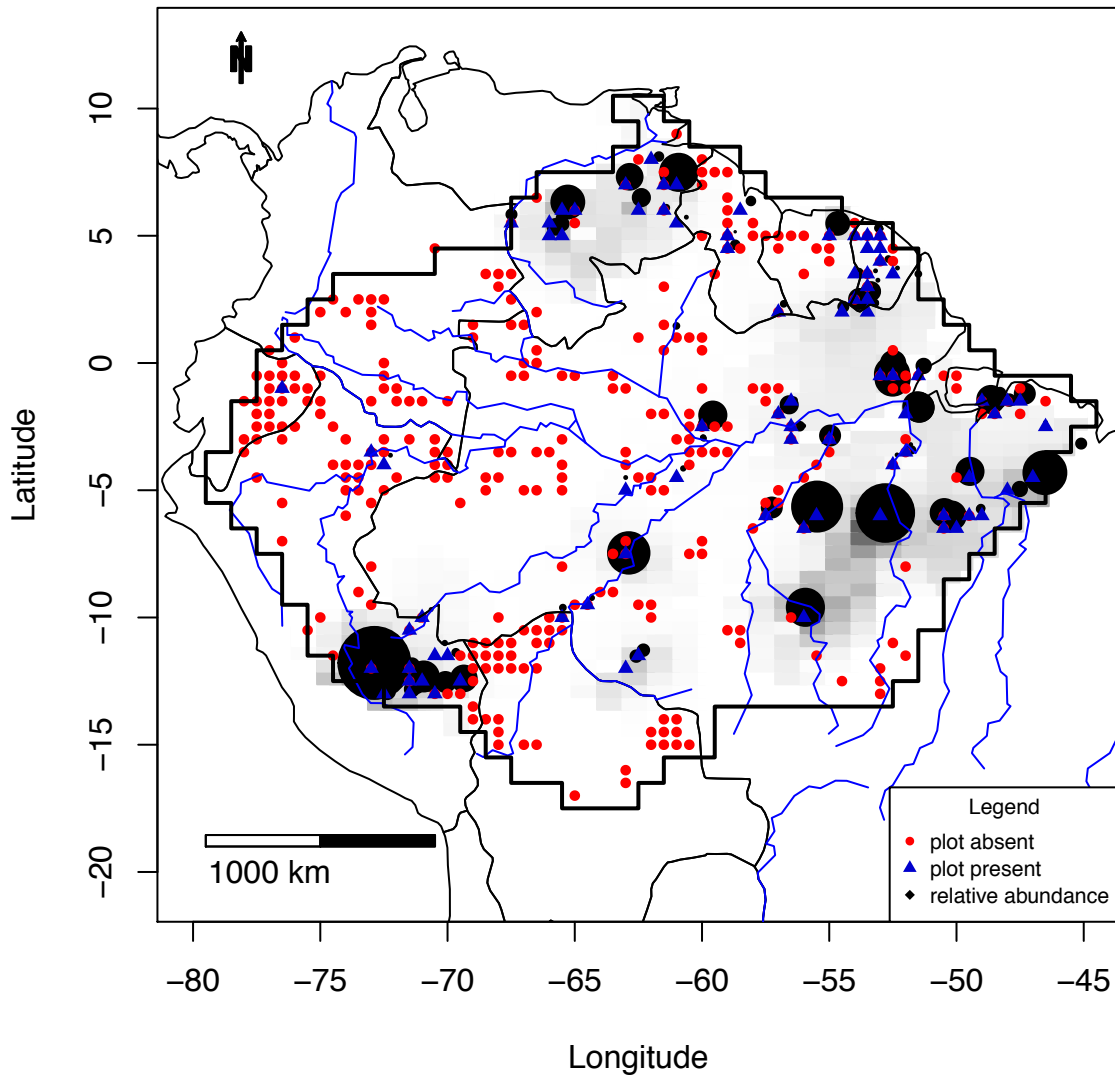

Figure S3\_132A Combined map of *Protium\_trifoliolatum*

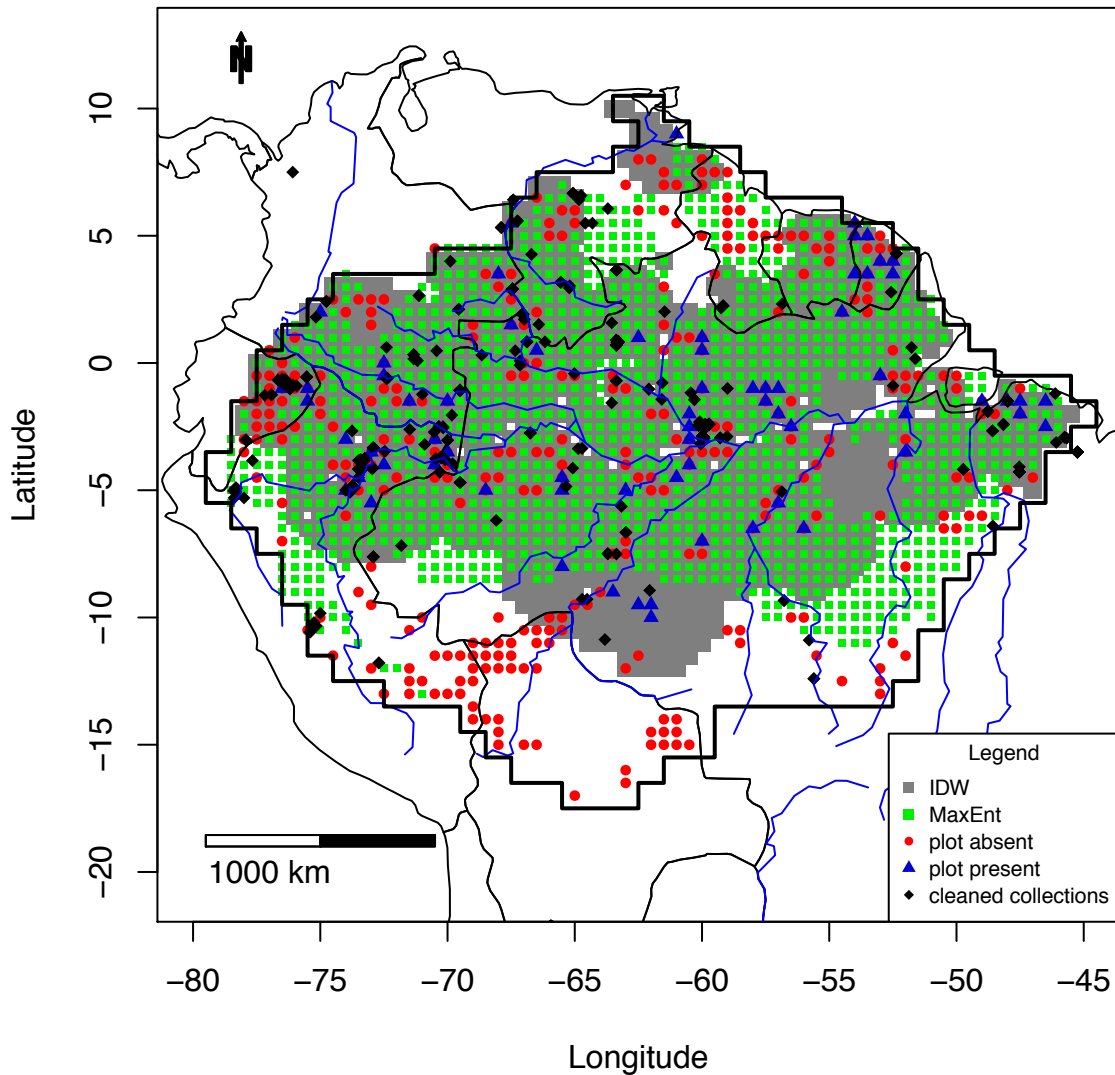

Figure S3\_132B MaxEnt map of *Protium\_trifoliolatum*

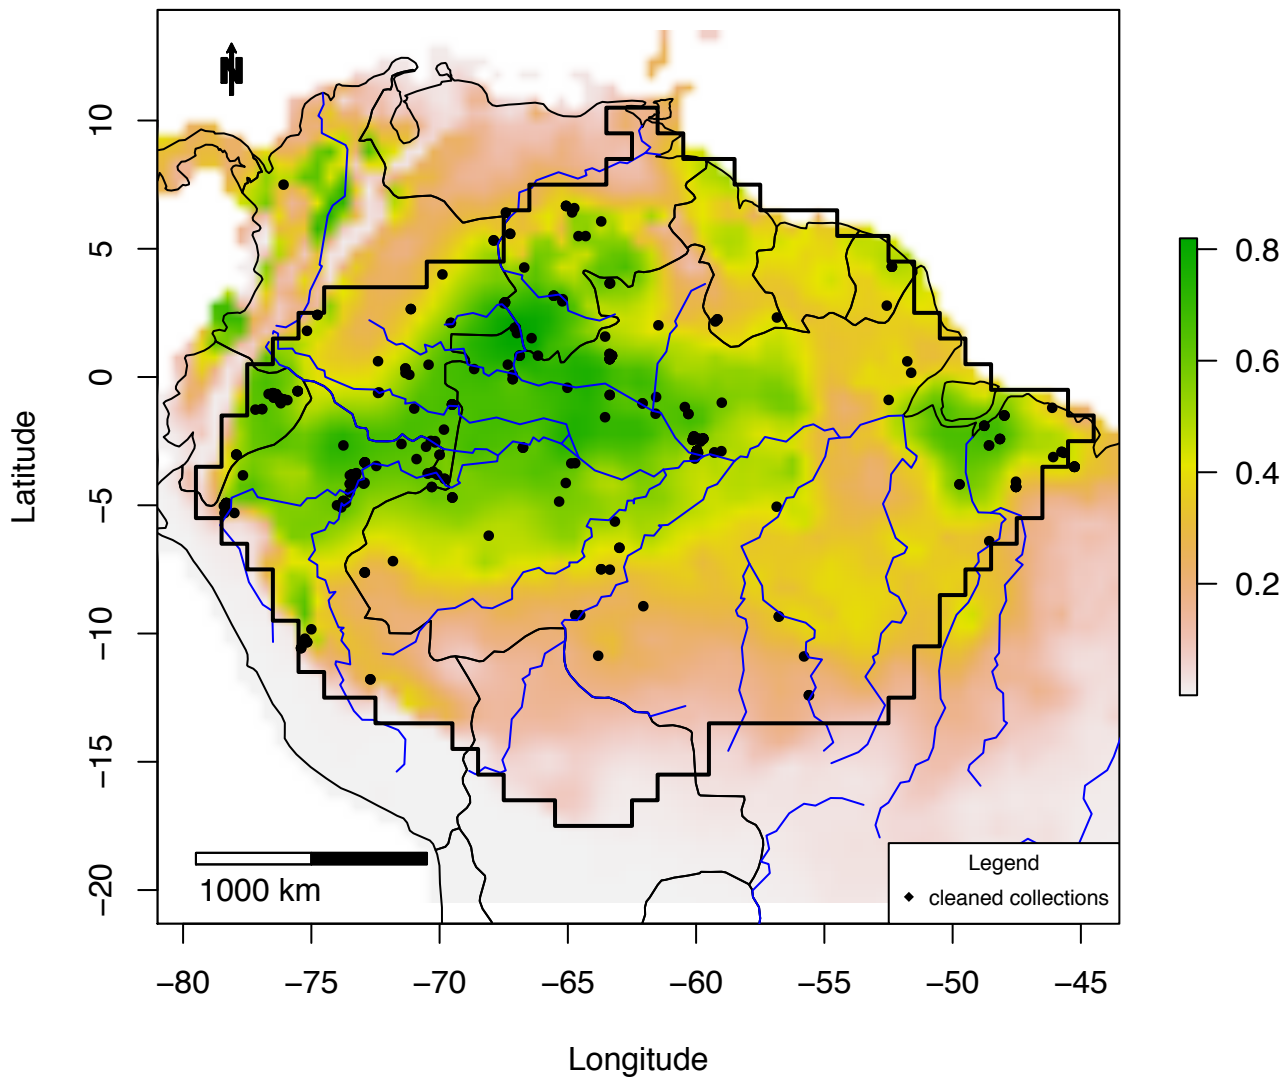

Figure S3\_132C IDW map of *Protium\_trifoliolatum*:  
plots =0 – 0.12; IDW: 0 – 0.04

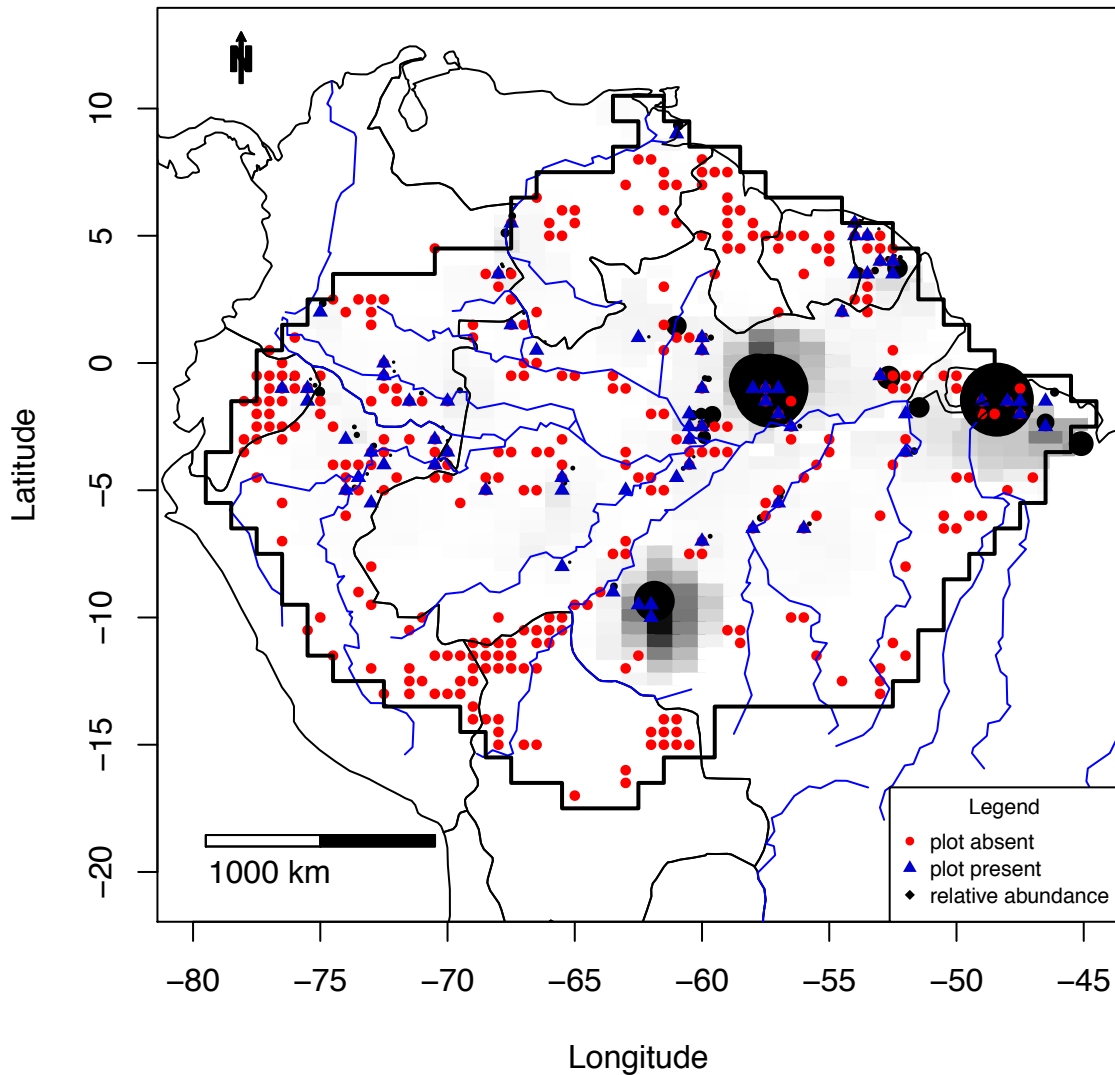

Figure S3\_133A Combined map of *Pseudobombax\_munguba*

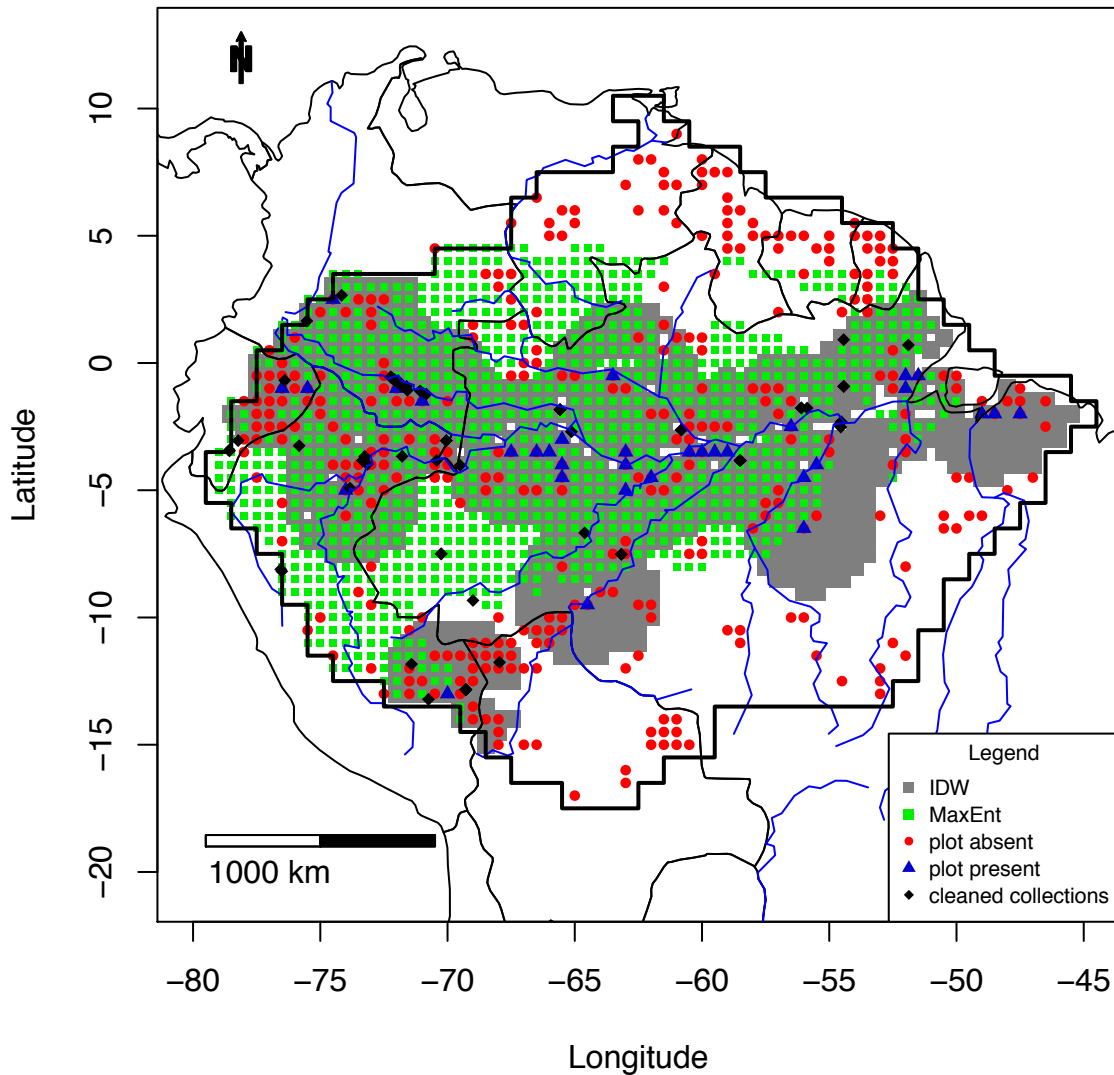

Figure S3\_133B MaxEnt map of *Pseudobombax\_munguba*

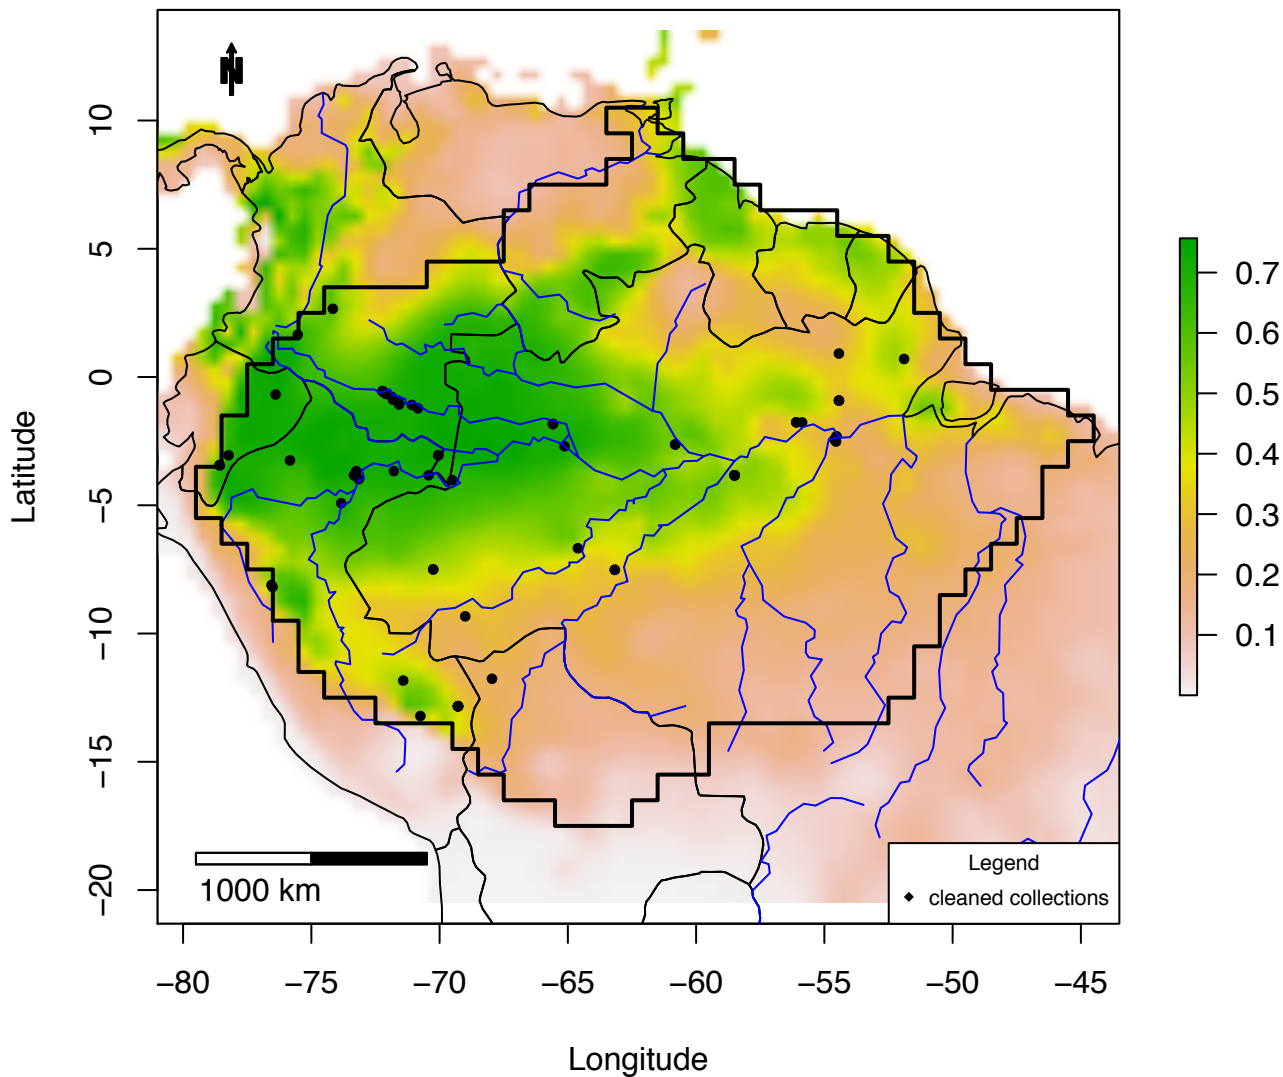

**Figure S3\_133C IDW map of *Pseudobombax munguba*:  
plots =0 – 0.35; IDW: 0 – 0.06**

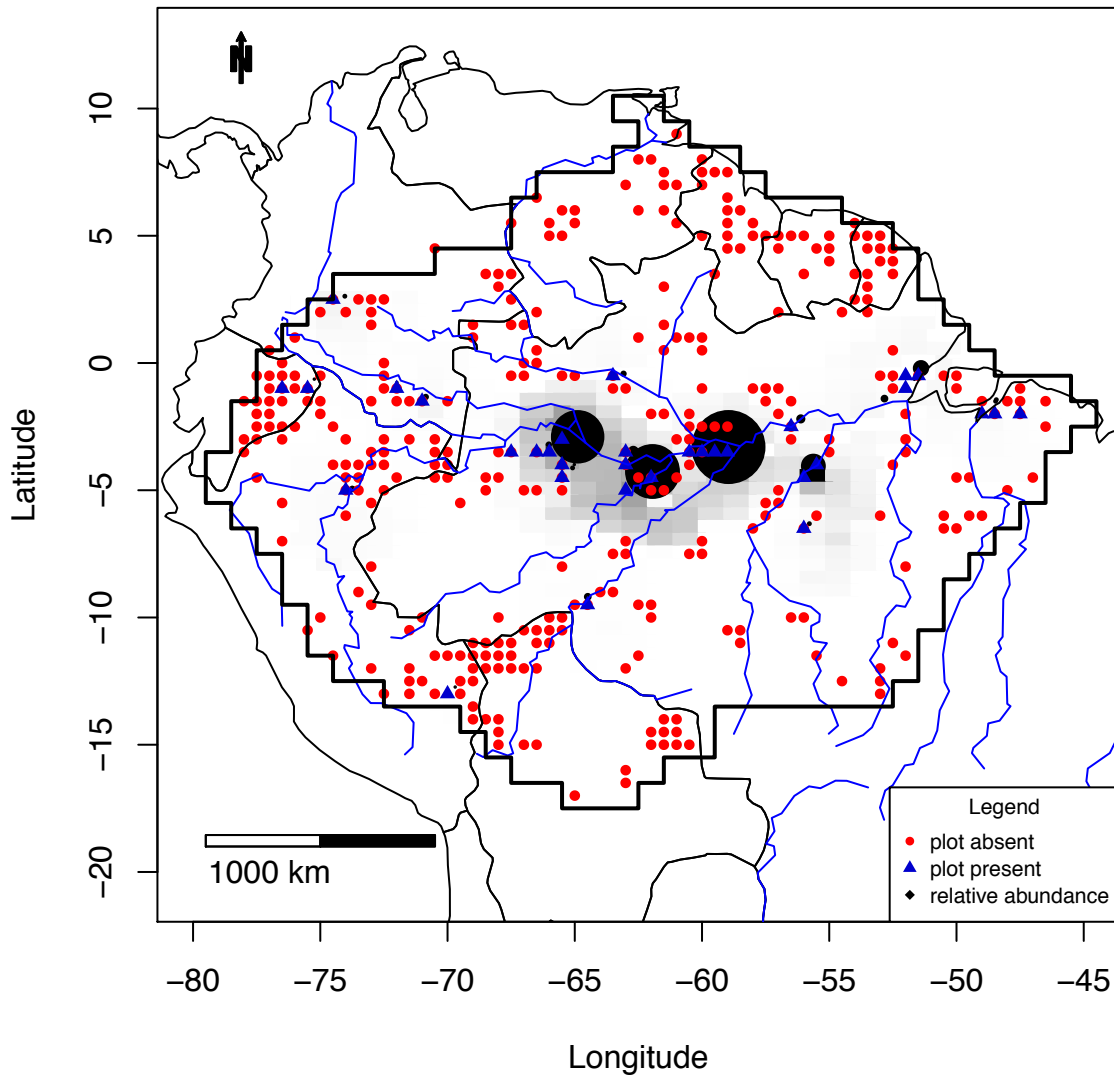



Figure S3\_134A Combined map of *Pseudolmedia\_laevigata*

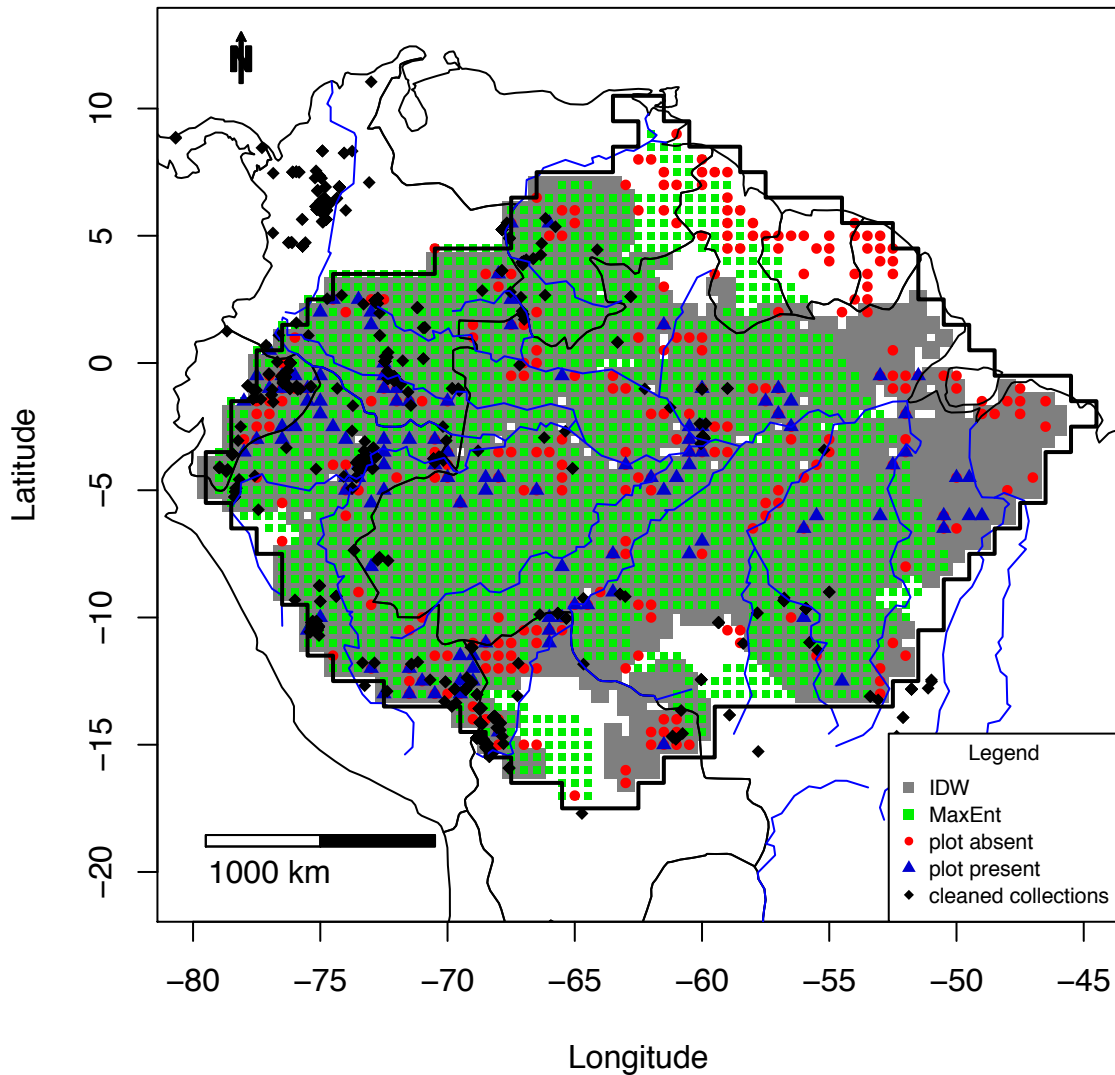

Figure S3\_134B MaxEnt map of *Pseudolmedia\_laevigata*

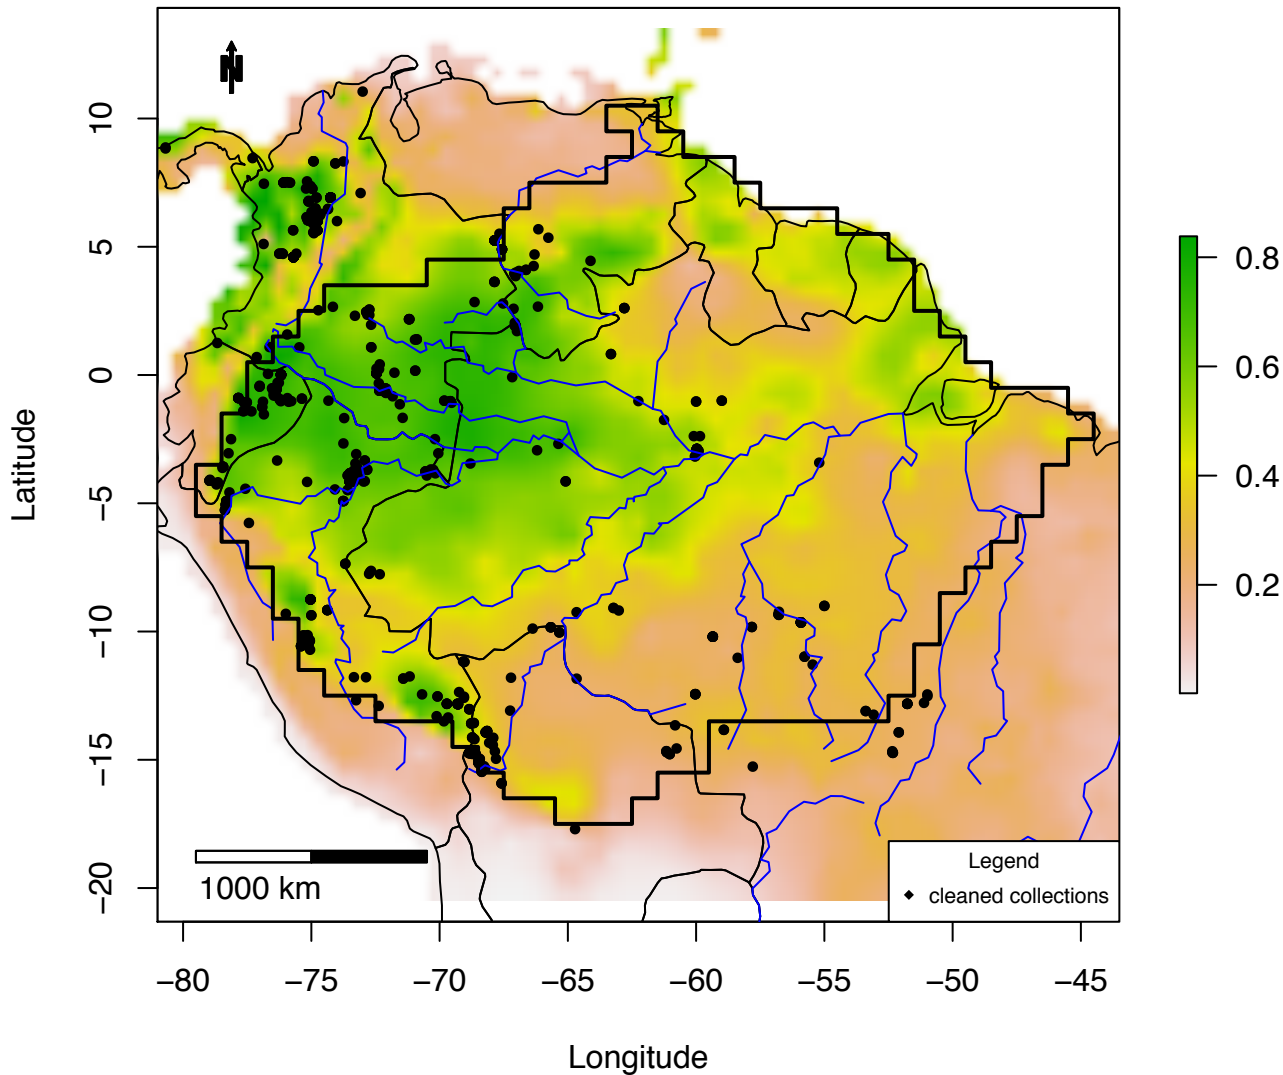

Figure S3\_134C IDW map of *Pseudolmedia\_laevigata*:  
plots =0 – 0.12; IDW: 0 – 0.07

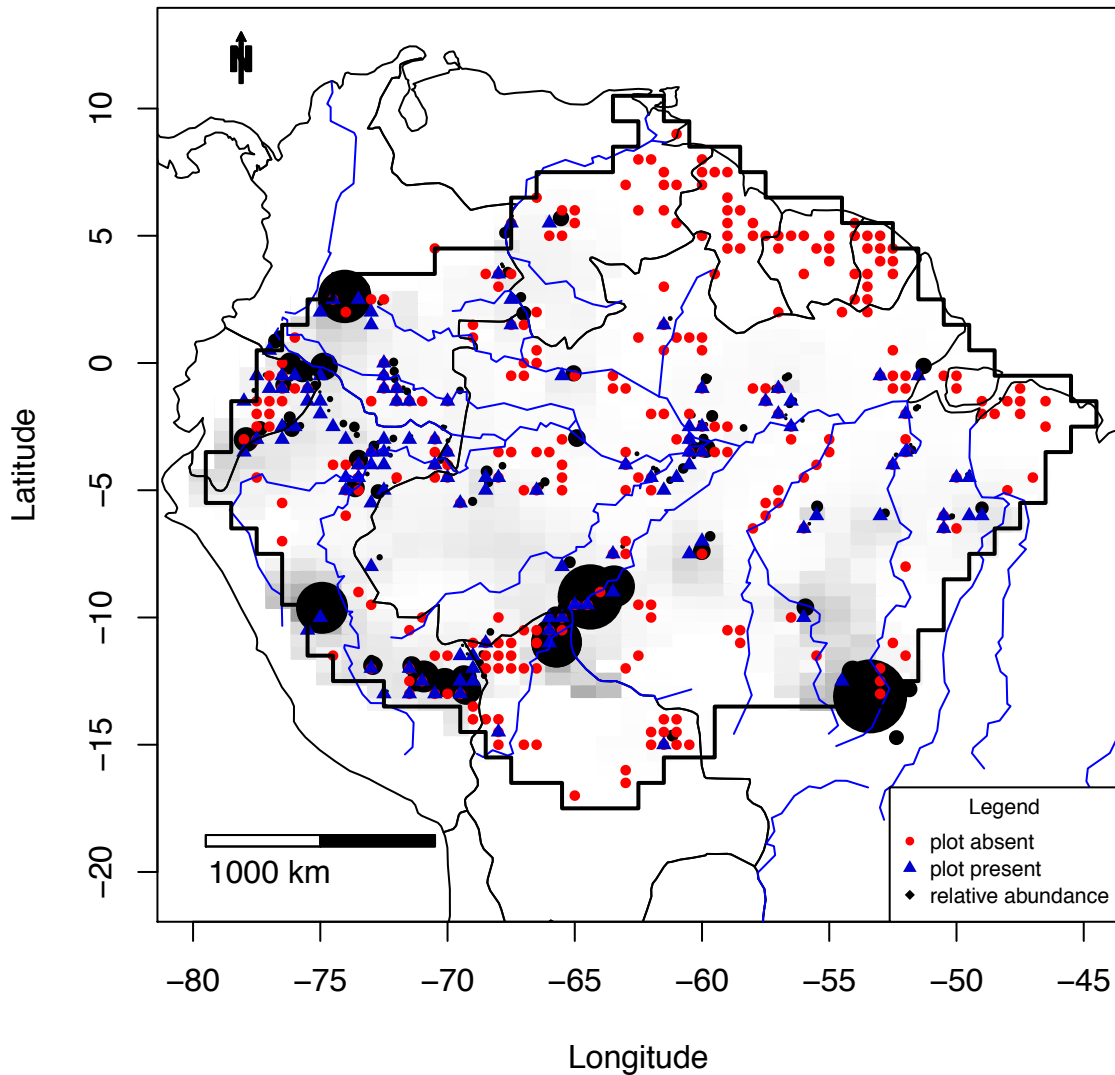

Figure S3\_135A Combined map of *Pseudolmedia\_laevis*

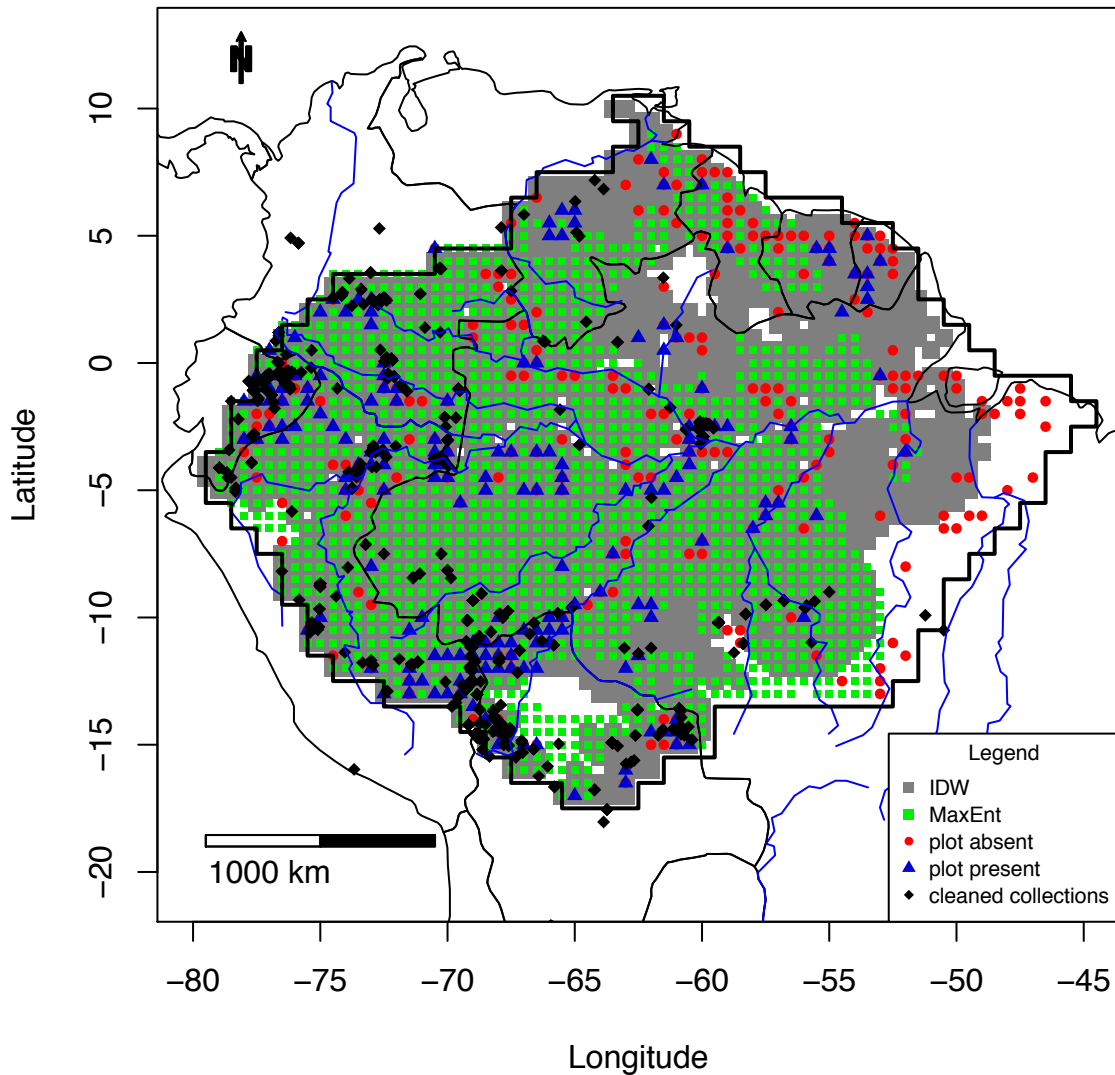

Figure S3\_135B MaxEnt map of *Pseudolmedia\_laevis*

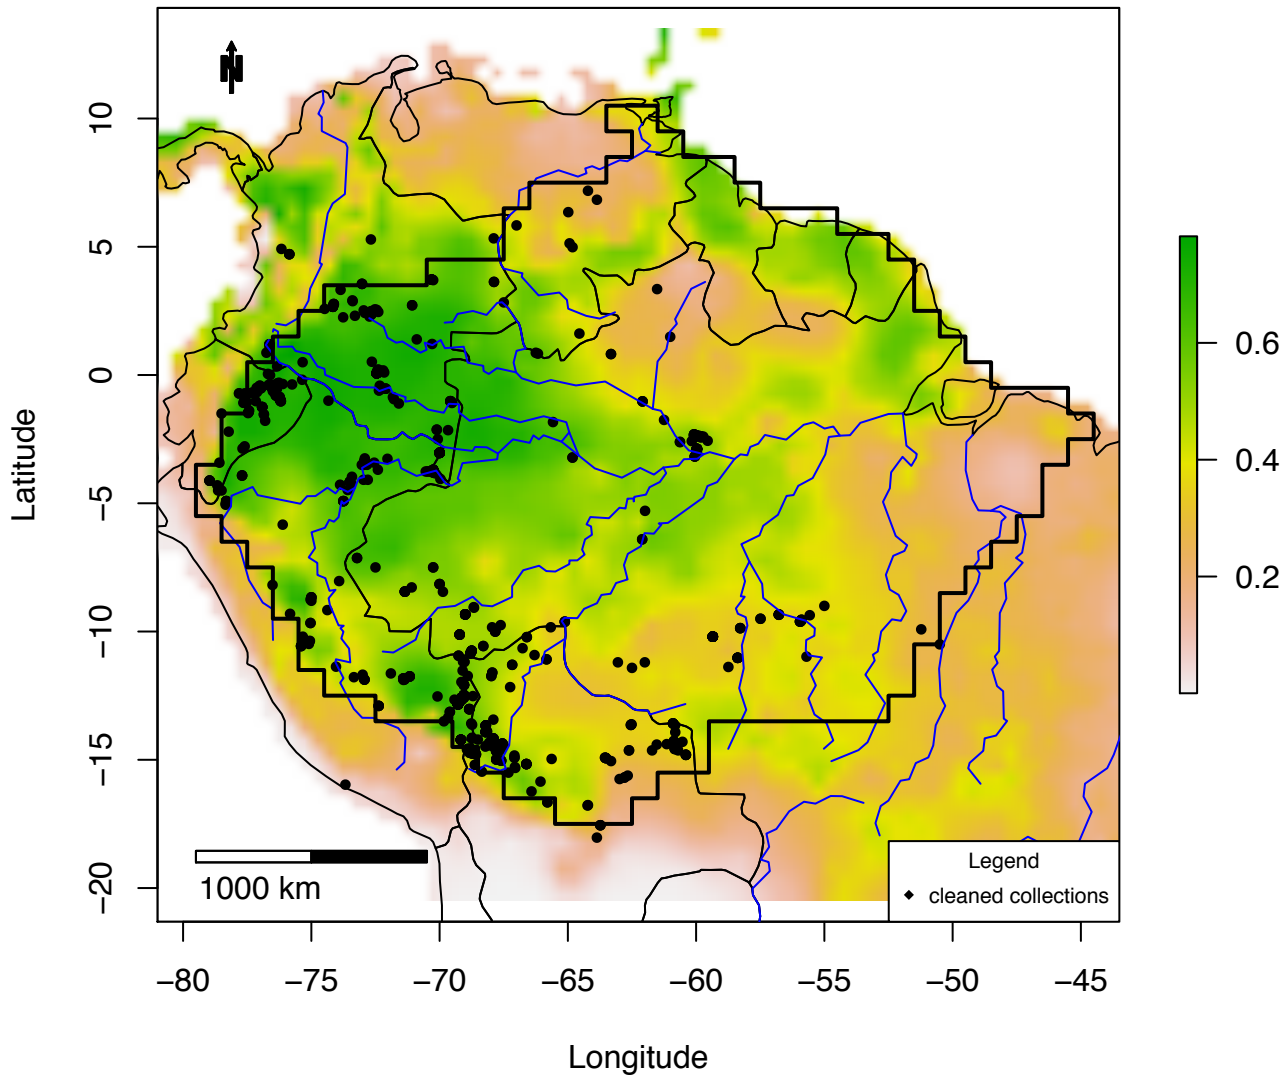

Figure S3\_135C IDW map of *Pseudolmedia\_laevis*:  
plots =0 – 0.36; IDW: 0 – 0.24

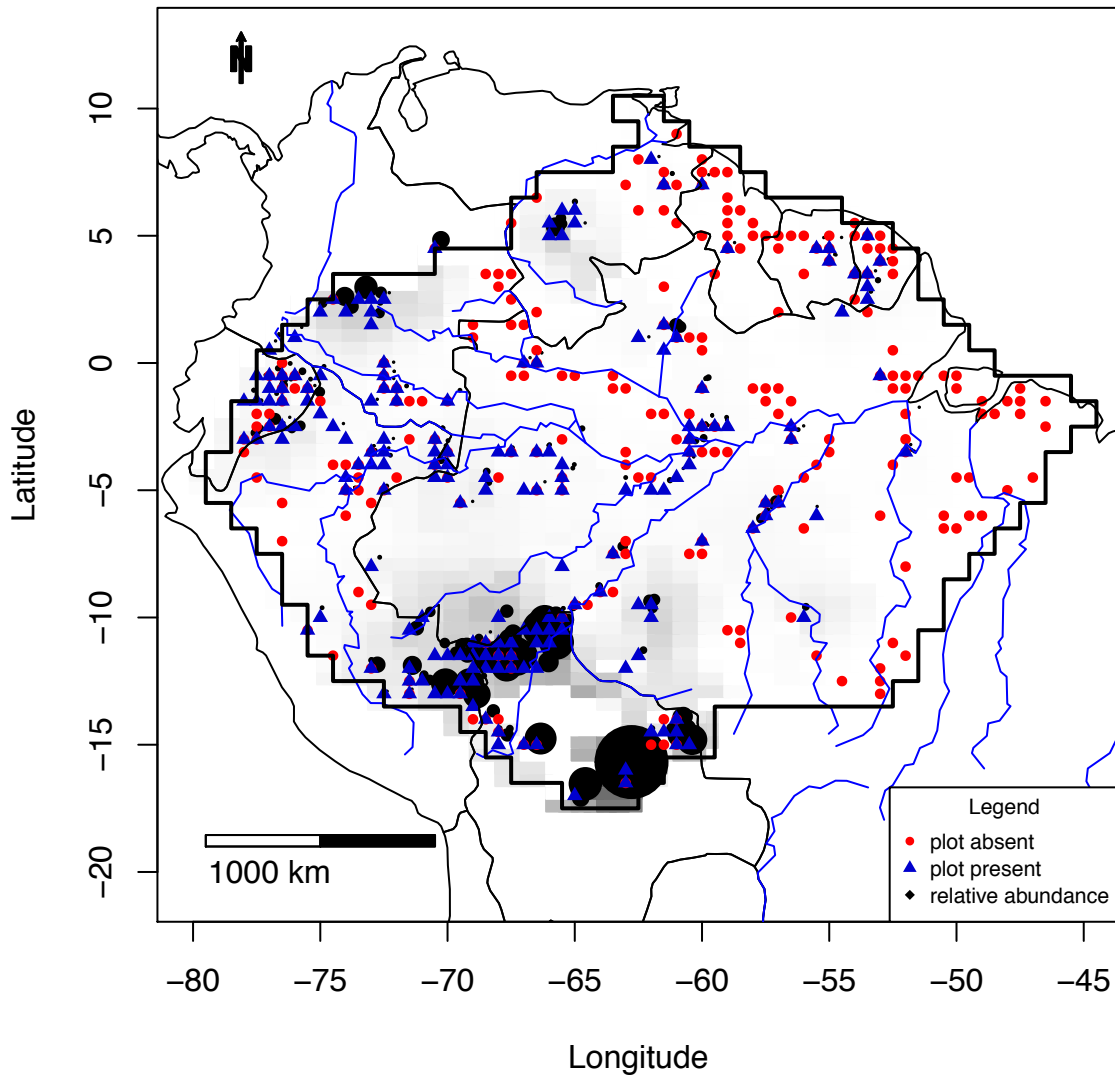

Figure S3\_136A Combined map of *Pseudopiptadenia suaveolens*

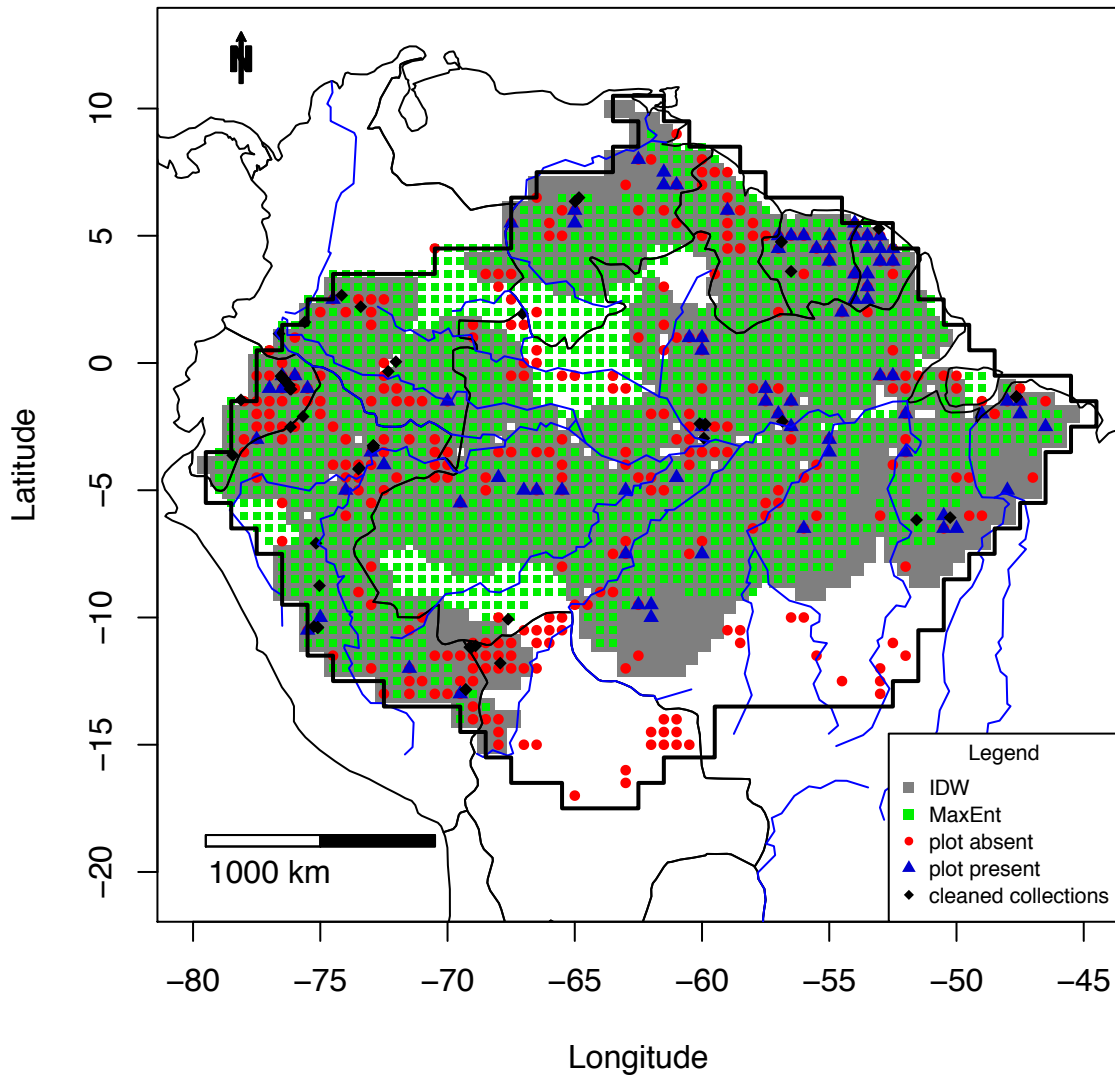

Figure S3\_136B MaxEnt map of *Pseudopiptadenia\_suaveolens*

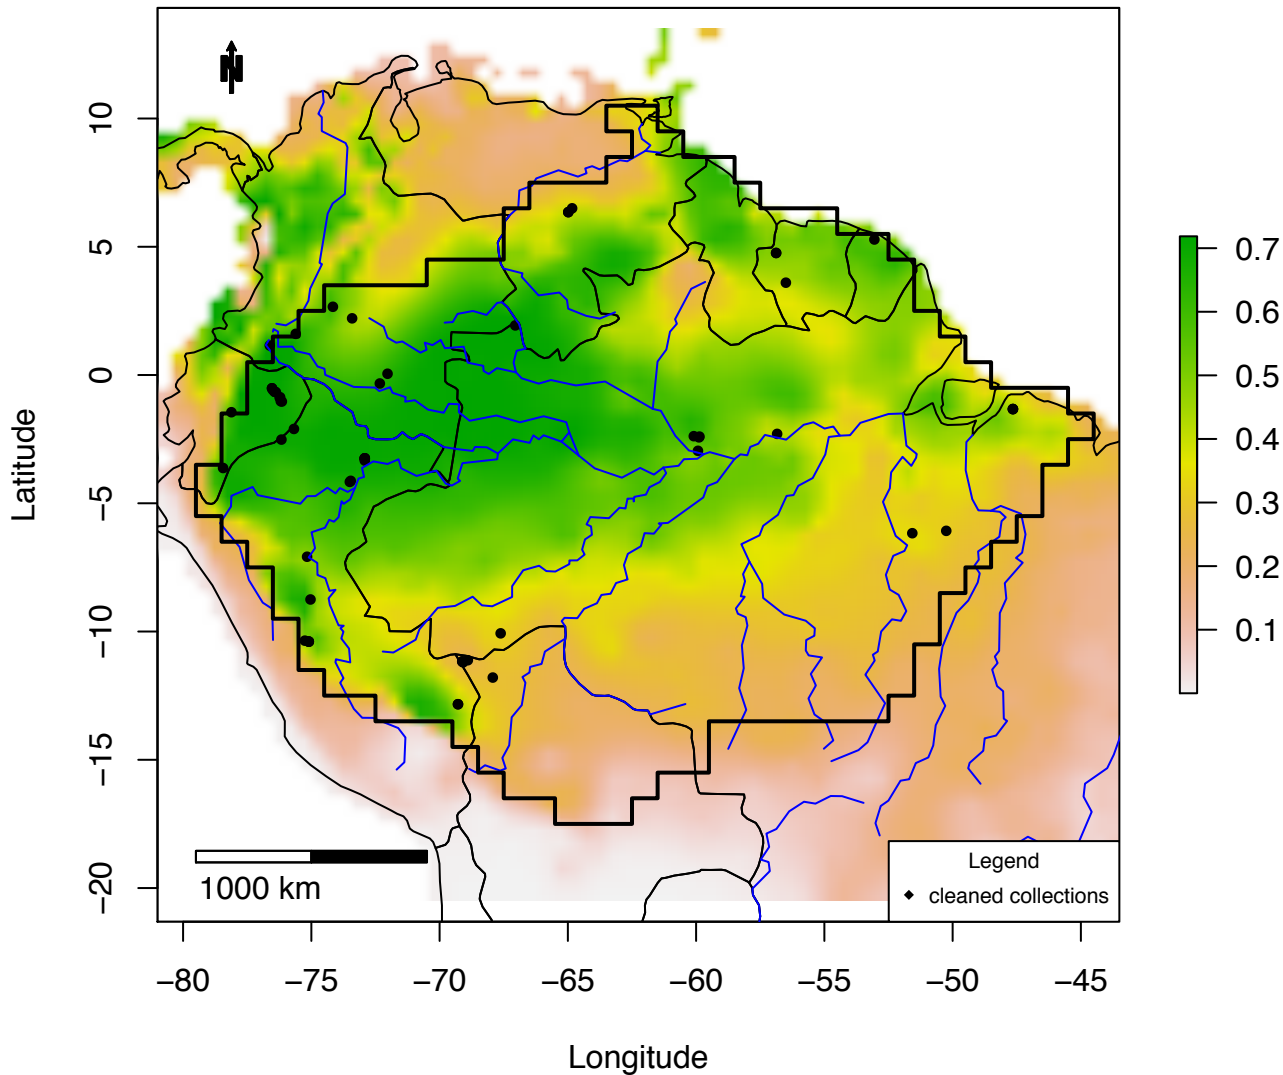



Figure S3\_136C IDW map of *Pseudopiptadenia\_suaveolens*:  
plots =0 – 0.03; IDW: 0 – 0.01

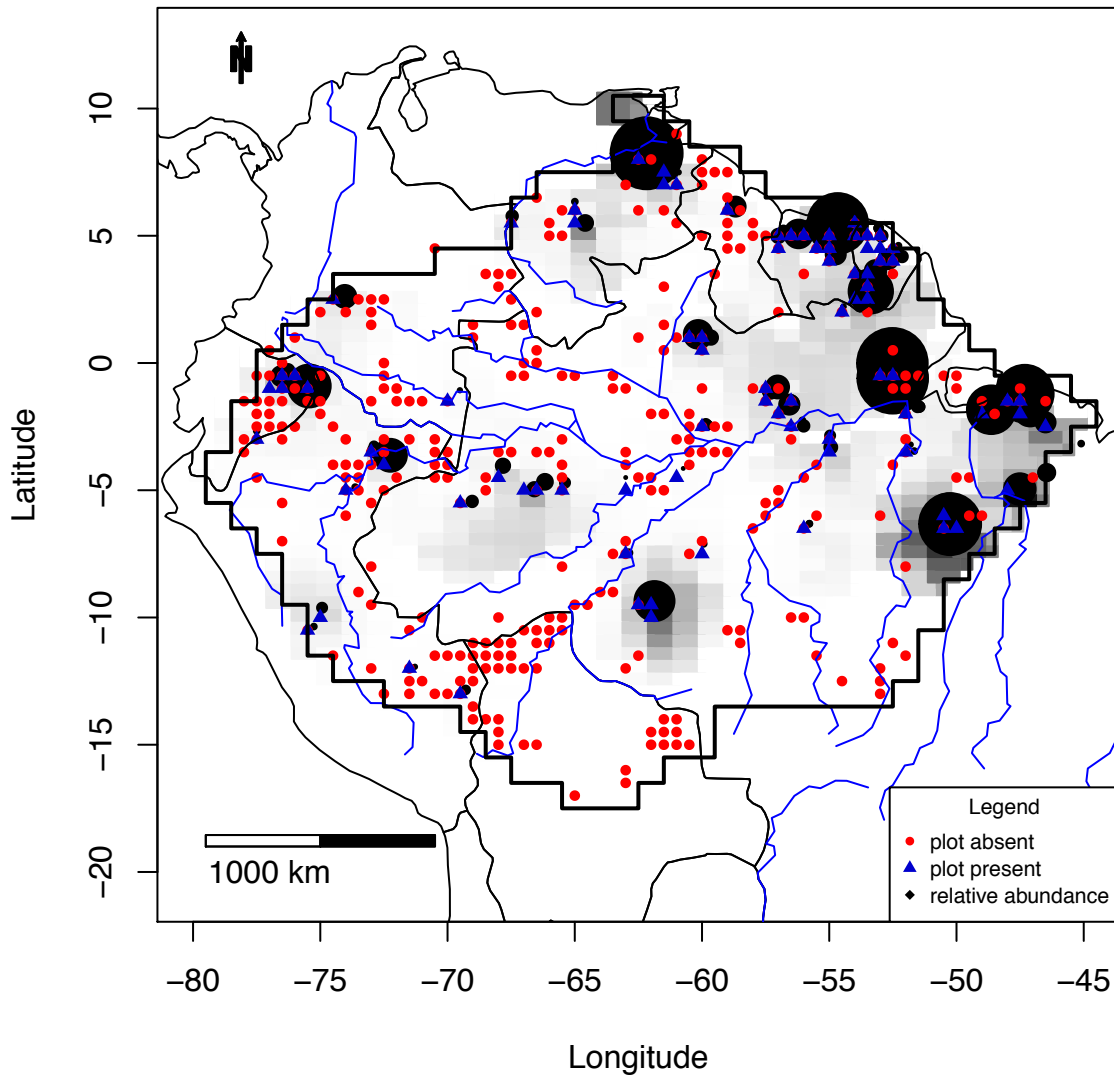

Figure S3\_137A Combined map of *Pterocarpus\_amazonum*

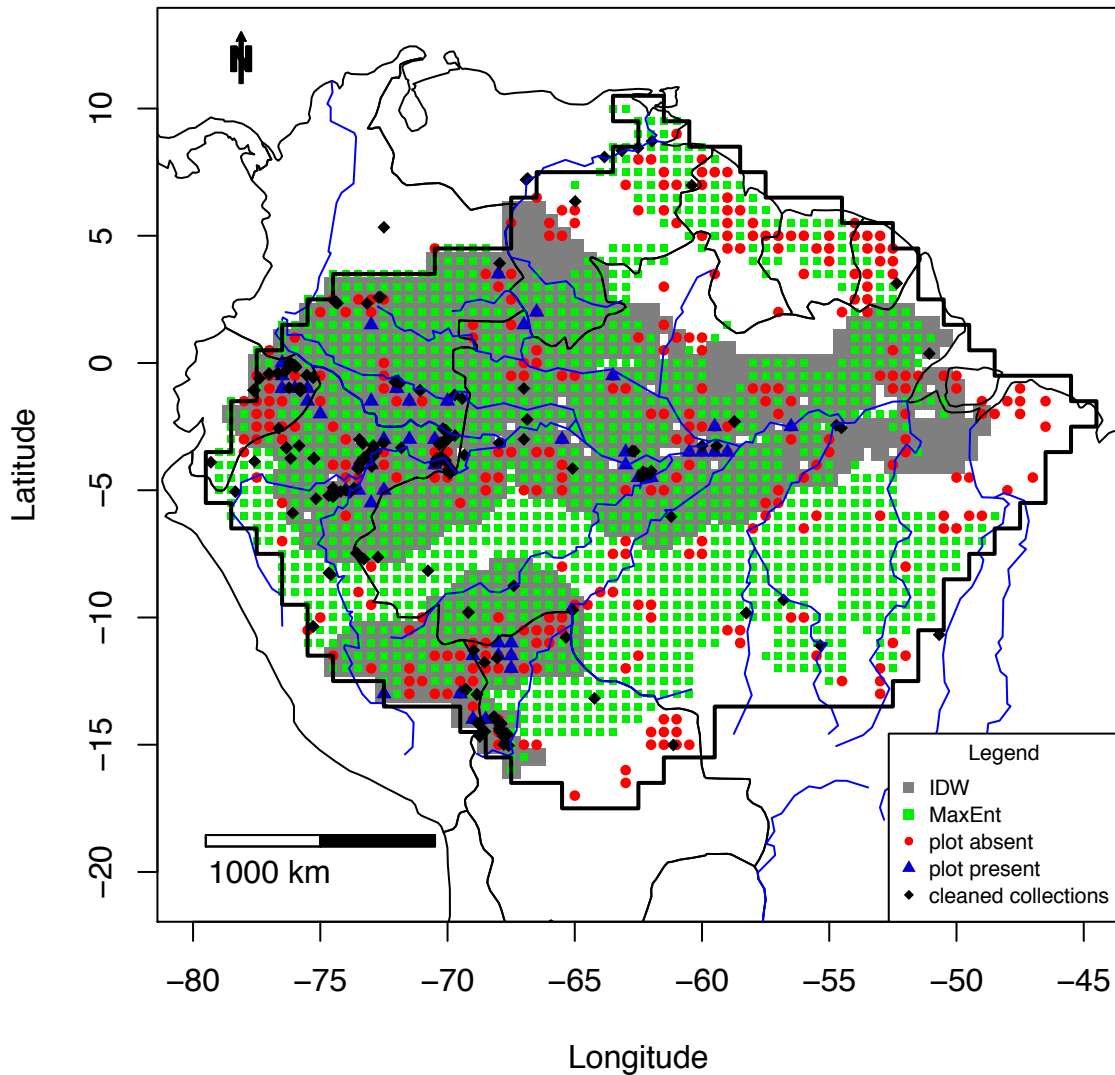

Figure S3\_137B MaxEnt map of *Pterocarpus amazonum*

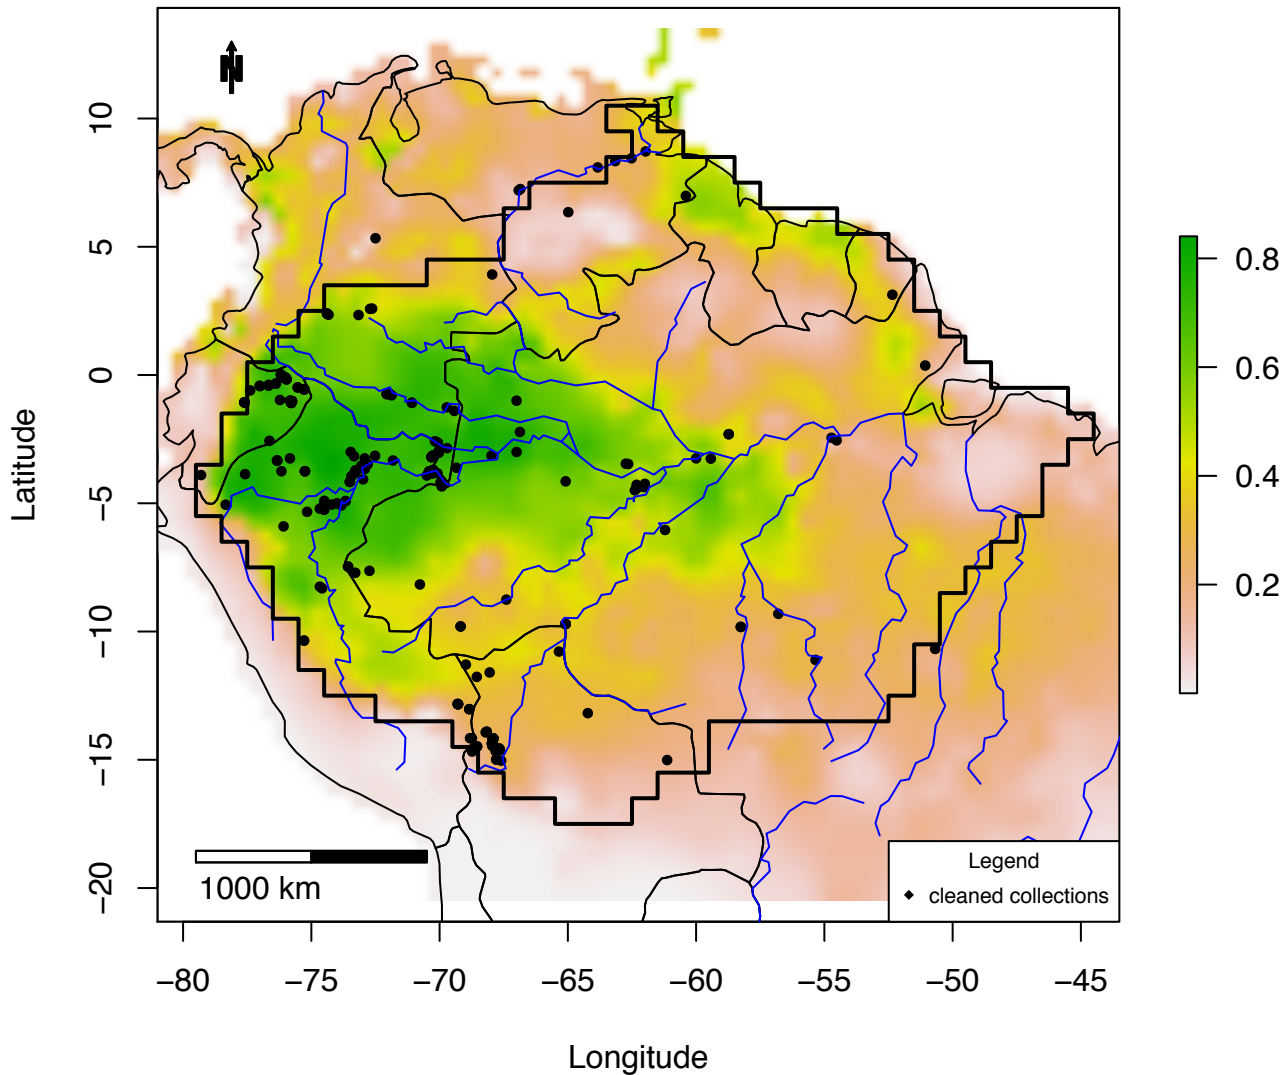

Figure S3\_137C IDW map of *Pterocarpus amazonum*:  
plots =0 – 0.22; IDW: 0 – 0.03

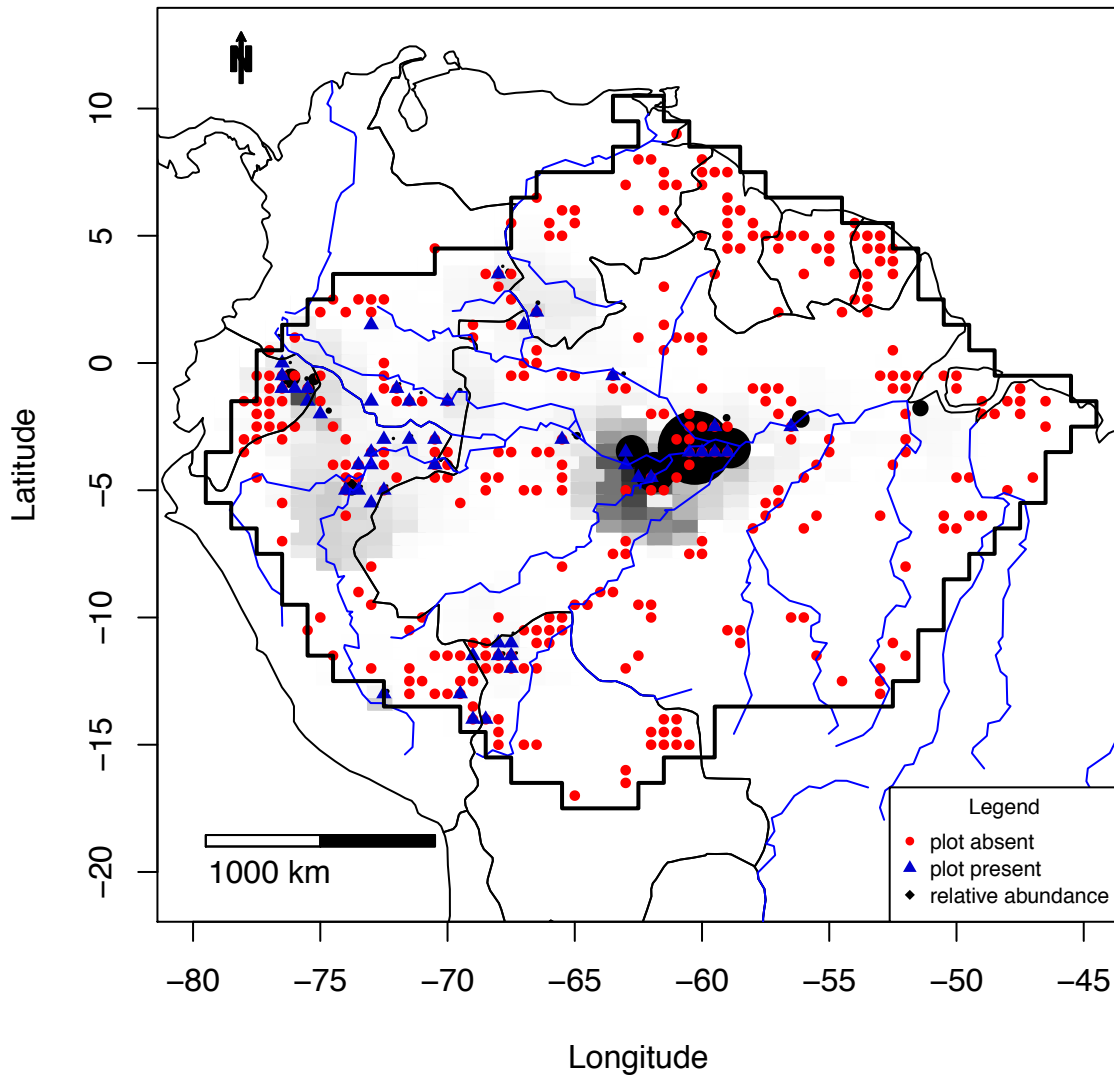

Figure S3\_138A Combined map of *Pterocarpus\_santalinoides*

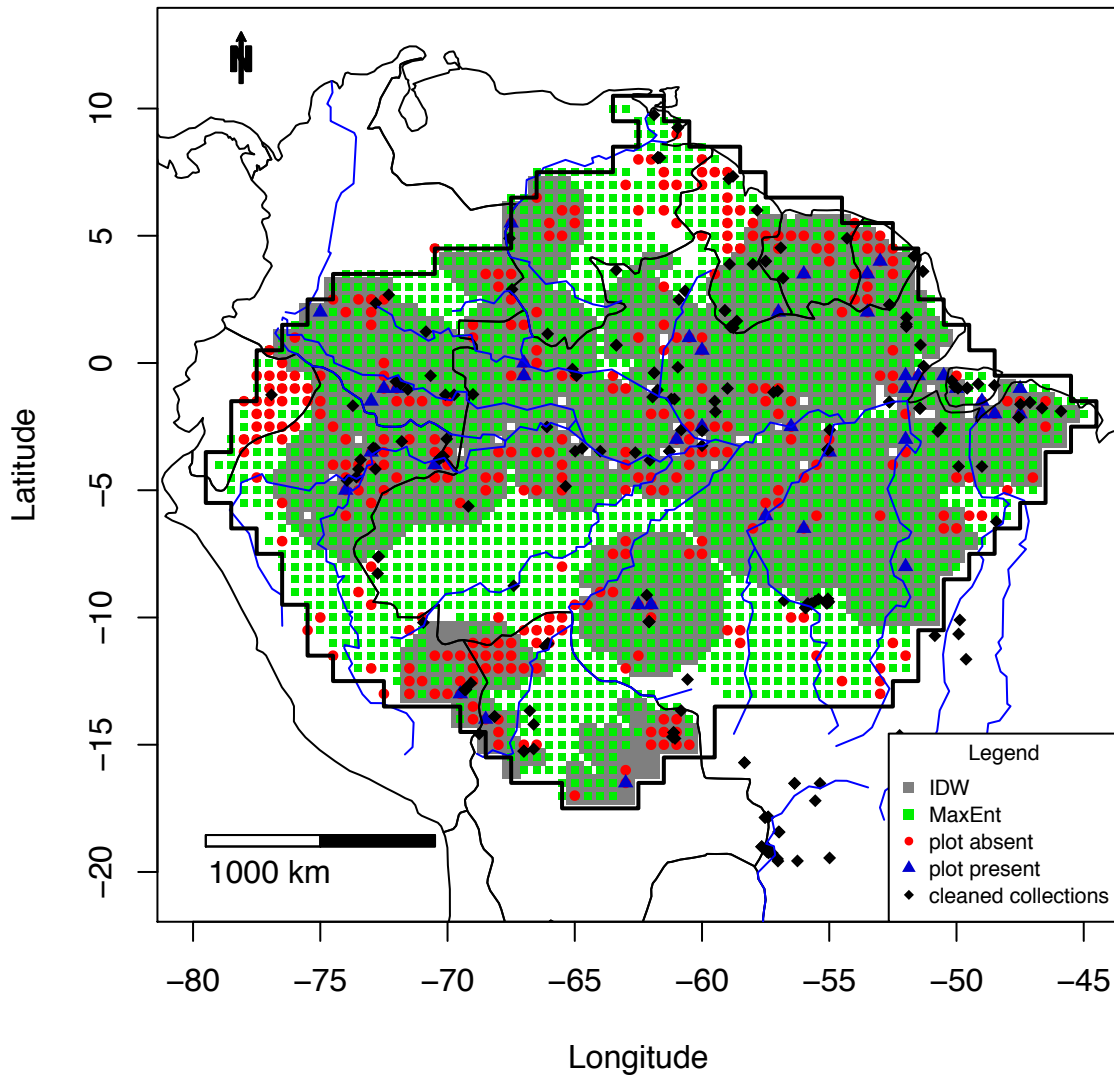

Figure S3\_138B MaxEnt map of *Pterocarpus\_santalinoides*

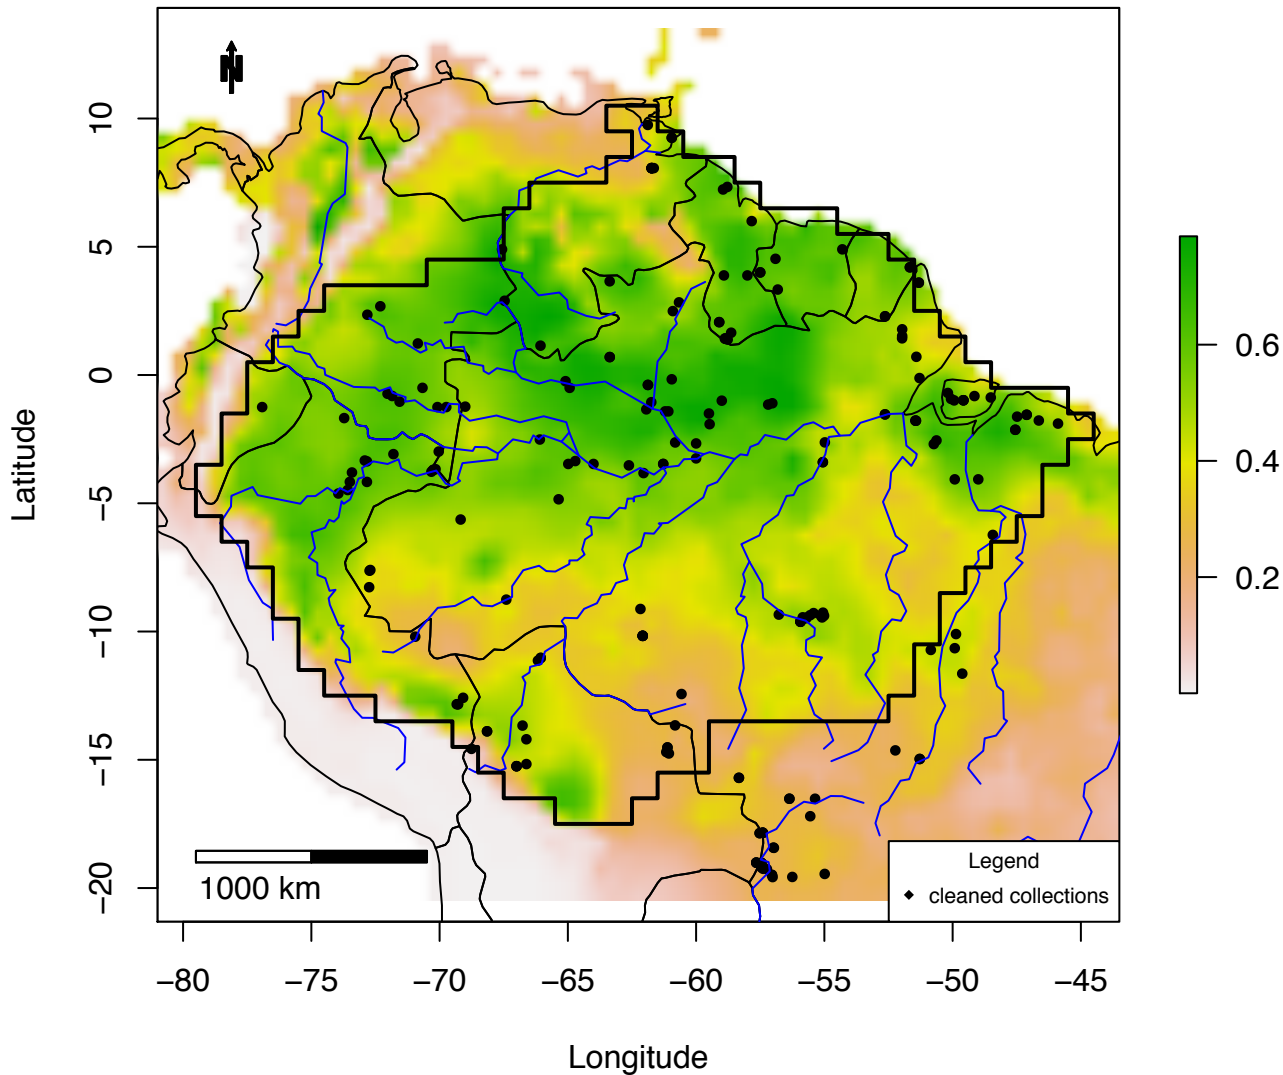

Figure S3\_138C IDW map of *Pterocarpus santalinoides*:  
plots =0 – 0.2; IDW: 0 – 0.04

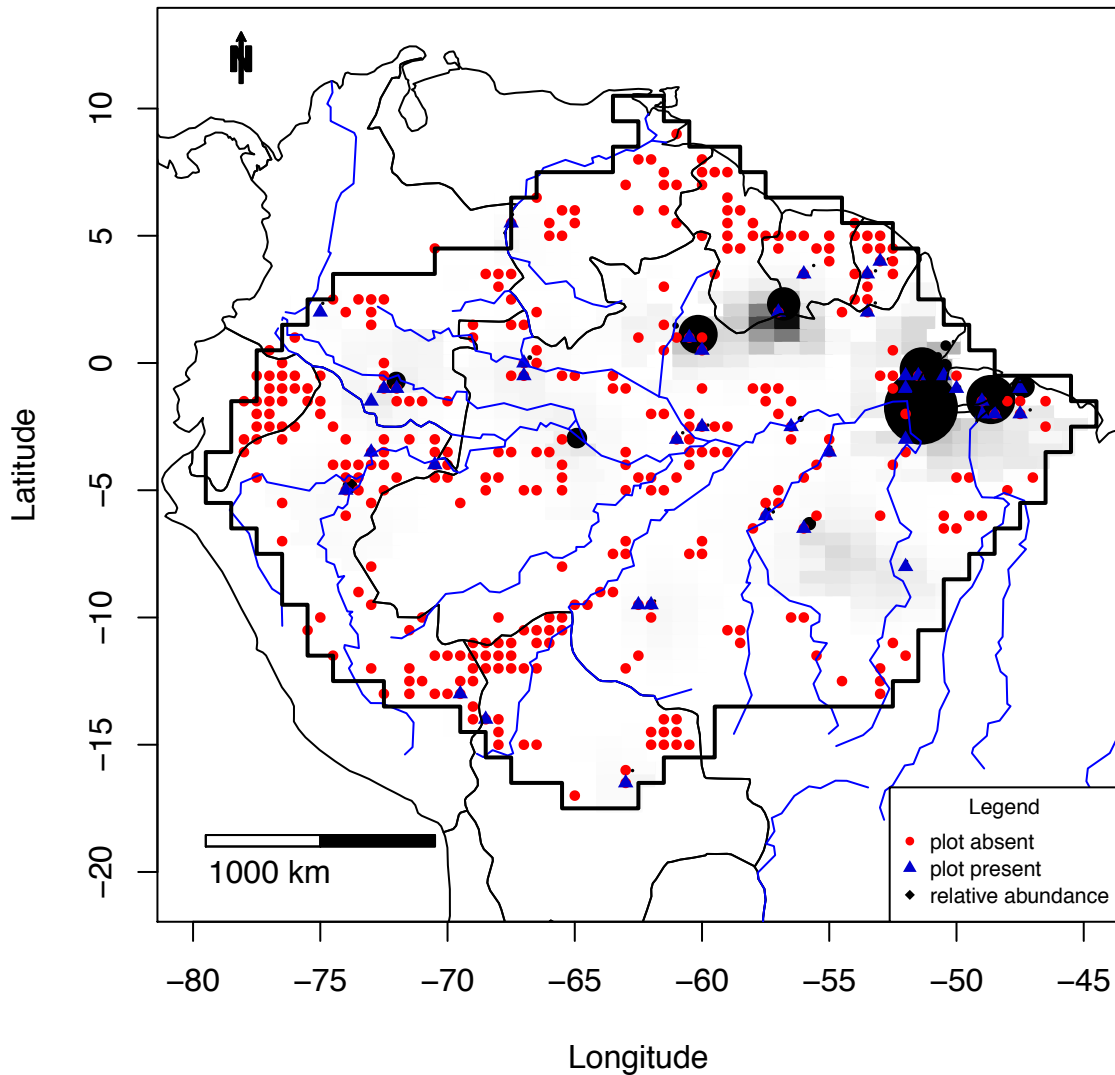

Figure S3\_139A Combined map of *Qualea paraensis*

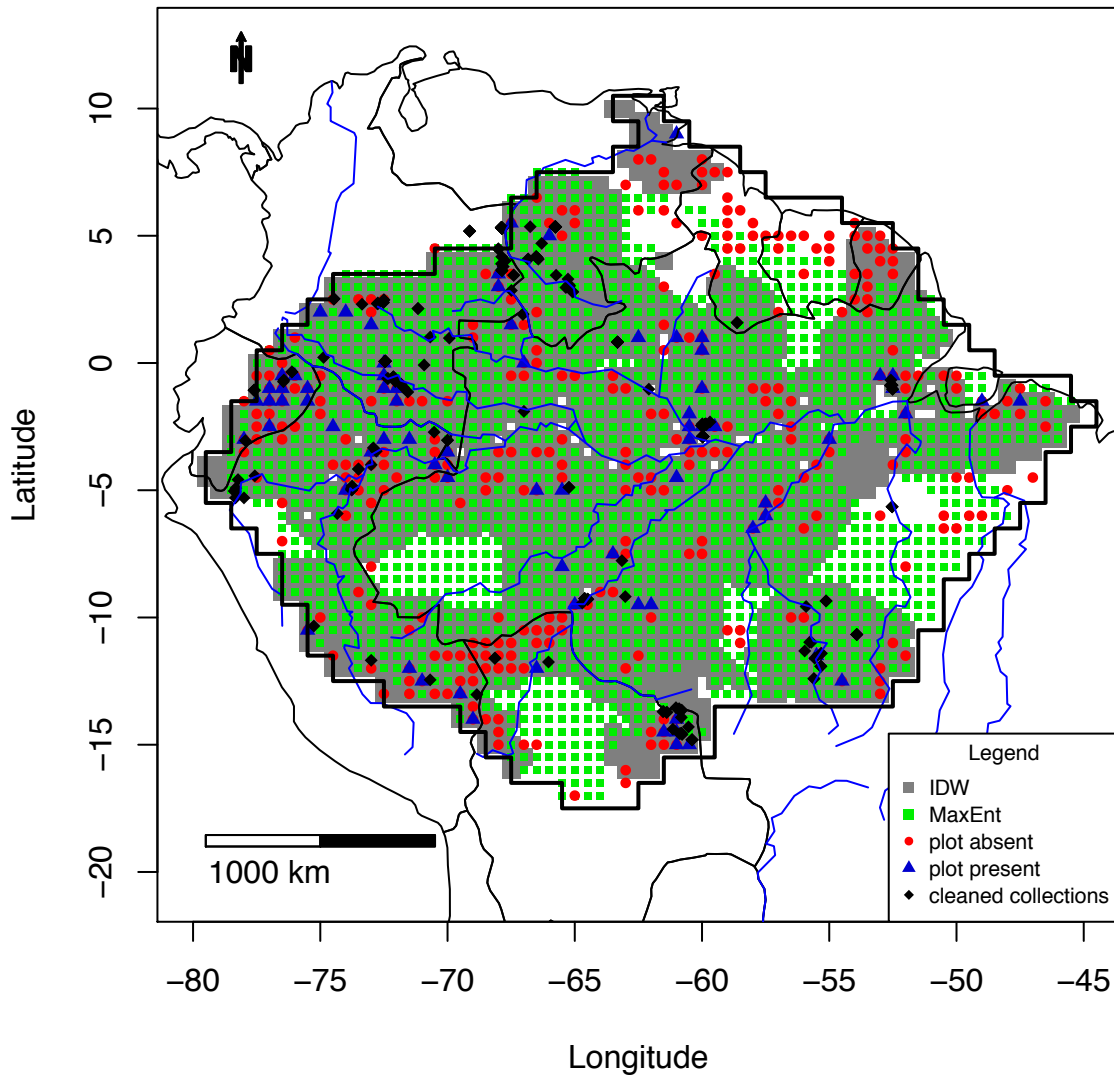



Figure S3\_139B MaxEnt map of *Qualea paraensis*

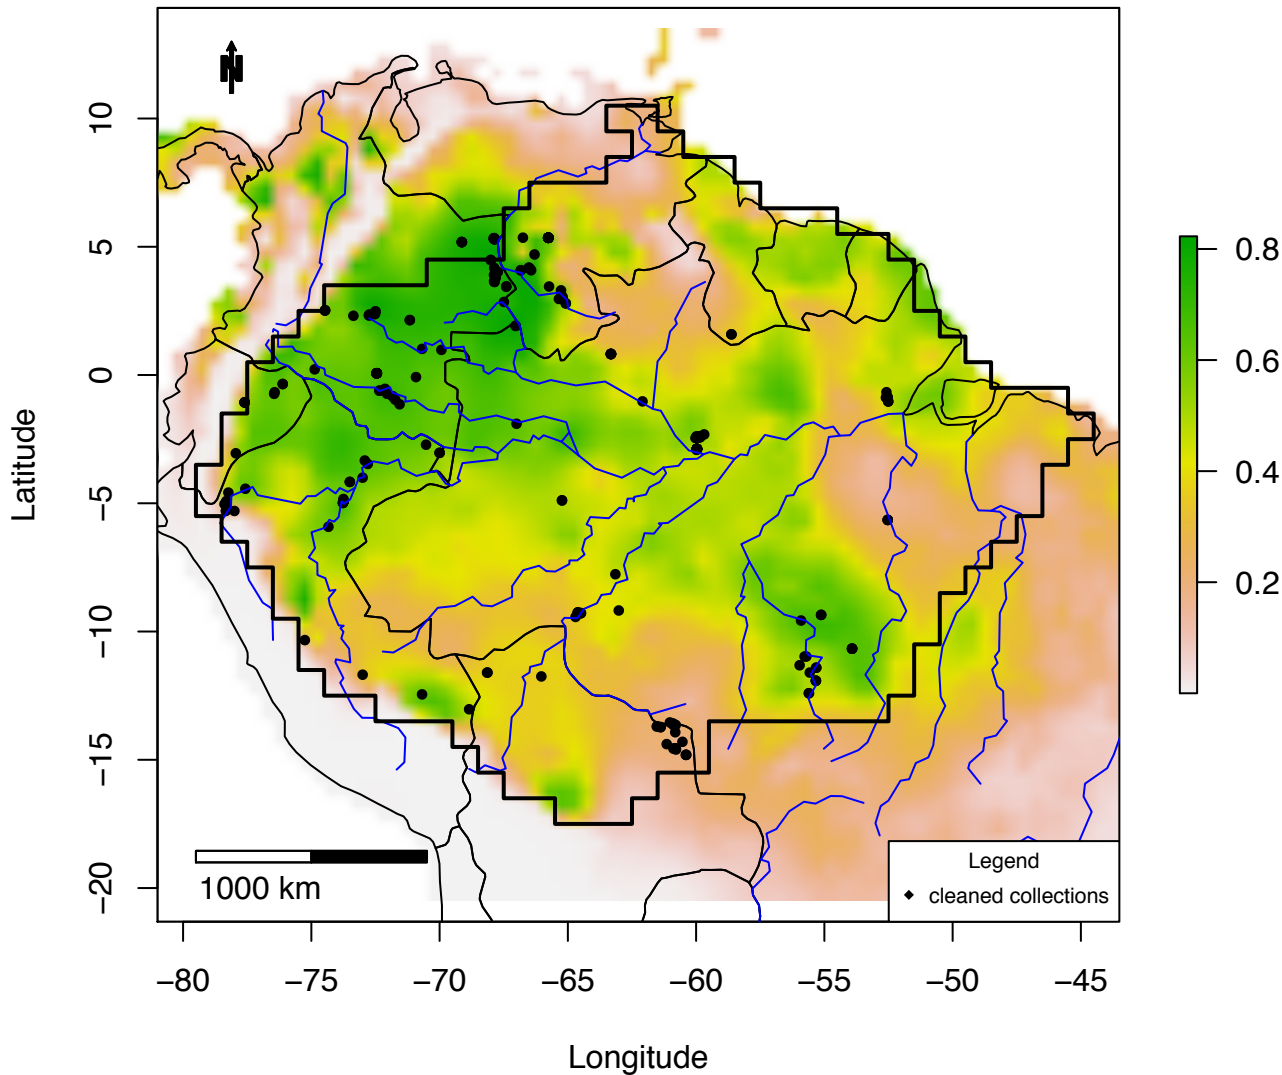

**Figure S3\_139C IDW map of *Qualea paraensis*:  
plots =0 – 0.19; IDW: 0 – 0.08**

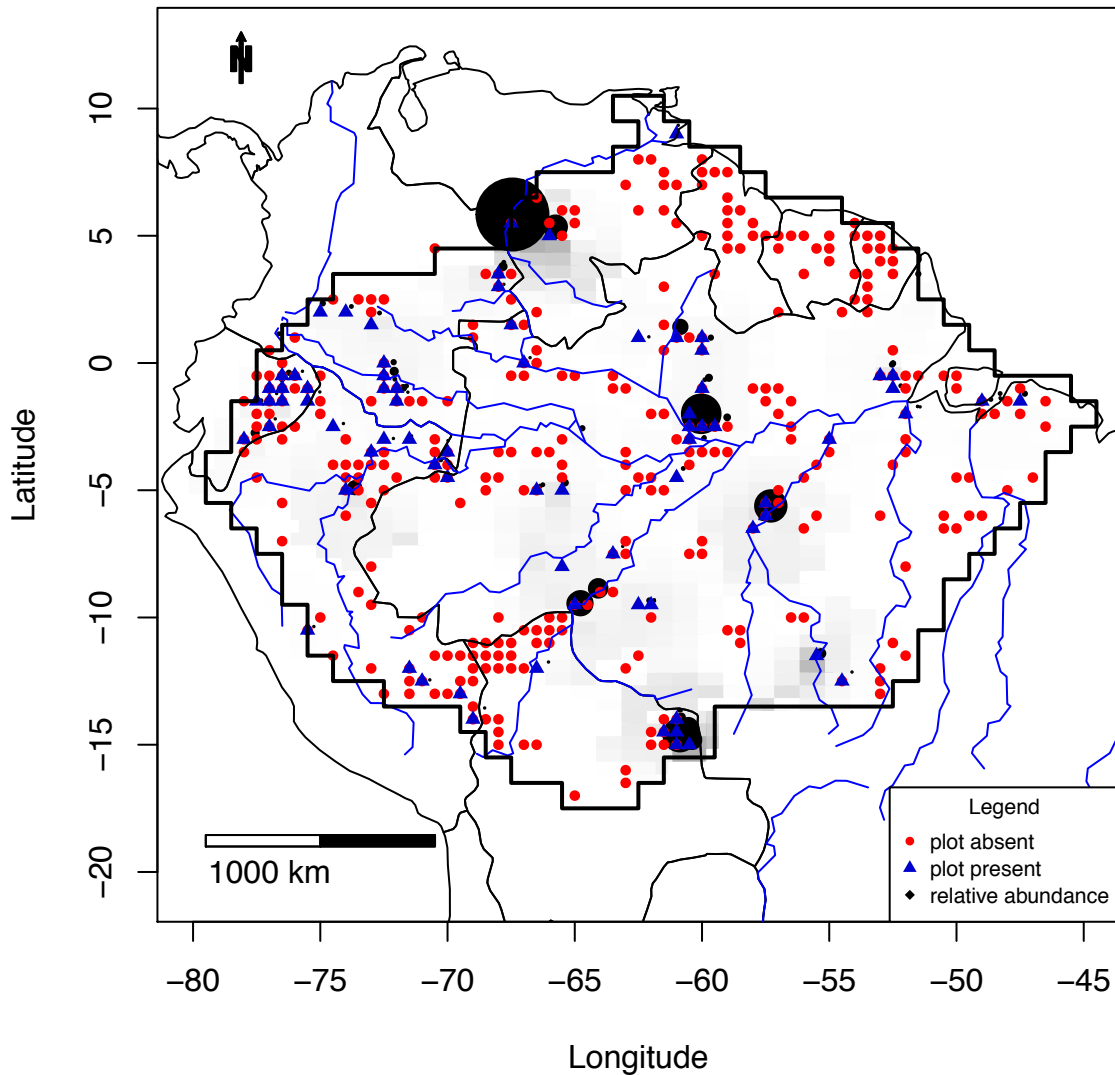

Figure S3\_140A Combined map of *Quararibea guianensis*

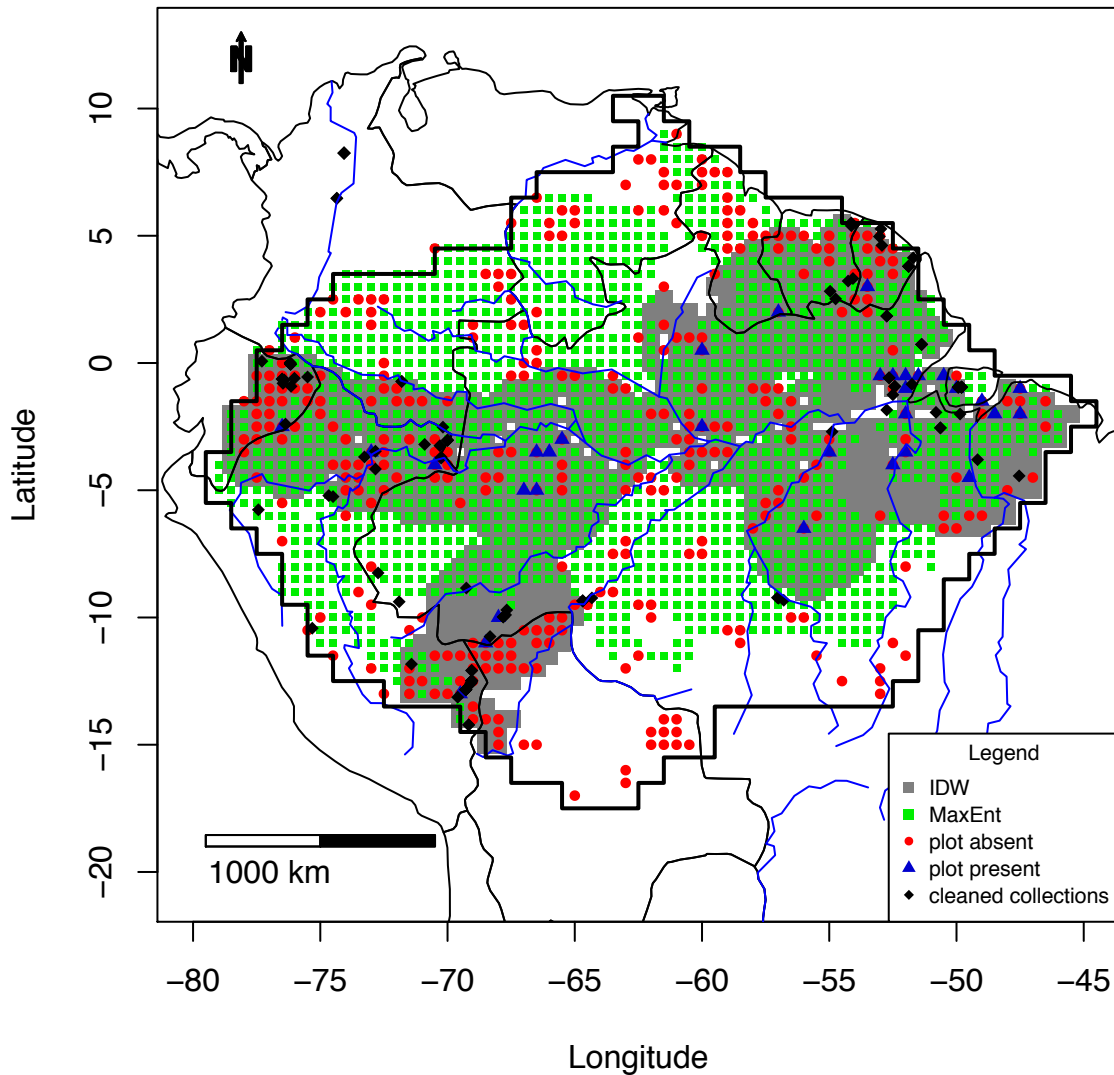

Figure S3\_140B MaxEnt map of *Quararibea guianensis*

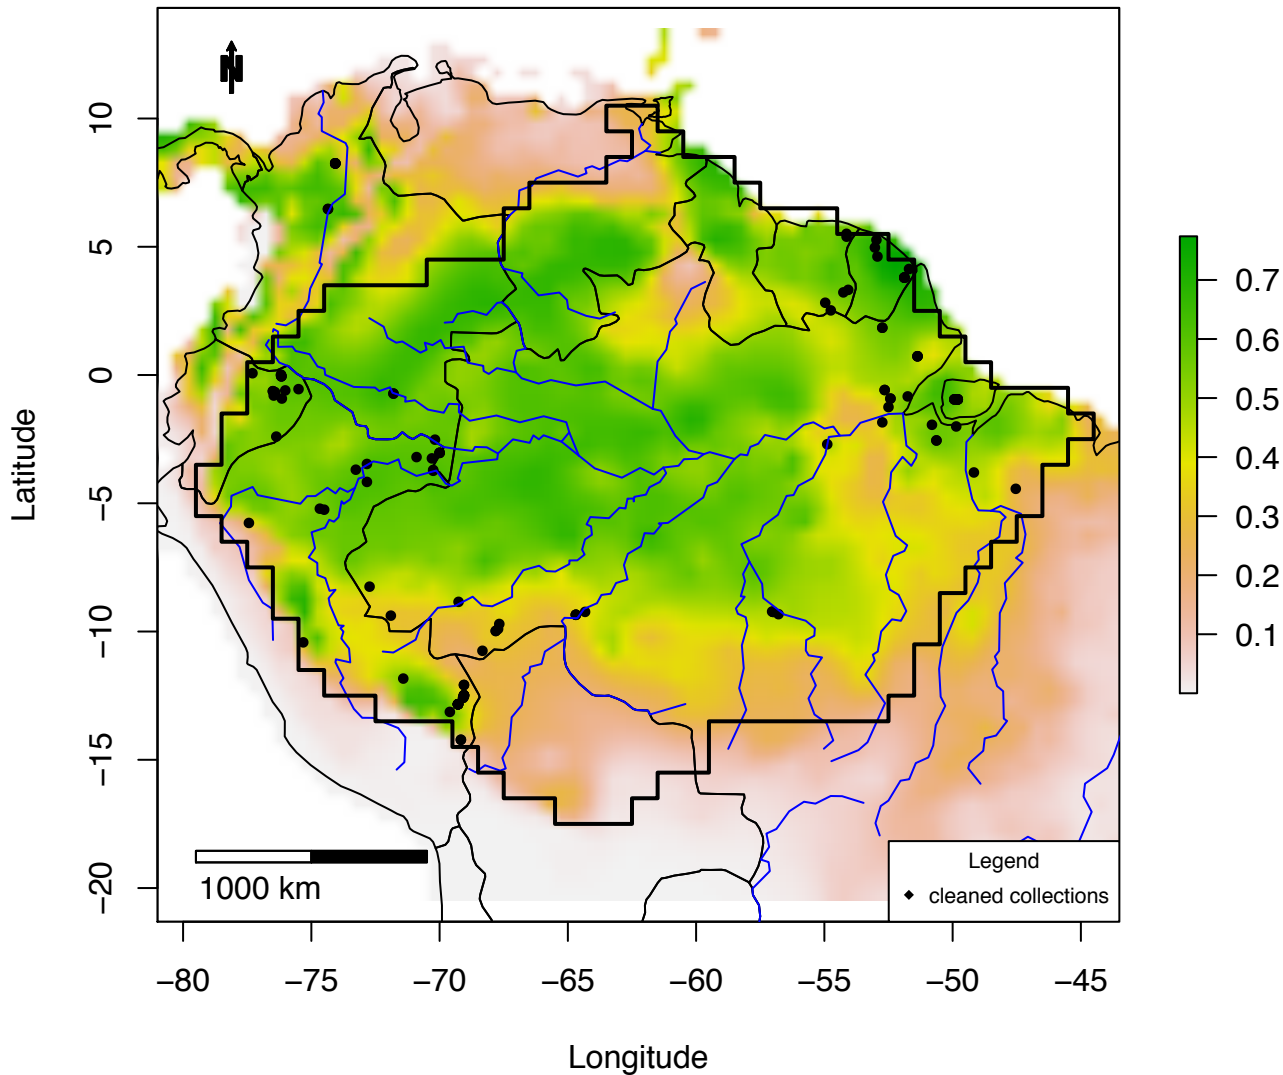

**Figure S3\_140C IDW map of *Quararibea guianensis*:  
plots =0 – 0.18; IDW: 0 – 0.05**

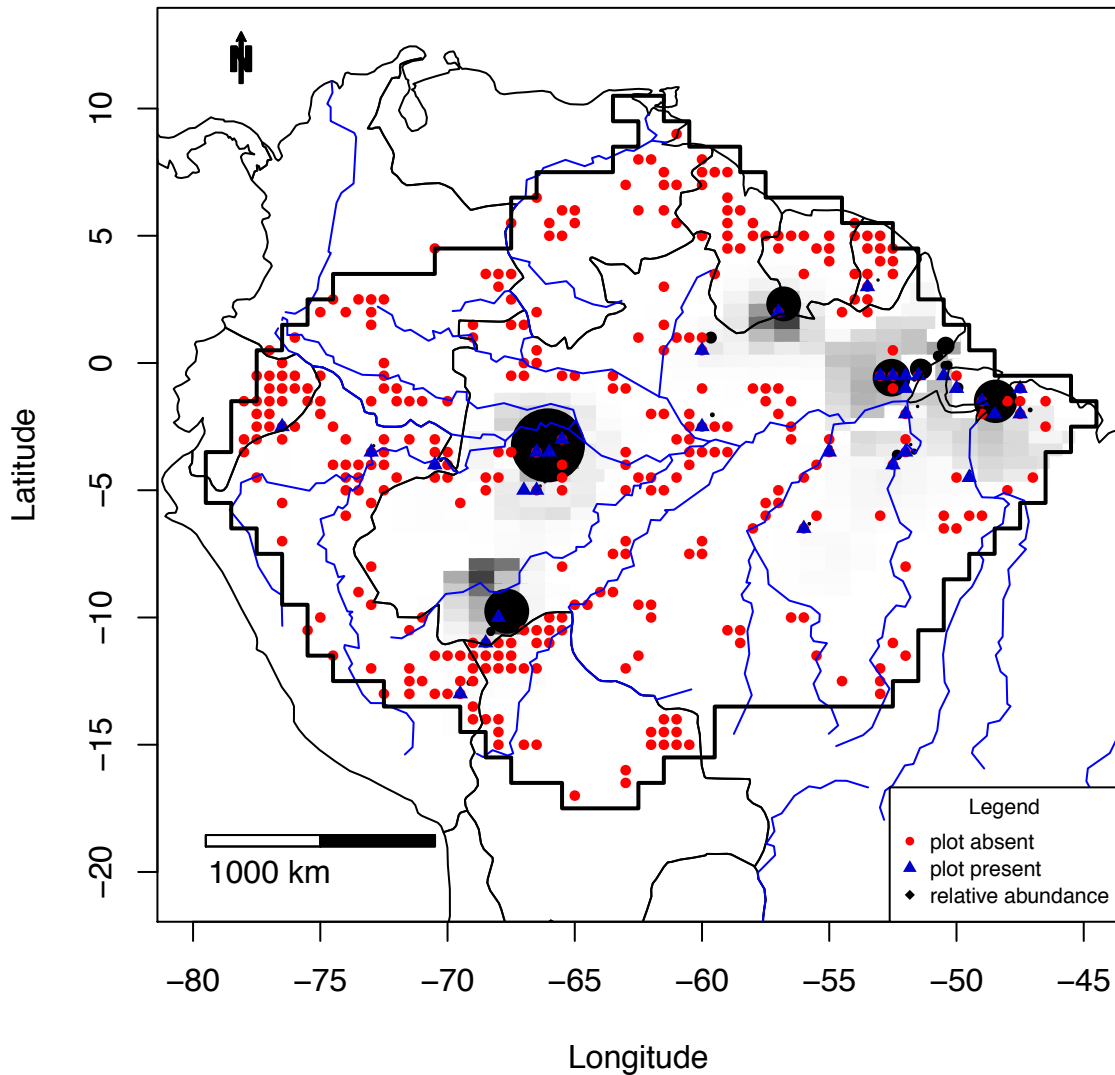

Figure S3\_141A Combined map of *Quararibea\_wittii*

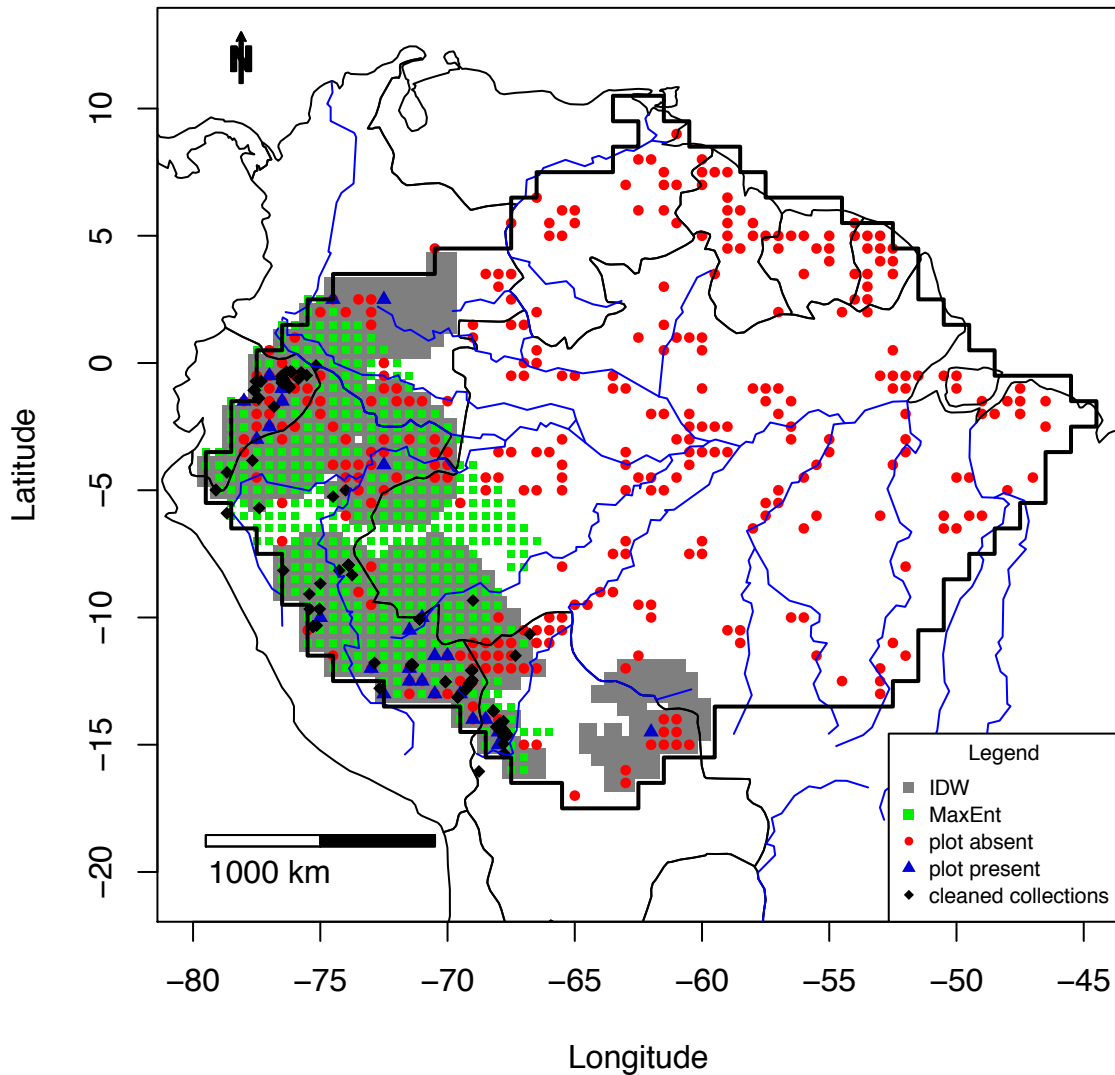

Figure S3\_141B MaxEnt map of *Quararibea\_wittii*

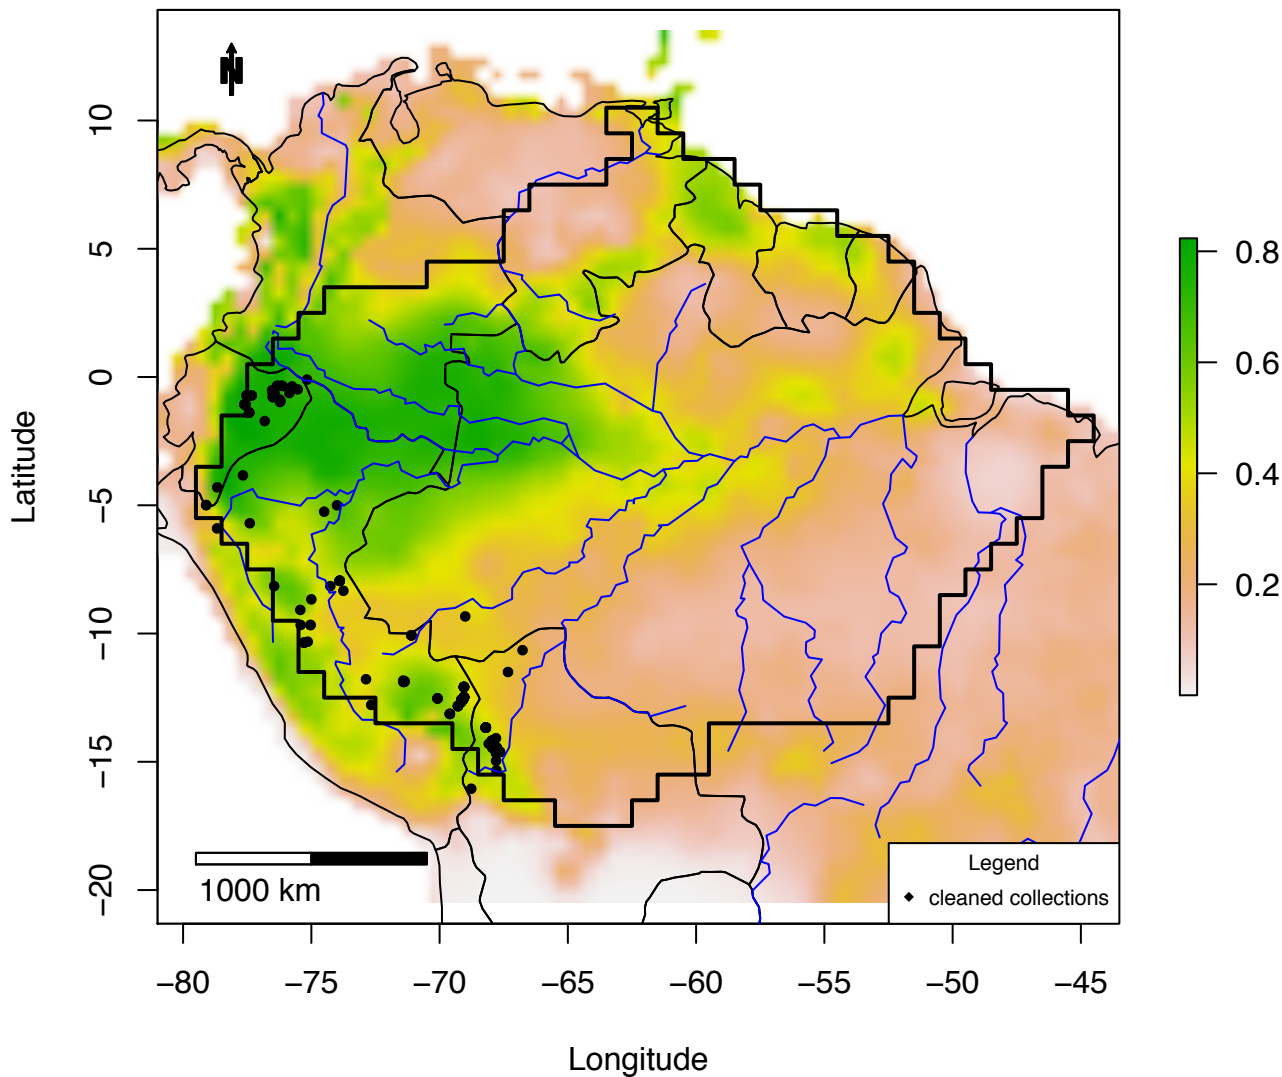

Figure S3\_141C IDW map of *Quararibea wittii*:  
plots =0 – 0.13; IDW: 0 – 0.07

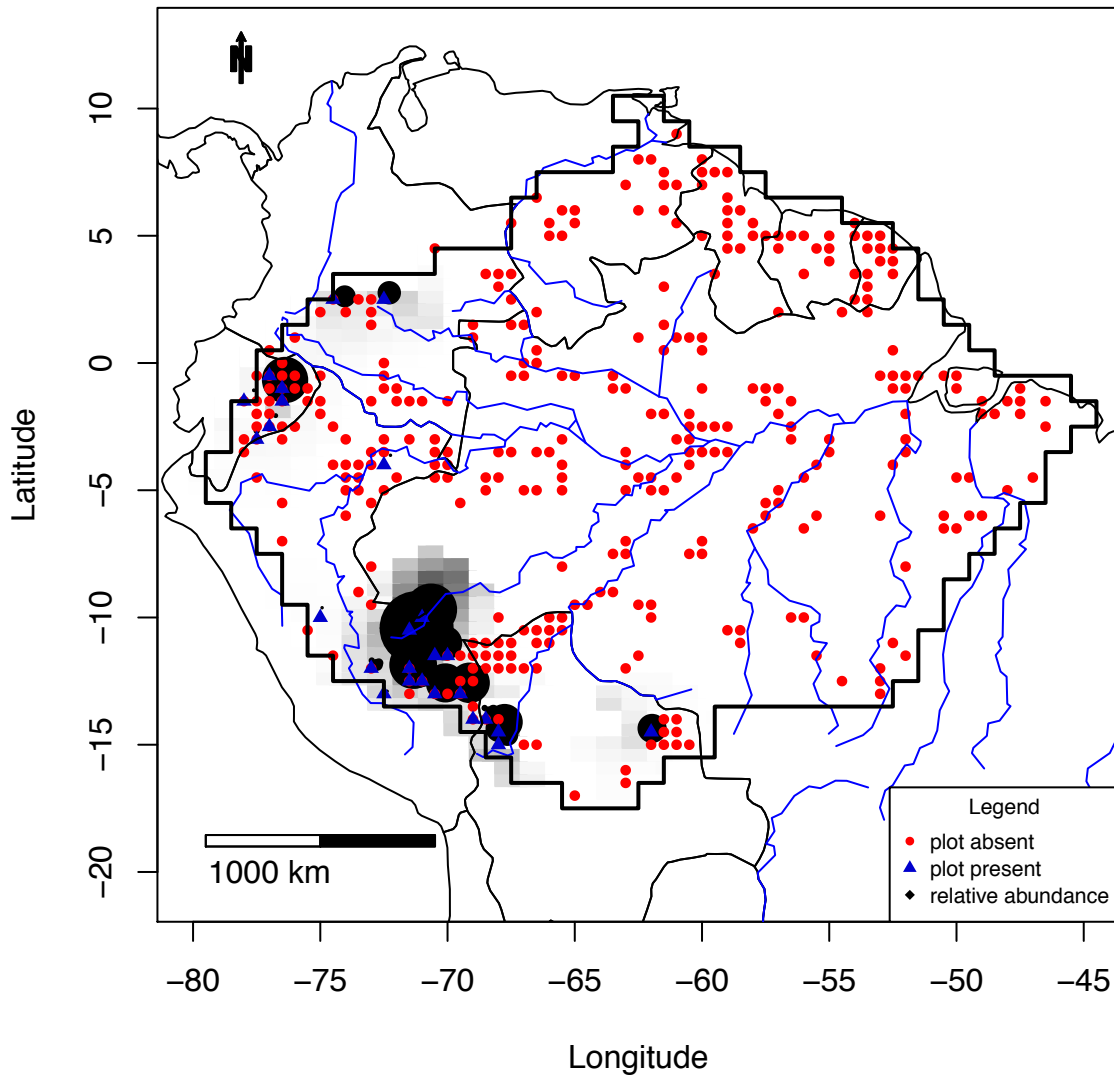



Figure S3\_142A Combined map of *Rinorea\_racemosa*

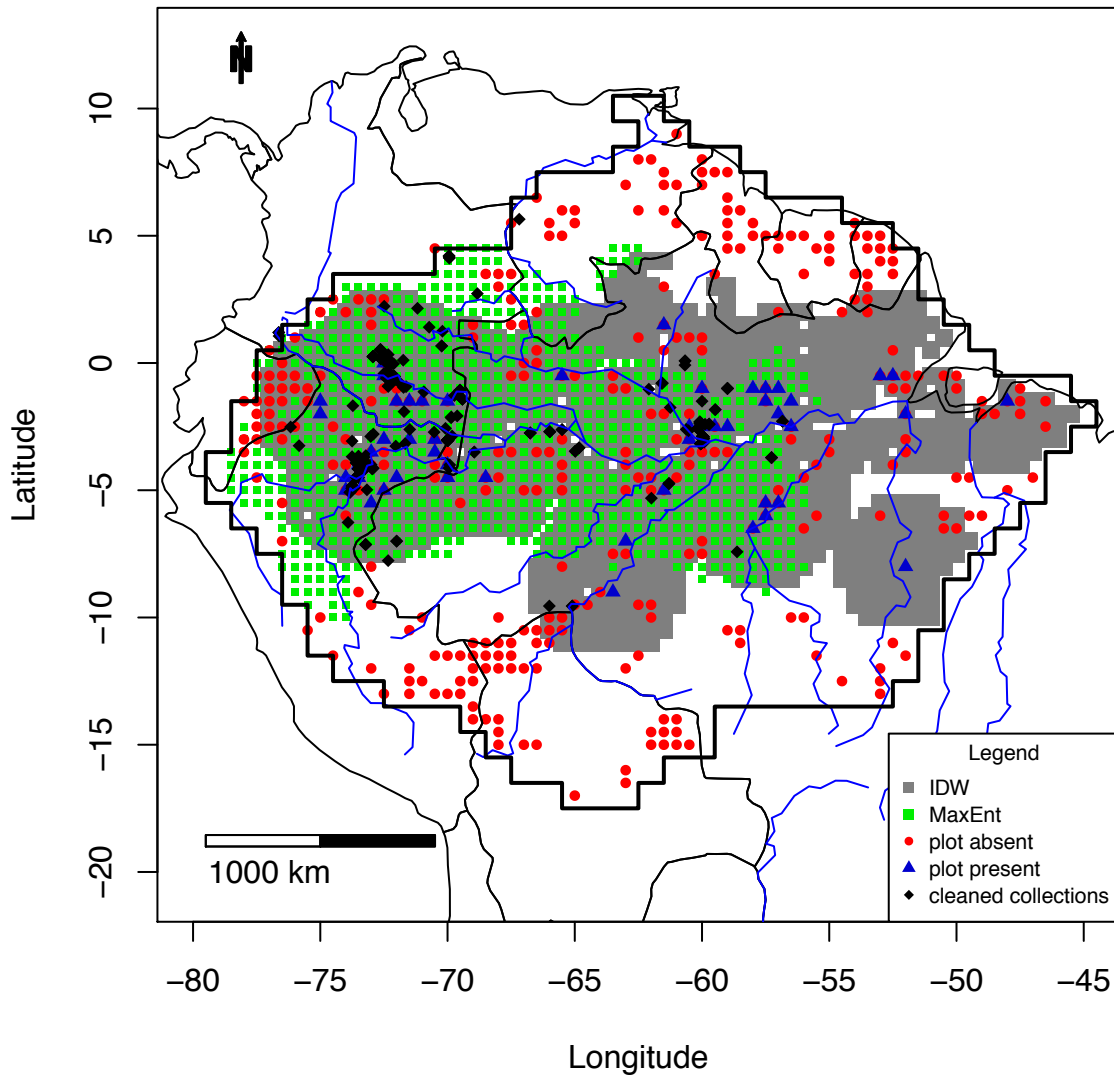

Figure S3\_142B MaxEnt map of *Rinorea racemosa*

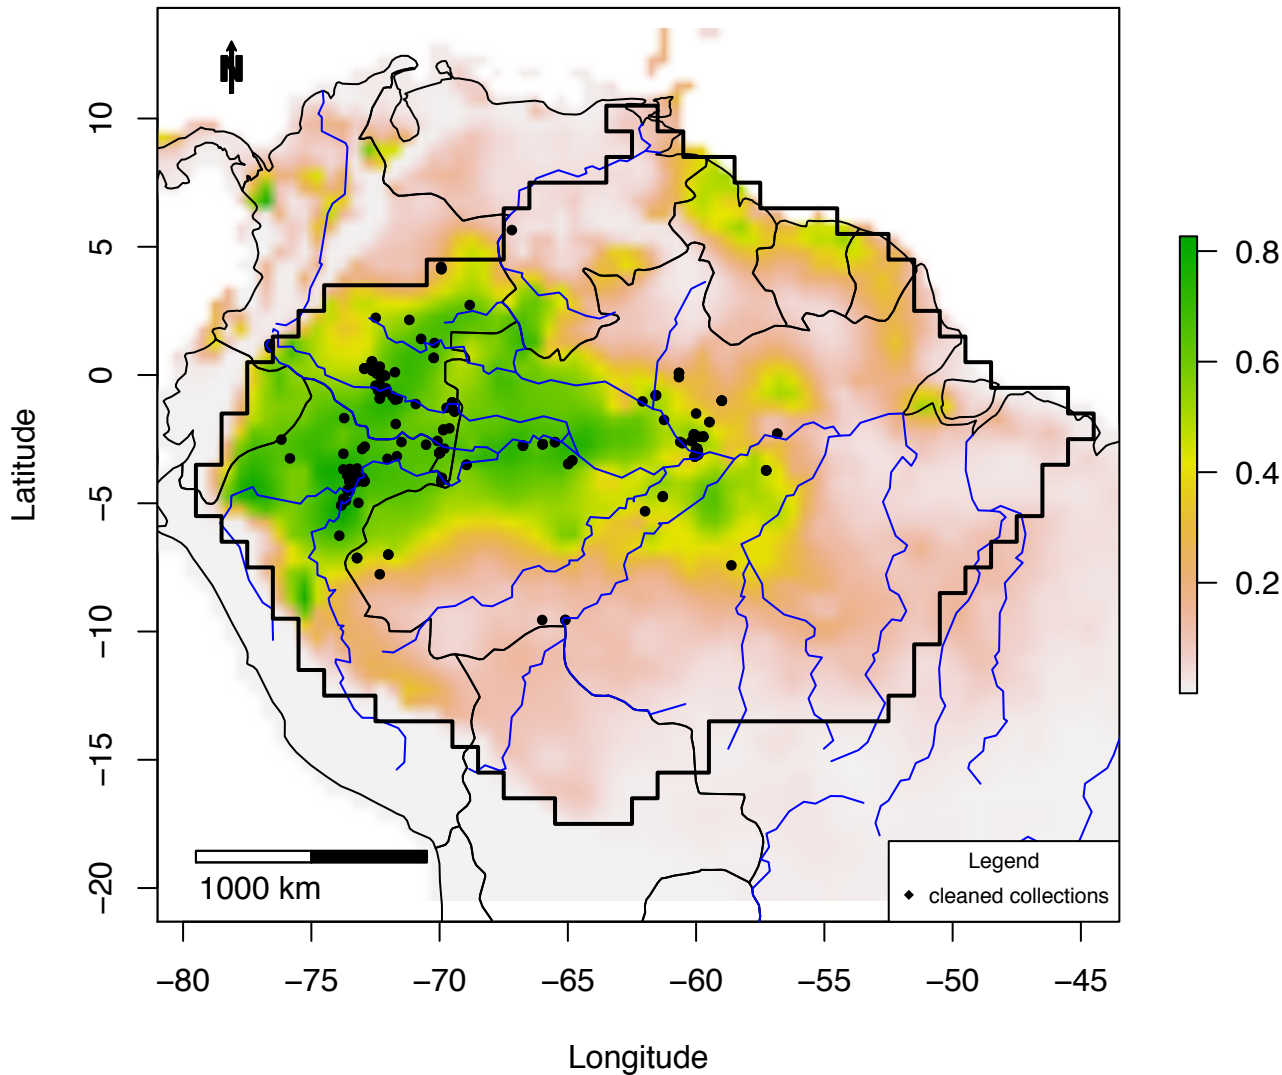

**Figure S3\_142C IDW map of *Rinorea racemosa*:**  
**plots =0 – 0.13; IDW: 0 – 0.05**

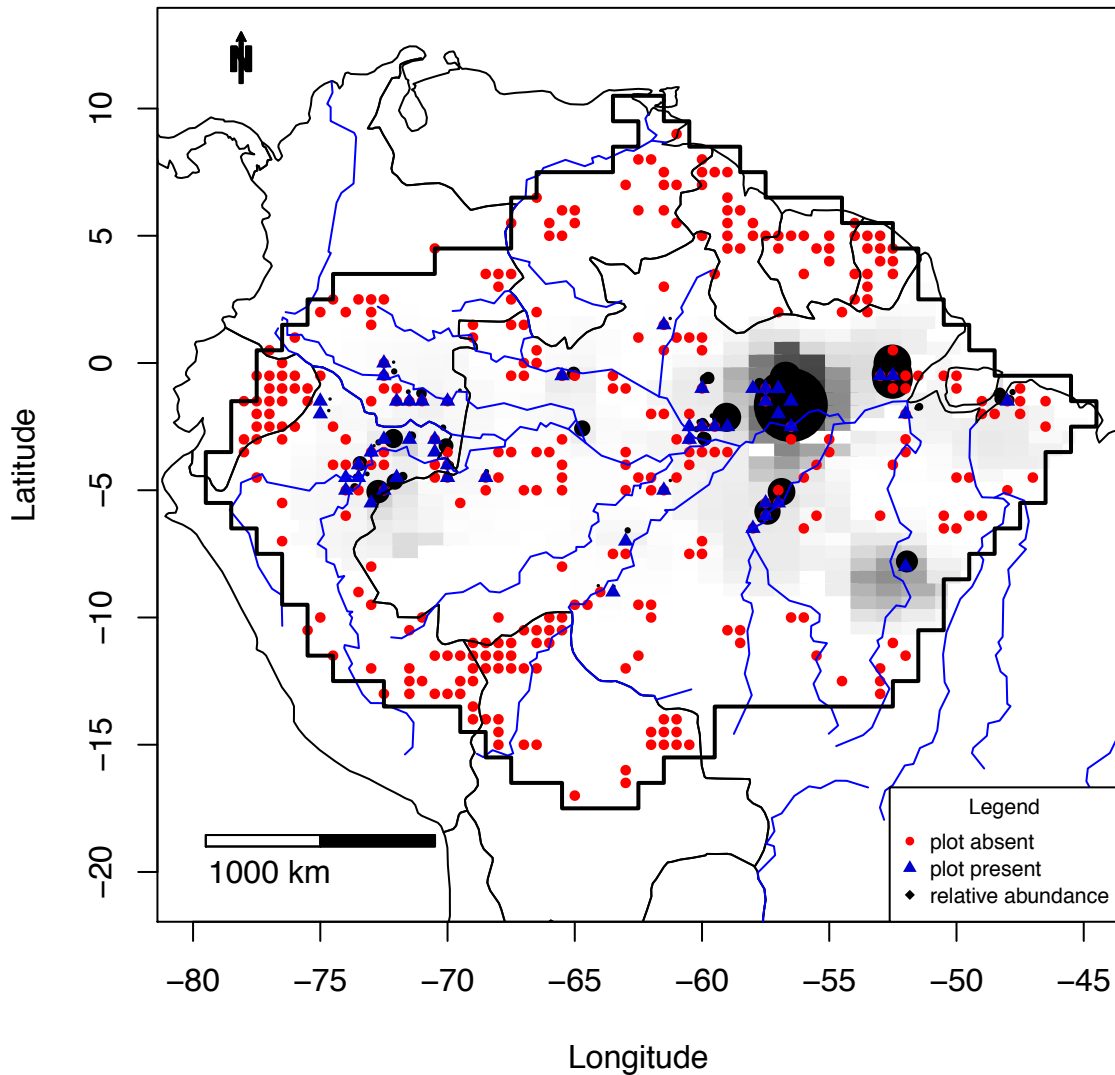

Figure S3\_143A Combined map of *Rinoreaocarpus\_ulei*

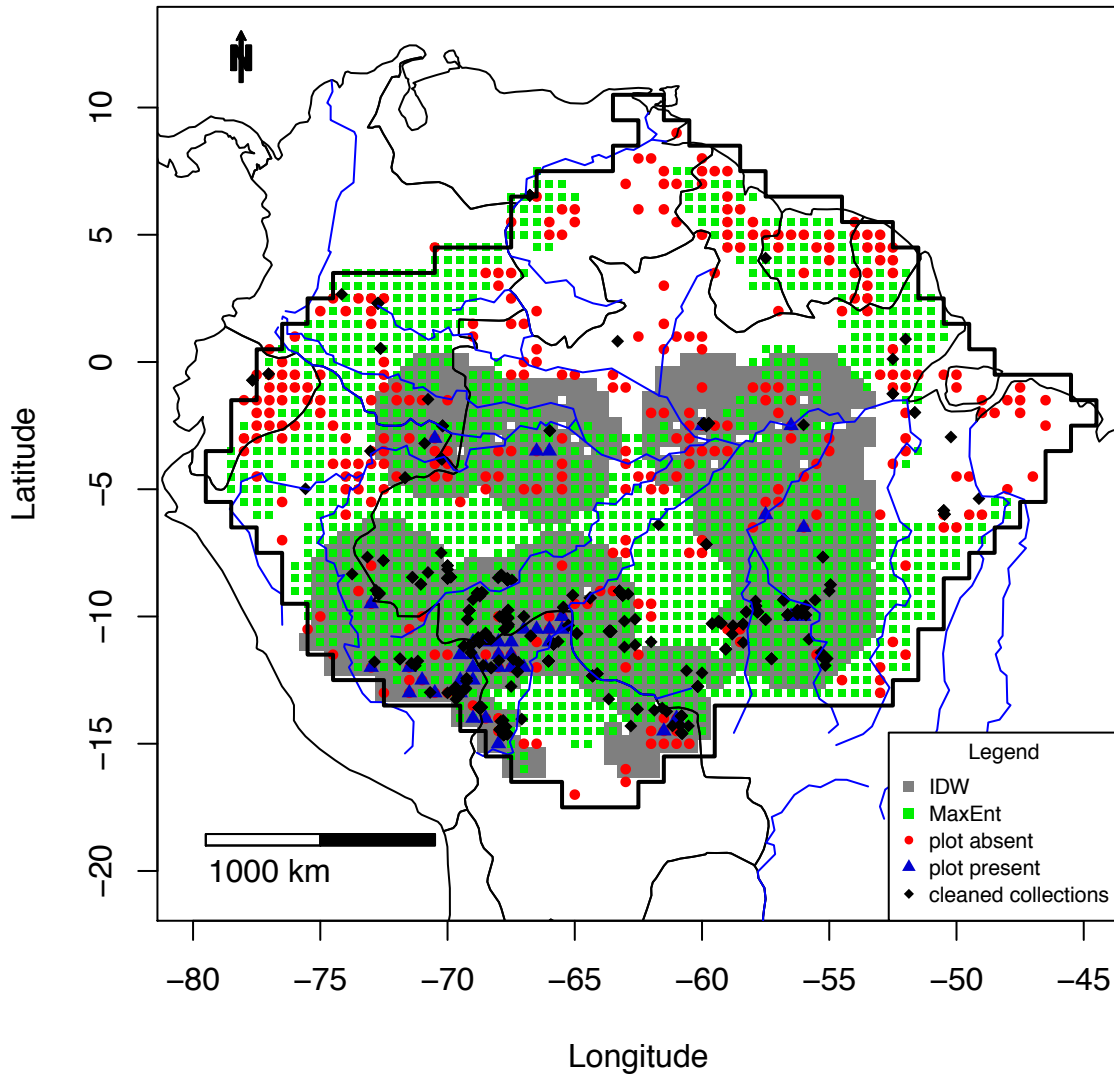

Figure S3\_143B MaxEnt map of *Rinoreocarpus\_ulei*

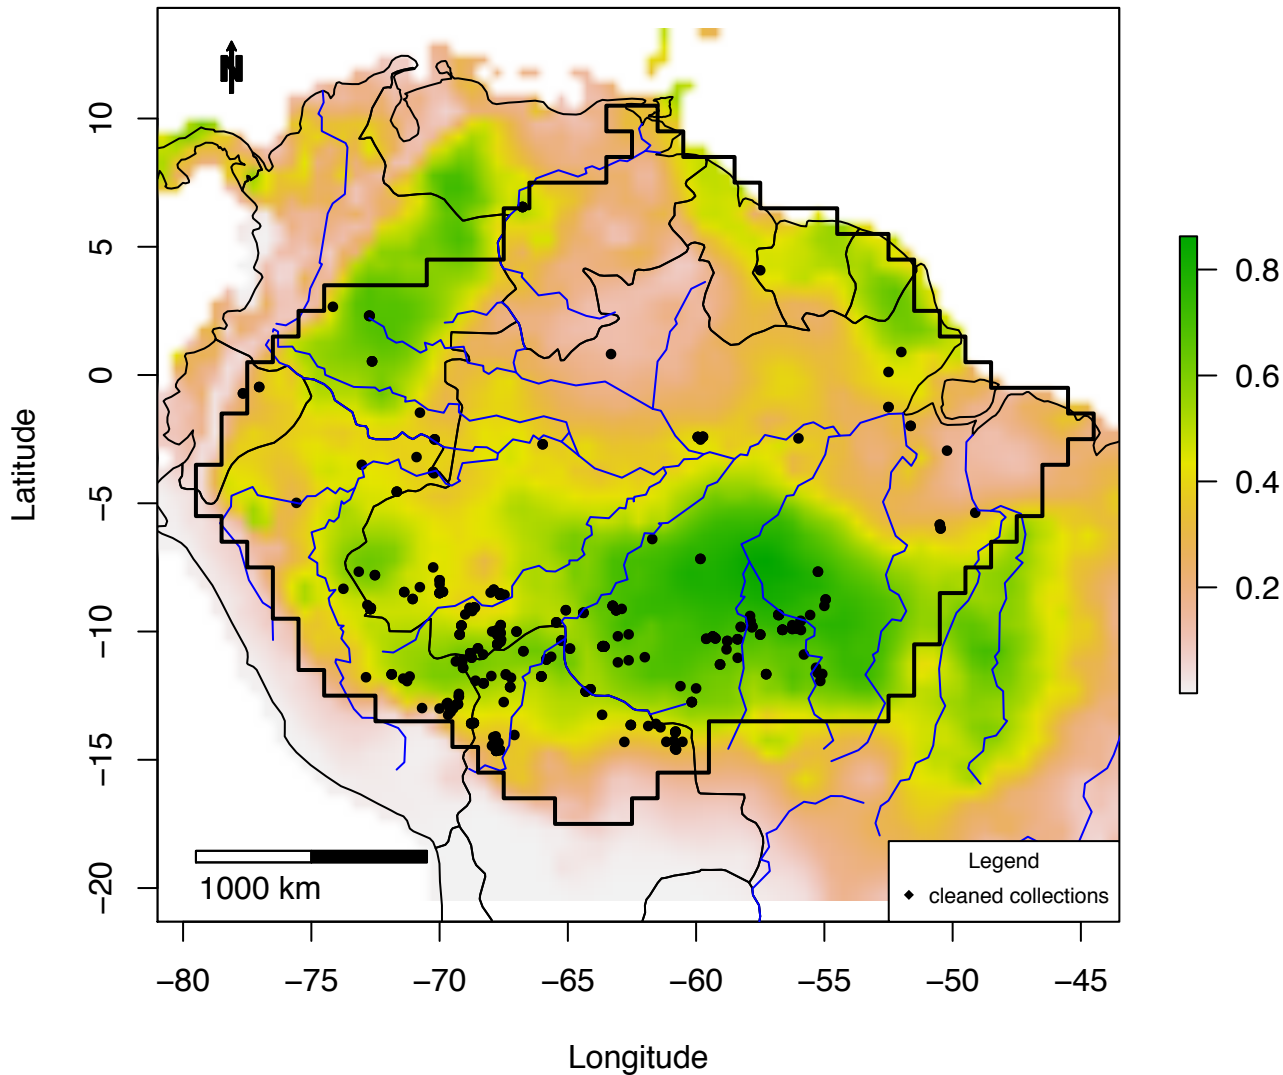

Figure S3\_143C IDW map of *Rinoreocarpus\_ulei*:  
plots =0 – 0.31; IDW: 0 – 0.12

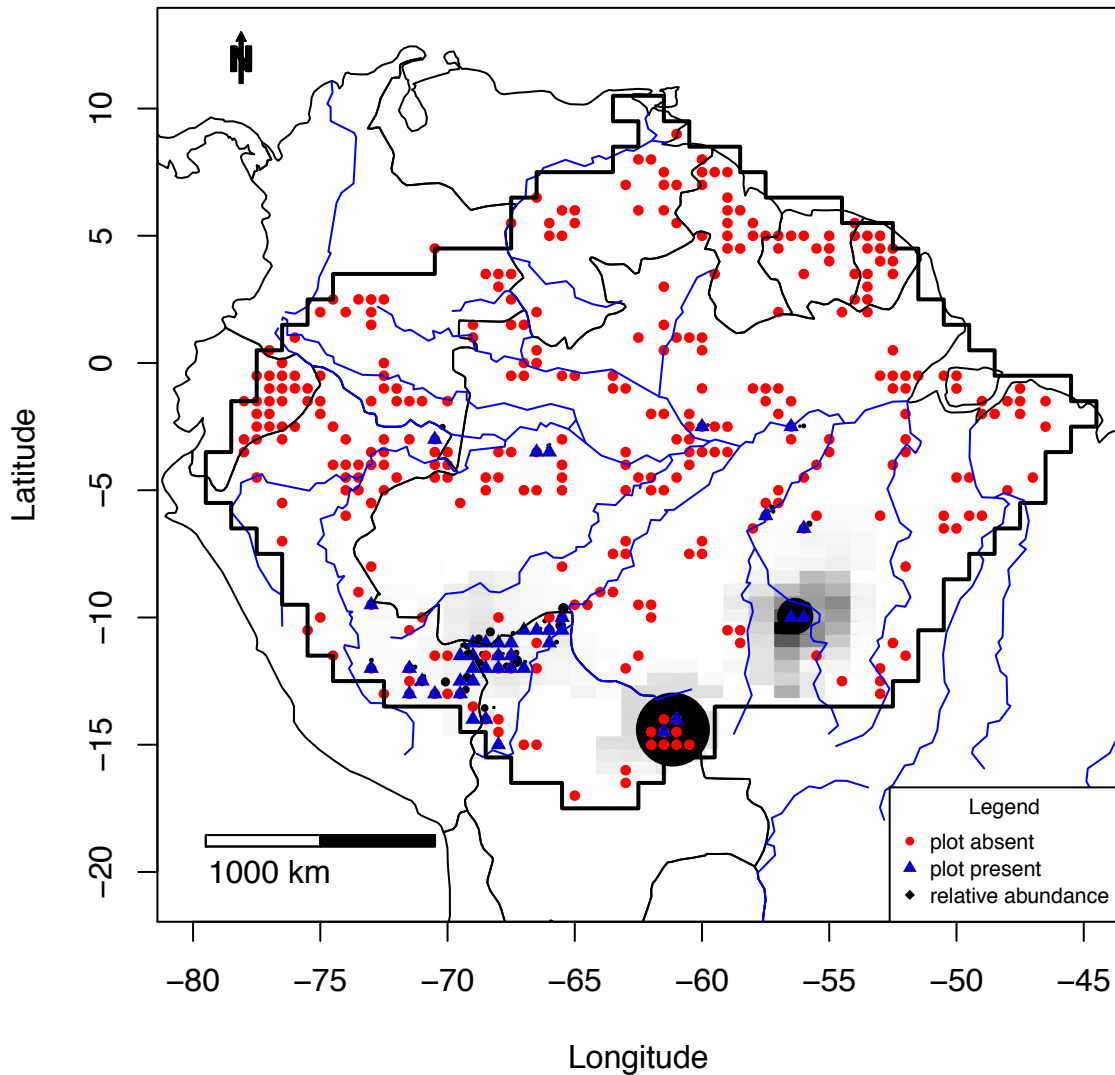

Figure S3\_144A Combined map of *Sacoglottis guianensis*

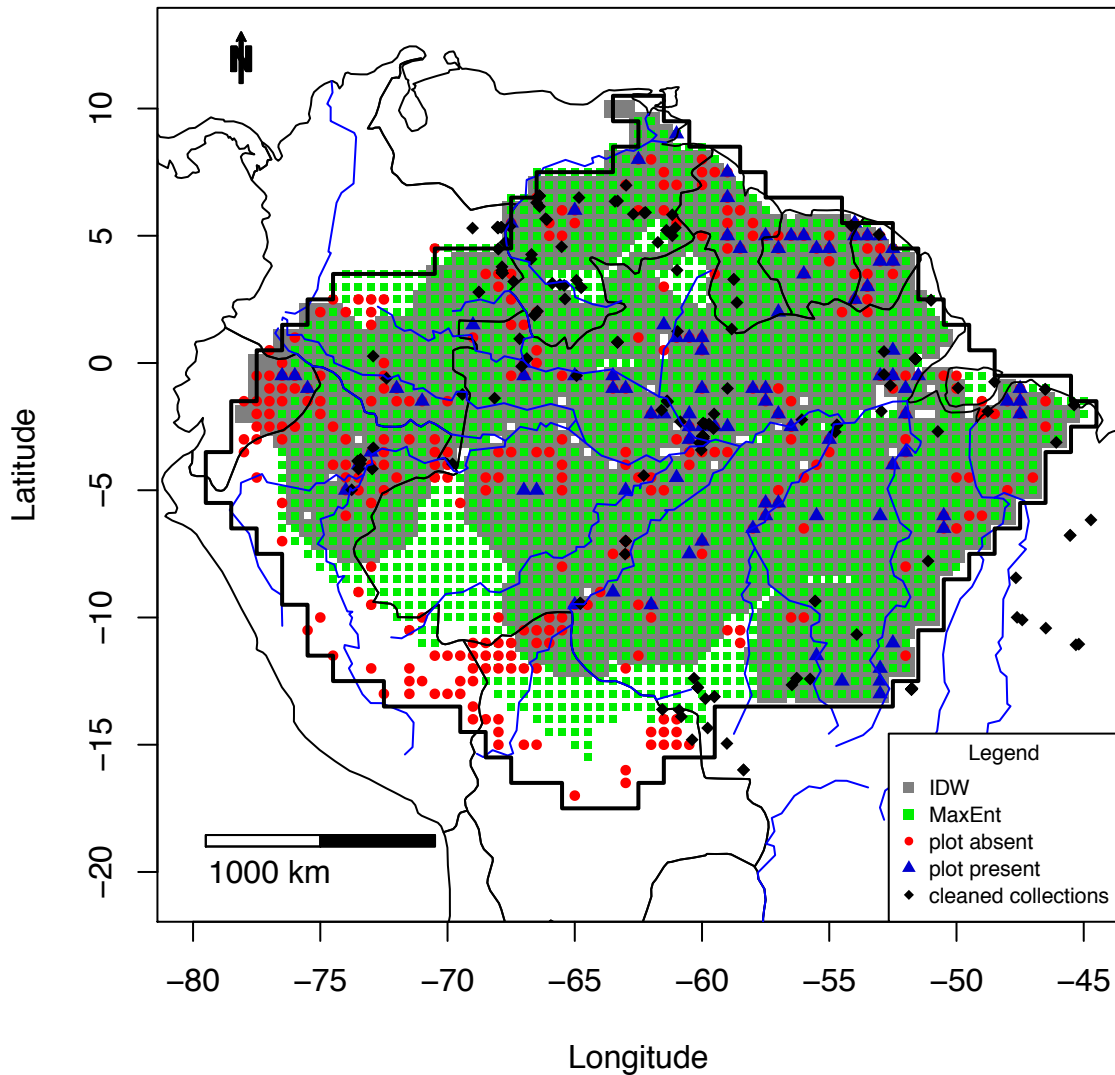

Figure S3\_144B MaxEnt map of *Sacoglottis guianensis*

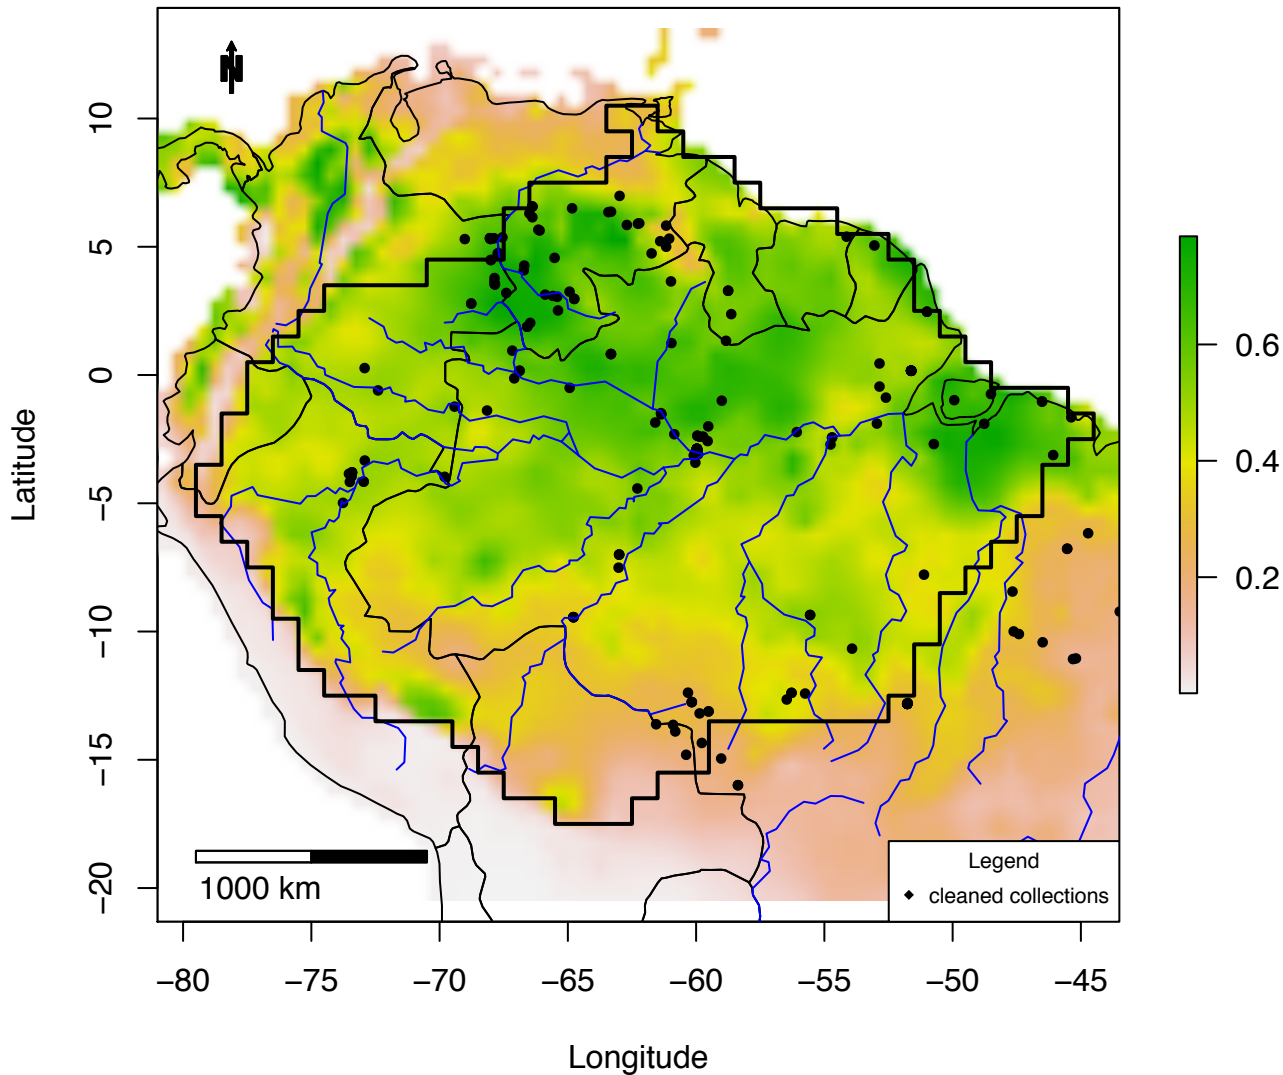



Figure S3\_144C IDW map of *Sacoglottis guianensis*:  
plots =0 – 0.28; IDW: 0 – 0.06

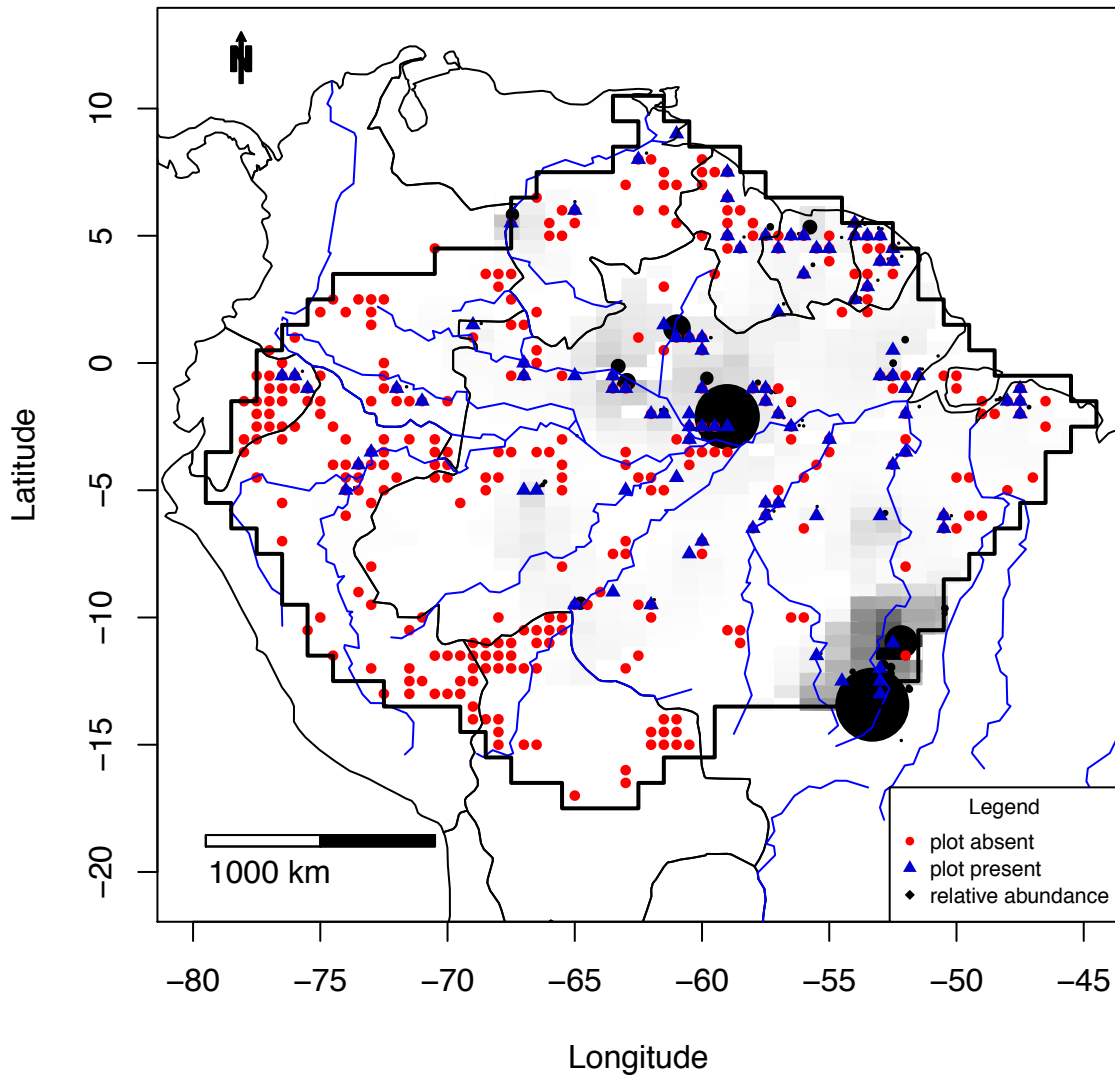

Figure S3\_145A Combined map of *Sagotia brachysepala*

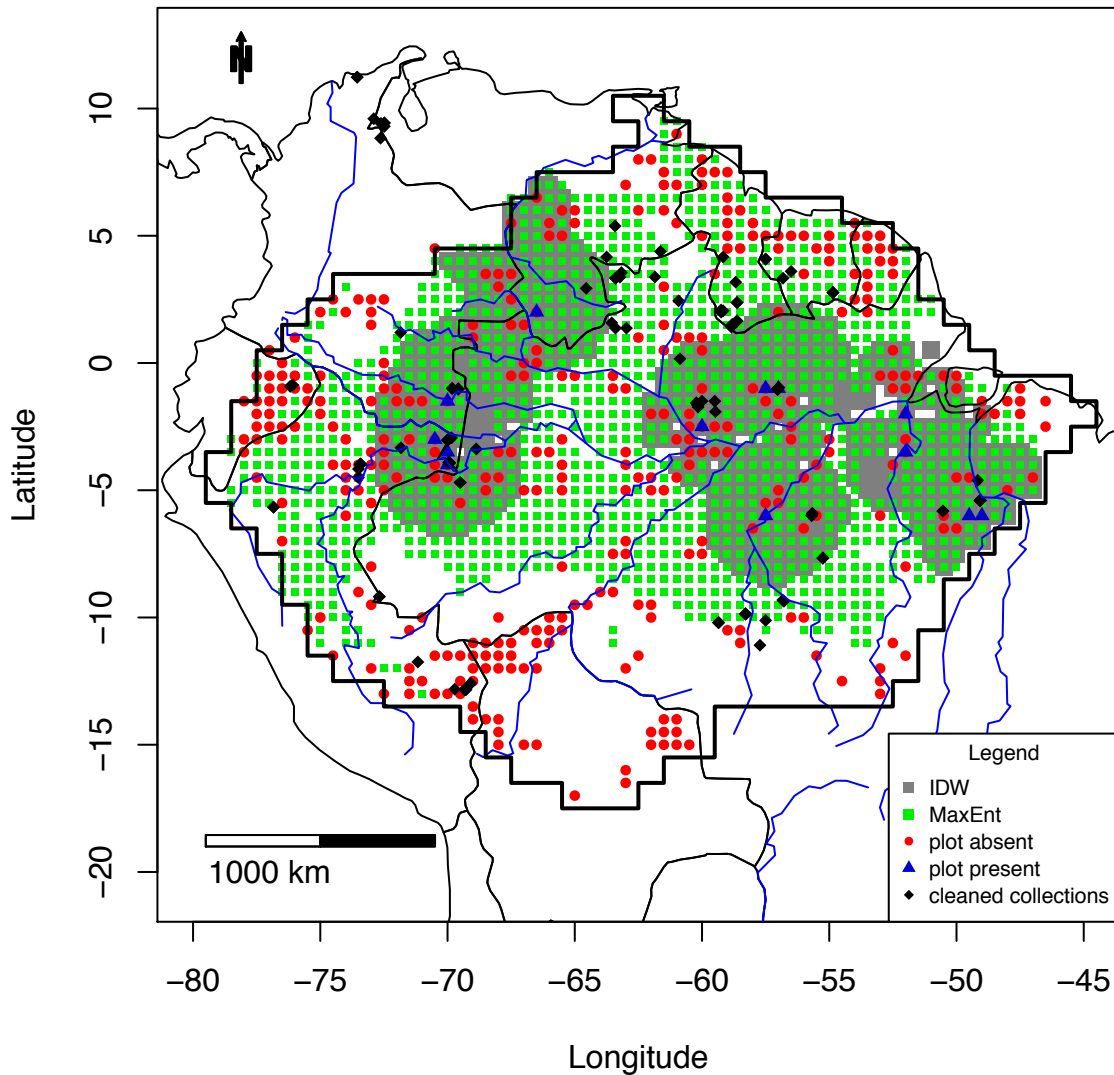

Figure S3\_145B MaxEnt map of *Sagotia brachysepala*

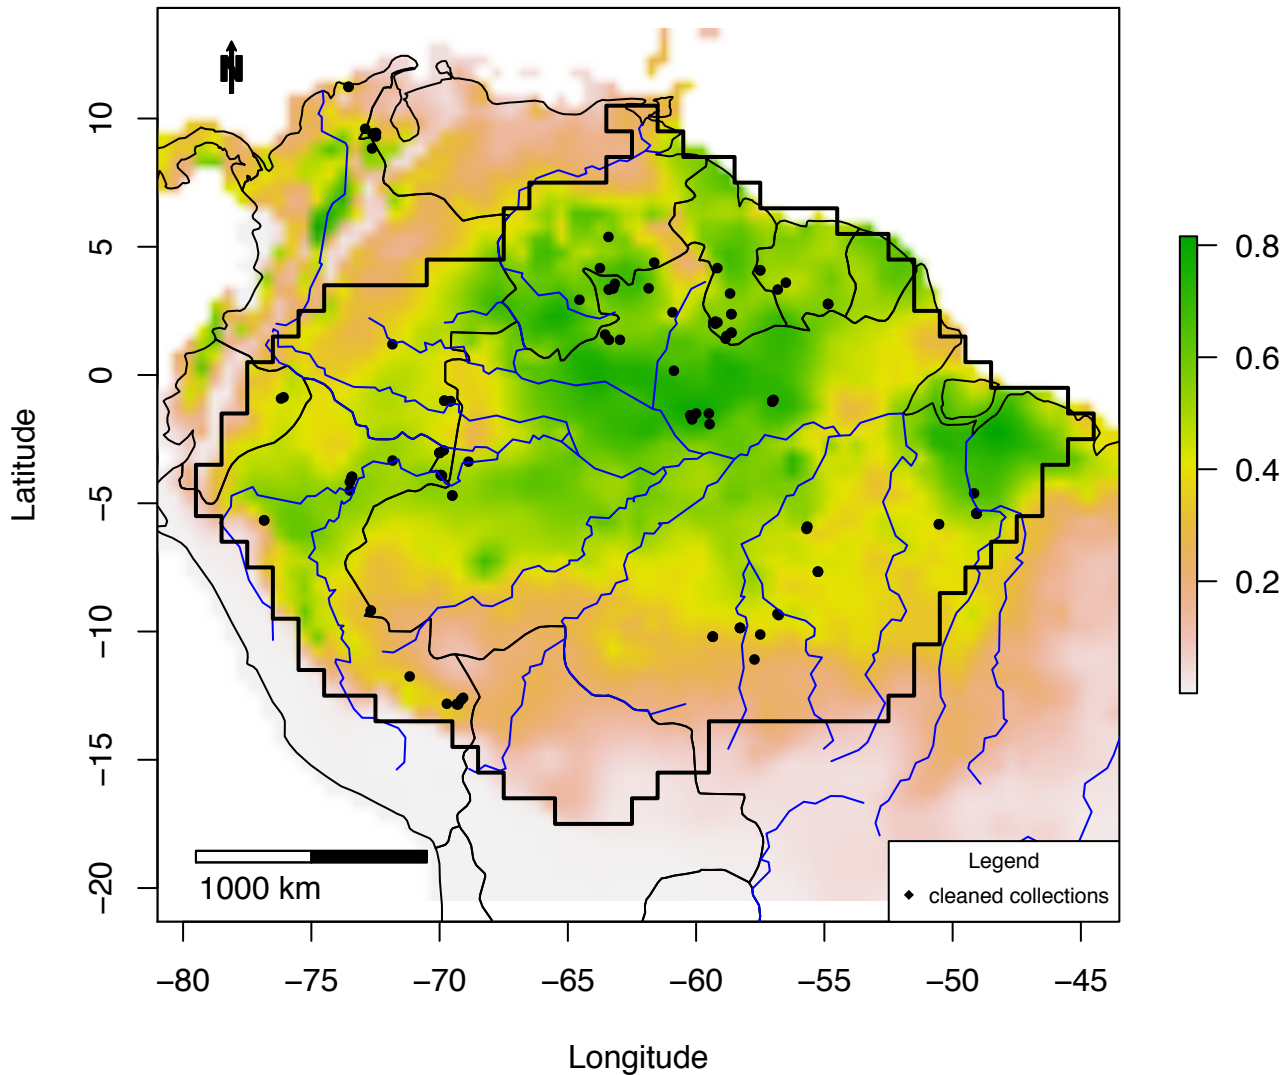

Figure S3\_145C IDW map of *Sagotia brachysepala*:  
plots = 0 – 0.27; IDW: 0 – 0.19

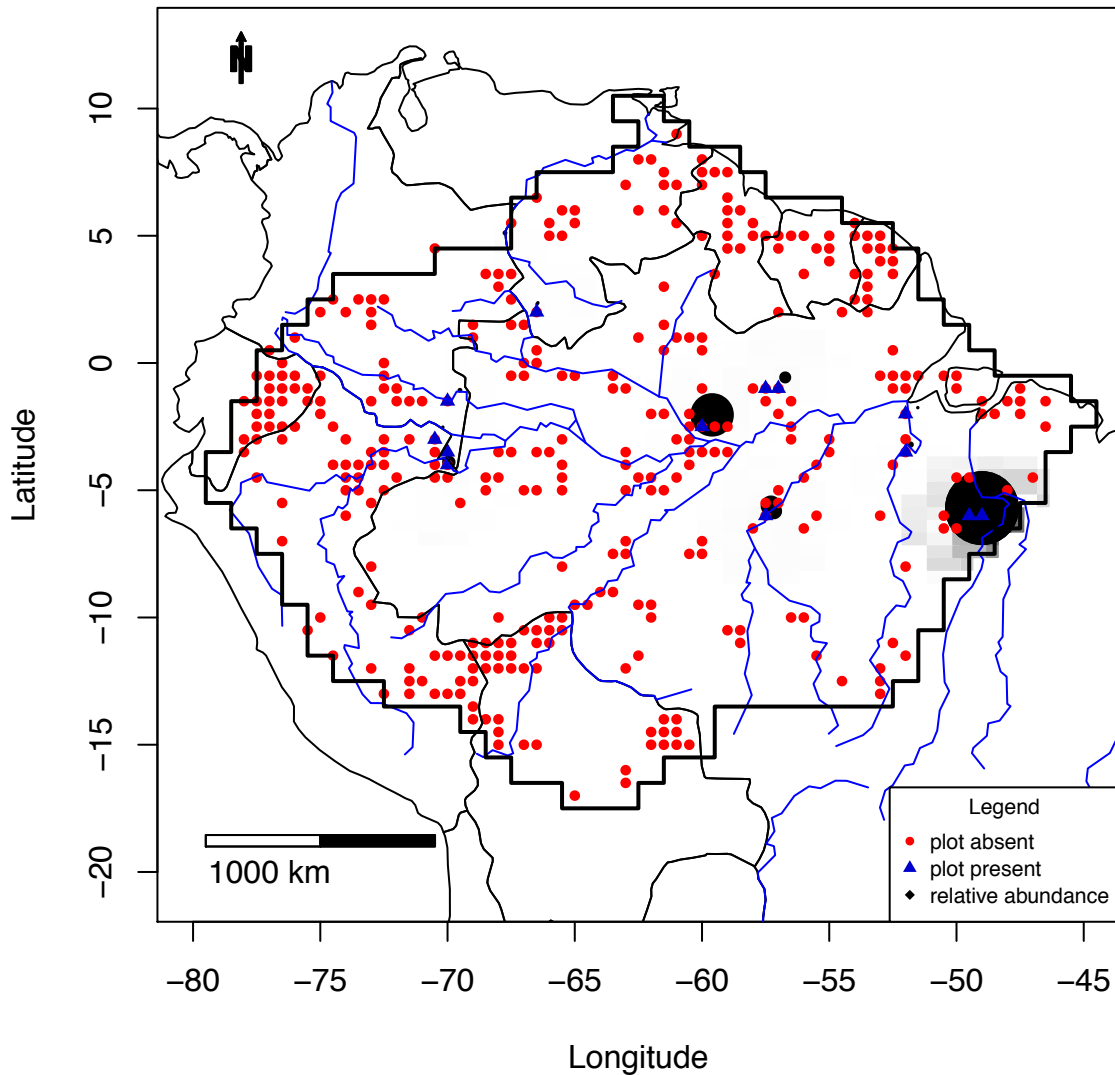

Figure S3\_146A Combined map of *Sagotia racemosa*

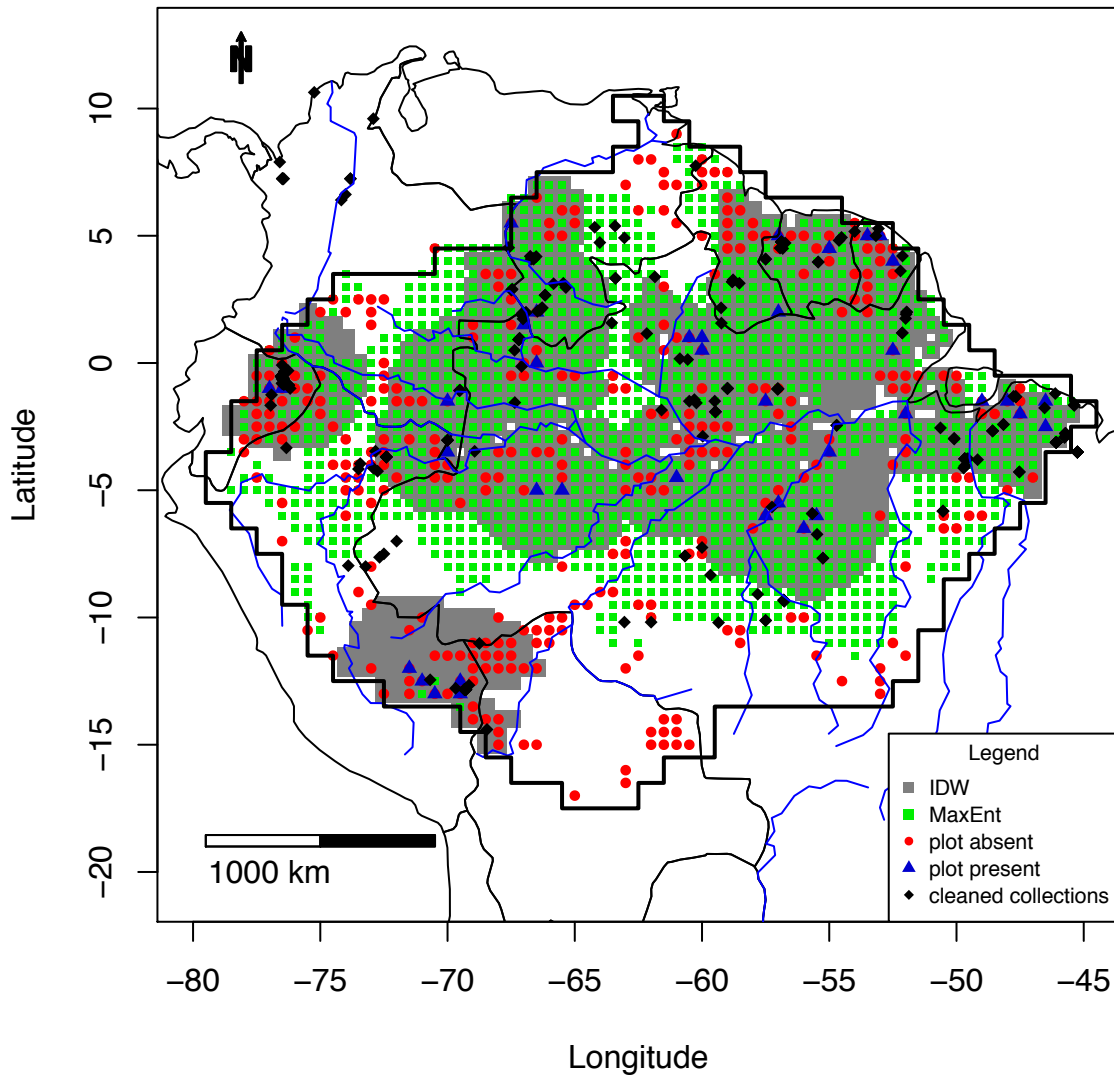

Figure S3\_146B MaxEnt map of *Sagotia racemosa*

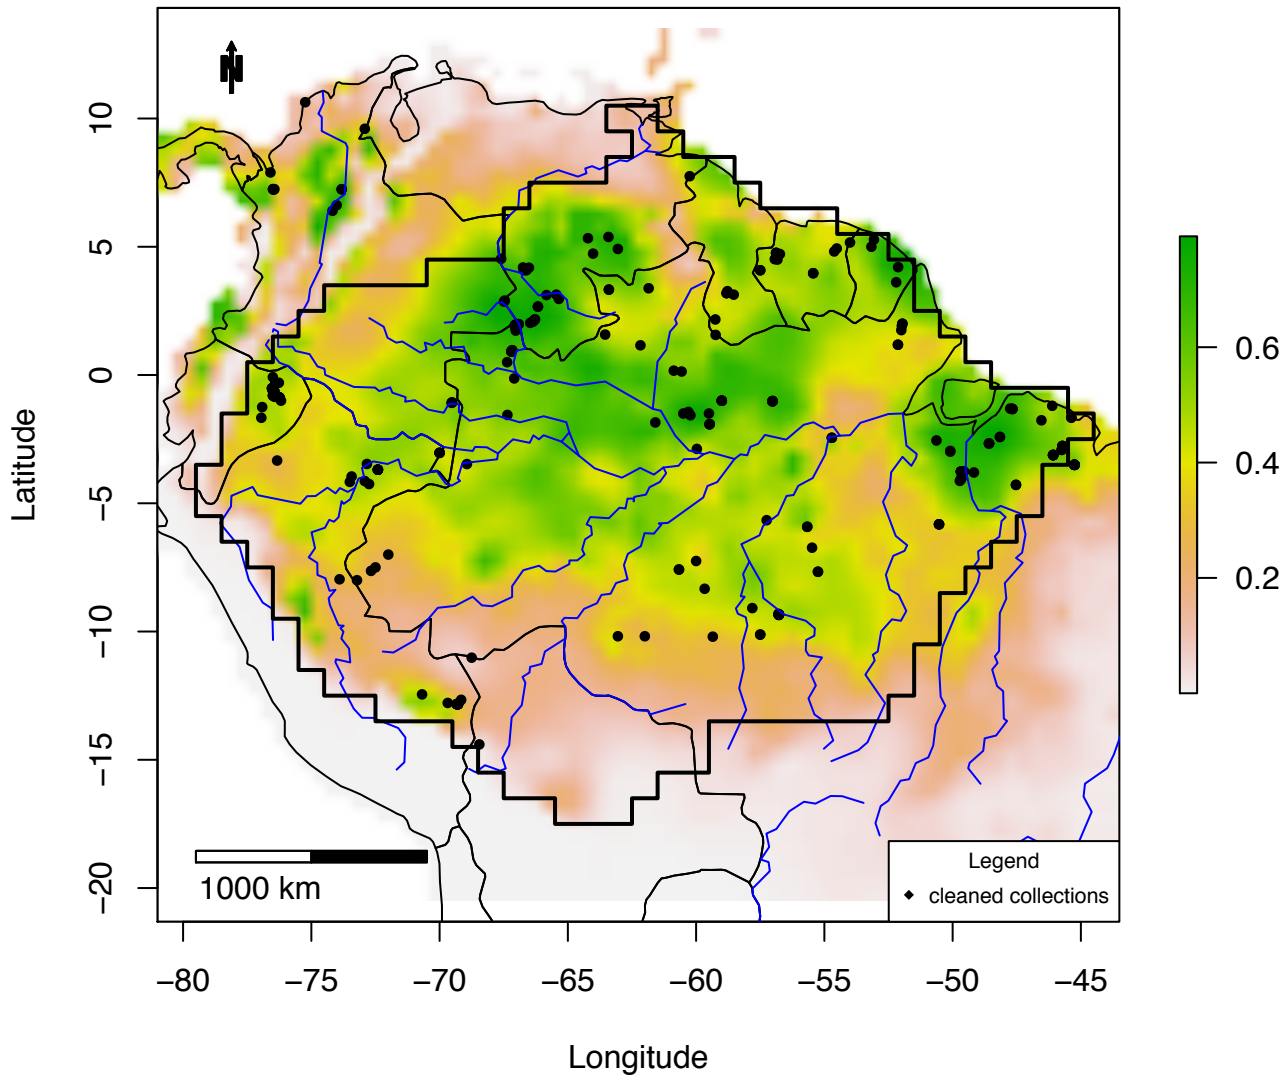

Figure S3\_146C IDW map of *Sagotia racemosa*:  
plots =0 – 0.13; IDW: 0 – 0.07

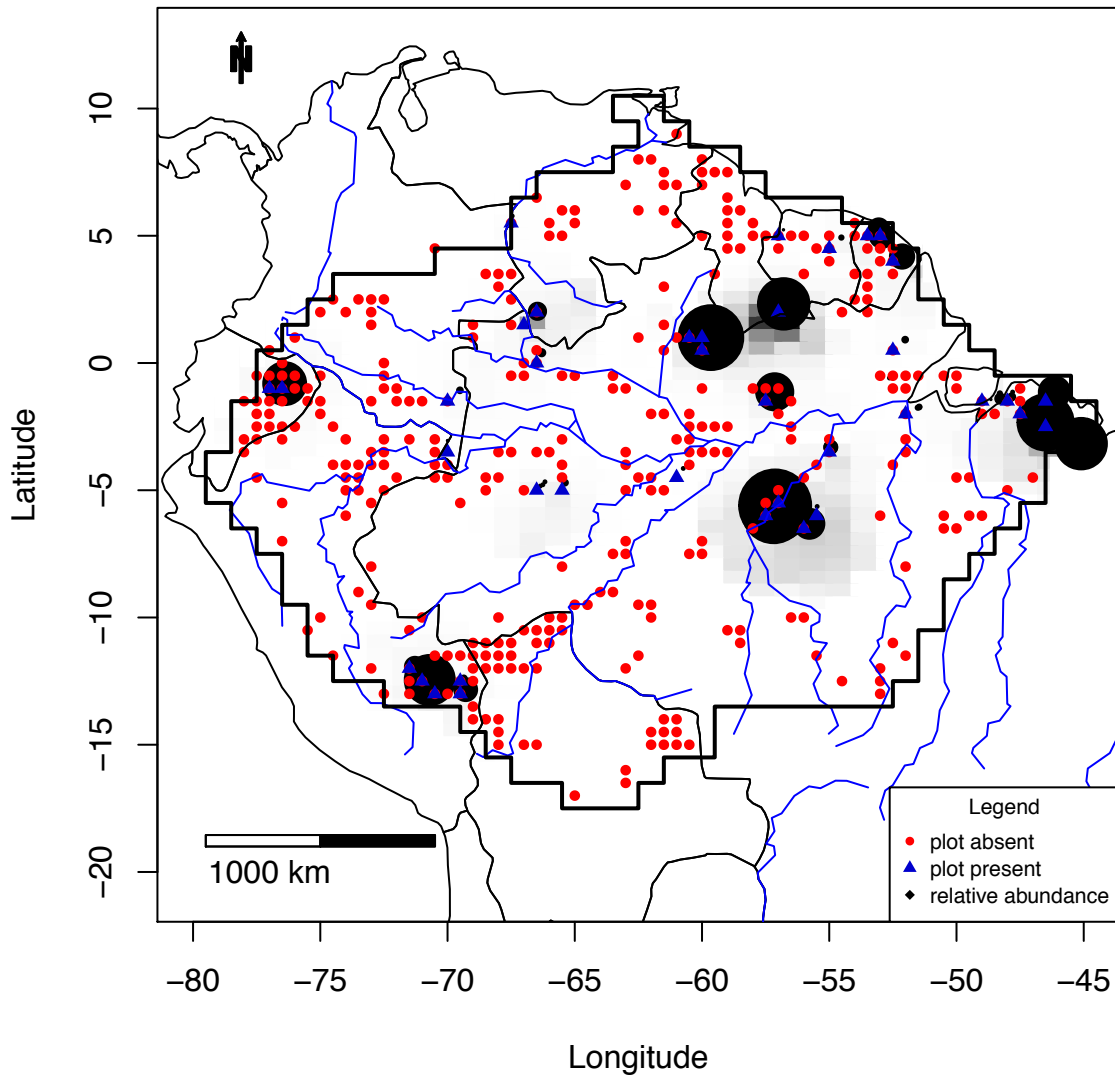

Figure S3\_147A Combined map of *Scleronema\_micranthum*

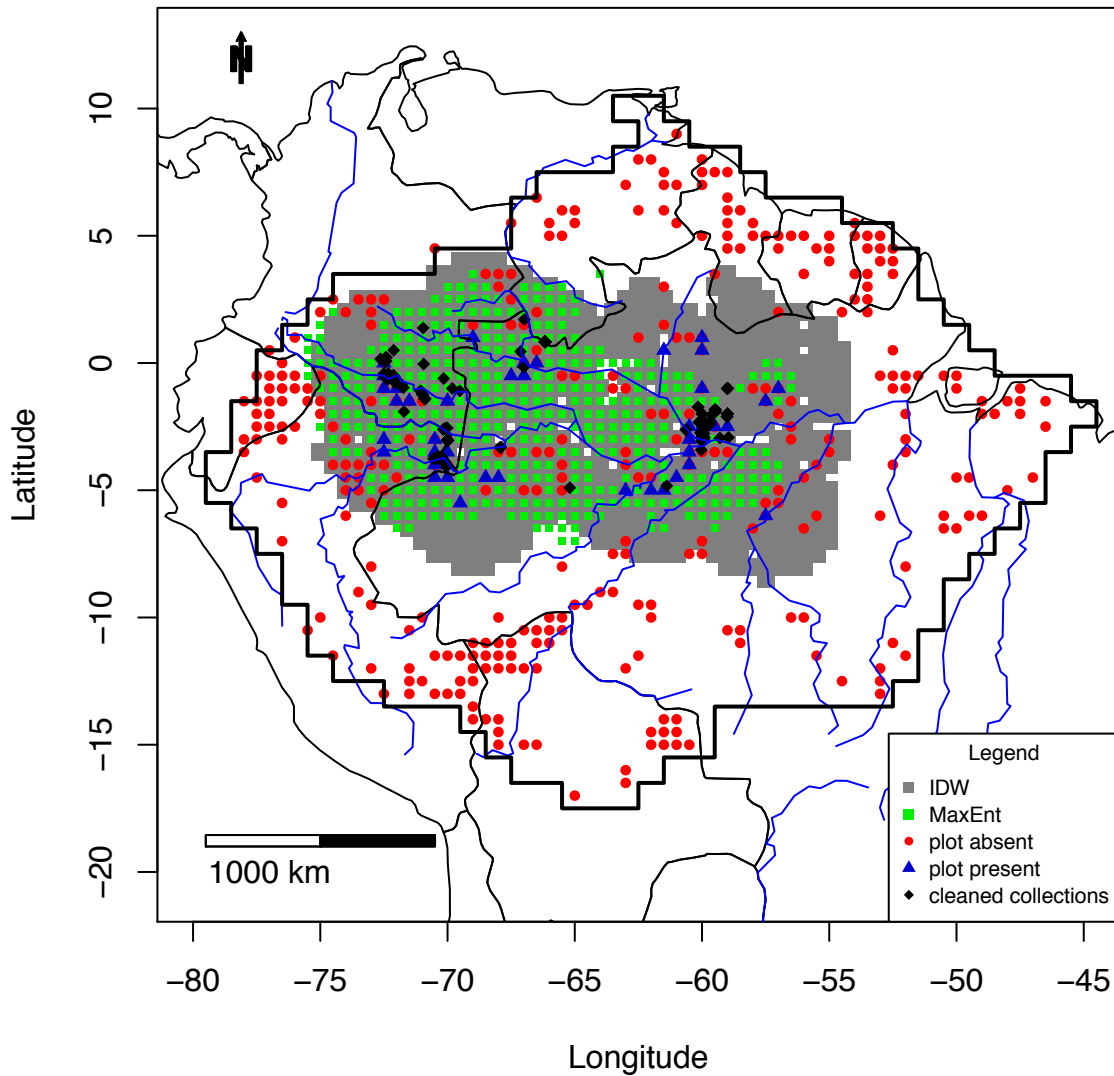



Figure S3\_147B MaxEnt map of *Scleronema\_micranthum*

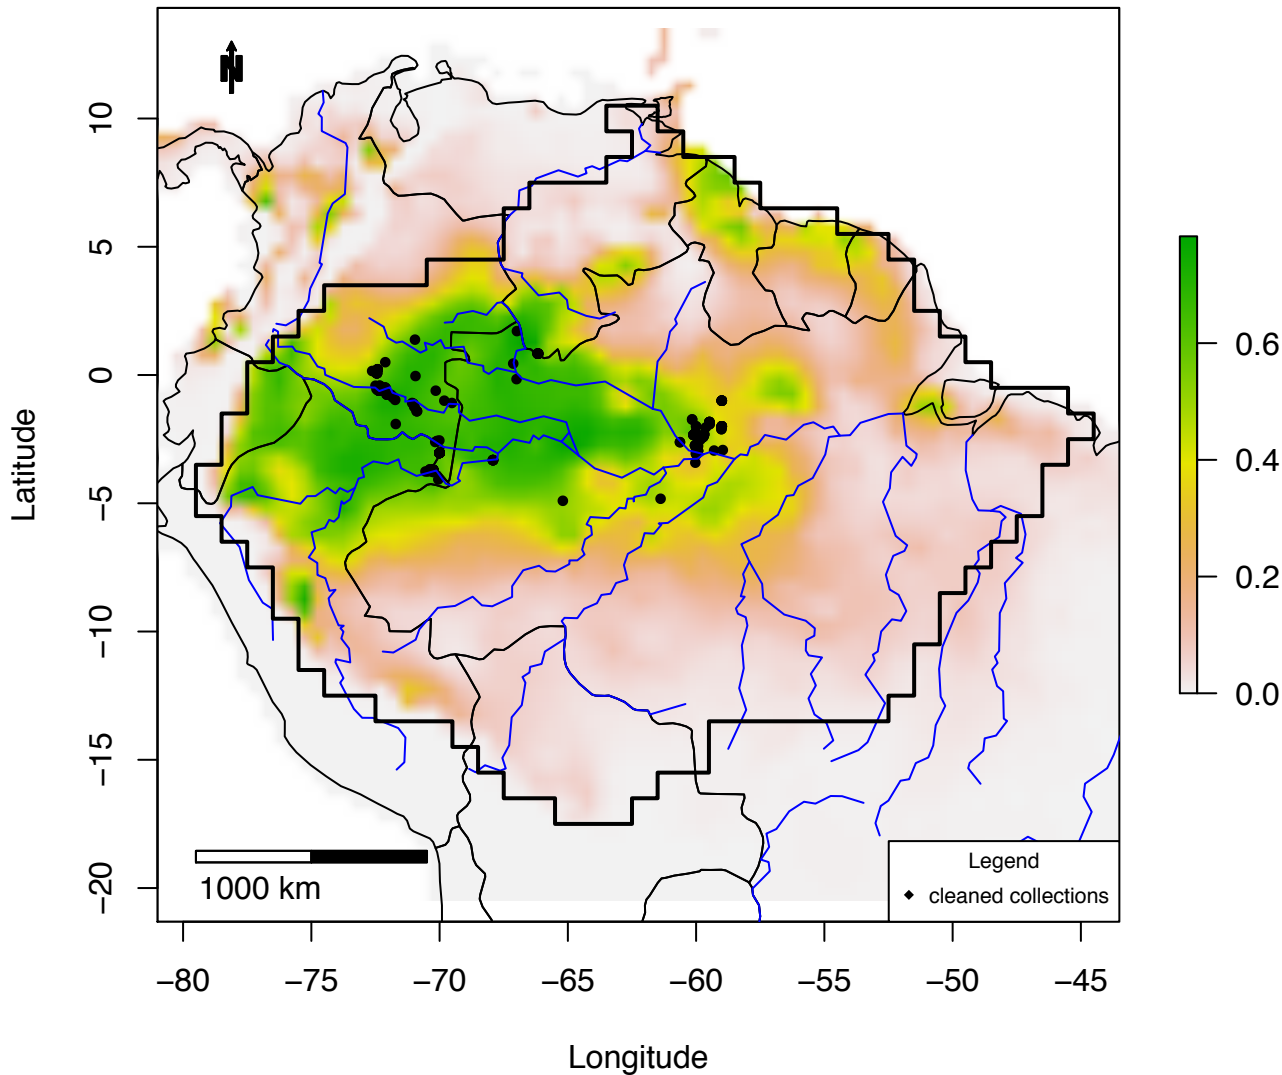

Figure S3\_147C IDW map of *Scleronema\_micranthum*:  
plots =0 – 0.08; IDW: 0 – 0.02

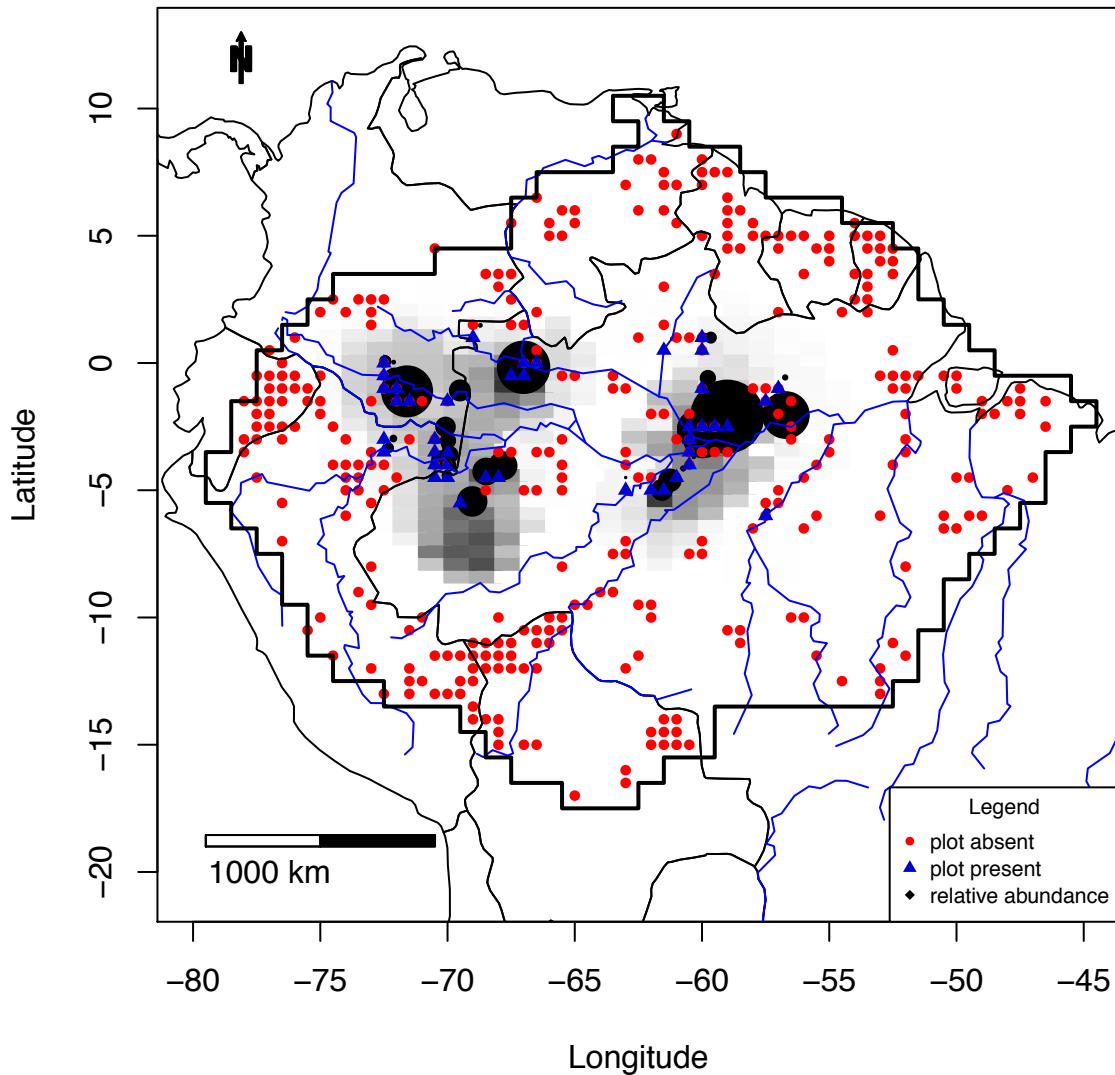

Figure S3\_148A Combined map of *Senefeldera\_inclinata*

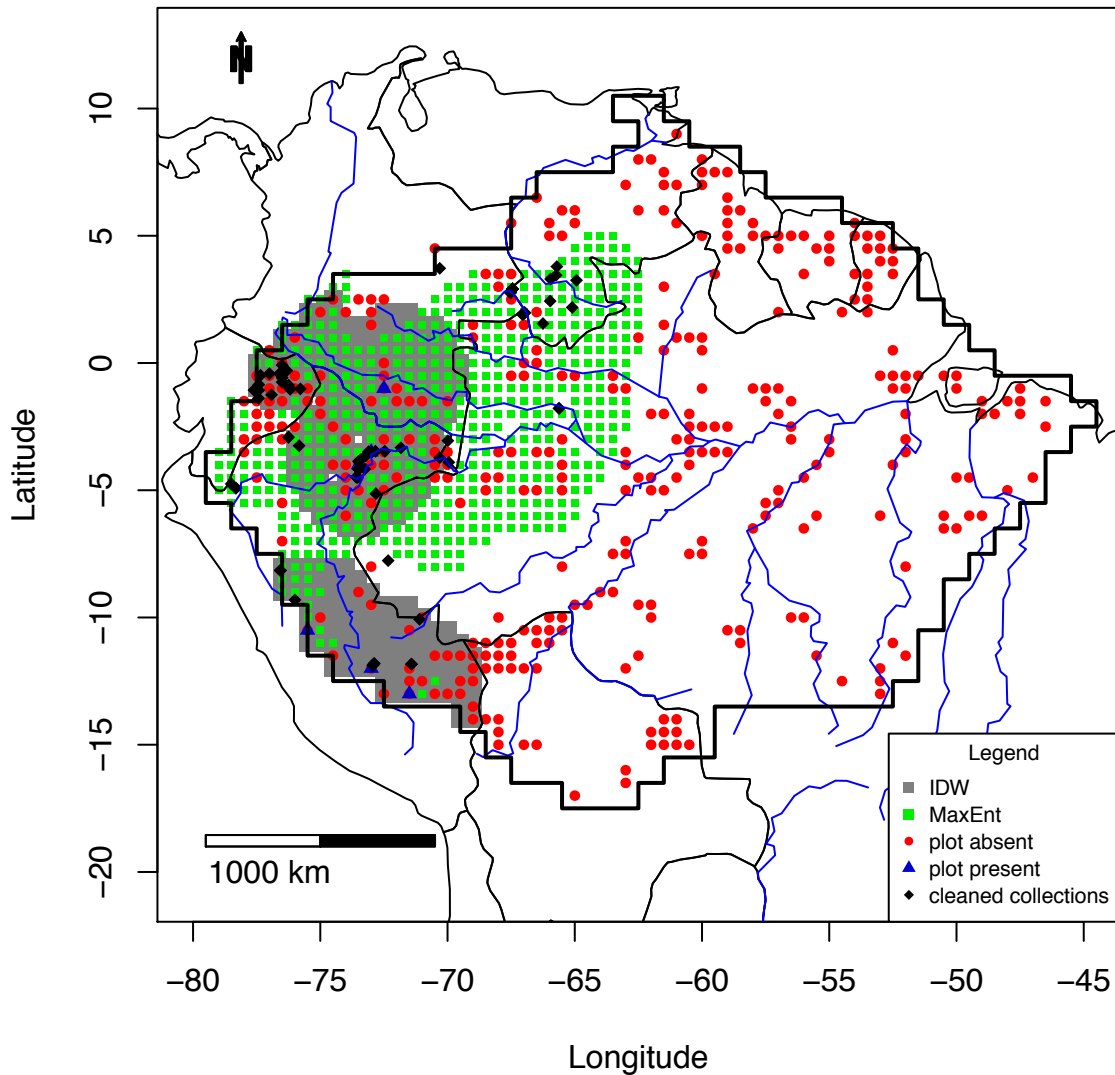

Figure S3\_148B MaxEnt map of *Senefeldera\_inclinata*

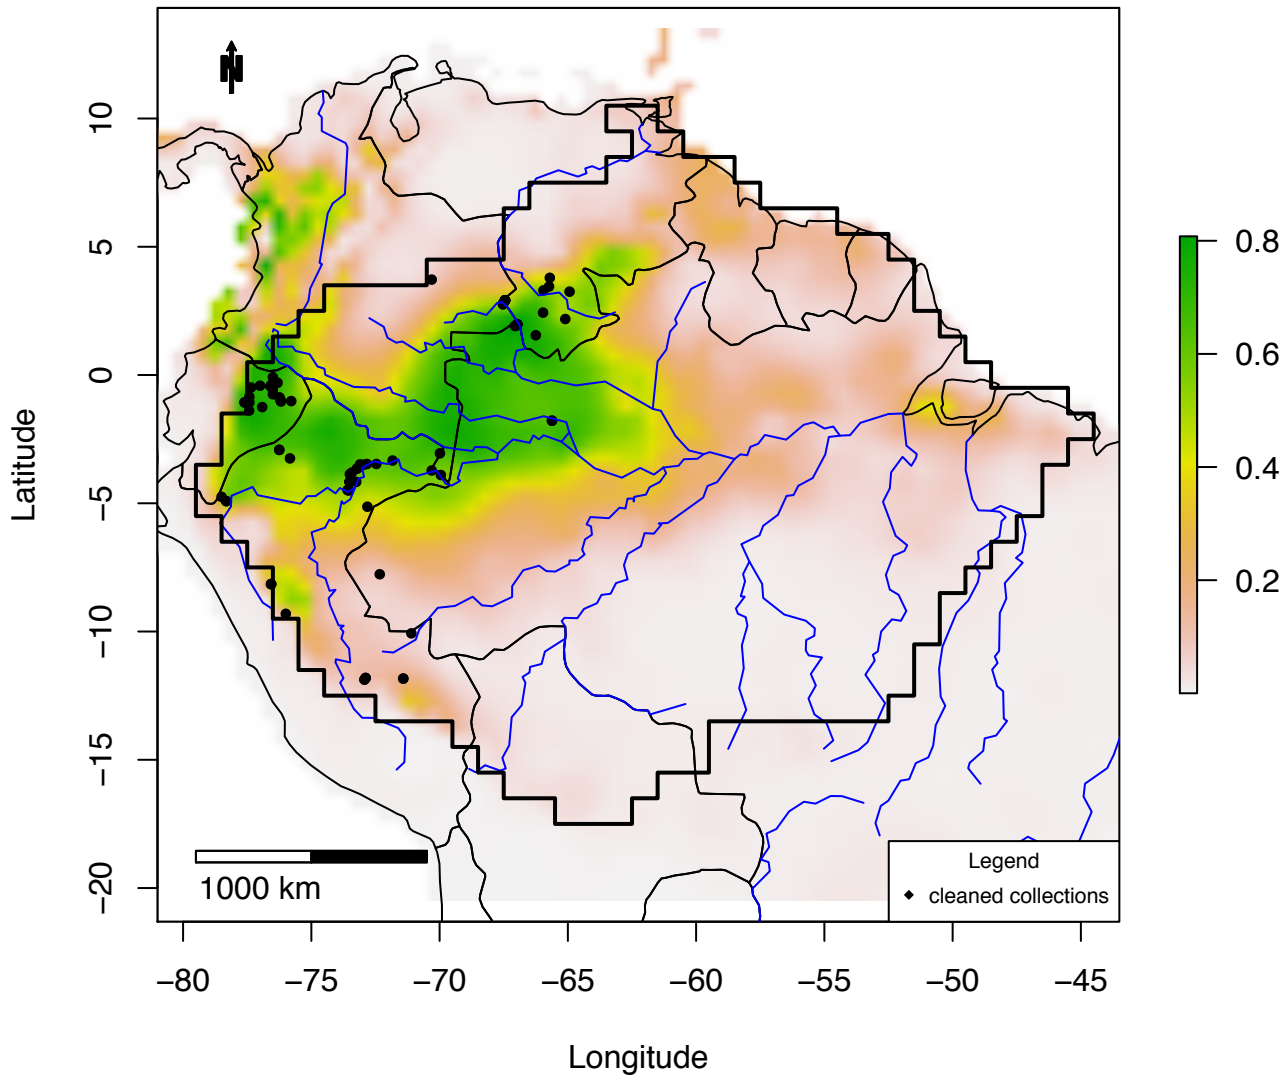

**Figure S3\_148C IDW map of *Senefeldera\_inclinata*:**  
plots =0 – 0.54; IDW: 0 – 0.15

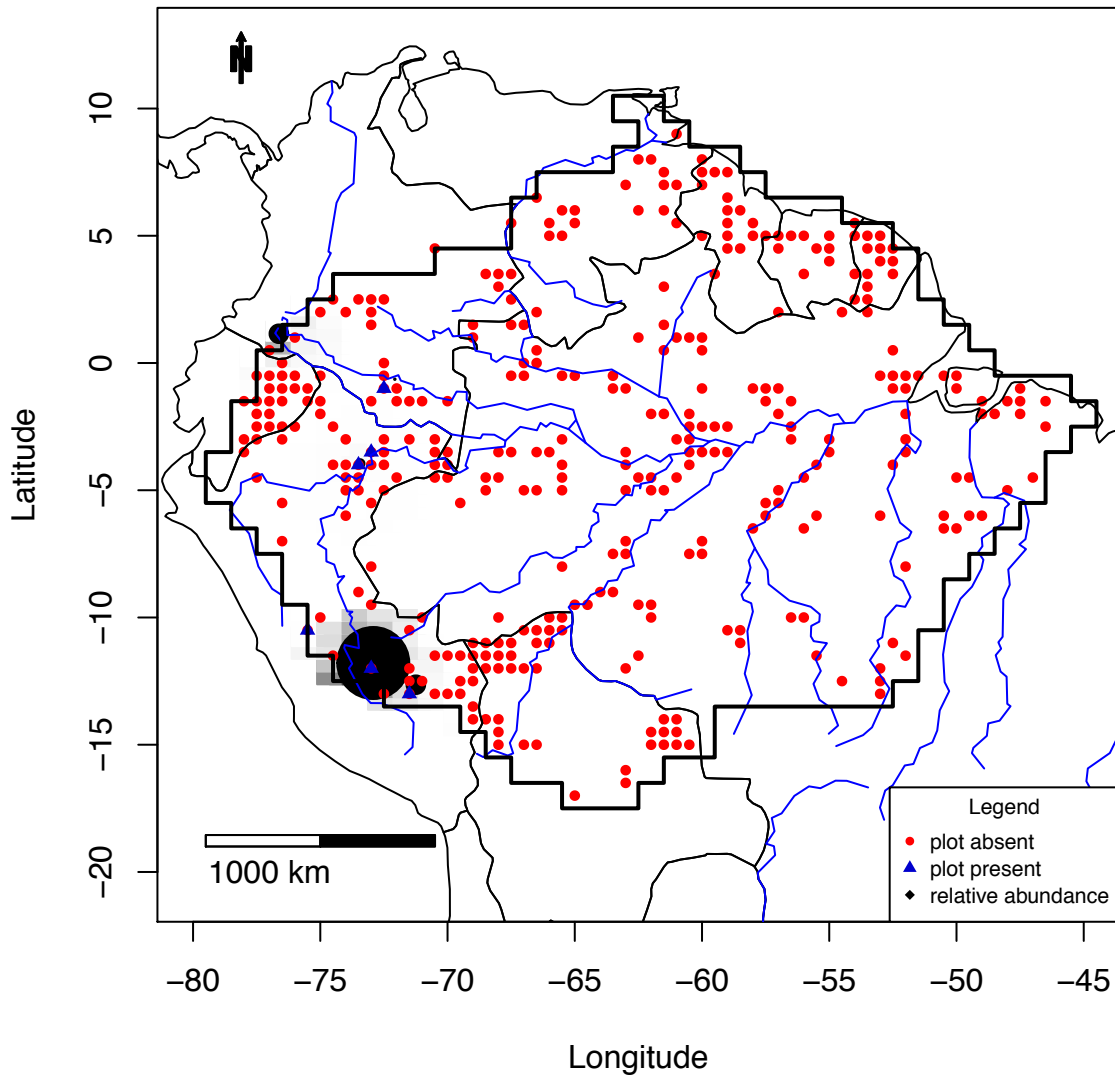

Figure S3\_149A Combined map of *Siparuna decipiens*

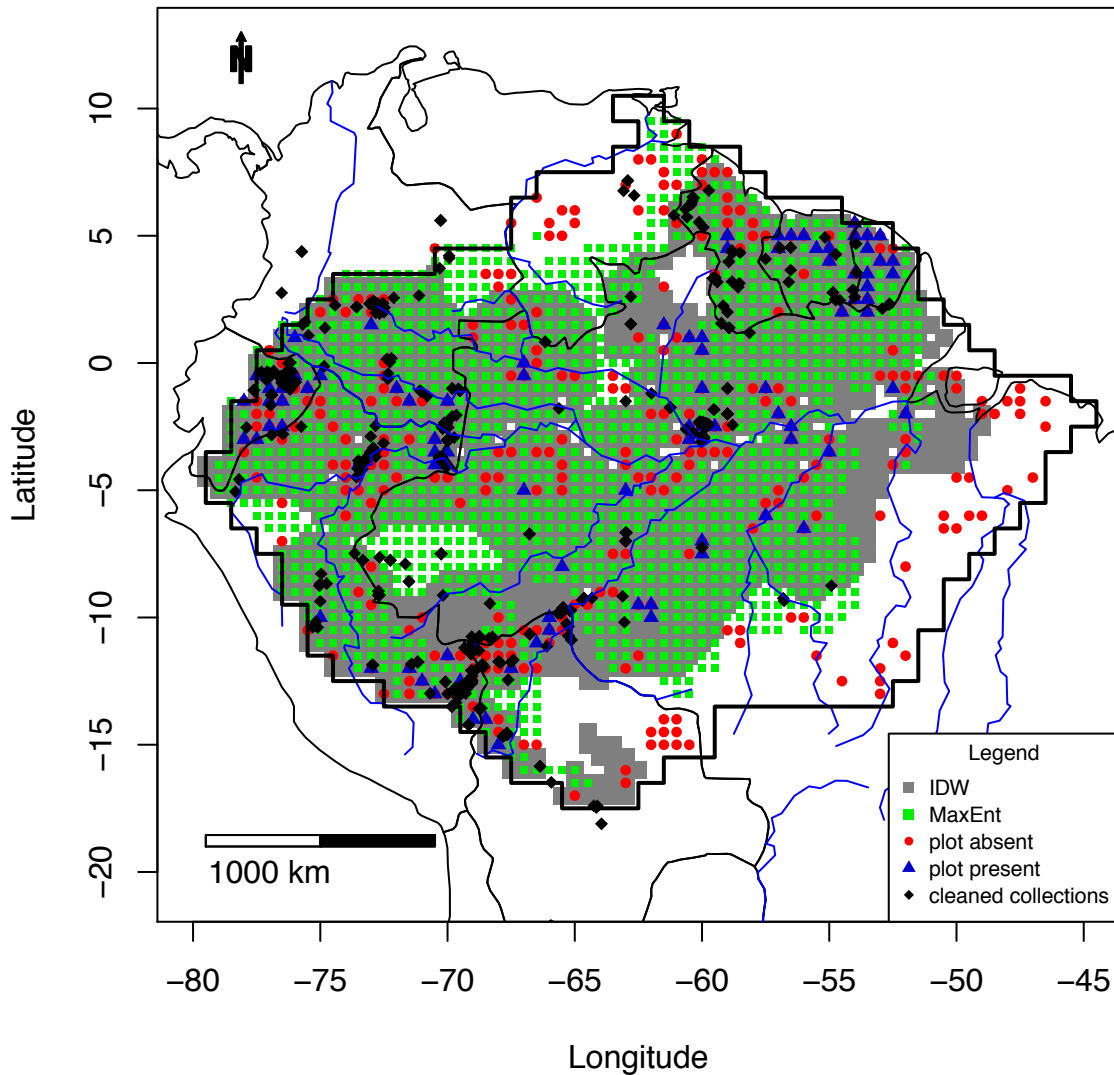

Figure S3\_149B MaxEnt map of *Siparuna\_decipiens*

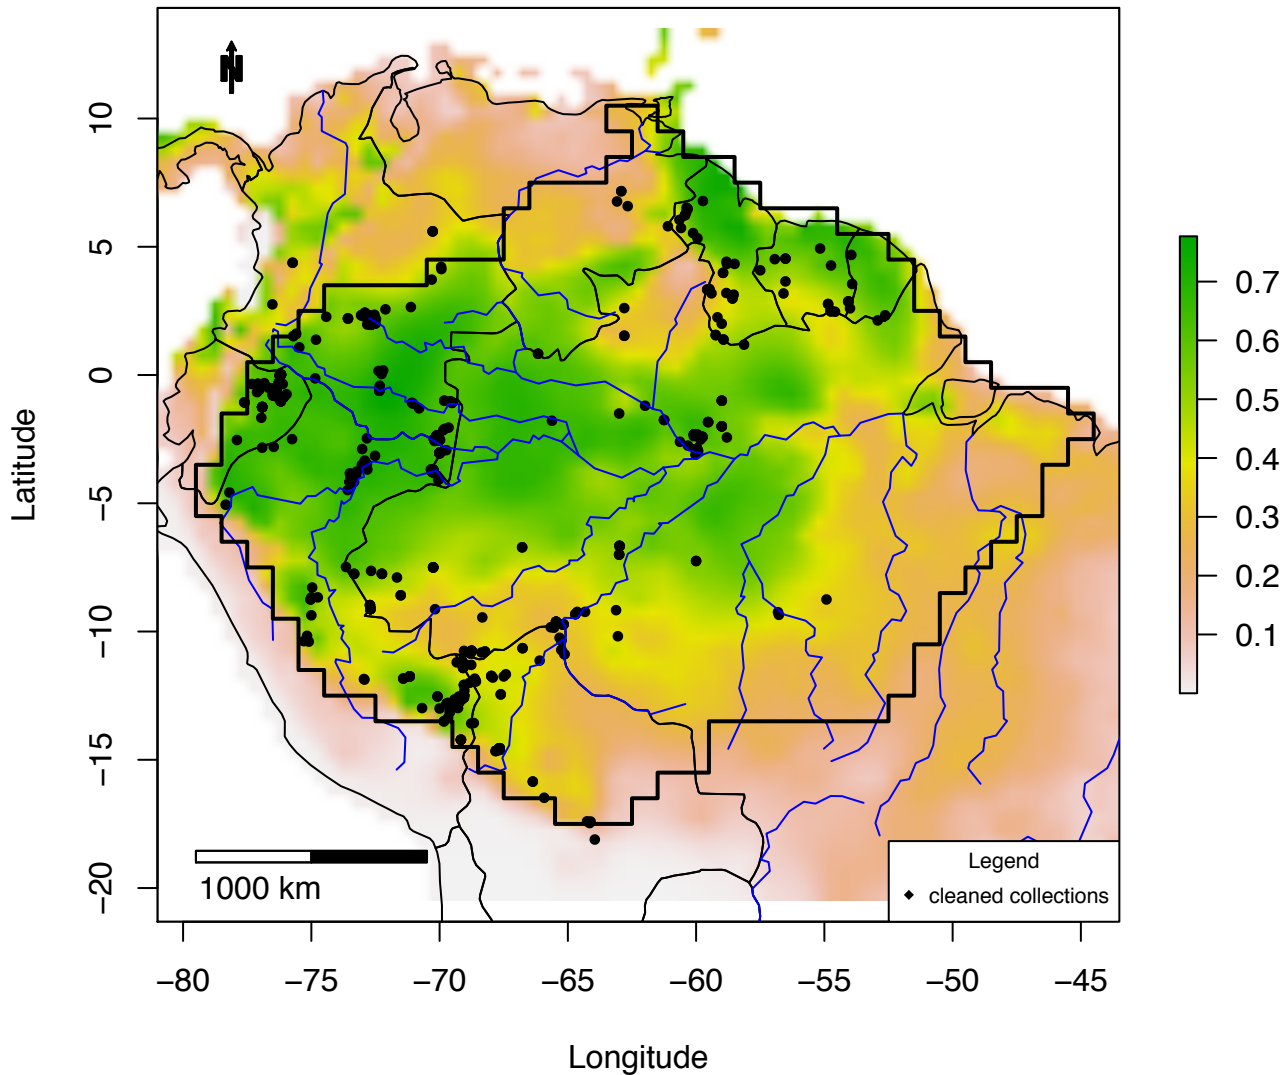

**Figure S3\_149C IDW map of *Siparuna decipiens*:**  
**plots =0 – 0.1; IDW: 0 – 0.07**

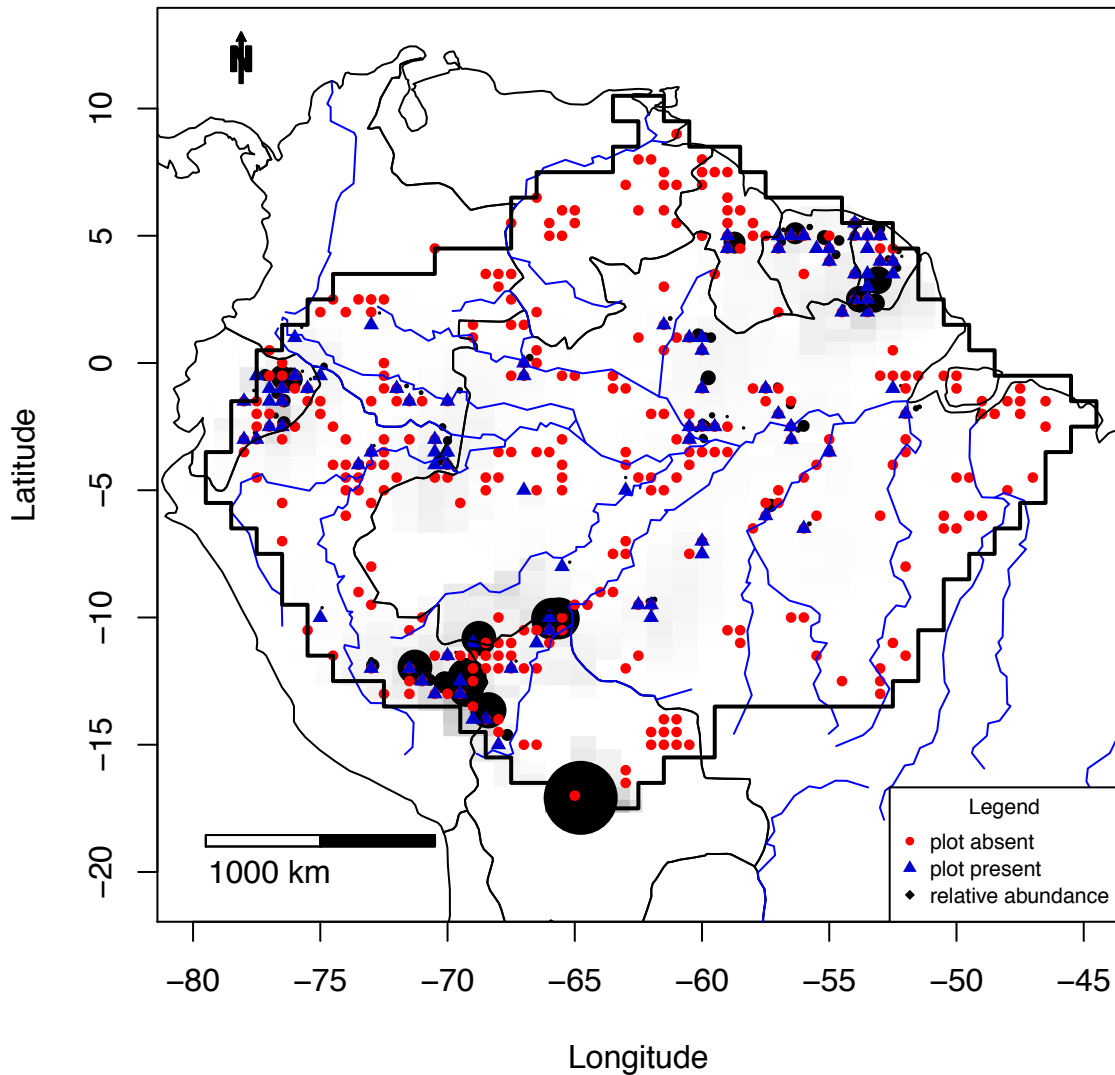



Figure S3\_150A Combined map of *Socratea\_exorrhiza*

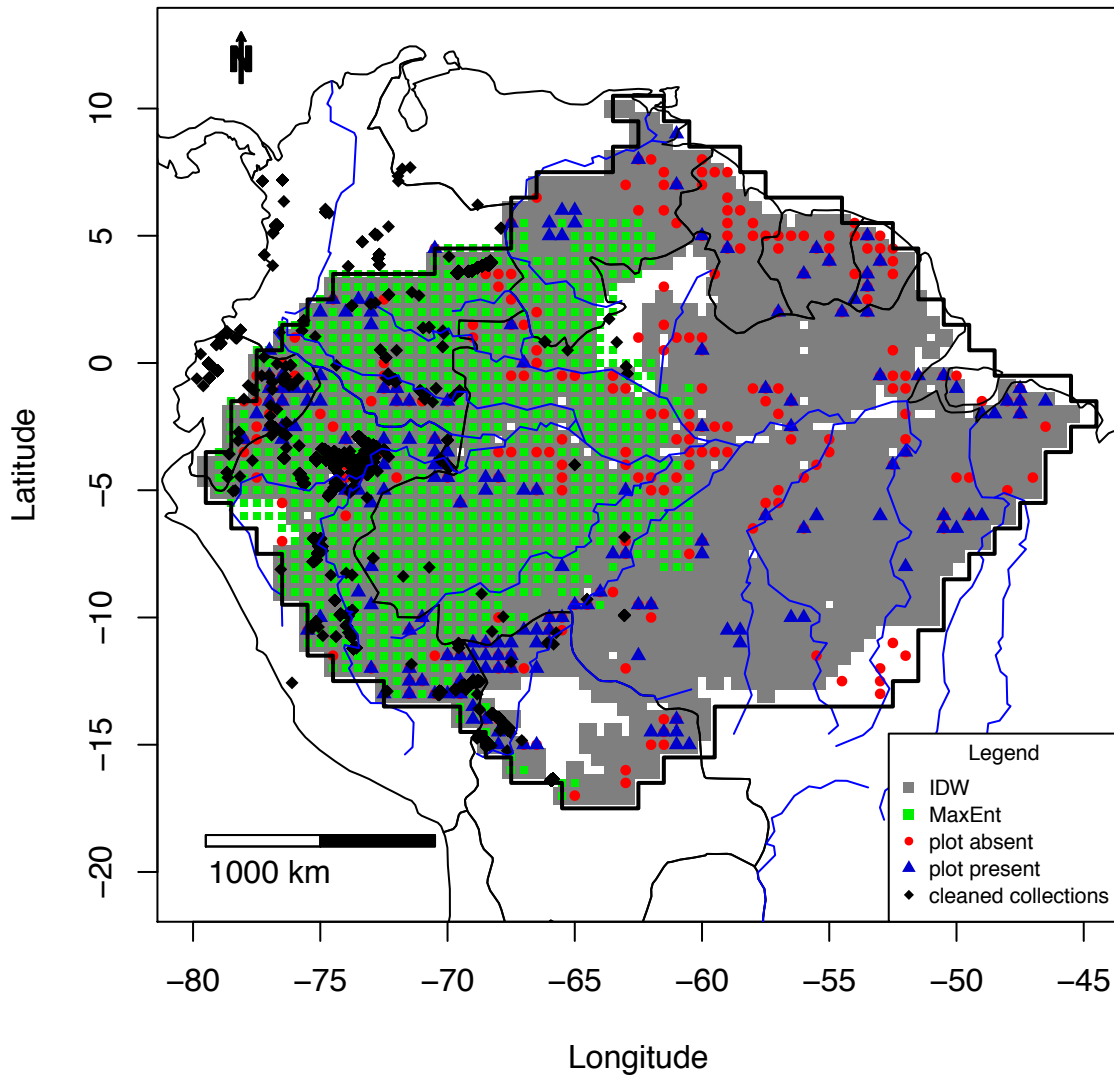

Figure S3\_150B MaxEnt map of *Socratea\_exorrhiza*

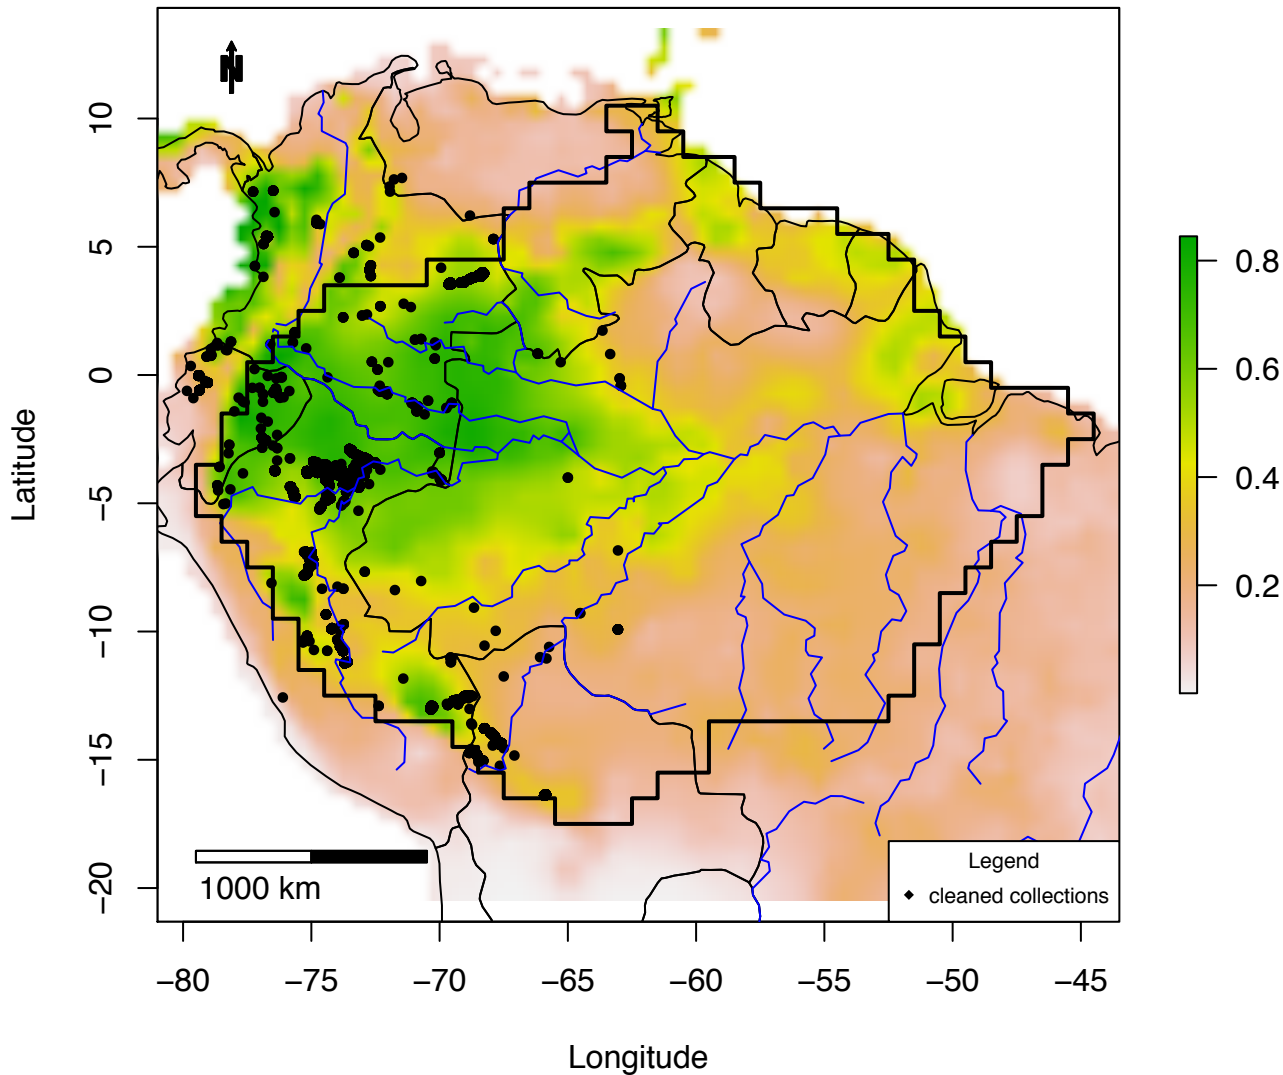

**Figure S3\_150C IDW map of *Socratea\_exorrhiza*:**  
plots =0 – 0.31; IDW: 0 – 0.16

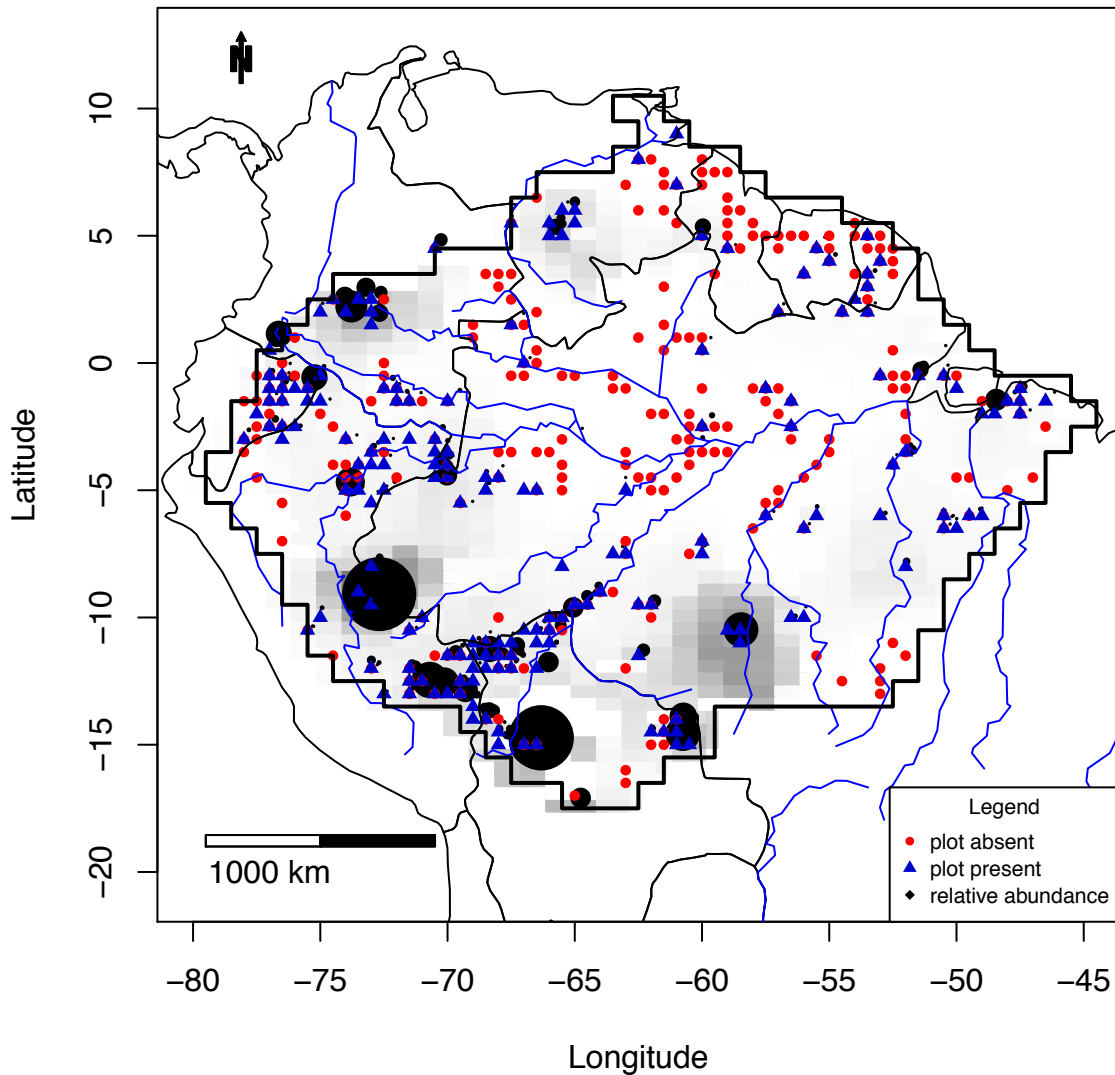

Figure S3\_151A Combined map of *Sterculia\_purriens*

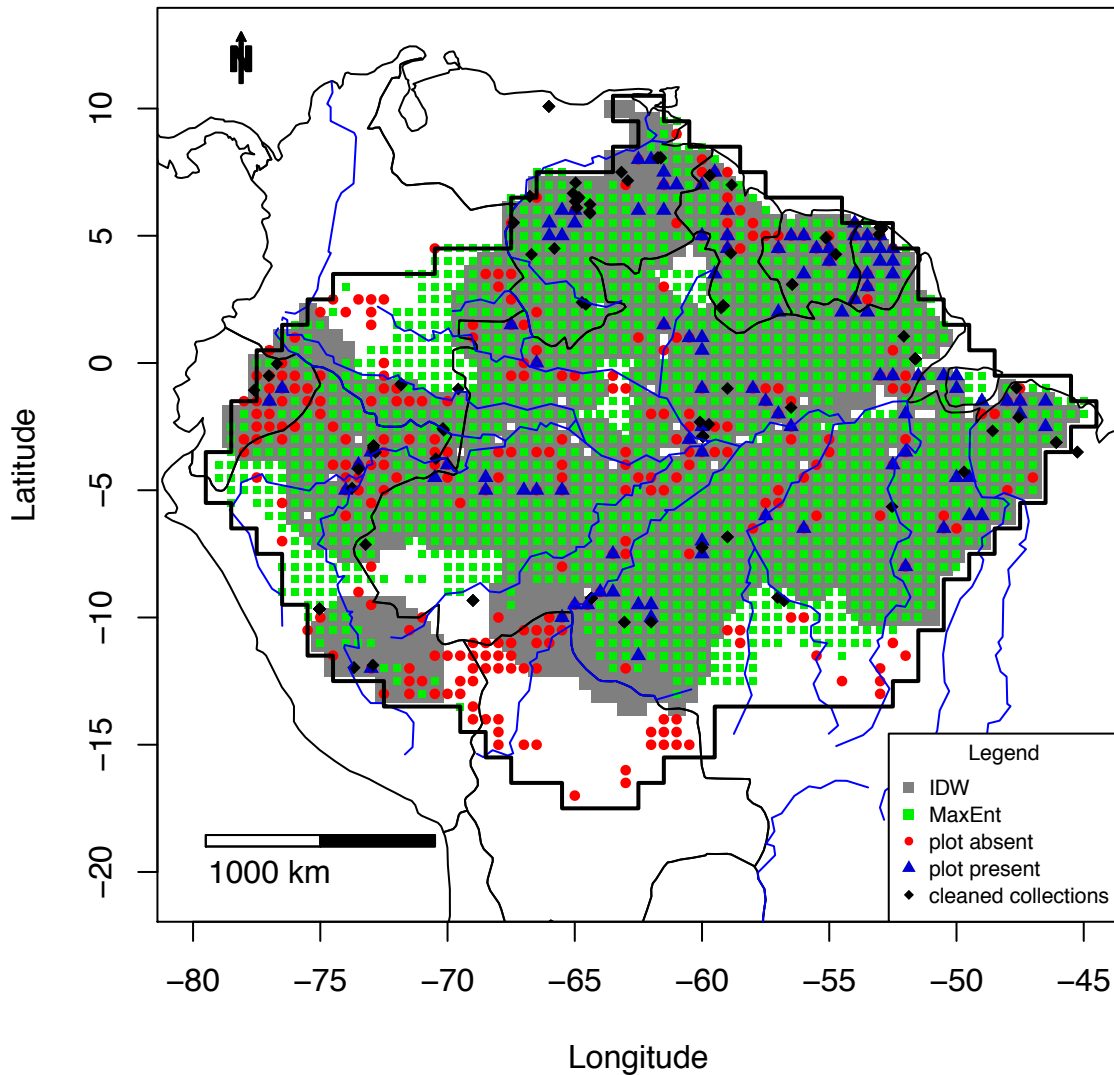

Figure S3\_151B MaxEnt map of *Sterculia pruriens*

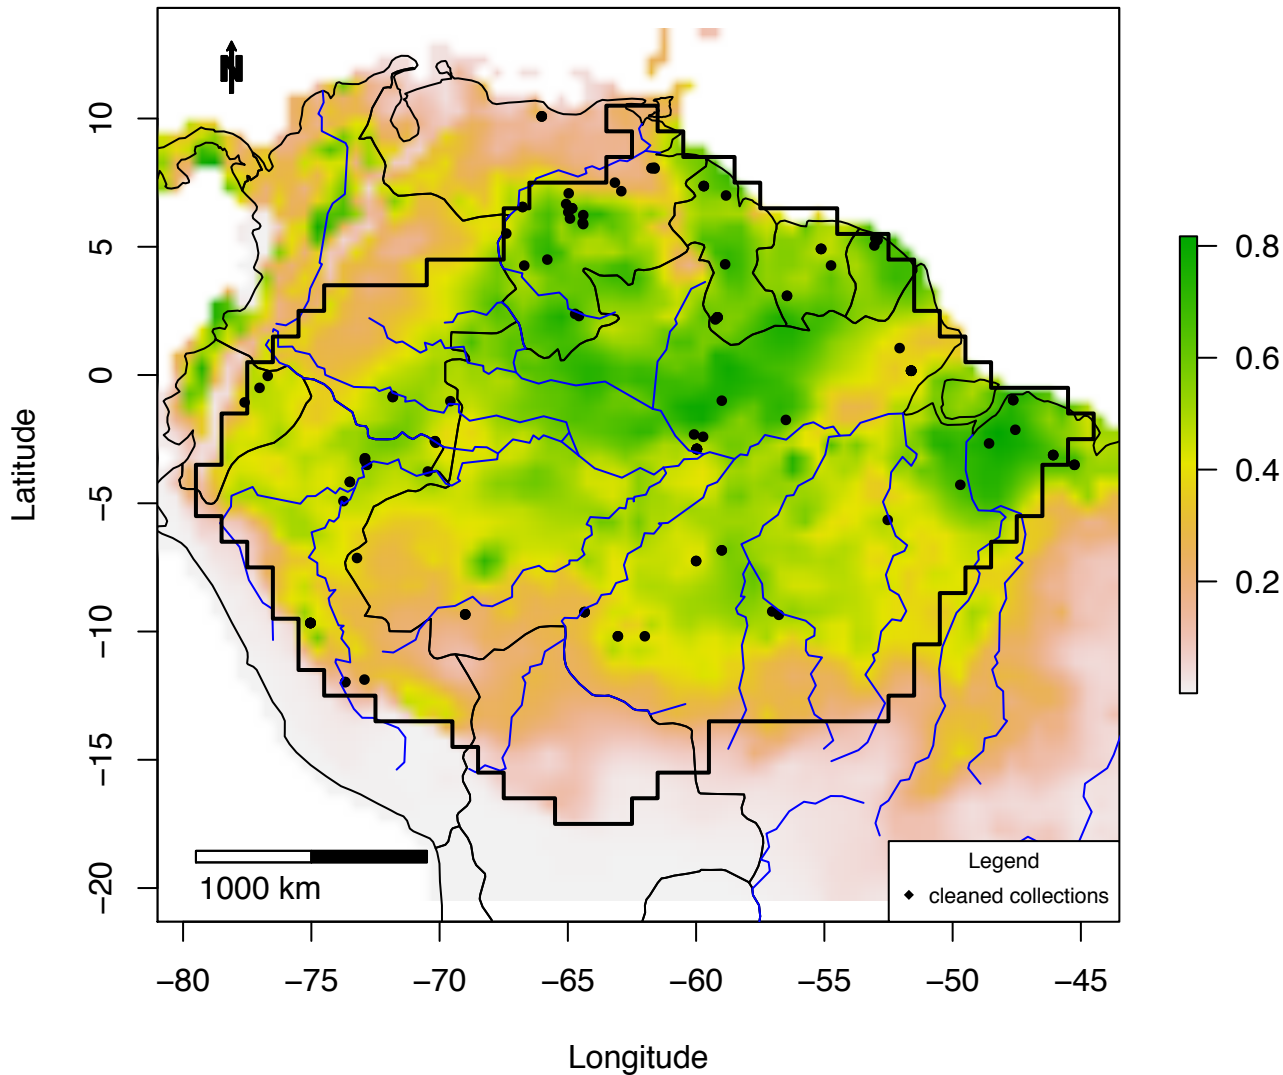

Figure S3\_151C IDW map of *Sterculia pruriens*:  
plots = 0 – 0.06; IDW: 0 – 0.03

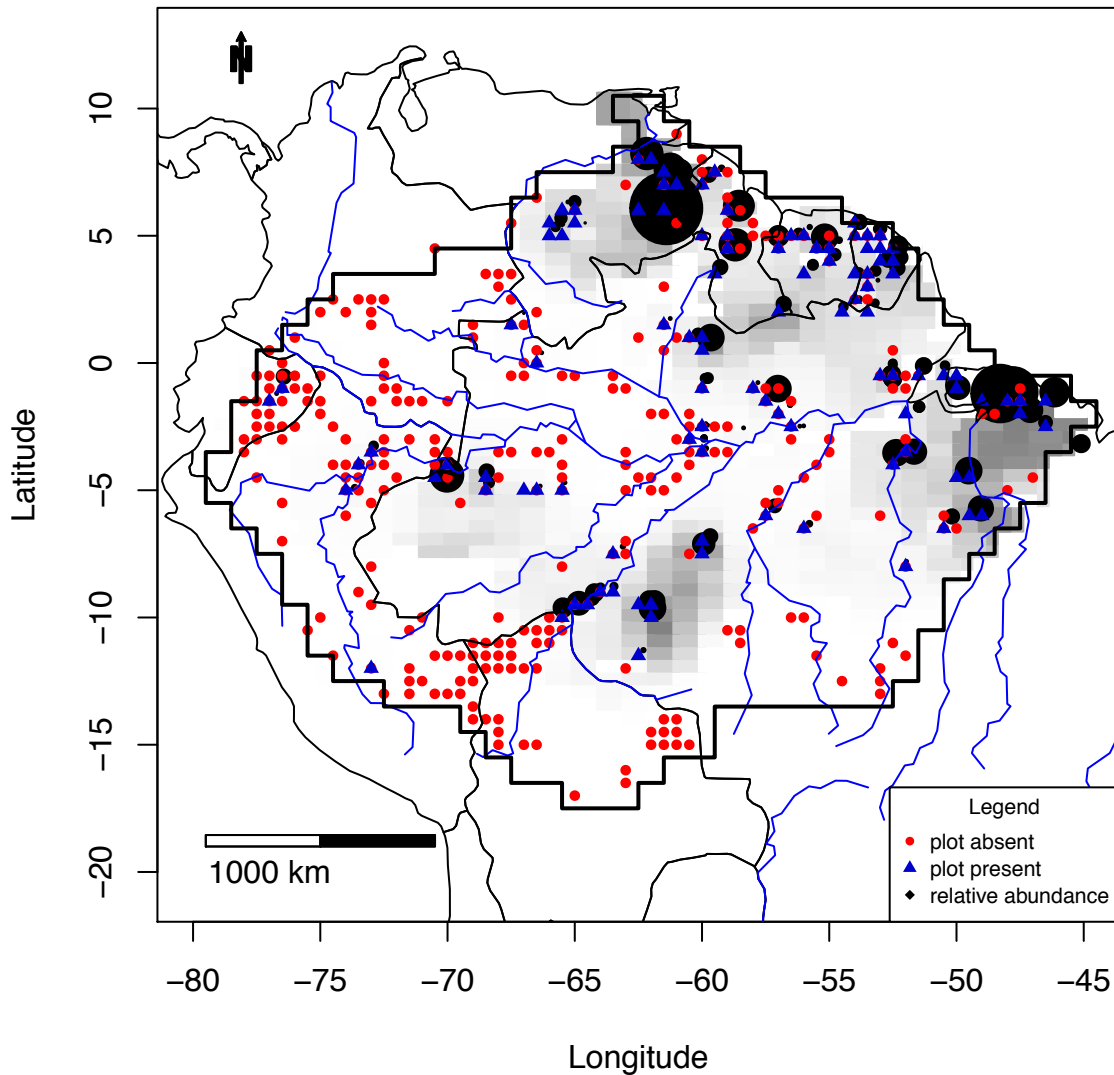

Figure S3\_152A Combined map of *Swartzia\_polyphylla*

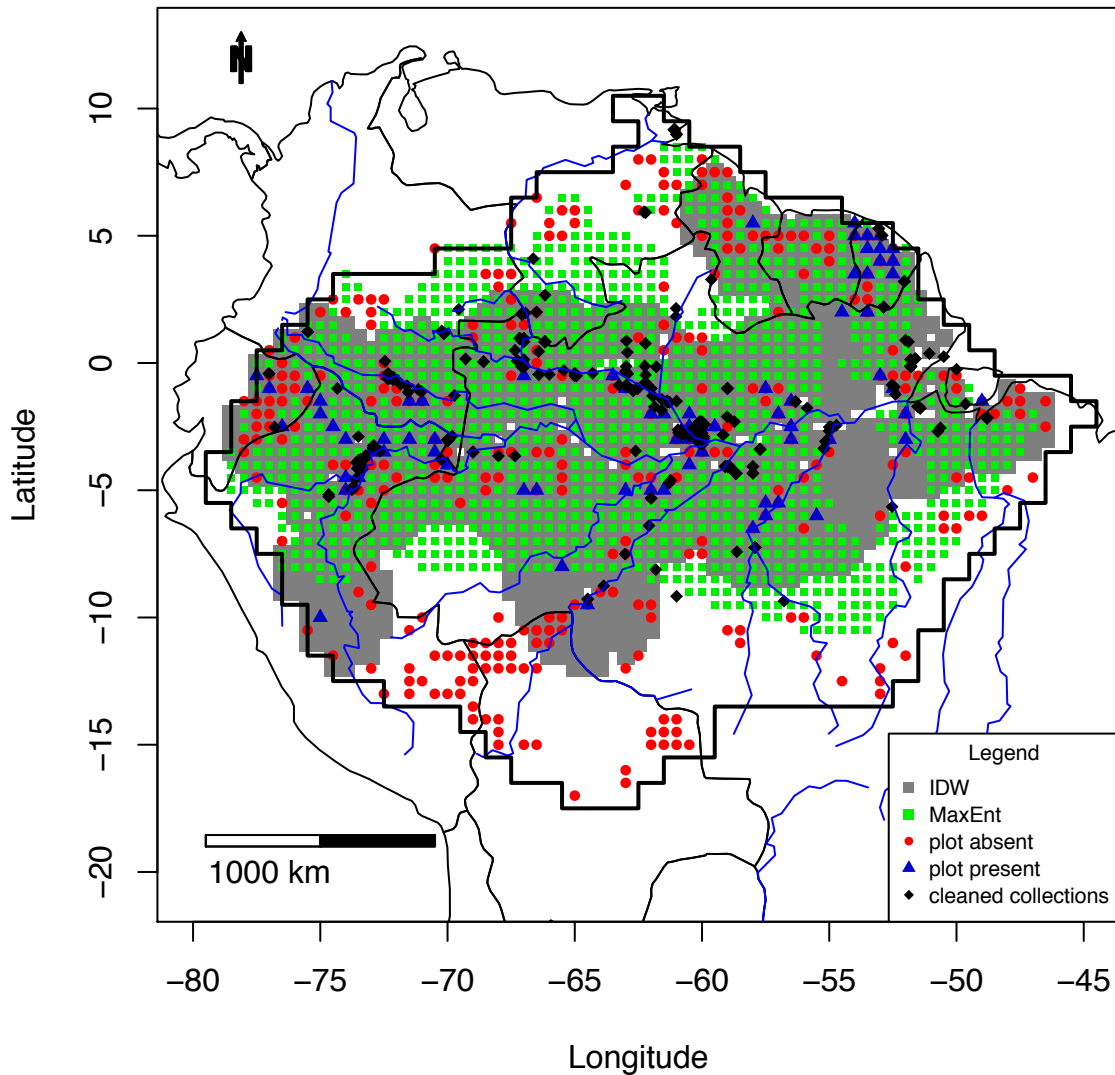

Figure S3\_152B MaxEnt map of *Swartzia polyphylla*

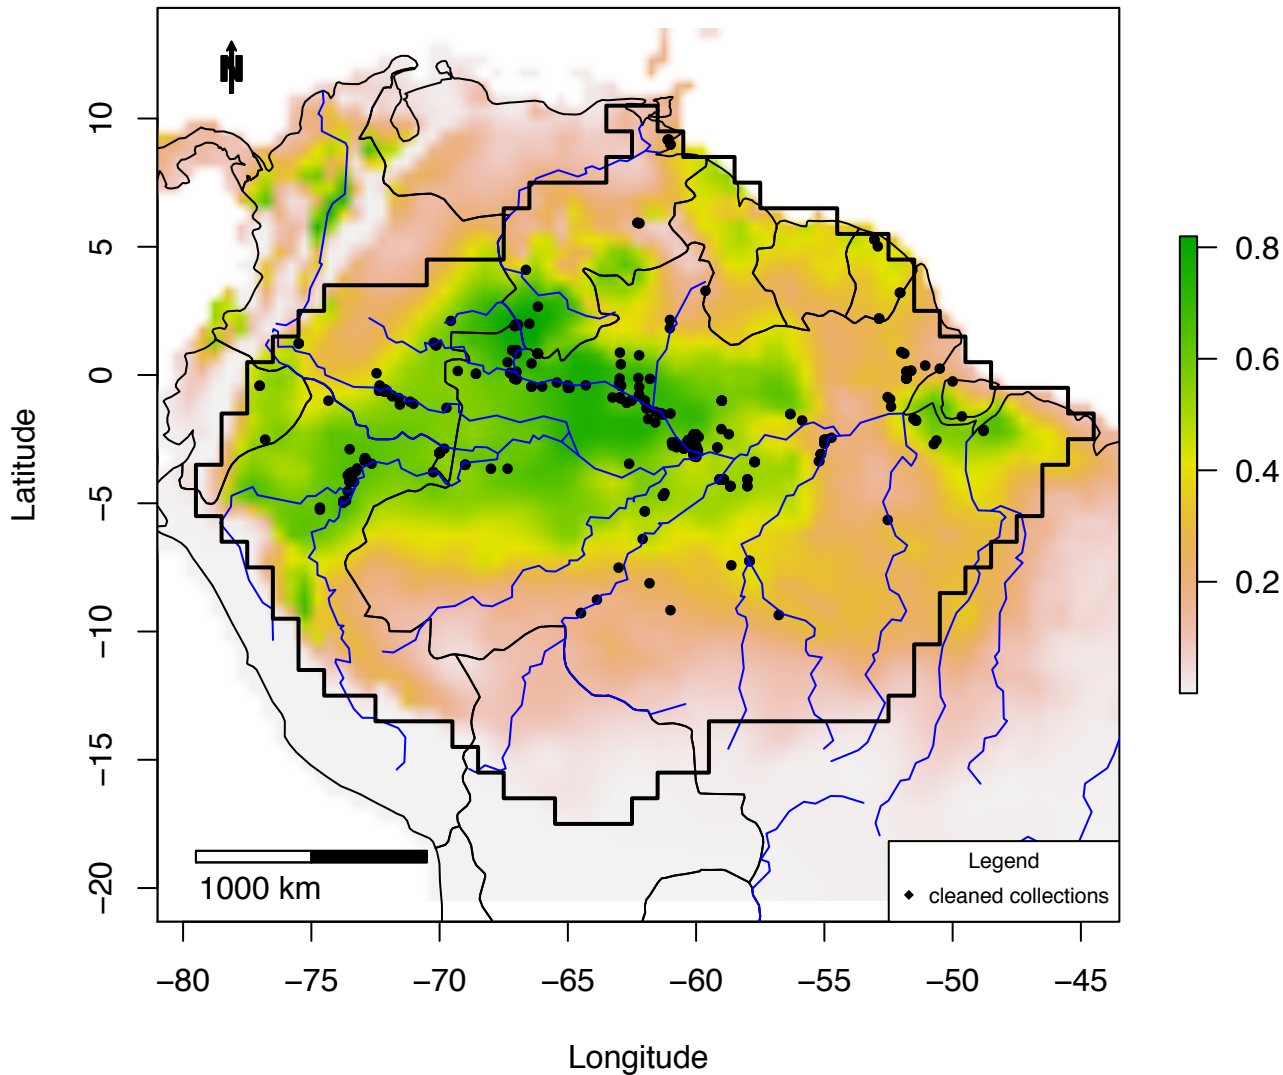



Figure S3\_152C IDW map of *Swartzia polyphylla*:  
plots =0 – 0.15; IDW: 0 – 0.04

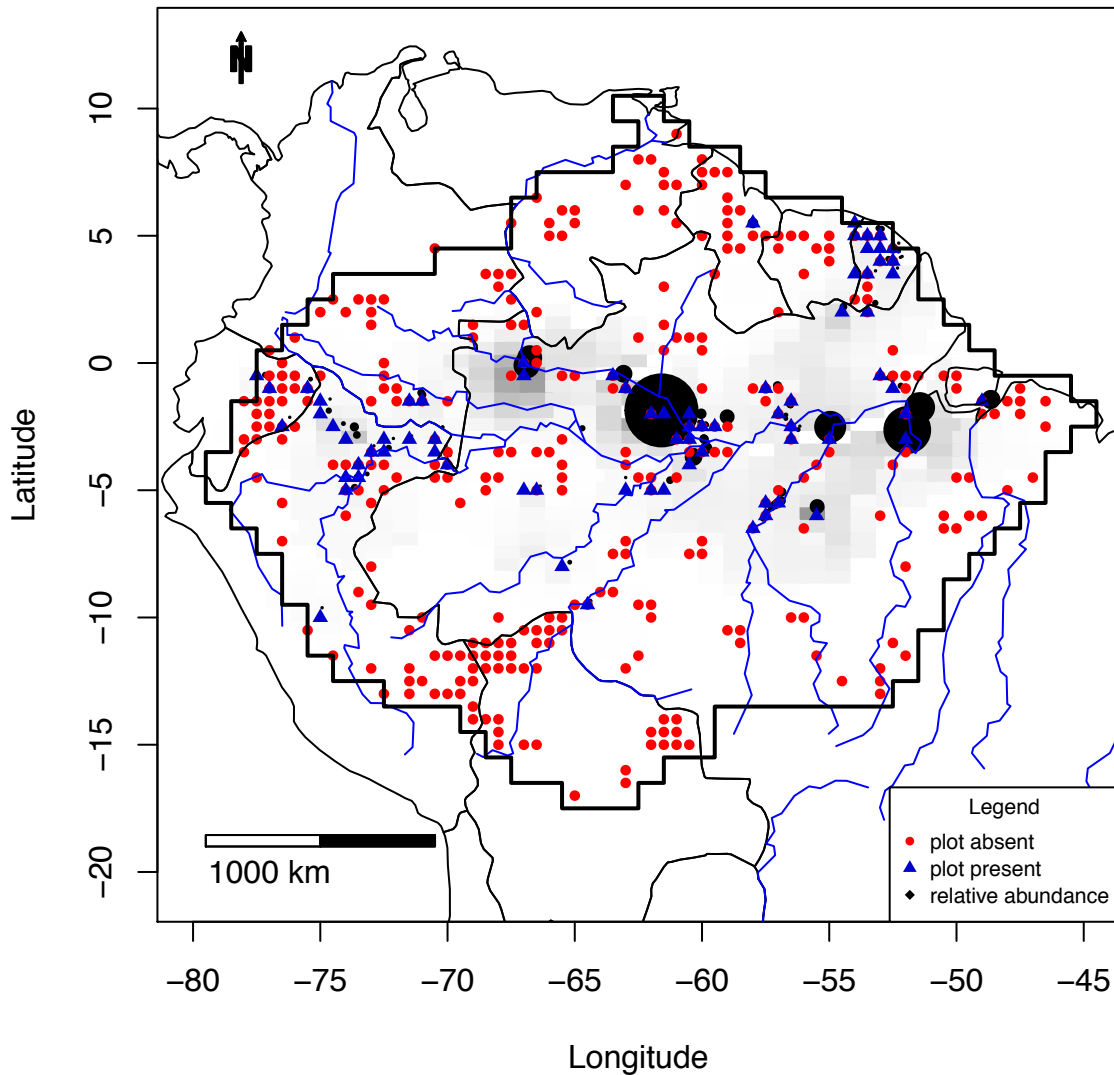

Figure S3\_153A Combined map of *Symphonia\_globulifera*

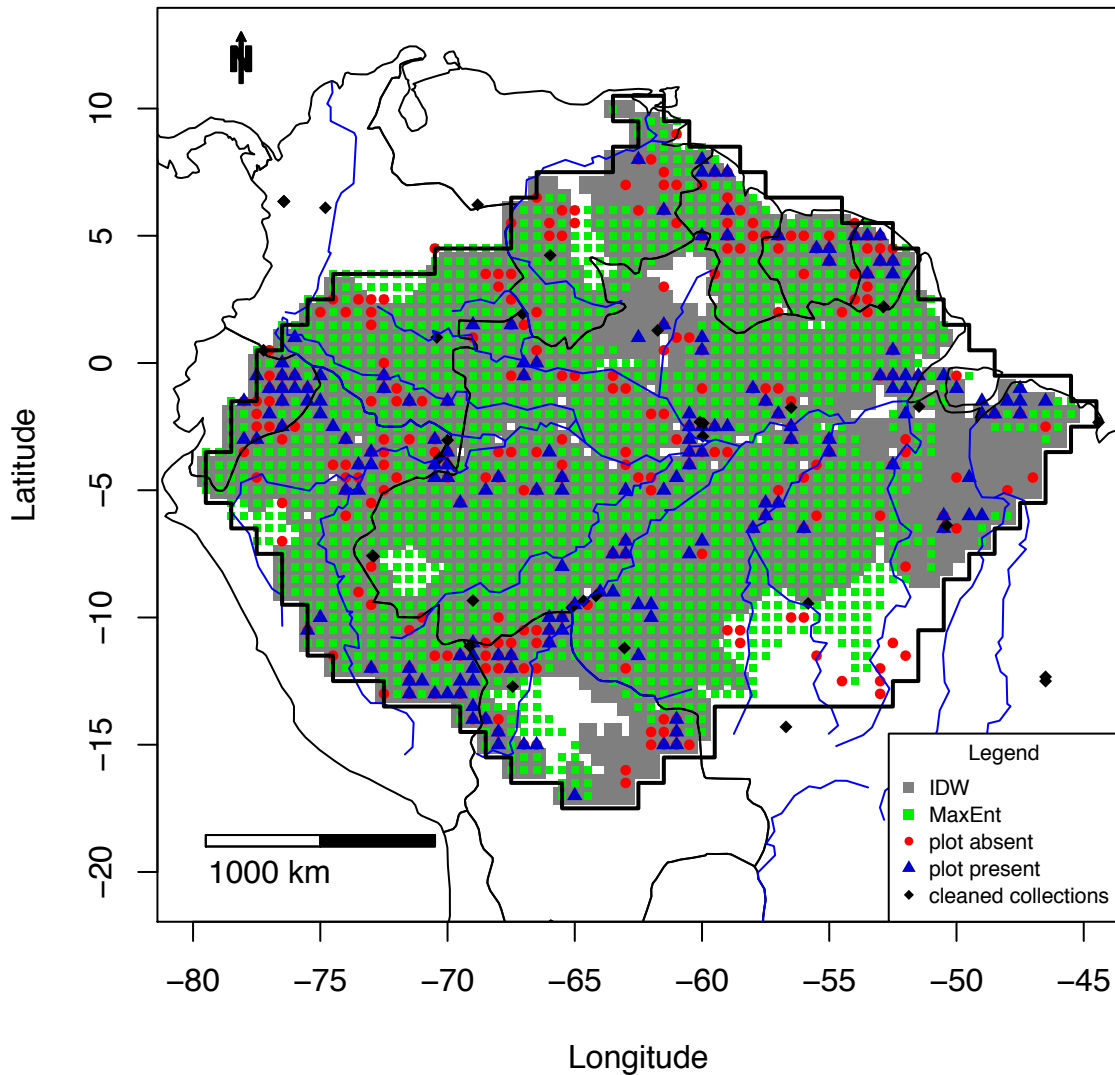

Figure S3\_153B MaxEnt map of *Symphonia\_globulifera*

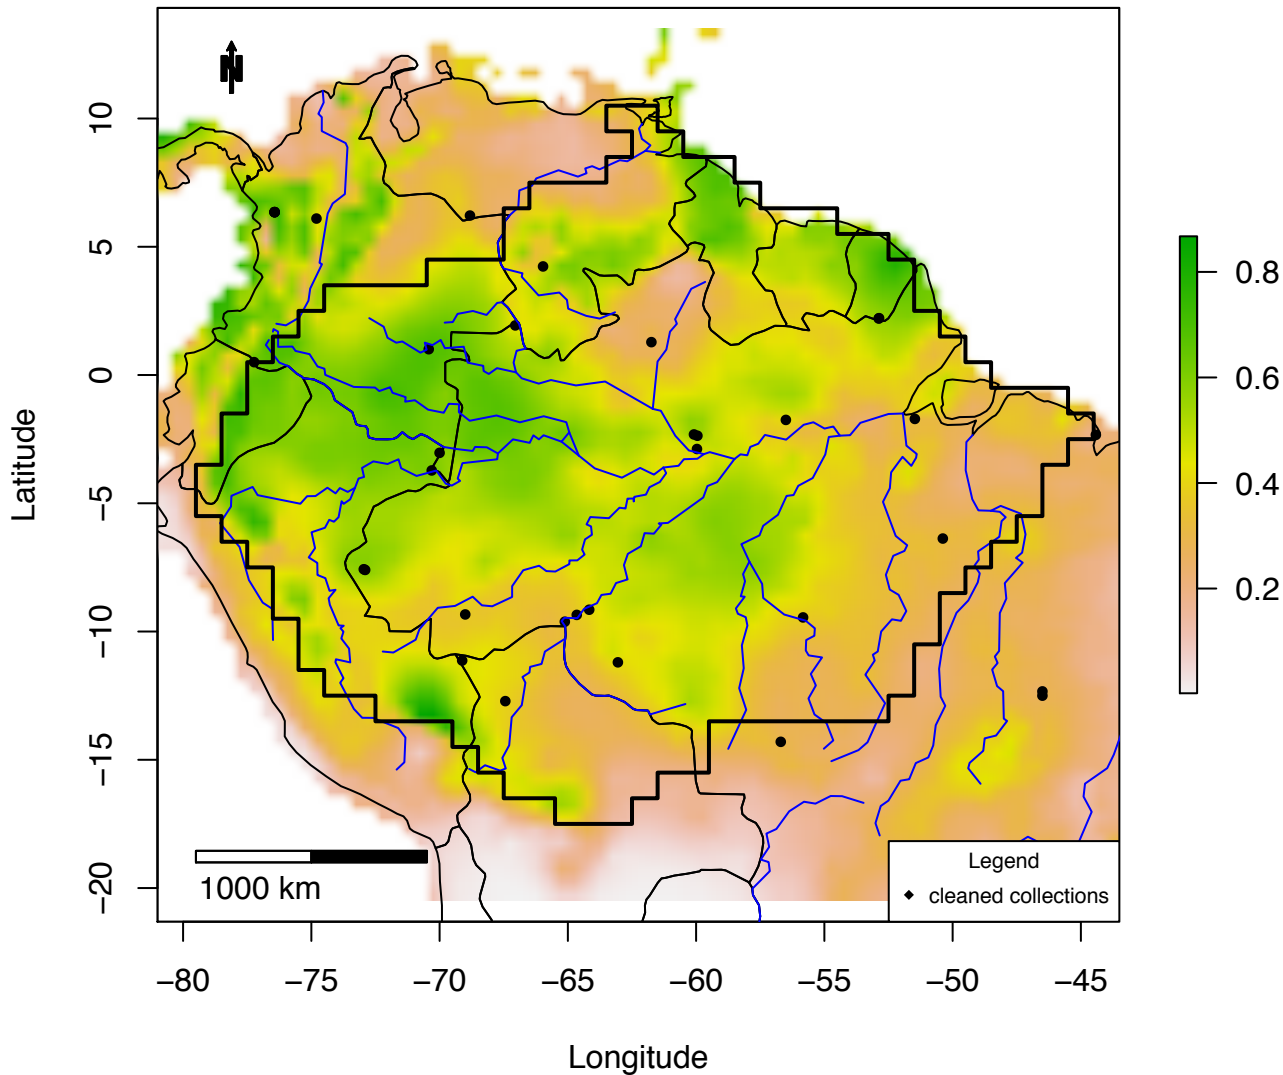

Figure S3\_153C IDW map of *Symphonia globulifera*:  
plots =0 – 0.16; IDW: 0 – 0.04

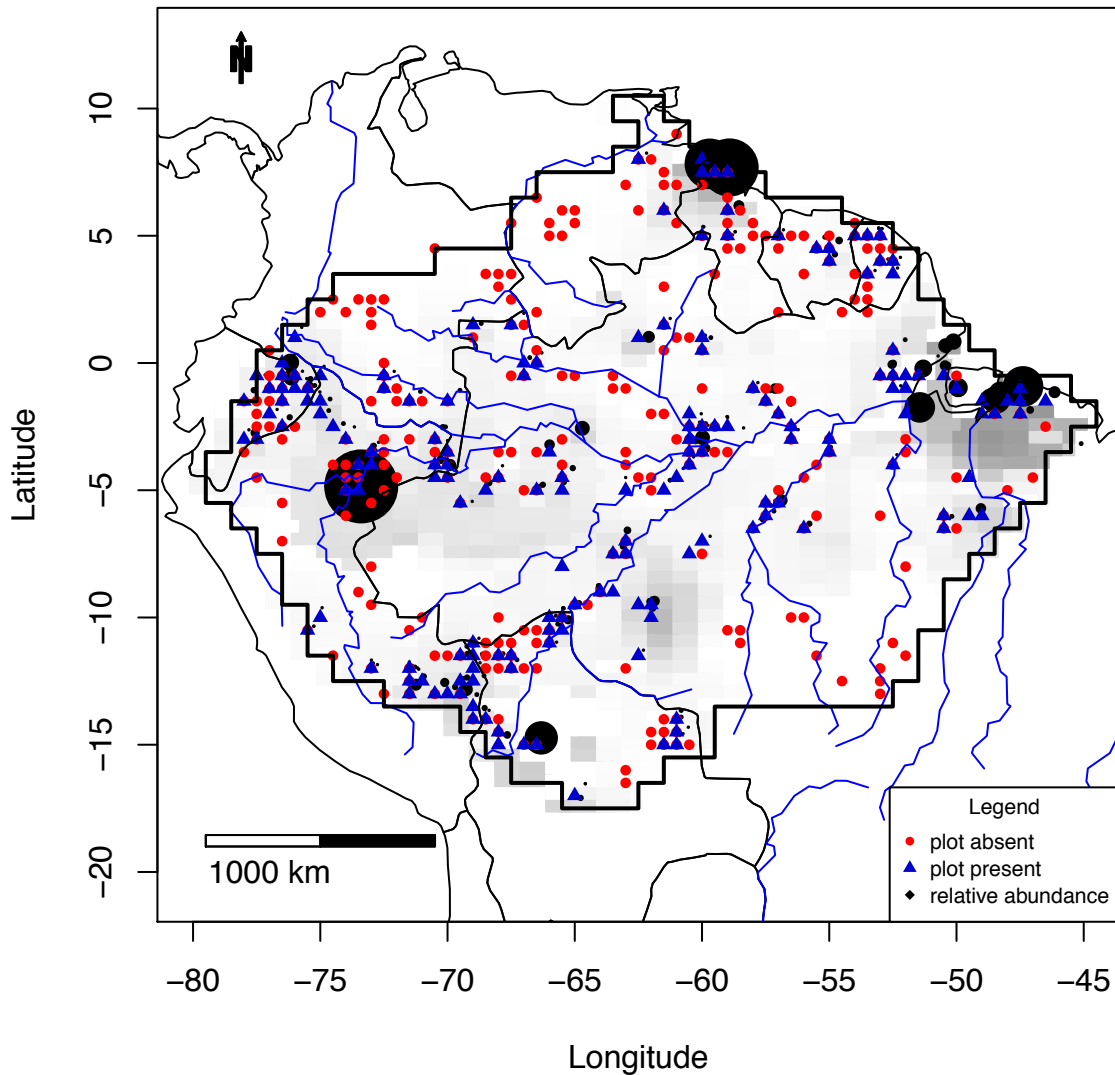

Figure S3\_154A Combined map of *Tachigali\_paniculata*

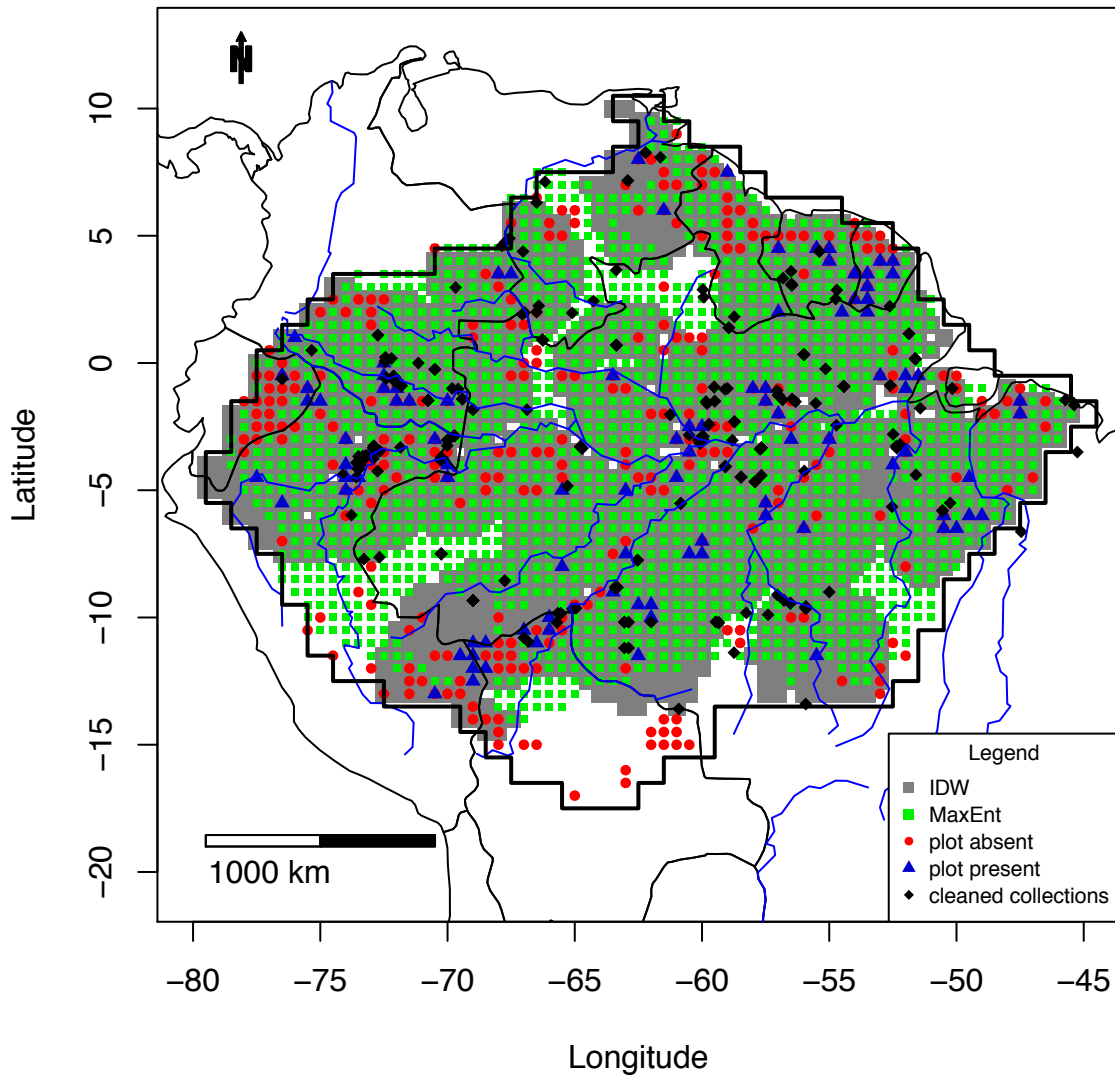

Figure S3\_154B MaxEnt map of *Tachigali\_paniculata*

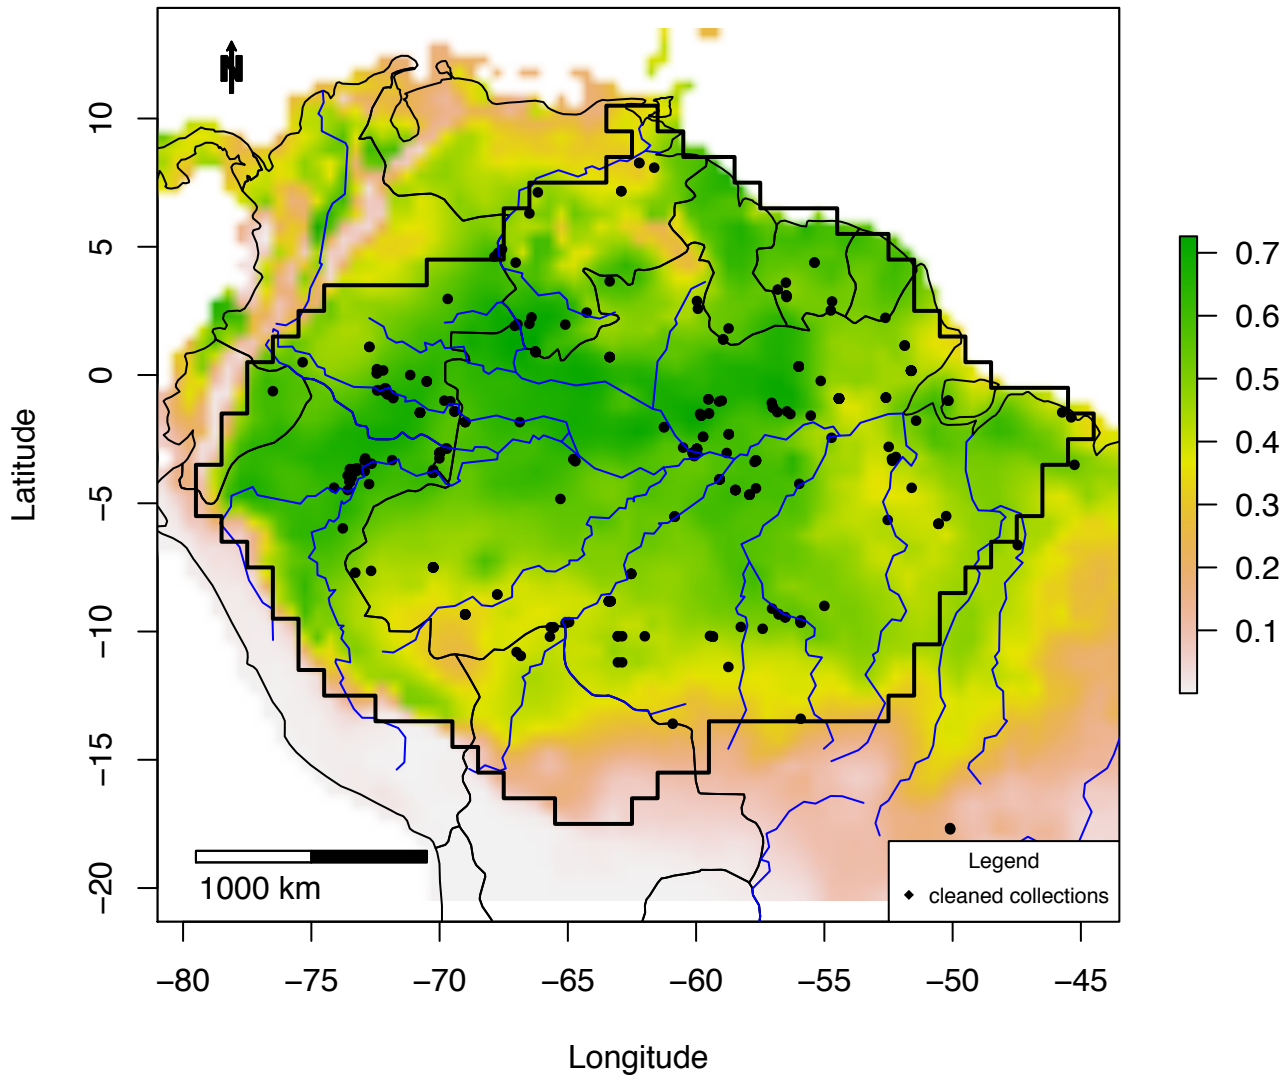

**Figure S3\_154C IDW map of *Tachigali\_paniculata*:**  
**plots =0 – 0.12; IDW: 0 – 0.08**

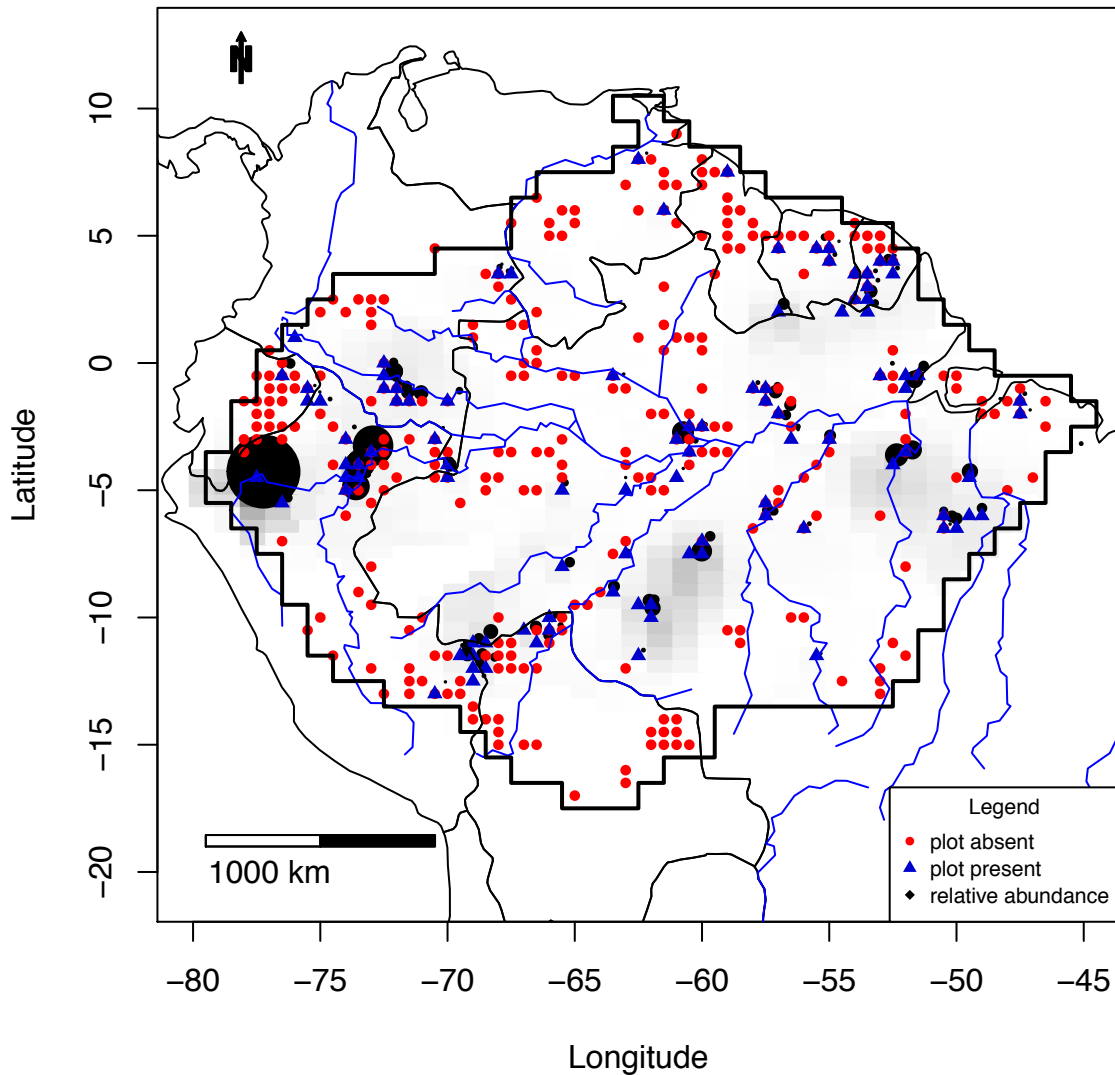

Figure S3\_155A Combined map of *Tetragastris\_panamensis*

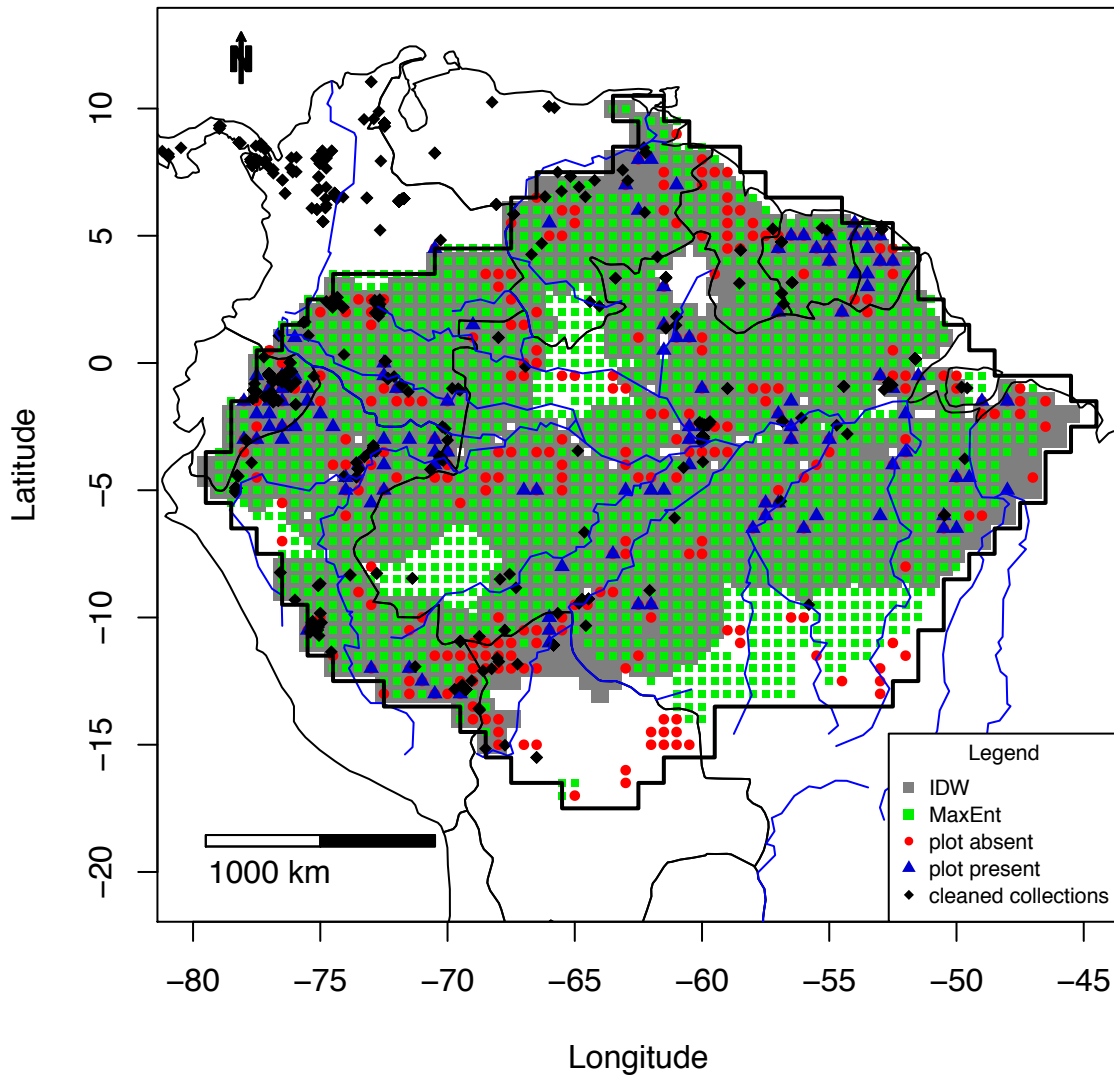



Figure S3\_155B MaxEnt map of *Tetragastris\_panamensis*

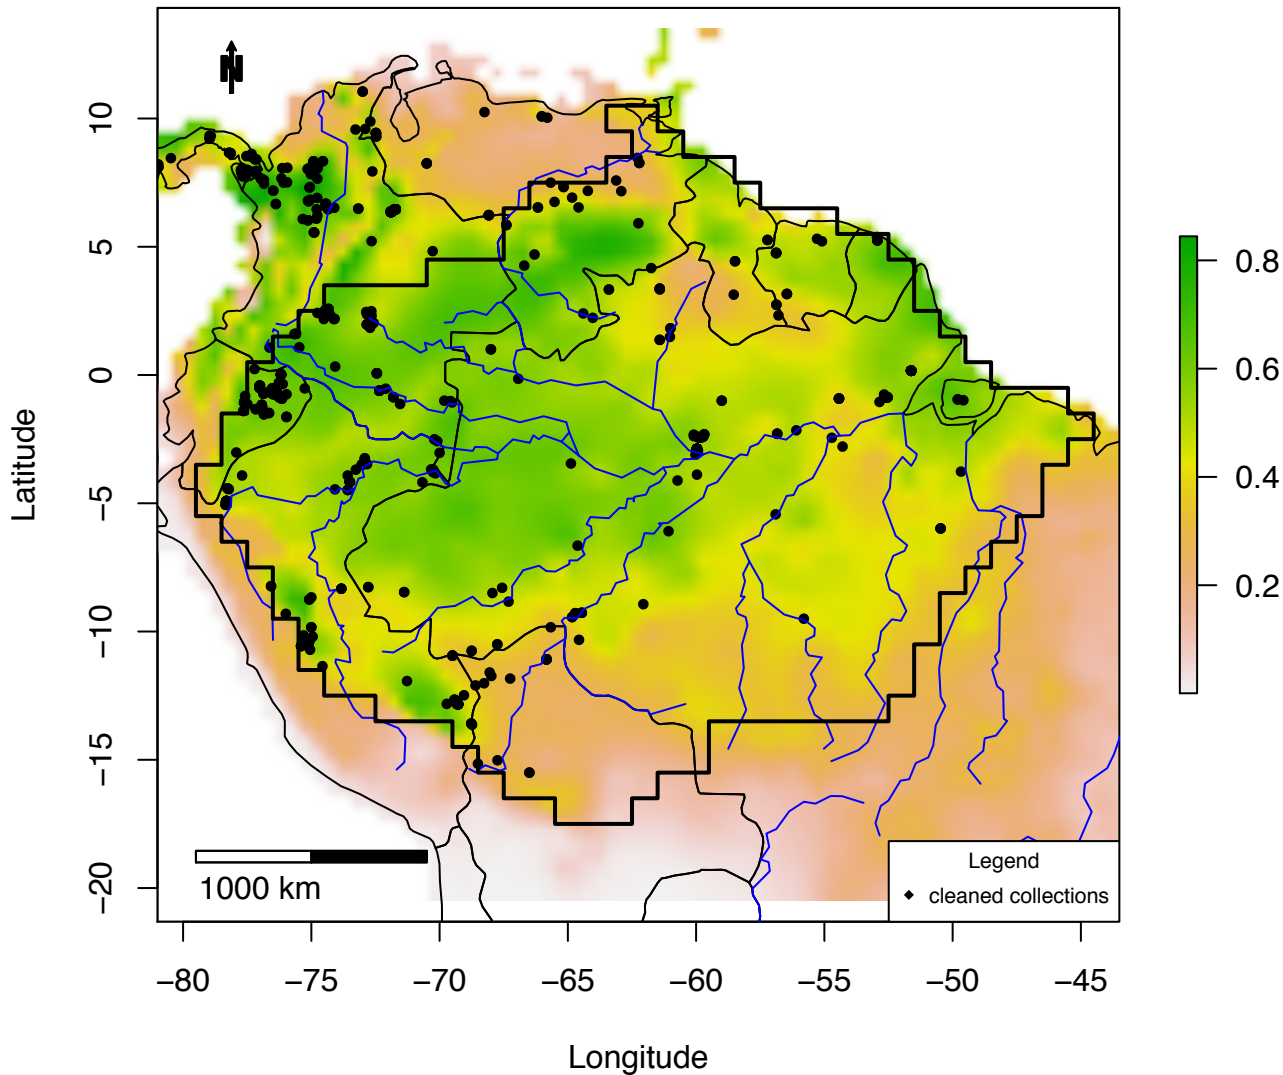

Figure S3\_155C IDW map of *Tetragastris\_panamensis*:  
plots =0 – 0.11; IDW: 0 – 0.05

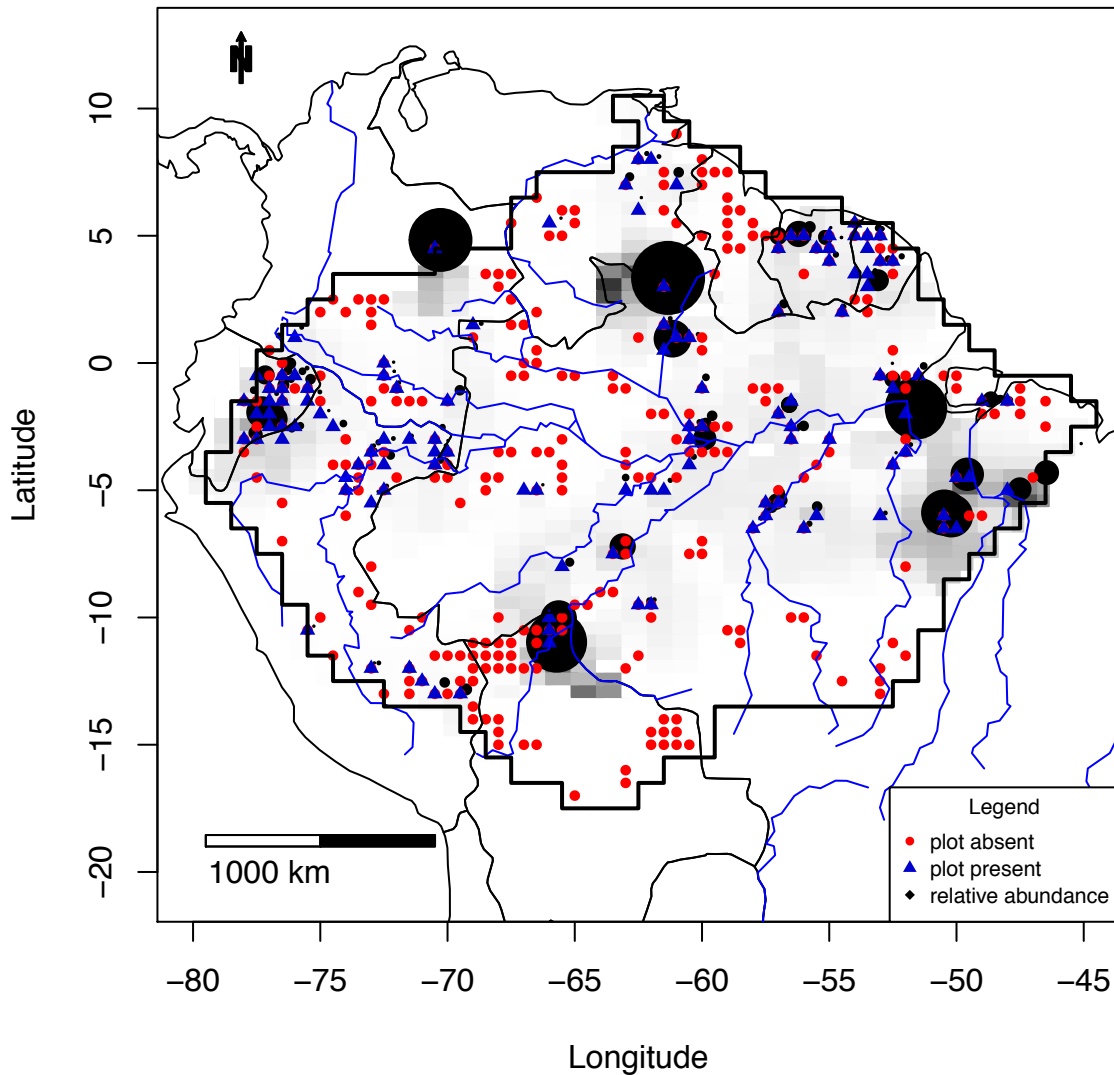

Figure S3\_156A Combined map of *Theobroma cacao*

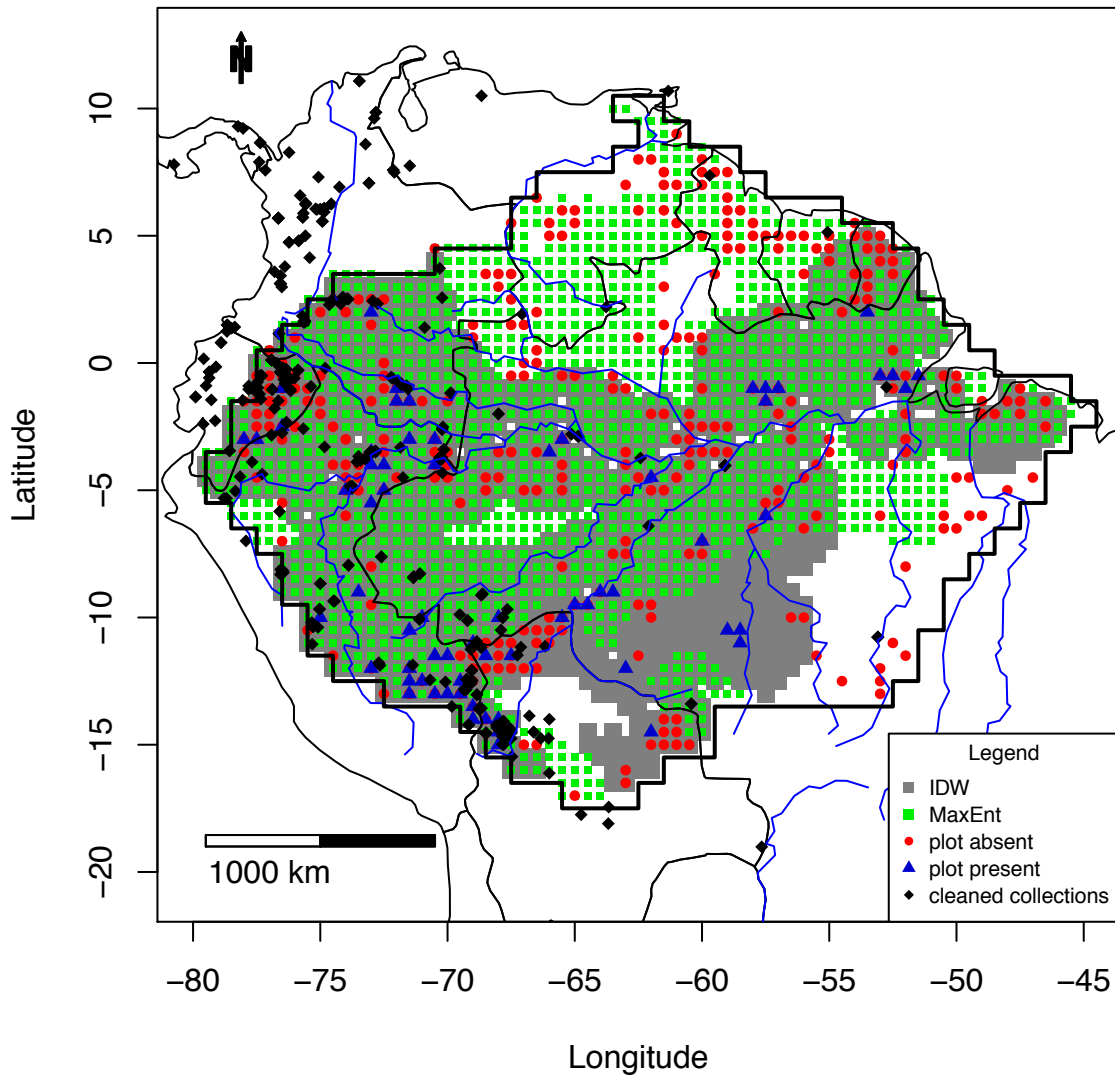

Figure S3\_156B MaxEnt map of *Theobroma cacao*

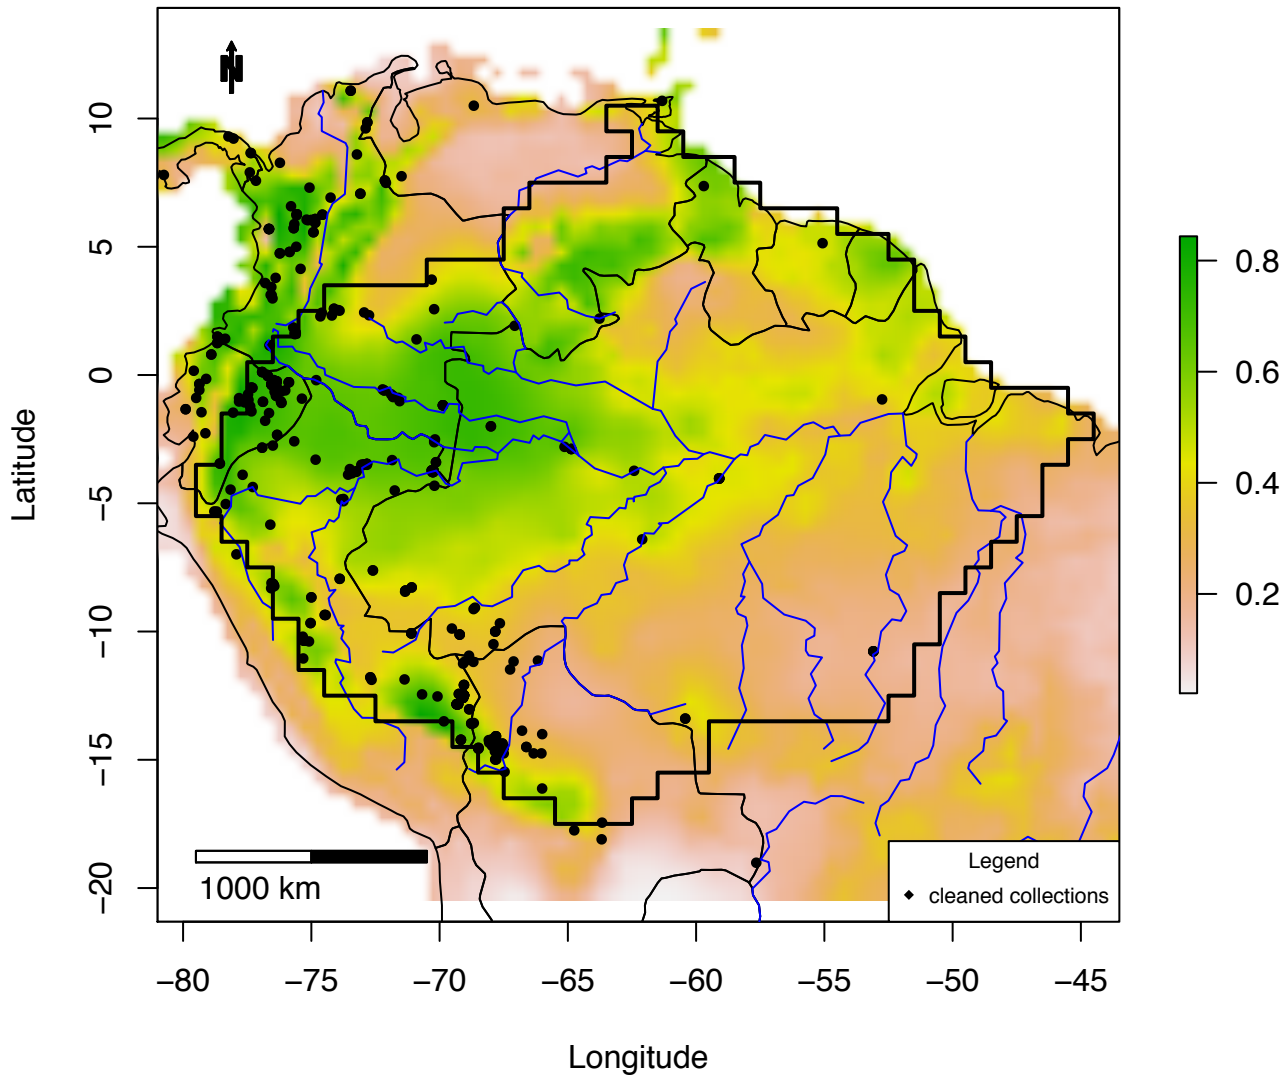

Figure S3\_156C IDW map of *Theobroma cacao*:  
plots =0 – 0.31; IDW: 0 – 0.25

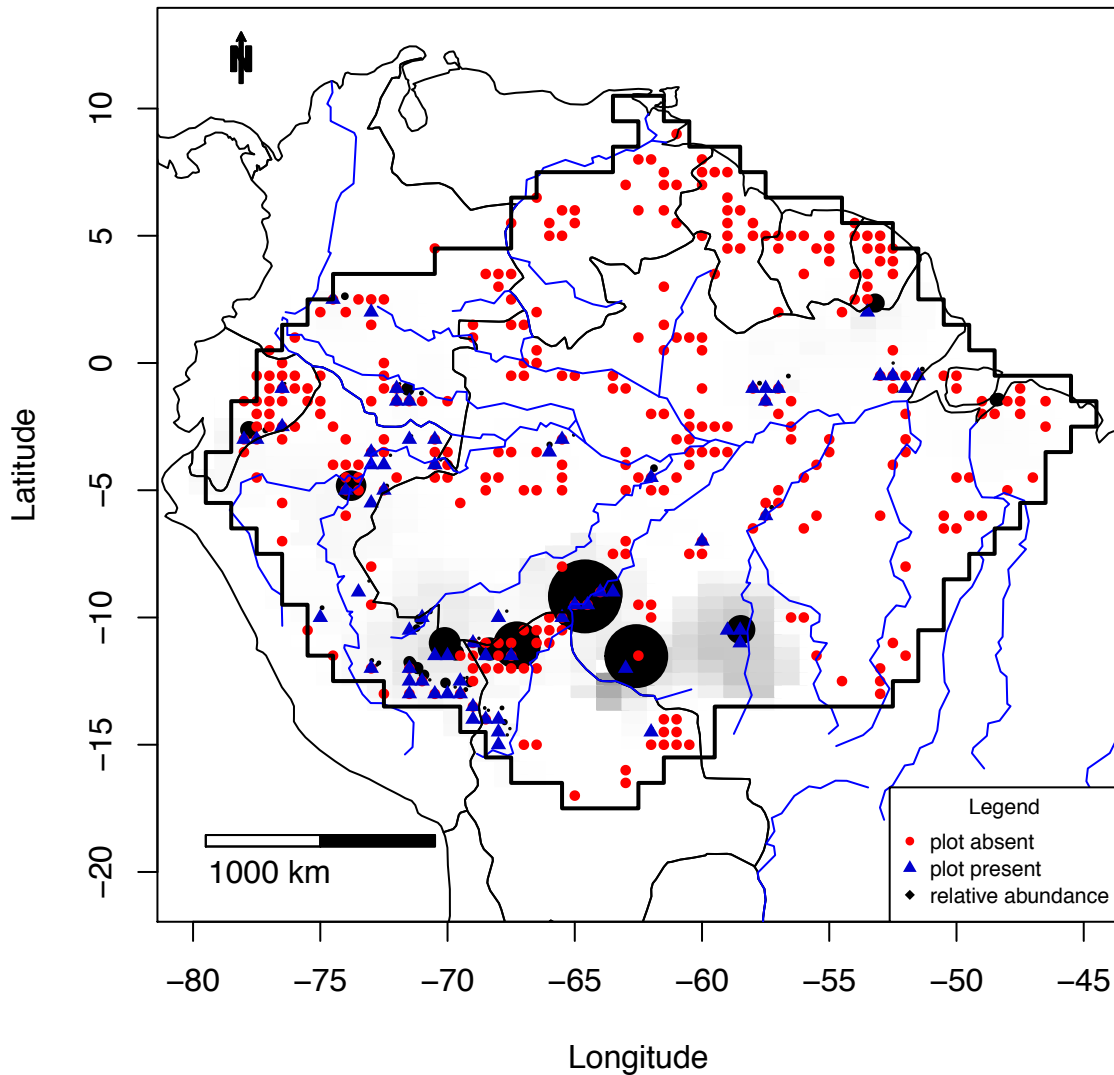

Figure S3\_157A Combined map of *Theobroma speciosum*

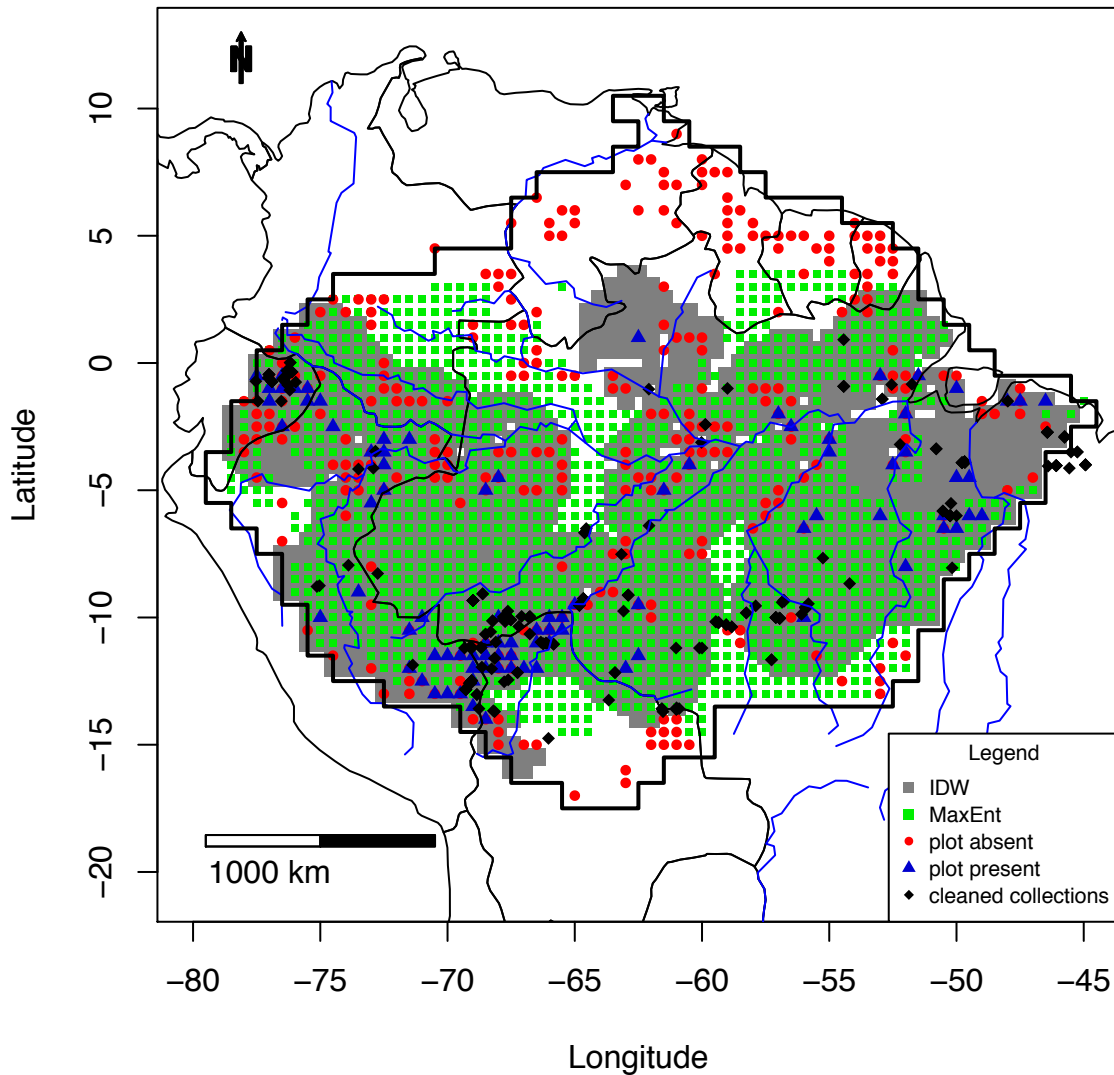

Figure S3\_157B MaxEnt map of *Theobroma speciosum*

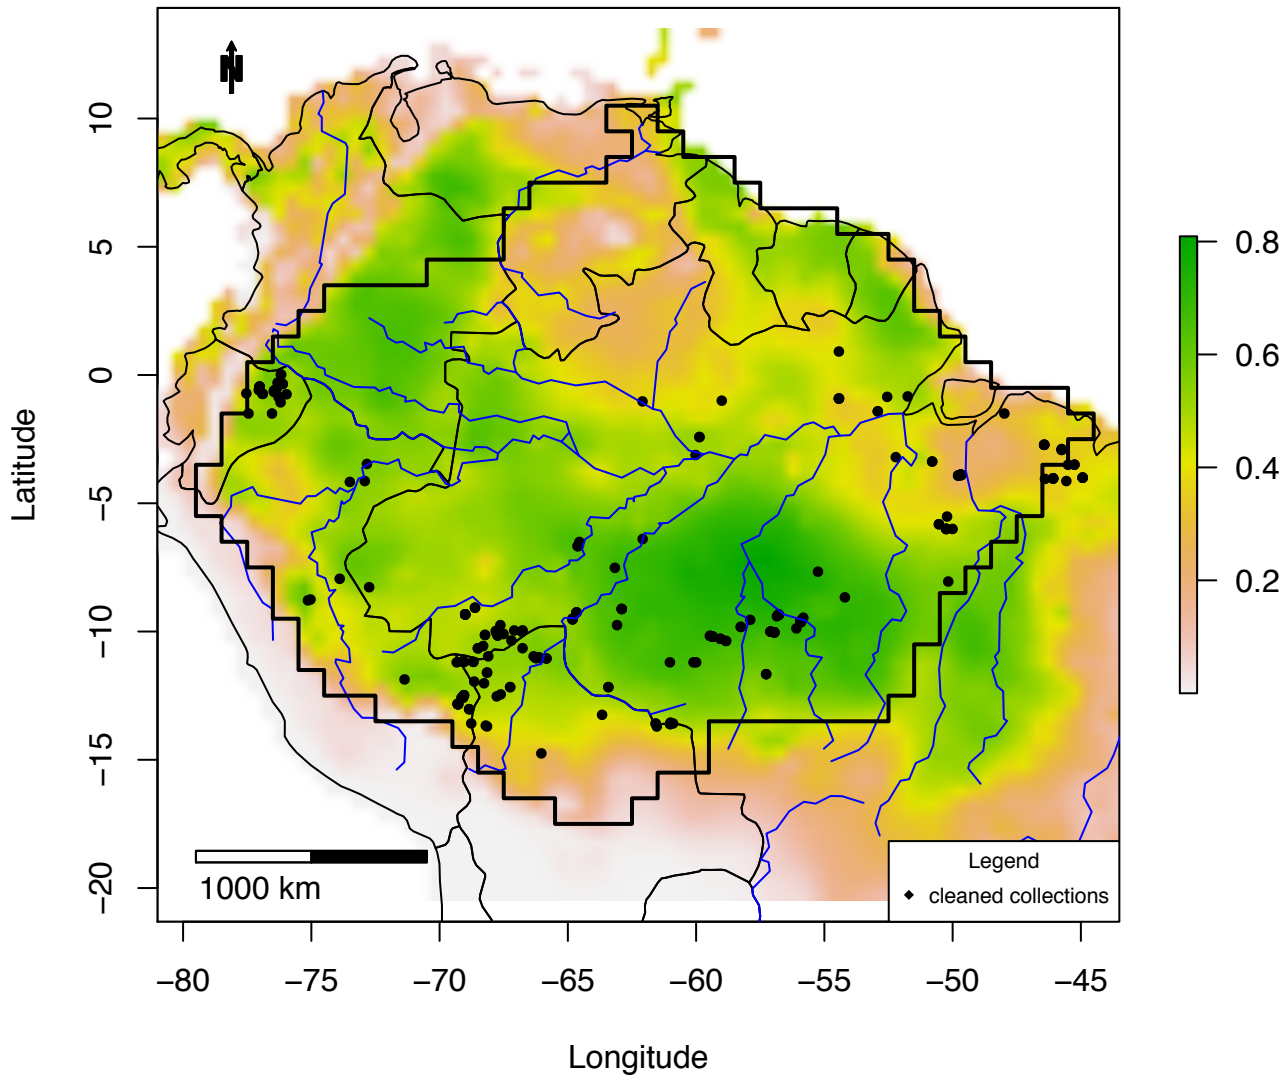

Figure S3\_157C IDW map of *Theobroma speciosum*:  
plots =0 – 0.1; IDW: 0 – 0.07

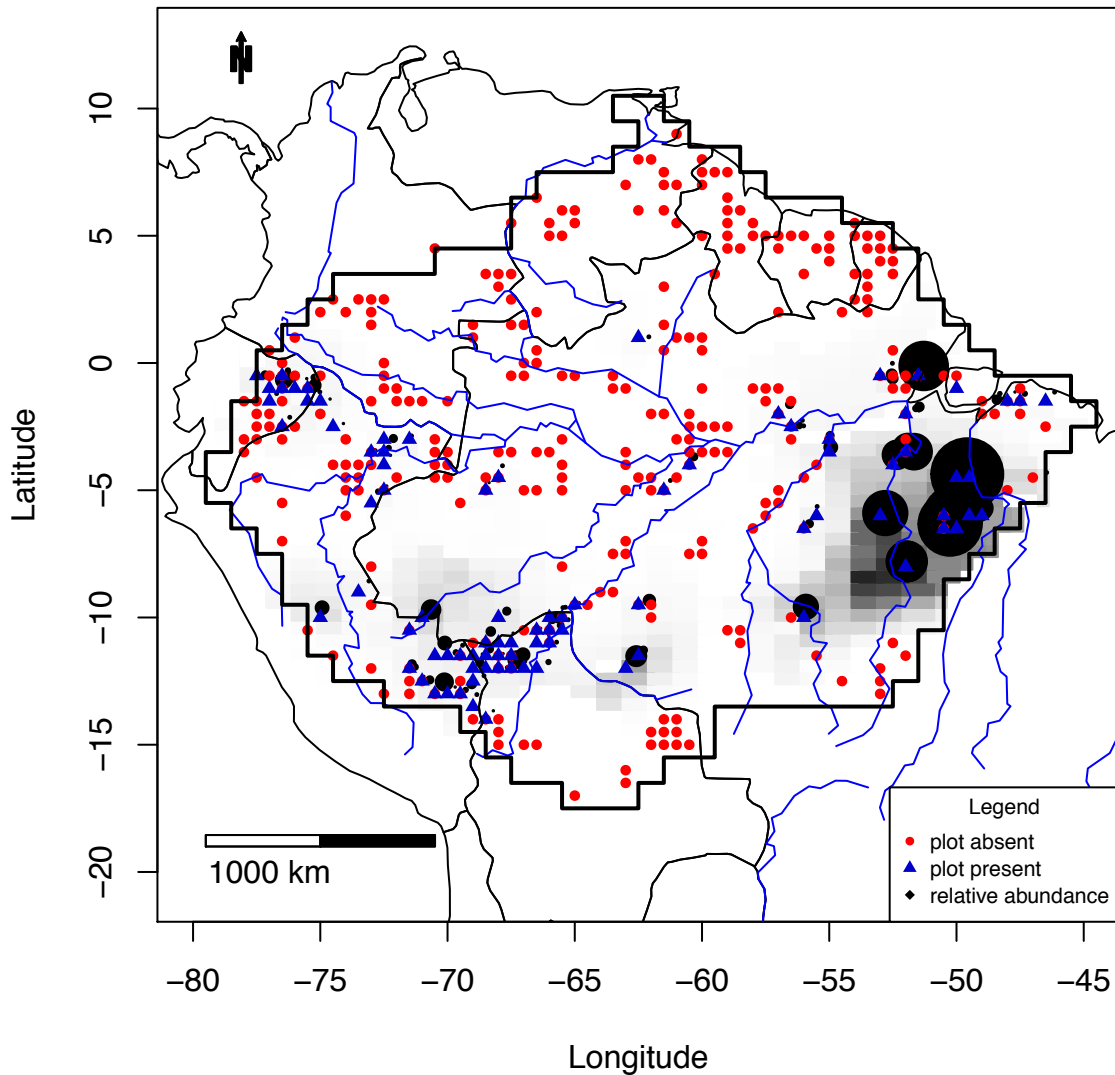



Figure S3\_158A Combined map of *Theobroma\_subincanum*

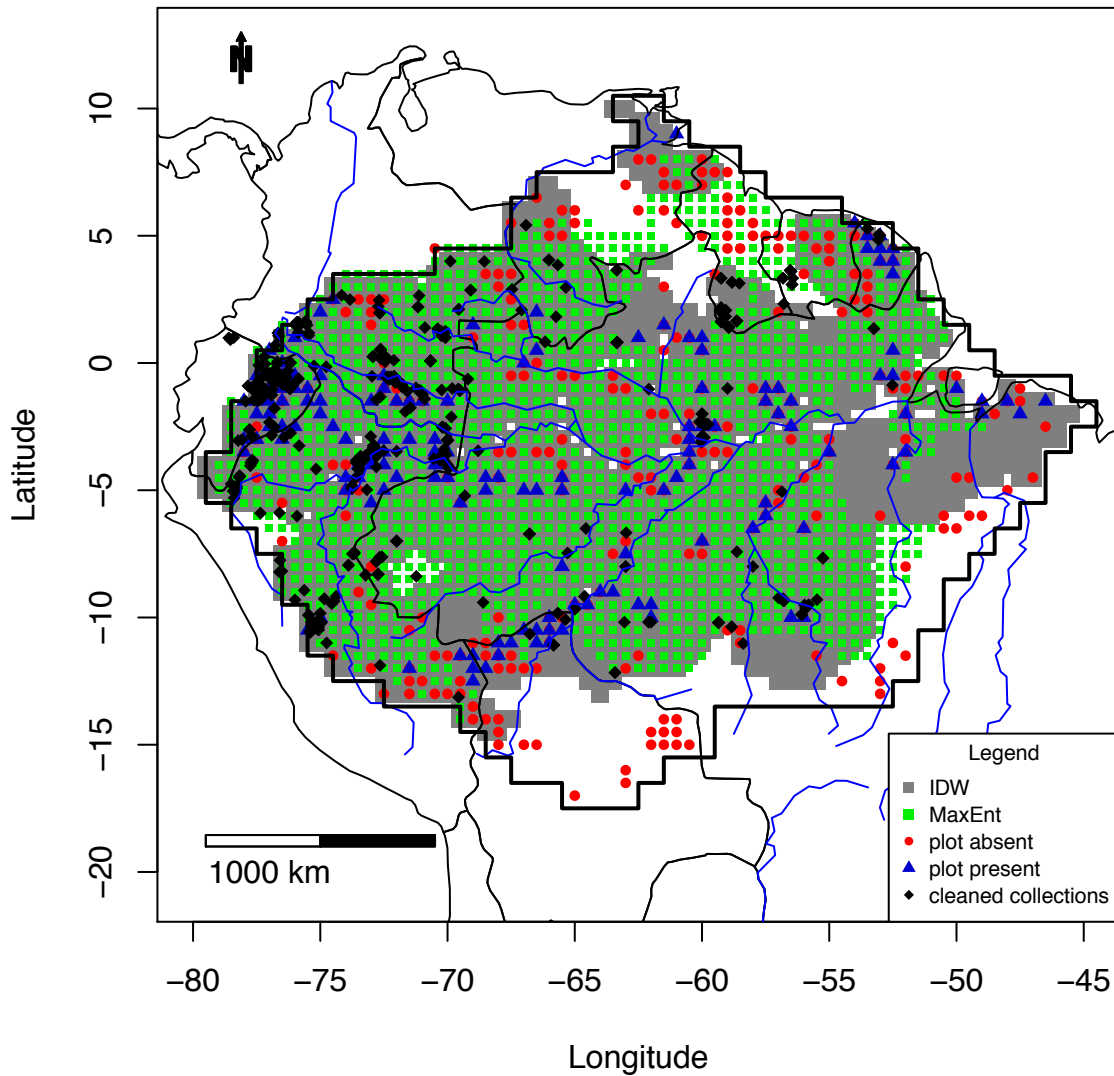

Figure S3\_158B MaxEnt map of *Theobroma\_subincanum*

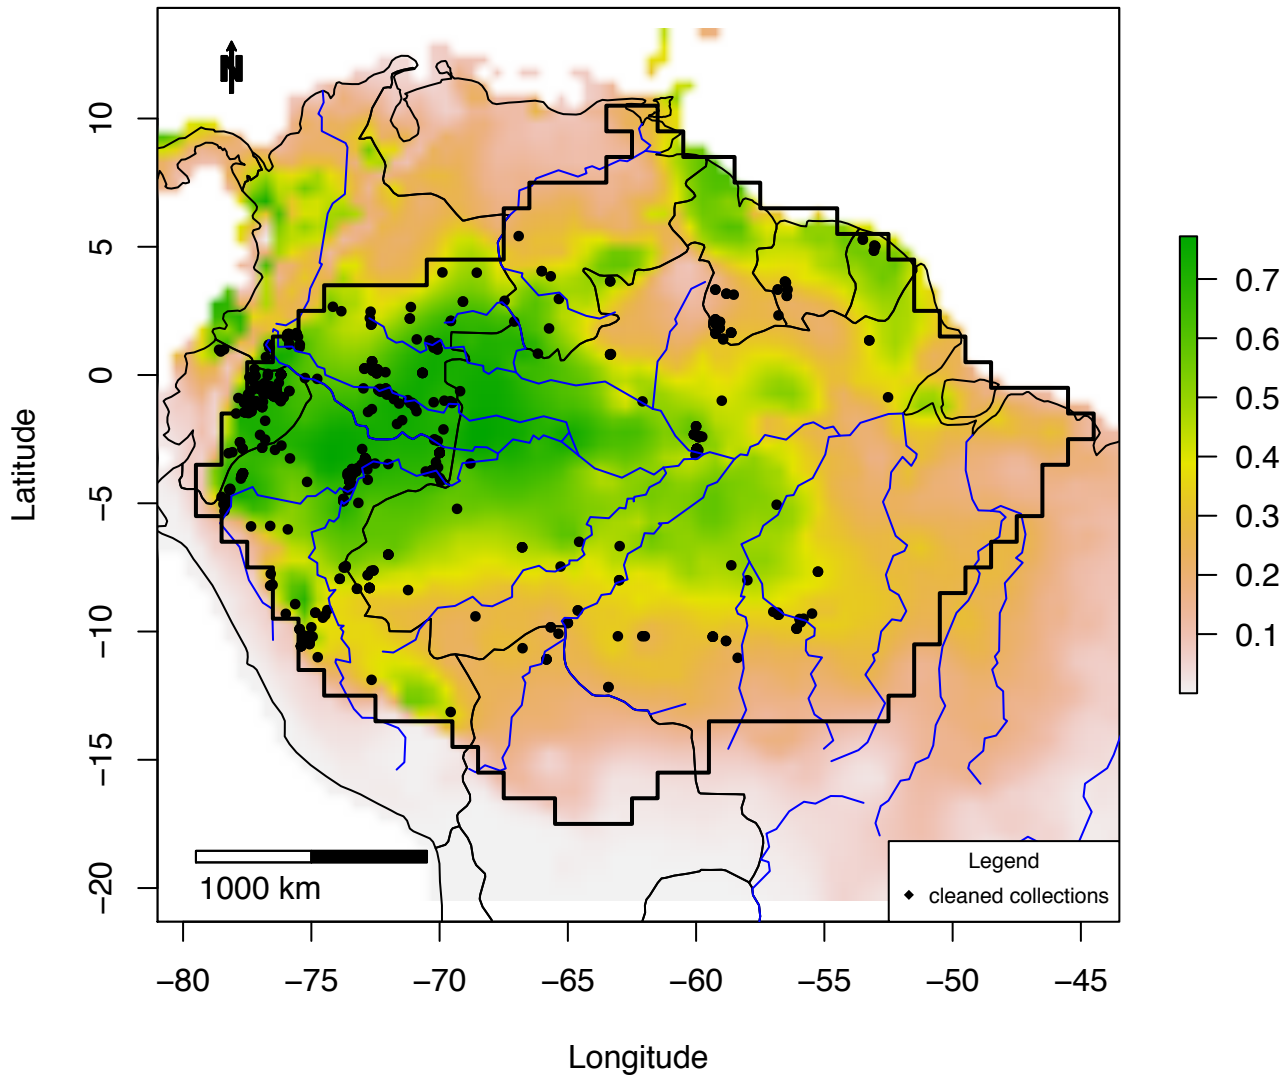

Figure S3\_158C IDW map of *Theobroma subincanum*:  
plots = 0 – 0.08; IDW: 0 – 0.04

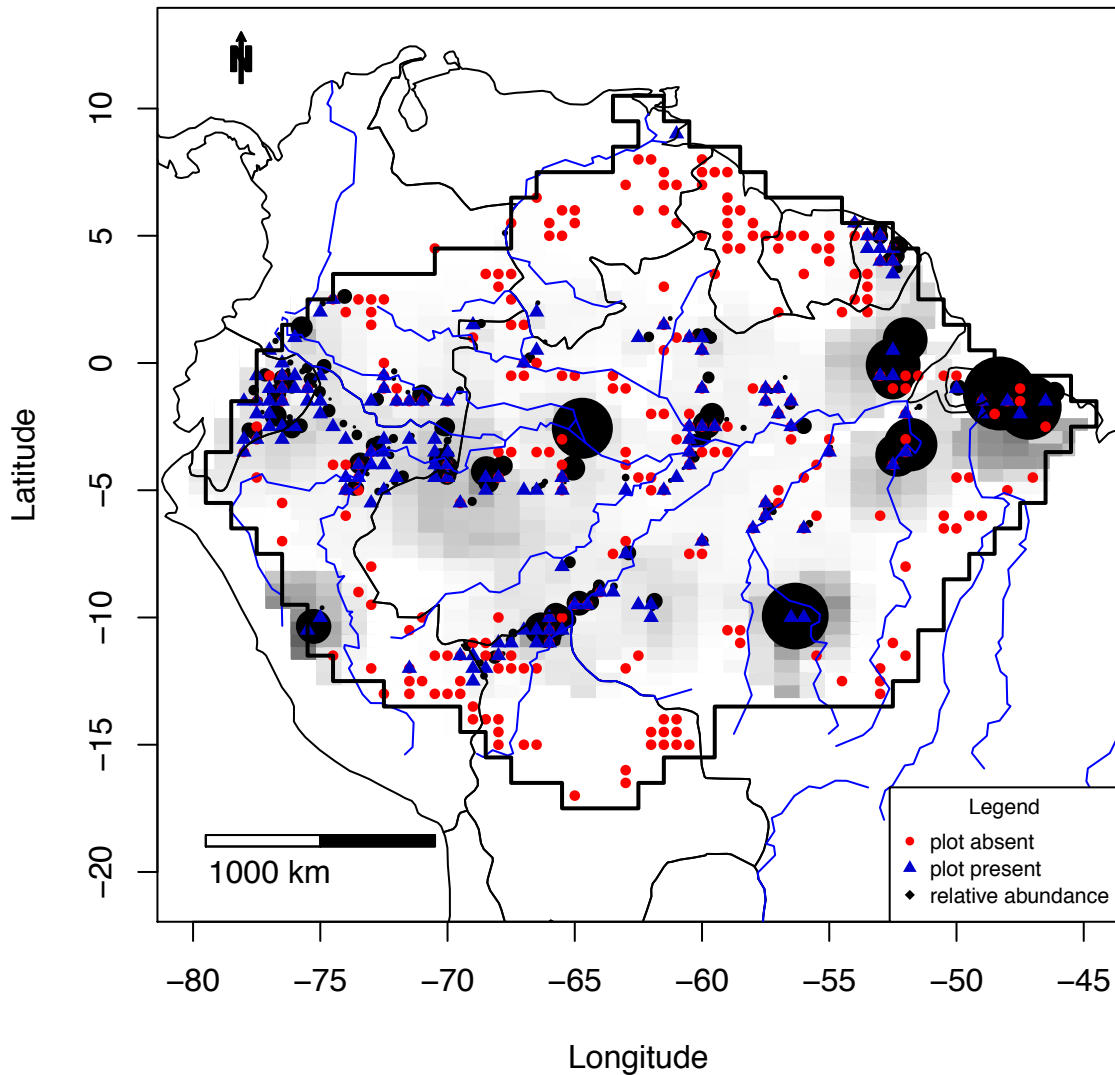

Figure S3\_159A Combined map of *Trattinnickia\_burserifolia*

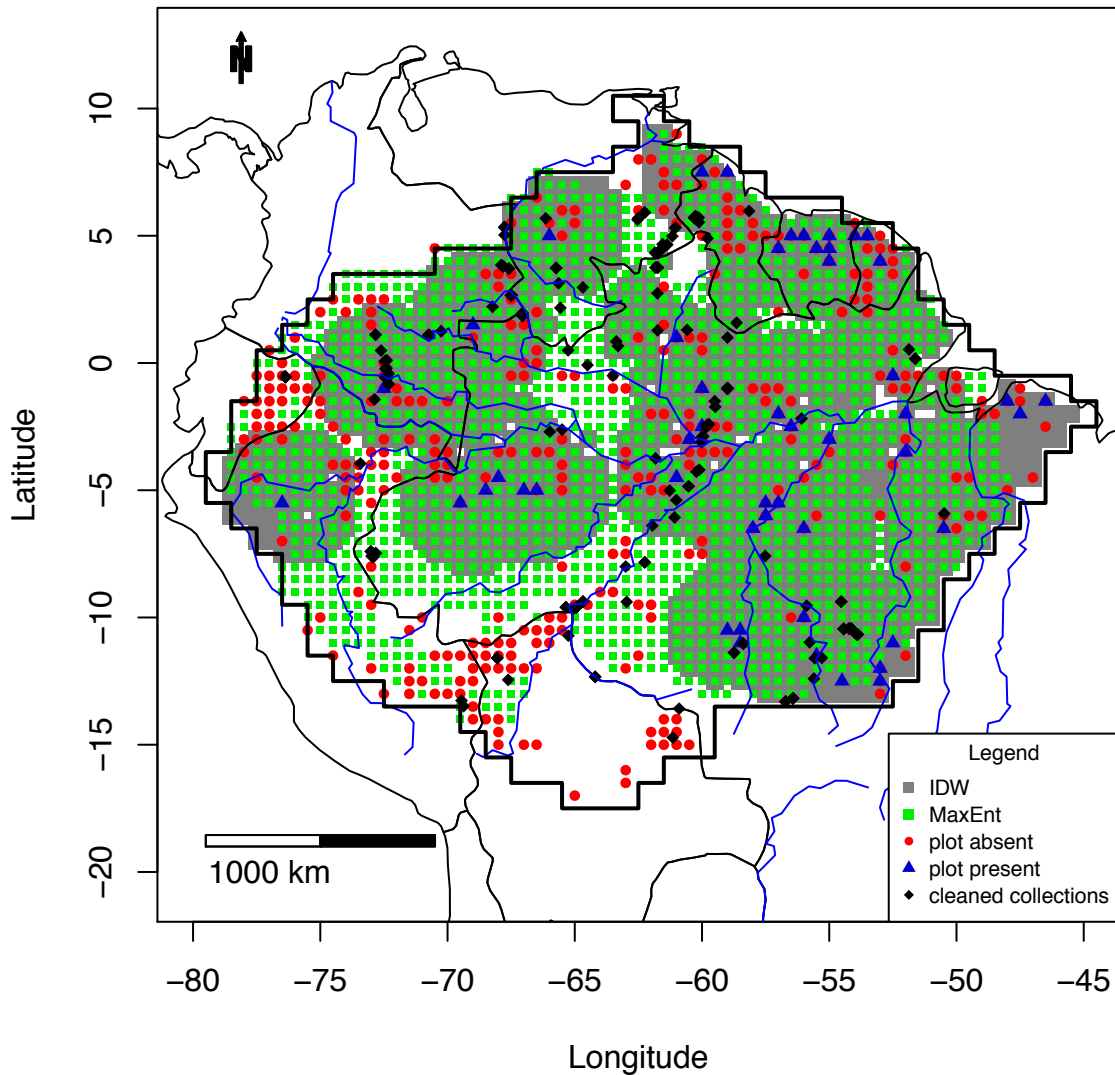

Figure S3\_159B MaxEnt map of *Trattinnickia\_burserifolia*

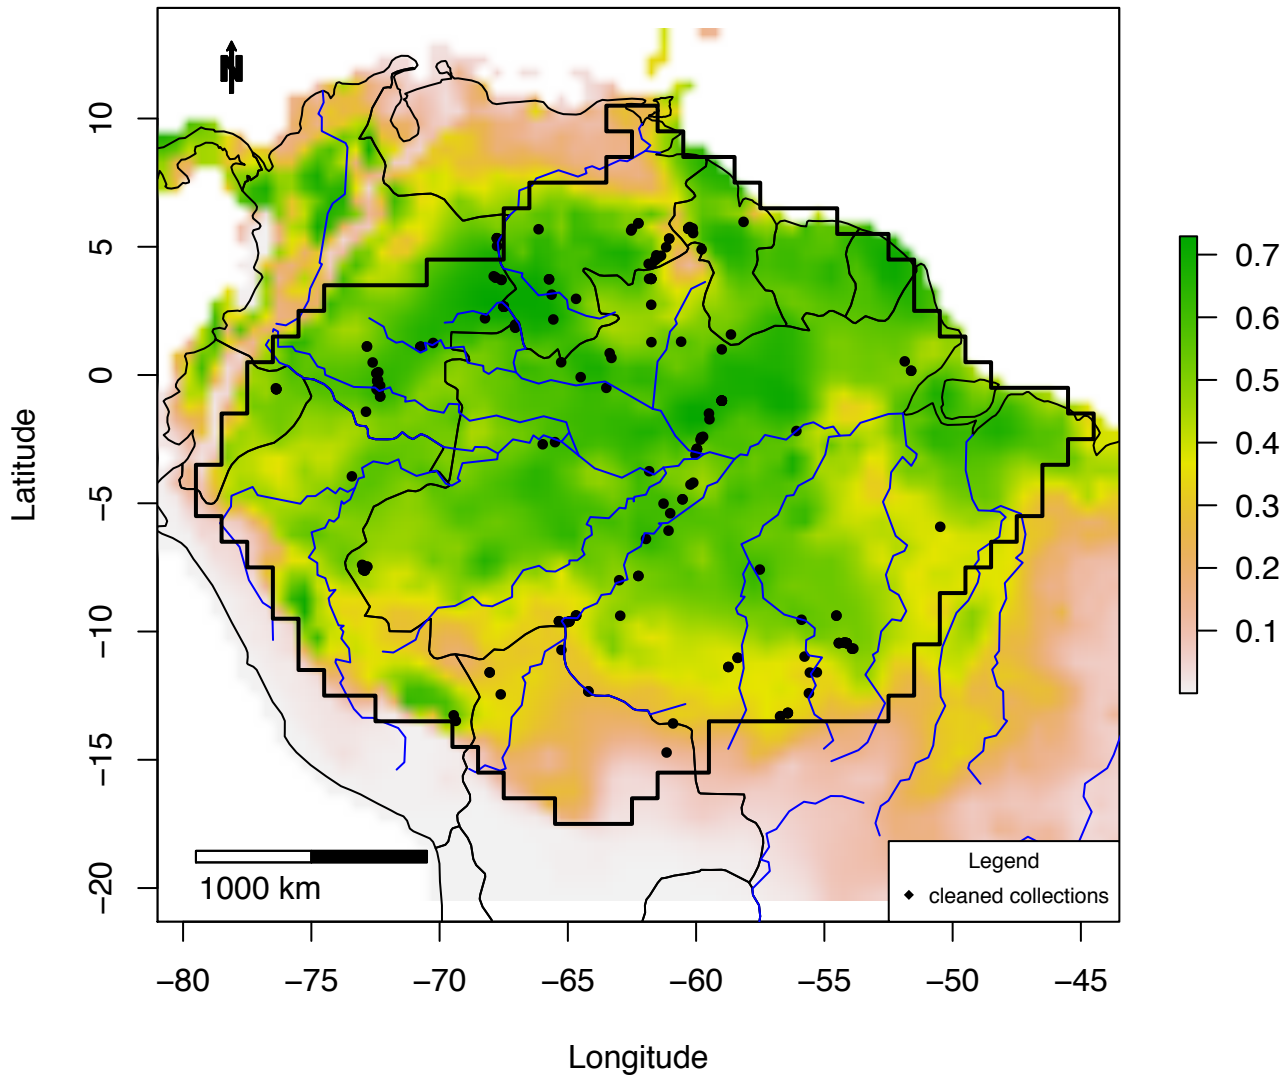

Figure S3\_159C IDW map of *Trattinnickia\_burserifolia*:  
plots =0 – 0.46; IDW: 0 – 0.27

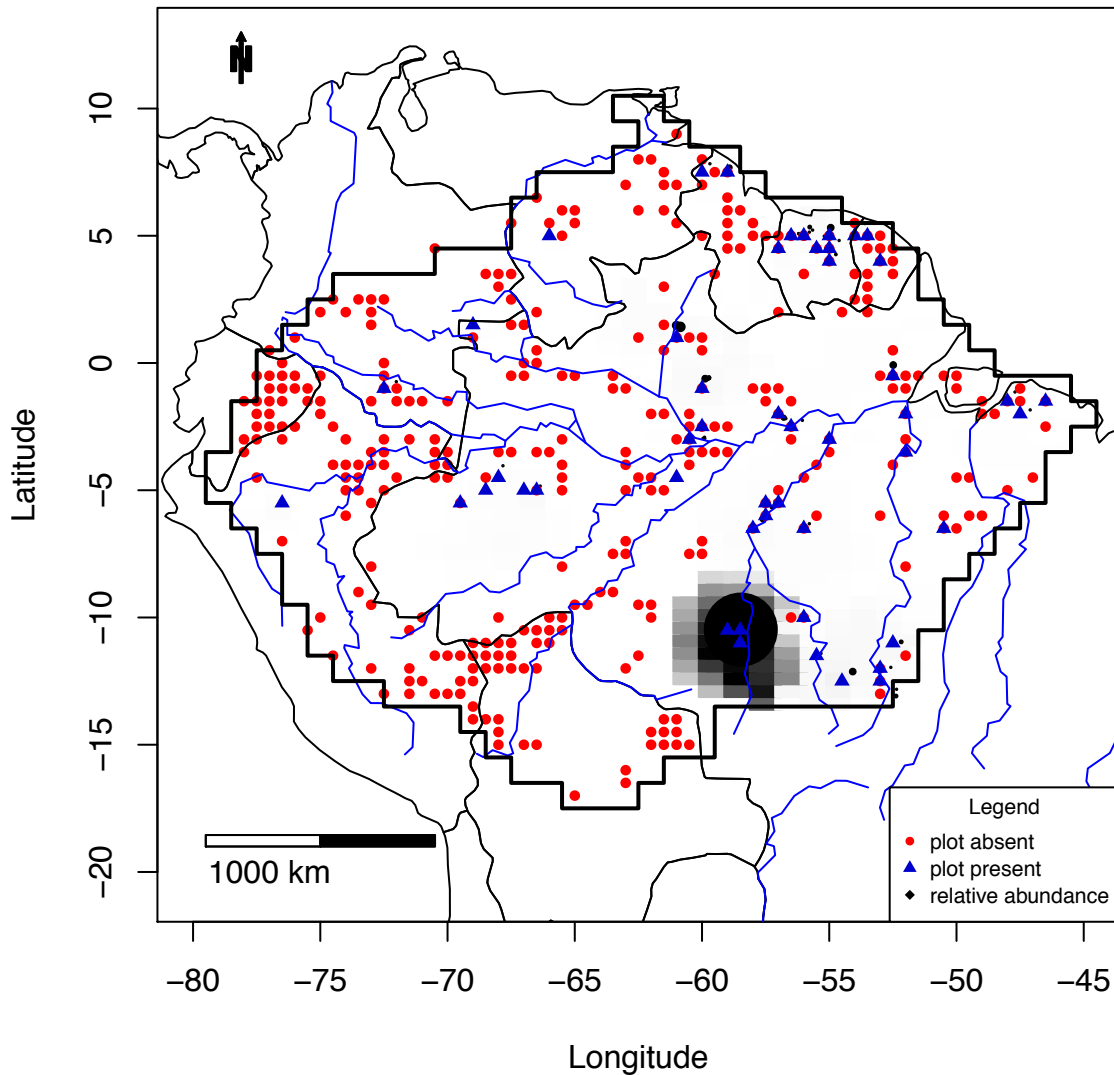

Figure S3\_160A Combined map of *Triplaris\_weigeltiana*

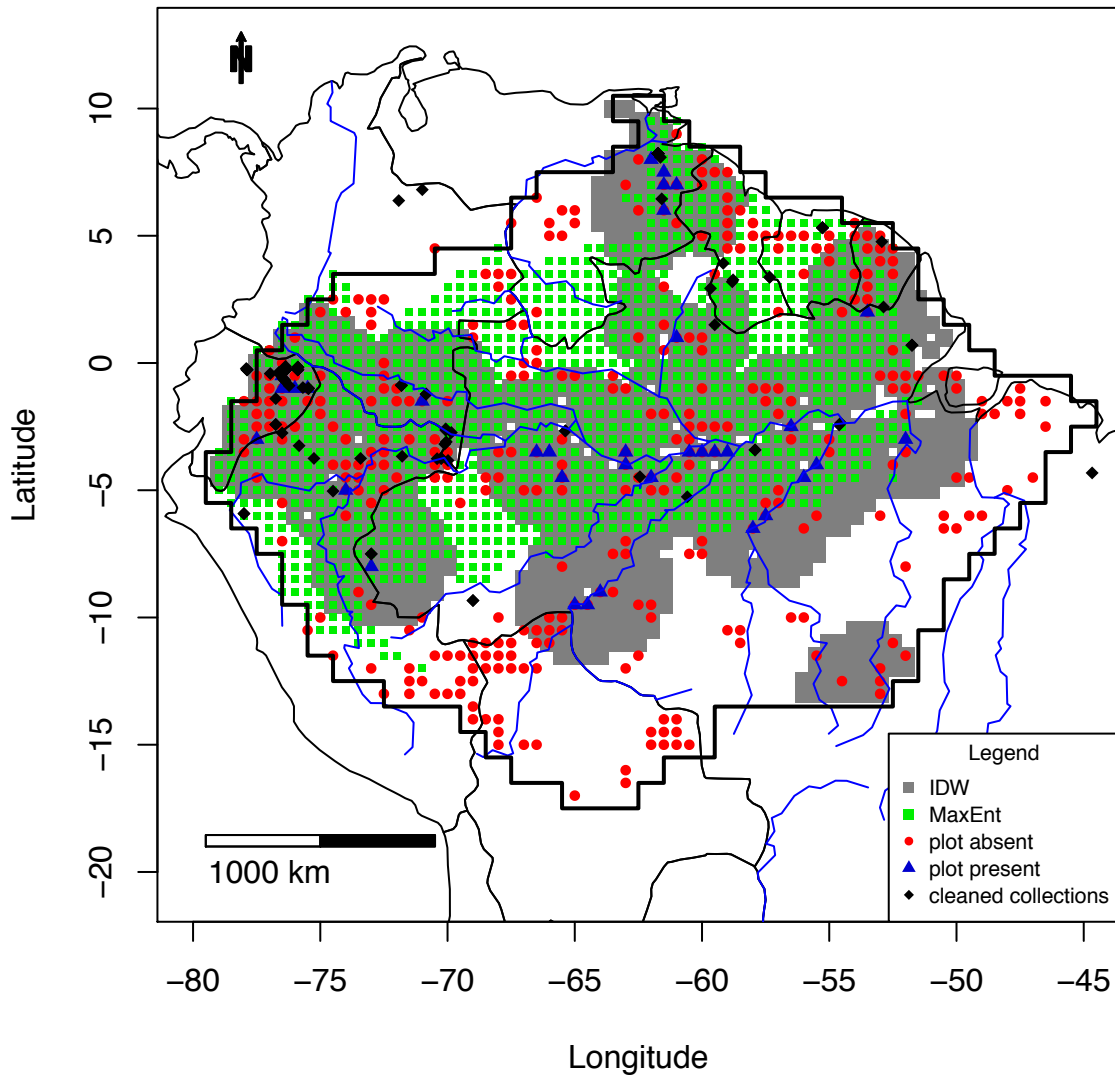

Figure S3\_160B MaxEnt map of *Triplaris\_weigeltiana*

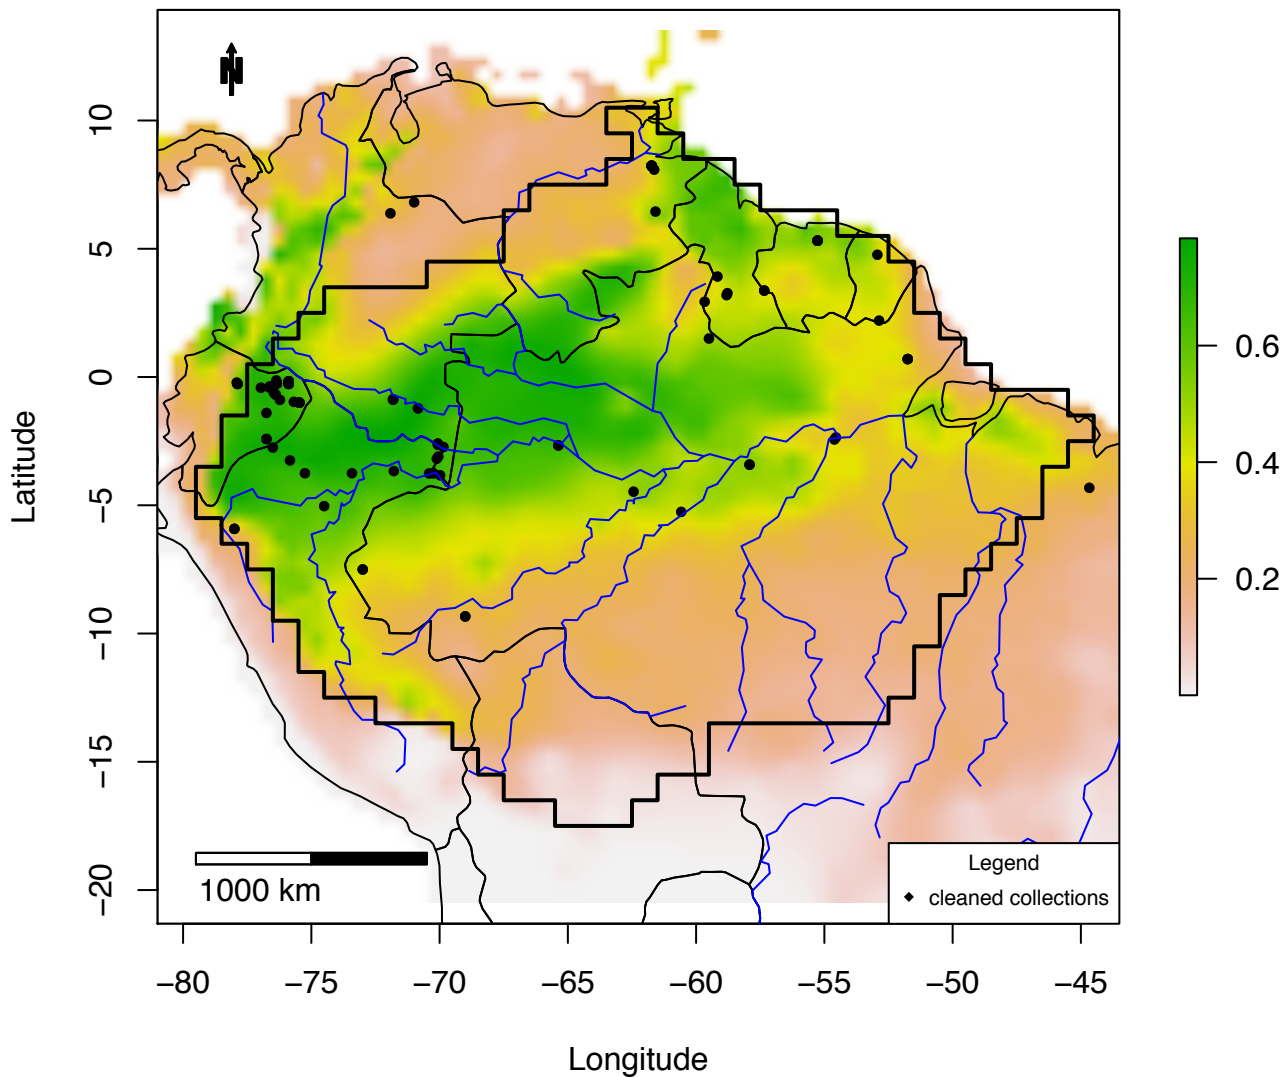



Figure S3\_160C IDW map of *Triplaris weigeltiana*:  
plots =0 – 0.61; IDW: 0 – 0.07

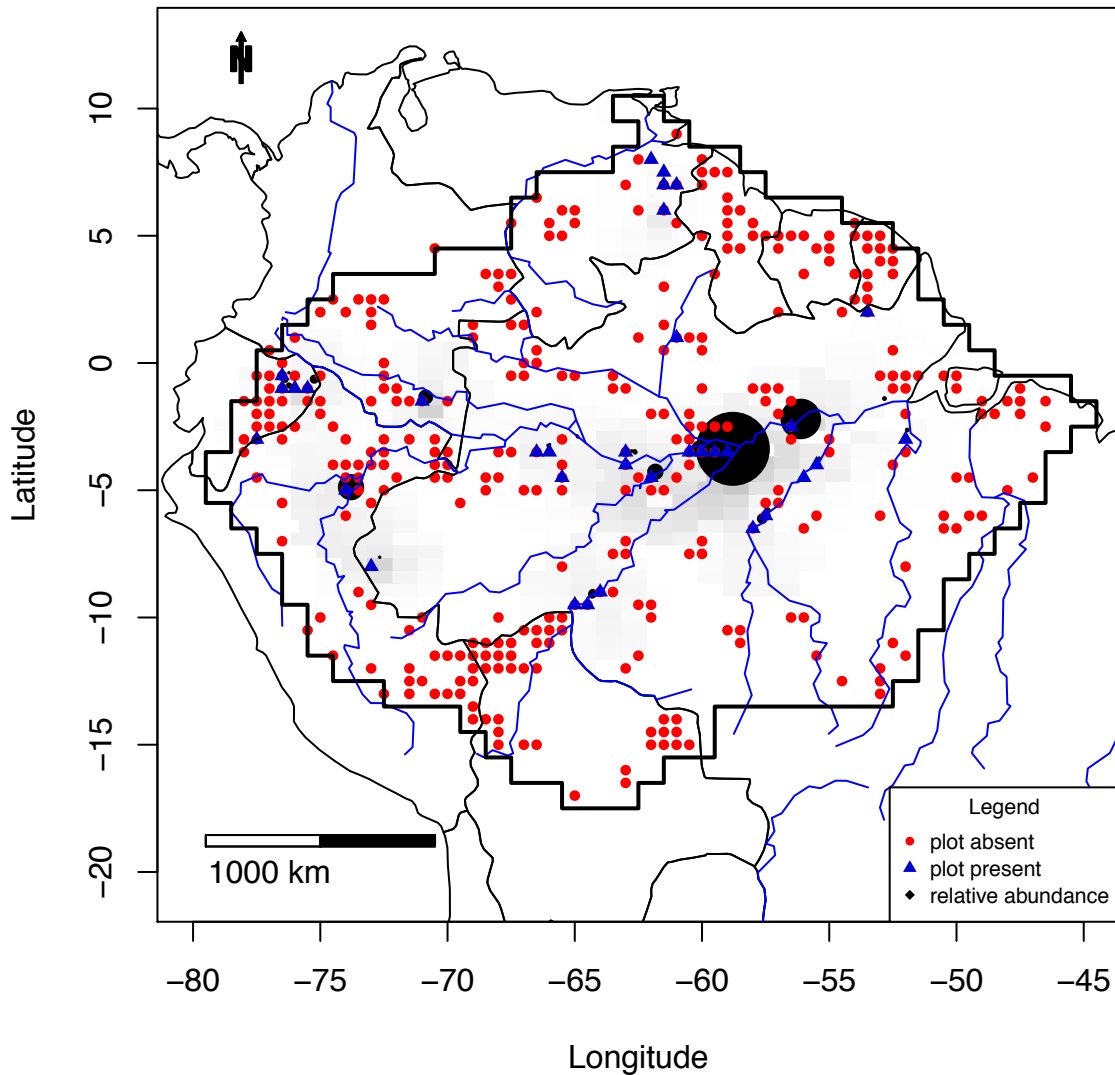

Figure S3\_161A Combined map of *Vatairea guianensis*

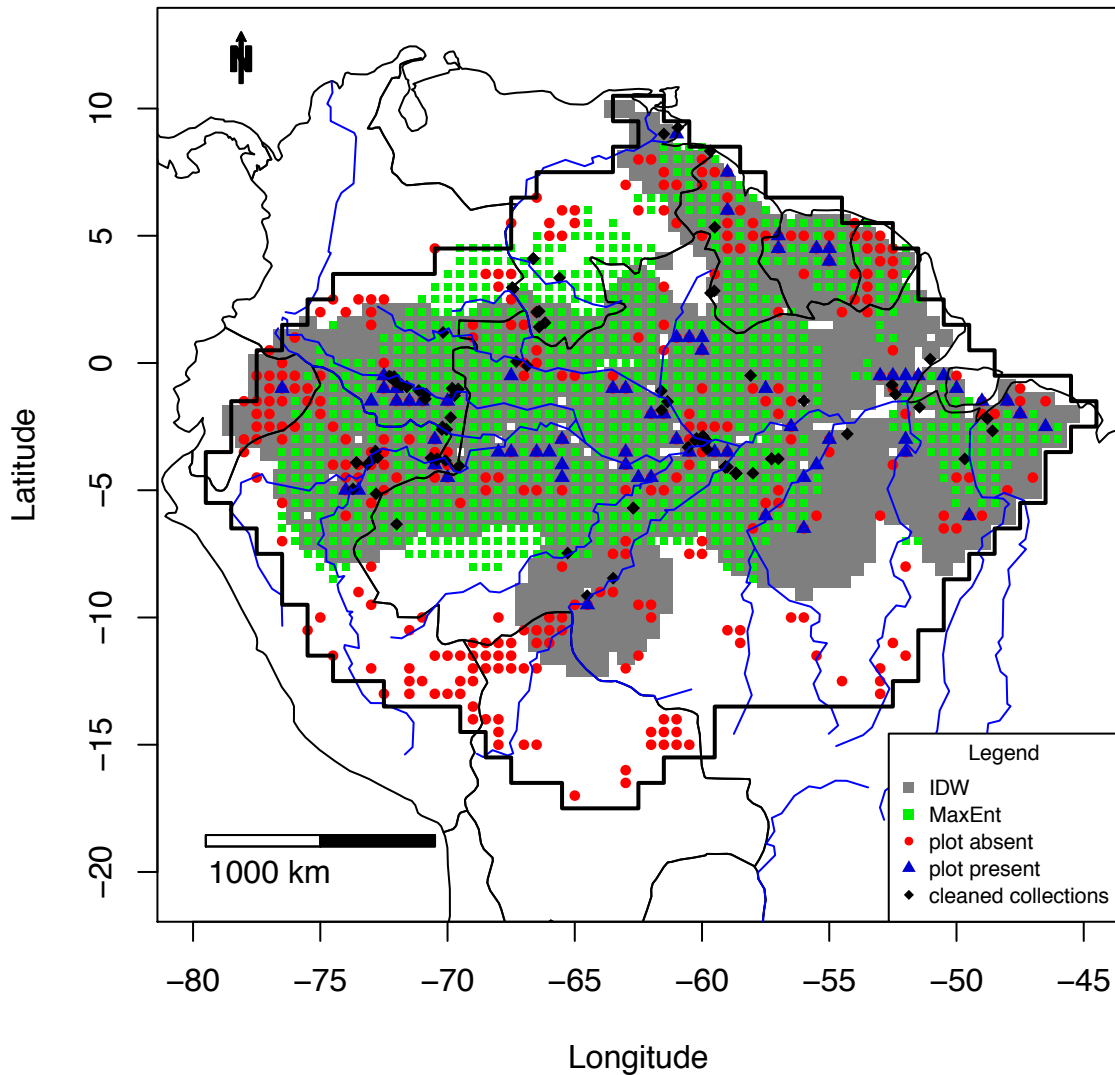

Figure S3\_161B MaxEnt map of *Vatairea guianensis*

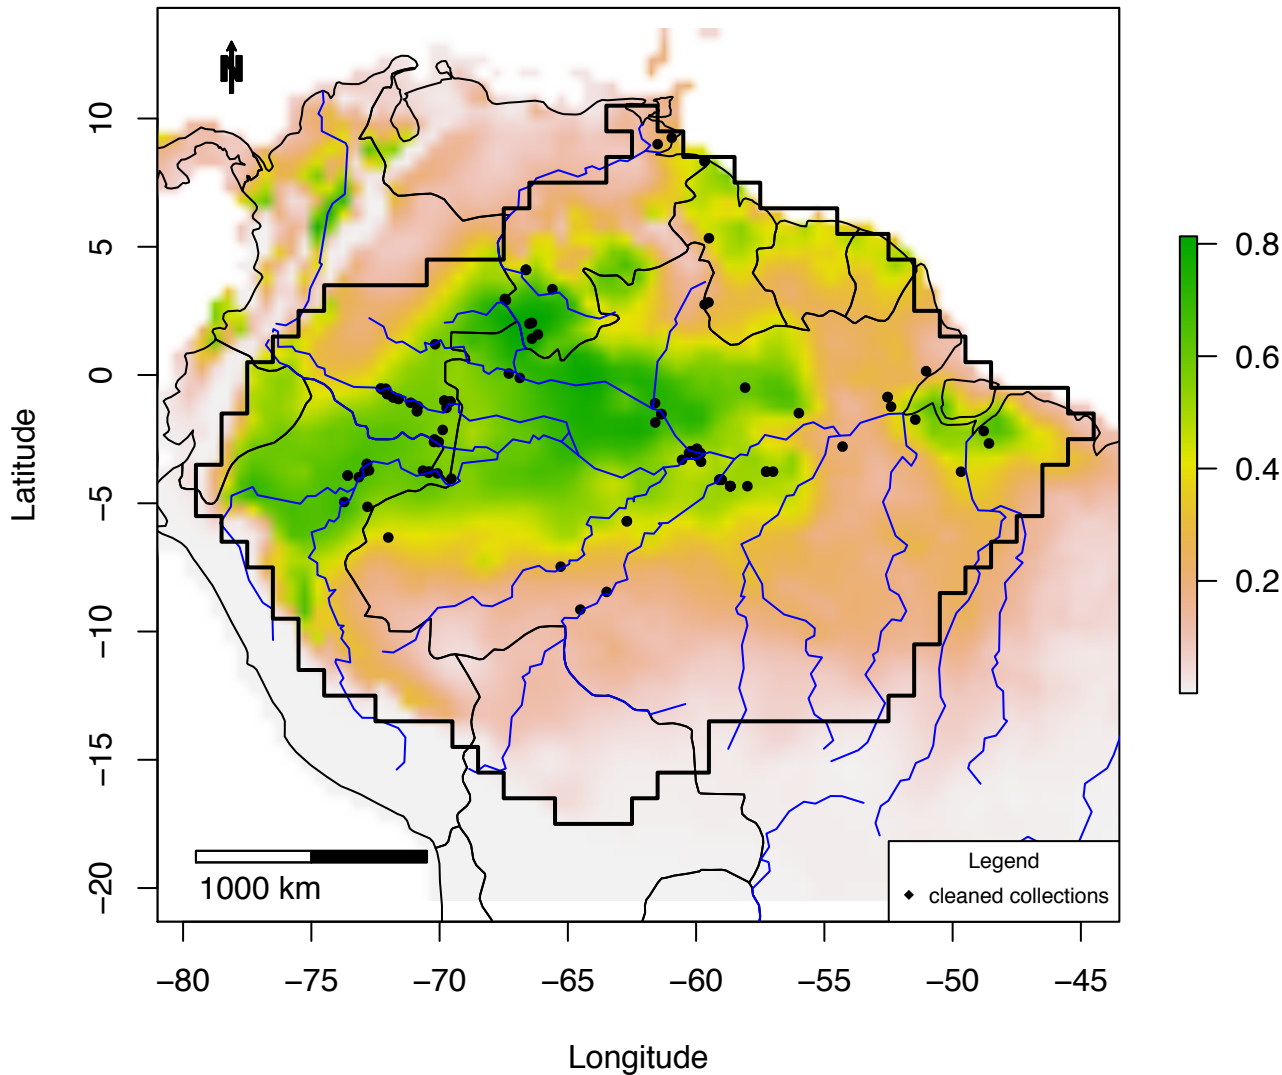

**Figure S3\_161C IDW map of *Vatairea guianensis*:  
plots =0 – 0.13; IDW: 0 – 0.05**

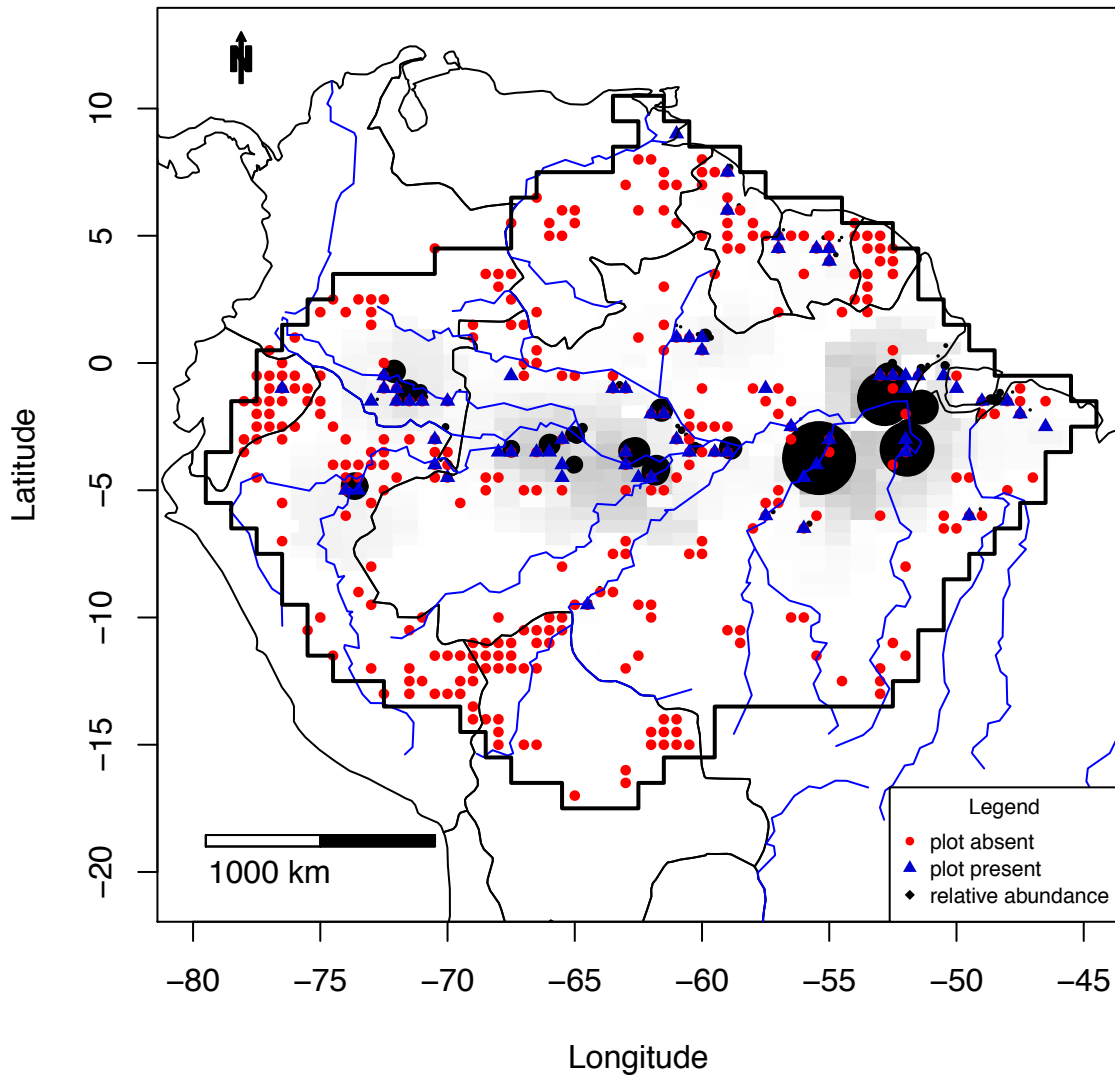

Figure S3\_162A Combined map of *Virola calophylla*

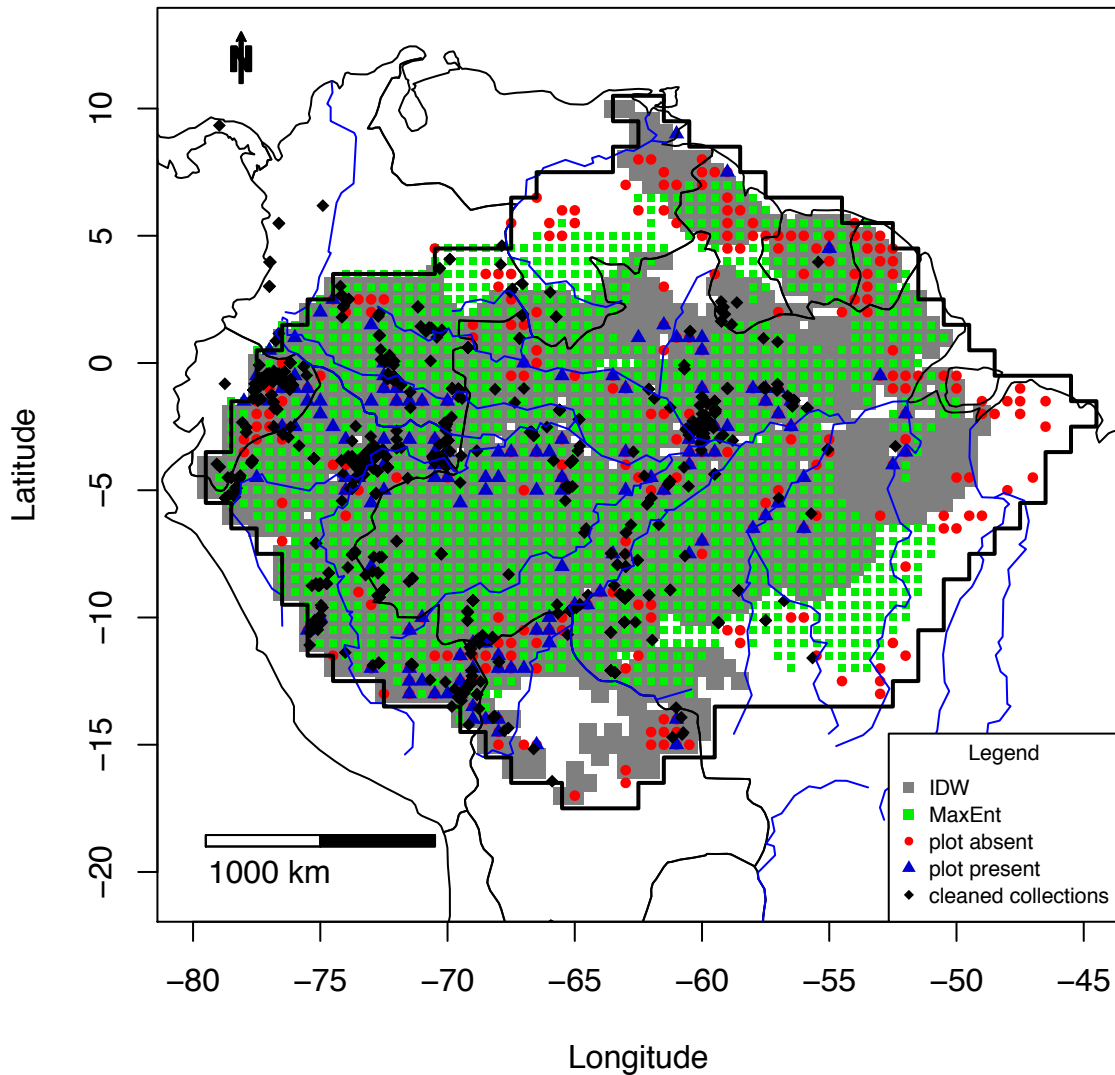

Figure S3\_162B MaxEnt map of *Virola calophylla*

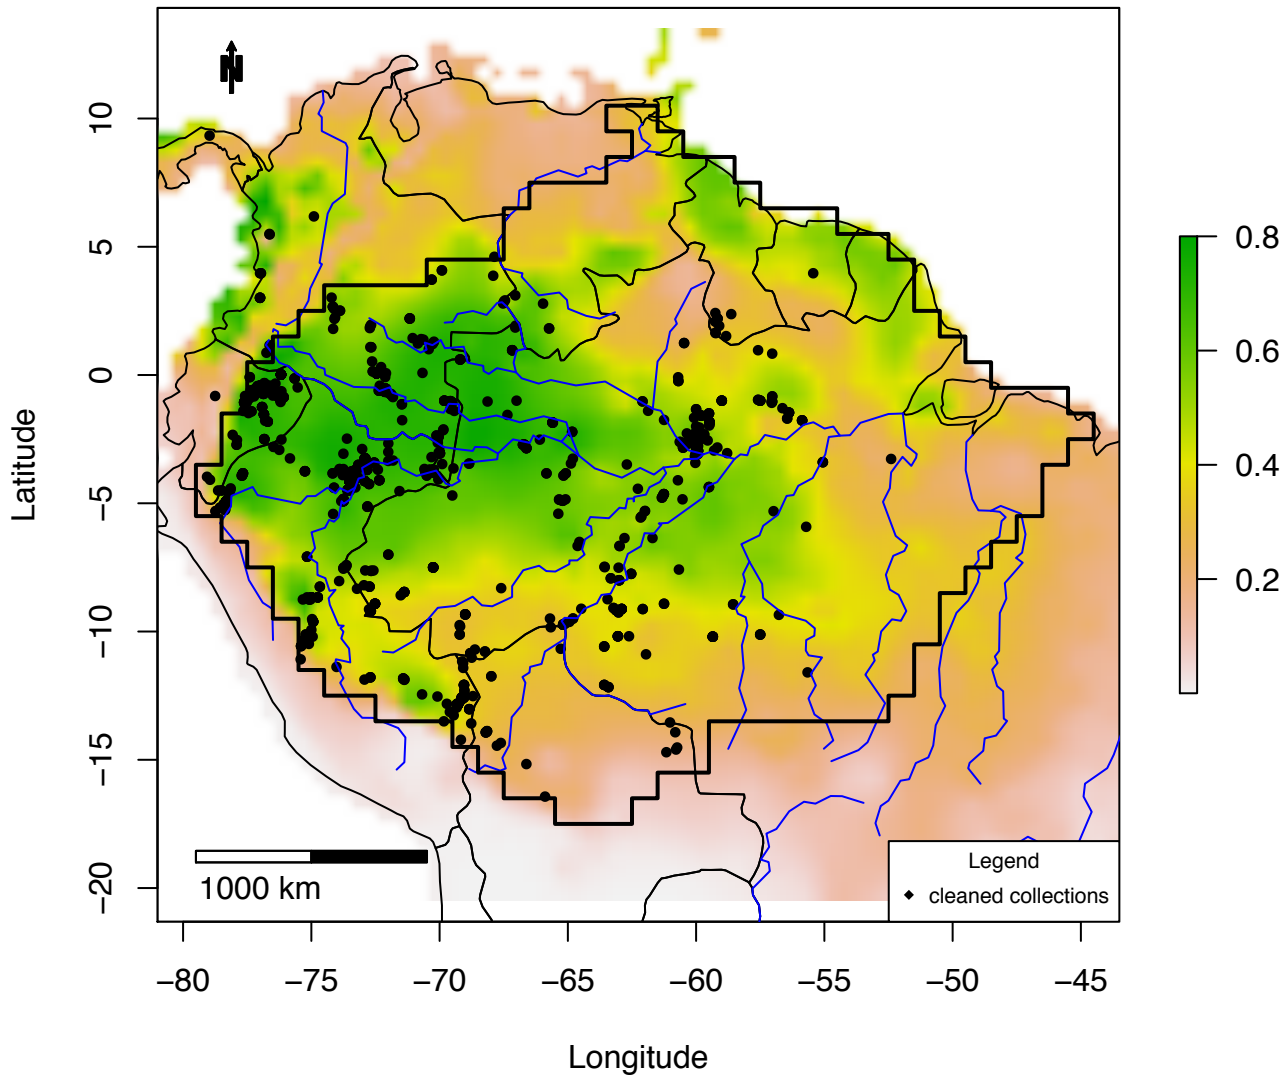

**Figure S3\_162C IDW map of *Virola calophylla*:**  
**plots =0 – 0.2; IDW: 0 – 0.06**

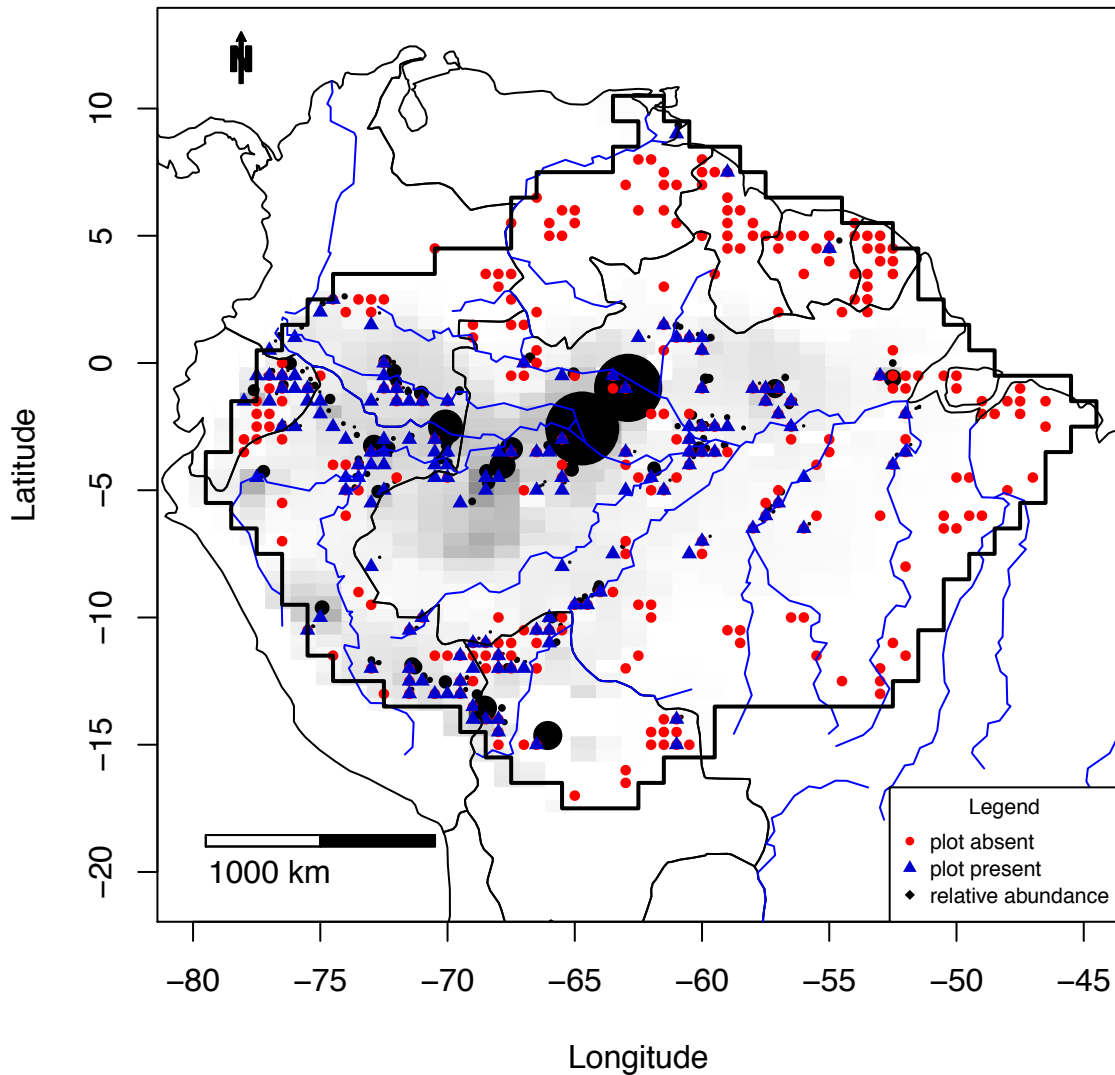

Figure S3\_163A Combined map of *Virola\_elongata*

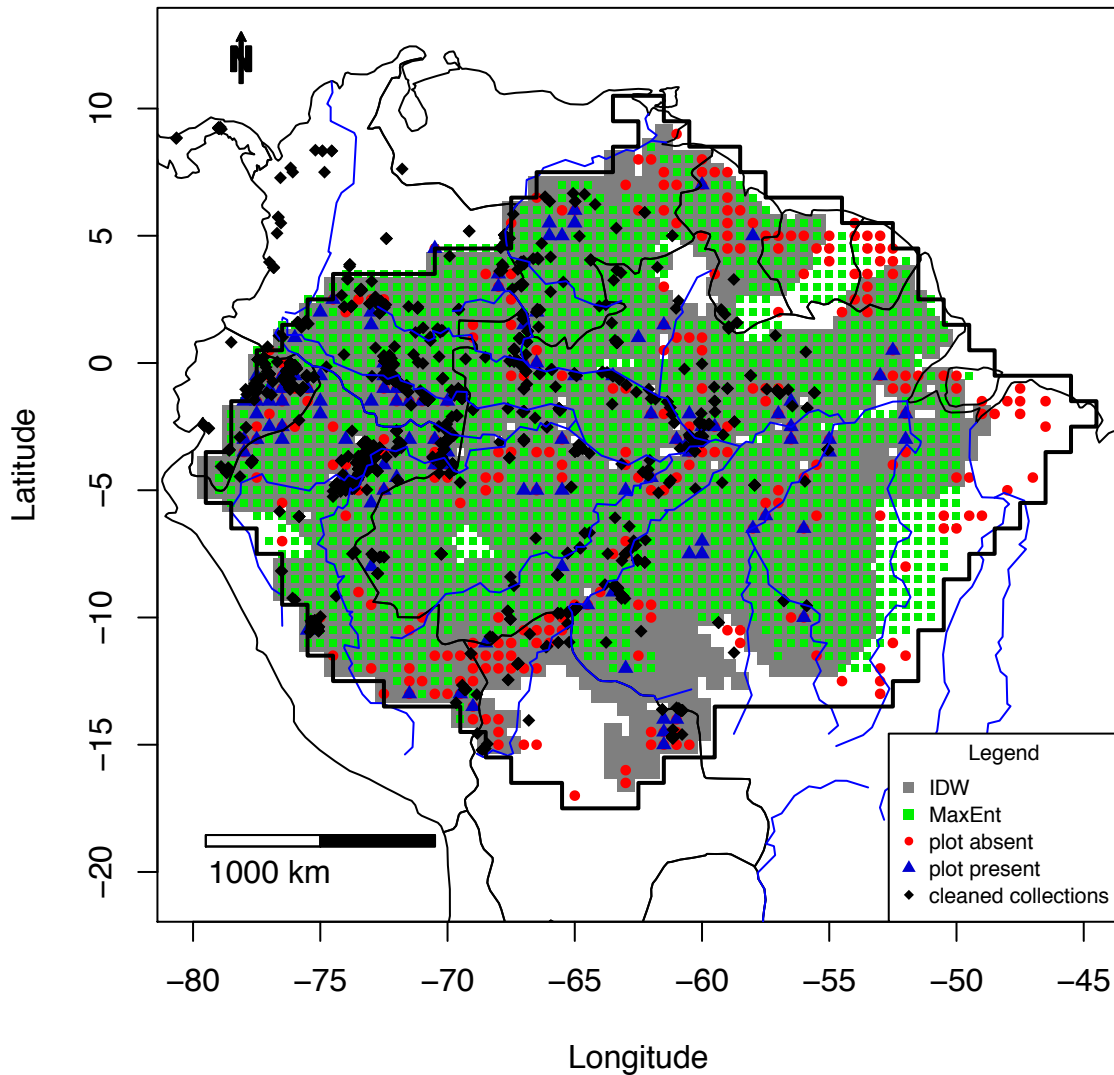



Figure S3\_163B MaxEnt map of *Virola\_elongata*

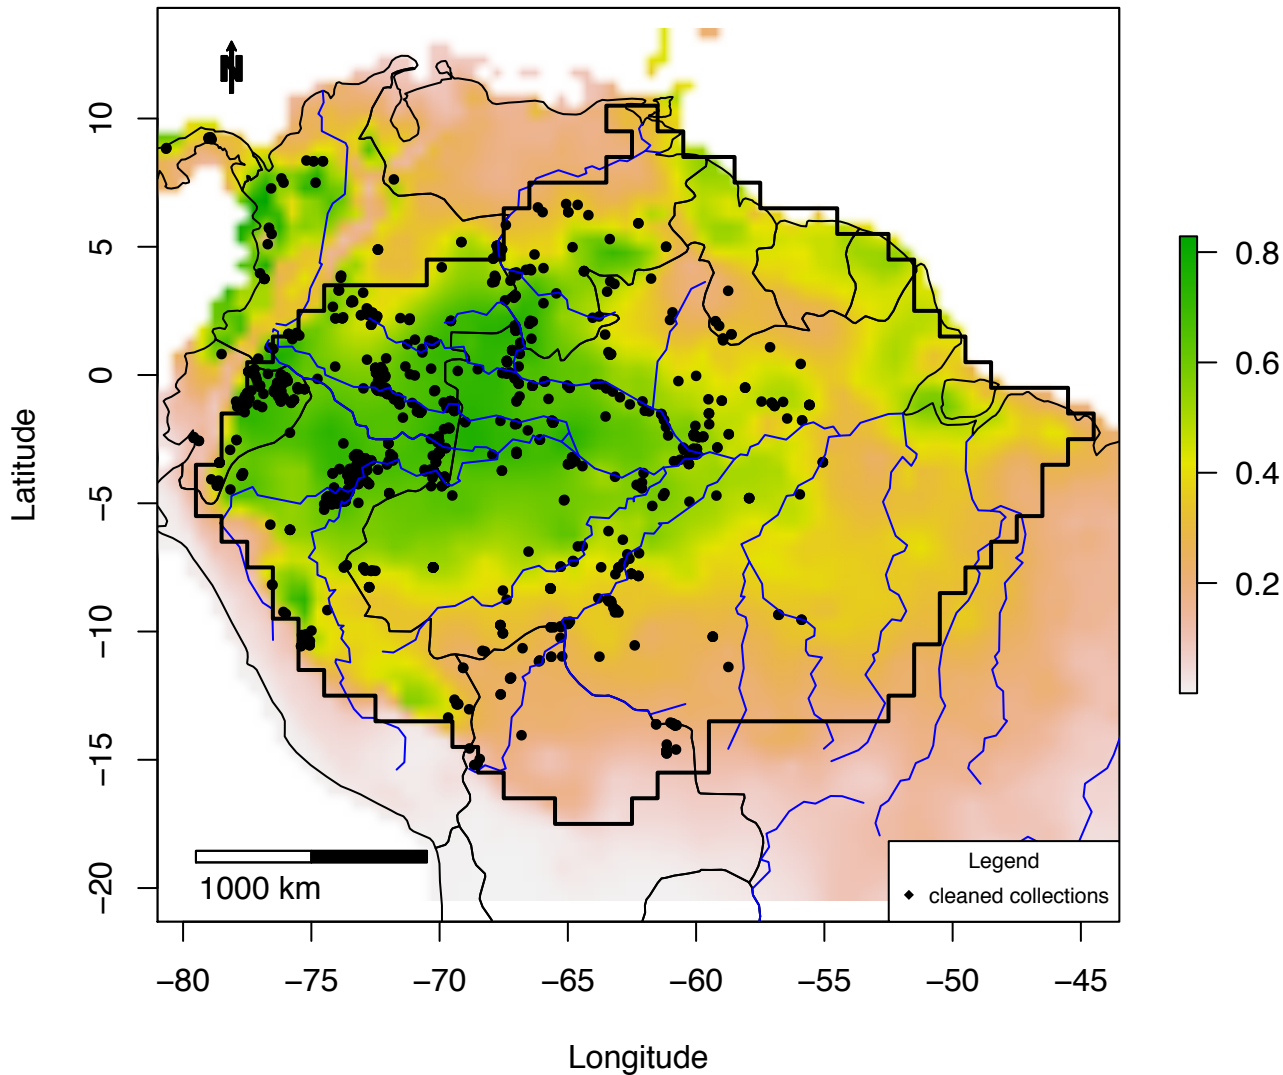

**Figure S3\_163C IDW map of *Virola elongata*:**  
**plots =0 – 0.12; IDW: 0 – 0.05**

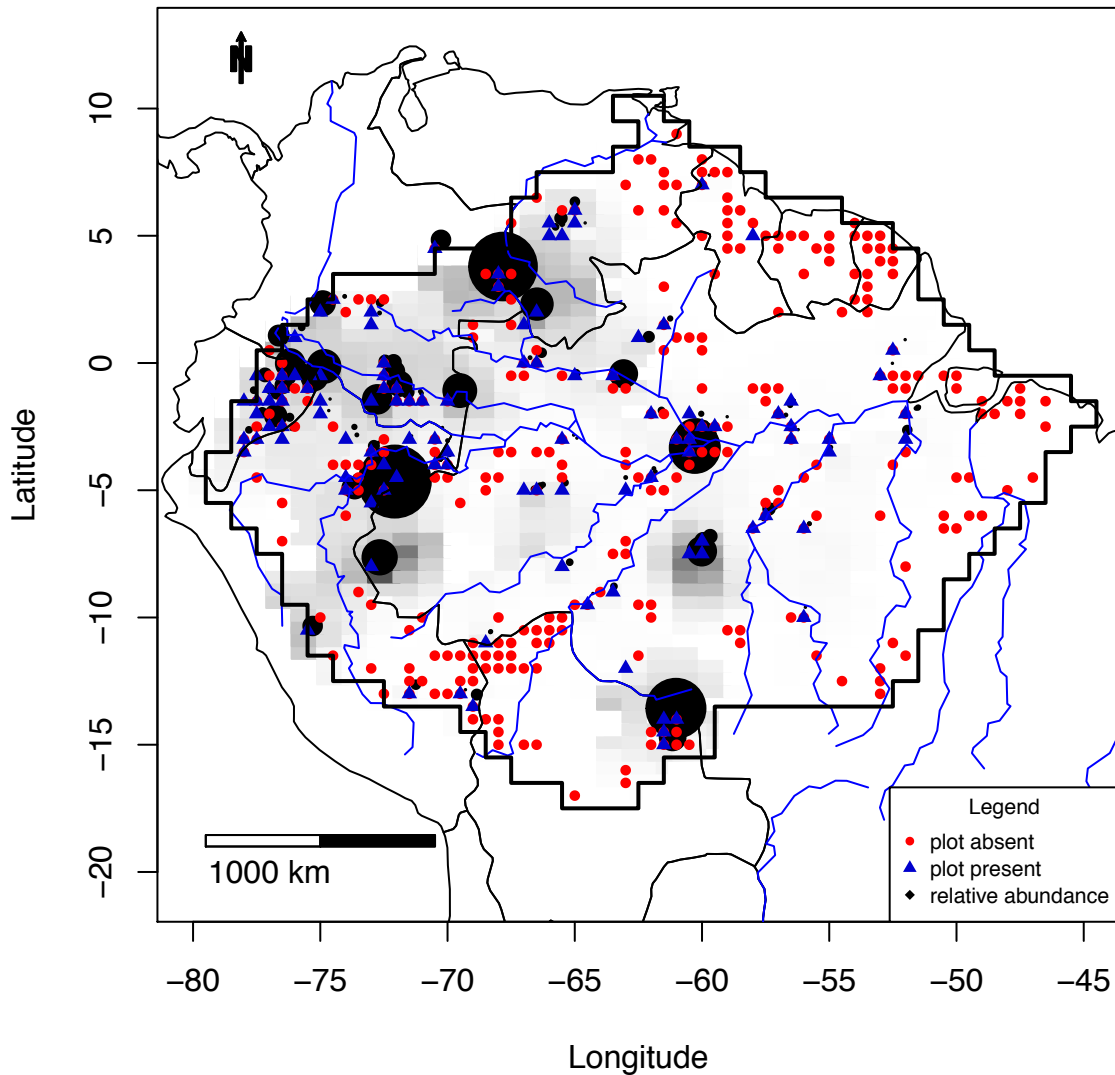

Figure S3\_164A Combined map of *Viola\_michelii*

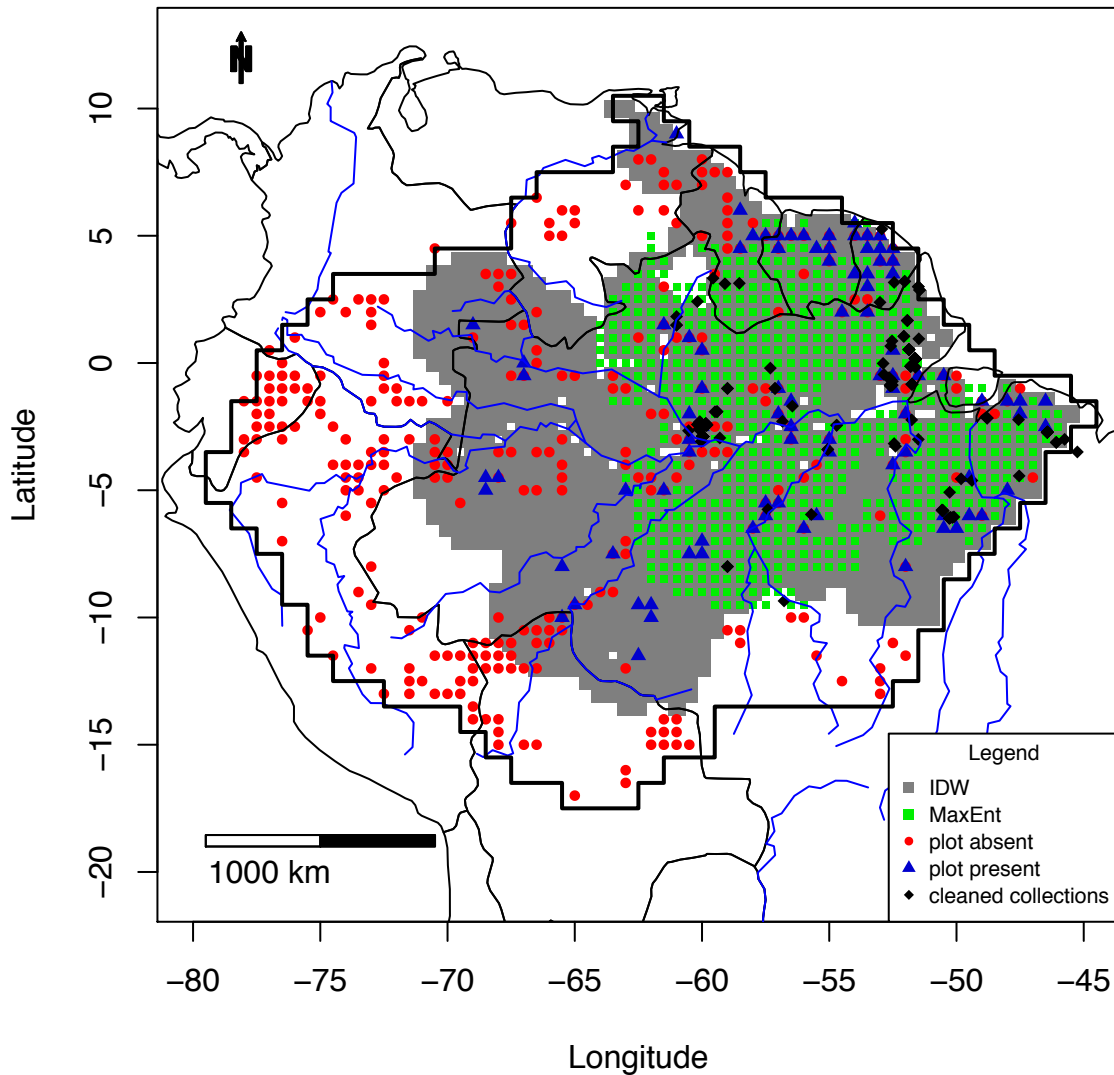

Figure S3\_164B MaxEnt map of *Virola\_michelii*

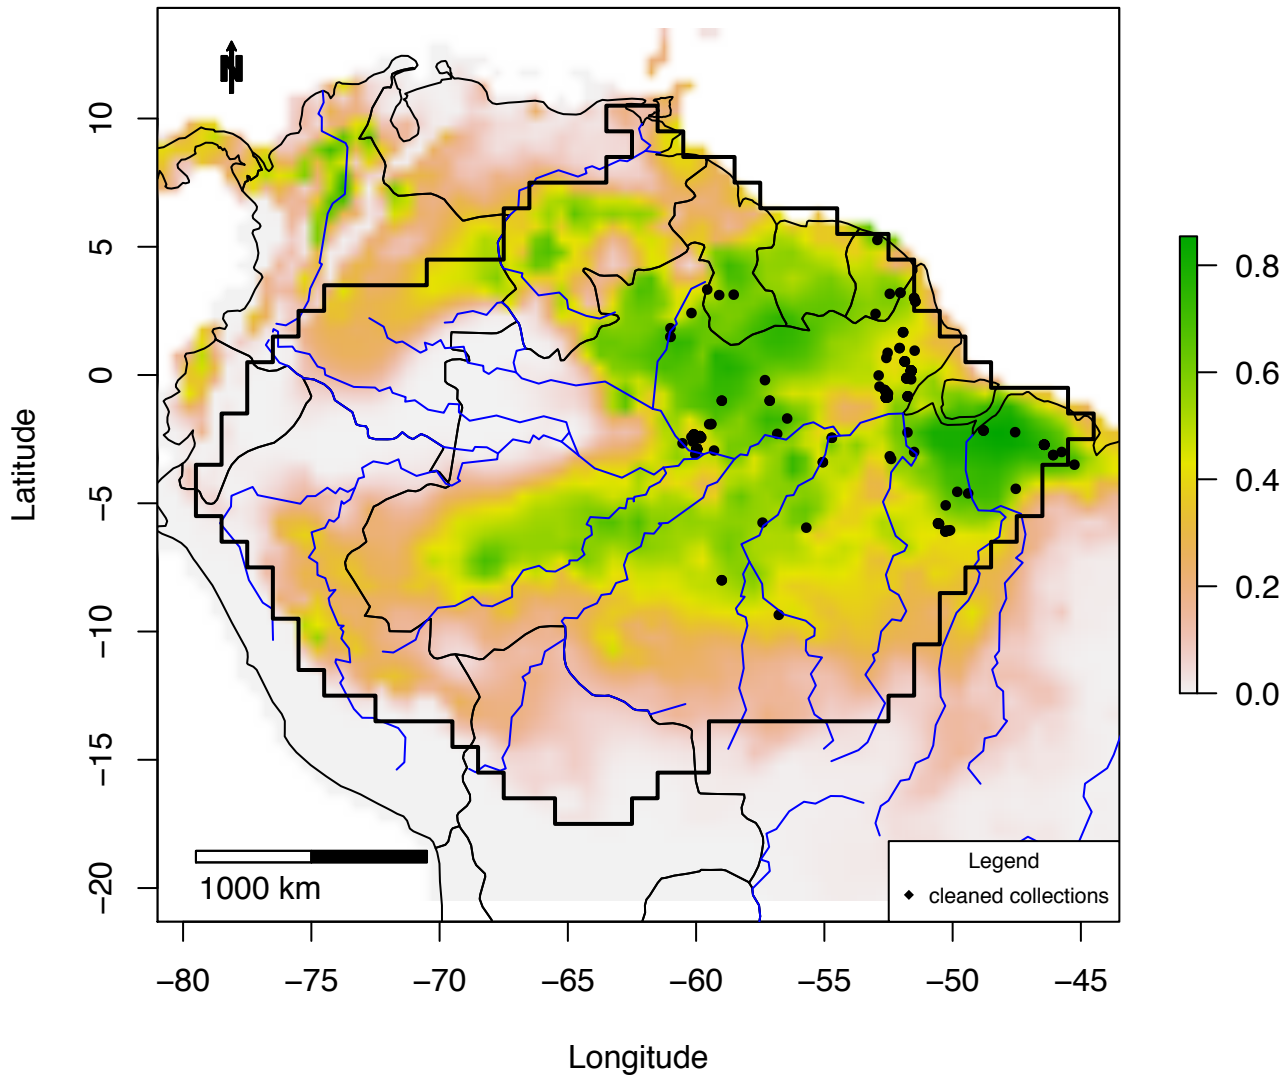

**Figure S3\_164C IDW map of *Viola michelii*:**  
plots =0 – 0.07; IDW: 0 – 0.04

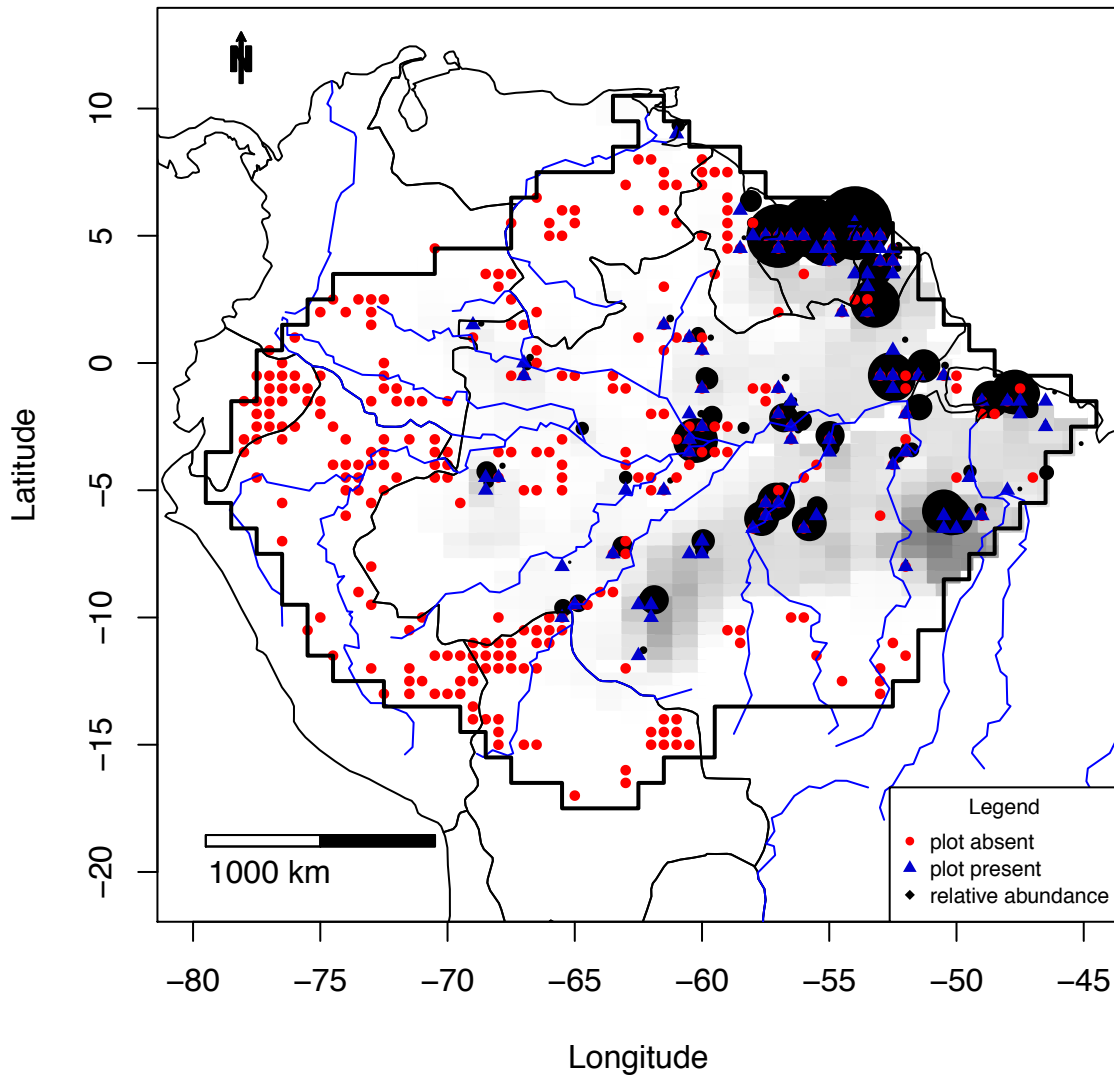

Figure S3\_165A Combined map of *Viola pavonis*

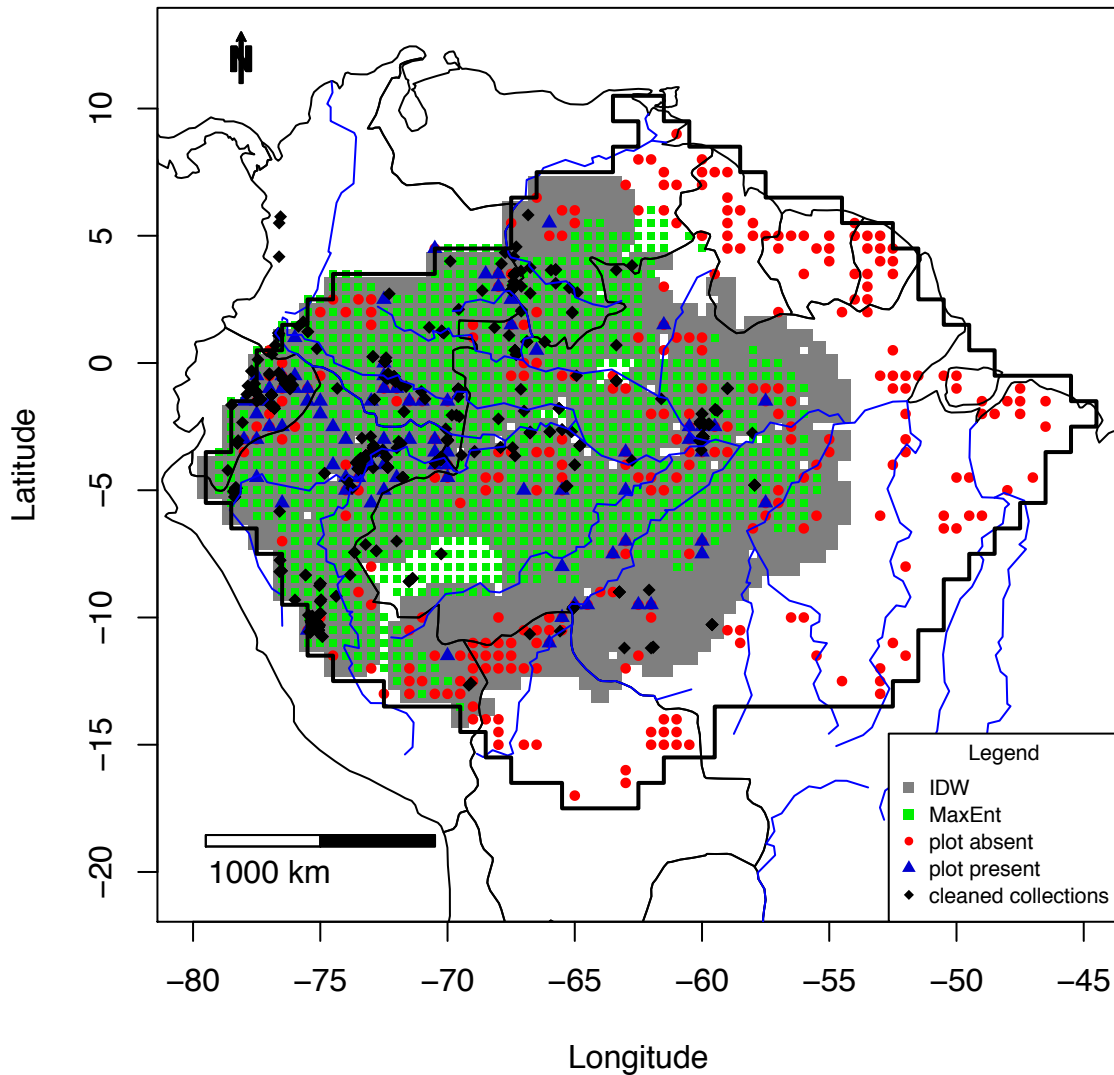

Figure S3\_165B MaxEnt map of *Virola pavonis*

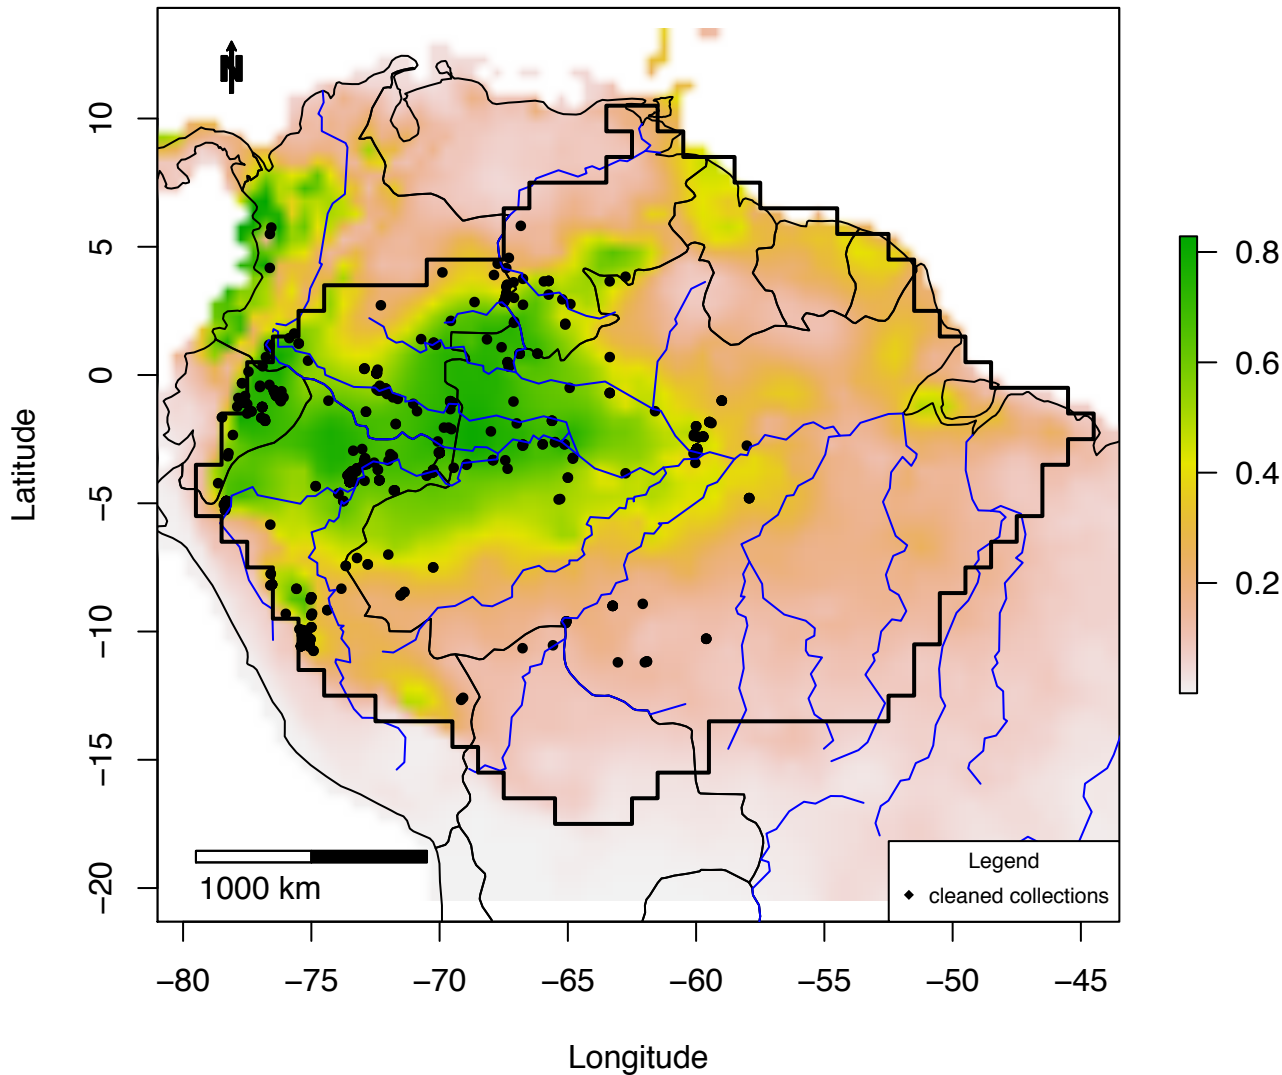

**Figure S3\_165C IDW map of *Viola pavonis*:**  
**plots =0 – 0.12; IDW: 0 – 0.05**

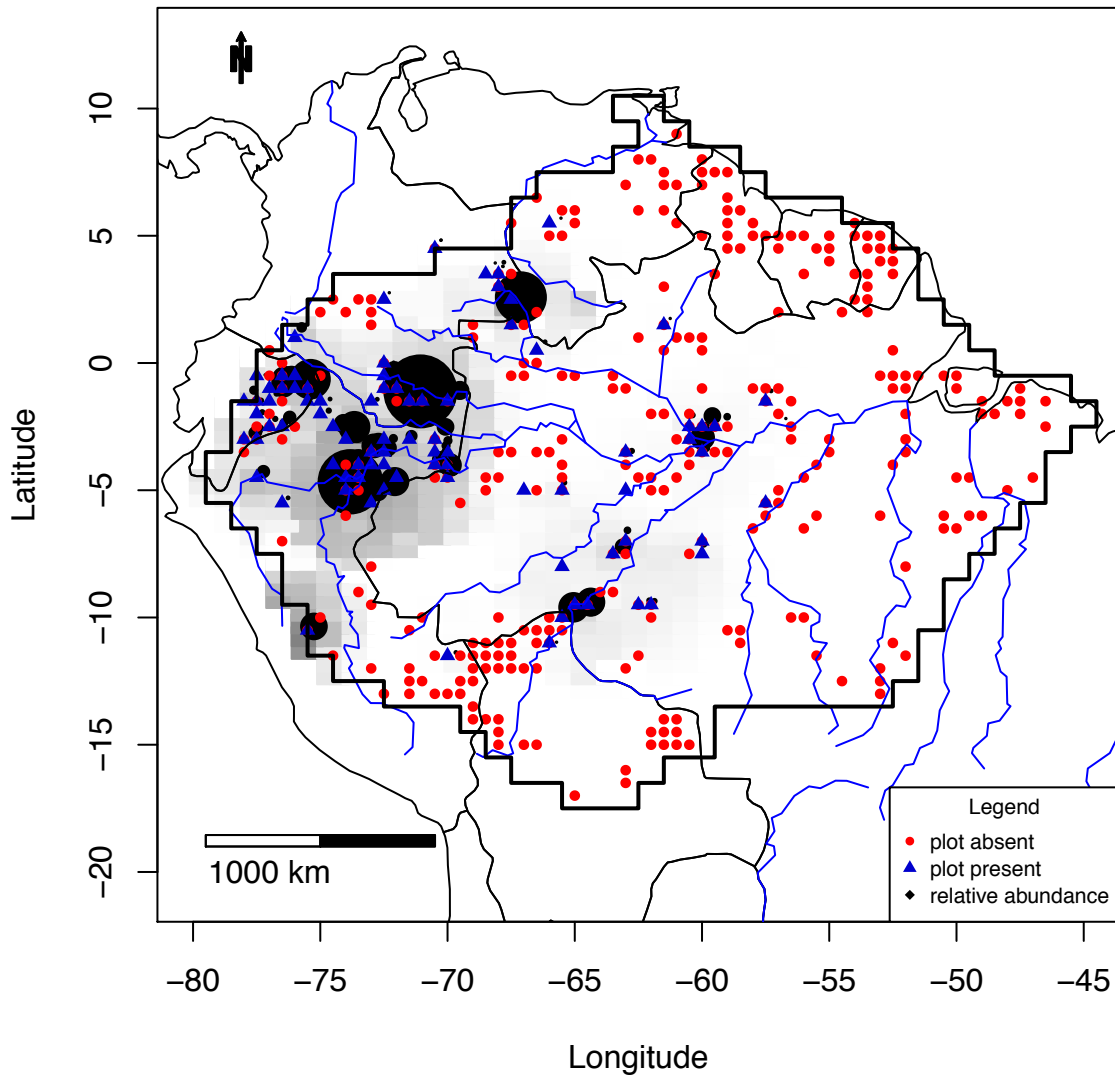



Figure S3\_166A Combined map of *Virola\_surinamensis*

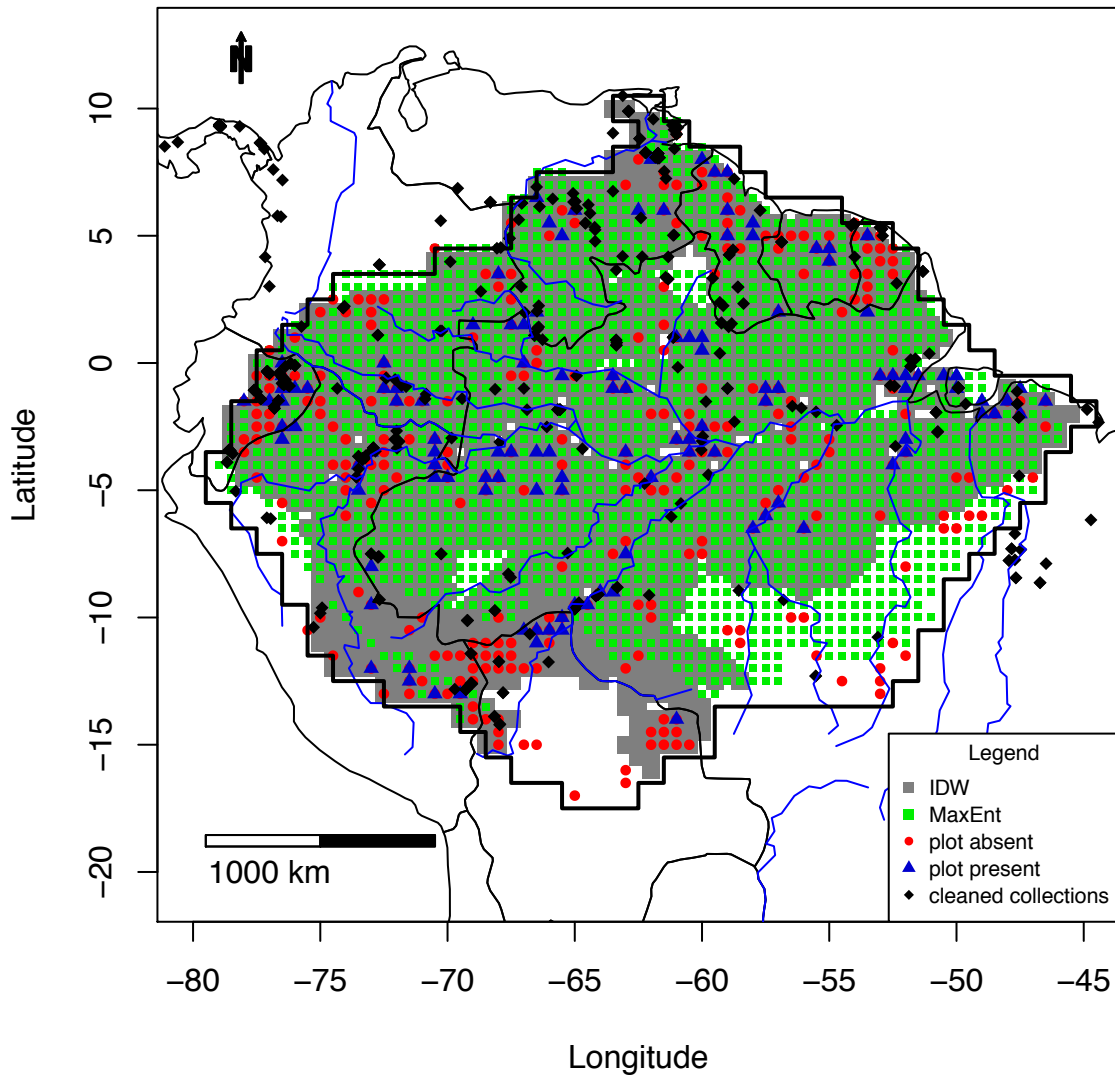

Figure S3\_166B MaxEnt map of *Virola\_surinamensis*

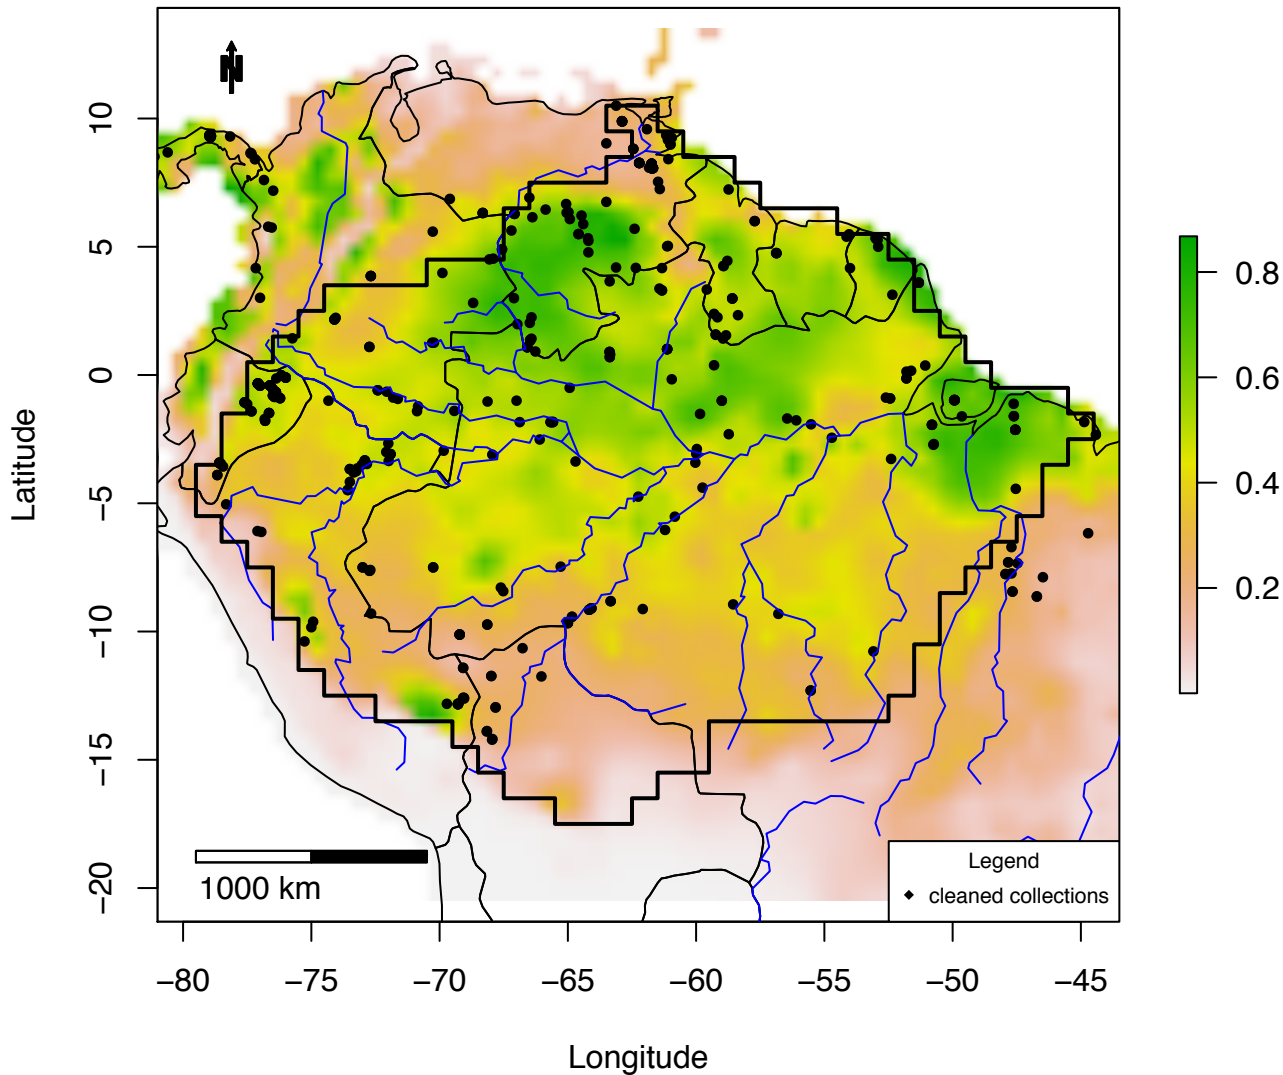

**Figure S3\_166C IDW map of *Virola surinamensis*:  
plots =0 – 0.39; IDW: 0 – 0.09**

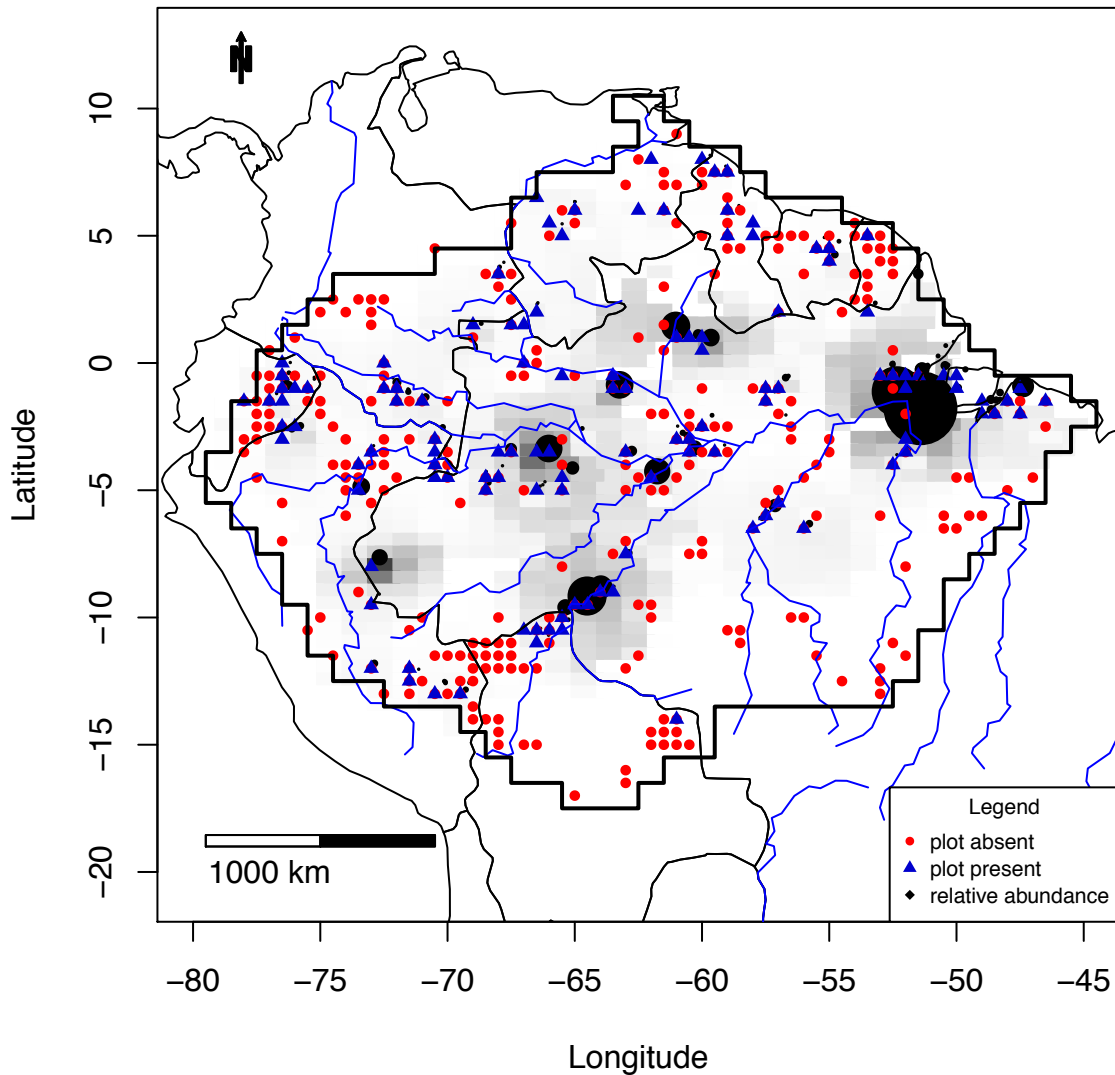

Figure S3\_167A Combined map of *Vouacapoua americana*

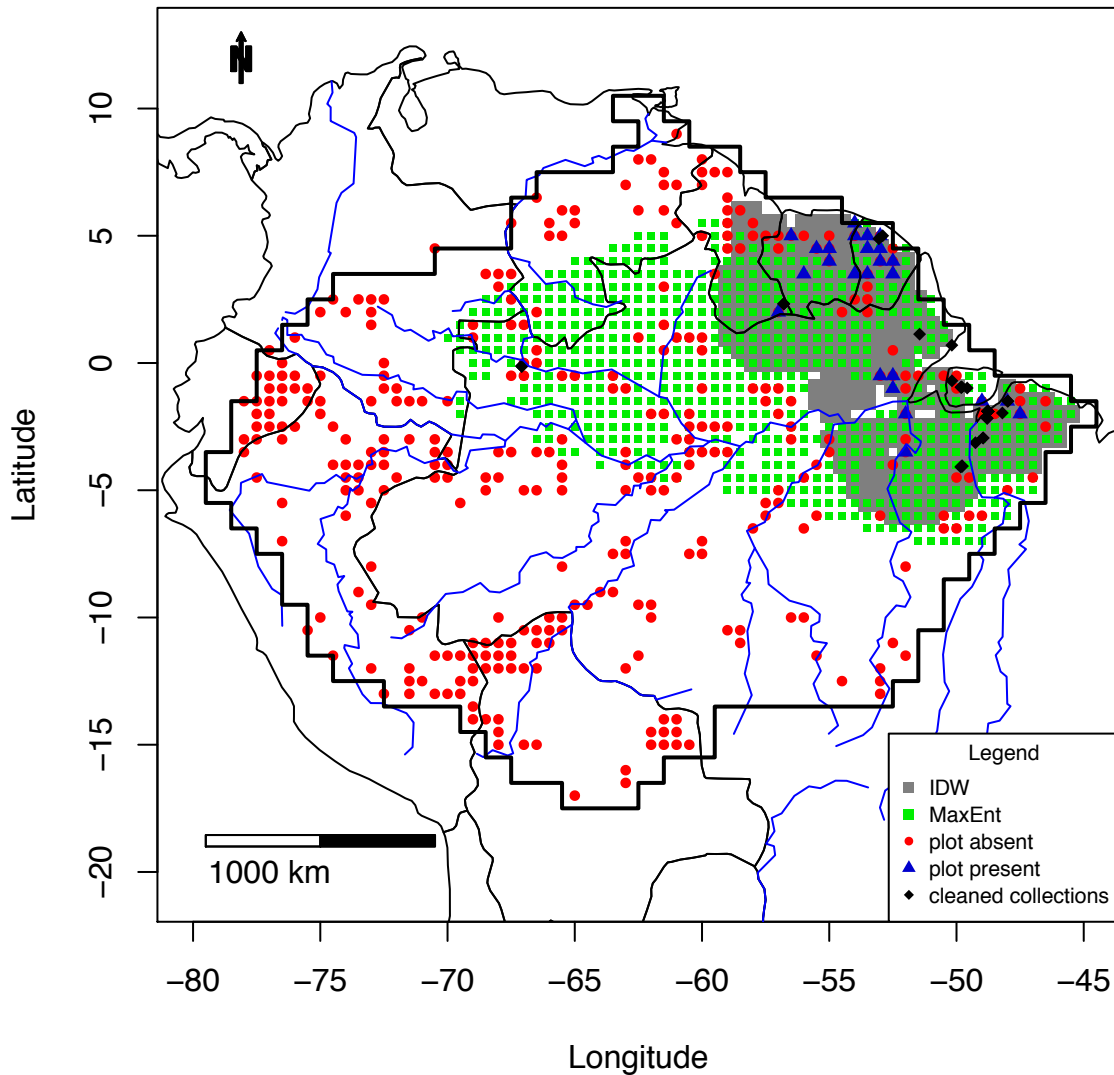

Figure S3\_167B MaxEnt map of *Vouacapoua americana*

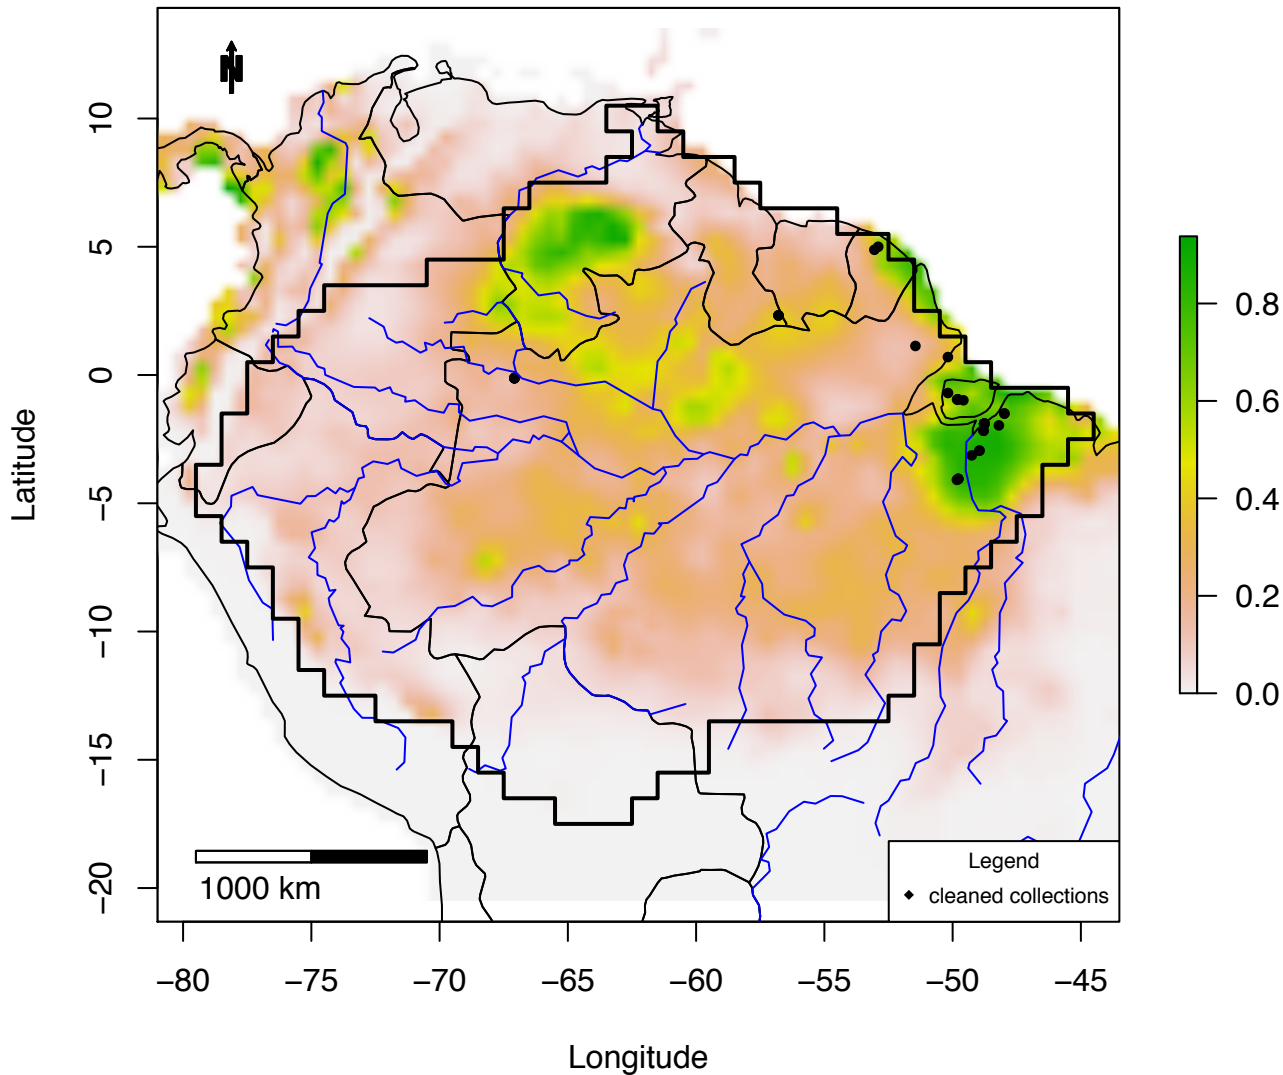

Figure S3\_167C IDW map of *Vouacapoua americana*:  
plots = 0 – 0.08; IDW: 0 – 0.03

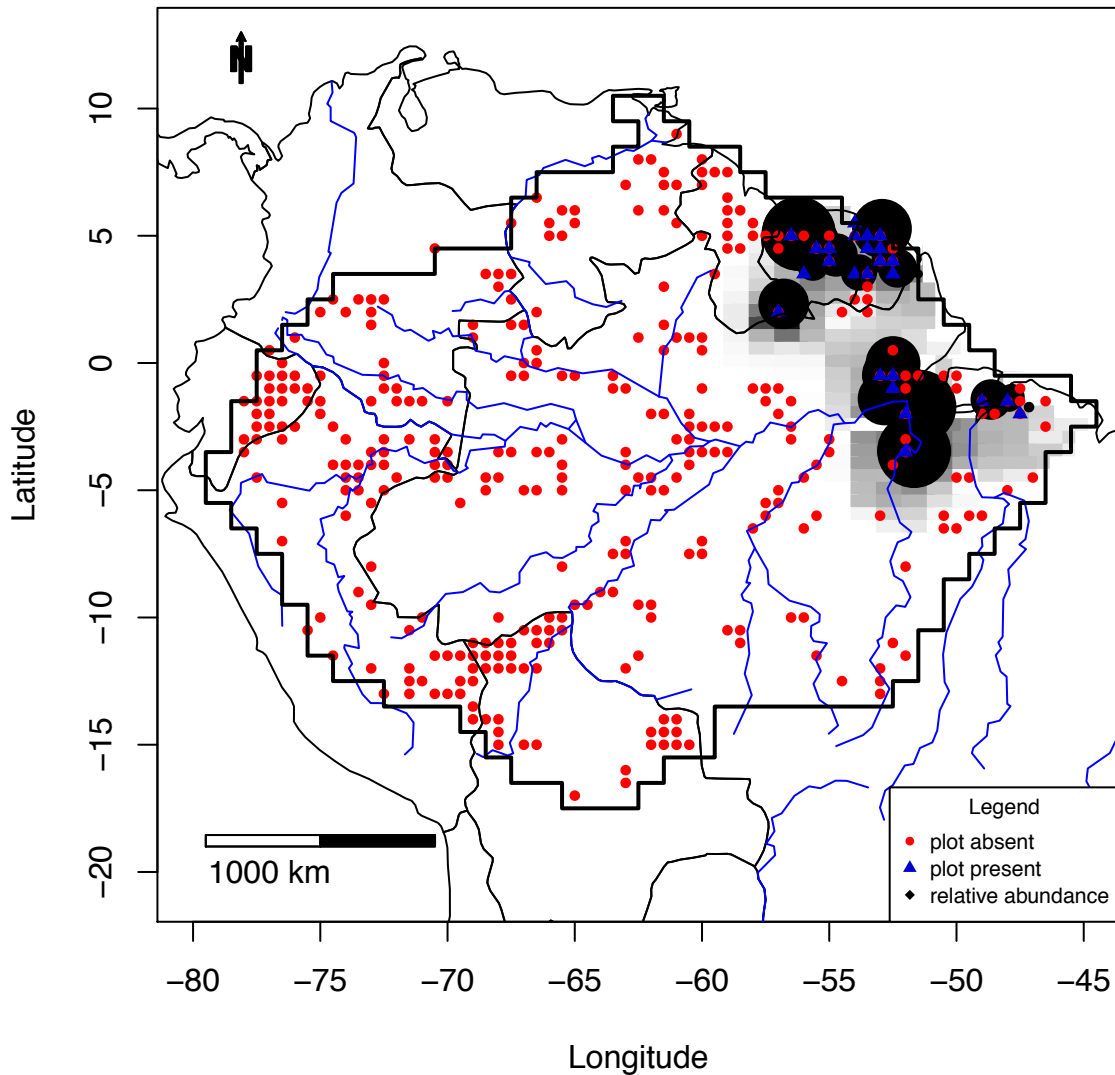

Figure S3\_168A Combined map of *Xylopia amazonica*

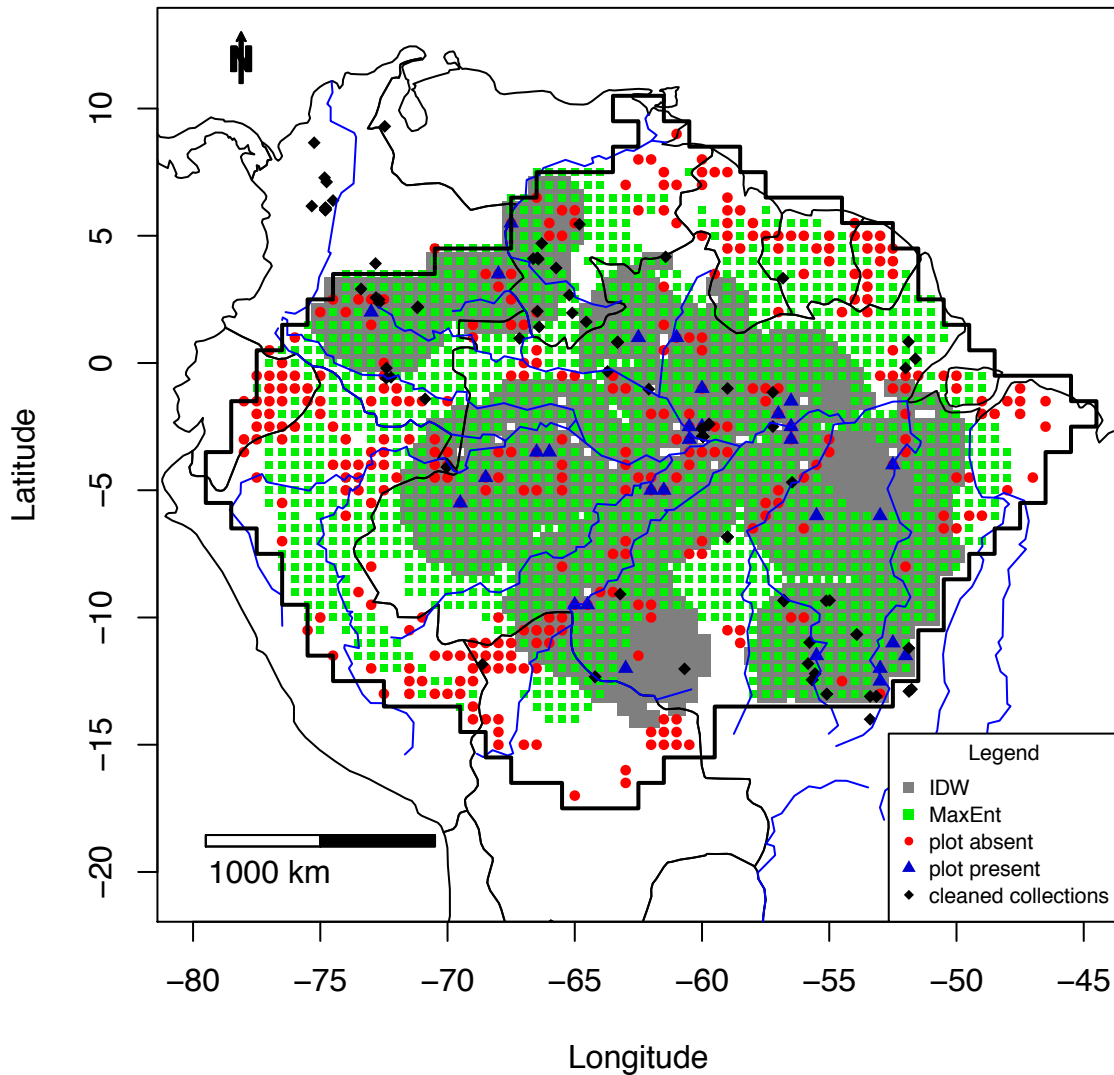

Figure S3\_168B MaxEnt map of *Xylopia amazonica*

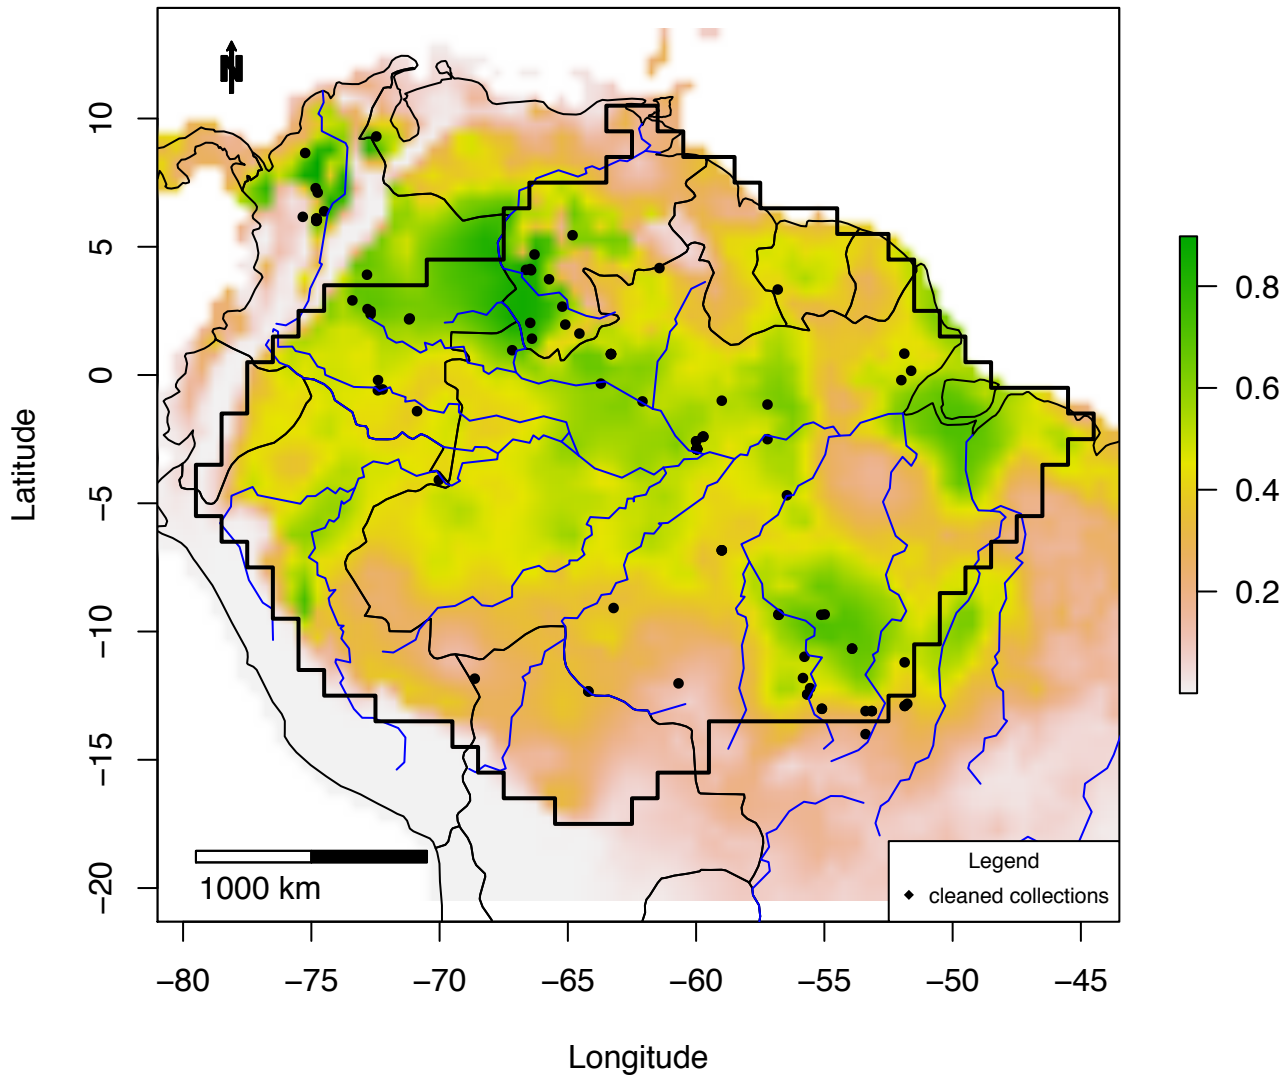



Figure S3\_168C IDW map of *Xylopia amazonica*:  
plots = 0 – 0.13; IDW: 0 – 0.06

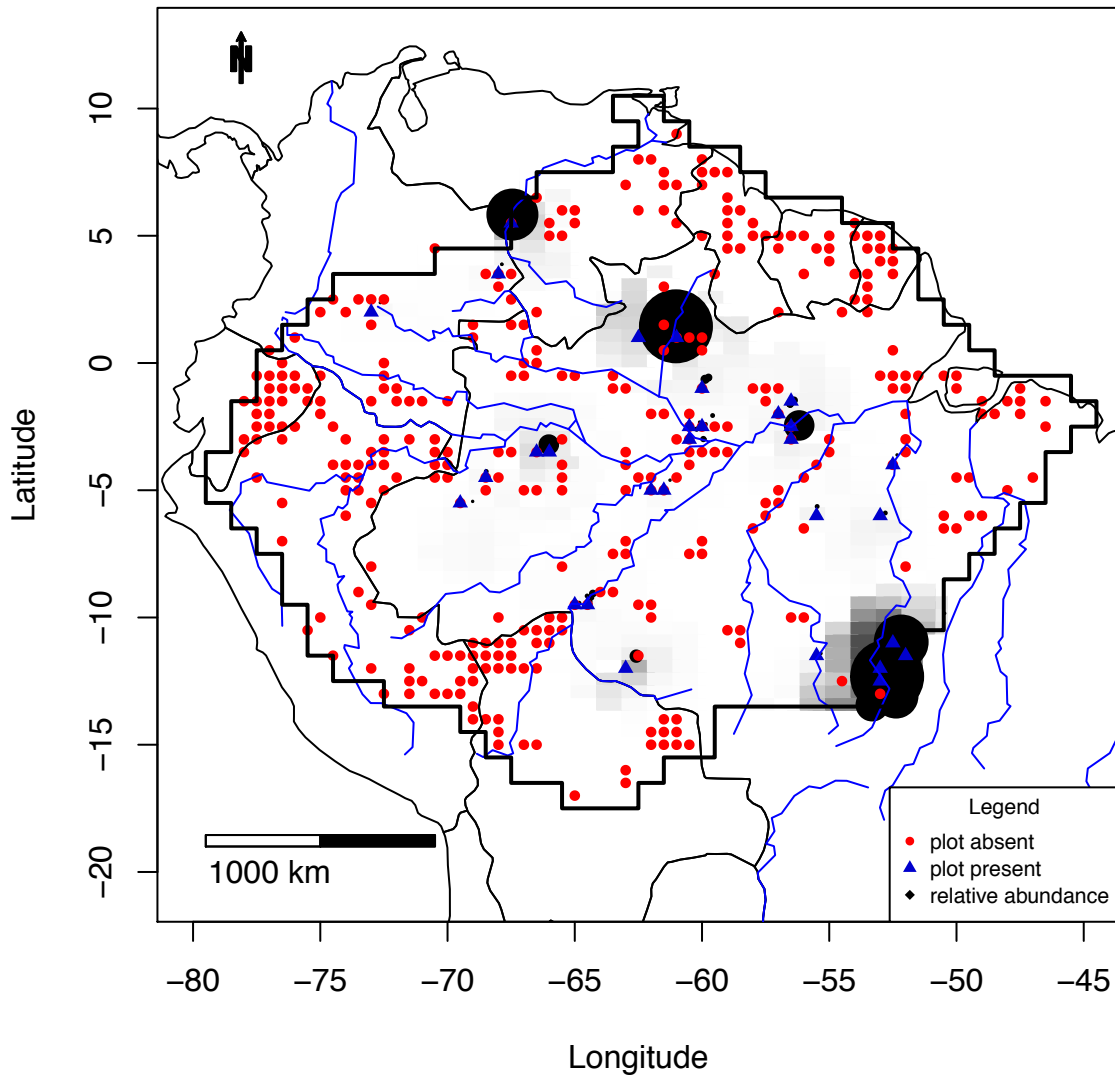

Figure S3\_169A Combined map of *Zygia\_cataractae*

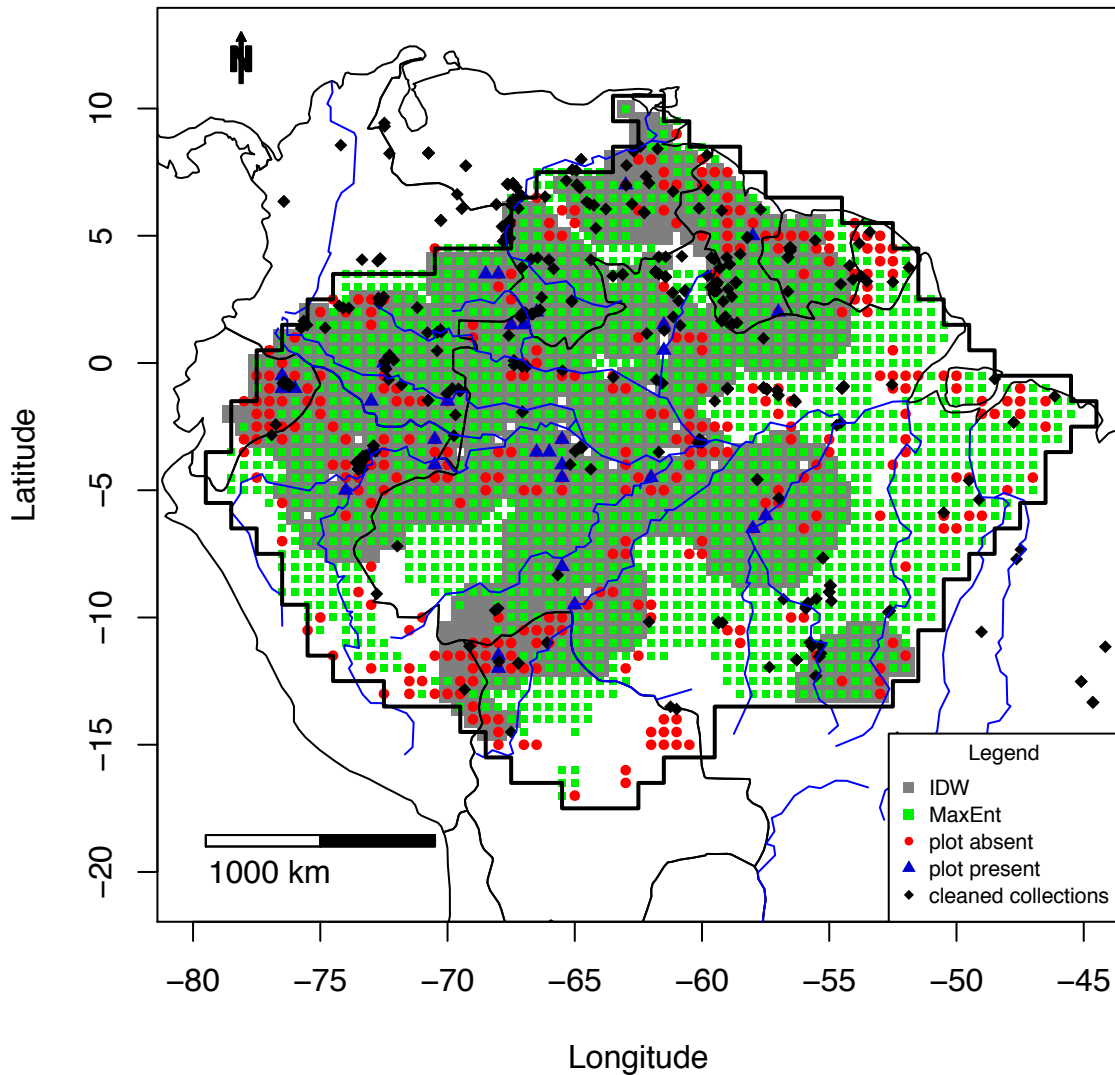

Figure S3\_169B MaxEnt map of *Zygia\_cataractae*

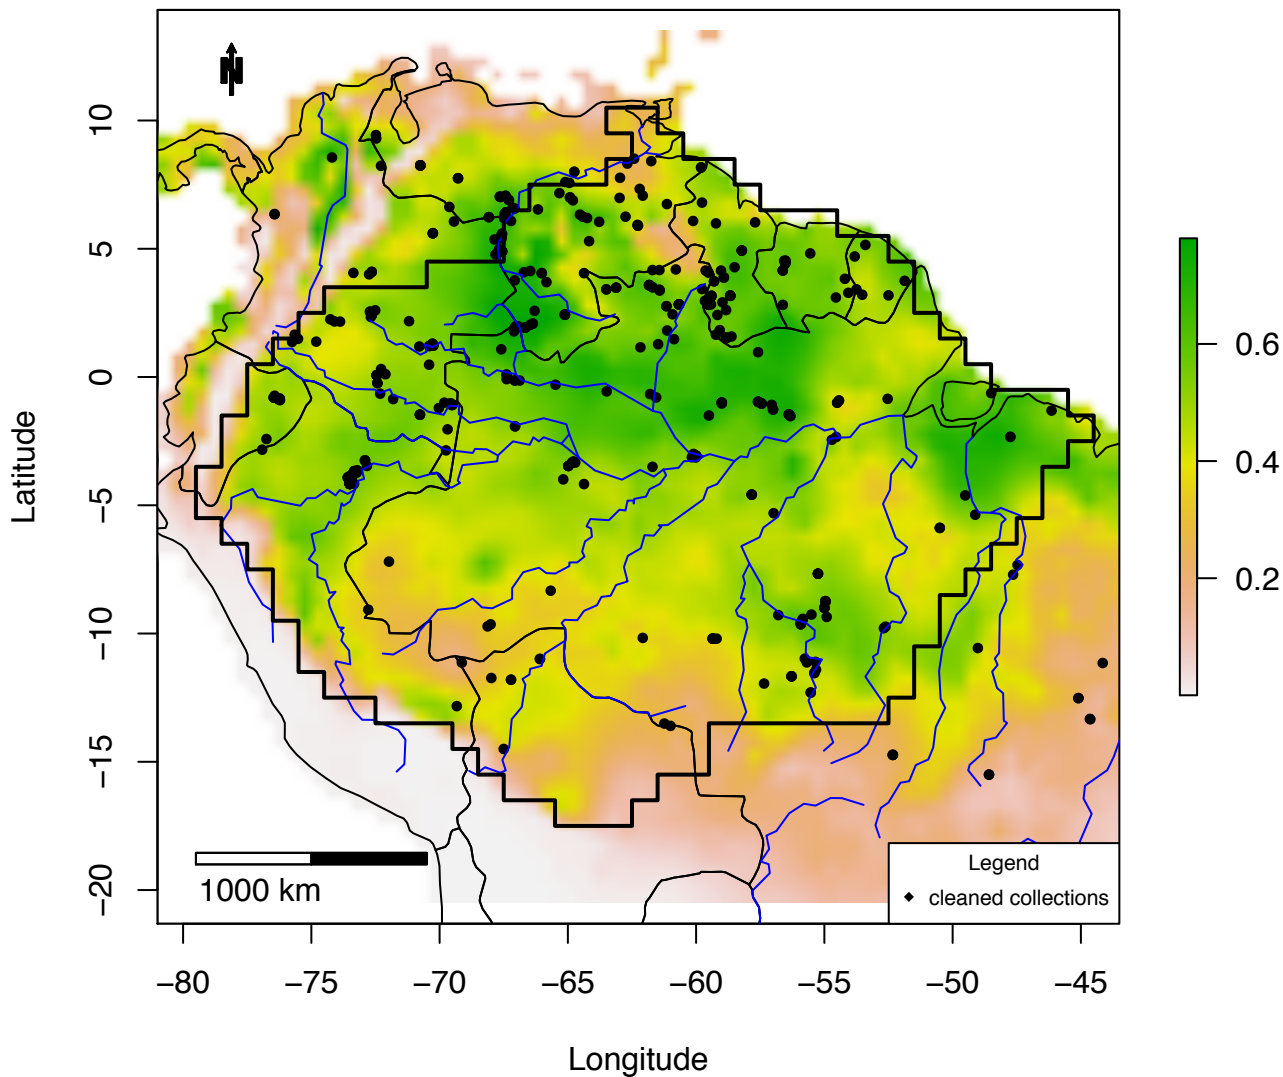

Figure S3\_169C IDW map of *Zygia cataractae*:  
plots = 0 – 0.23; IDW: 0 – 0.04

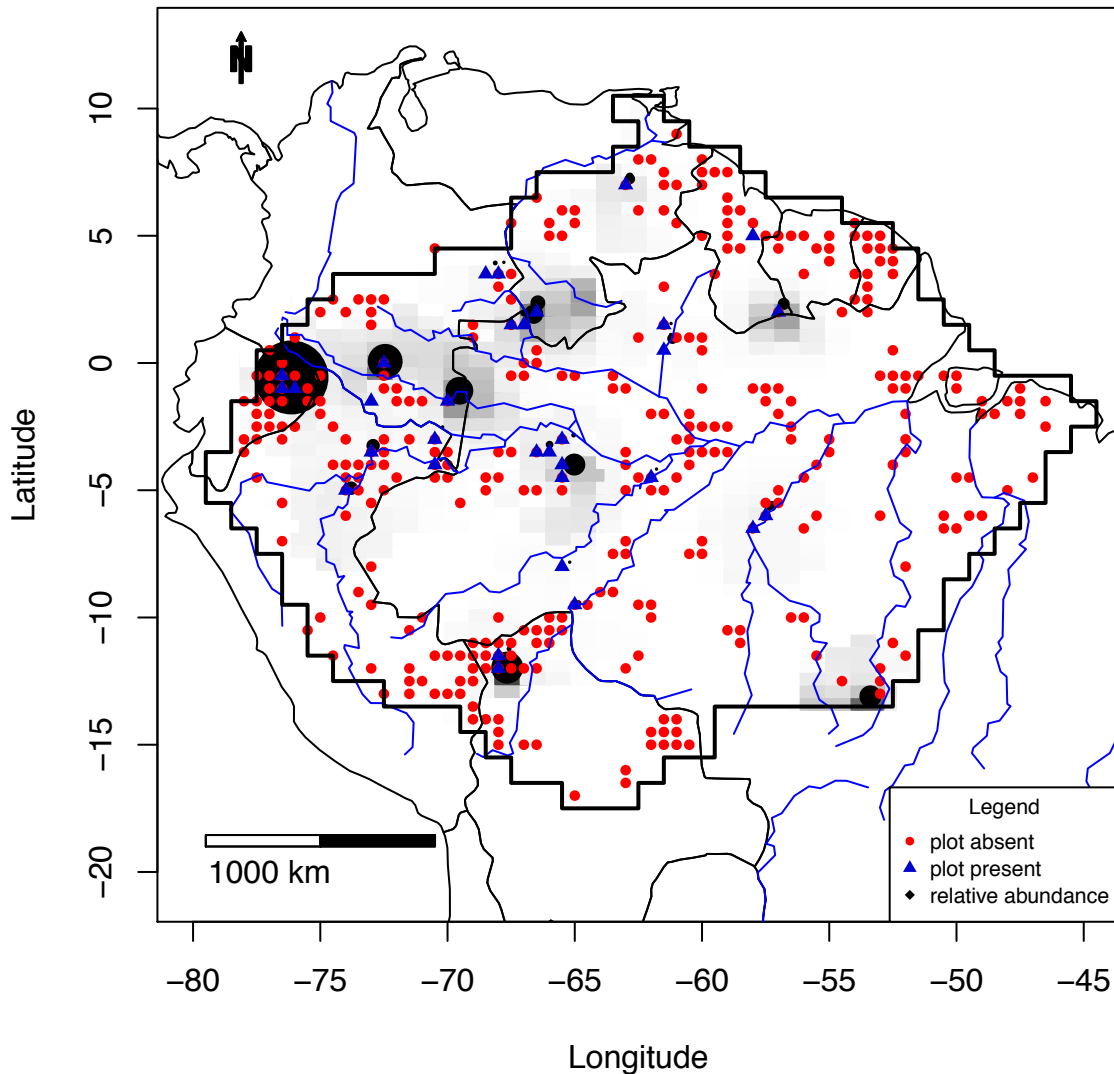

Figure S3\_170A Combined map of *Zygia\_racemosa*

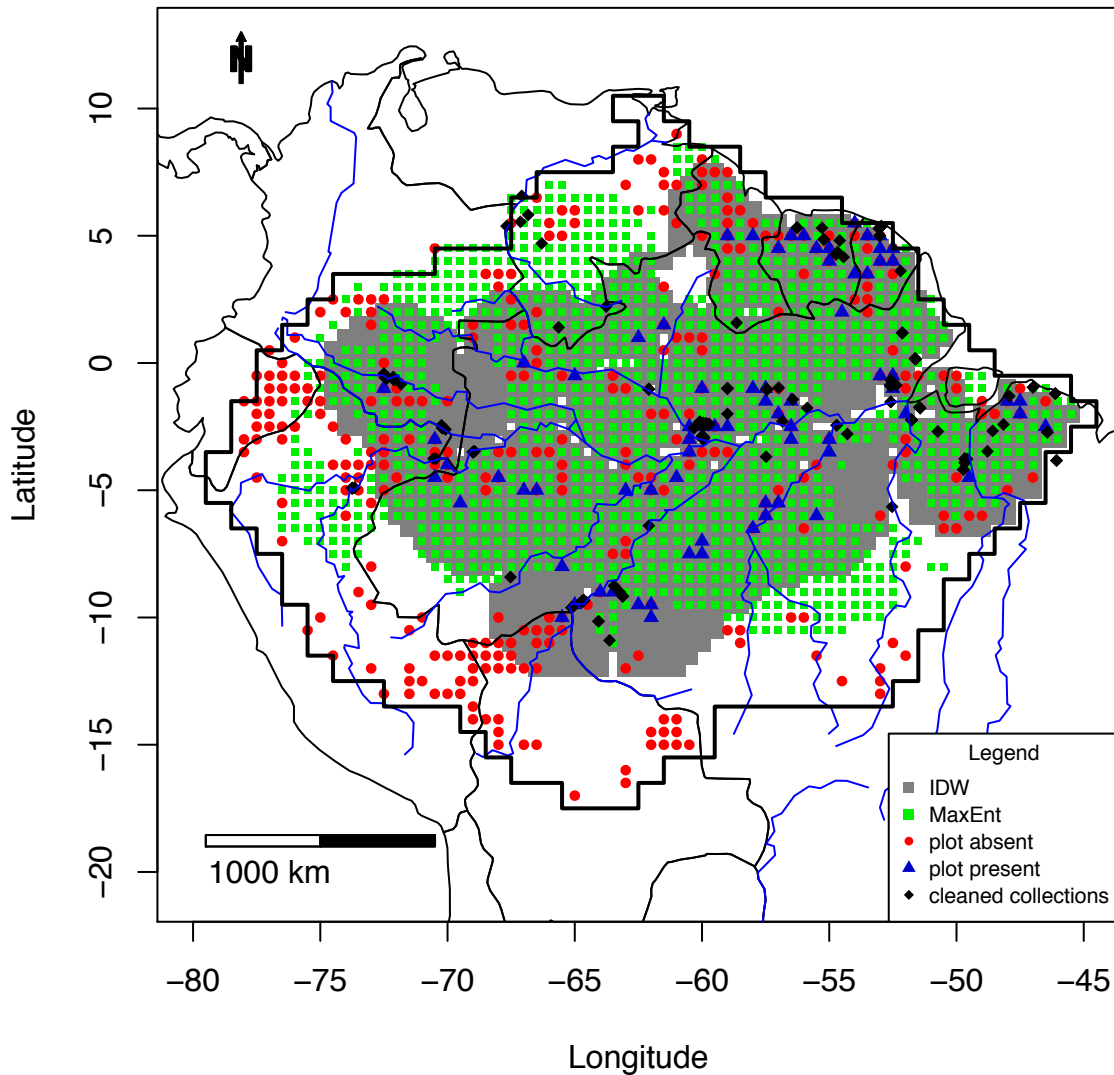

Figure S3\_170B MaxEnt map of *Zygia\_racemosa*

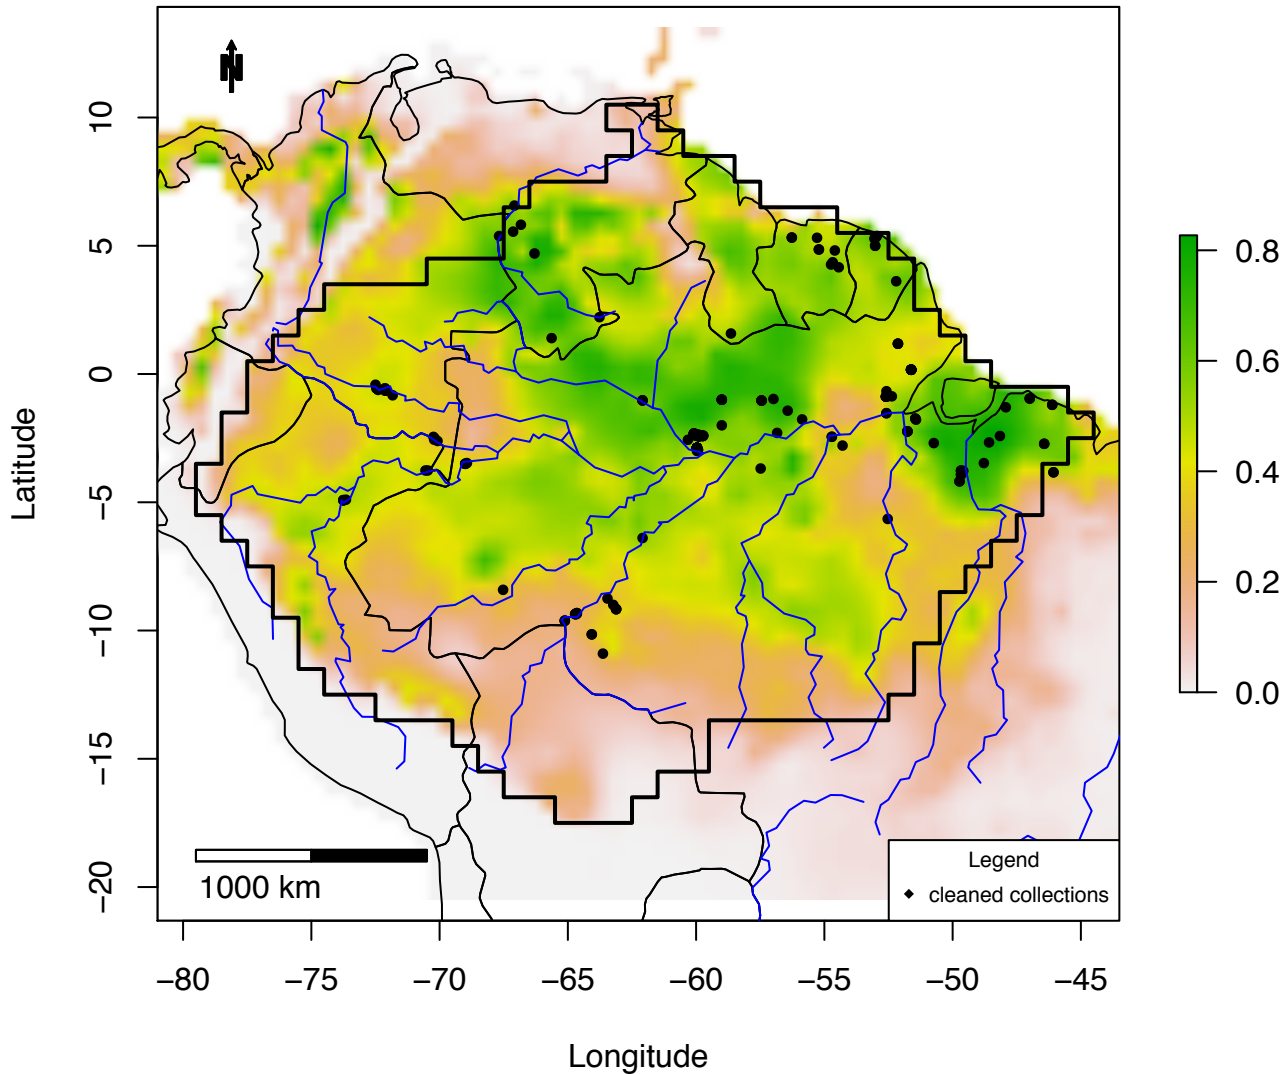

**Figure S3\_170C IDW map of *Zygia\_racemosa*:**  
**plots =0 – 0.05; IDW: 0 – 0.03**

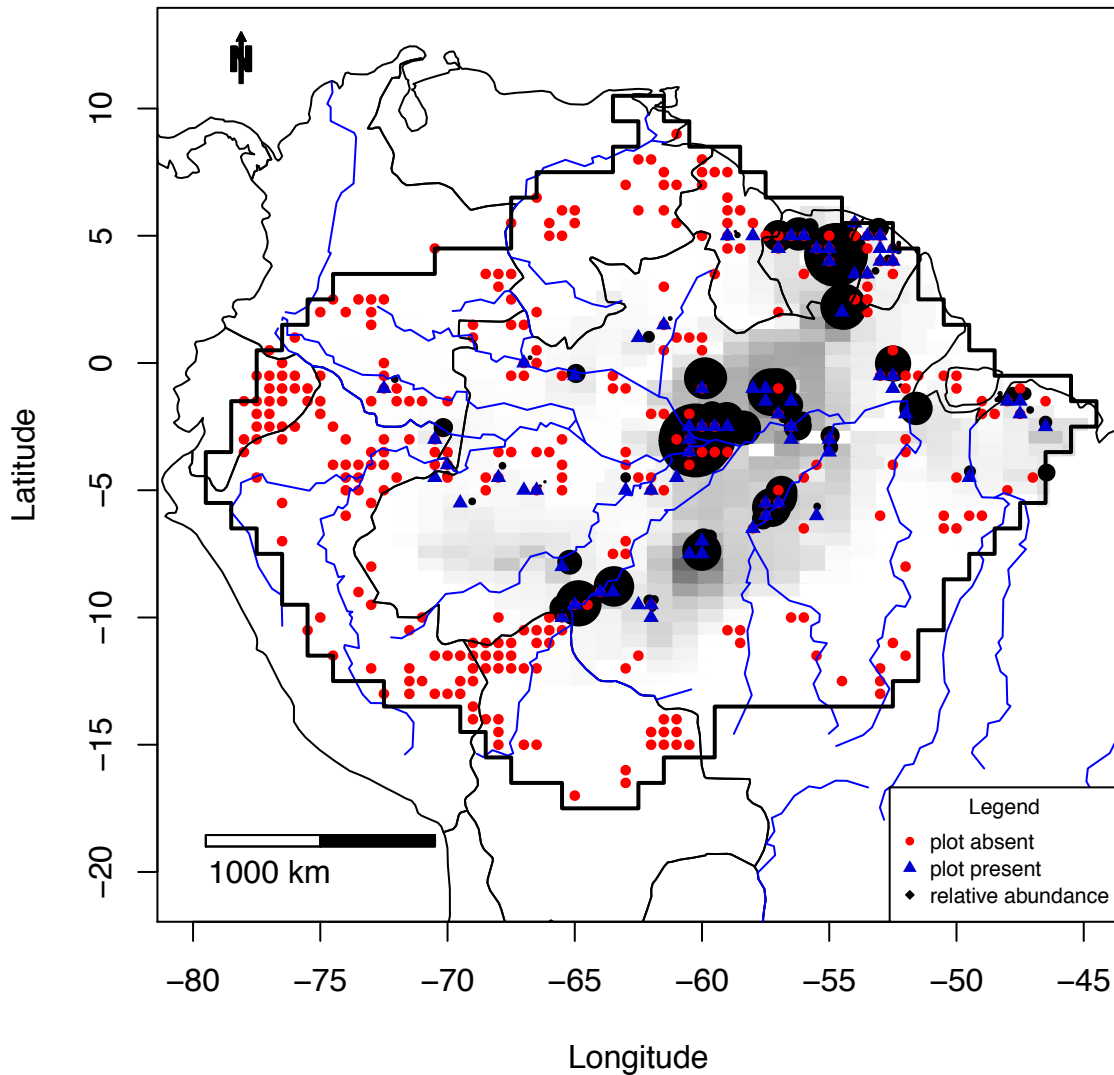

Supplement: 41598_2017_18927_MOESM3_ESM.pdf [file 41598_2017_18927_MOESM3_ESM.pdf]
