# Supplementary material for: Species Distribution Modelling: Contrasting presence-only models with plot abundance data
Source: PubMed Central journal article supplement (PMC5772443; doi:10.1038/s41598-017-18927-1), 2018-01-17

## **Supplemental Material**

**for**

### **Species Distribution Modelling: Contrasting presence-only models with plot abundance data**

Vitor F. Gomes\*, Stéphanie D. IJff, Niels Raes, Iêda Leão Amaral, Rafael P. Salomão, Luiz de Souza Coelho, Francisca Dionízia de Almeida Matos, Carolina V. Castilho, Diogenes de Andrade Lima Filho, Dairon Cárdenas López, Juan Ernesto Guevara, William E. Magnusson, Oliver L. Phillips, Florian Wittmann, Marcelo de Jesus Veiga Carim, Maria Pires Martins, Mariana Victória Irumé, Daniel Sabatier, Jean-François Molino, Olaf S. Bánki, José Renan da Silva Guimarães, Nigel C.A. Pitman, Maria Teresa Fernandez Piedade, Abel Monteagudo Mendoza, Bruno Garcia Luize, Eduardo Martins Venticinque, Evlyn Márcia Moraes de Leão Novo, Percy Núñez Vargas, Thiago Sanna Freire Silva, Angelo Gilberto Manzatto, John Terborgh, Neidiane Farias Costa Reis, Juan Carlos Montero, Katia Regina Casula, Beatriz S. Marimon, Ben-Hur Marimon Jr., Euridice N. Honorio Coronado, Ted R. Feldpausch, Alvaro Duque, Charles Eugene Zartman, Nicolás Castaño Arboleda, Timothy J. Killeen, Bonifacio Mostacedo, Rodolfo Vasquez, Jochen Schöngart, Rafael L. Assis, Marcelo Brilhante Medeiros, Marcelo Fragomeni Simon, Ana Andrade, William F. Laurance, José Luís Camargo, Layon O. Demarchi, Susan G.W. Laurance, Emanuelle de Sousa Farias, Henrique Eduardo Mendonça Nascimento, Juan David Cardenas Revilla, Adriano Quaresma, Flávia R.C. Costa, Ima Célia Guimarães Vieira, Bruno Barçante Ladvocat Cintra, Hernán Castellanos, Roel Brienén, Pablo R. Stevenson, Yuri Feitosa, Joost F. Duivenvoorden, Gerardo A. Aymard C., Hugo F. Mogollón, Natalia Targhetta, James A. Comiskey, Alberto Vicentini, Aline Lopes, Gabriel Damasco, Nállarett Dávila, Roosevelt García-Villacorta, Carolina Levis, Juliana Schietti, Priscila Souza, Thaise Emilio, Alfonso Alonso, David Neill, Francisco Dallmeier, Leandro Valle Ferreira, Alejandro Araujo-Murakami, Daniel Praia, Dário Dantas do Amaral, Fernanda Antunes Carvalho, Fernanda Coelho de Souza, Kenneth Feeley, Luzmila Arroyo, Marcelo Petratti Pansonato, Rogerio Gribel, Boris Villa, Juan Carlos Licona,

Paul V.A. Fine, Carlos Cerón, Chris Baraloto, Eliana M. Jimenez, Juliana Stropp, Julien Engel, Julien Engel, Marcos Silveira, Maria Cristina Peñuela Mora, Pascal Petronelli, Paul Maas, Raquel Thomas-Caesar, Terry W. Henkel, Doug Daly, Marcos Ríos Paredes, Tim R. Baker, Alfredo Fuentes, Carlos A. Peres, Jerome Chave, Jose Luis Marcelo Pena, Kyle G. Dexter, Miles R. Silman, Peter Møller Jørgensen, Toby Pennington, Anthony Di Fiore, Fernando Cornejo Valverde, Juan Fernando Phillips, Gonzalo Rivas-Torres, Patricio von Hildebrand, Tinde R. van Andel, Ademir R. Ruschel, Adriana Prieto, Agustín Rudas, Bruce Hoffman, César I.A. Vela, Edelcilio Marques Barbosa, Egleé L. Zent, George Pepe Gallardo Gonzales, Hilda Paulette Dávila Doza, Ires Paula de Andrade Miranda, Jean-Louis Guillaumet, Linder Felipe Mozombite Pinto, Luiz Carlos de Matos Bonates, Natalino Silva, Ricardo Zárate Gómez, Stanford Zent, Therany Gonzales, Vincent A. Vos, Yadvinder Malhi, Alexandre A. Oliveira, Angela Cano, Bianca Weiss Albuquerque, Corine Vriesendorp, Diego Felipe Correa, Emilio Vilanova Torre, Geertje van der Heijden, Hirma Ramirez-Angulo, José Ferreira Ramos, Kenneth R. Young, Maira Rocha, Marcelo Trindade Nascimento, Maria Natalia Umaña Medina, Milton Tirado, Ophelia Wang, Rodrigo Sierra, Armando Torres-Lezama, Casimiro Mendoza, Cid Ferreira, Cláudia Baidier, Daniel Villarroel, Henrik Balslev, Italo Mesones, Ligia Estela Urrego Giraldo, Luisa Fernanda Casas, Manuel Augusto Ahuite Reategui, Reynaldo Linares-Palomino, Roderick Zagt, Sasha Cárdenas, William Farfan-Rios, Adeilza Felipe Sampaio, Daniela Pauletto, Elvis H. Valderrama Sandoval, Freddy Ramirez Arevalo, Isau Huamantupa-Chuquimaco, Karina Garcia-Cabrera, Lionel Hernandez, Luis Valenzuela Gamarra, Miguel N. Alexiades, Susamar Pansini, Walter Palacios Cuenca, William Milliken, Joana Ricardo, Gabriela Lopez-Gonzalez, Edwin Pos, Hans ter Steege\*

\*Correspondence and requests for materials should be addressed to H.T.S. (email: [hans.tersteege@naturalis.nl](mailto:hans.tersteege@naturalis.nl))

## **Appendix S5: Area of occupancy predicted by MaxEnt for each step of the modelling pipeline.**

MaxEnt's environmental suitability maps for all 227 hyperdominant species for each step of the cleaning pipeline. *Red dots*: excluded records from original GBIF data using 'GeoClean' function and kernel density estimate. *Dashed blue line*: convex hull including all accepted collection localities plus a 300 km buffer. *Light blue*: Predicted area of occupancy using GBIF untreated data (GBIF records). *Light green*: Predicted area of occupancy using GBIF data with GeoClean treatment (cleaned GBIF records). *Medium green*: Predicted area of occupancy using GBIF data with 'GeoClean' function and kernel density estimate treatments (kernel density). *Dark green*: Final, accepted, area of occupancy using 'GeoClean' function, kernel density estimate, convex hull and buffer treatments (kernel density estimate GBIF records). Maps created with custom R script. Base map source (country.shp, rivers.shp): ESRI (<http://www.esri.com/data/basemaps>, © Esri, DeLorme Publishing Company).

# Abarema jupunba

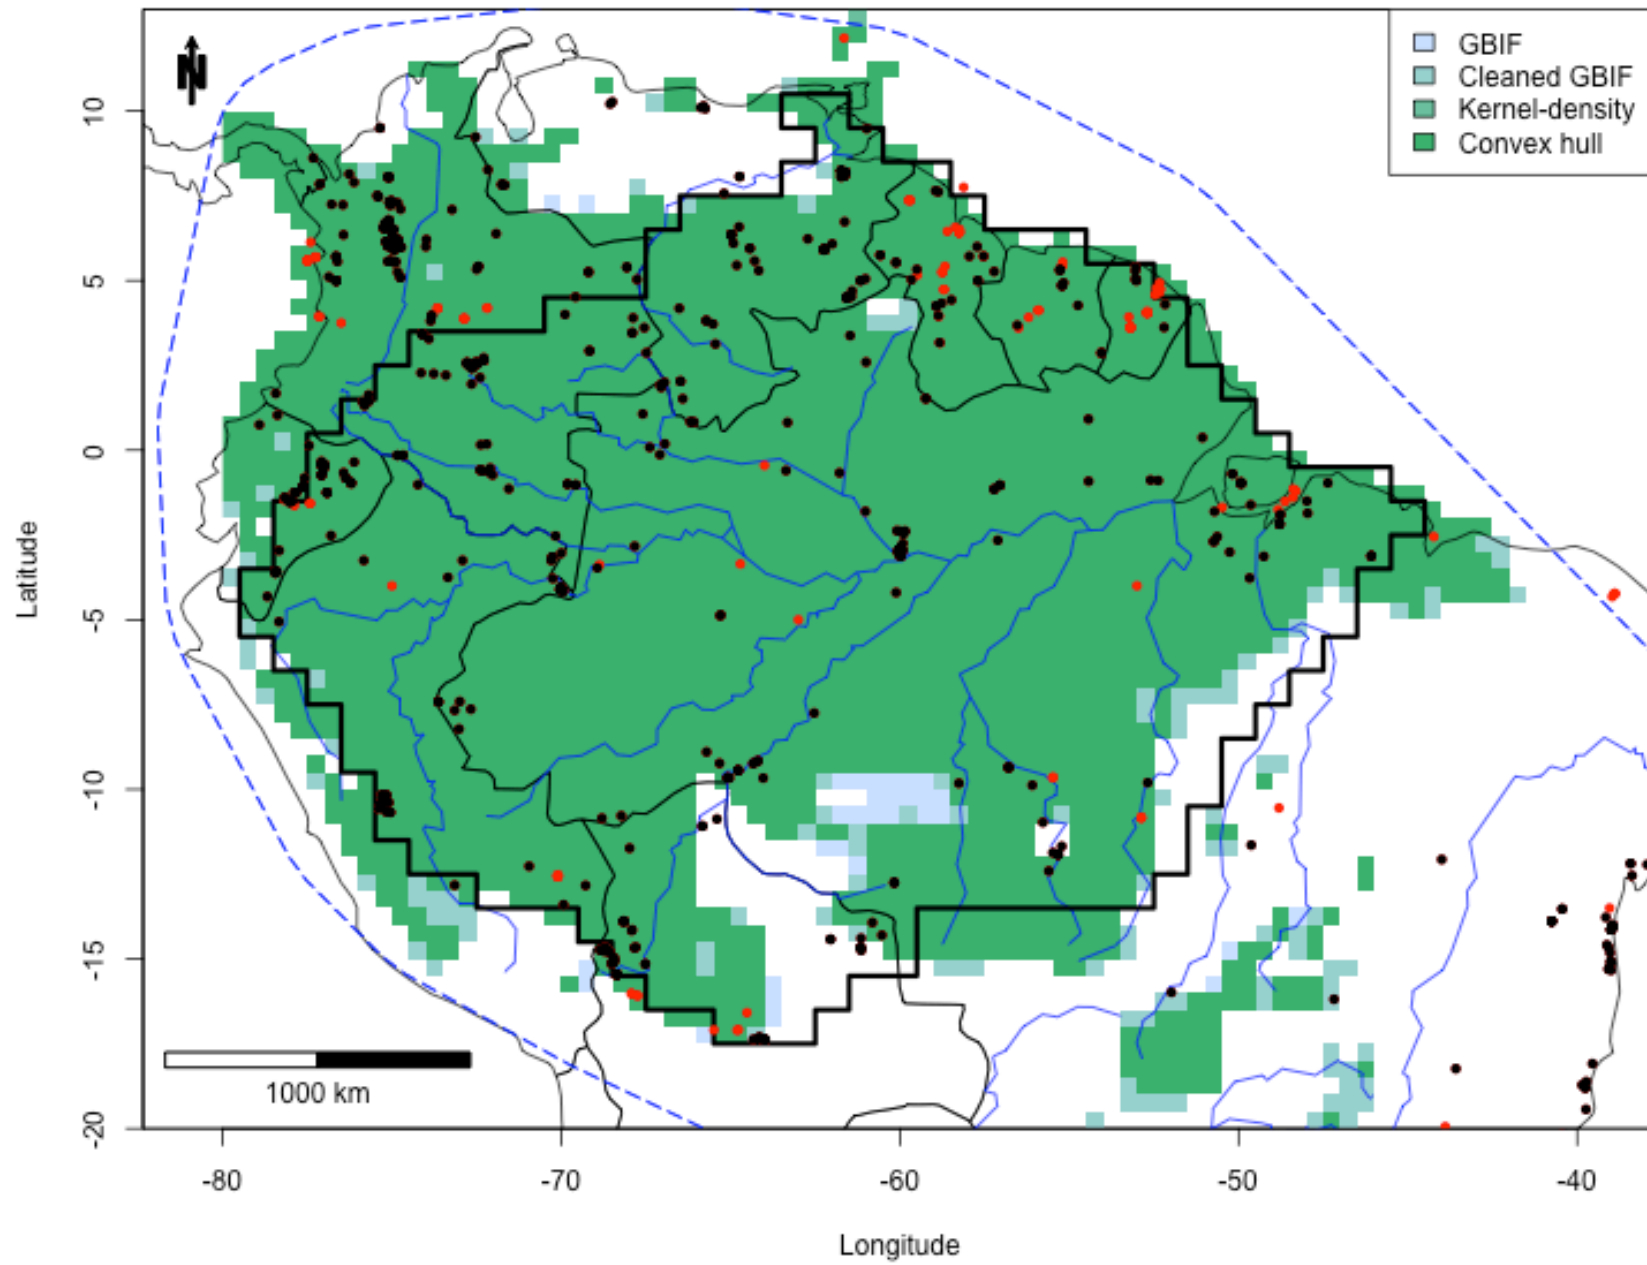



# *Acosmium cardenasii*

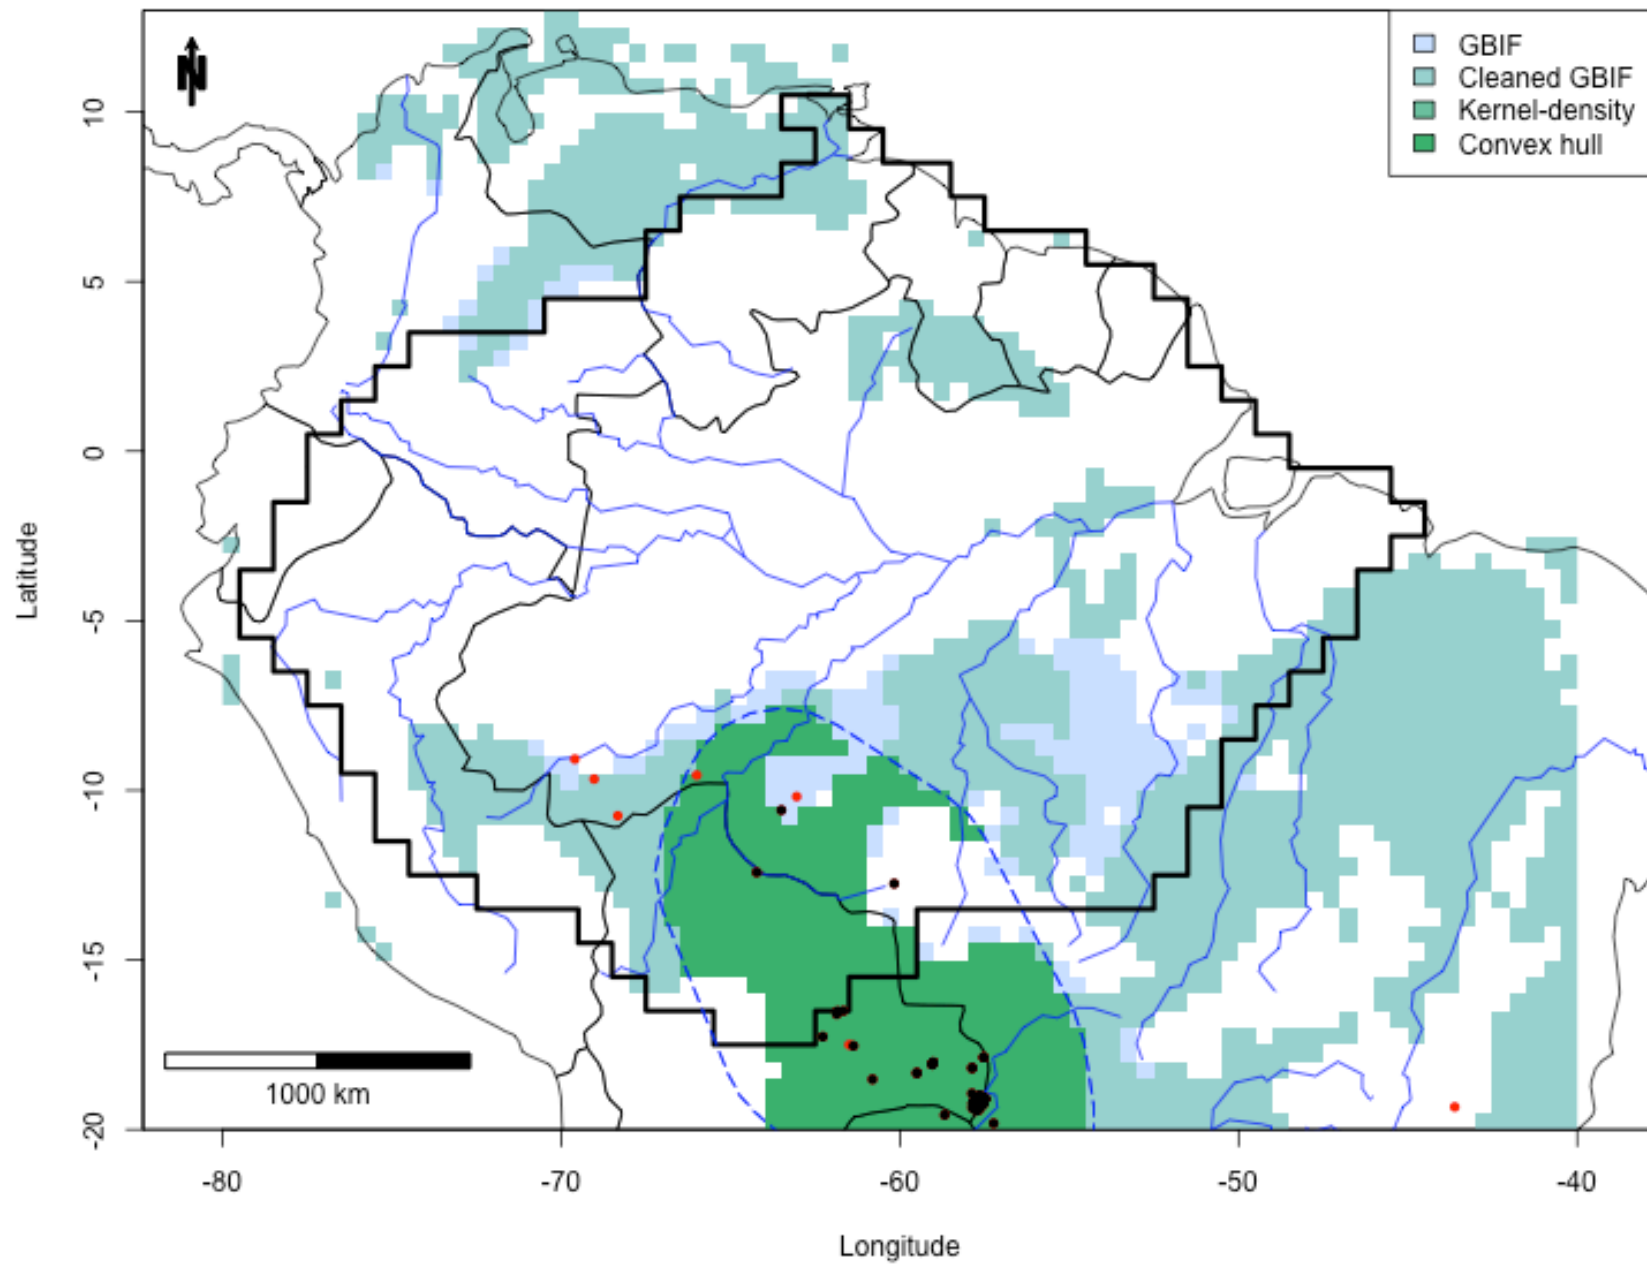

# Alexa imperatricis

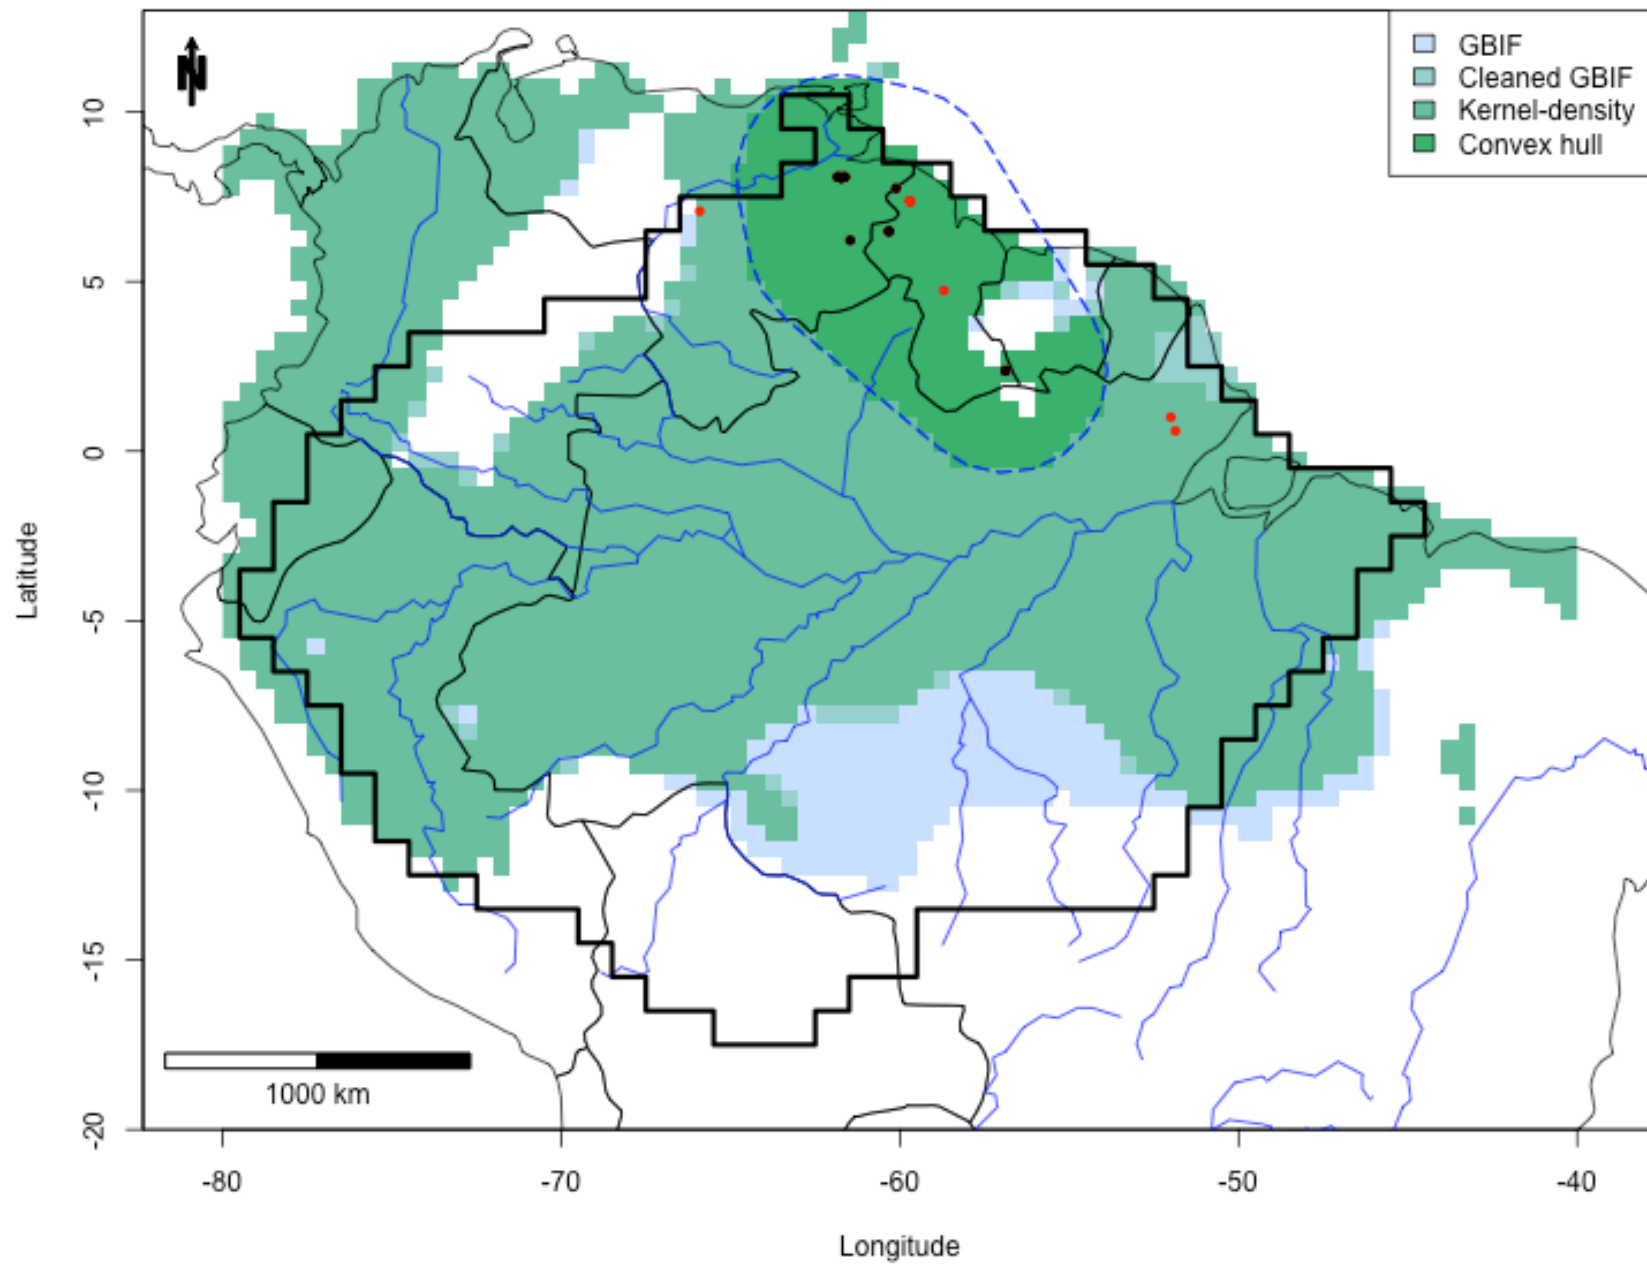

*Amaioua guianensis*

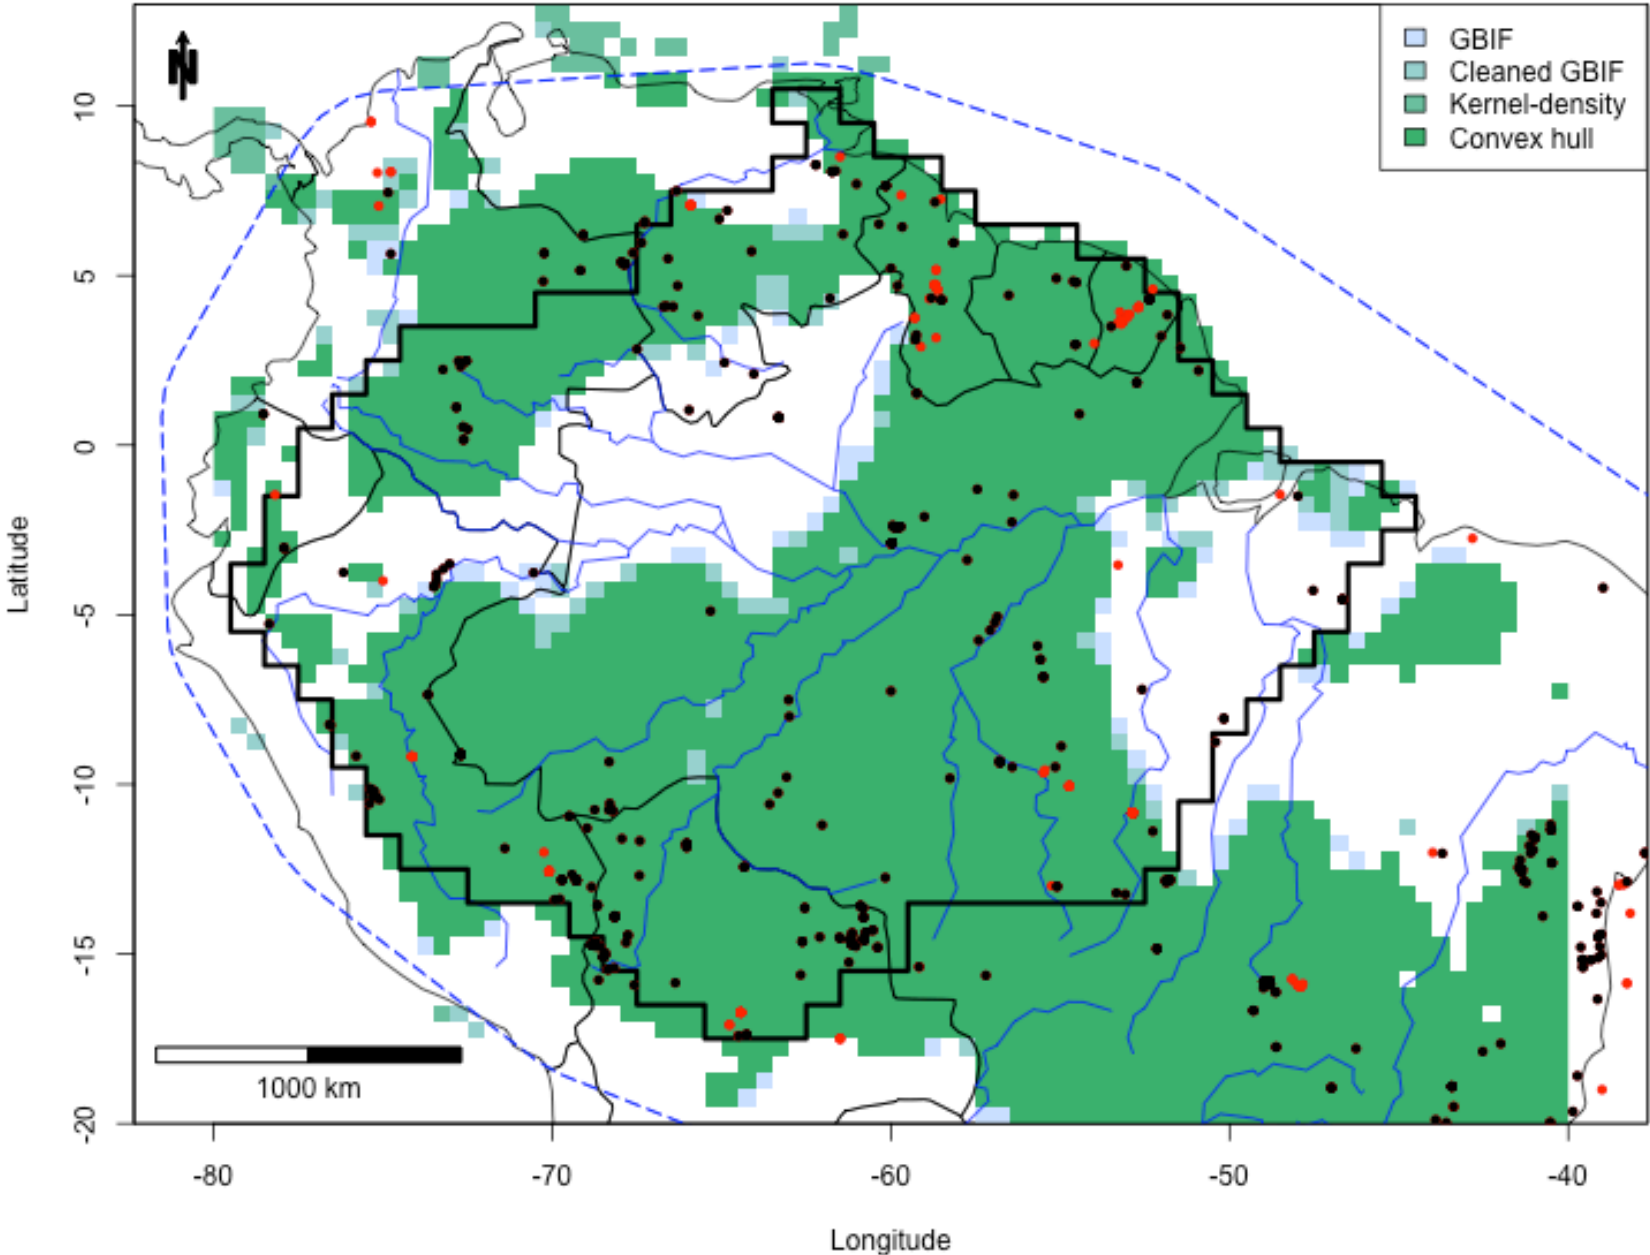

# Amphiodon effusus

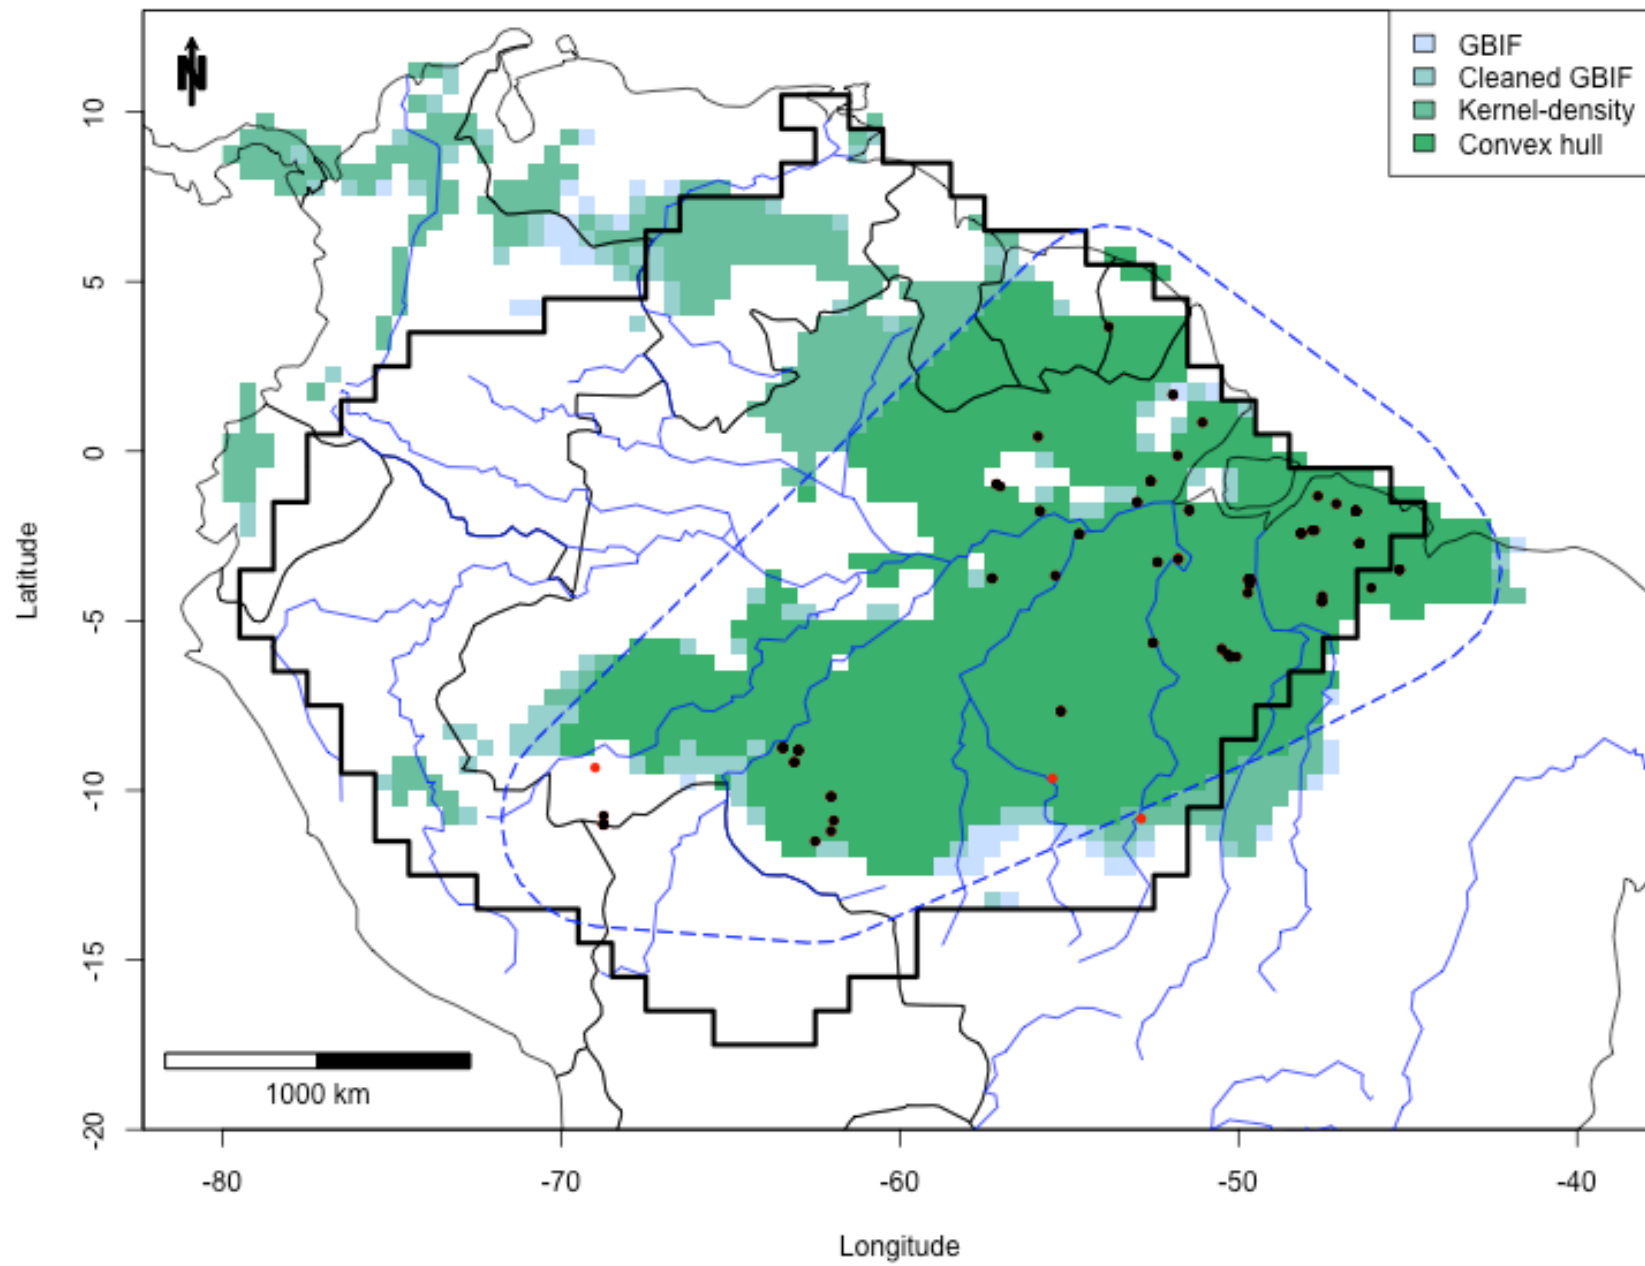

# Aparisthium cordatum

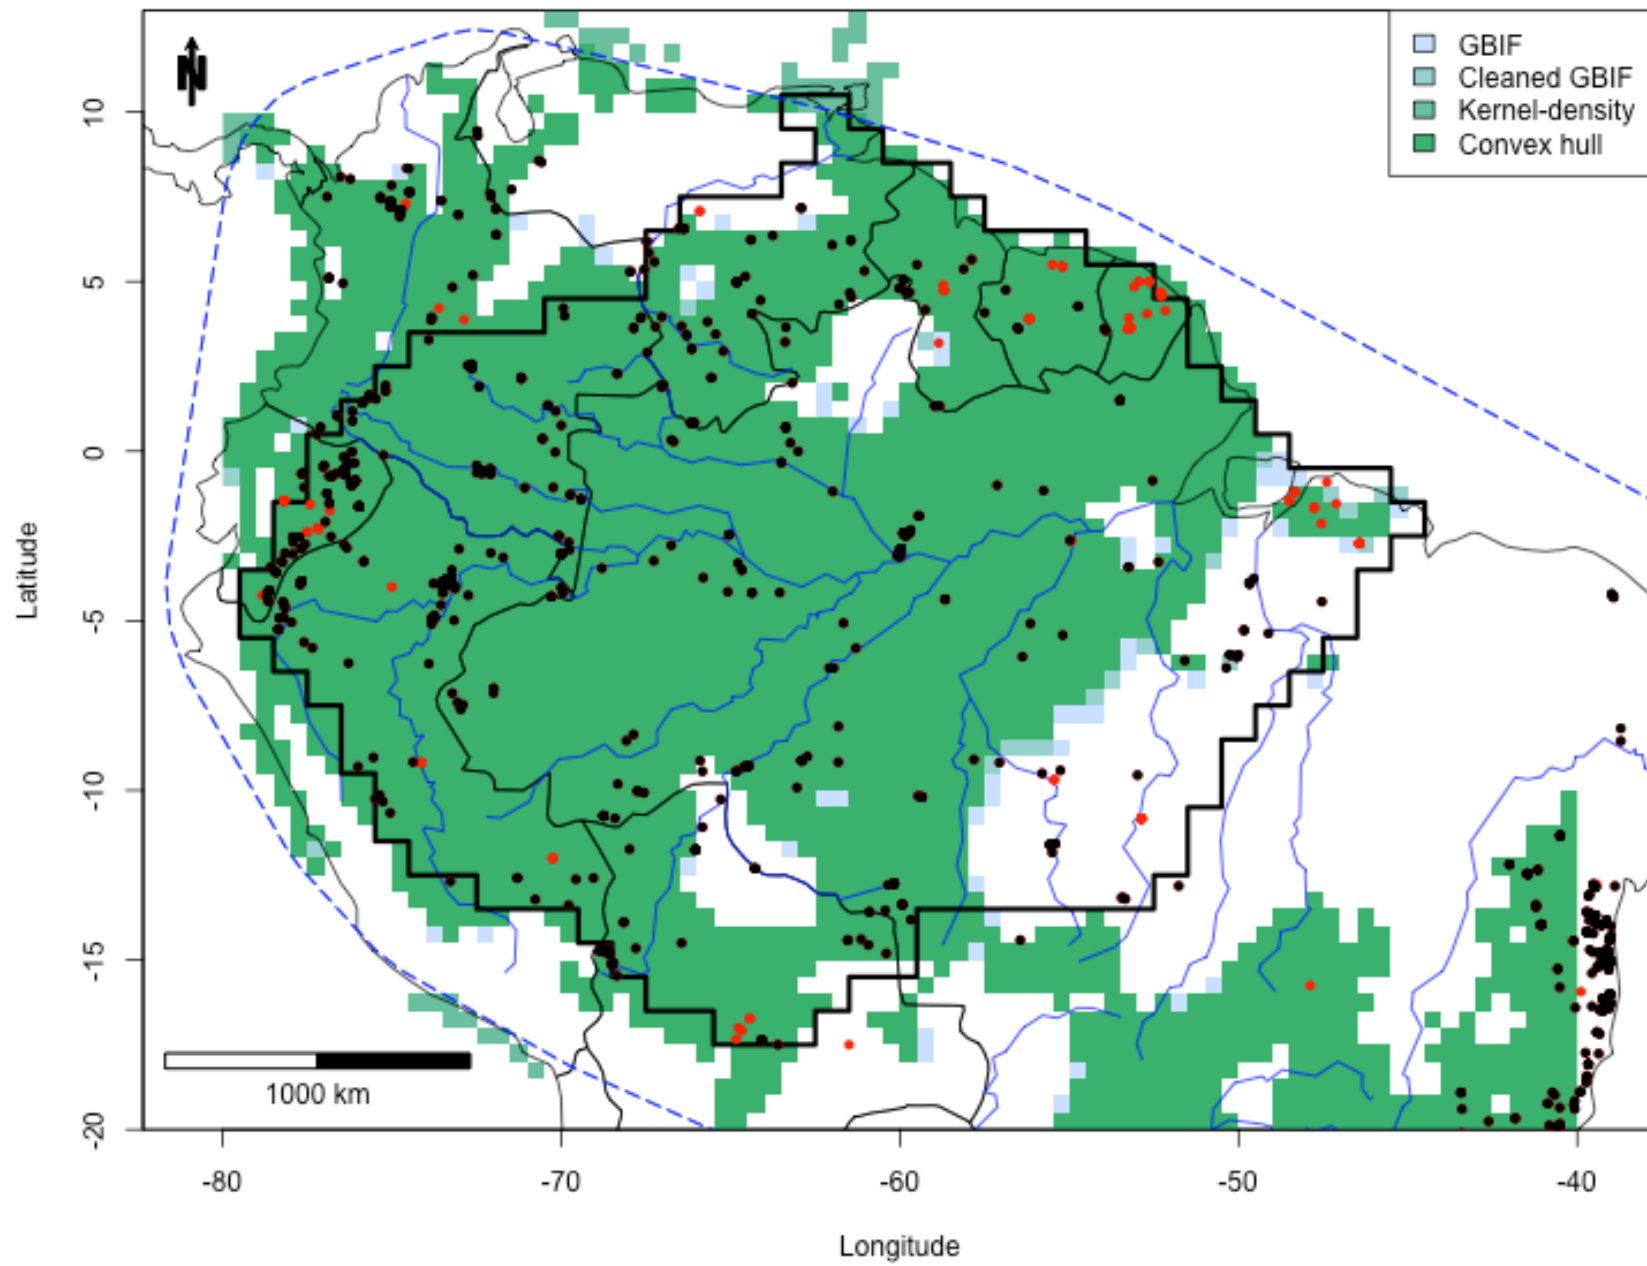

# *Apeiba glabra*

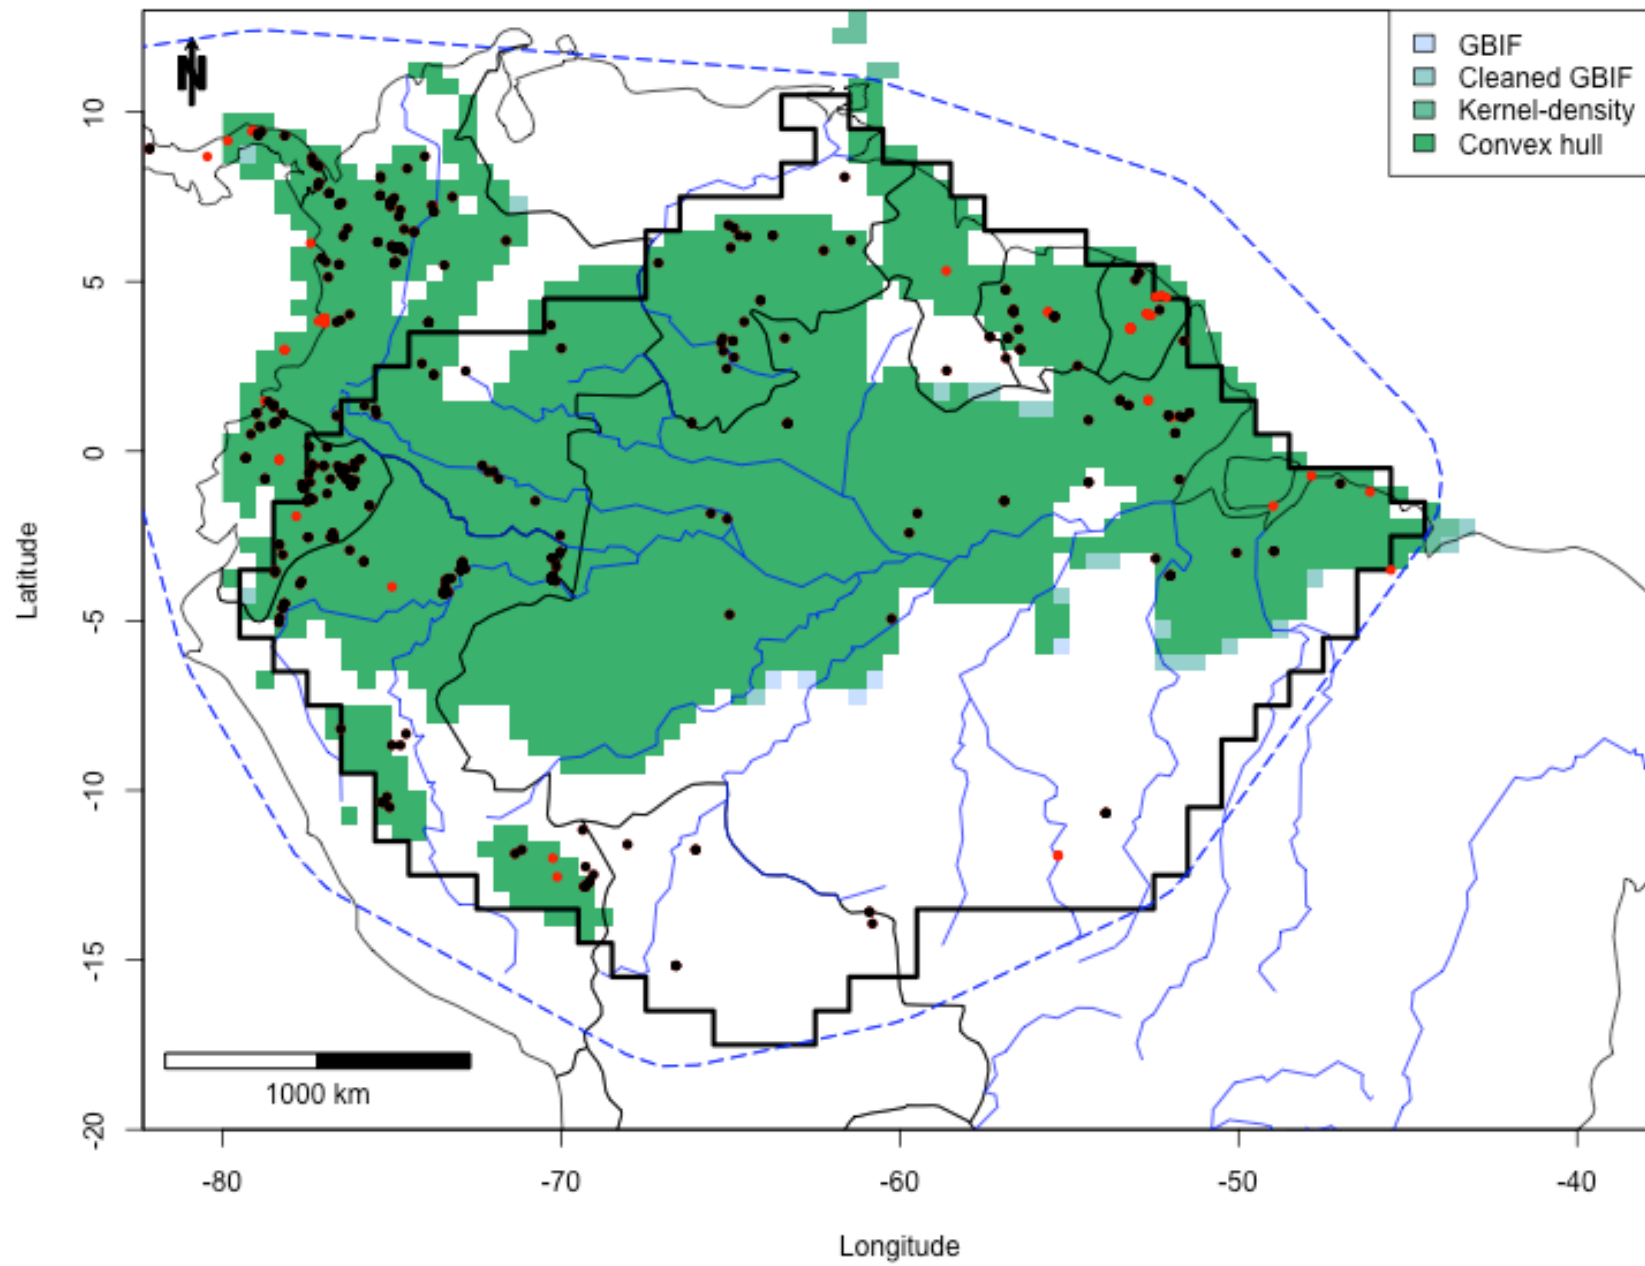

# Apeiba tibourbou

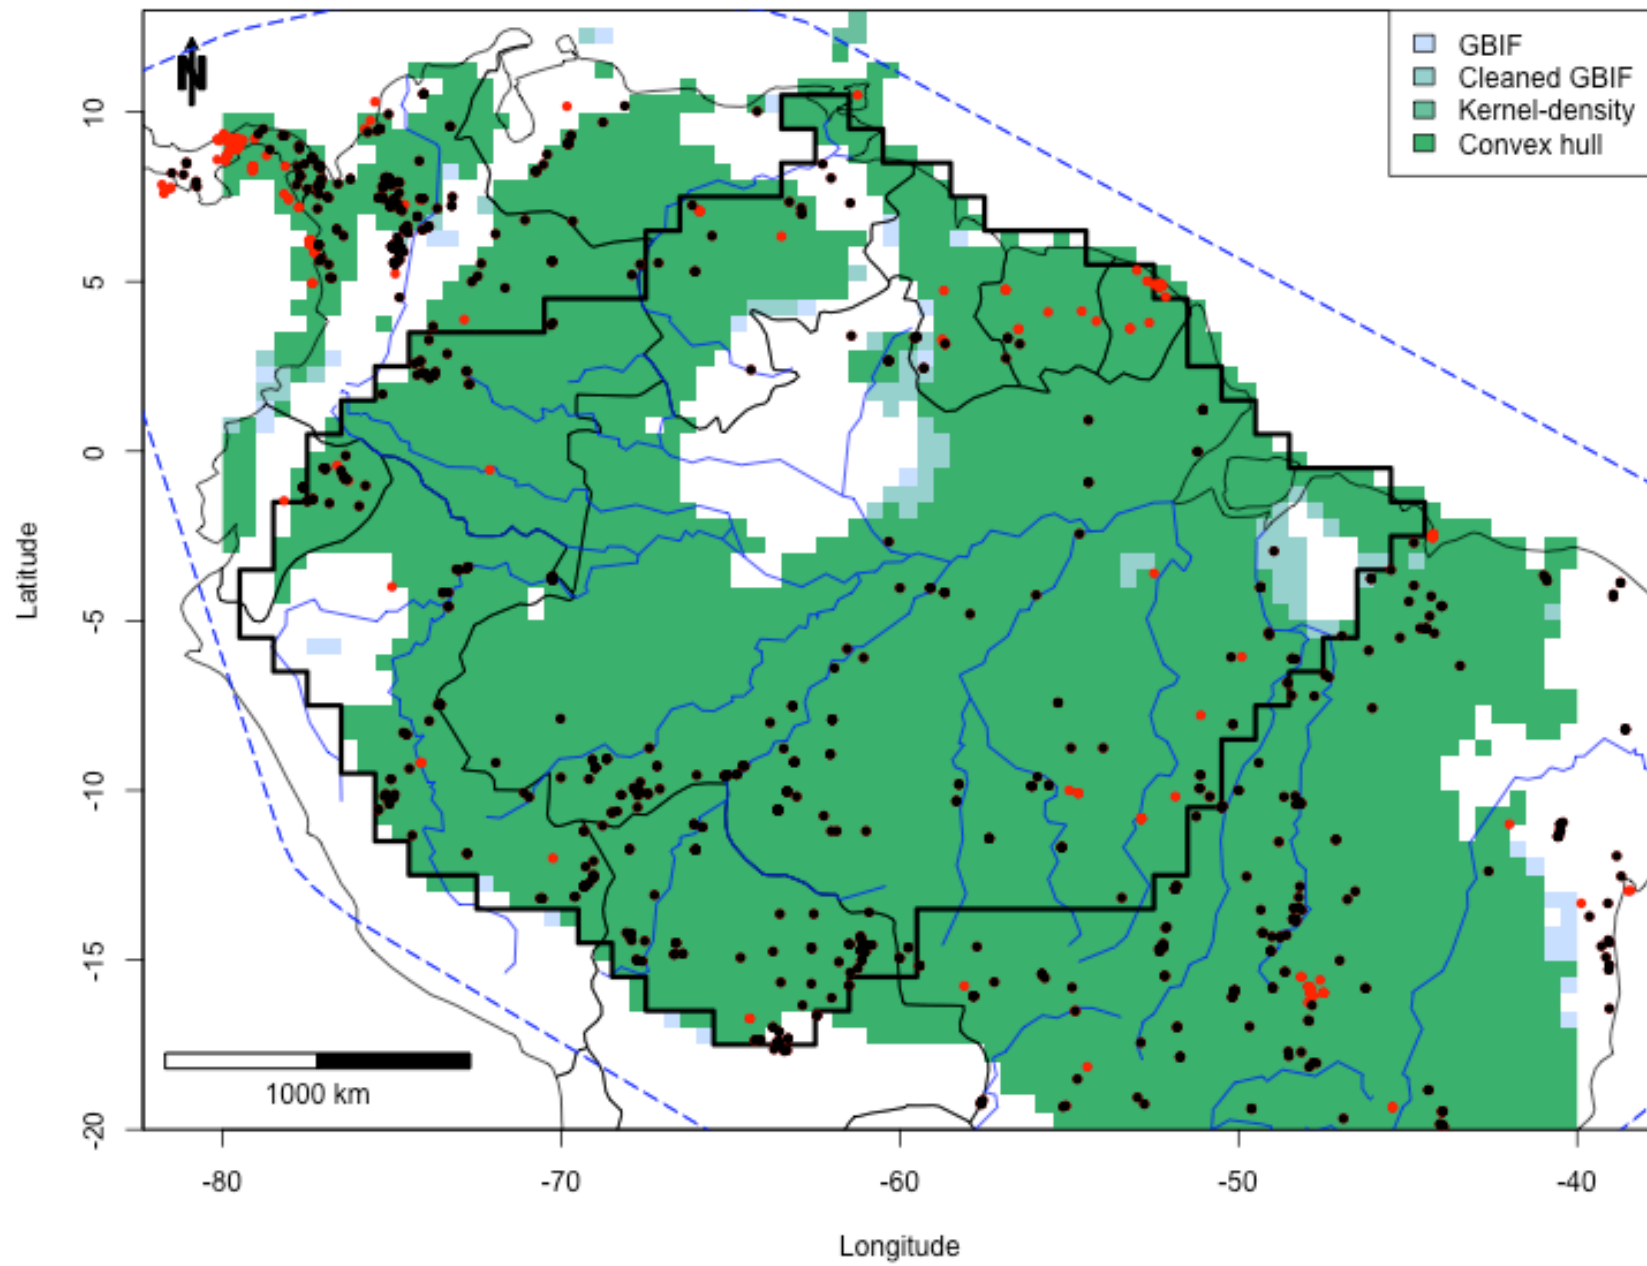



# *Aspidosperma excelsum*

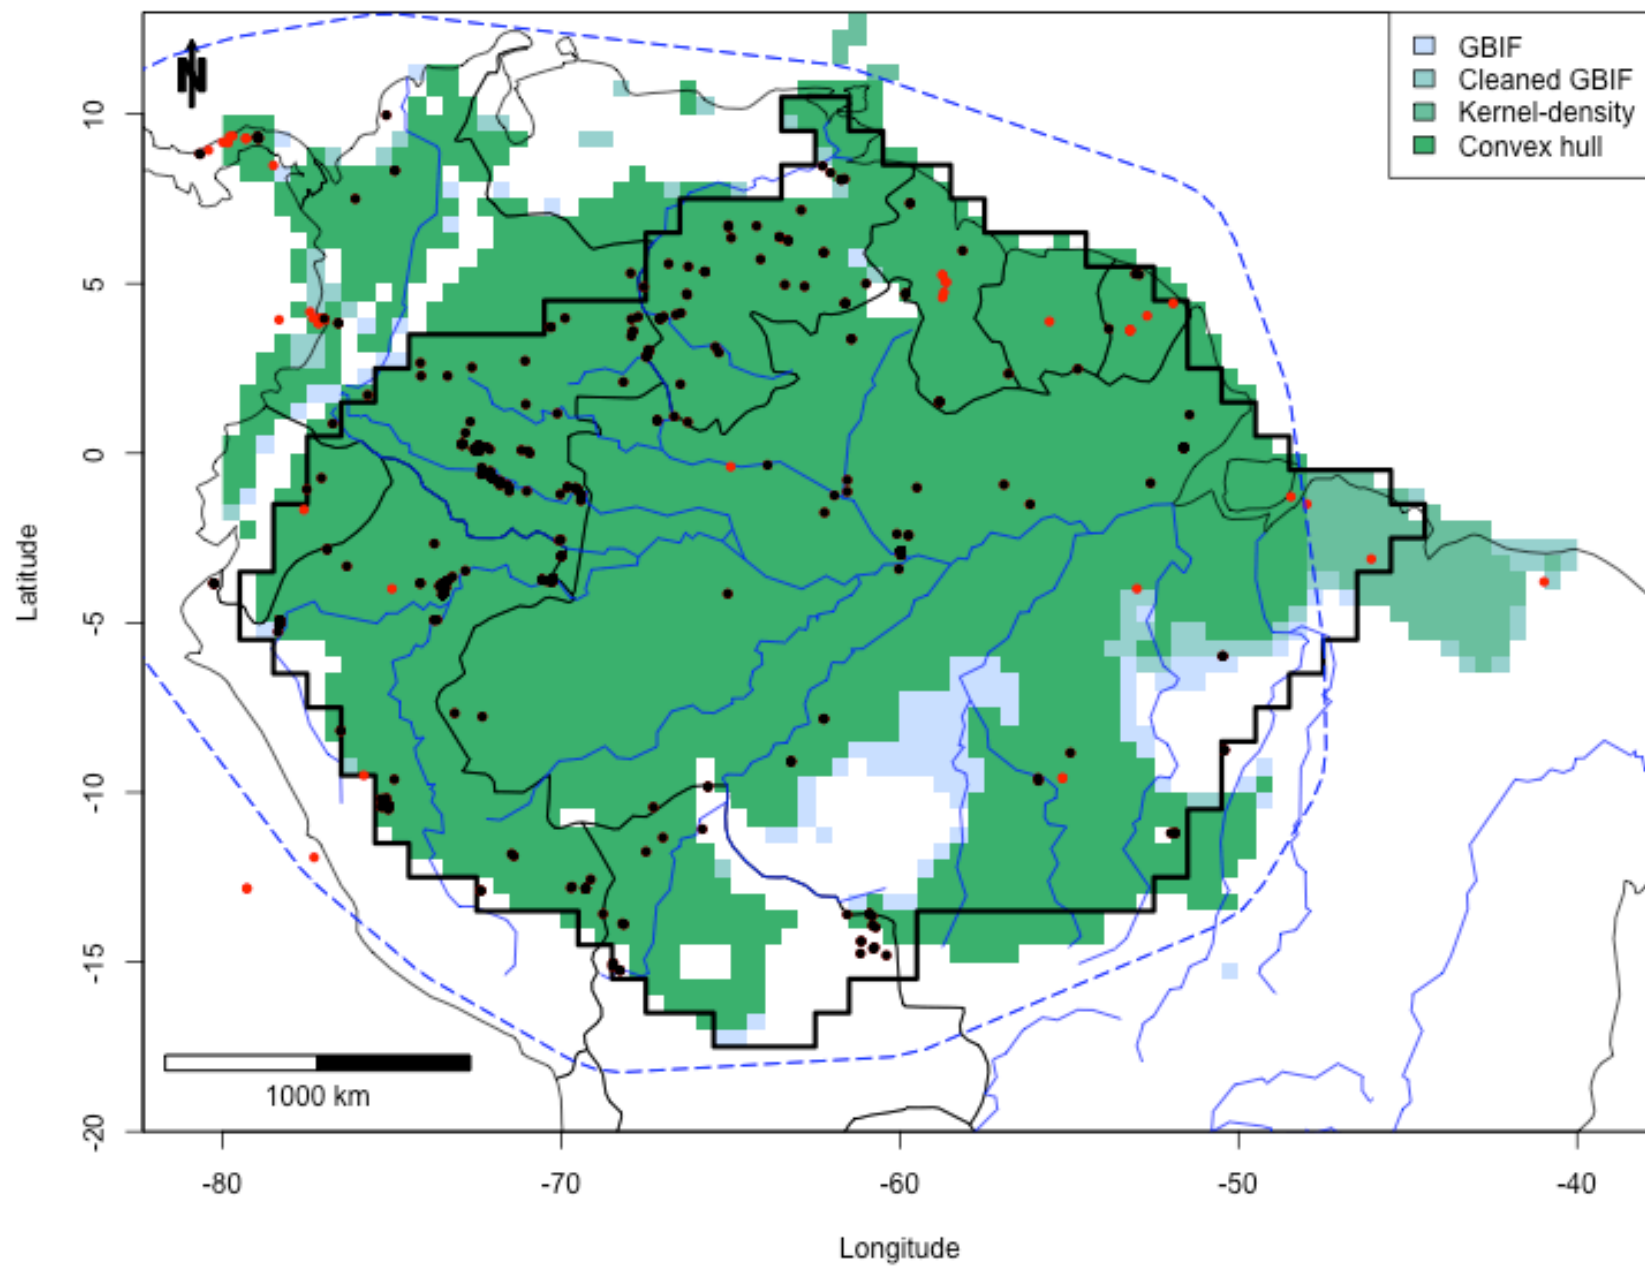



# Astrocaryum aculeatum

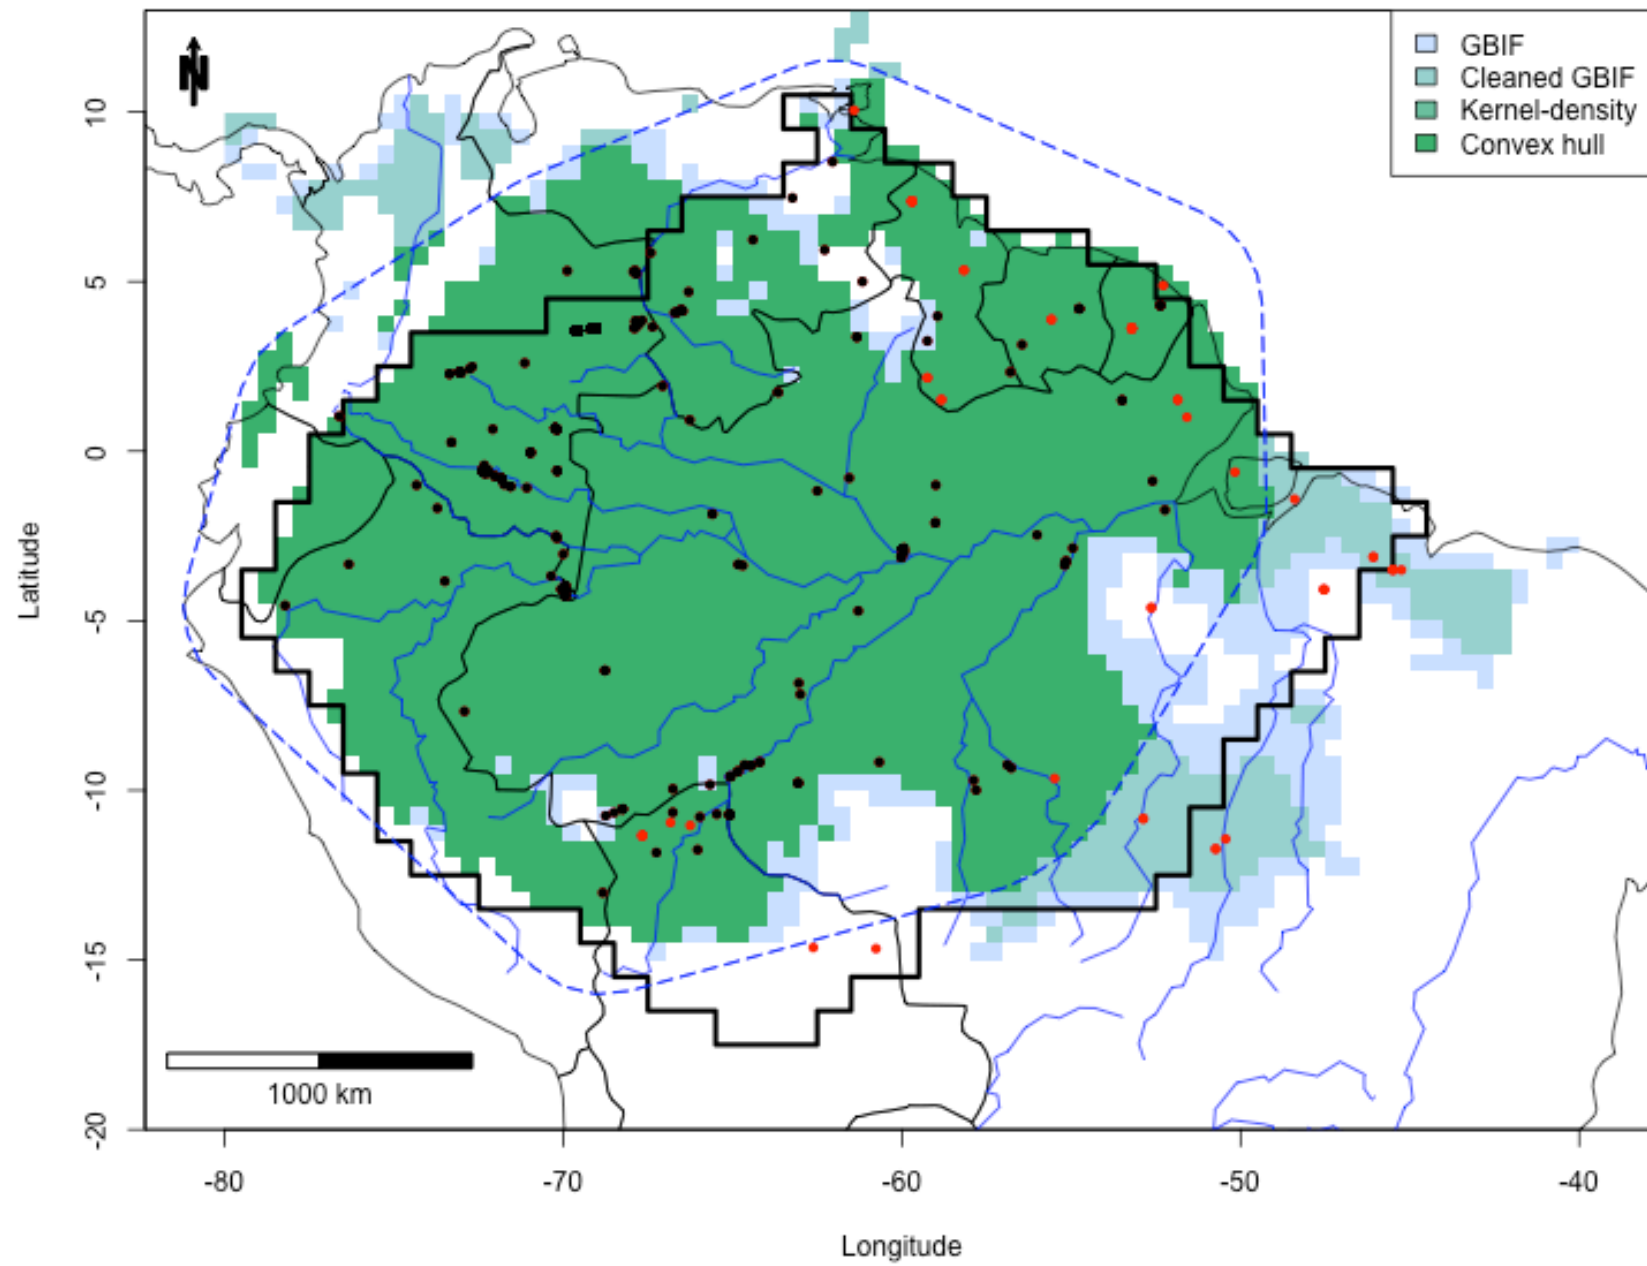

# *Astrocaryum murumuru*

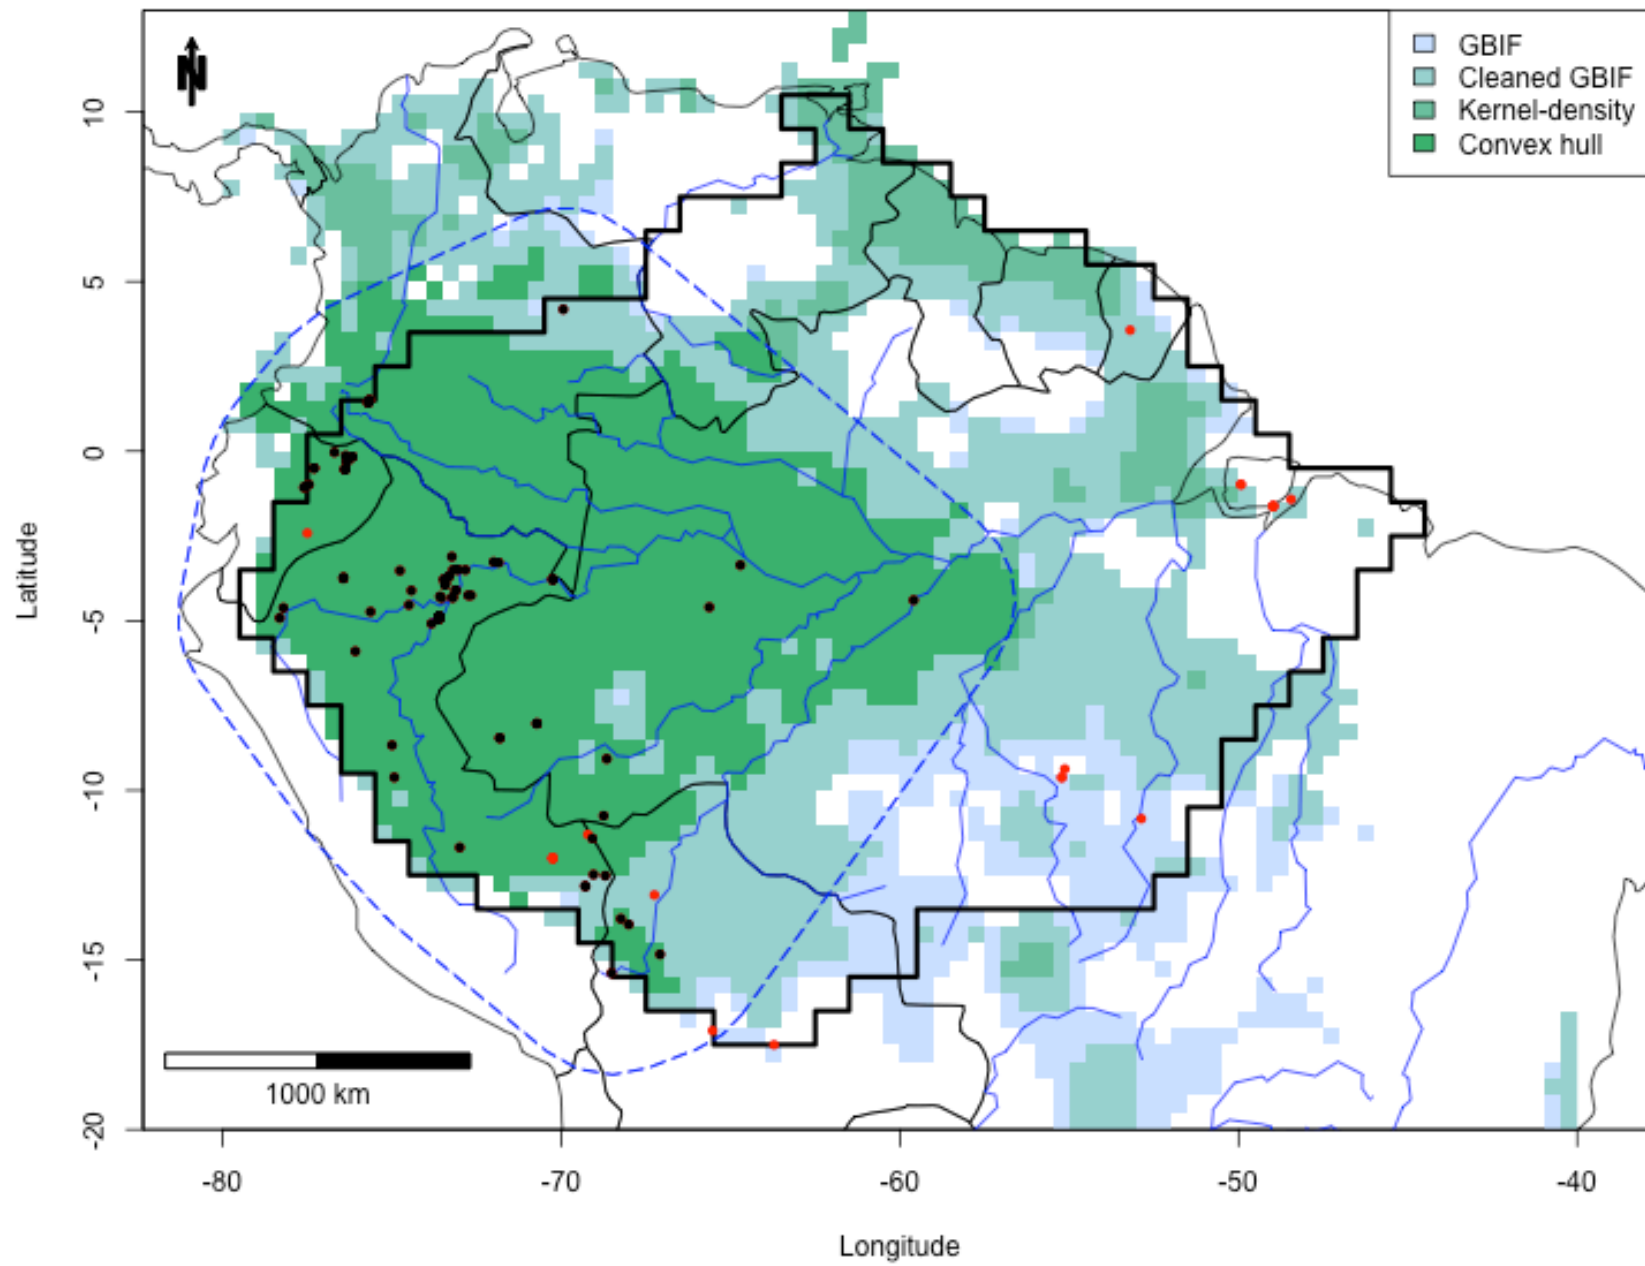

# *Astrocaryum sciophilum*

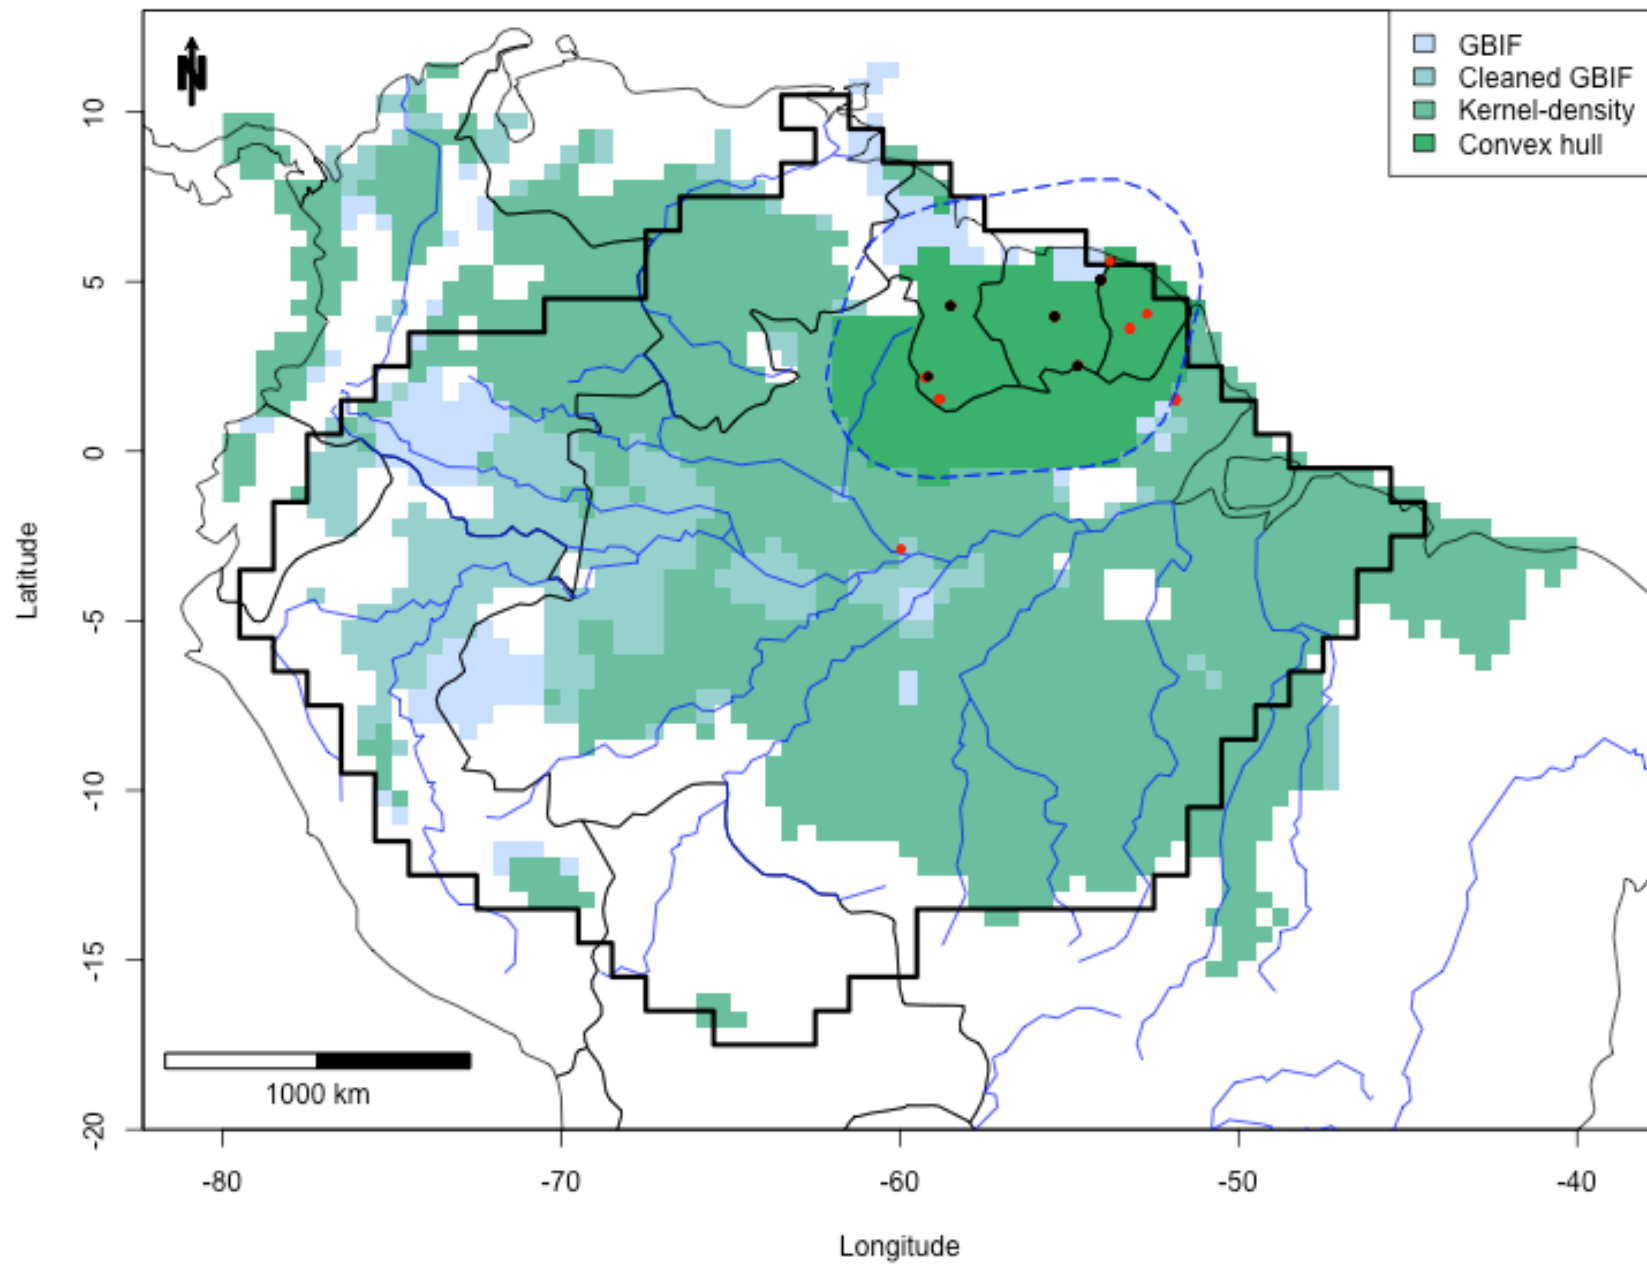

# *Attalea butyracea*

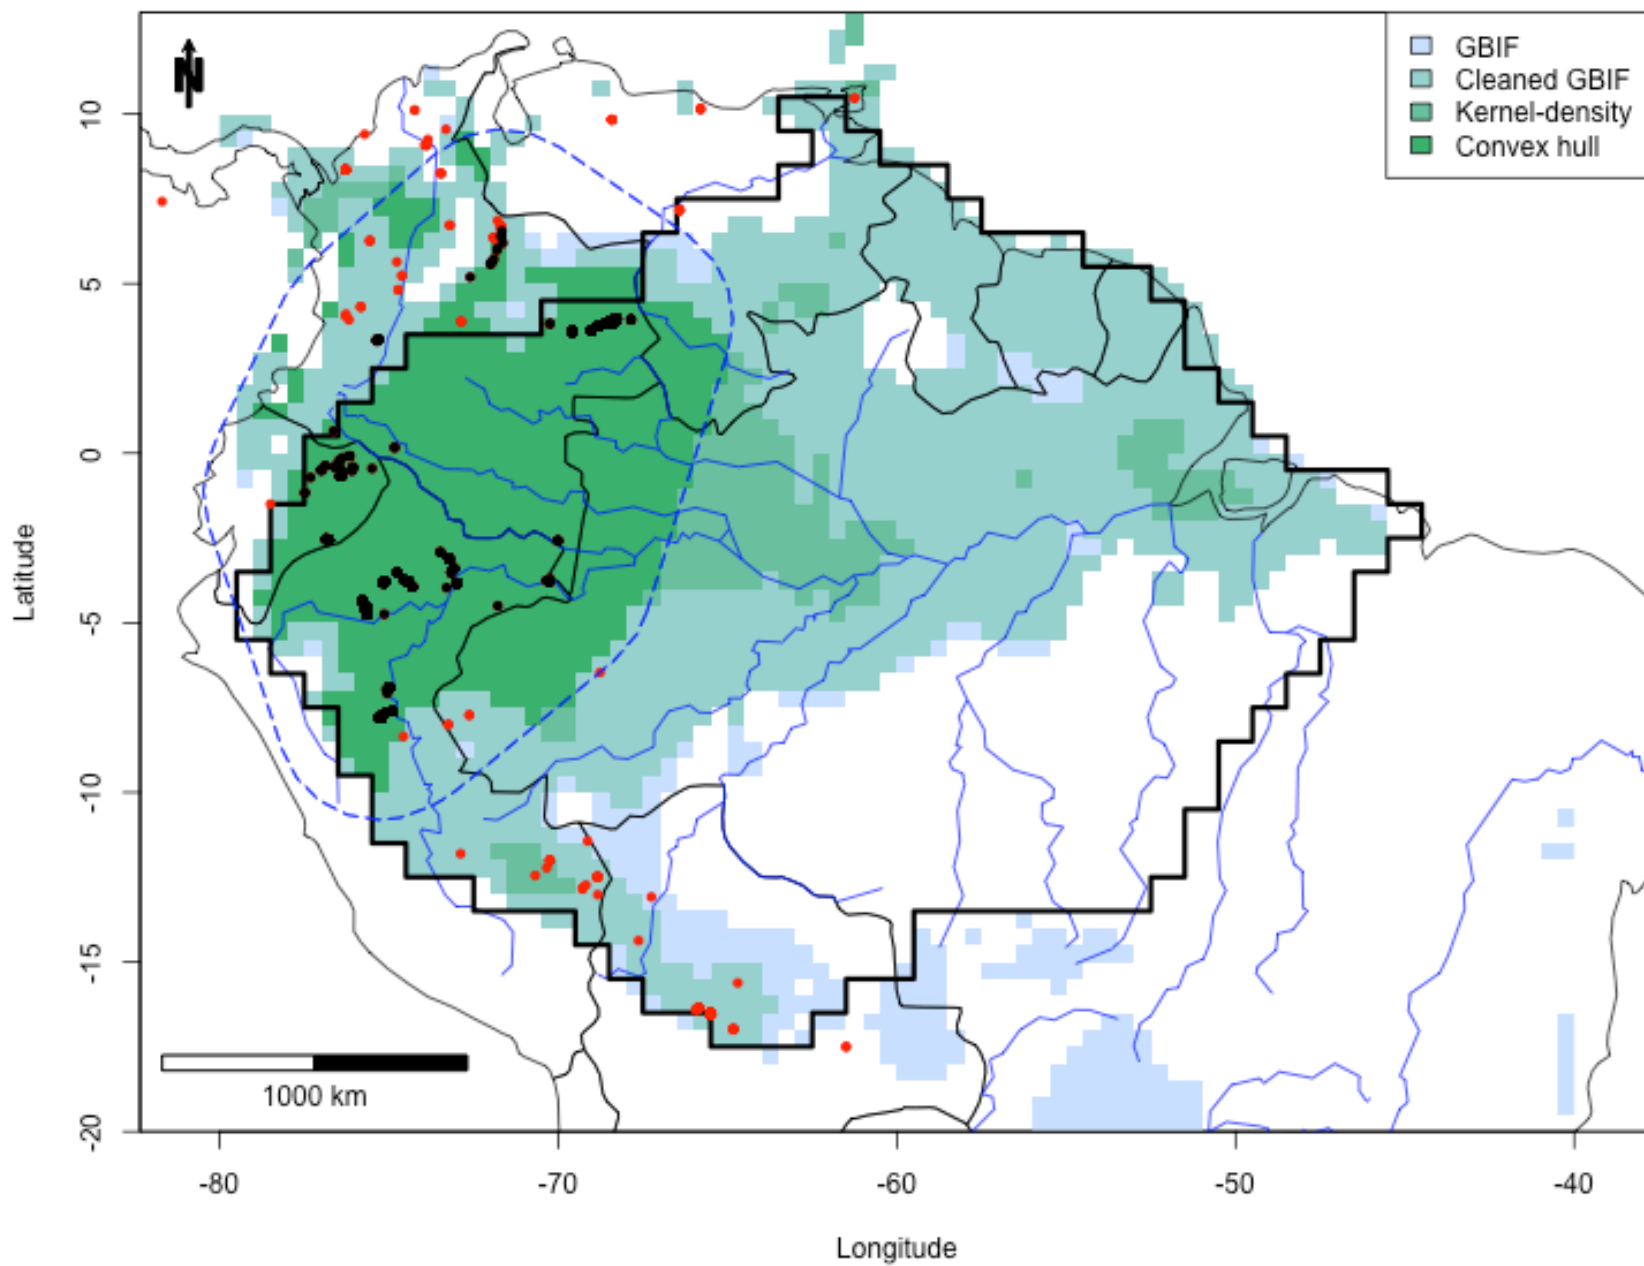

# Attalea maripa

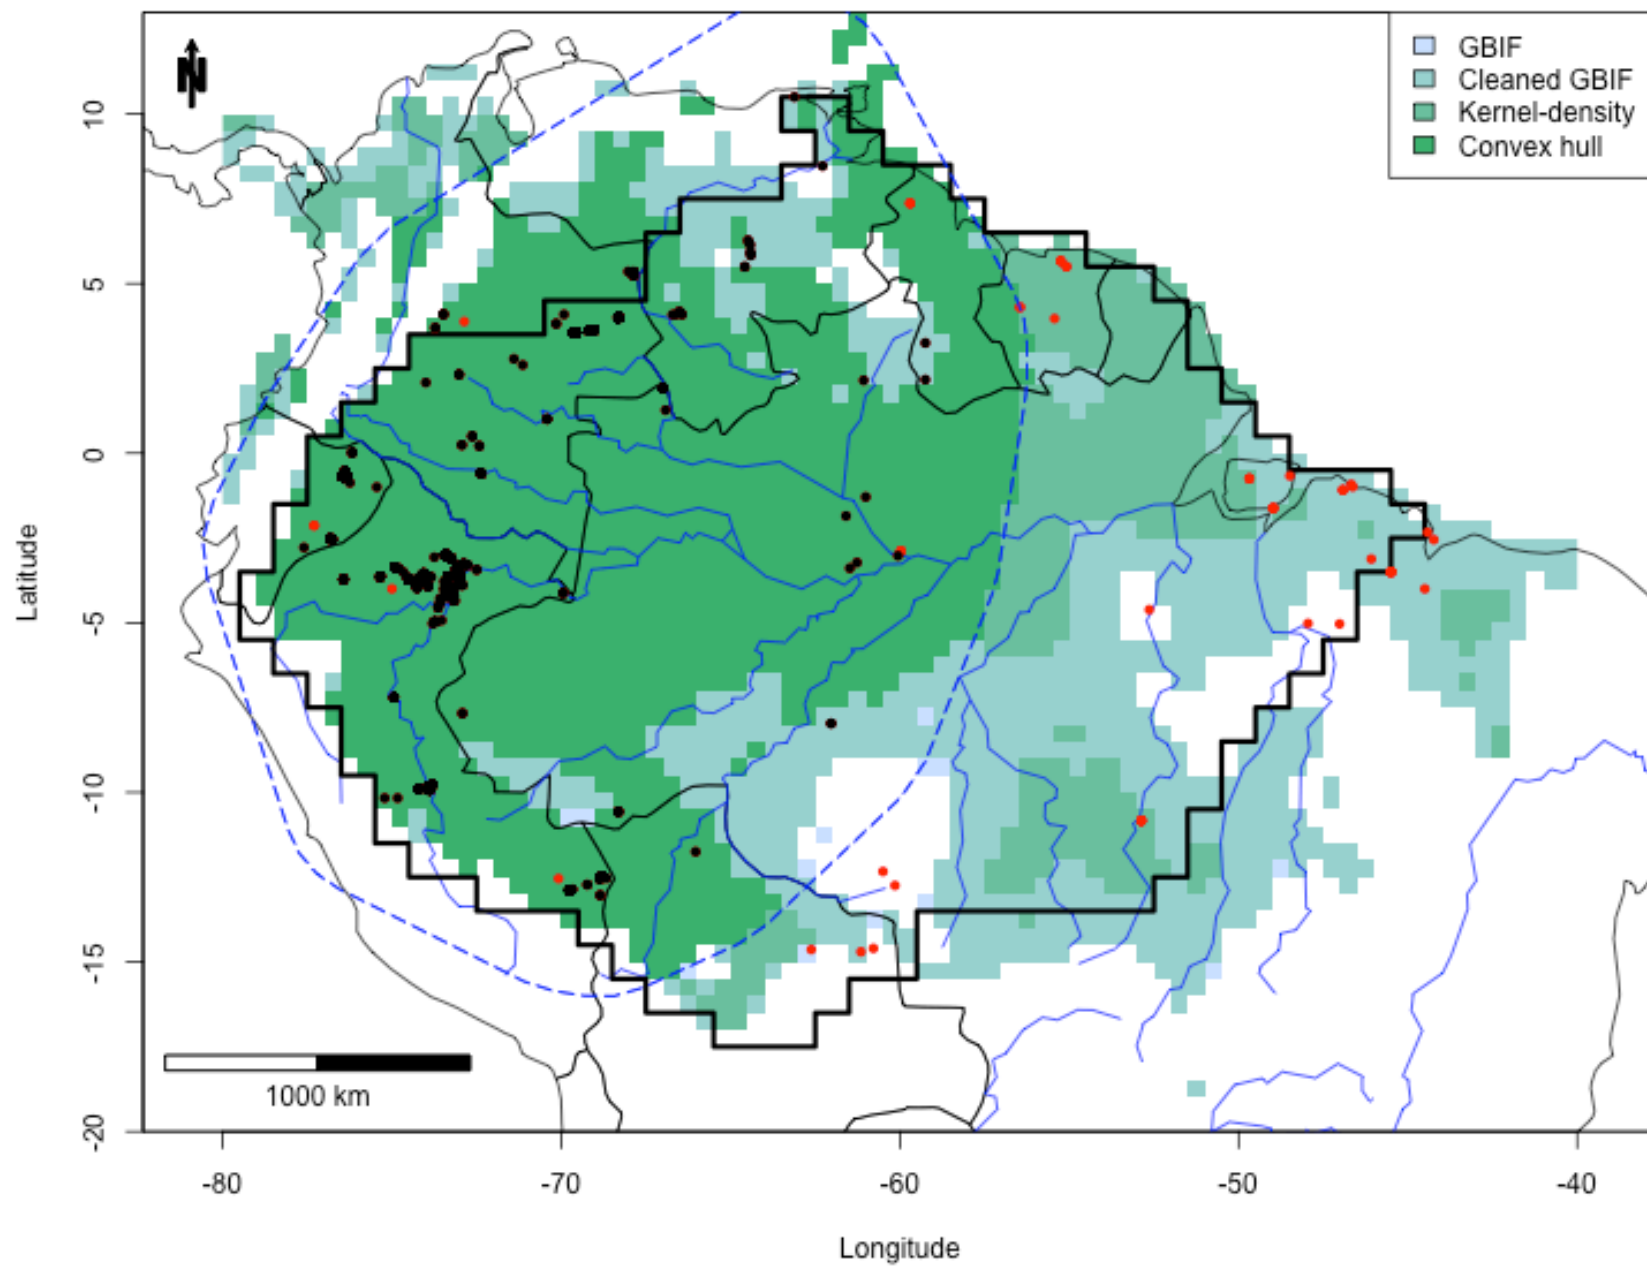

# Attalea phalerata

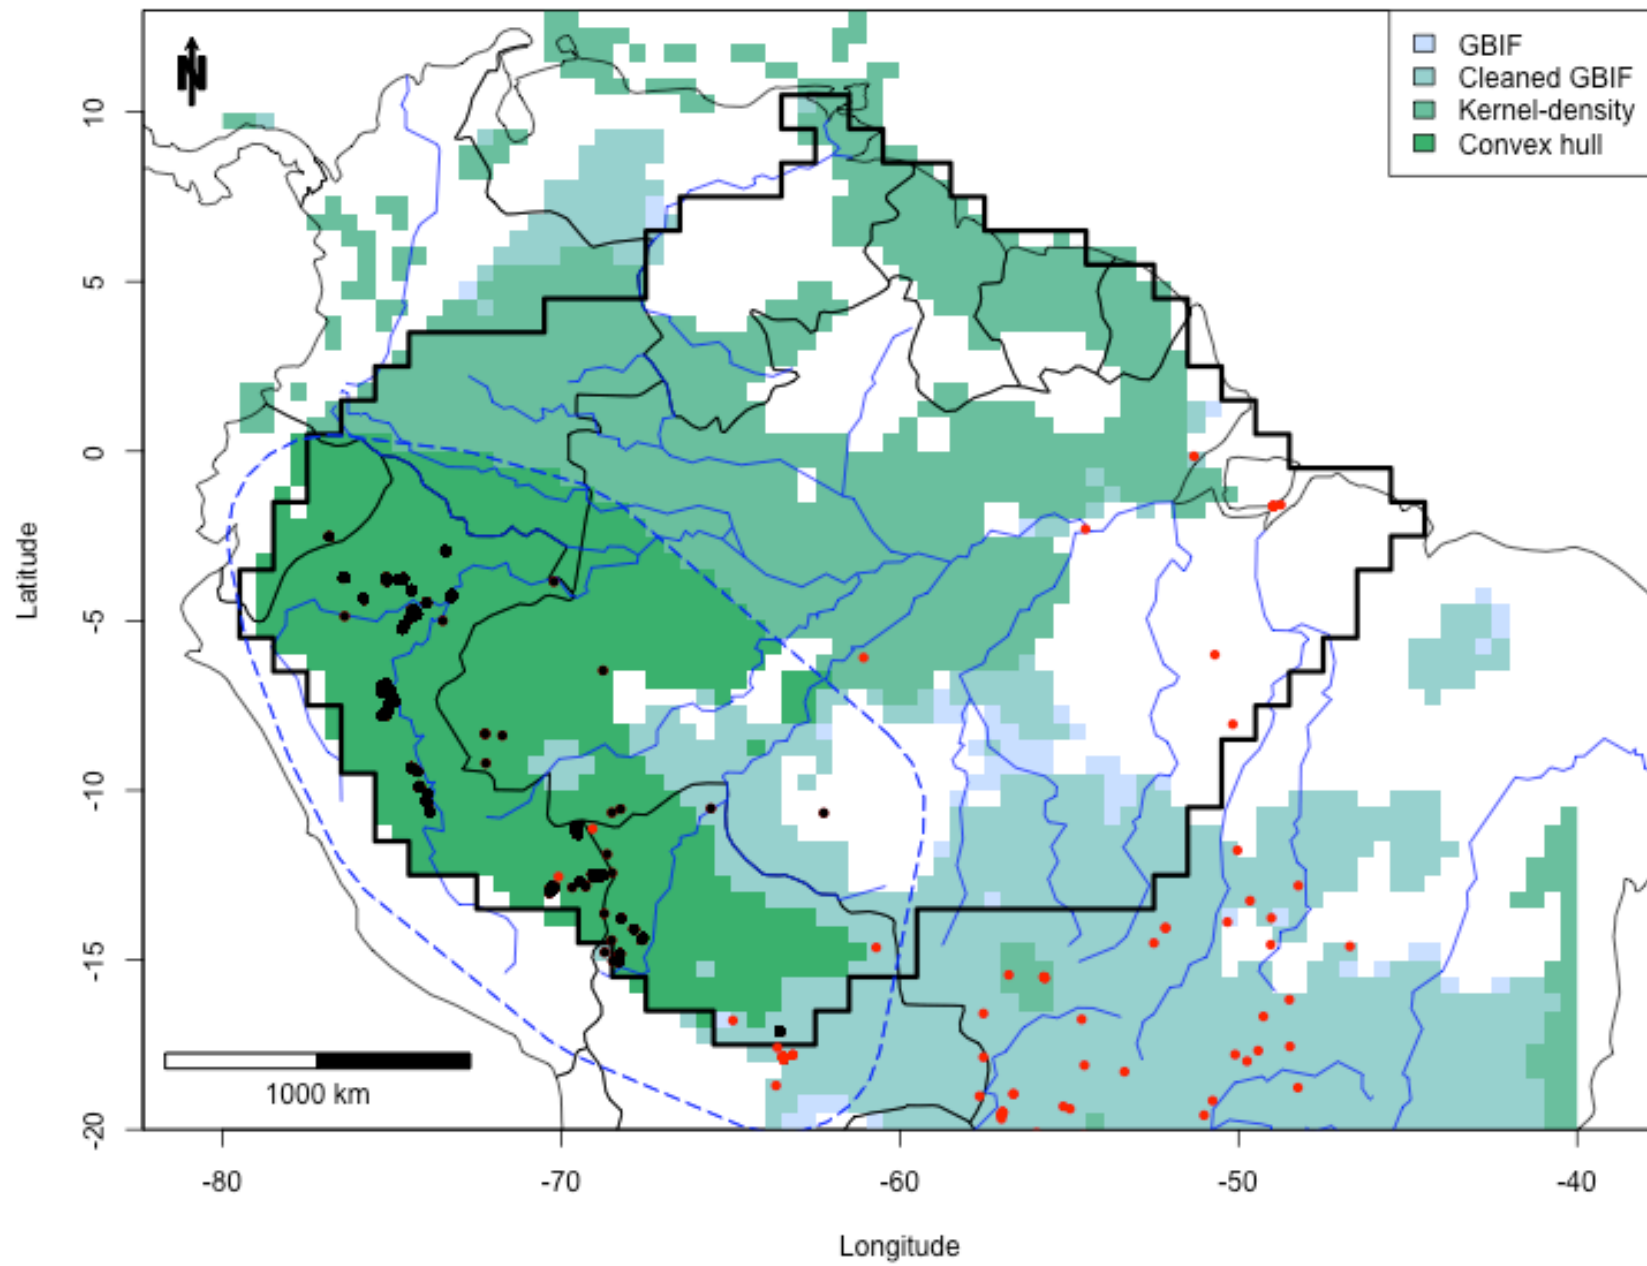

# Attalea speciosa

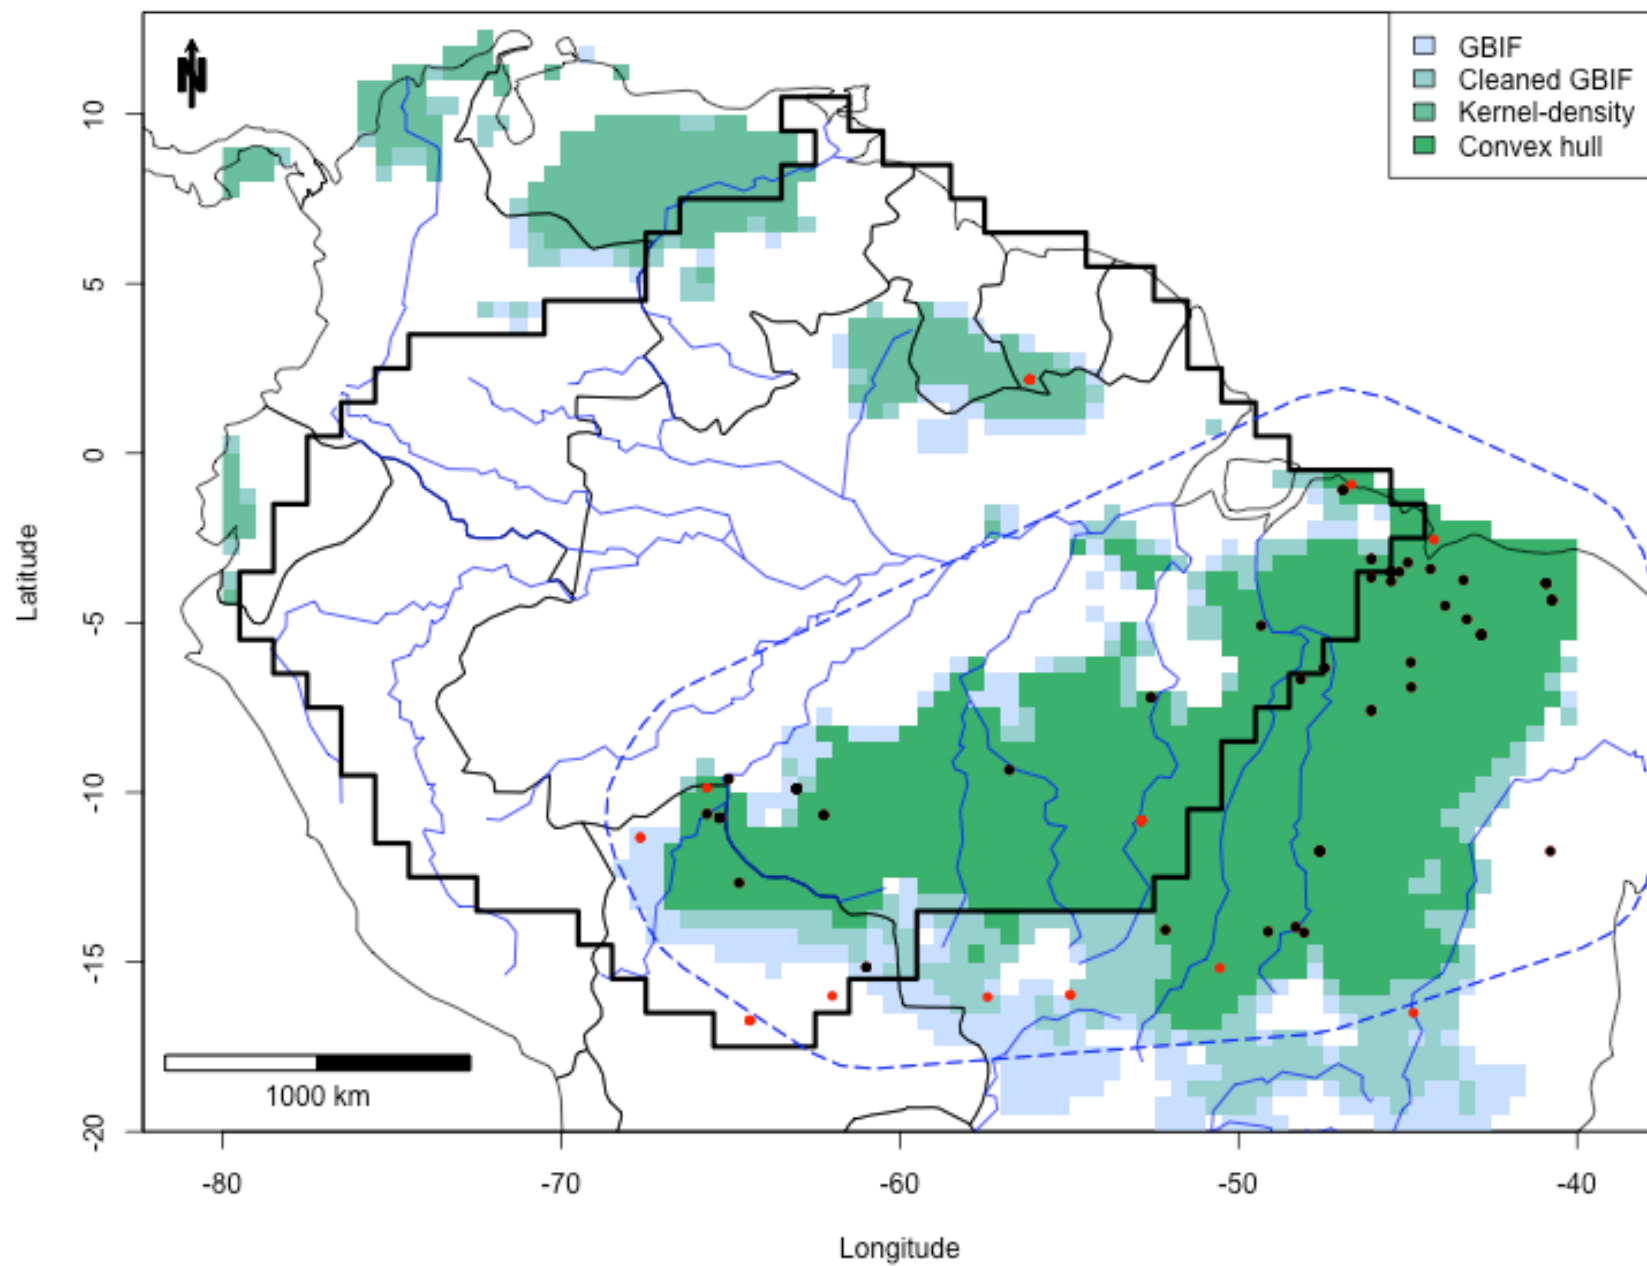

# Bertholletia excelsa

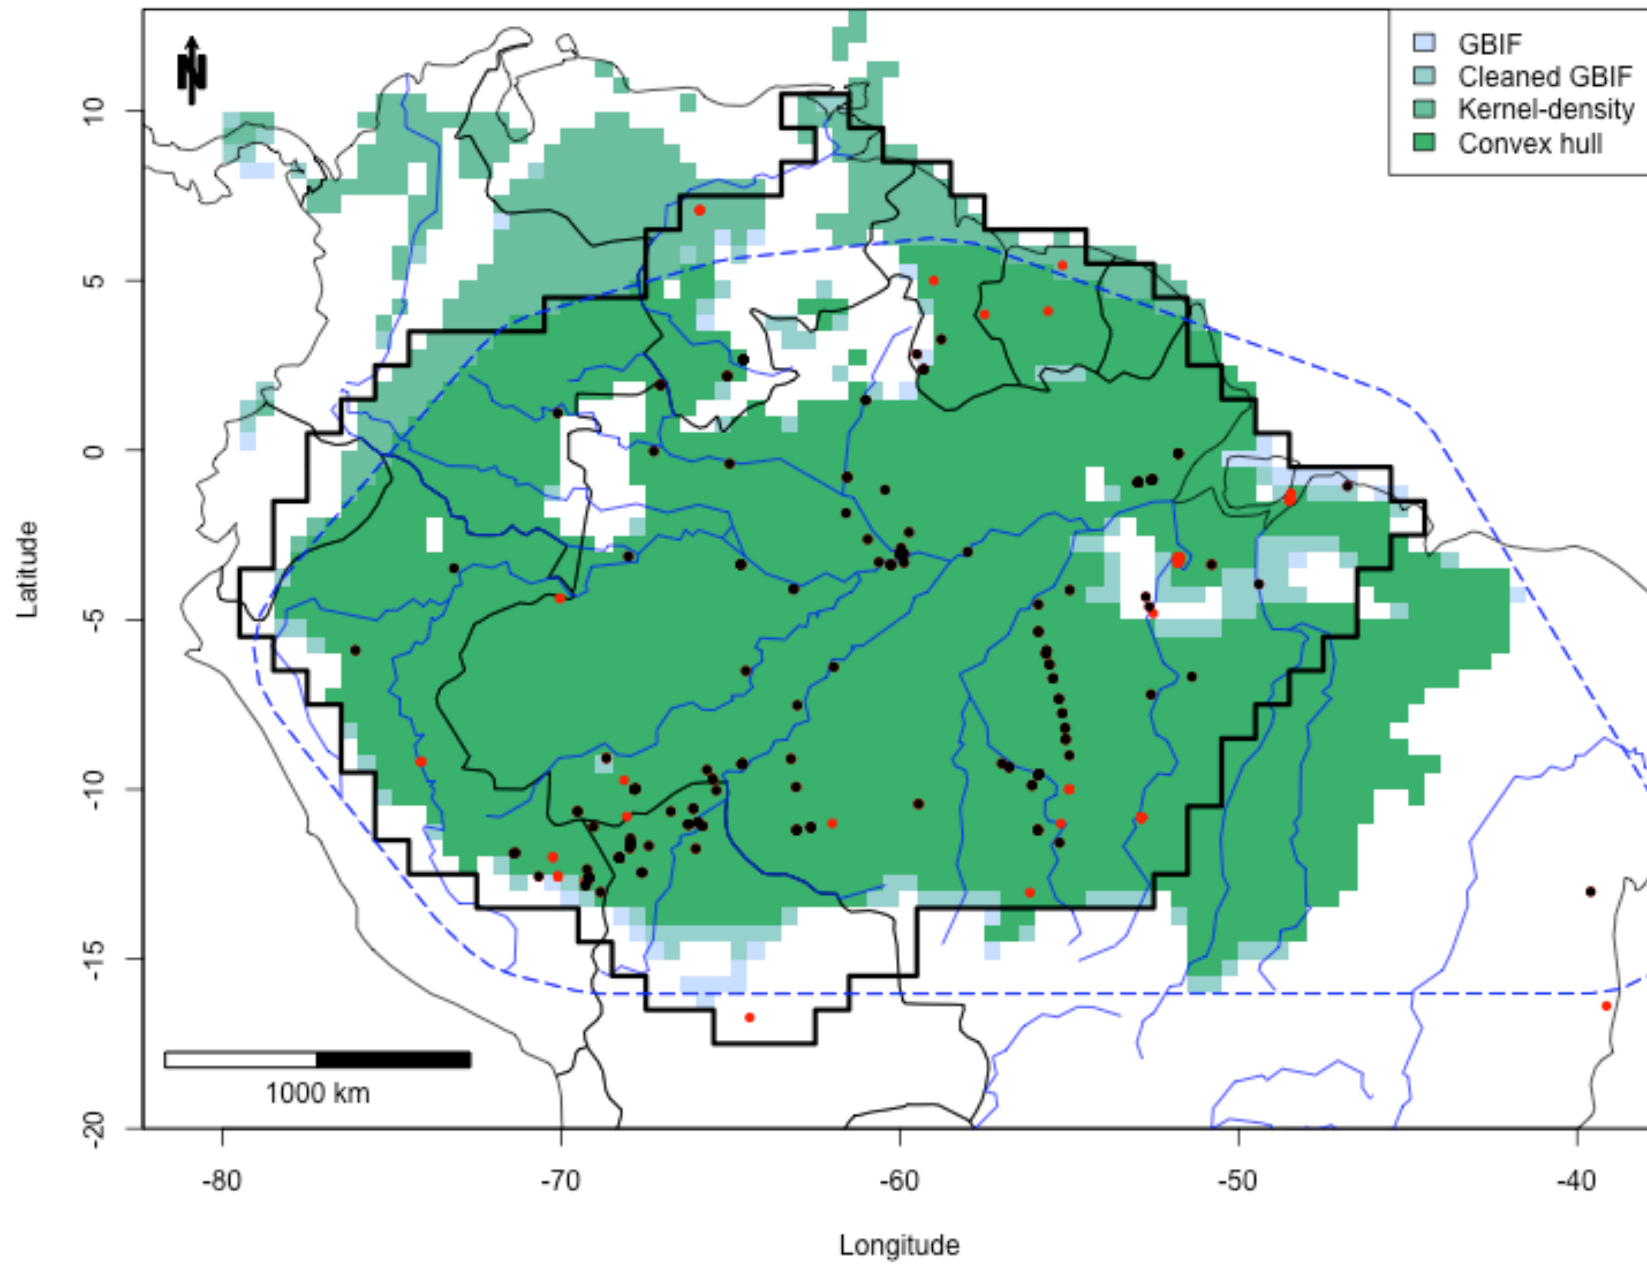



*Bocageopsis multiflora*

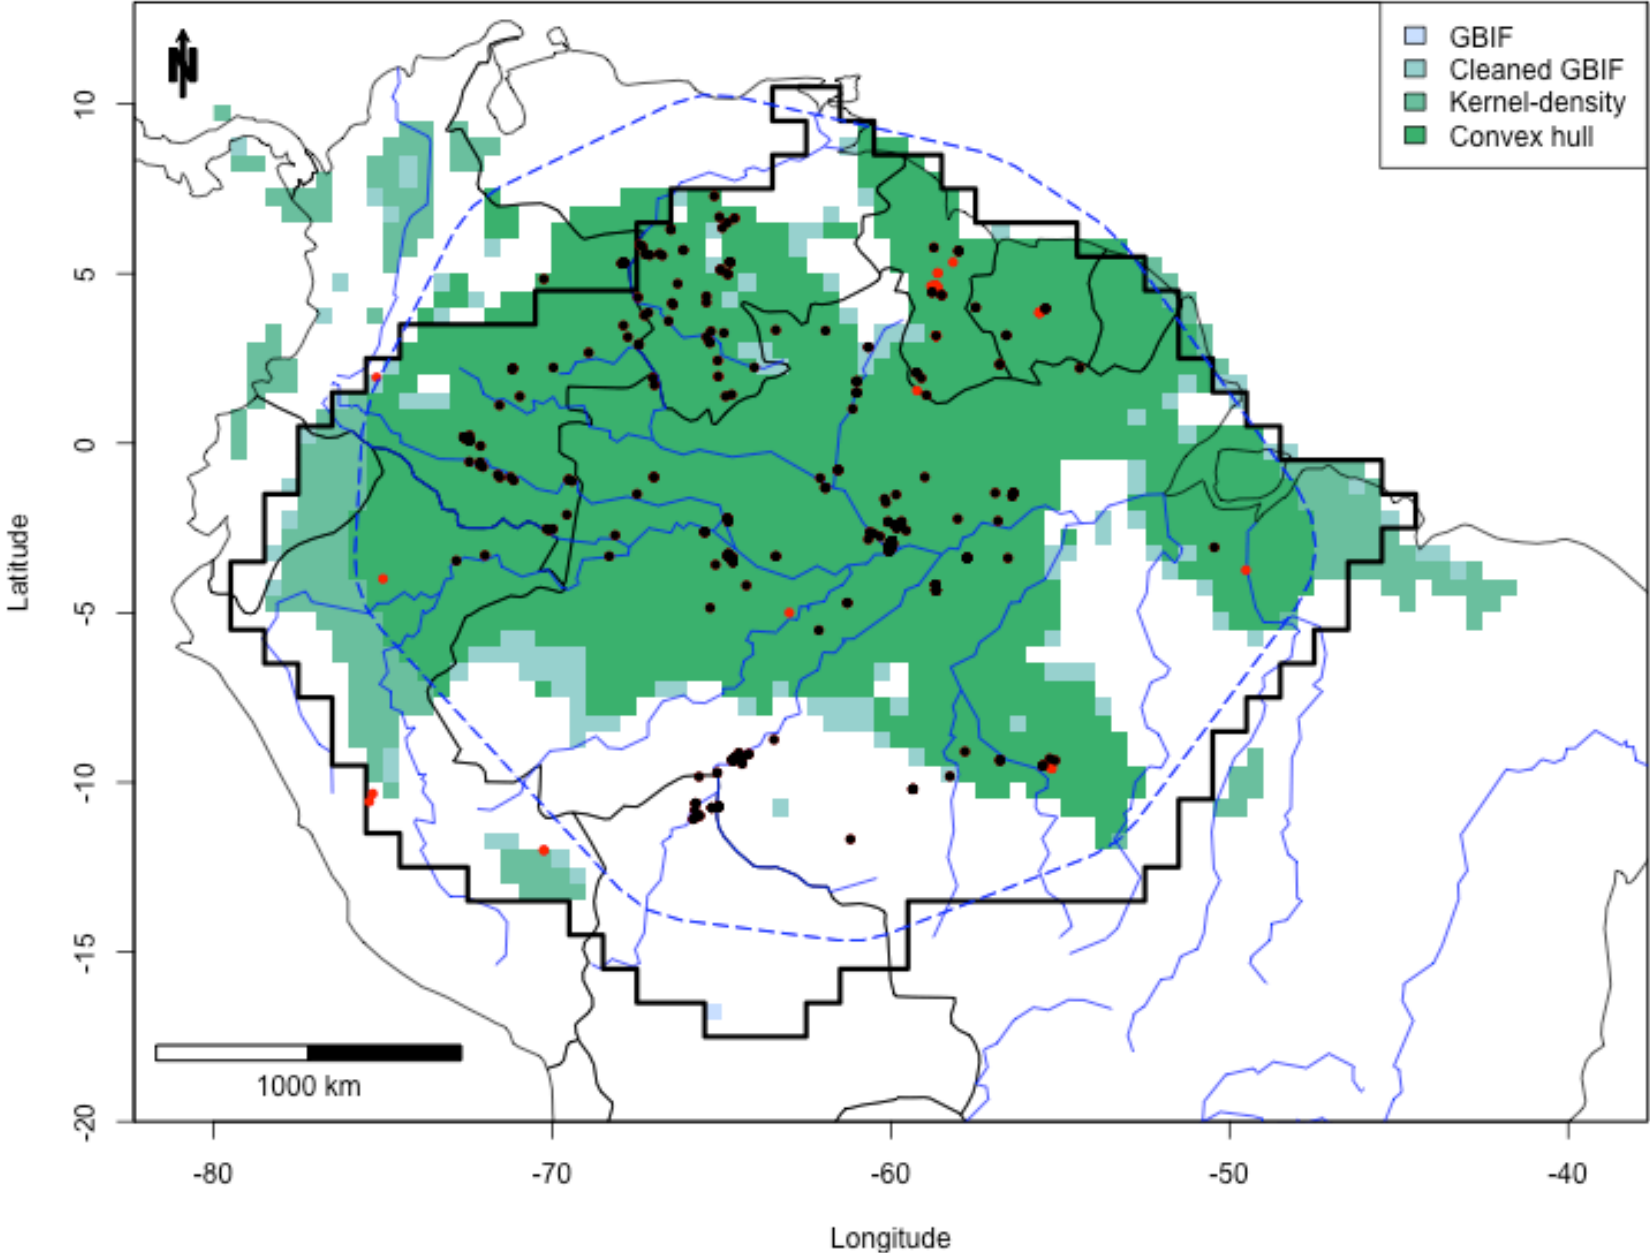

# Brosimum guianense

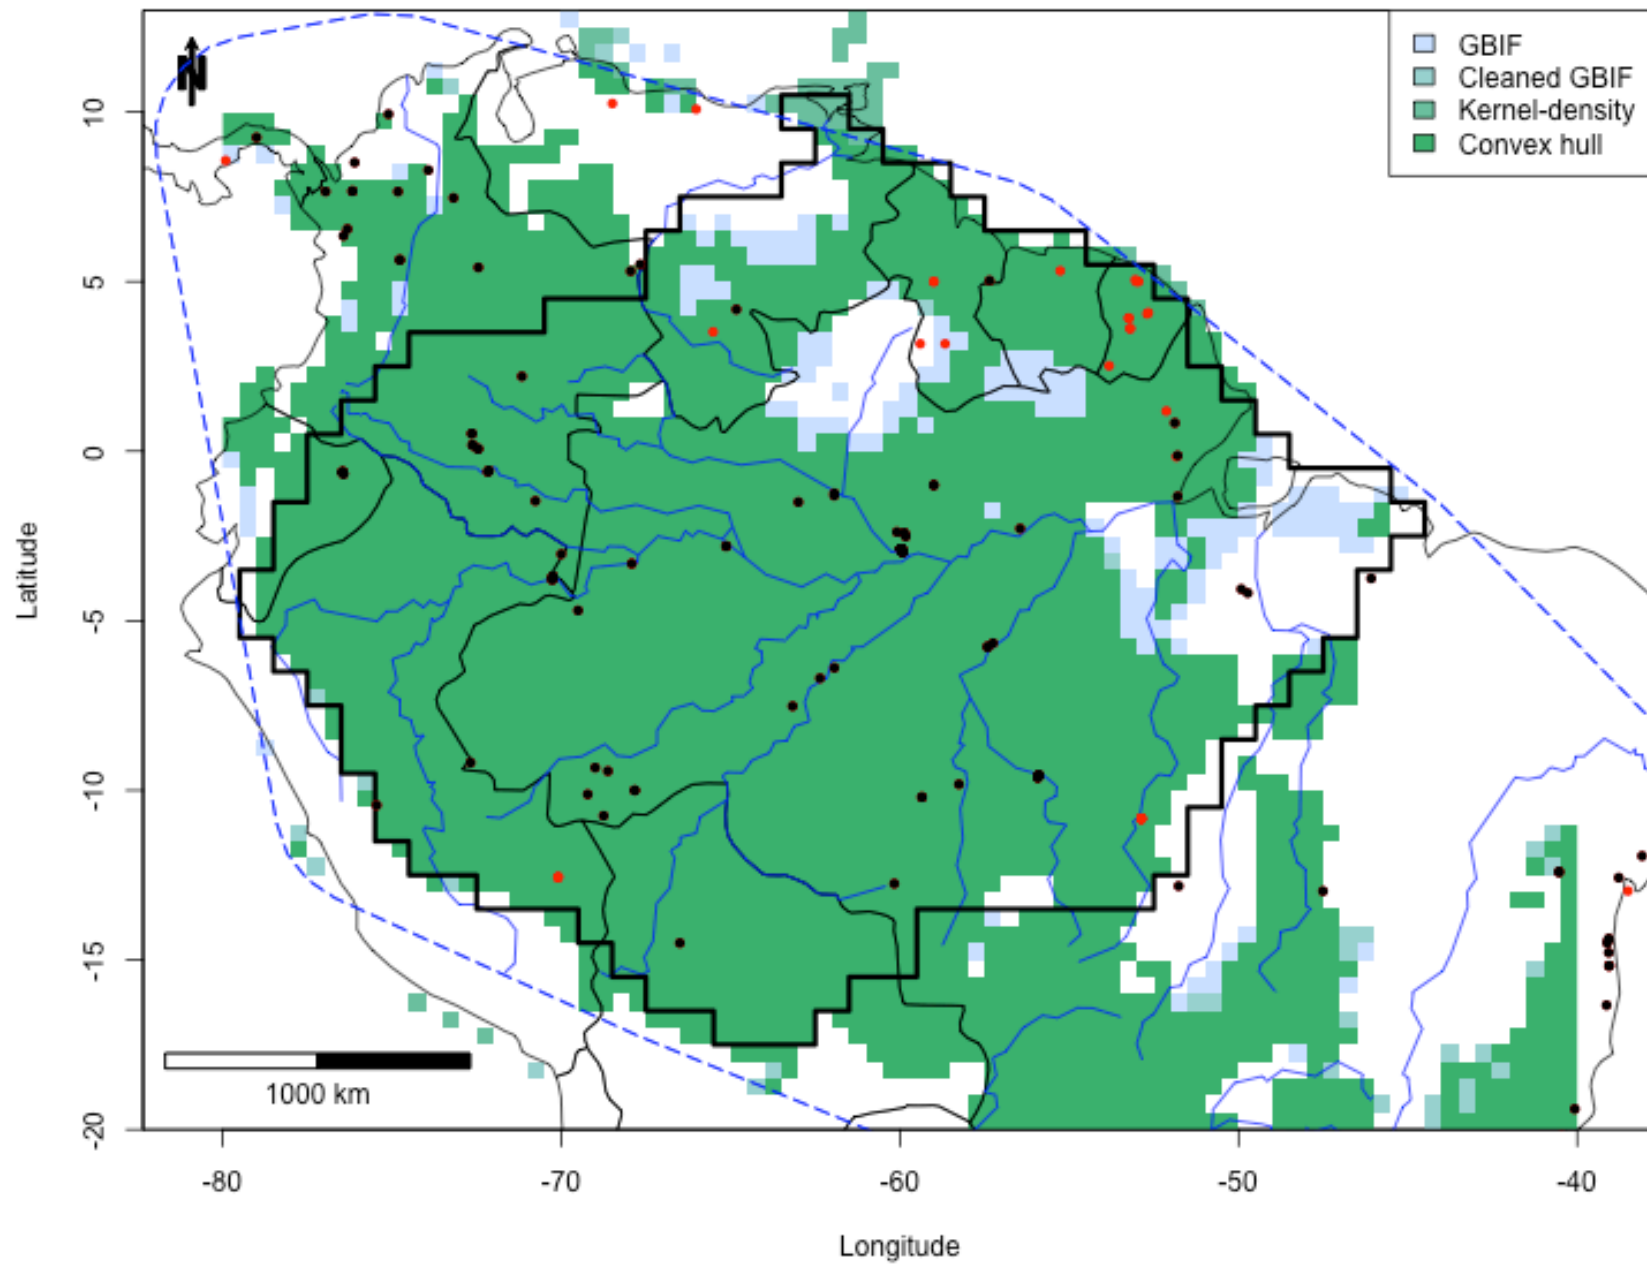

# Brosimum lactescens

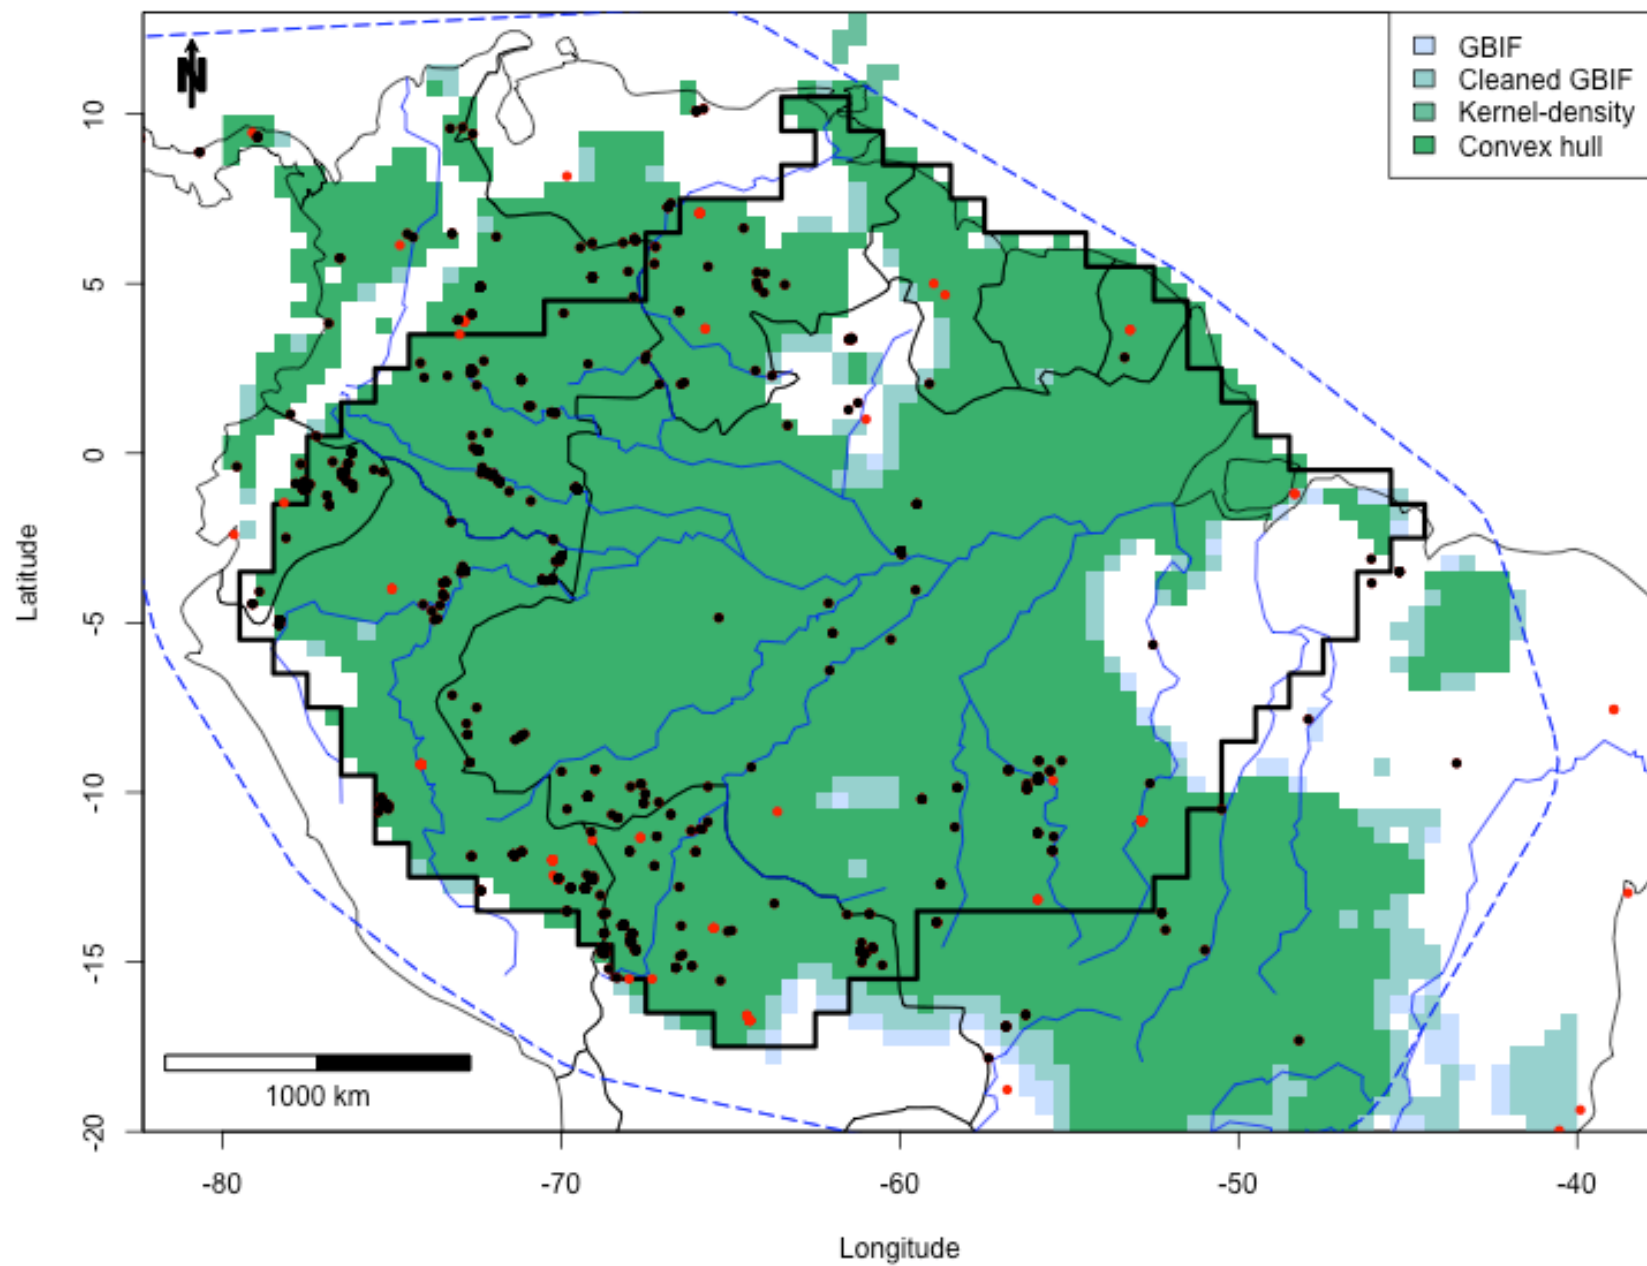

# *Brosimum rubescens*

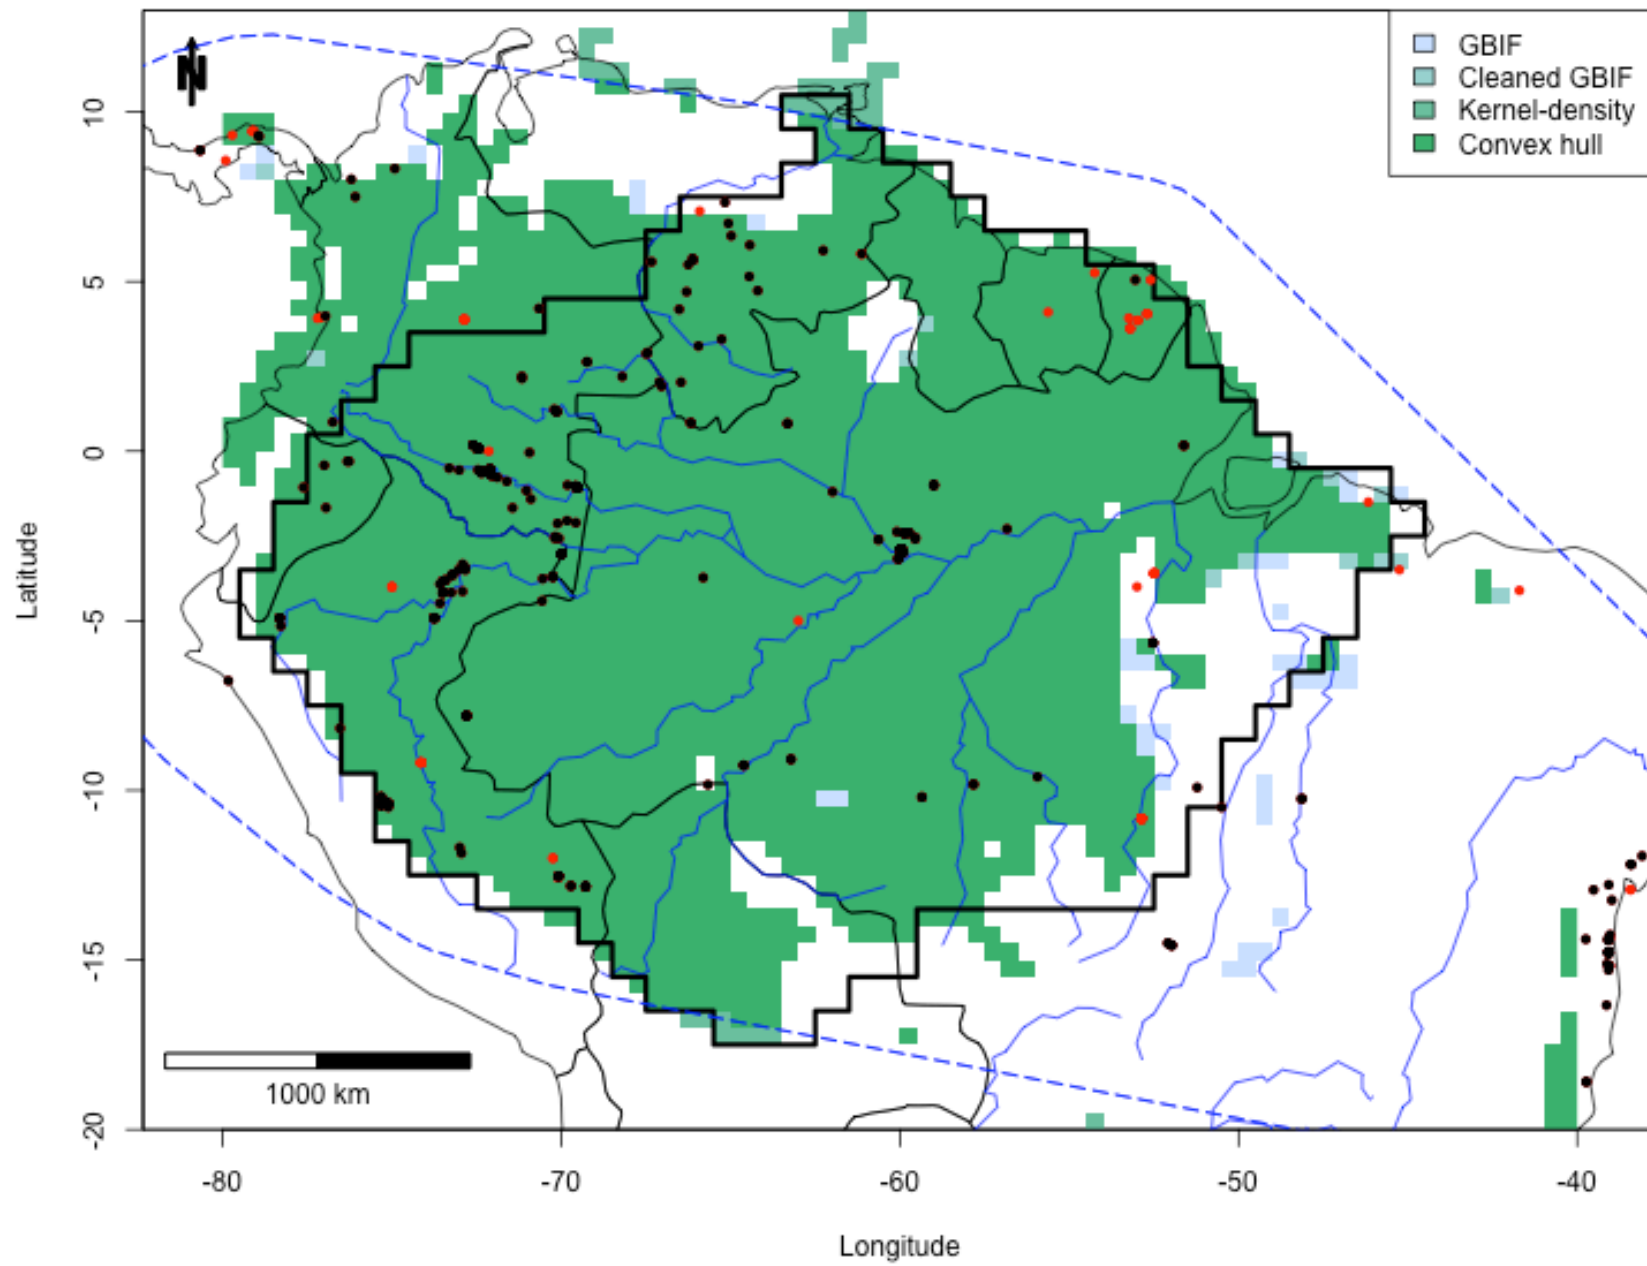

# Brosimum utile

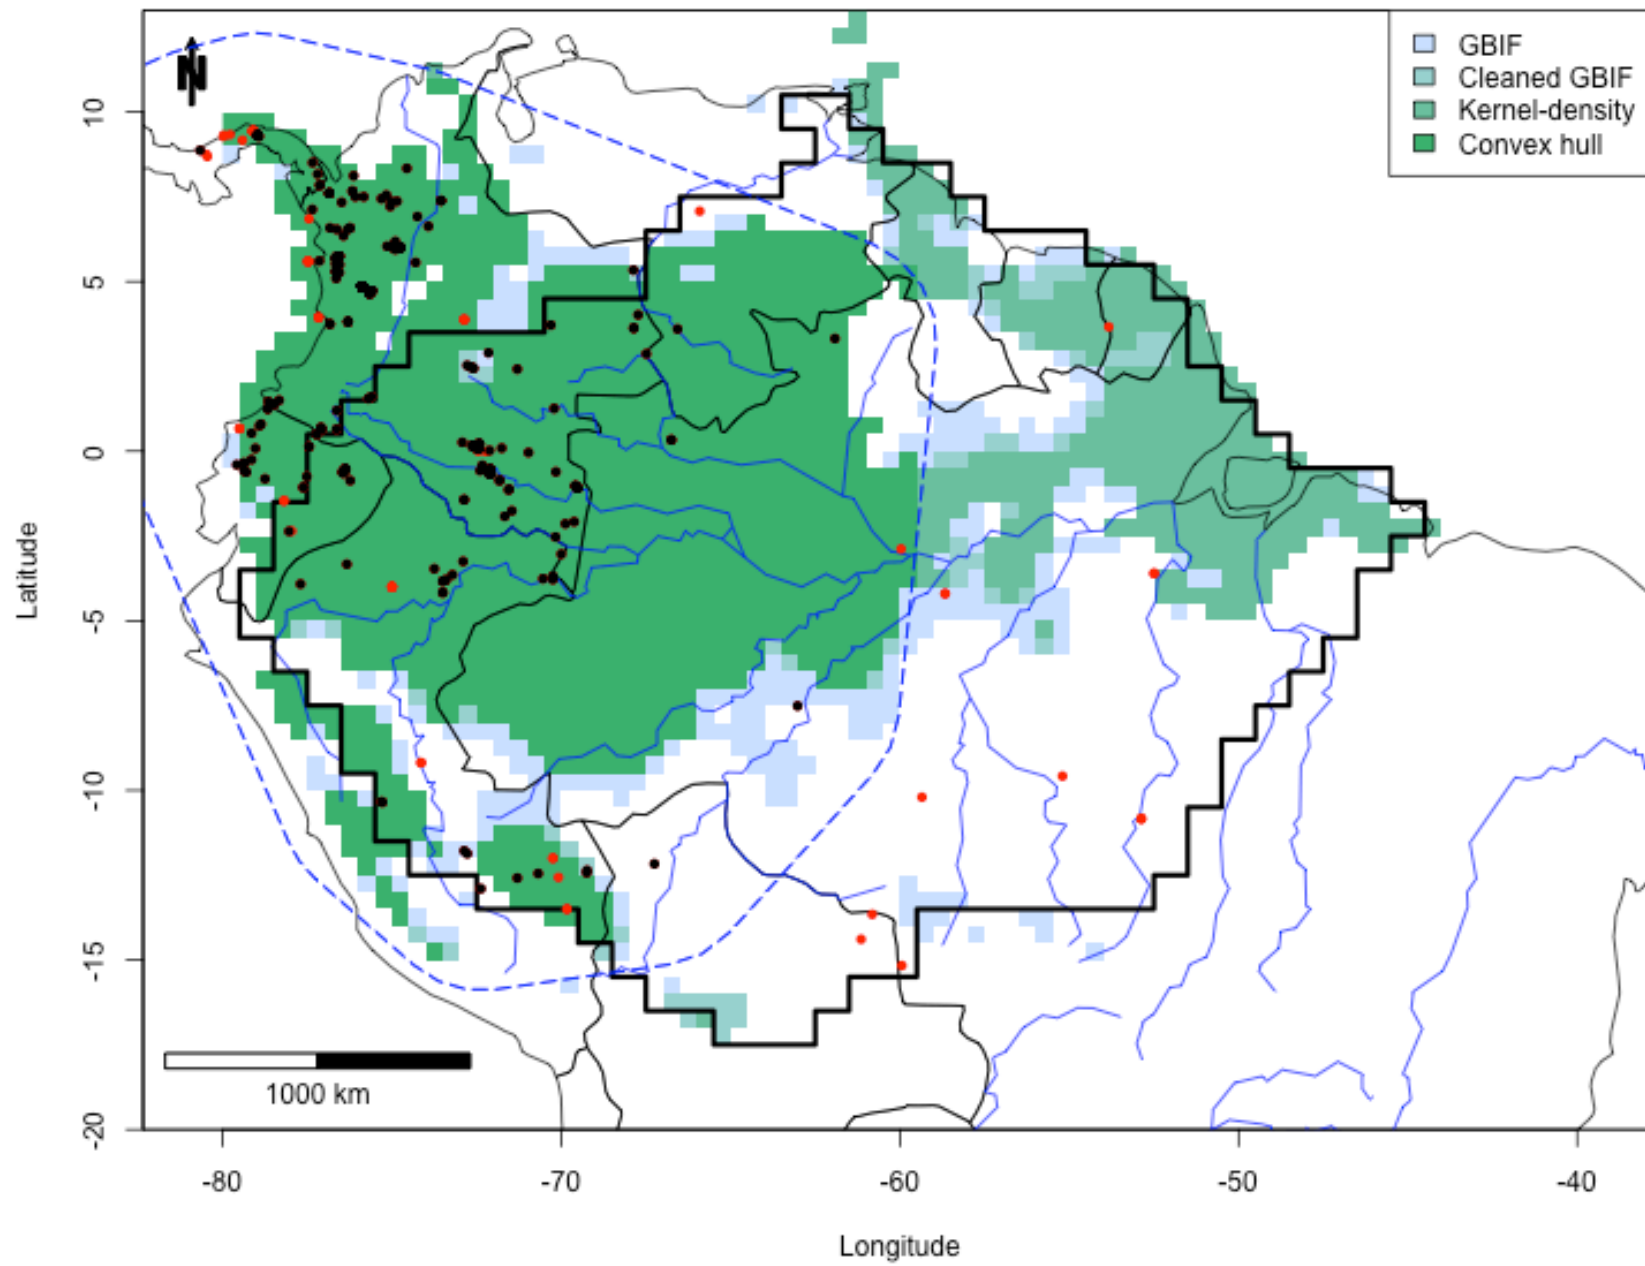

# Calophyllum brasiliense

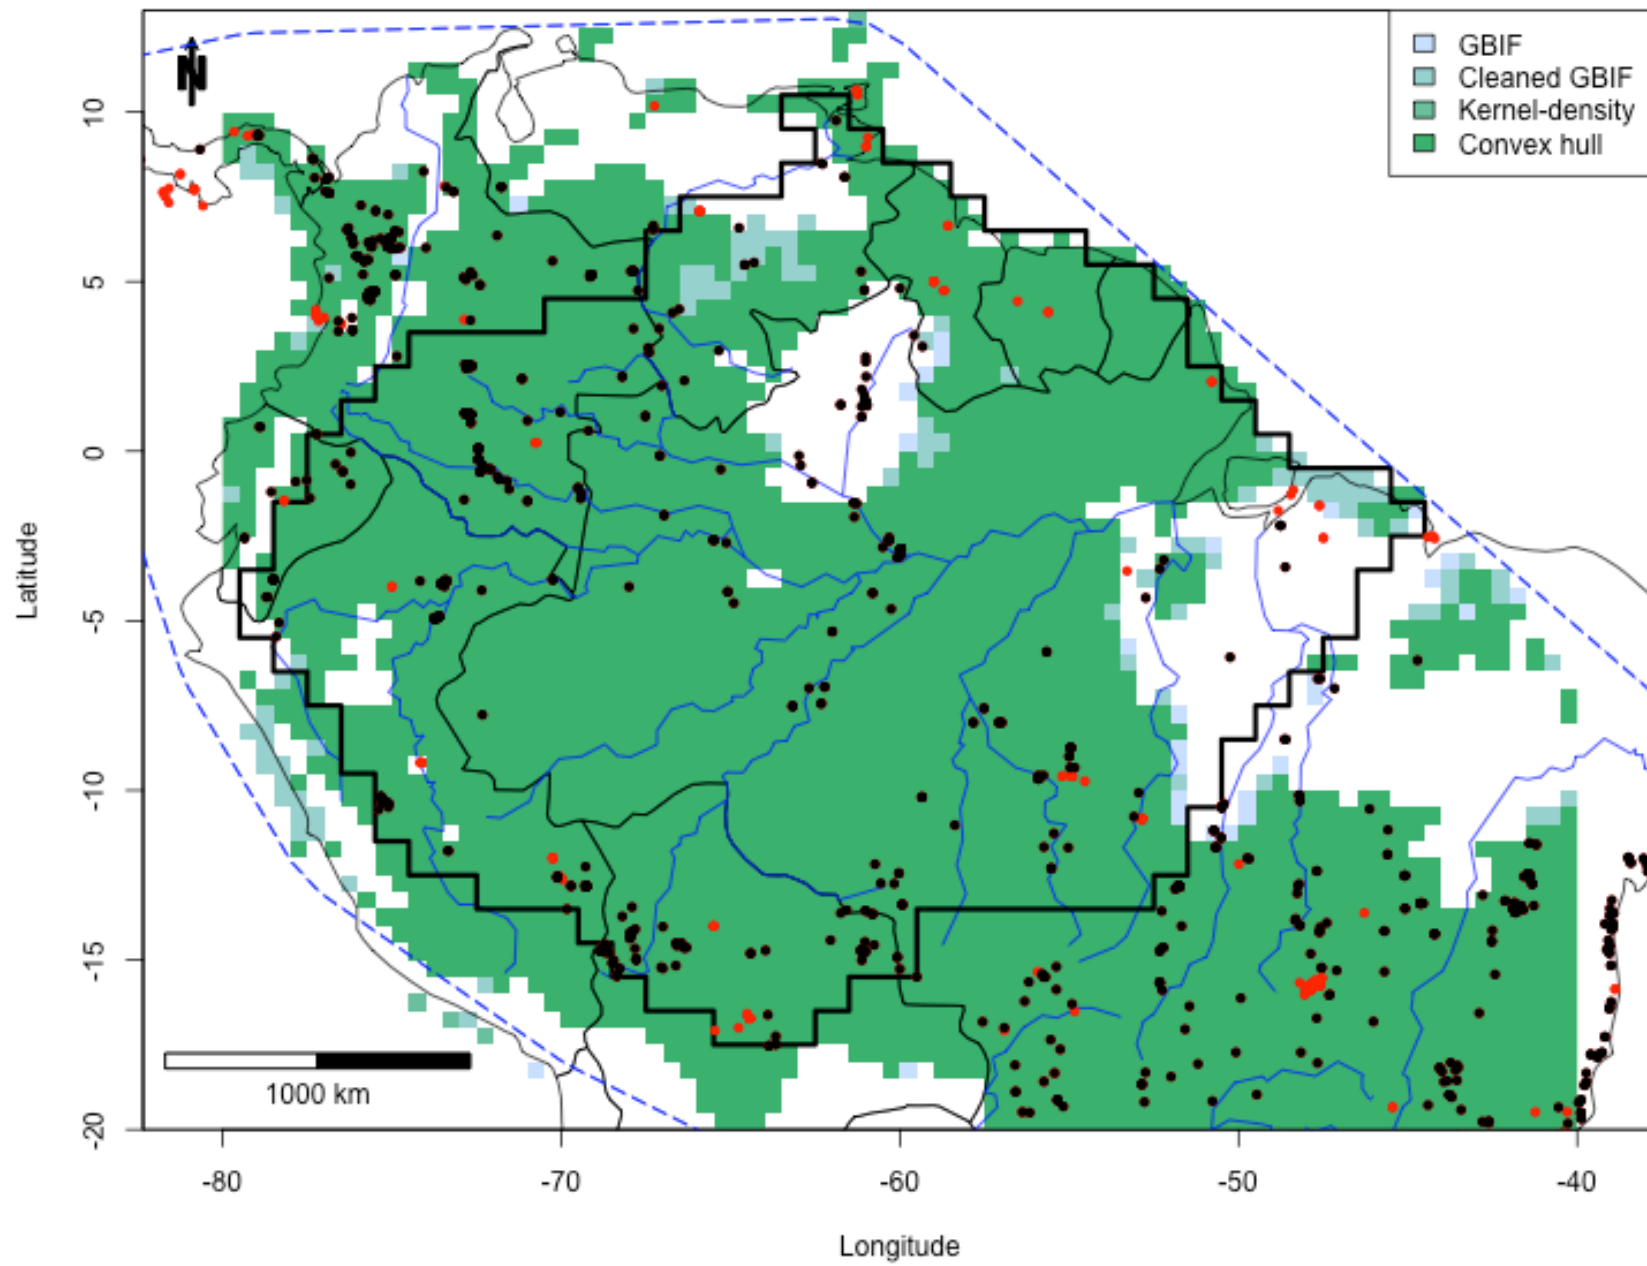

# Campsiandra implexicaulis

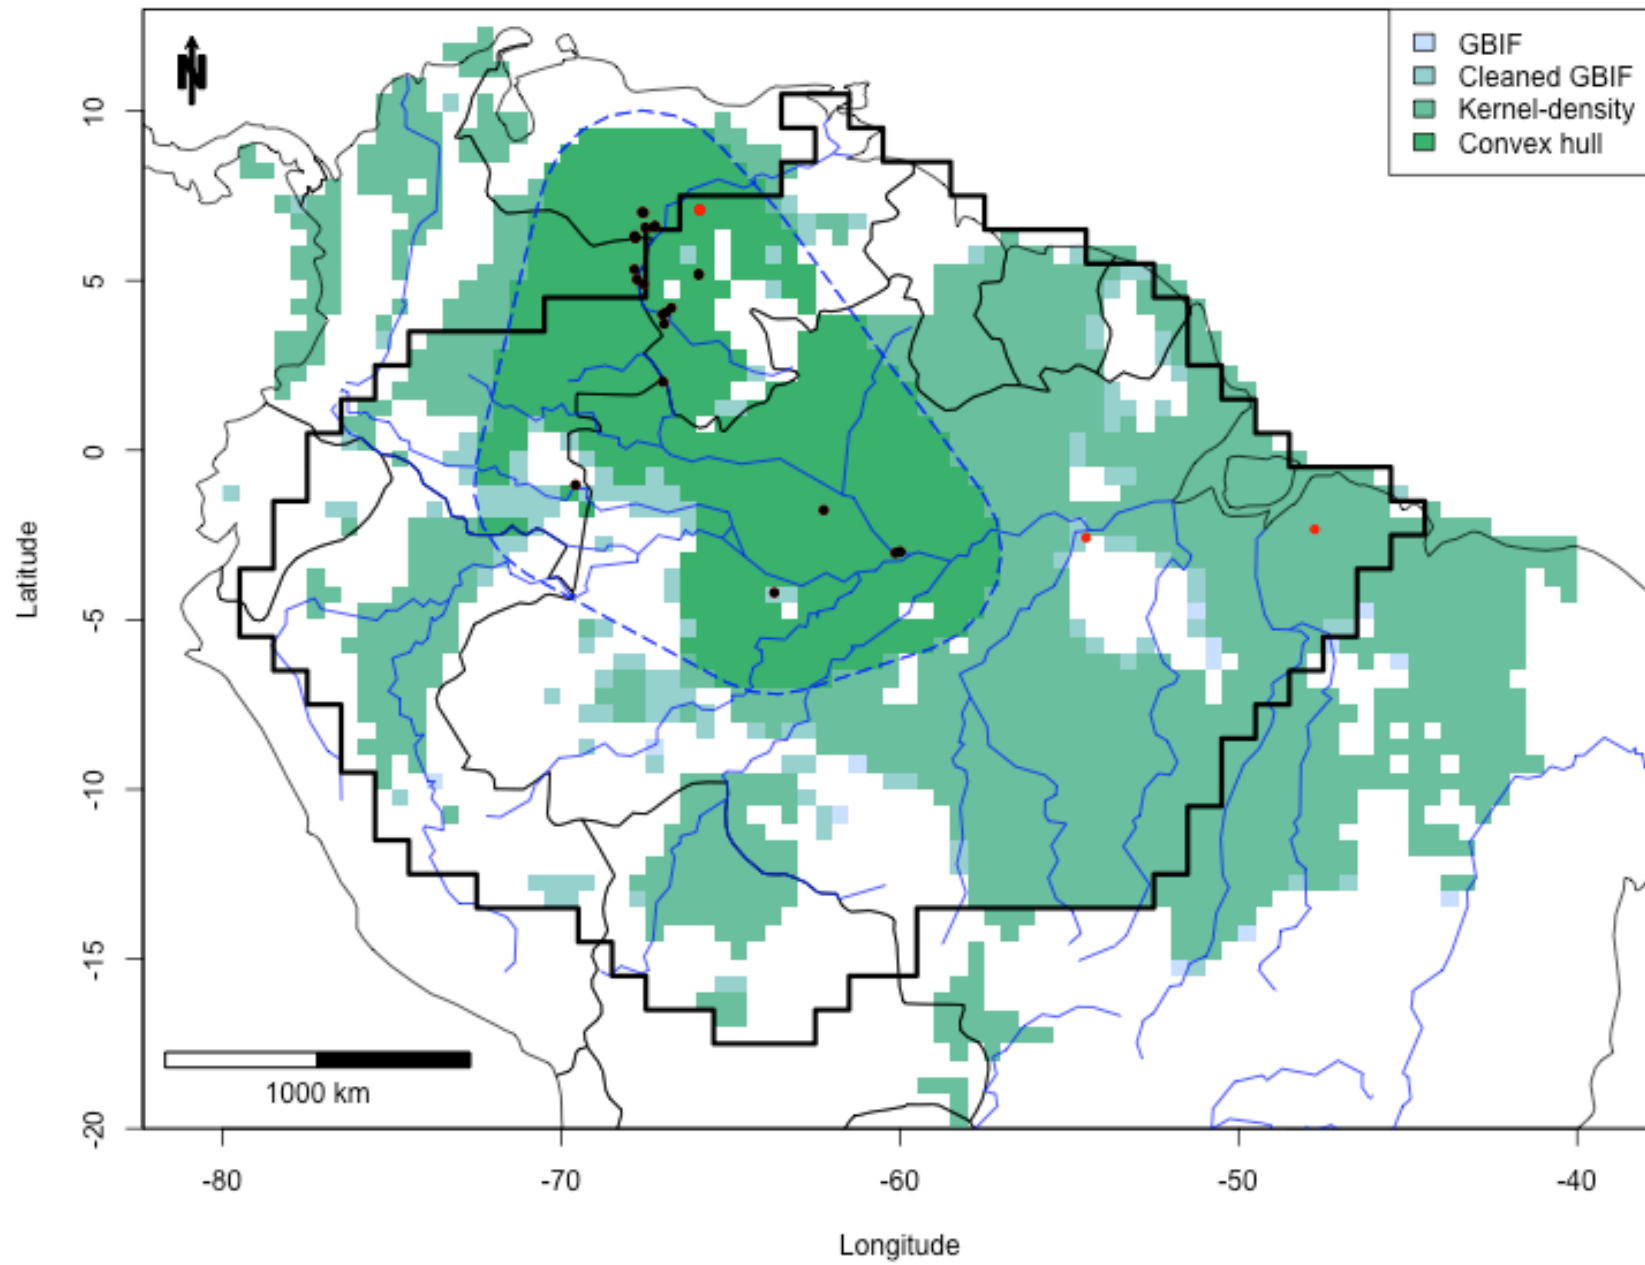



# Caraipa densifolia

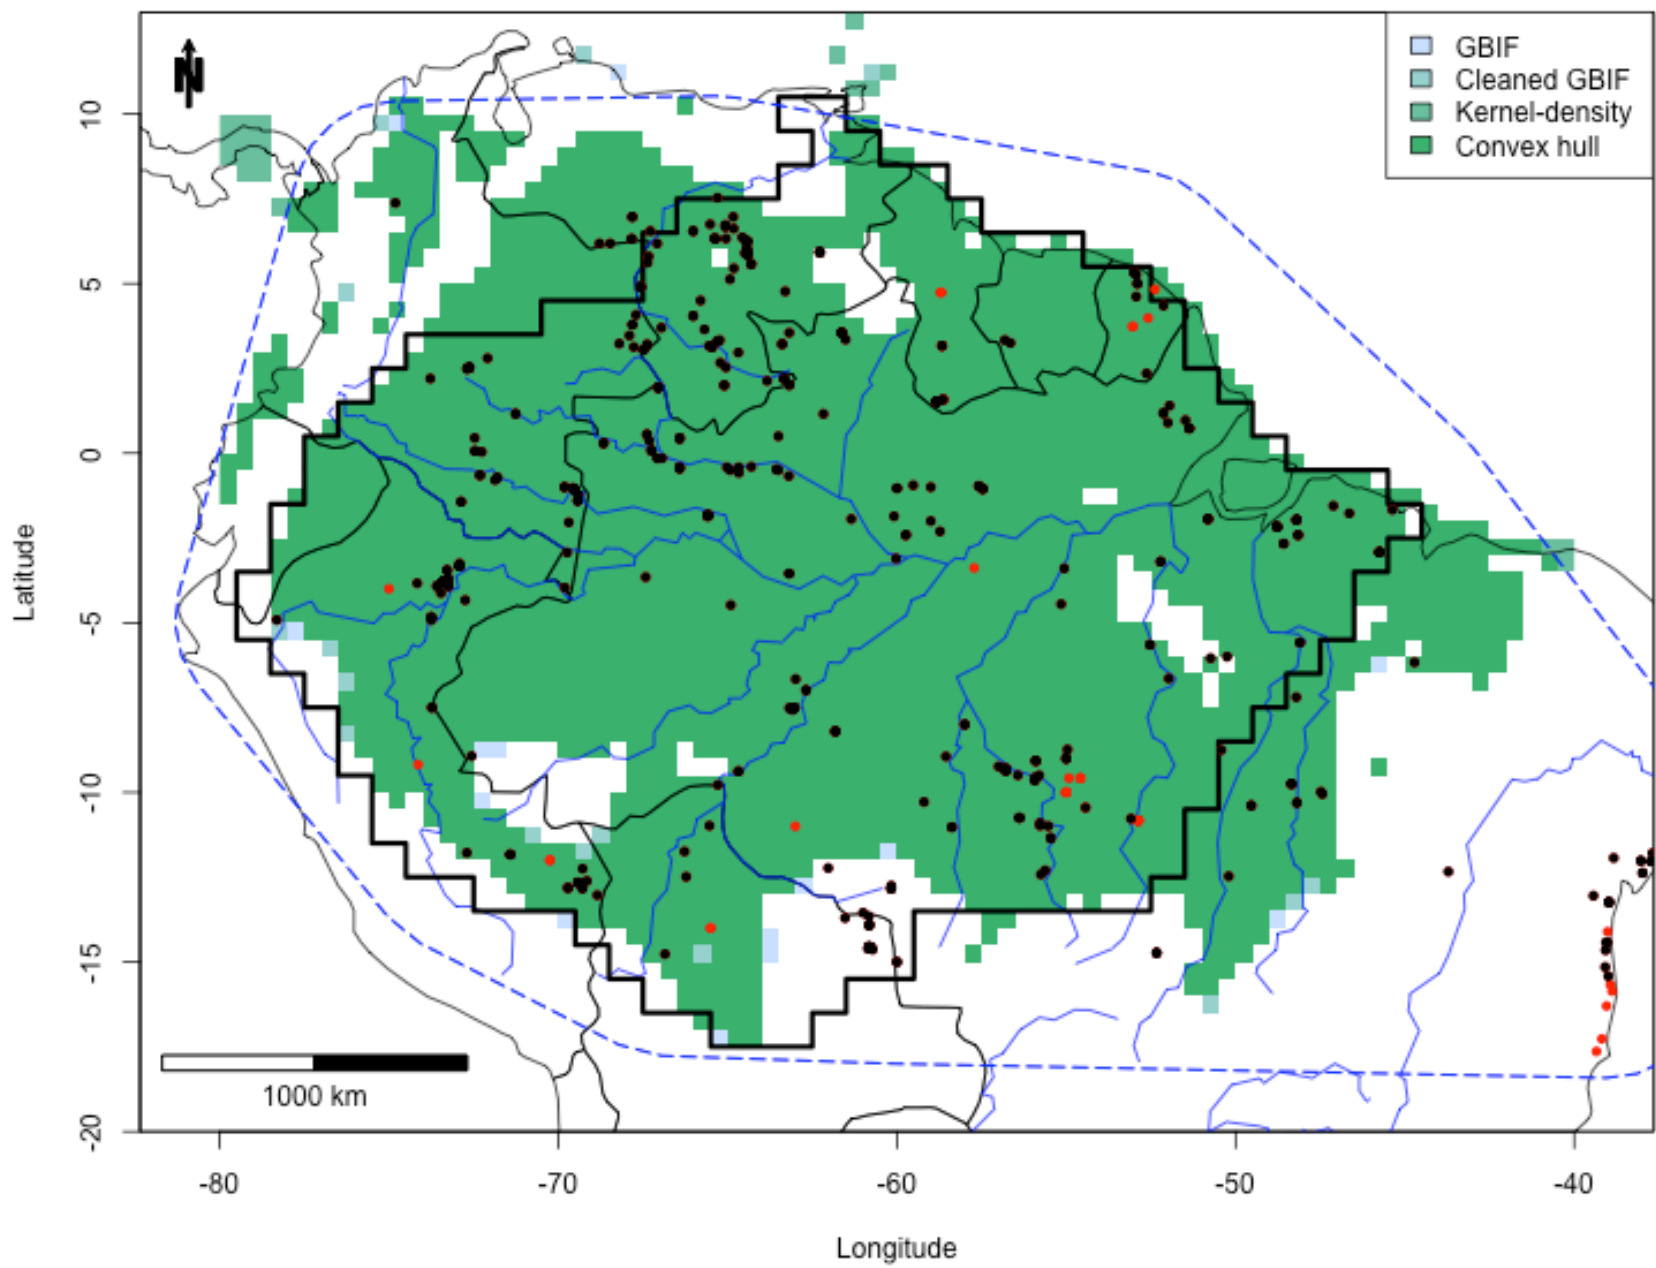



# Carapa guianensis

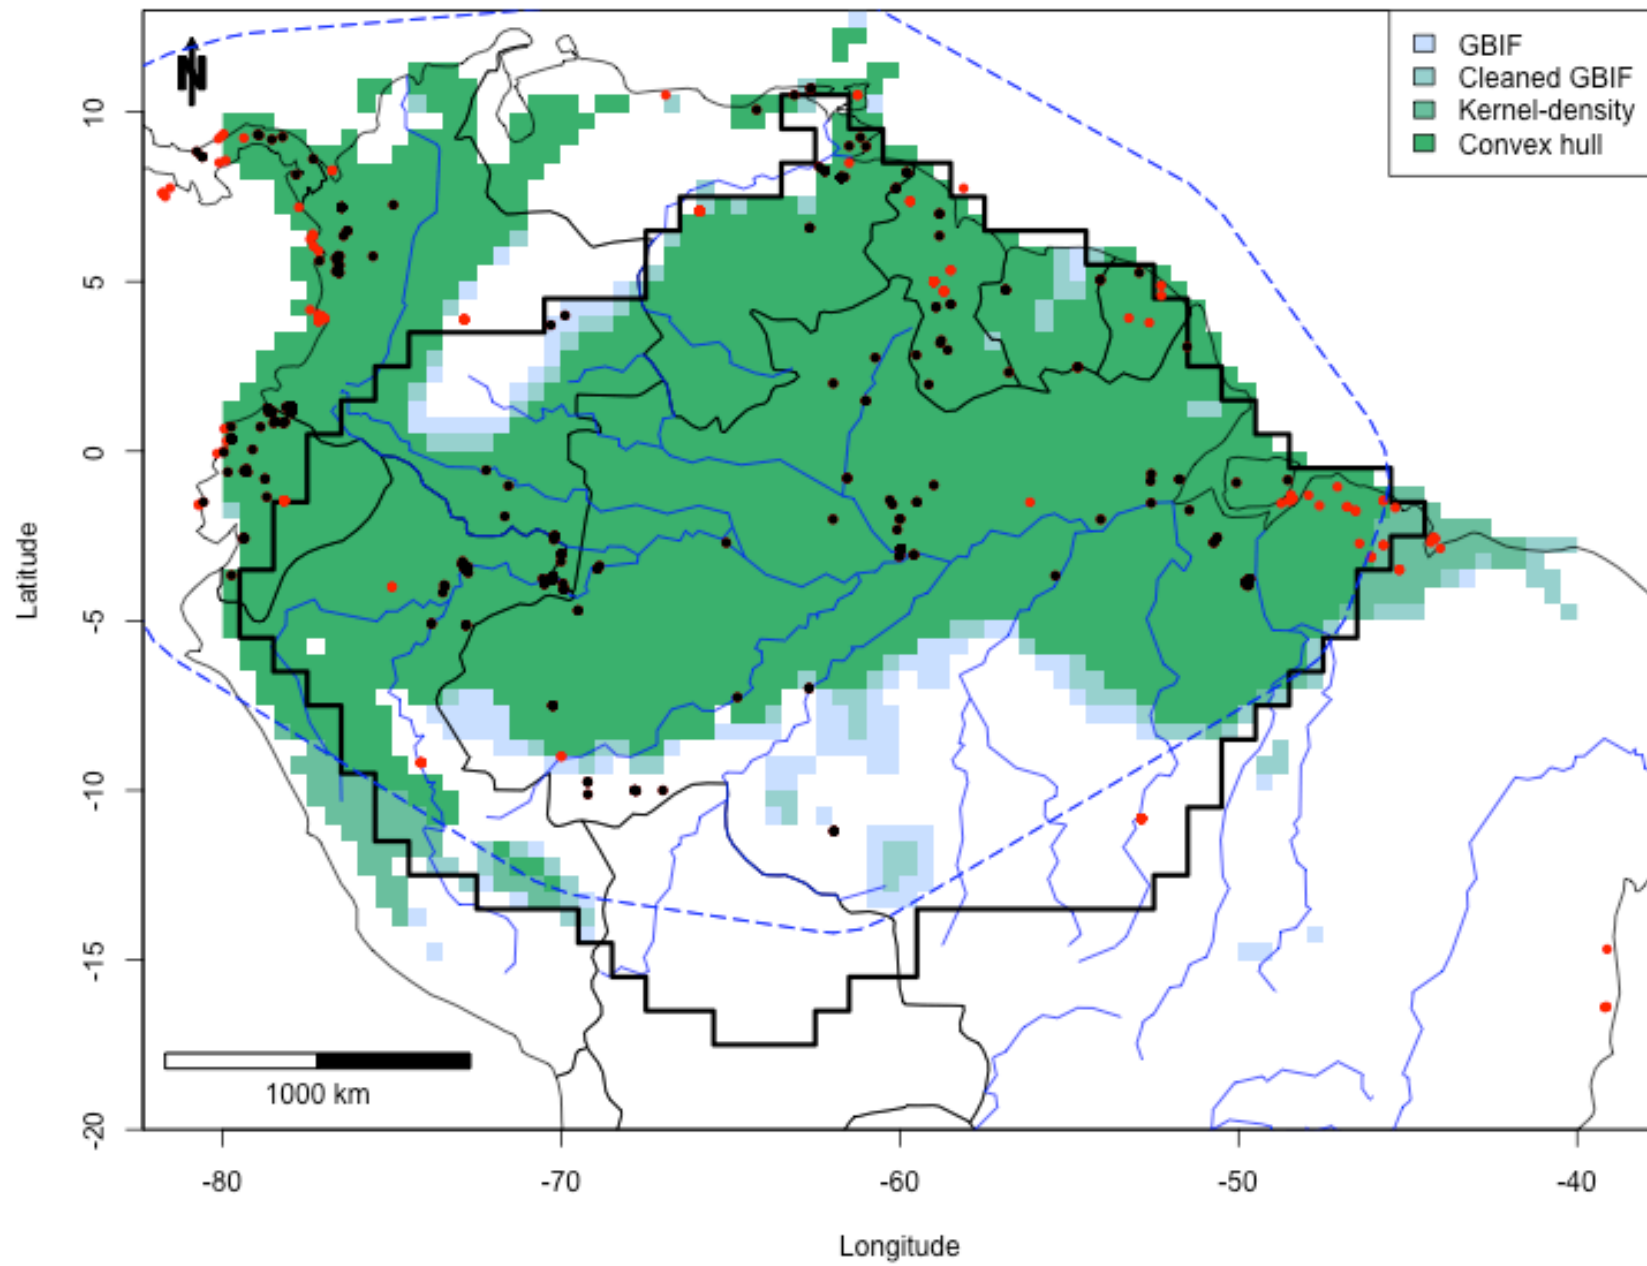

# Caryocar glabrum

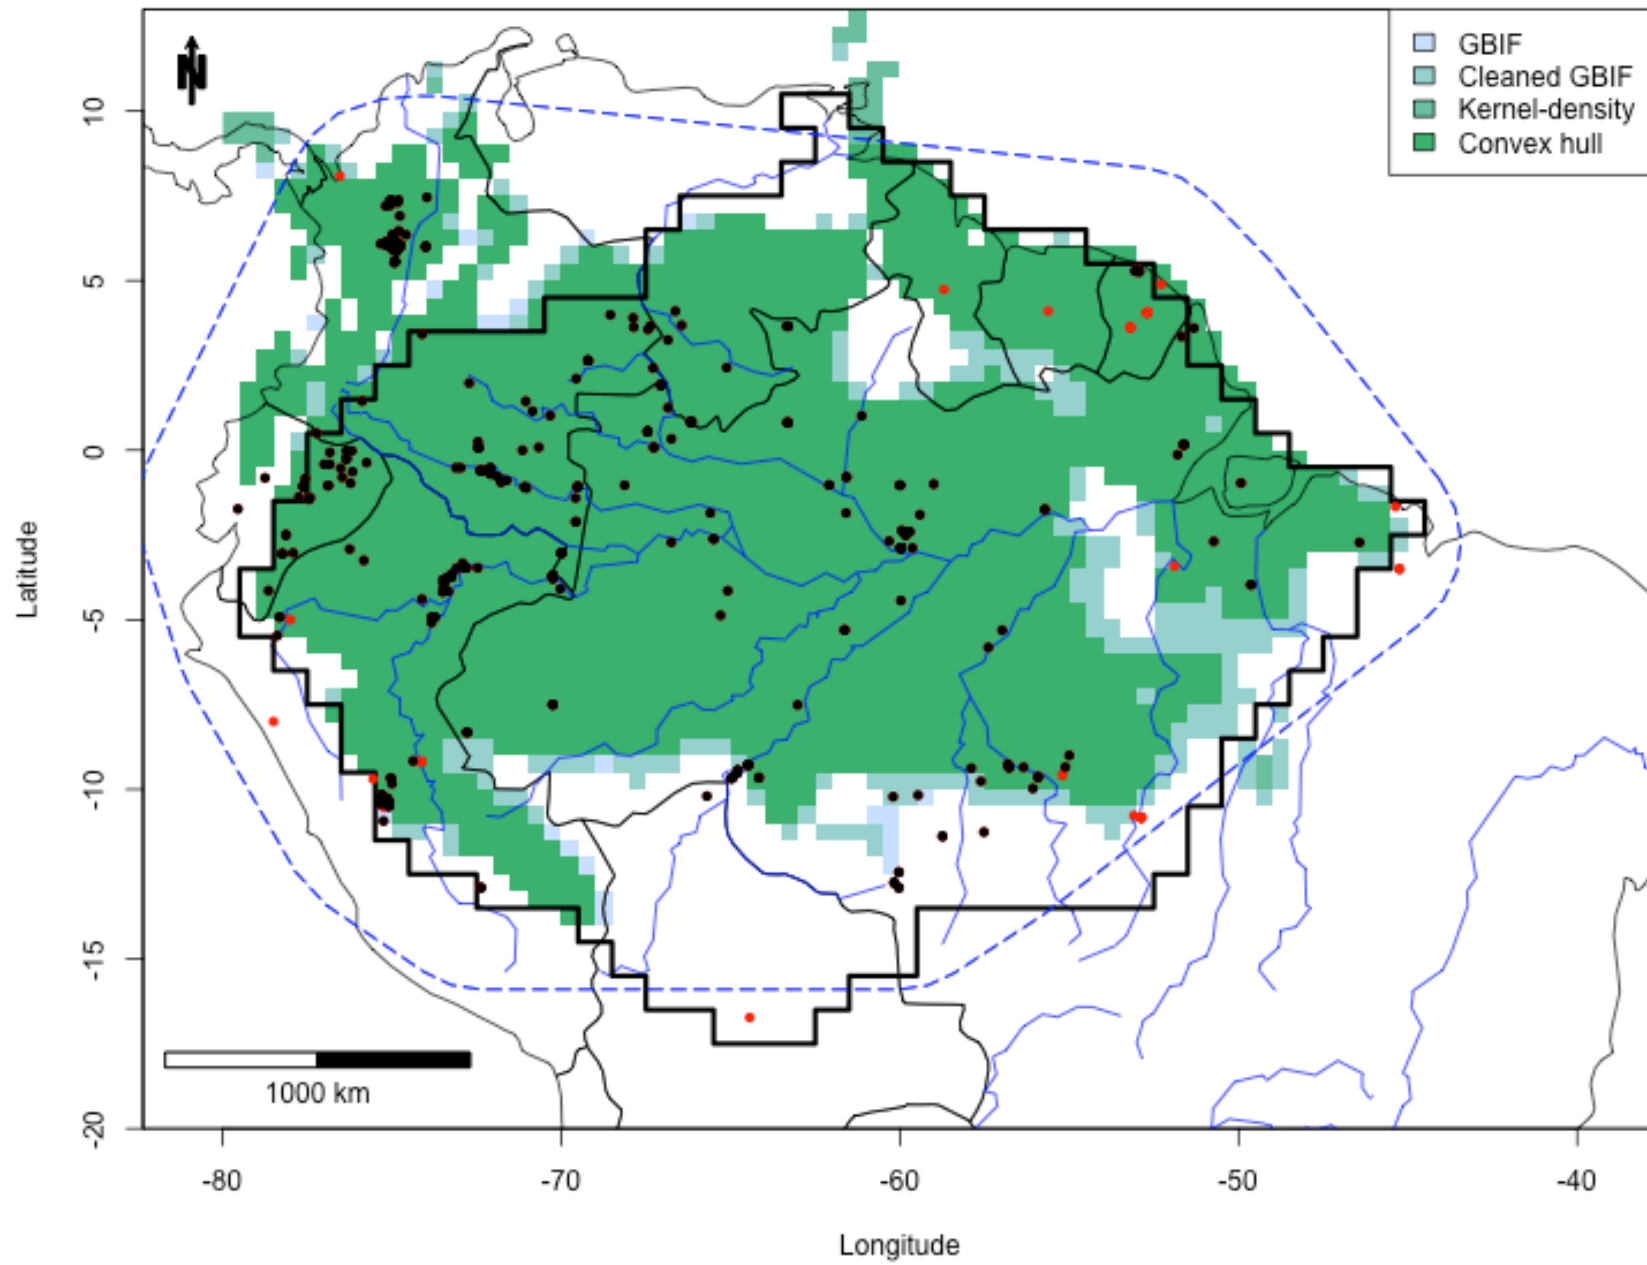

# Catostemma fragrans

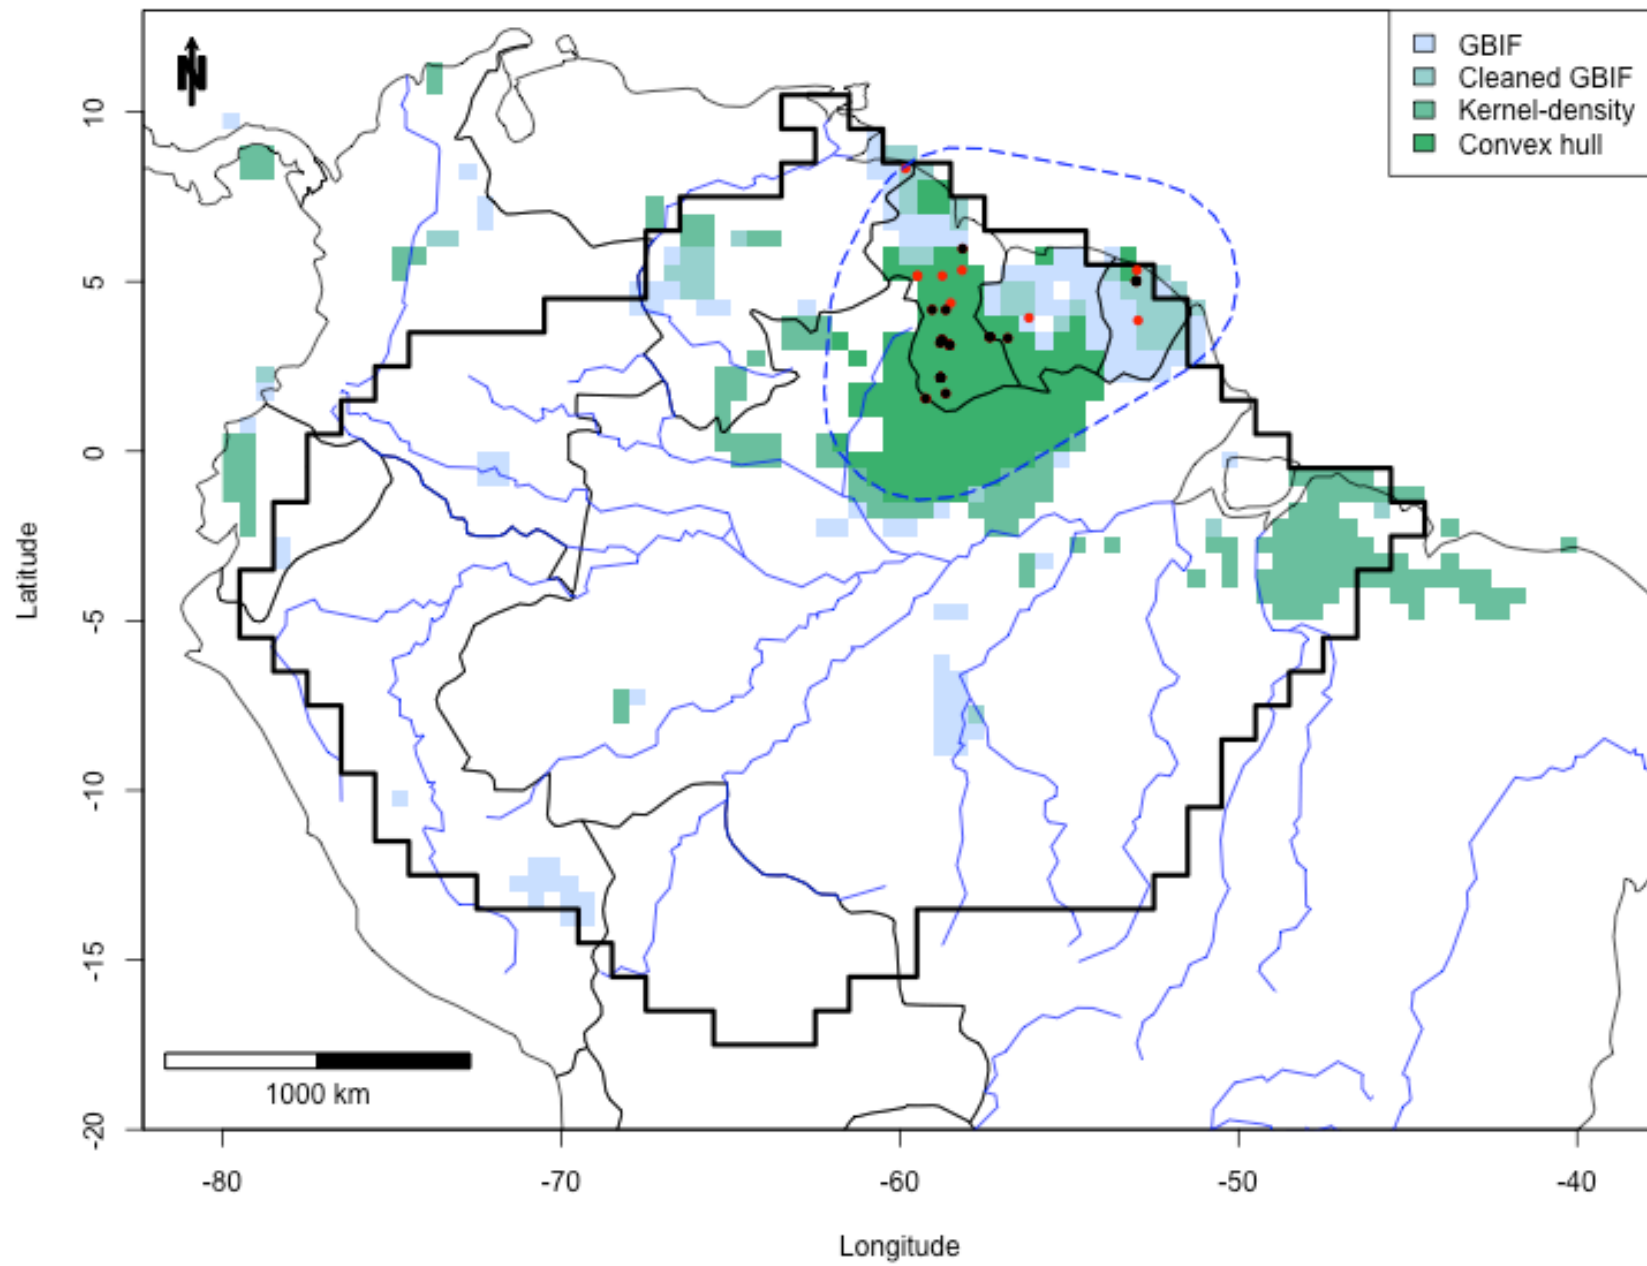

# *Cecropia latiloba*

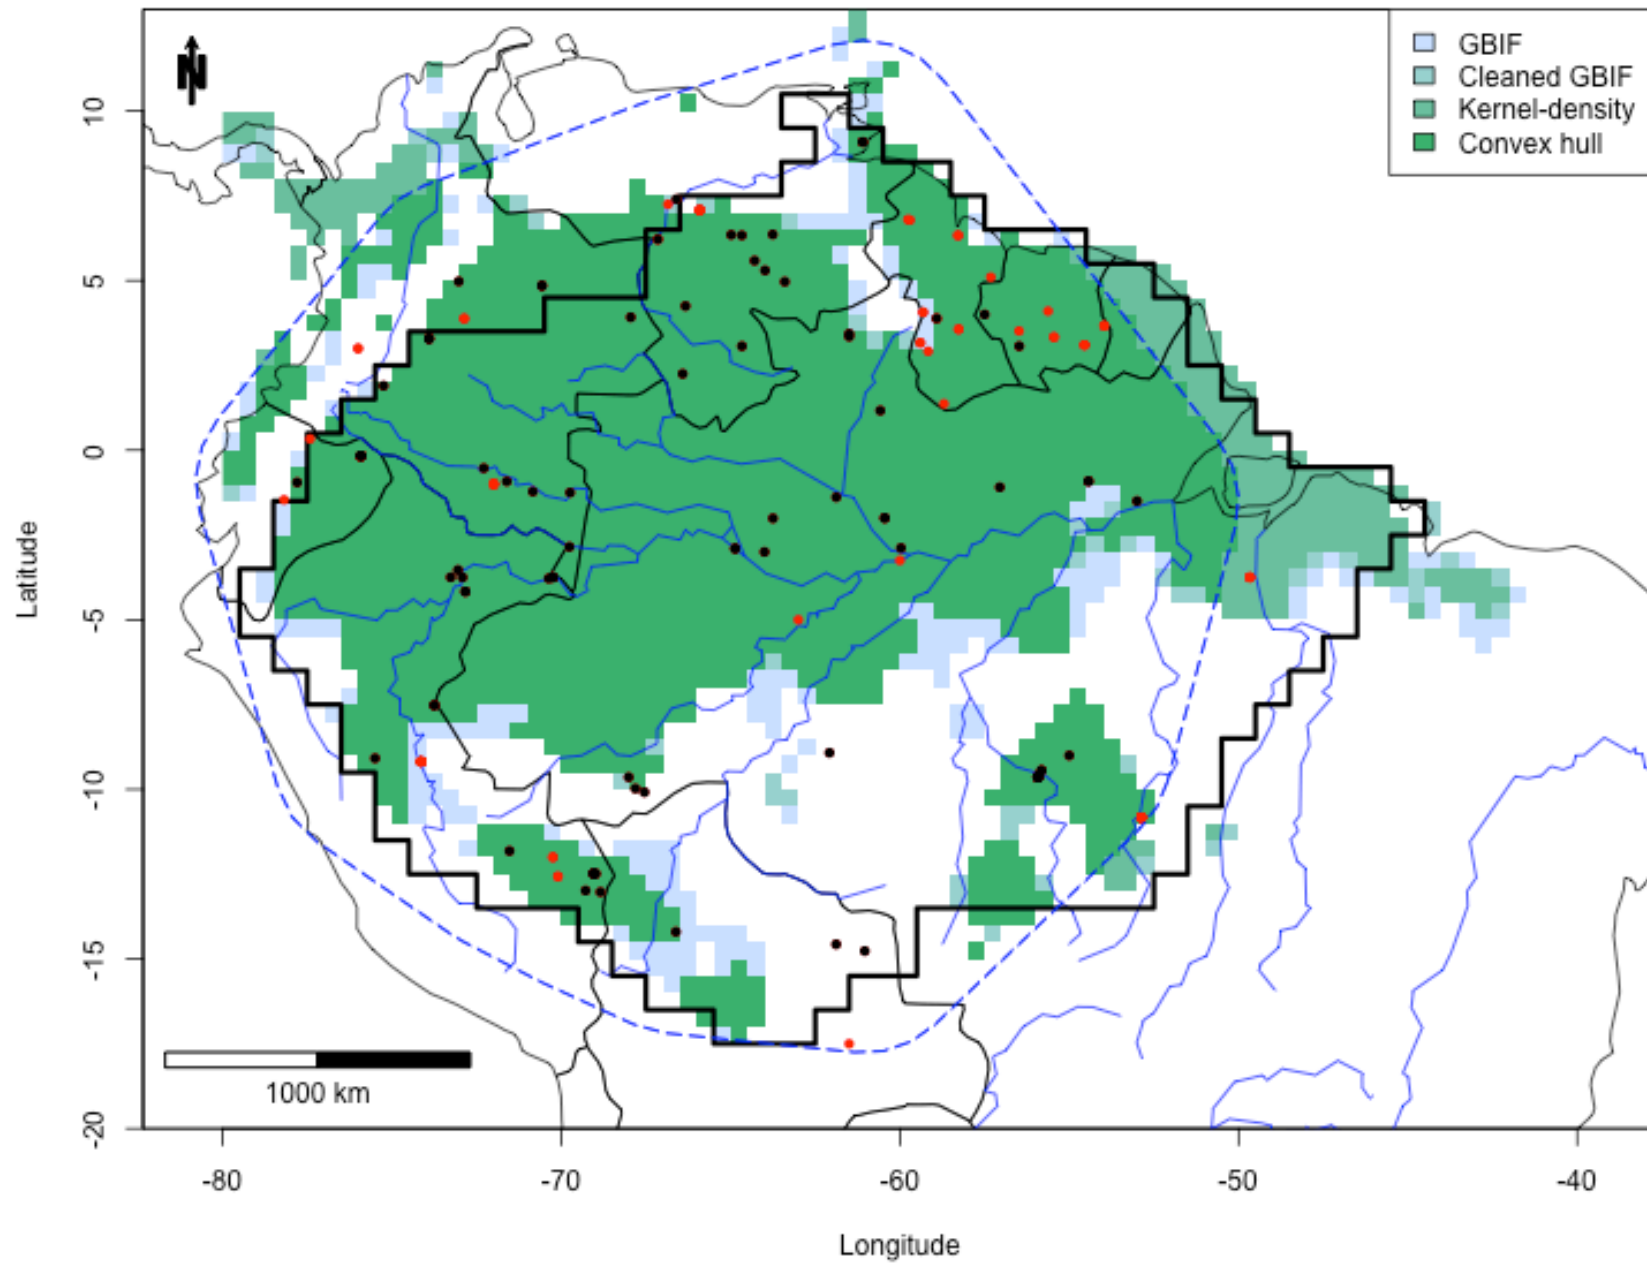

# Cecropia membranacea

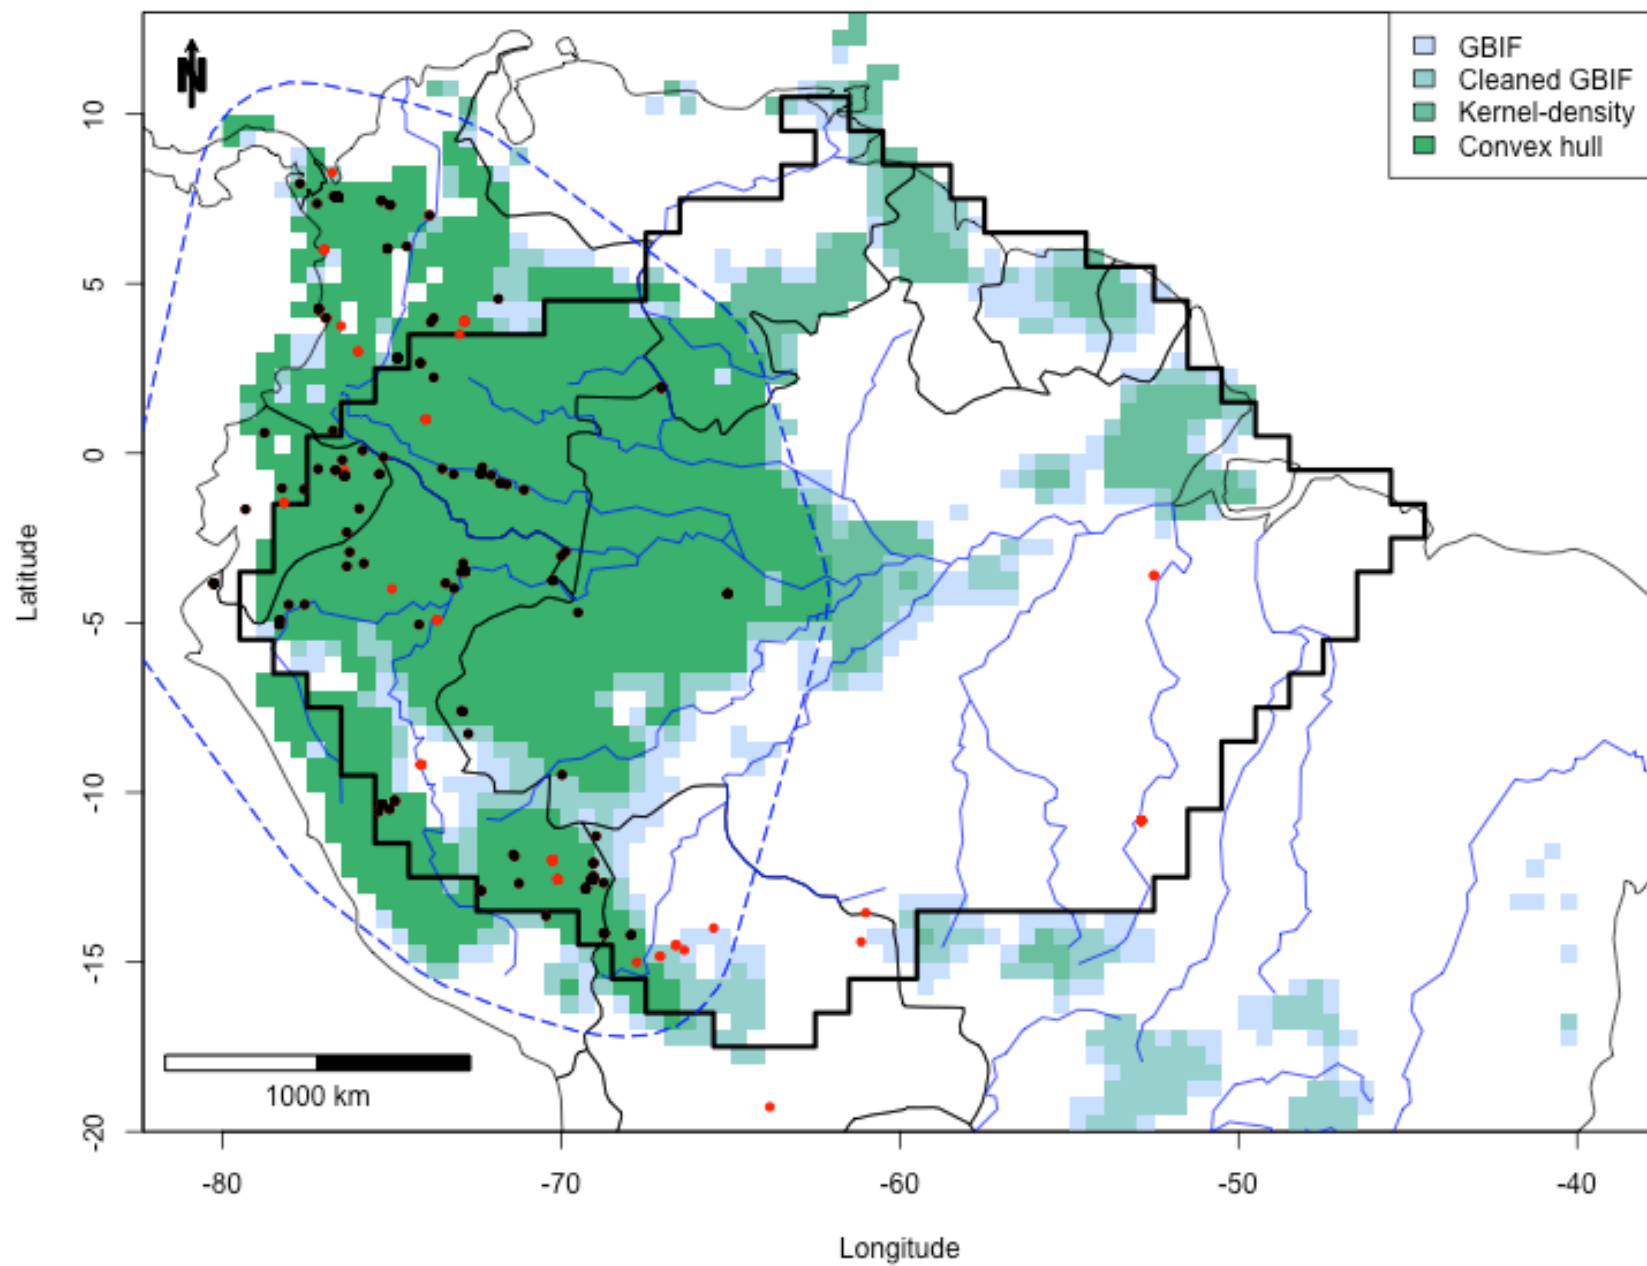

# *Cecropia sciadophylla*

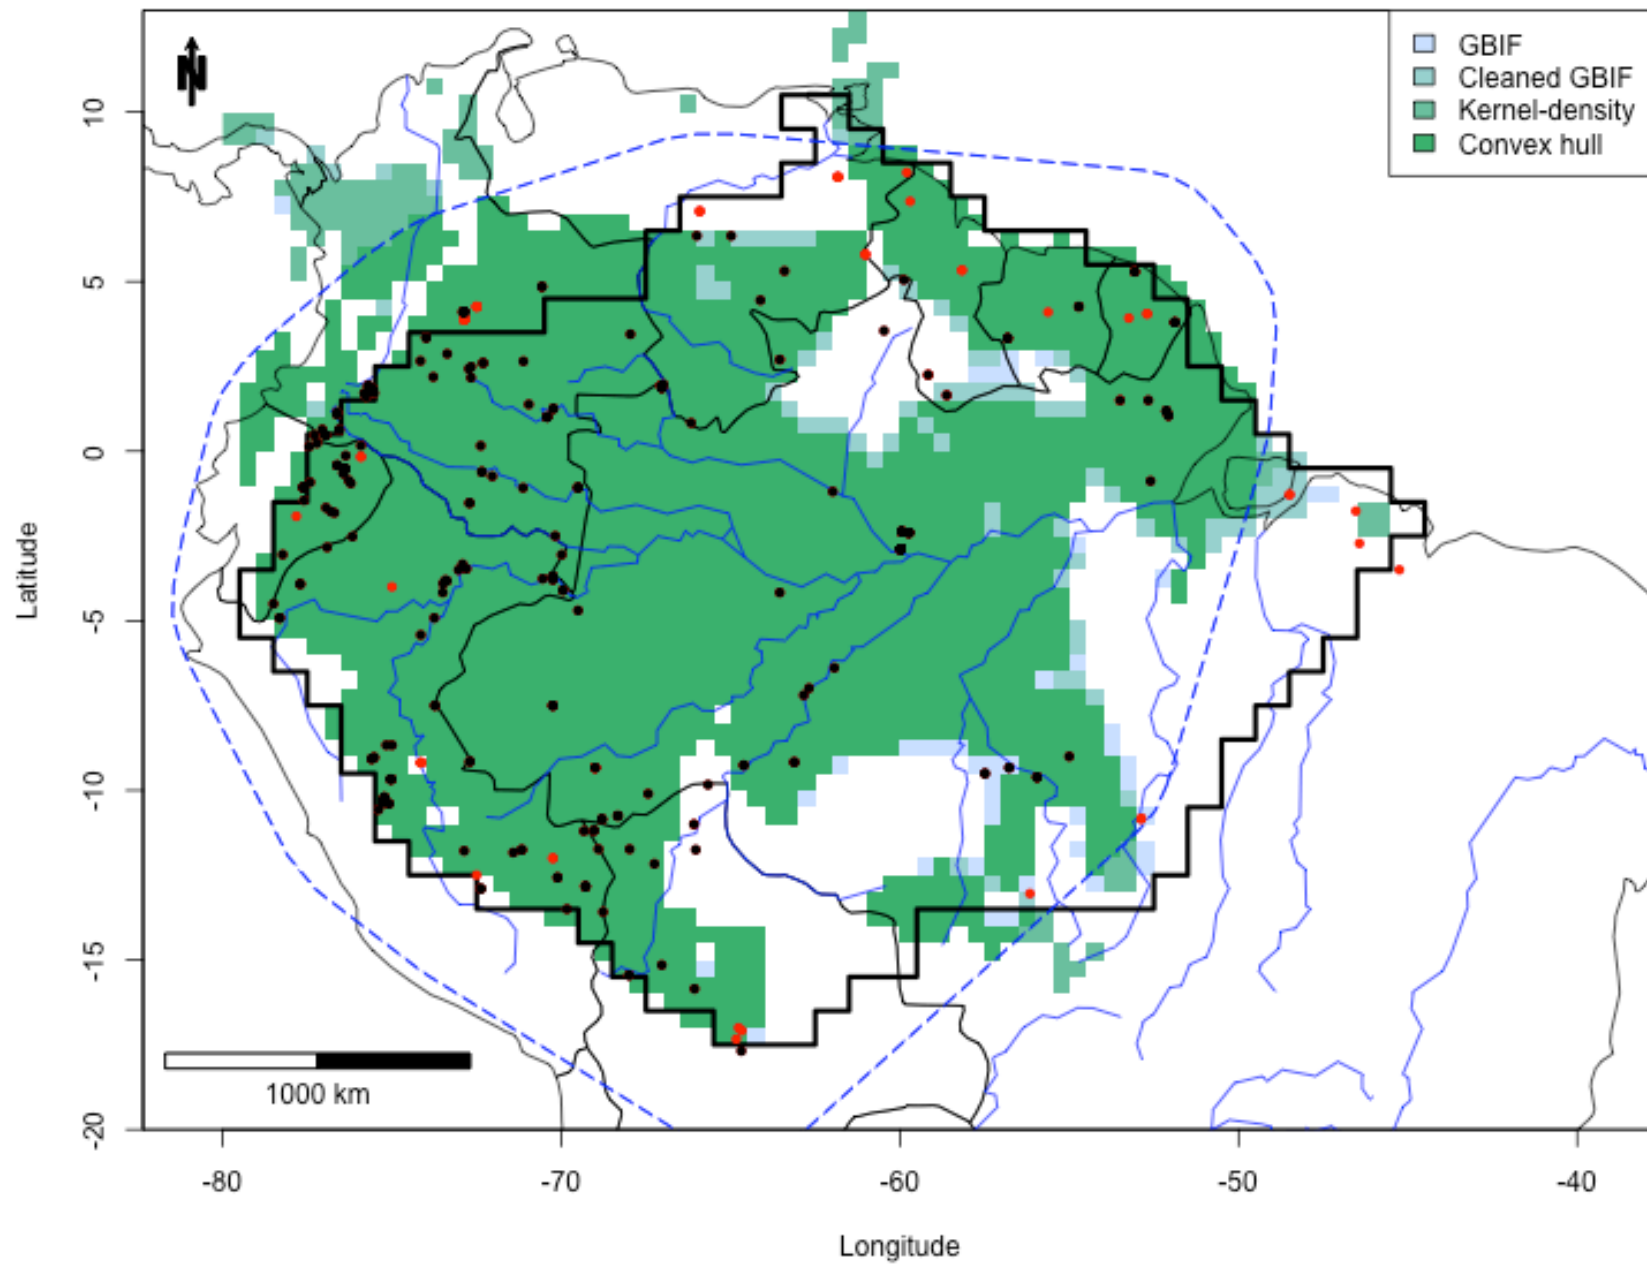

# Cedrelinga cateniformis

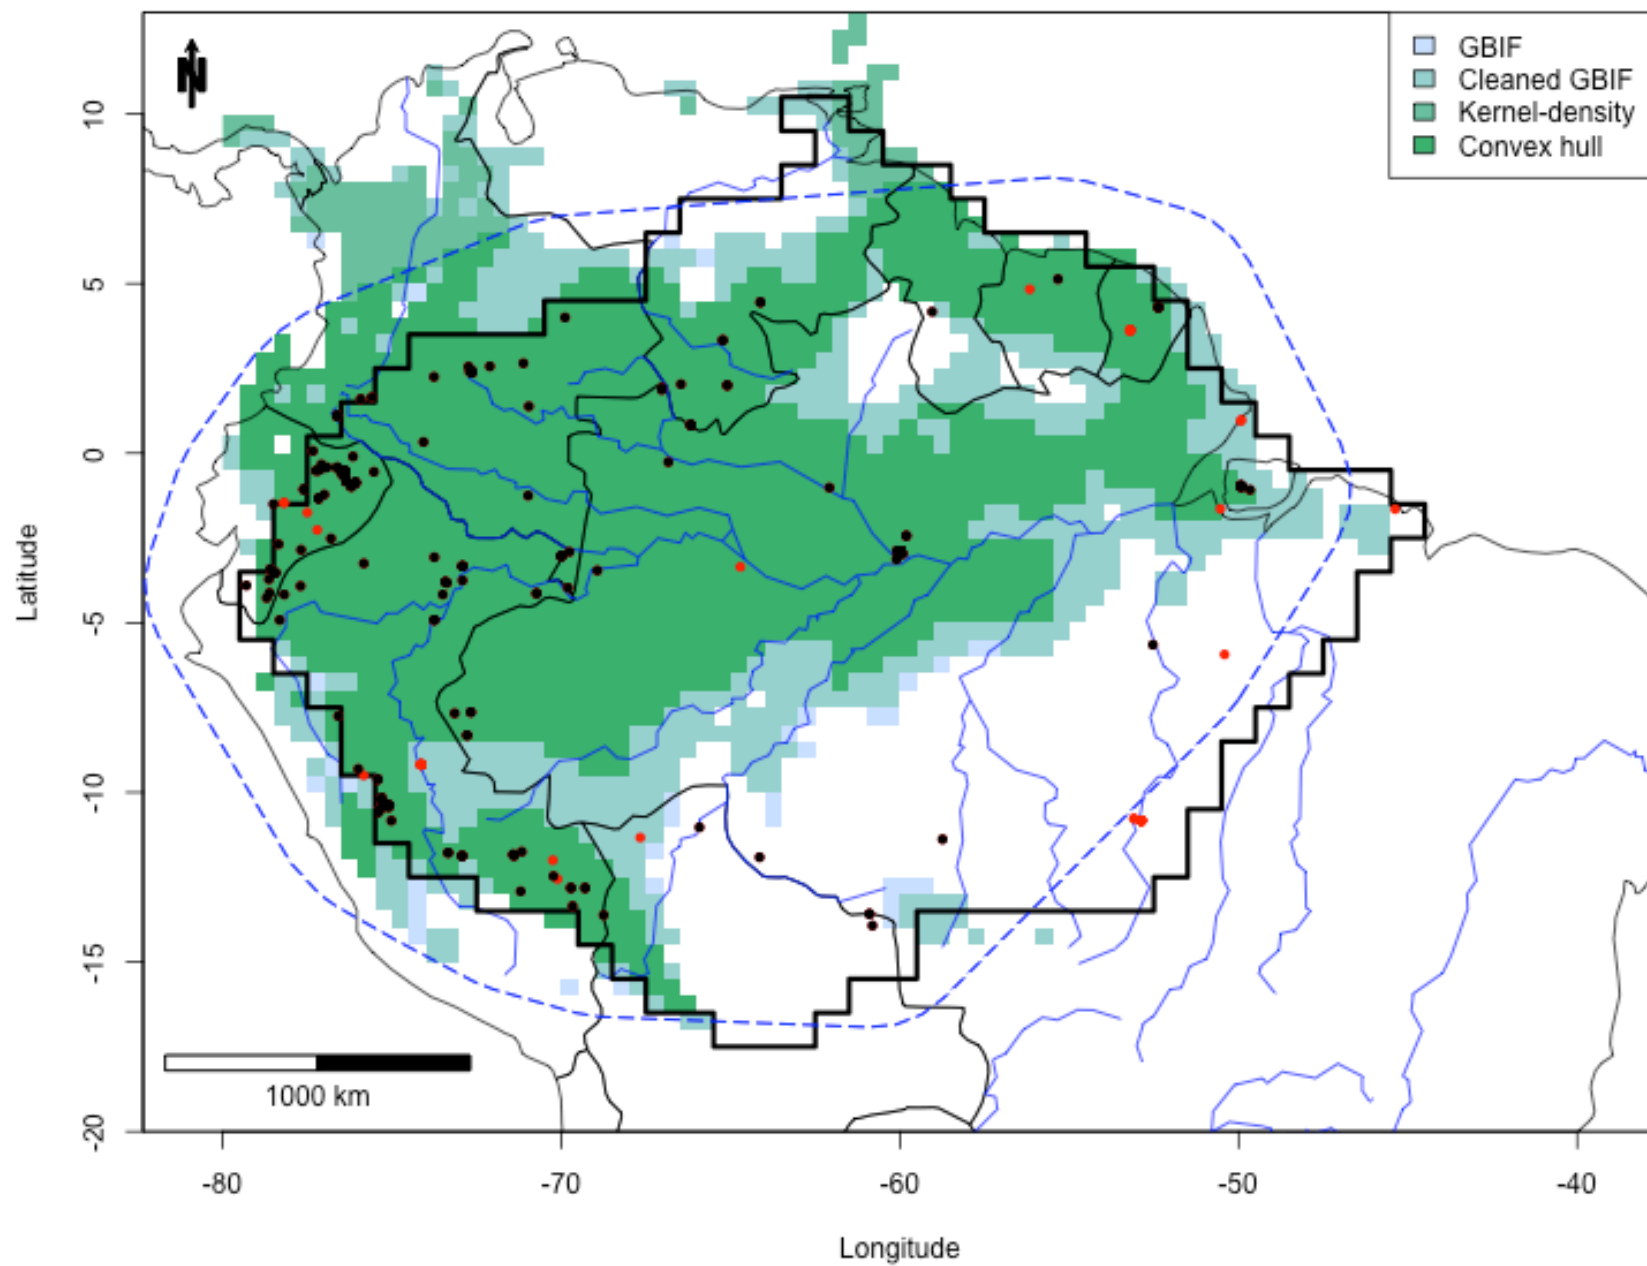



# *Celtis schippii*

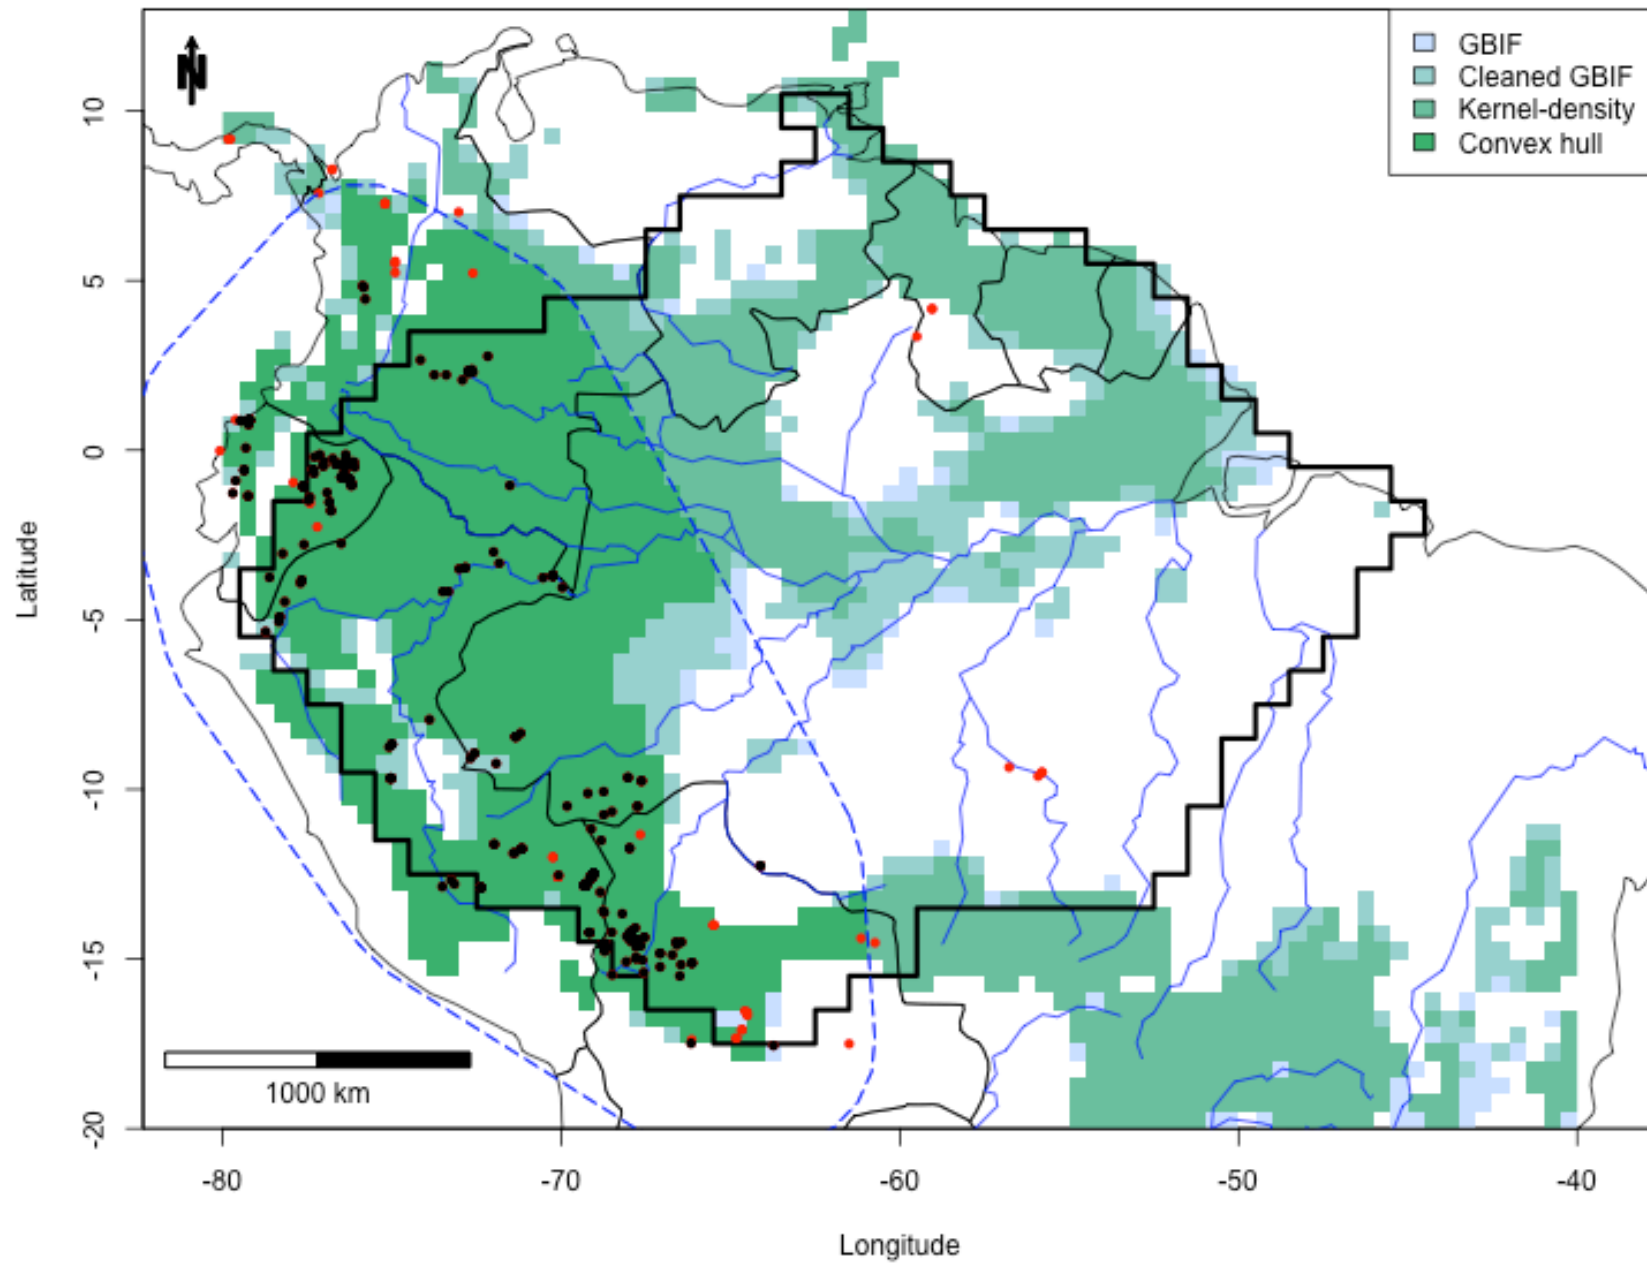



### Cenostigma tocantinum

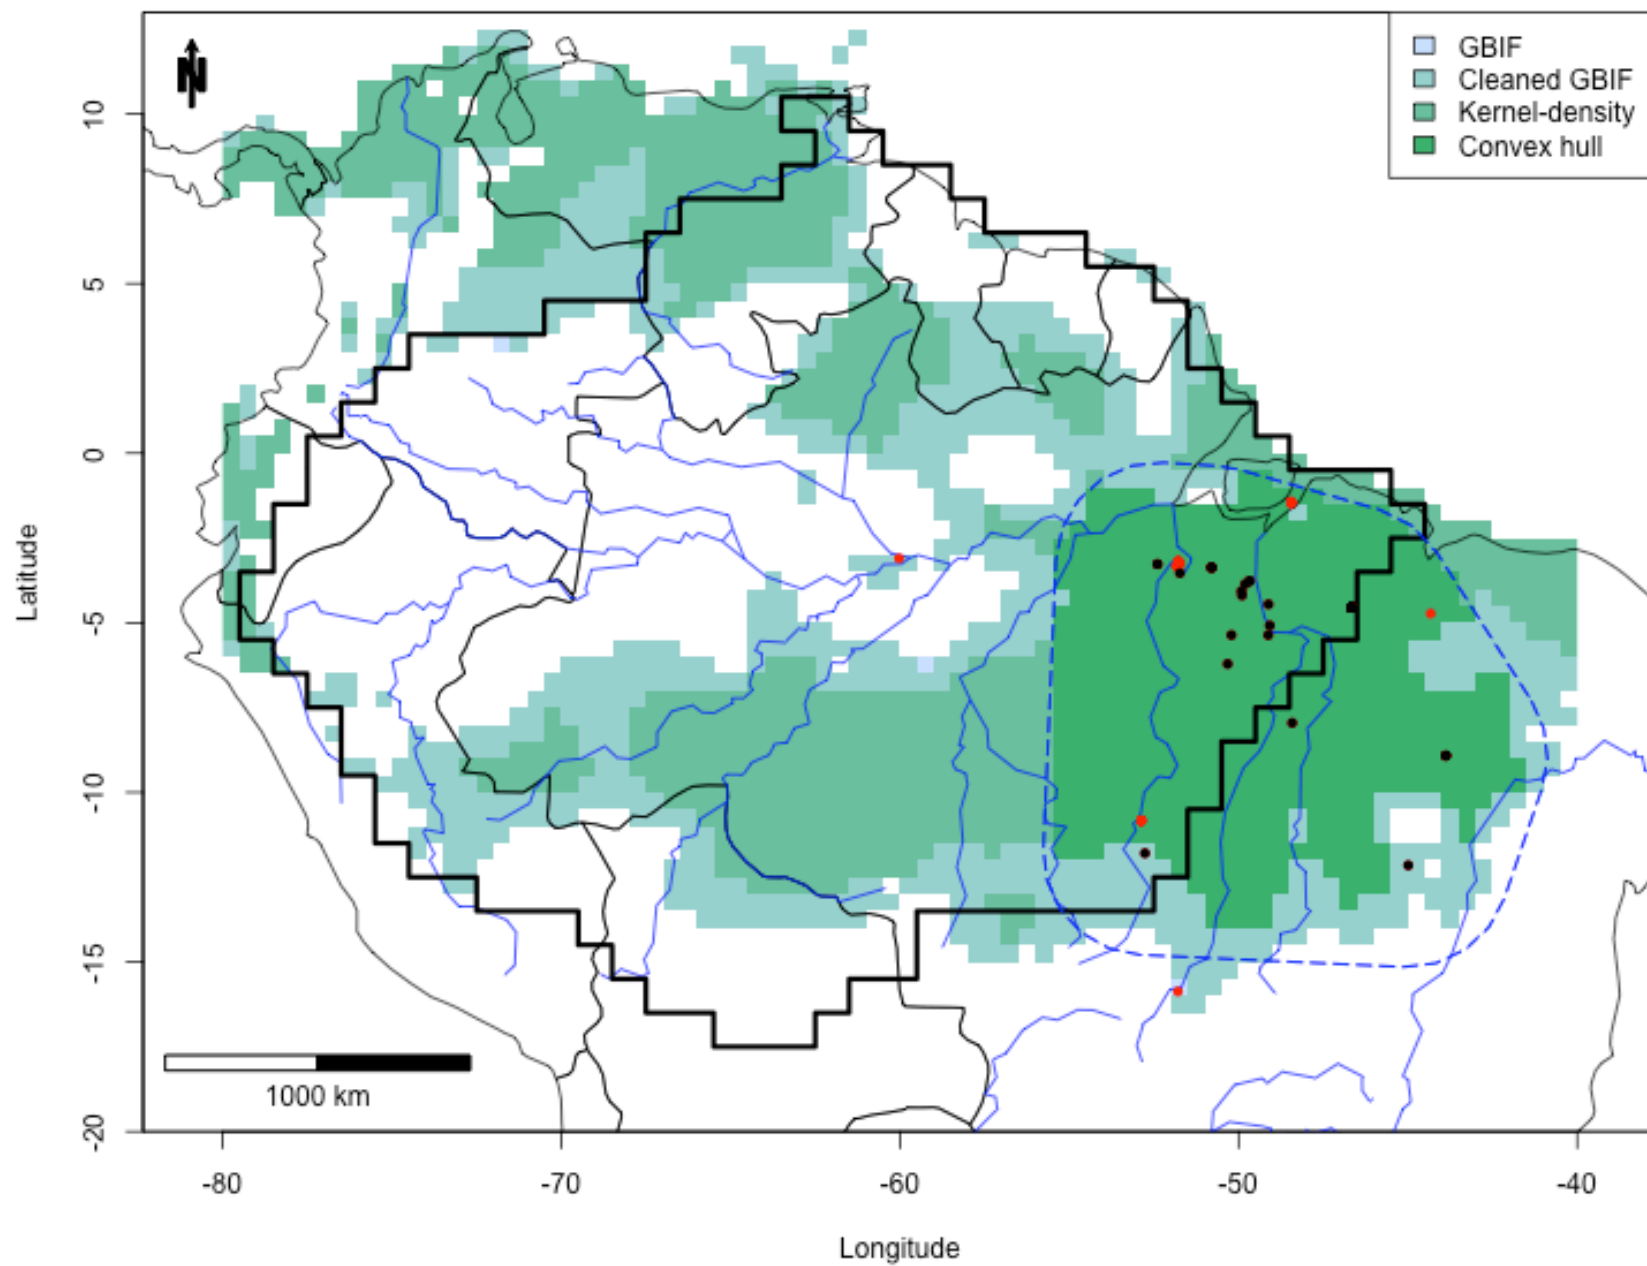

# Cheiloclinium cognatum

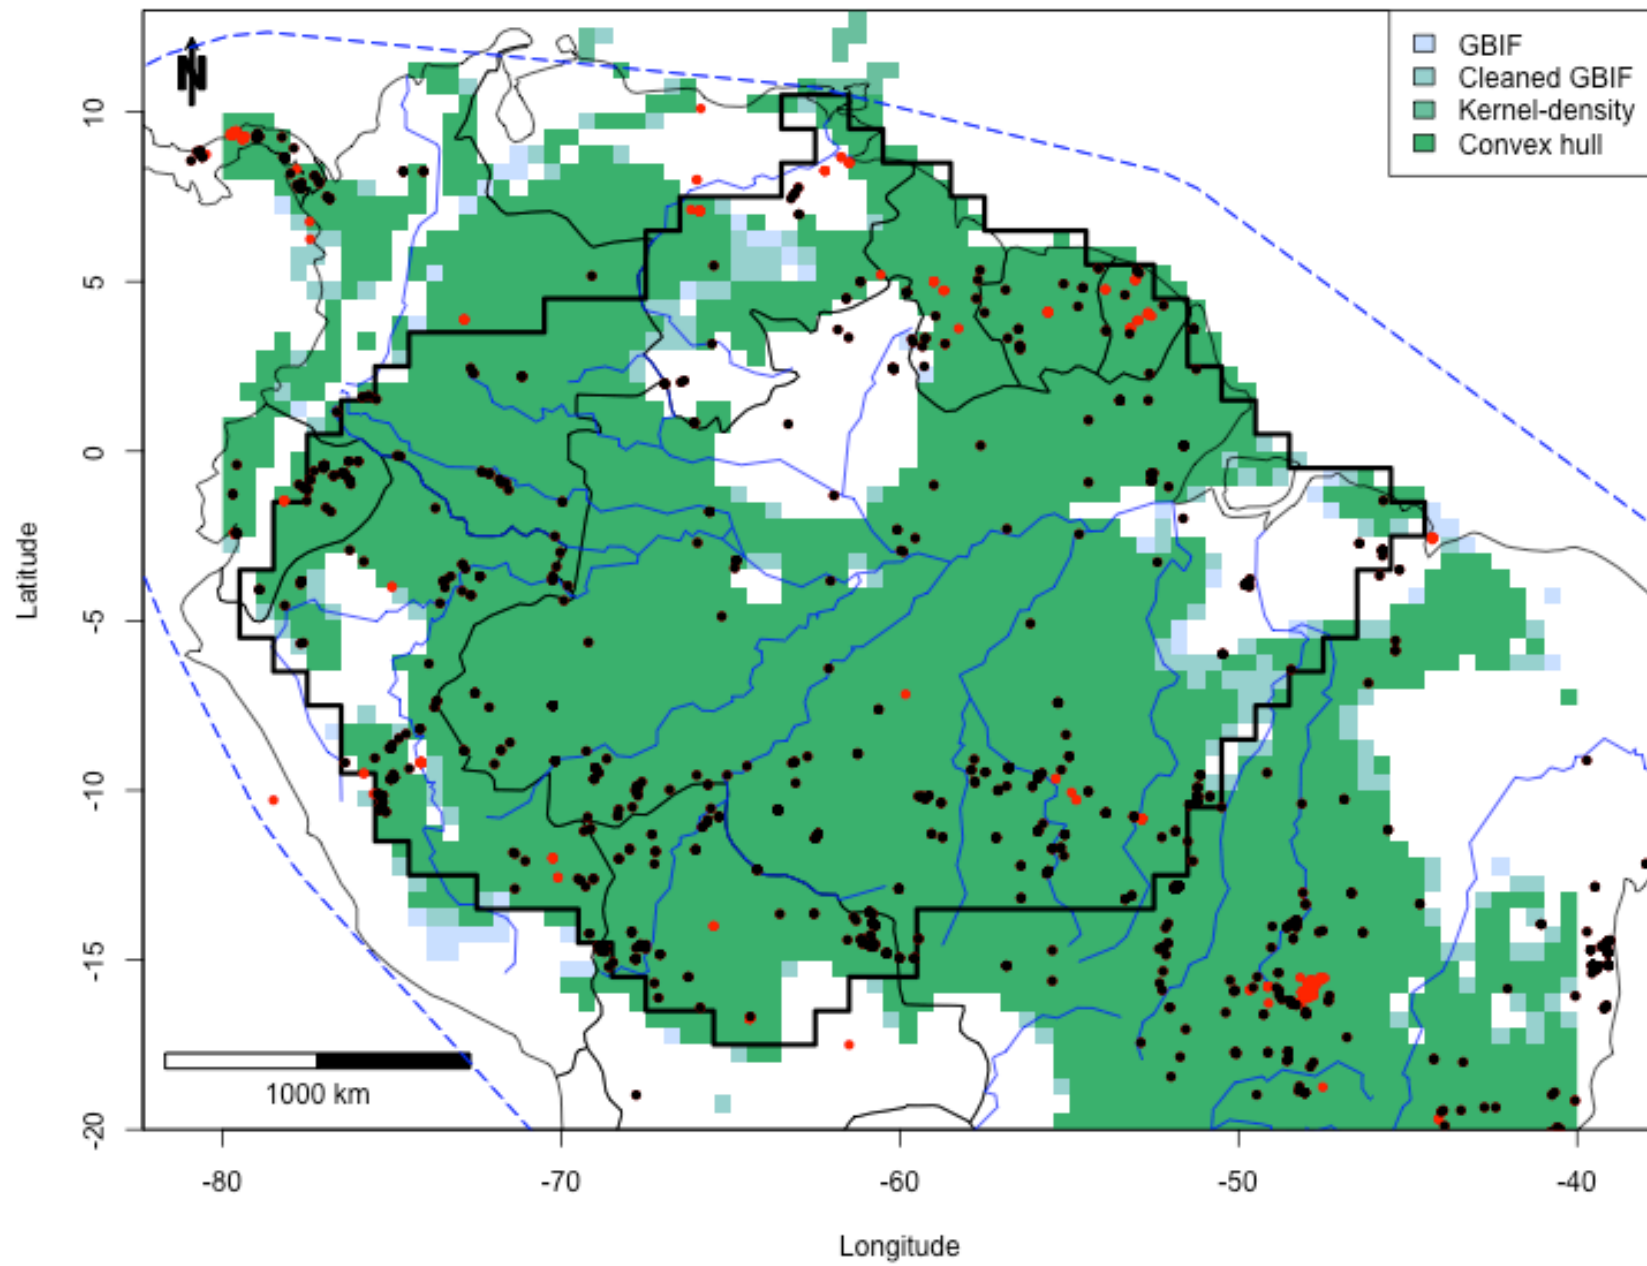

# Chlorocardium rodiei

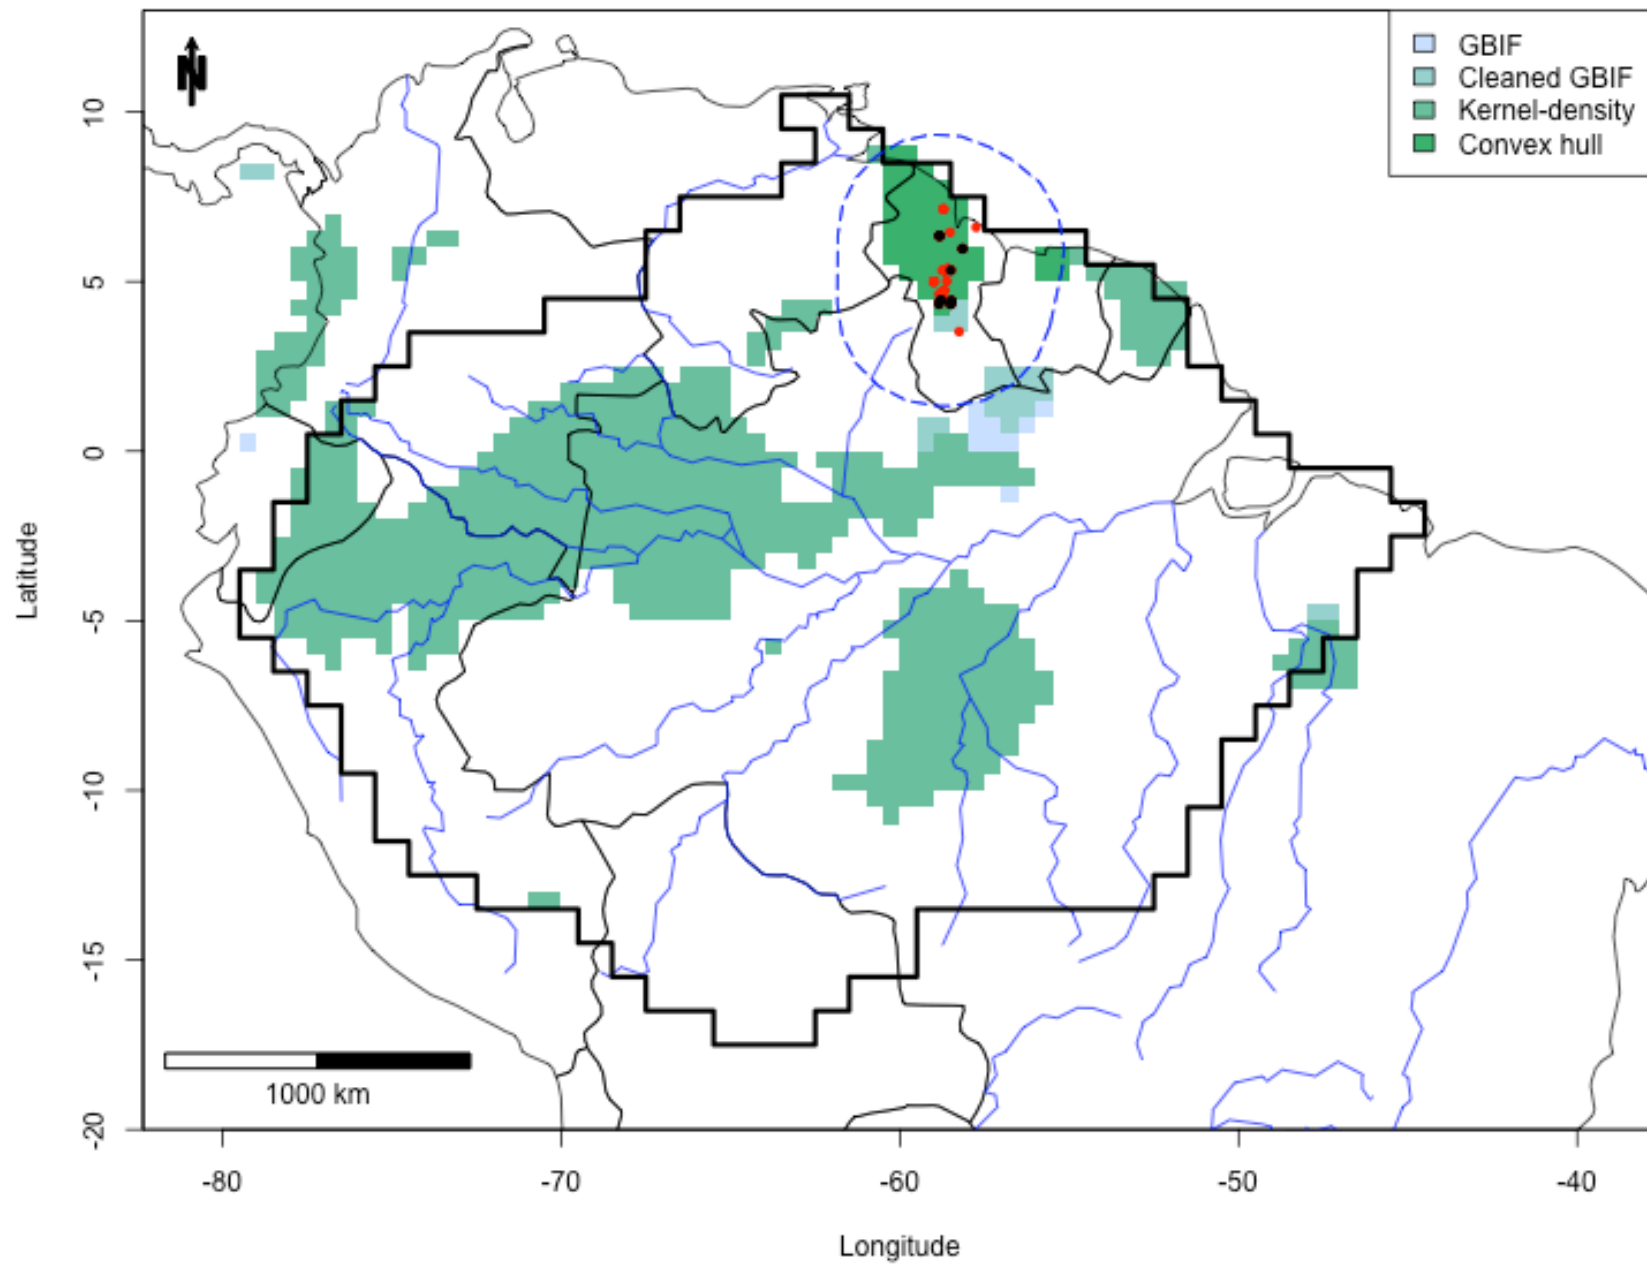

*Chrysophyllum sanguinolentum*

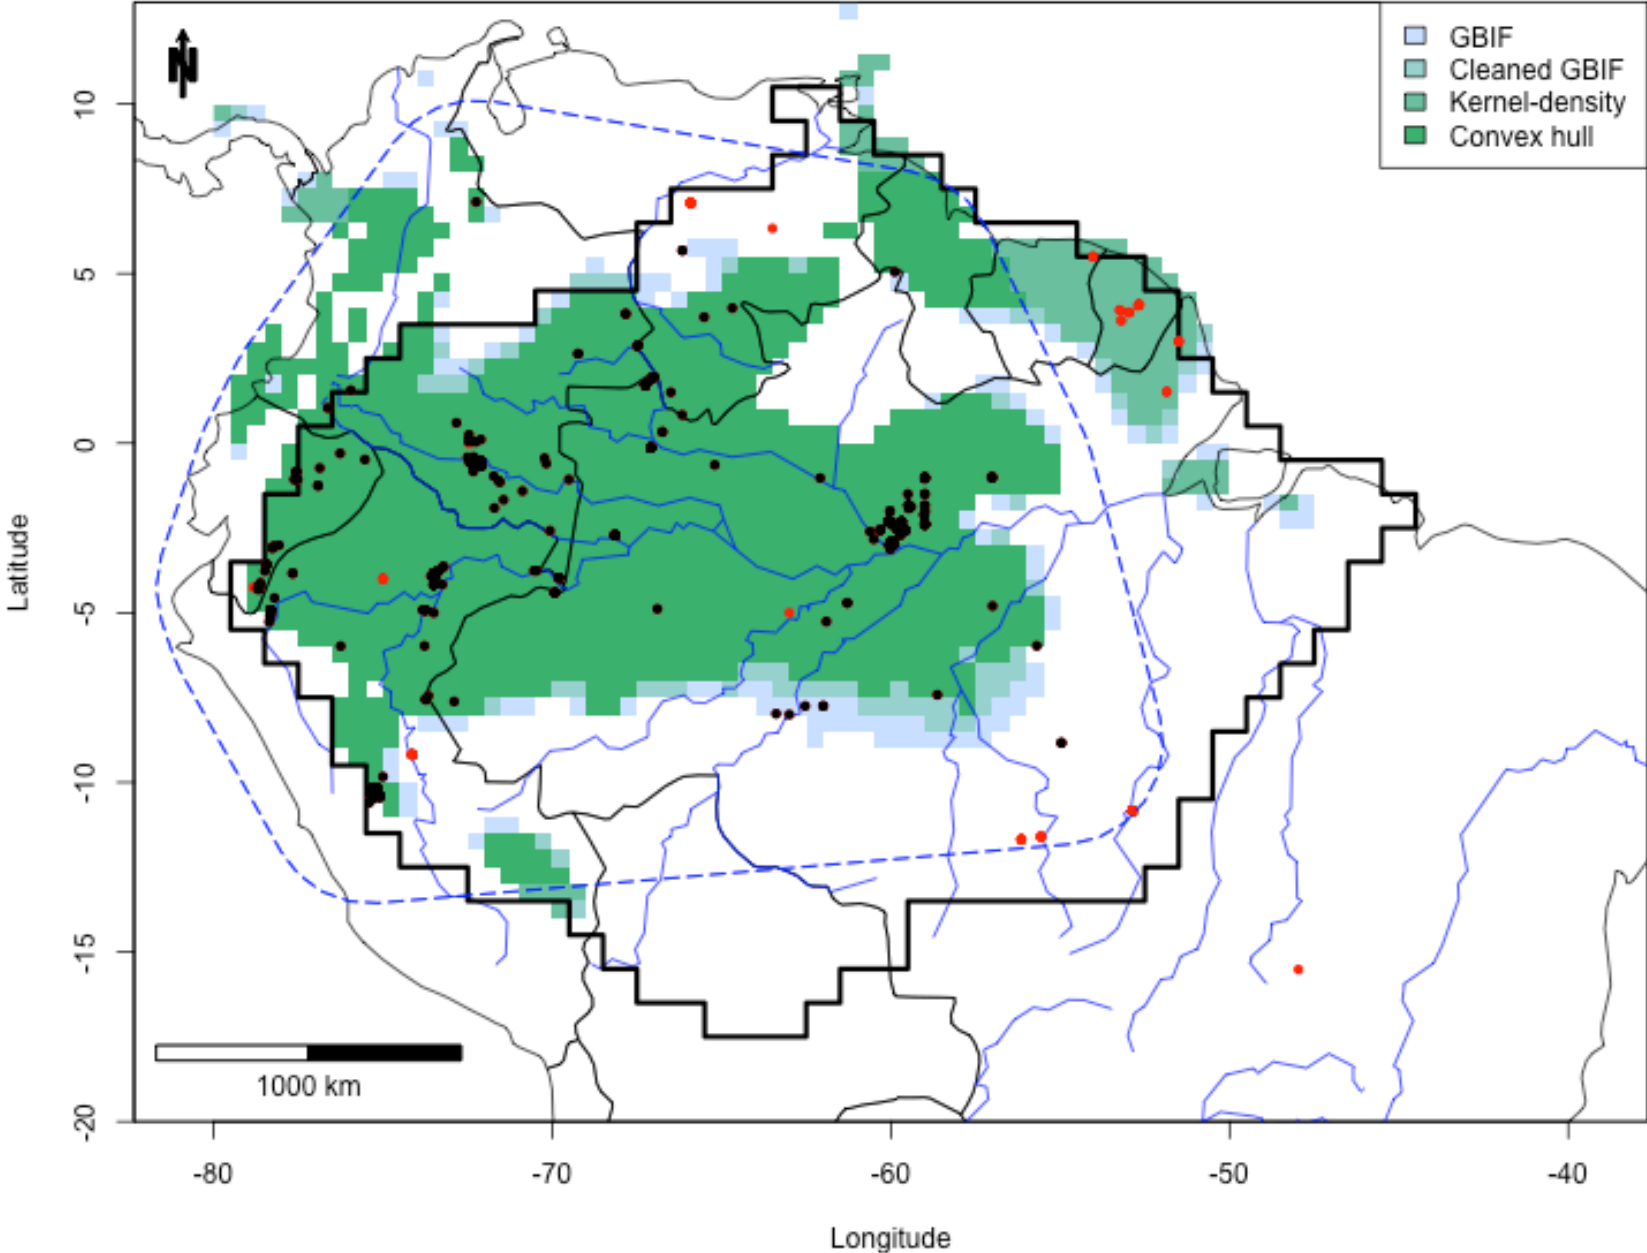

# Clarisia racemosa

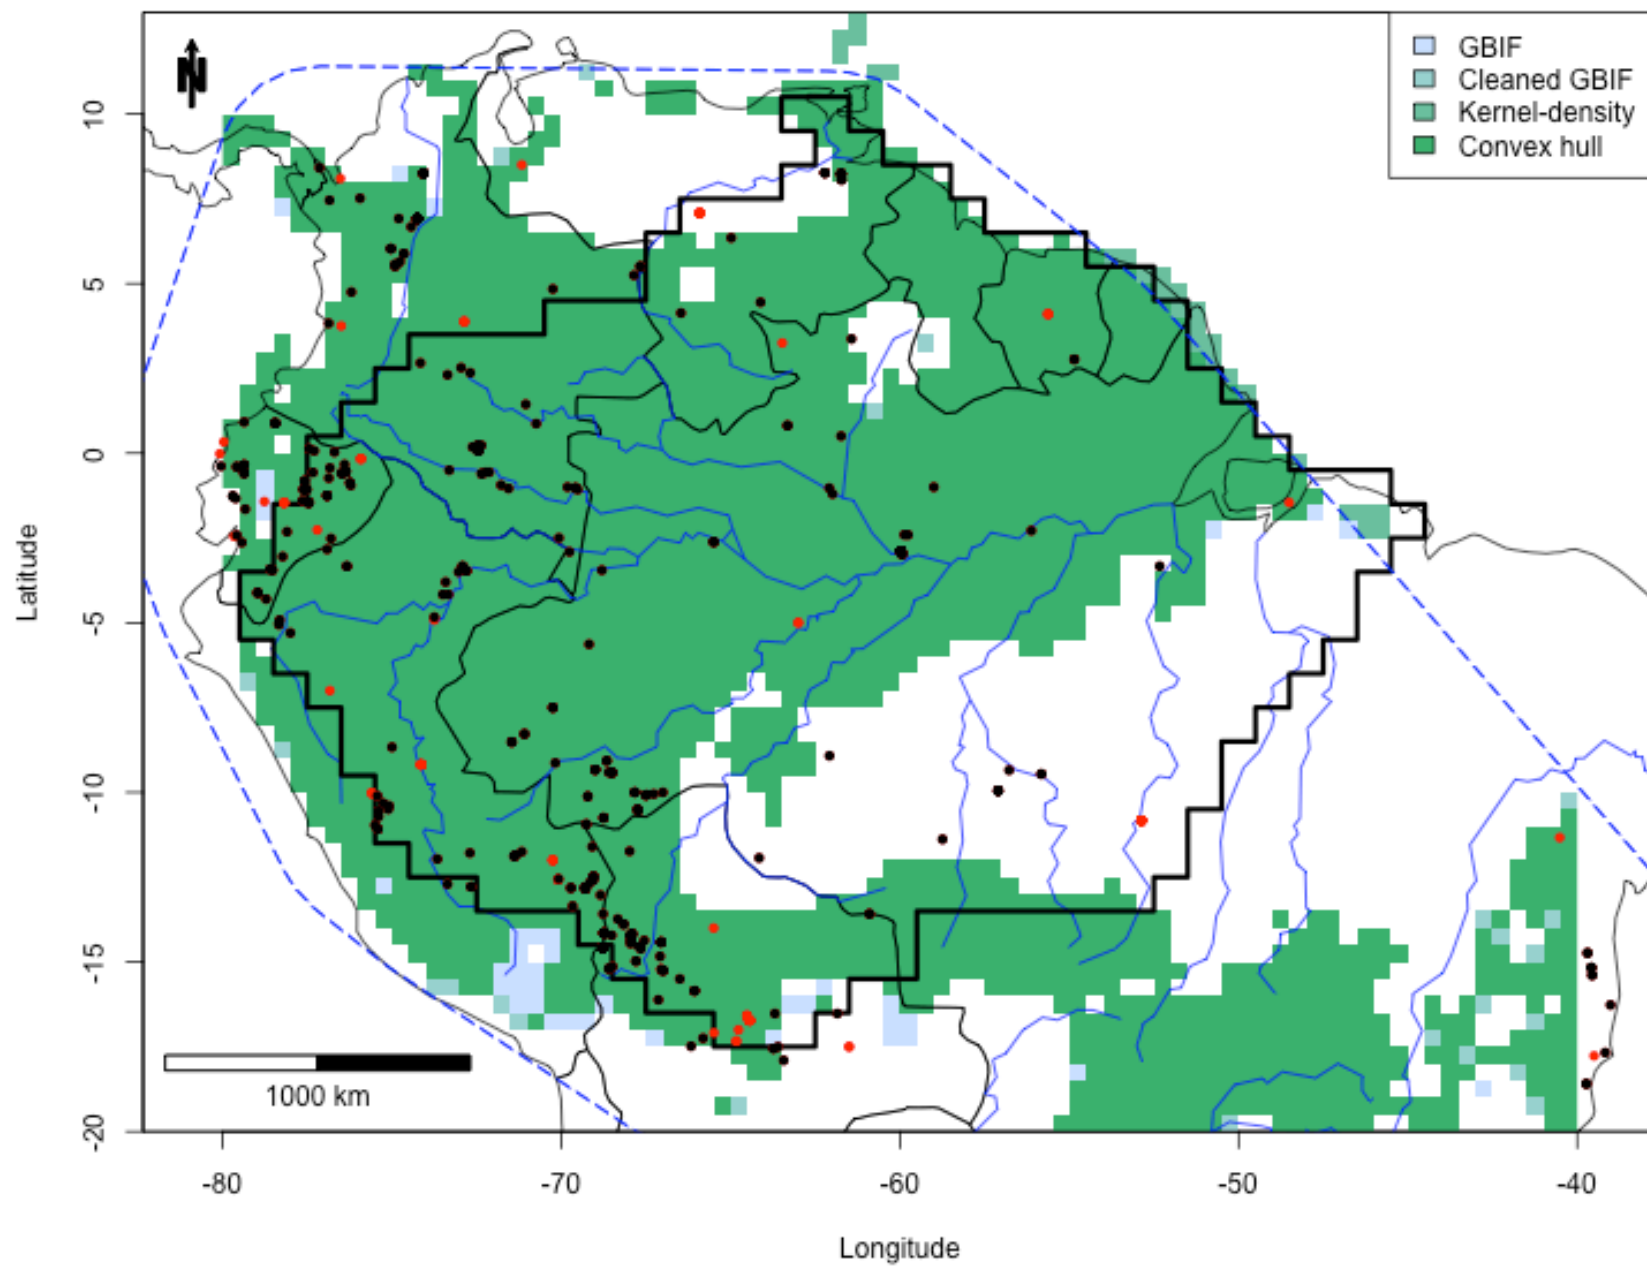

# Clathrotropis glaucophylla

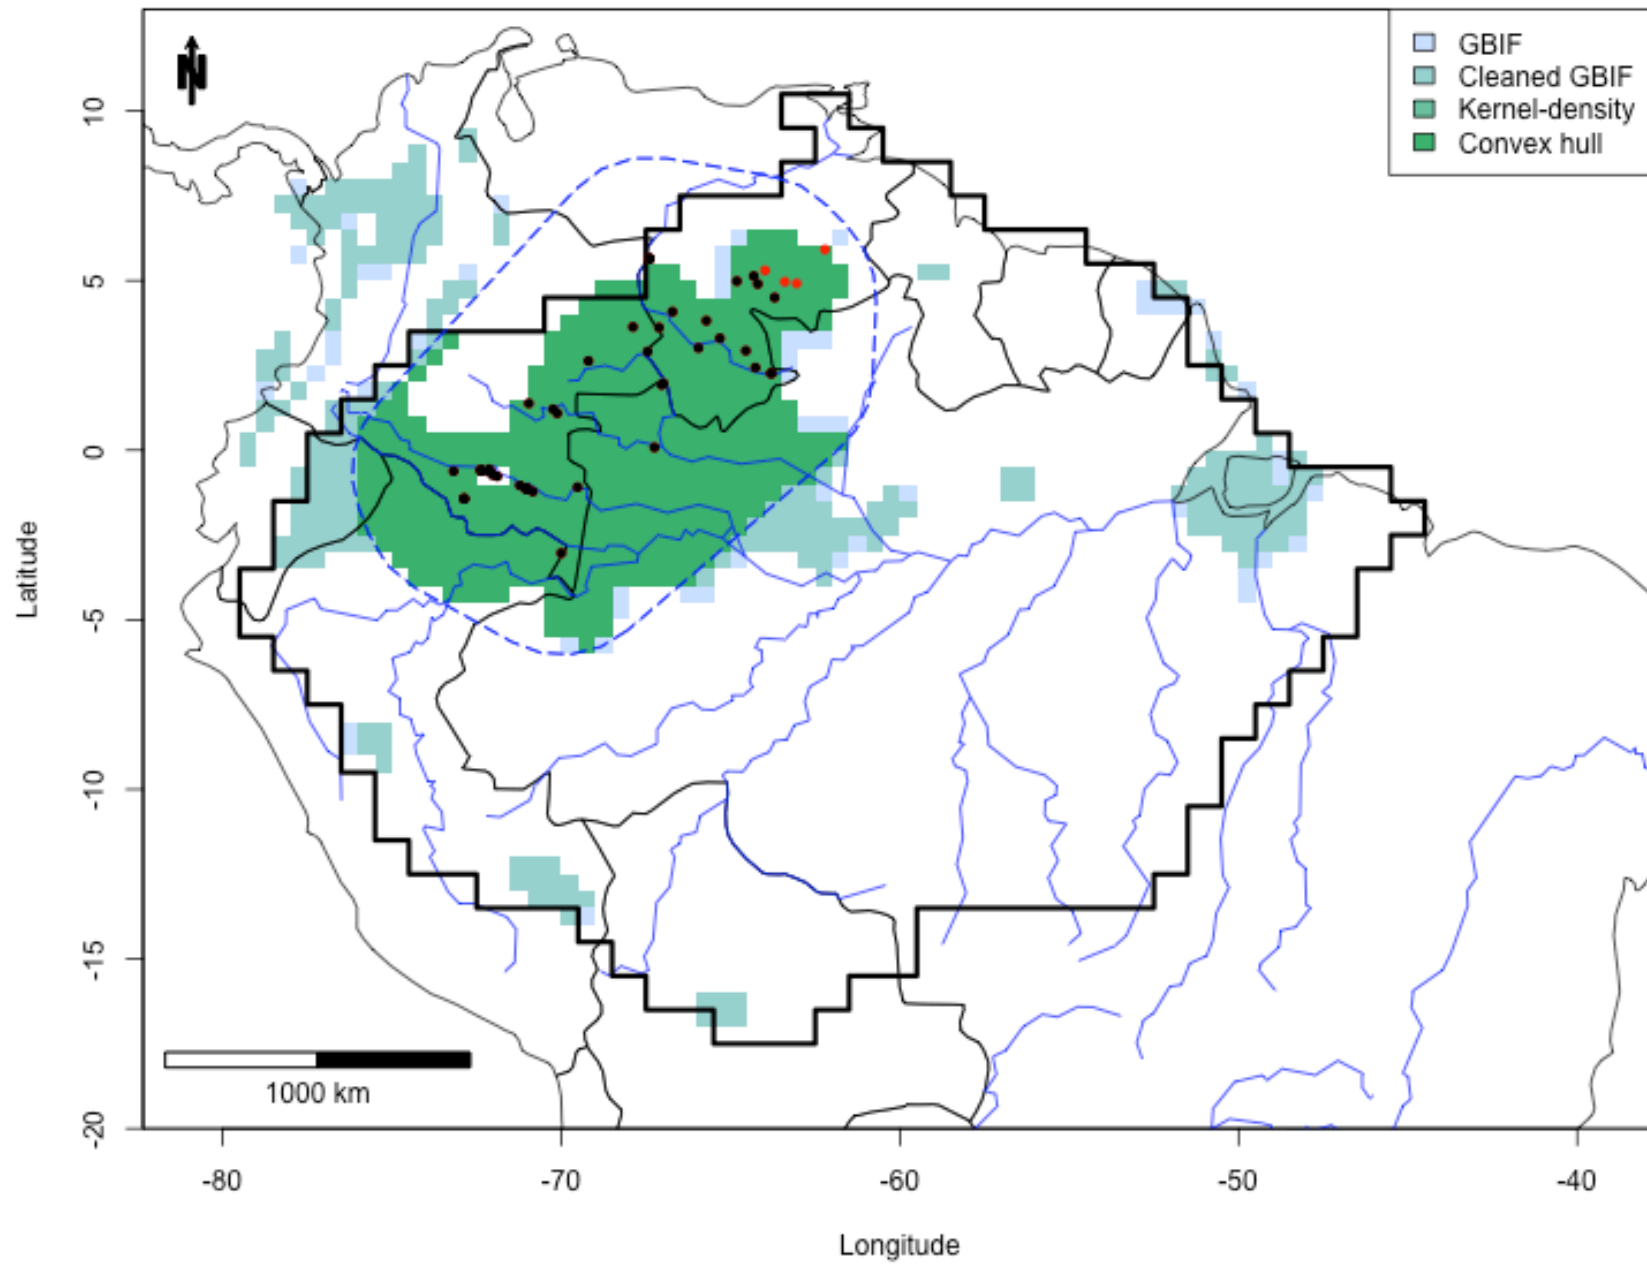

# Clathrotropis macrocarpa

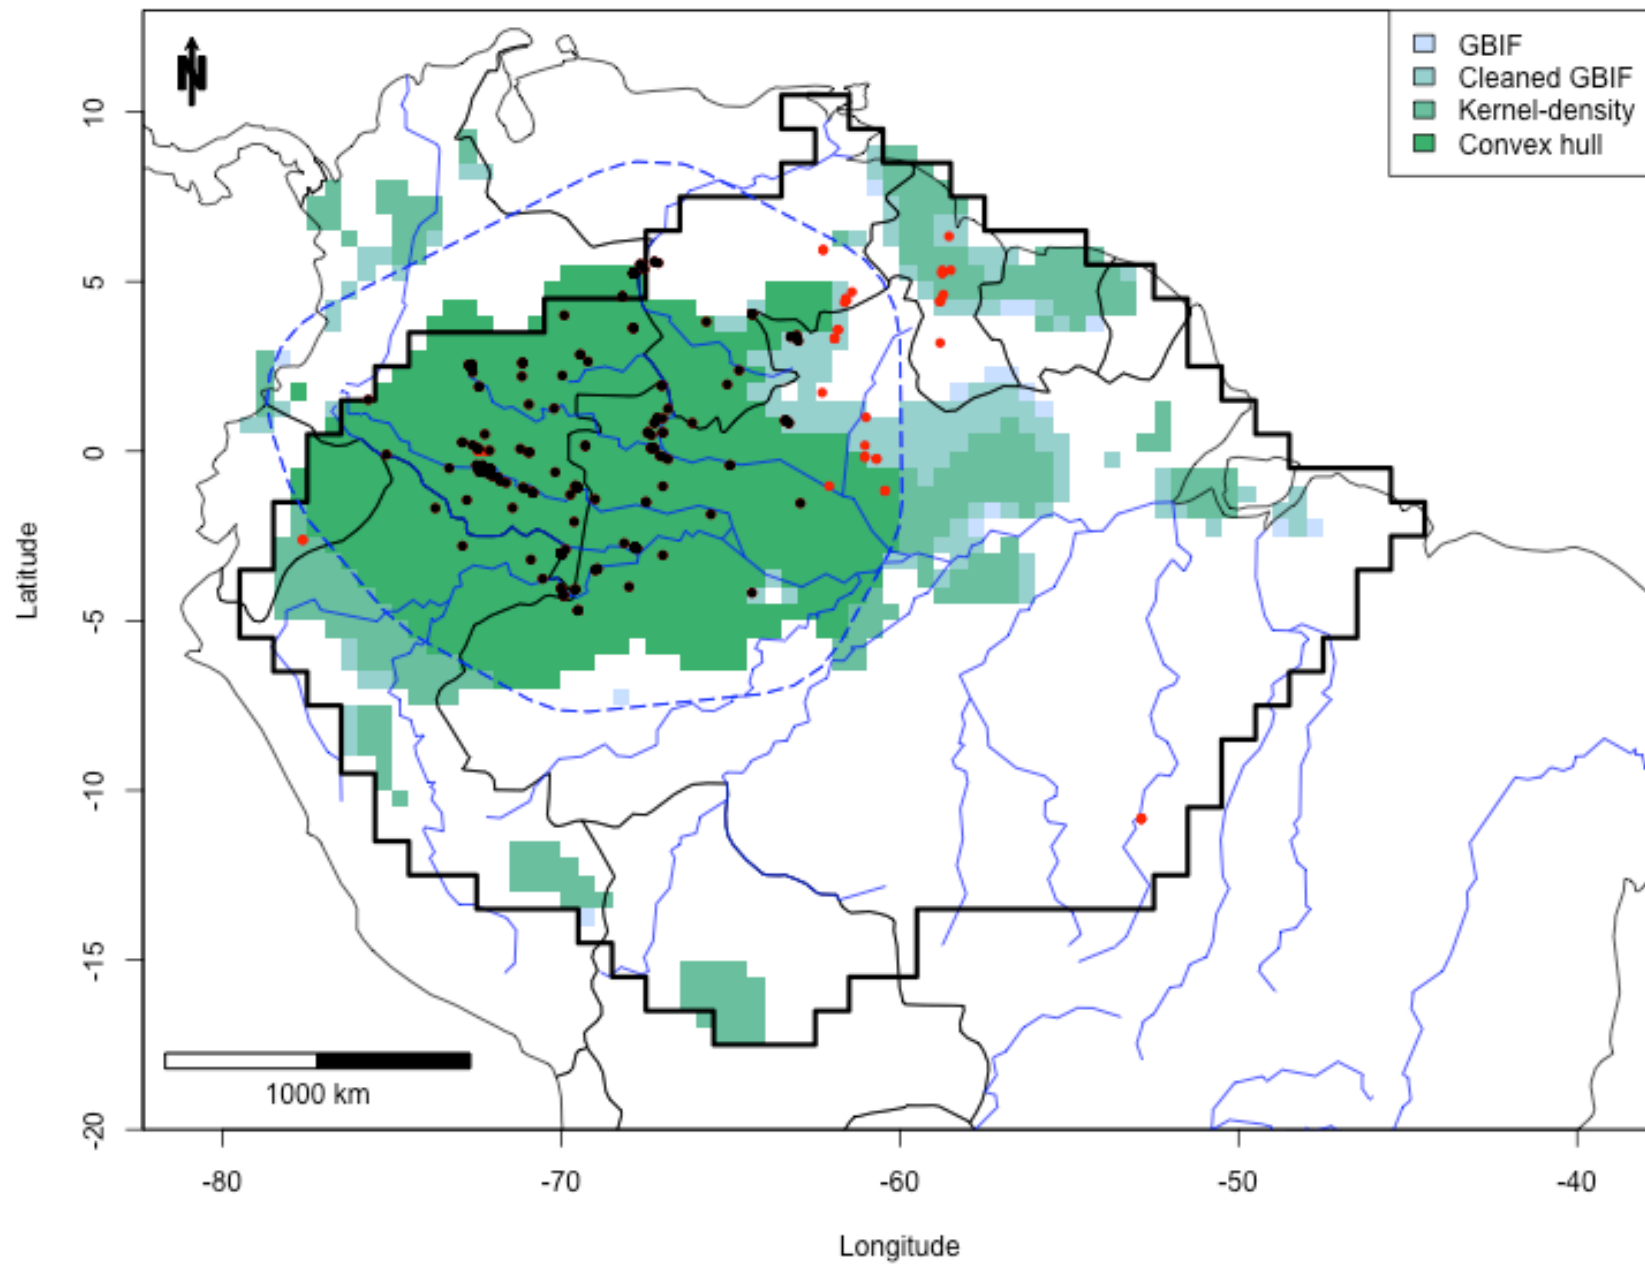

*Conceveiba guianensis*

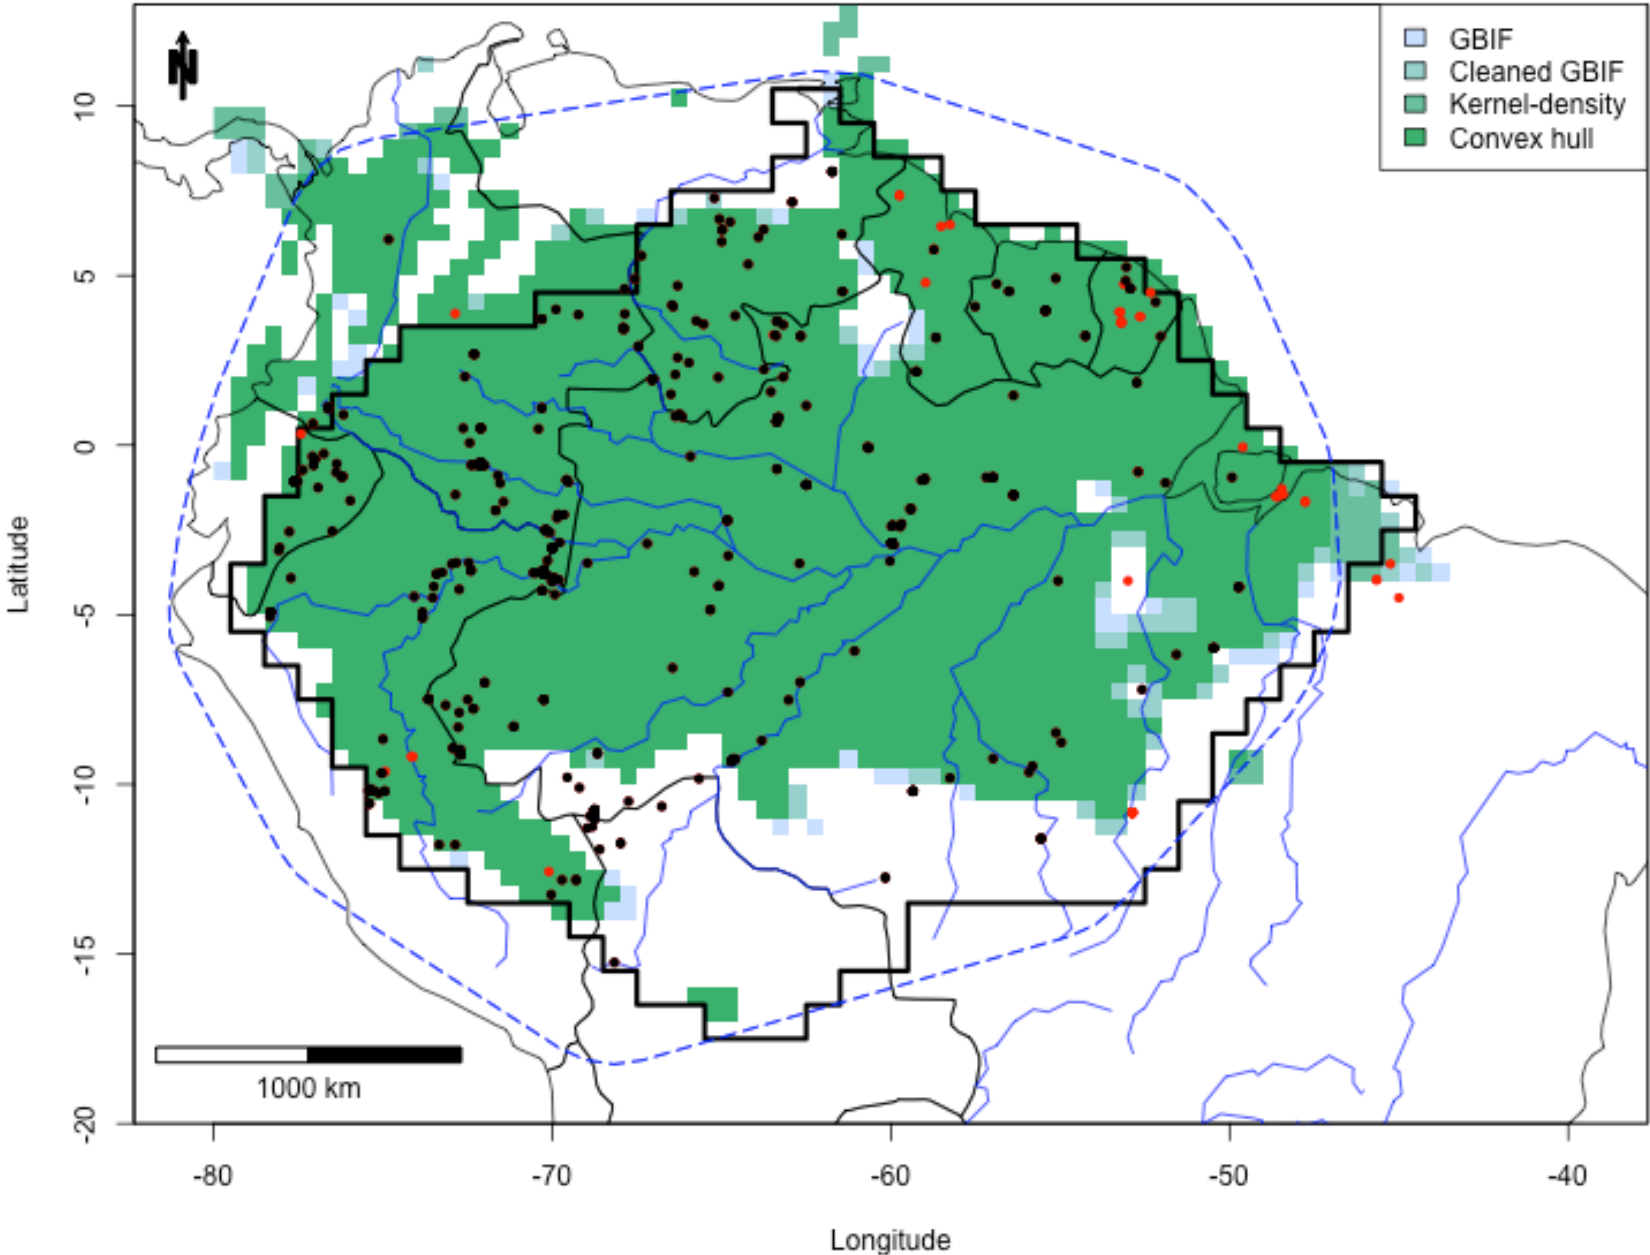



# *Cordia bicolor*

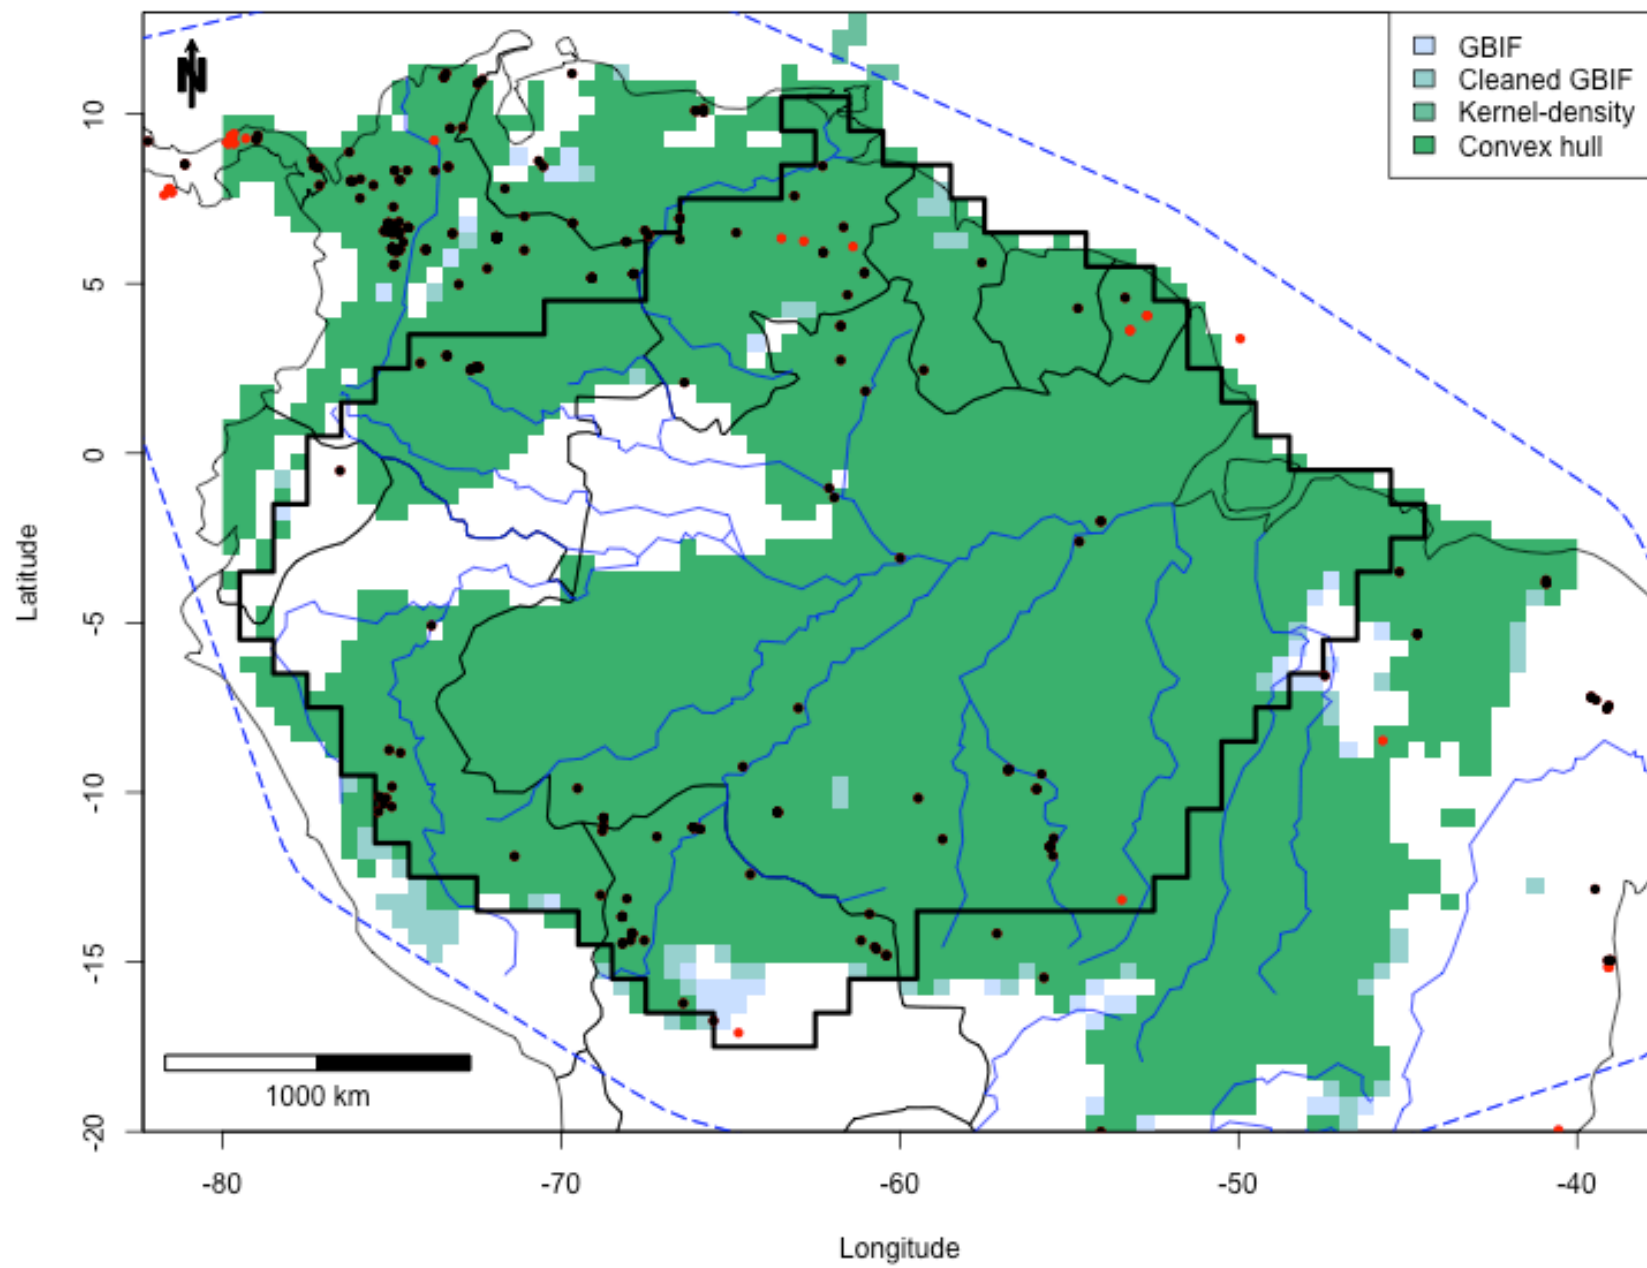

# Couepia guianensis

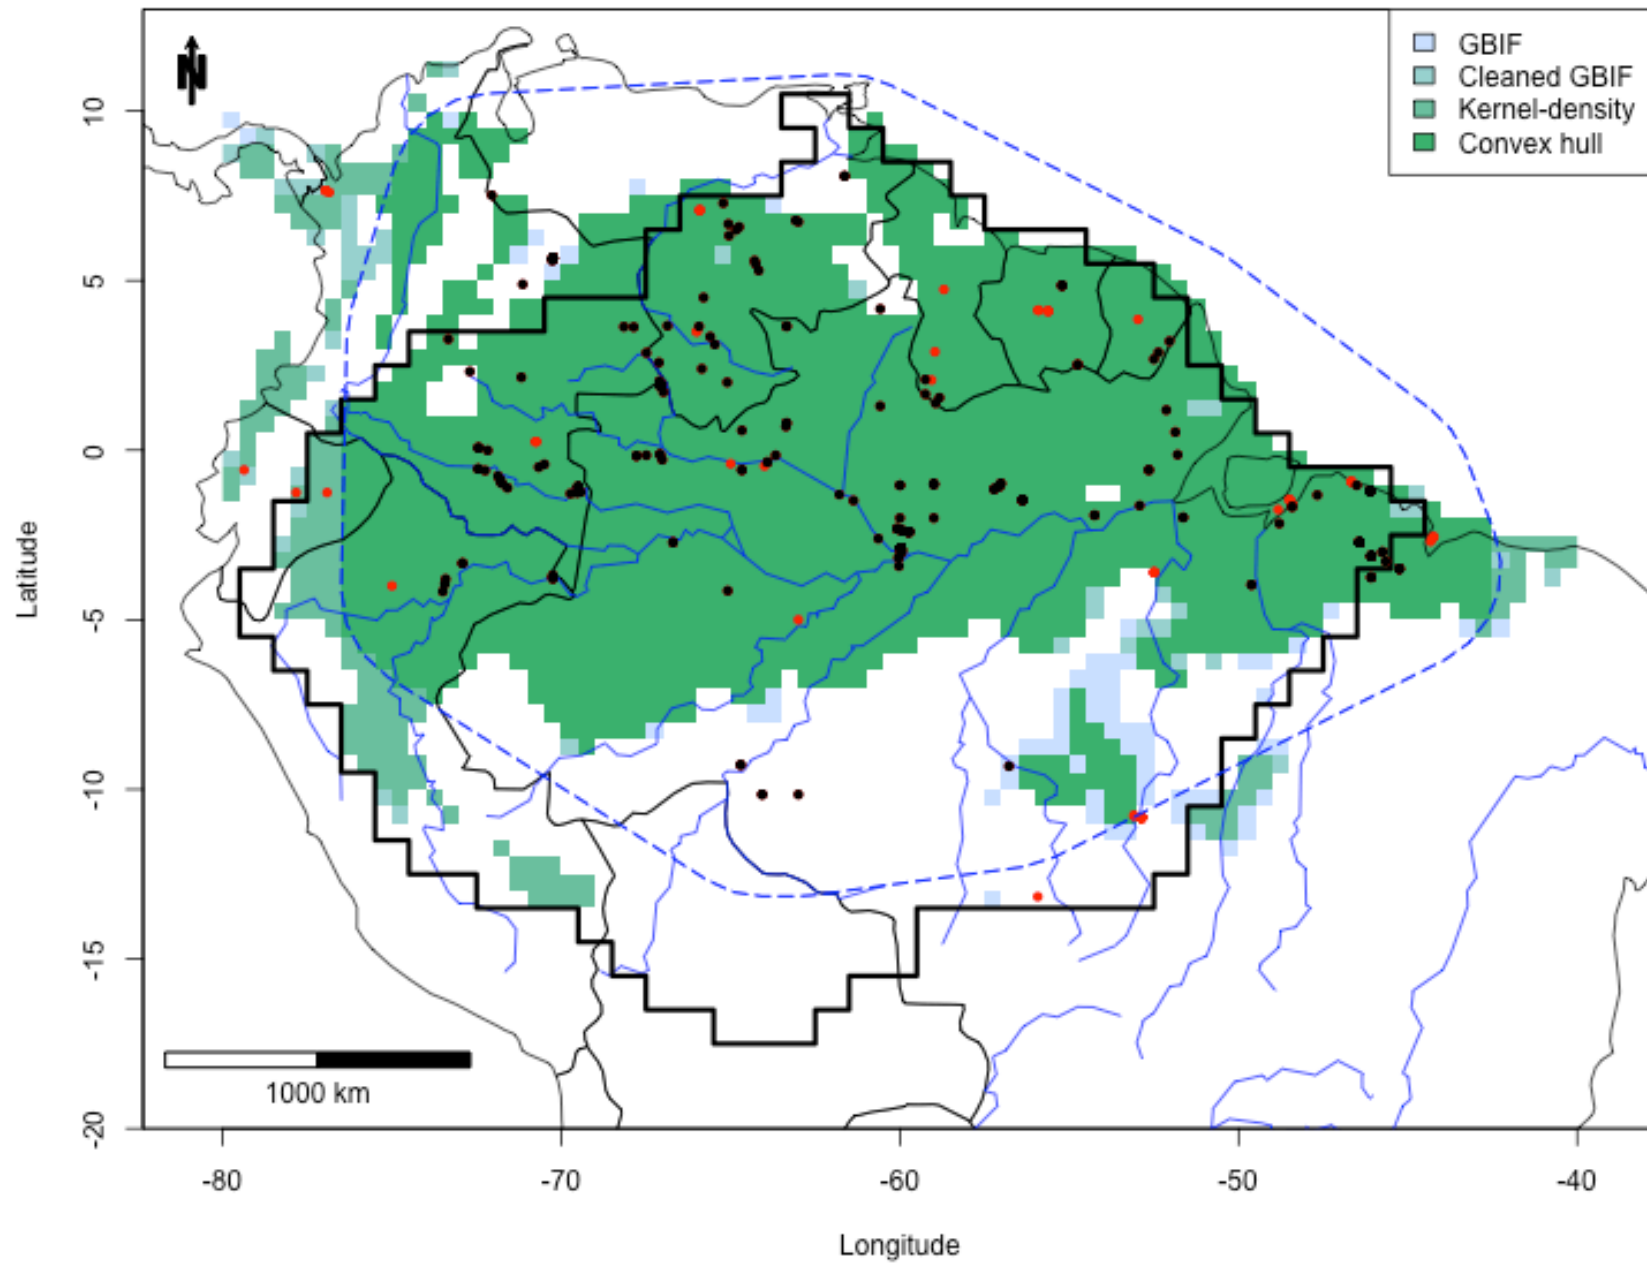

# Couepia paraensis

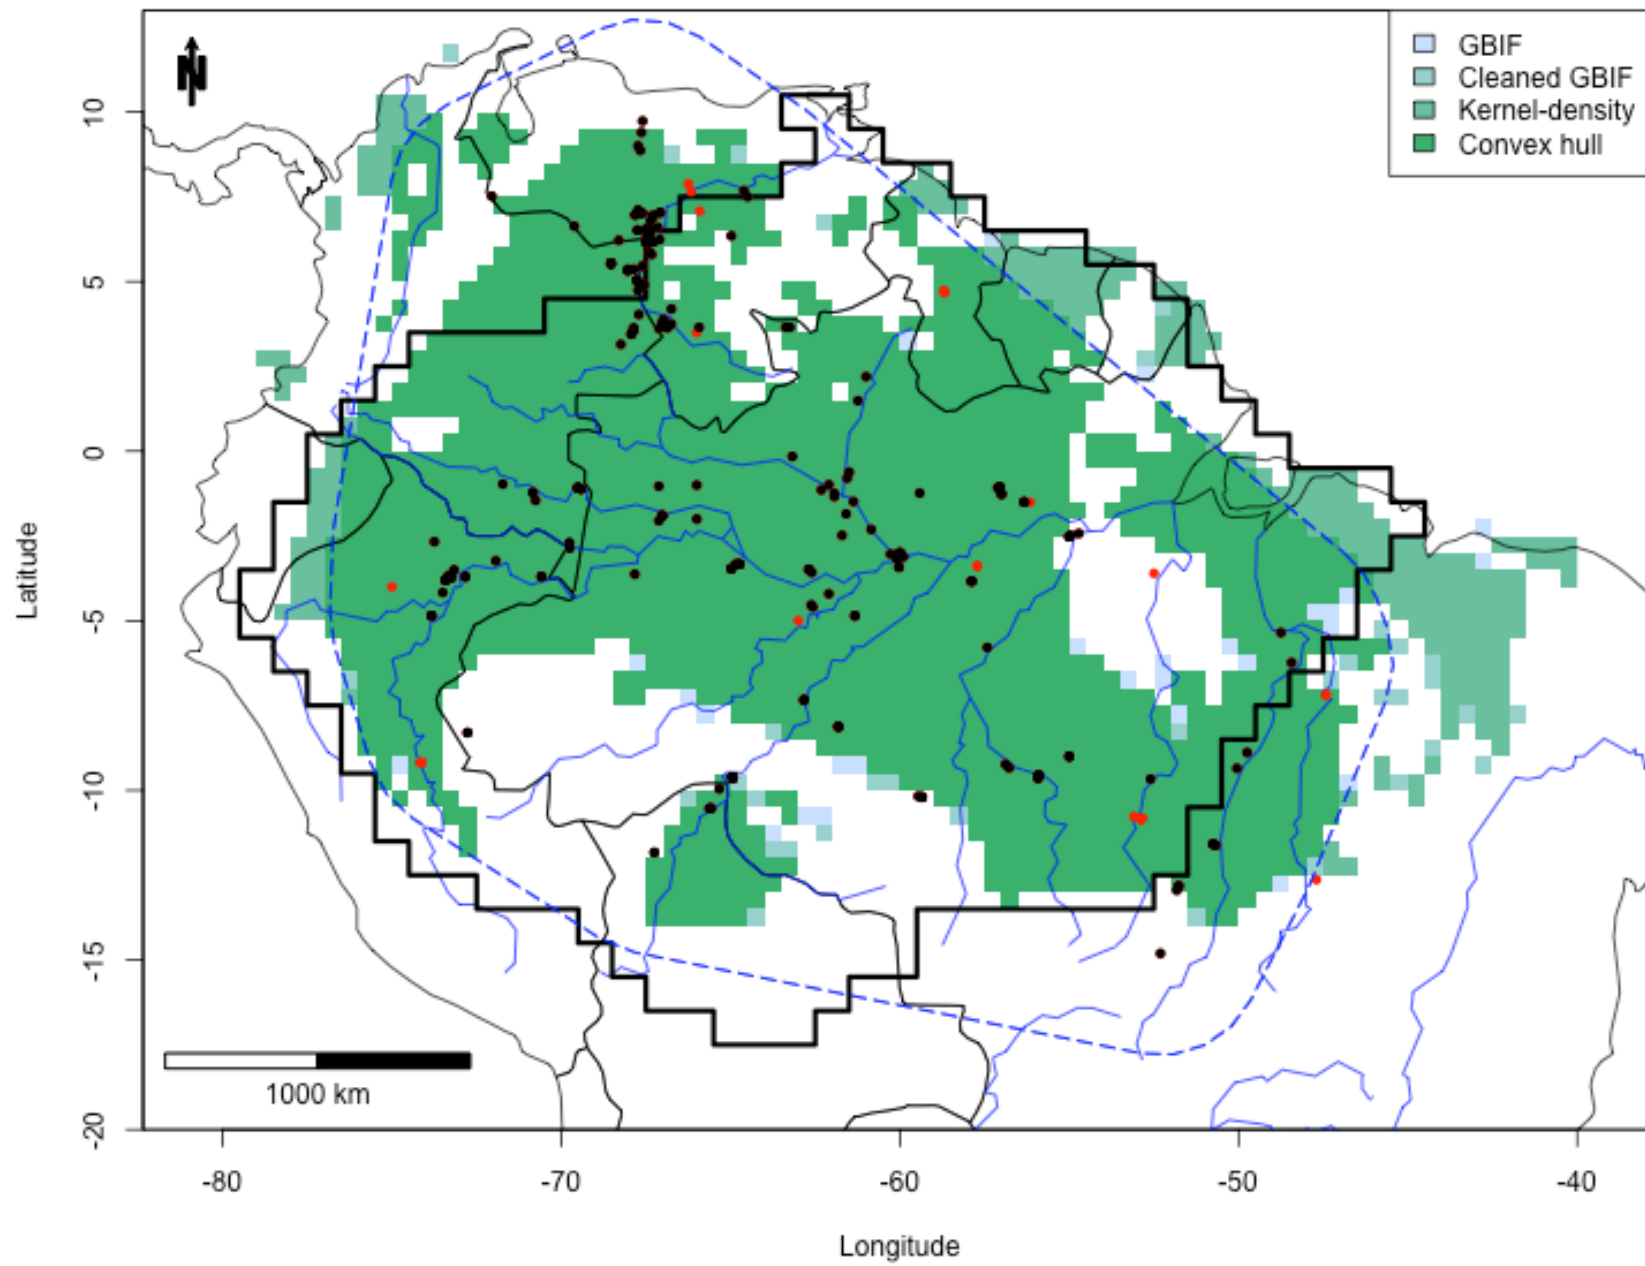

# Crateva tapia

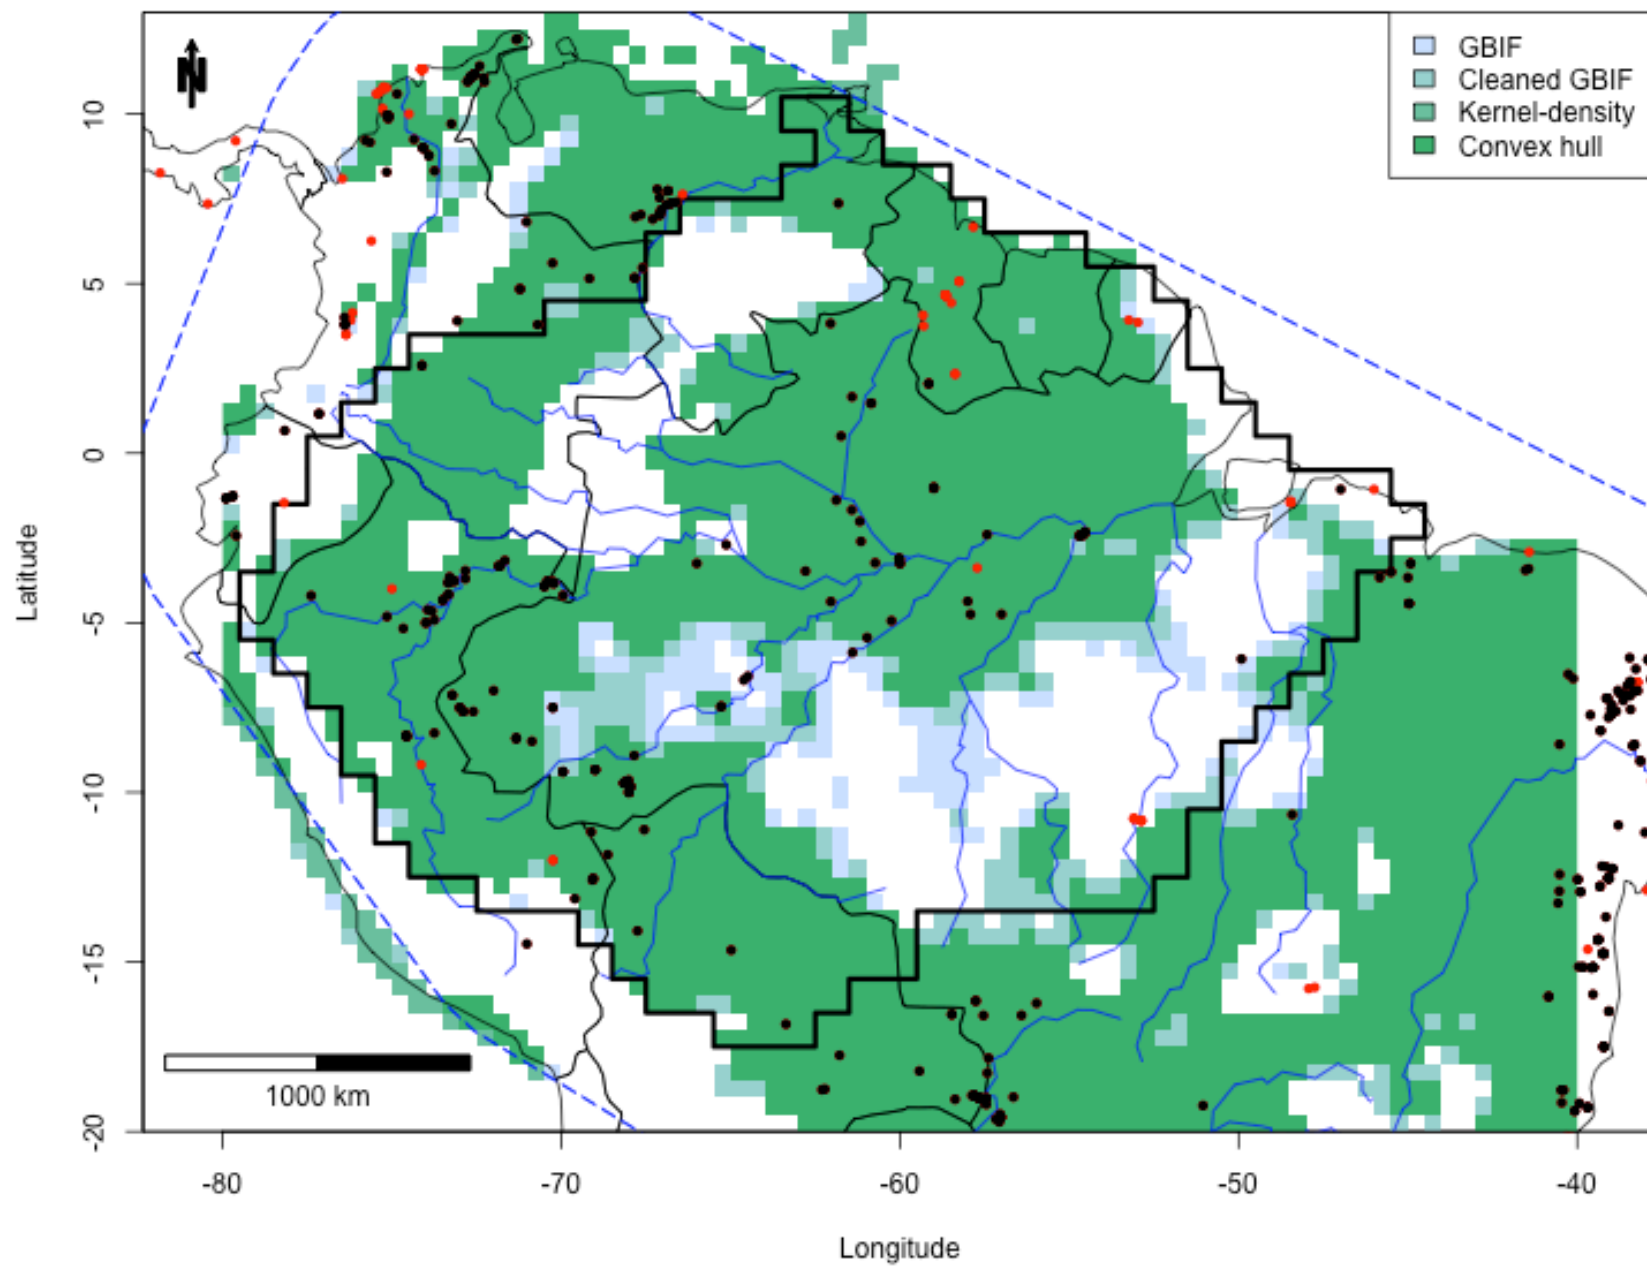

# *Cynometra marginata*

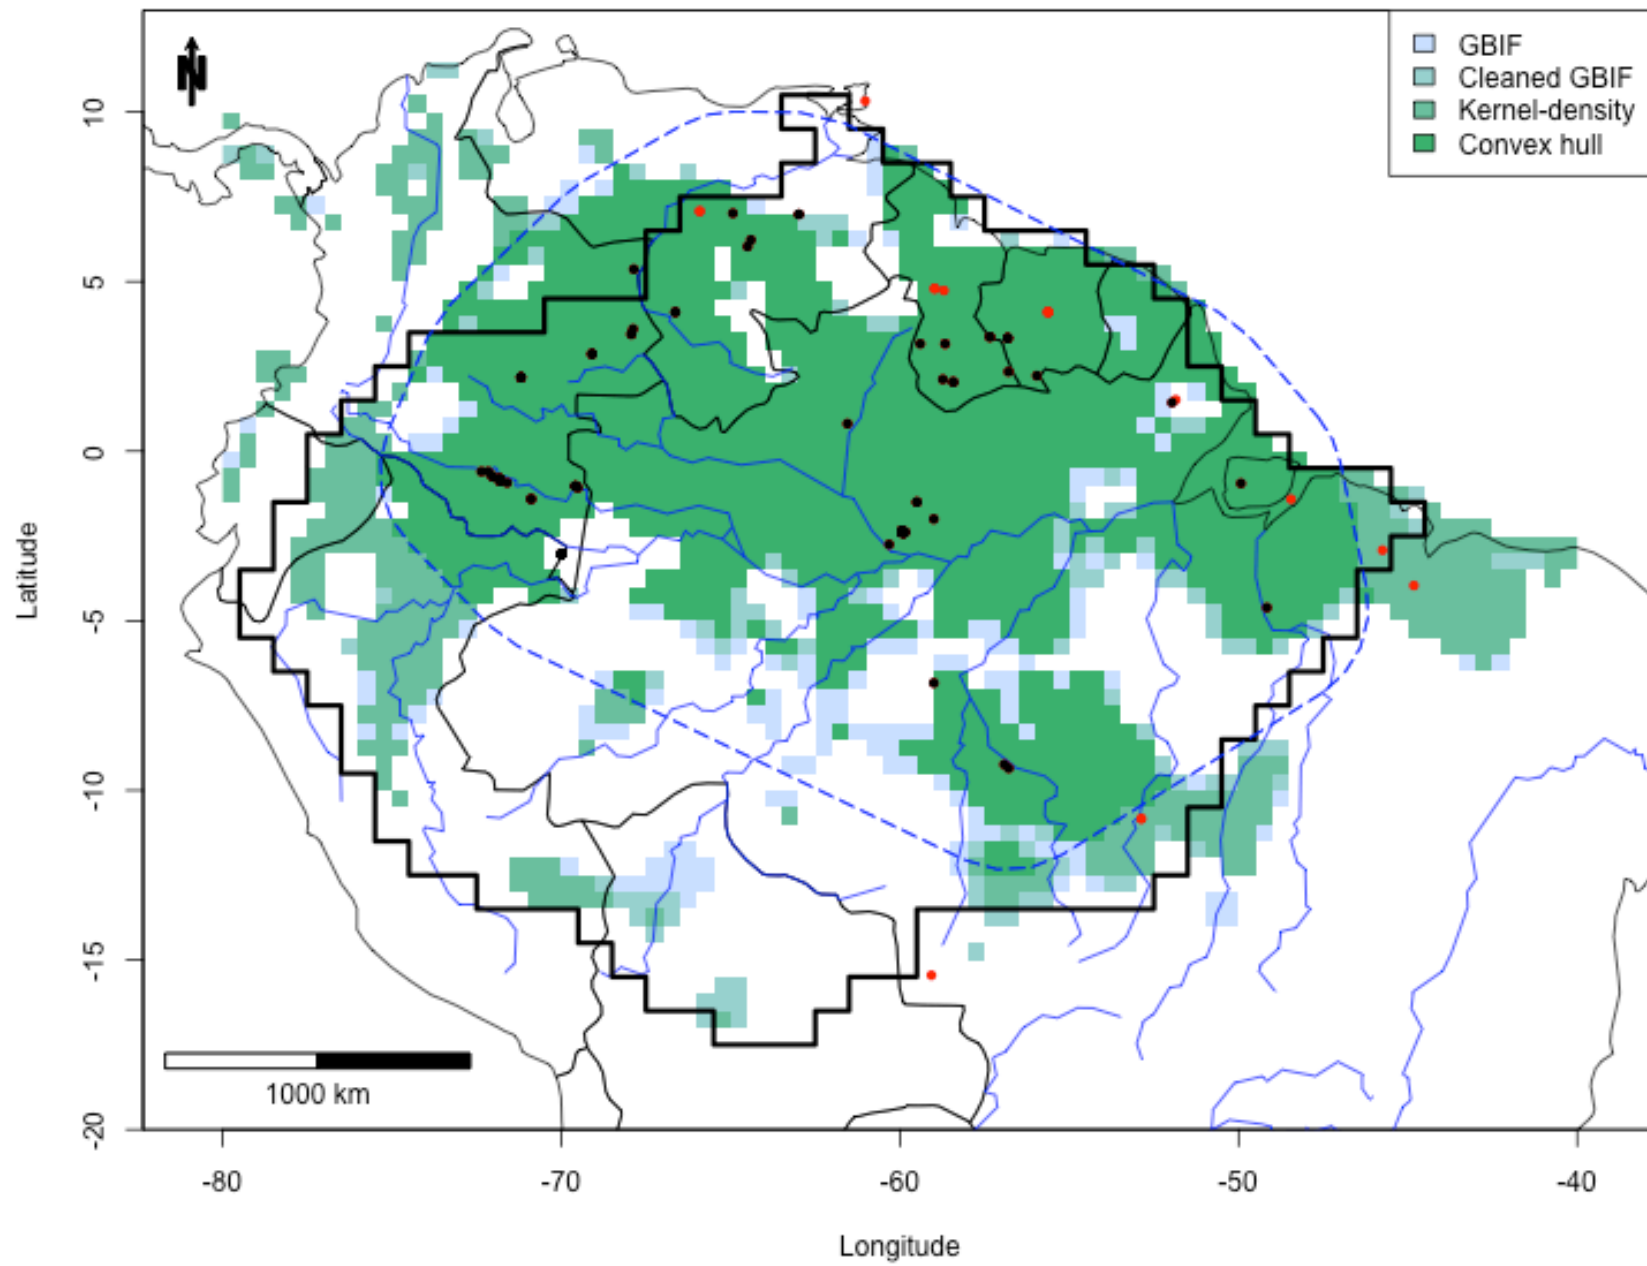

# Dialium guianense

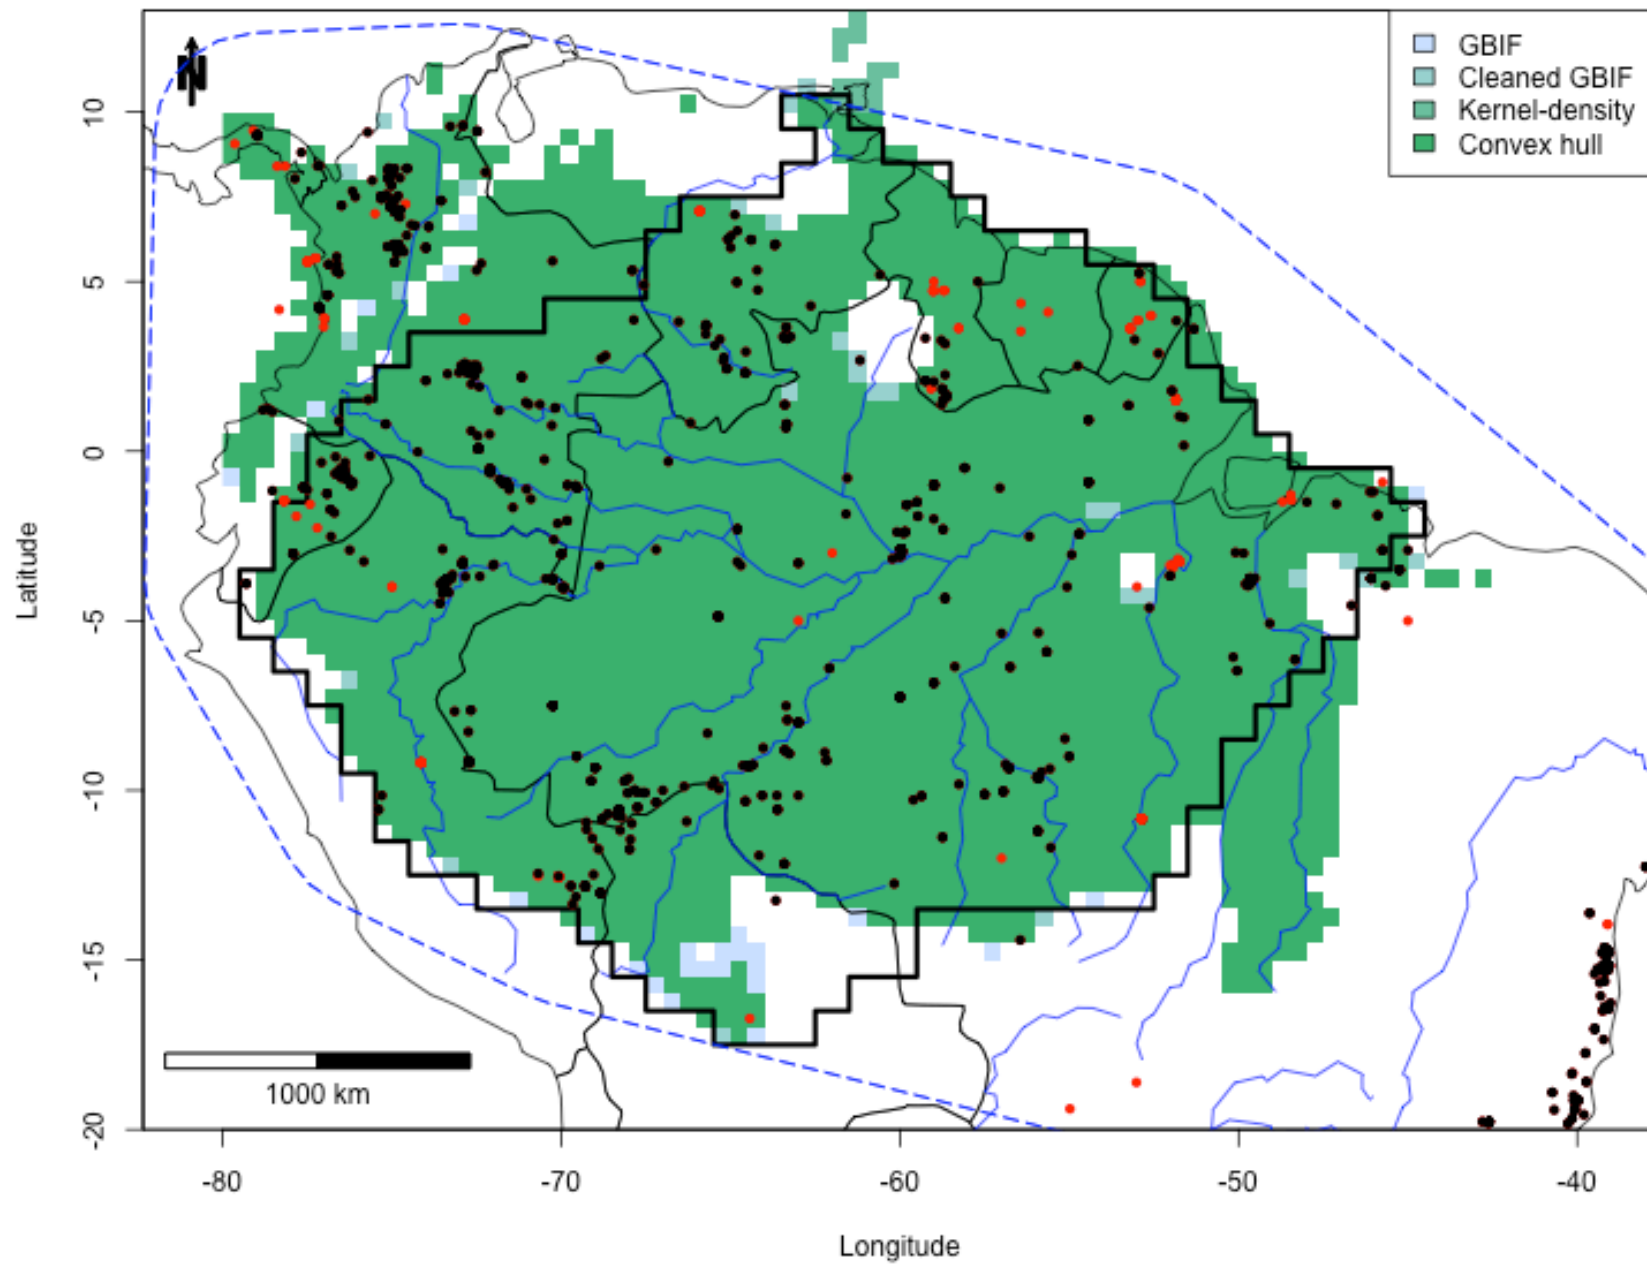

*Dicymbe corymbosa*

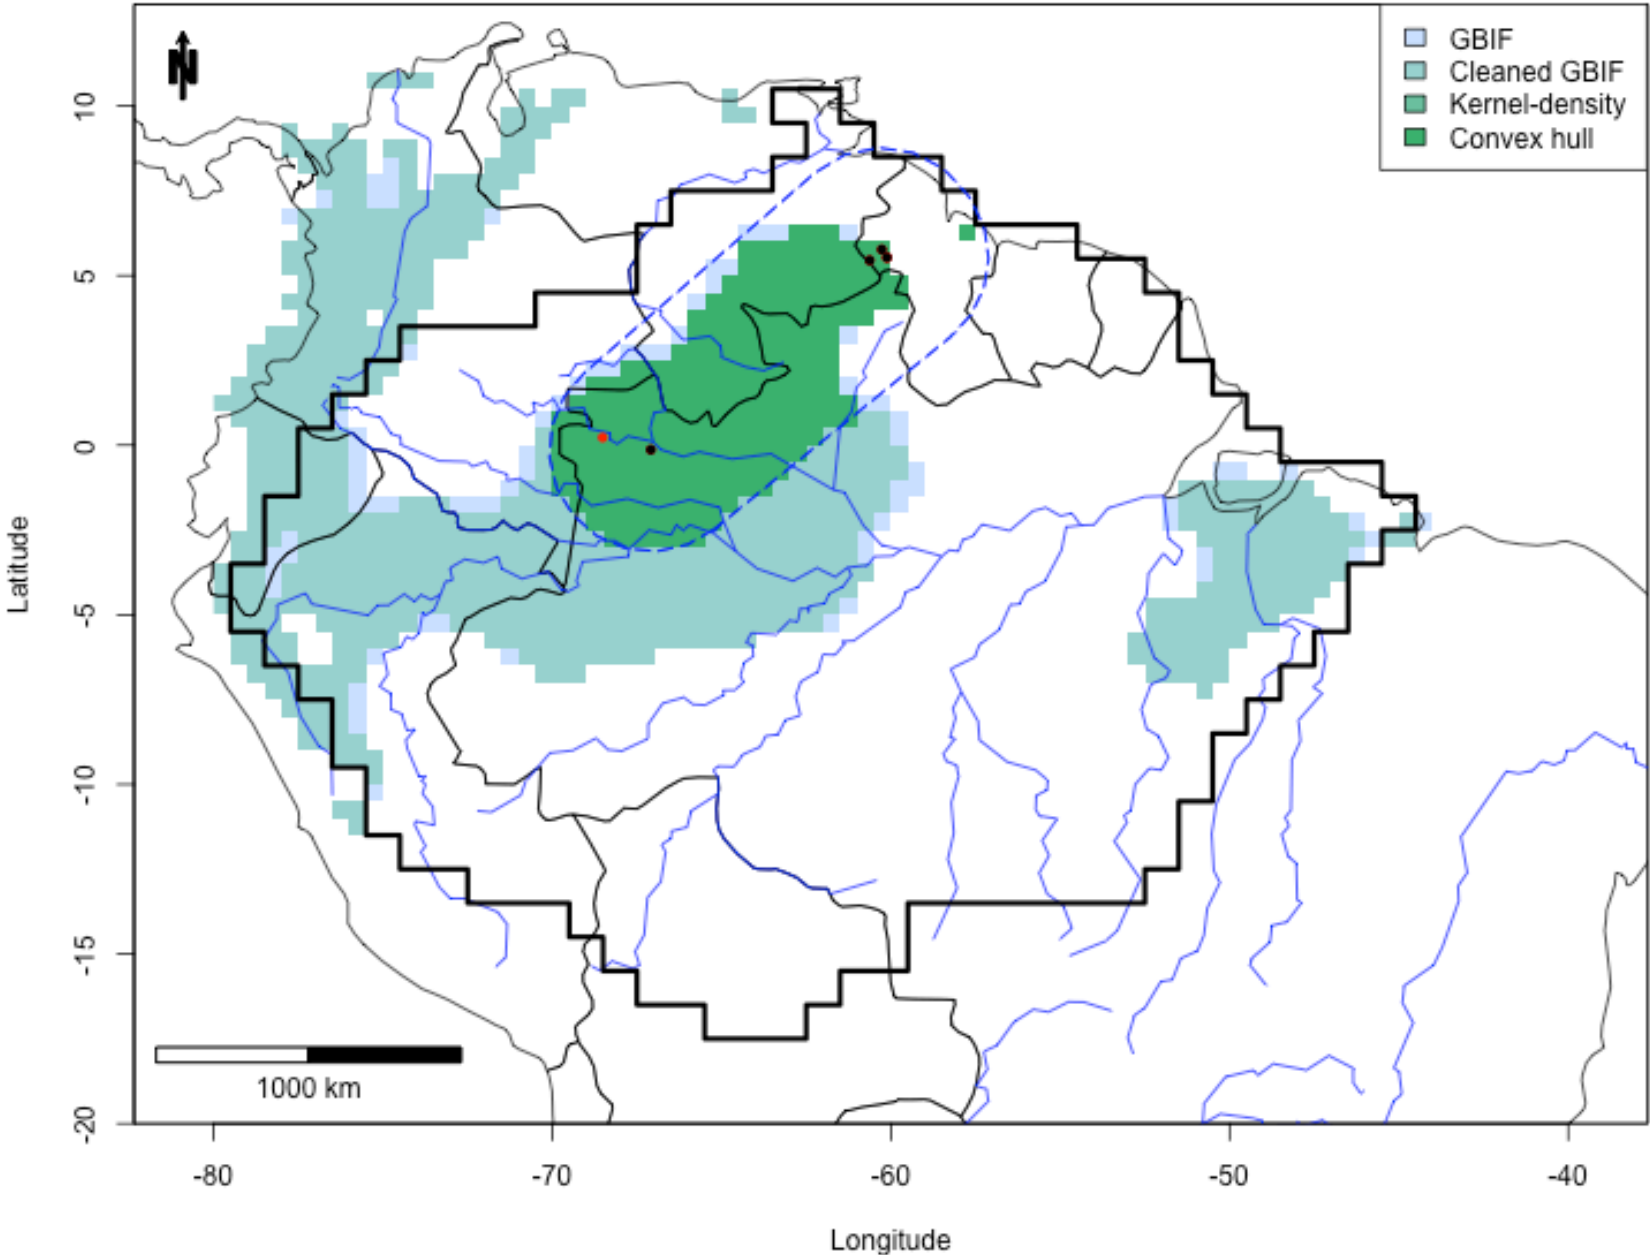



# Diploptropis purpurea

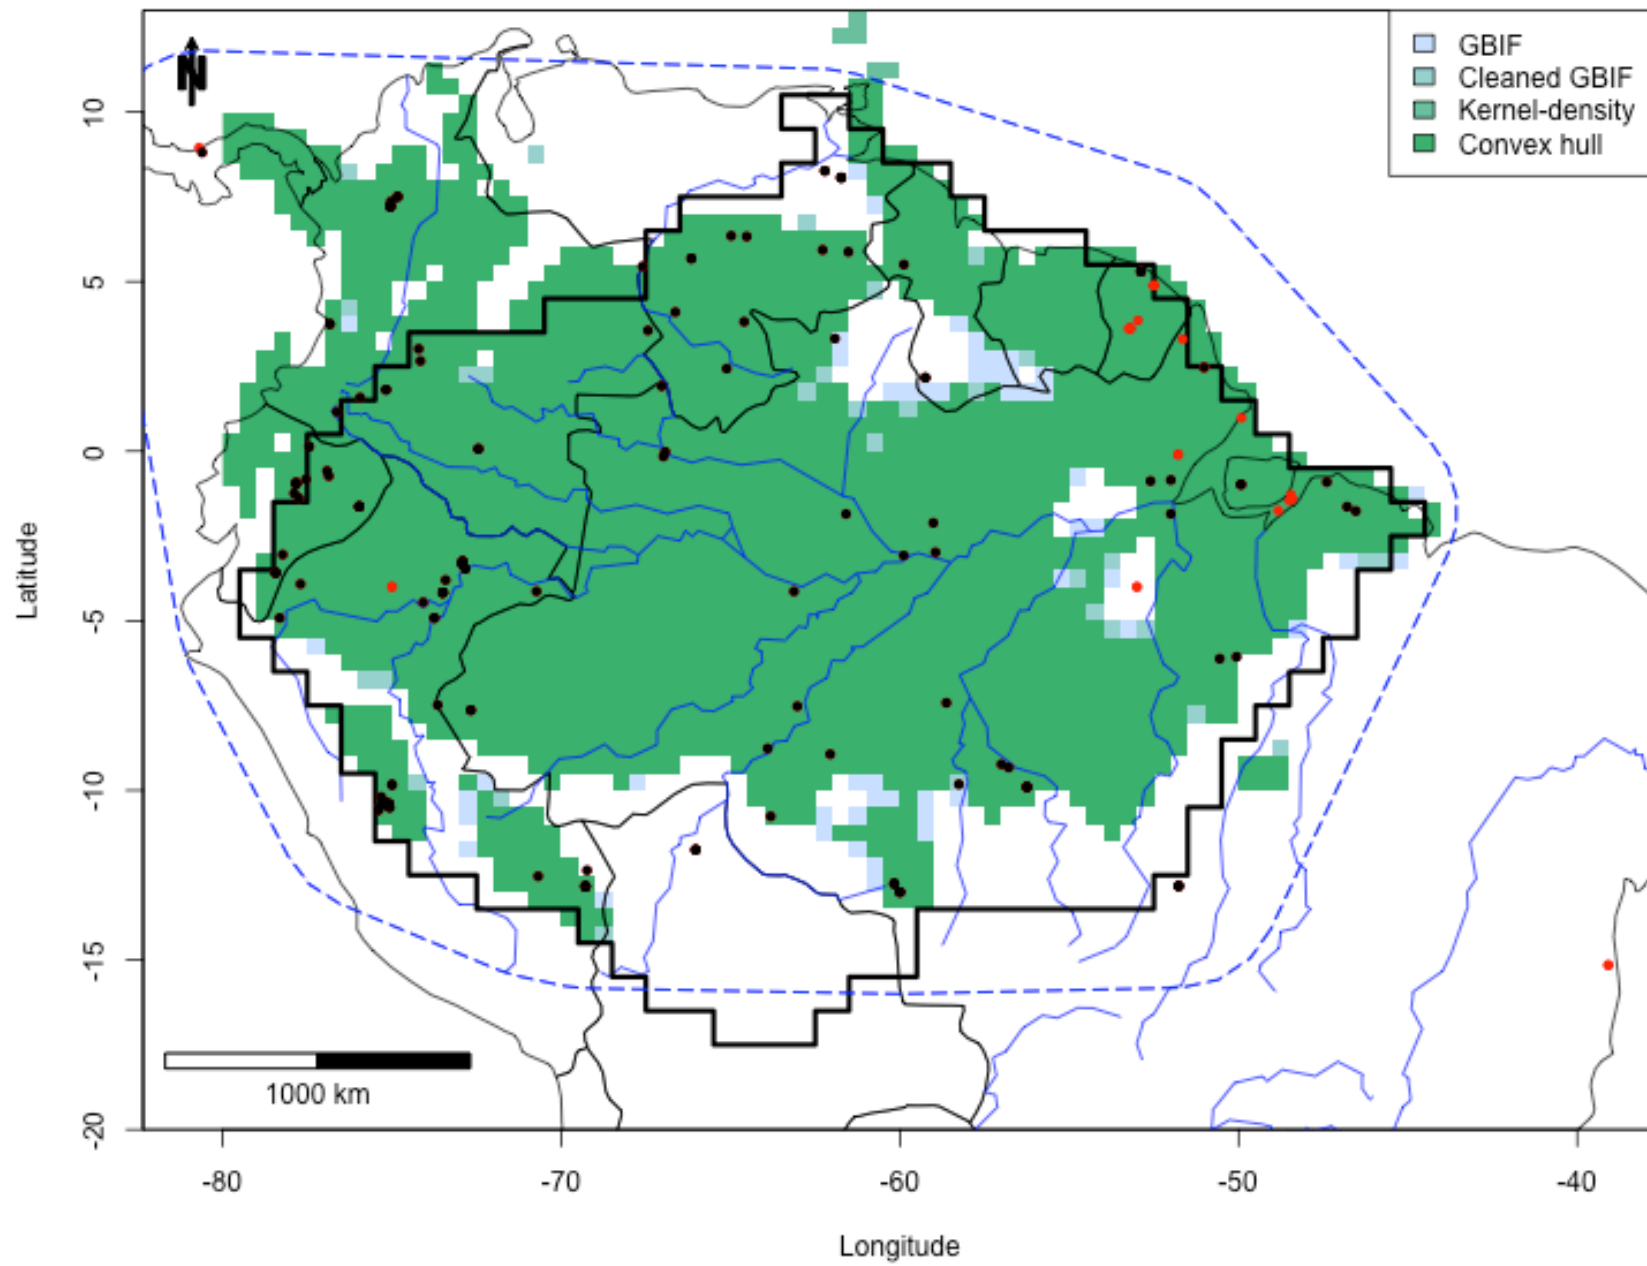



# Drypetes amazonica

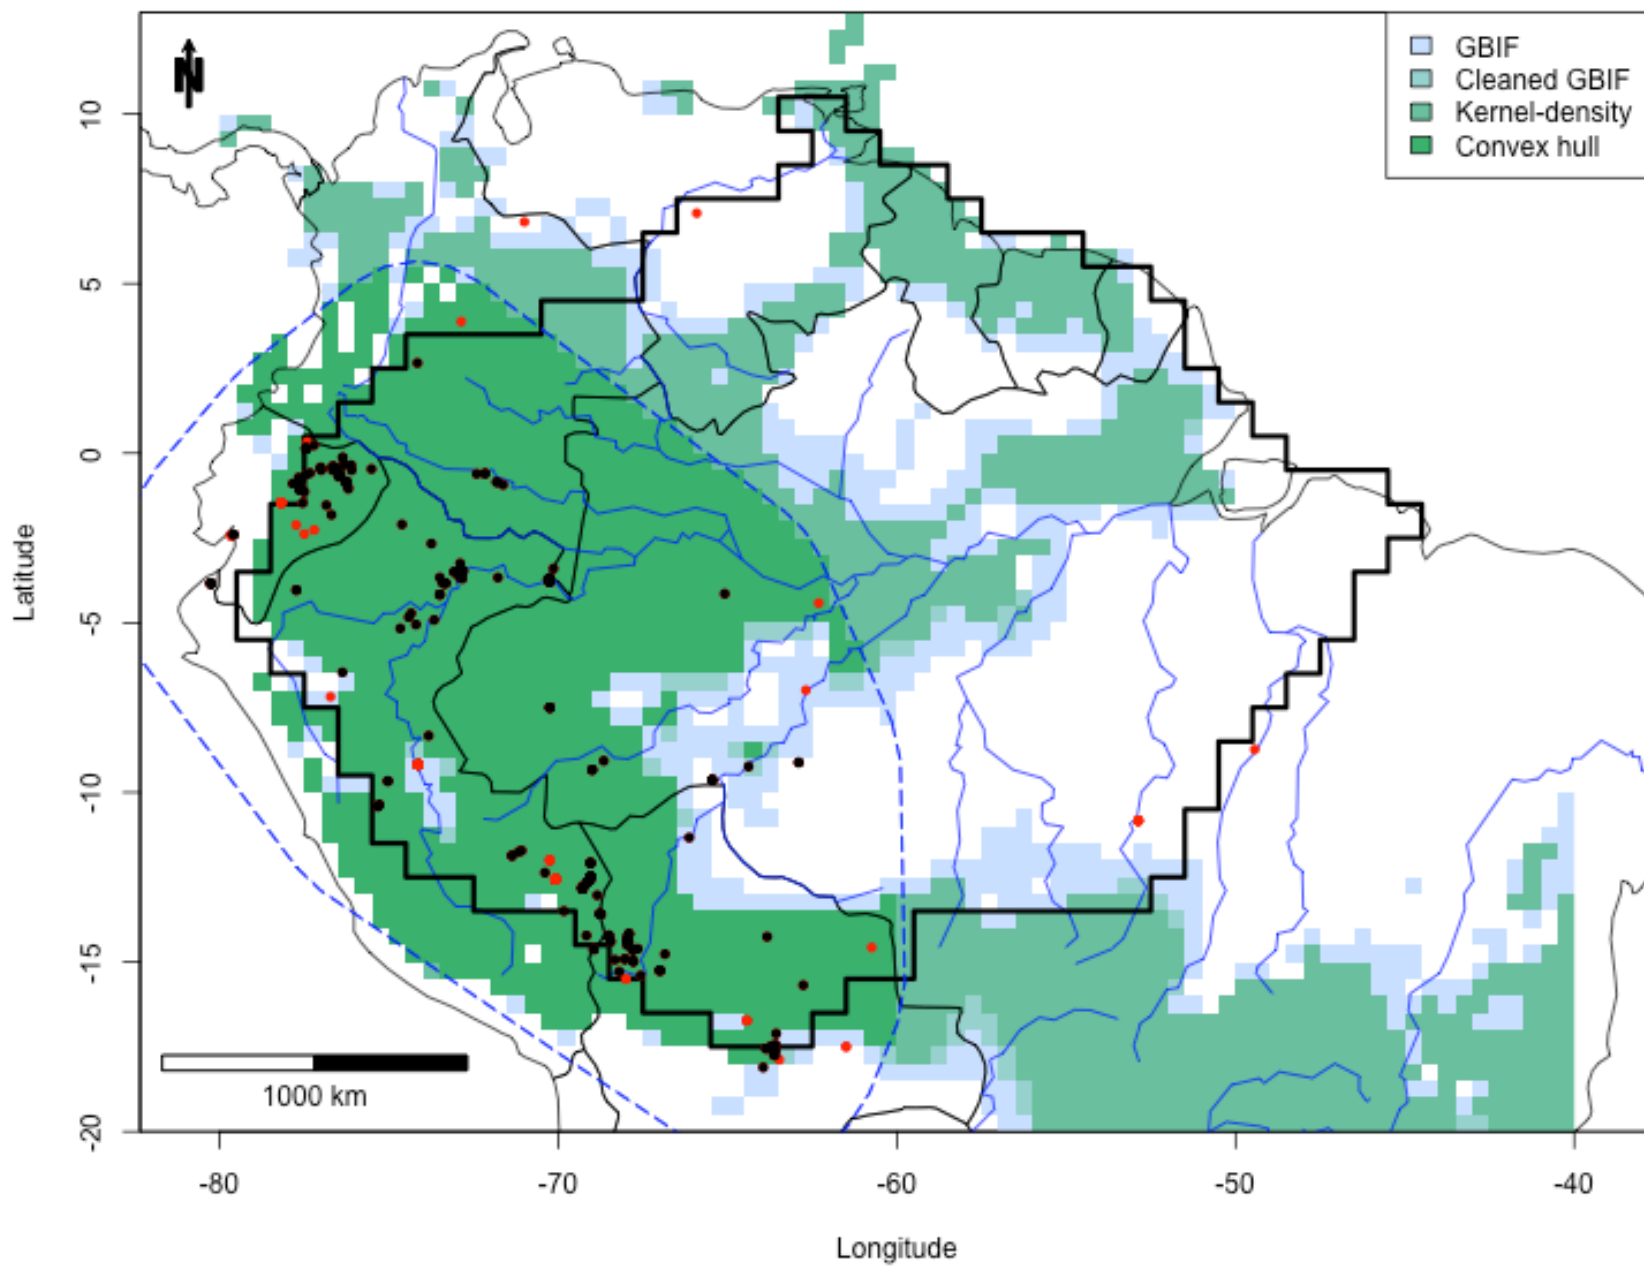

# *Ecclinusa guianensis*

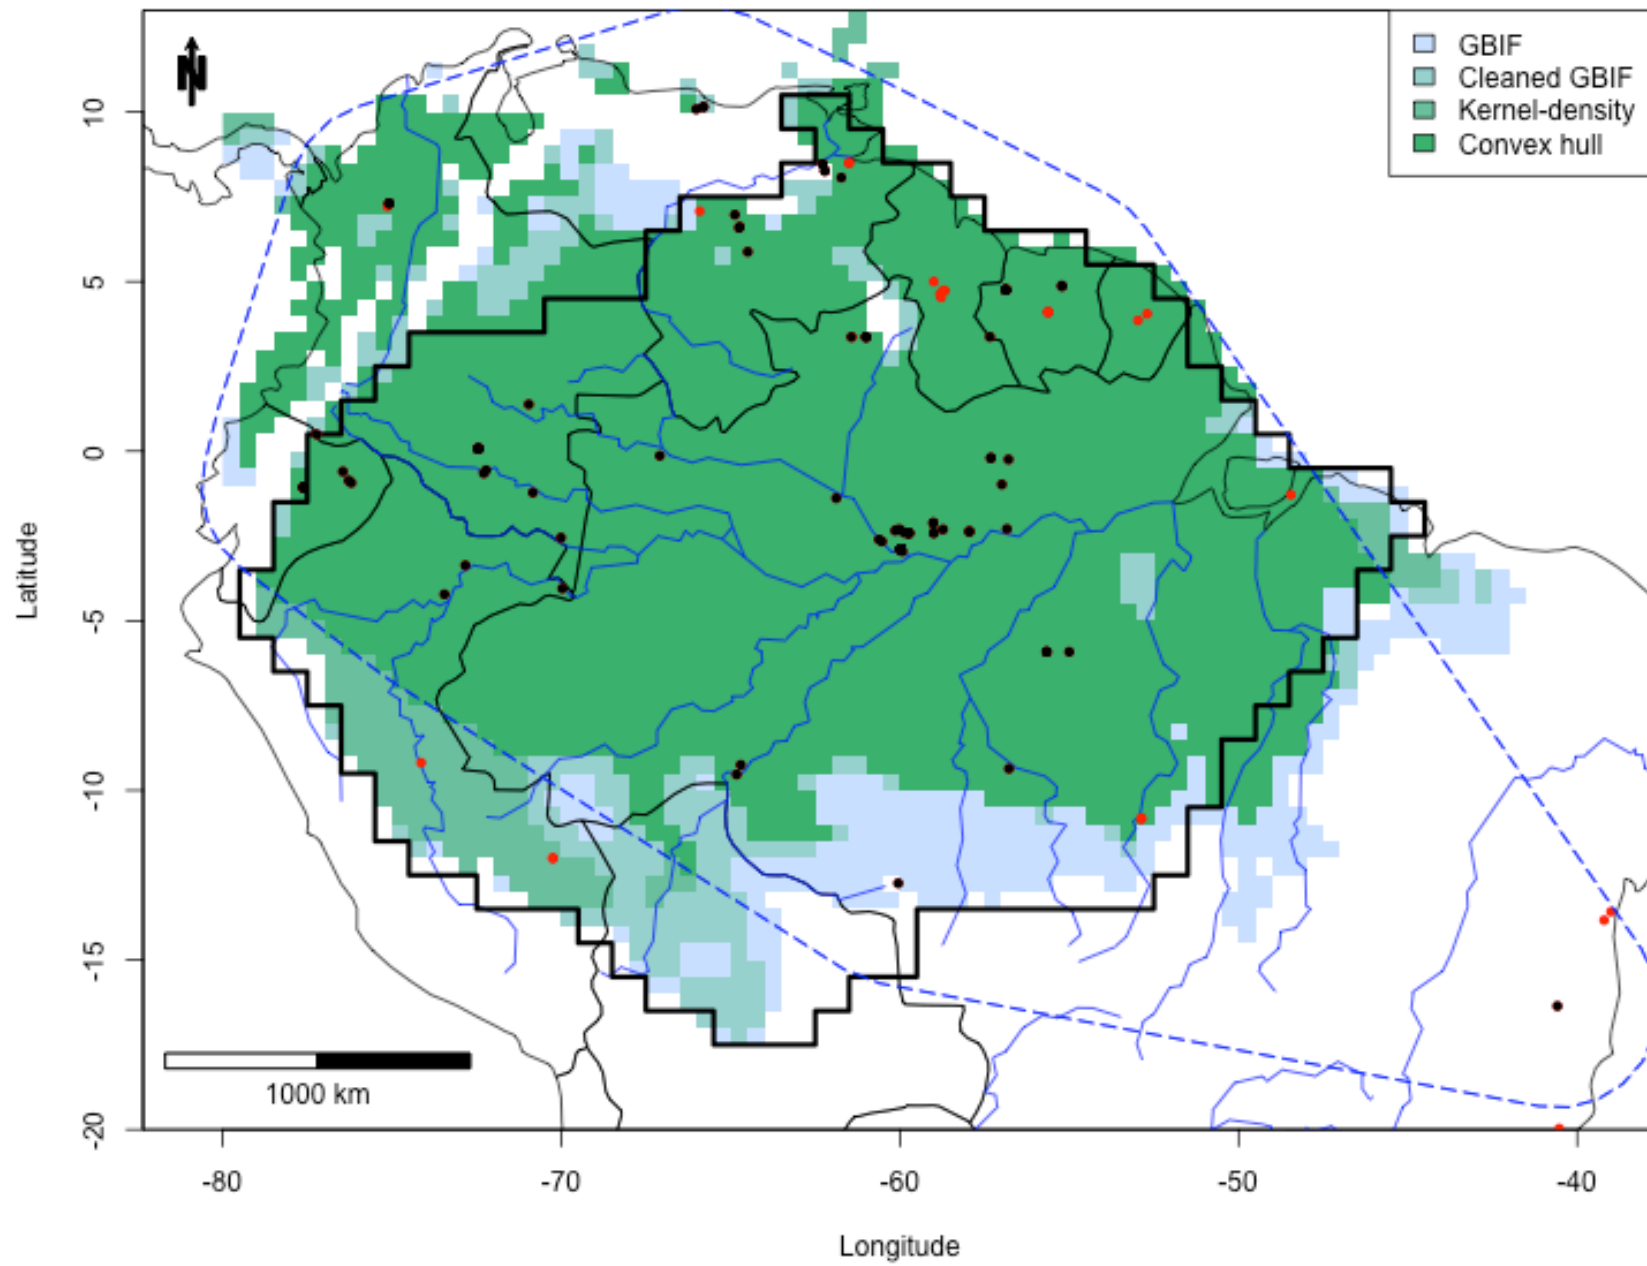

# Enterolobium schomburgkii

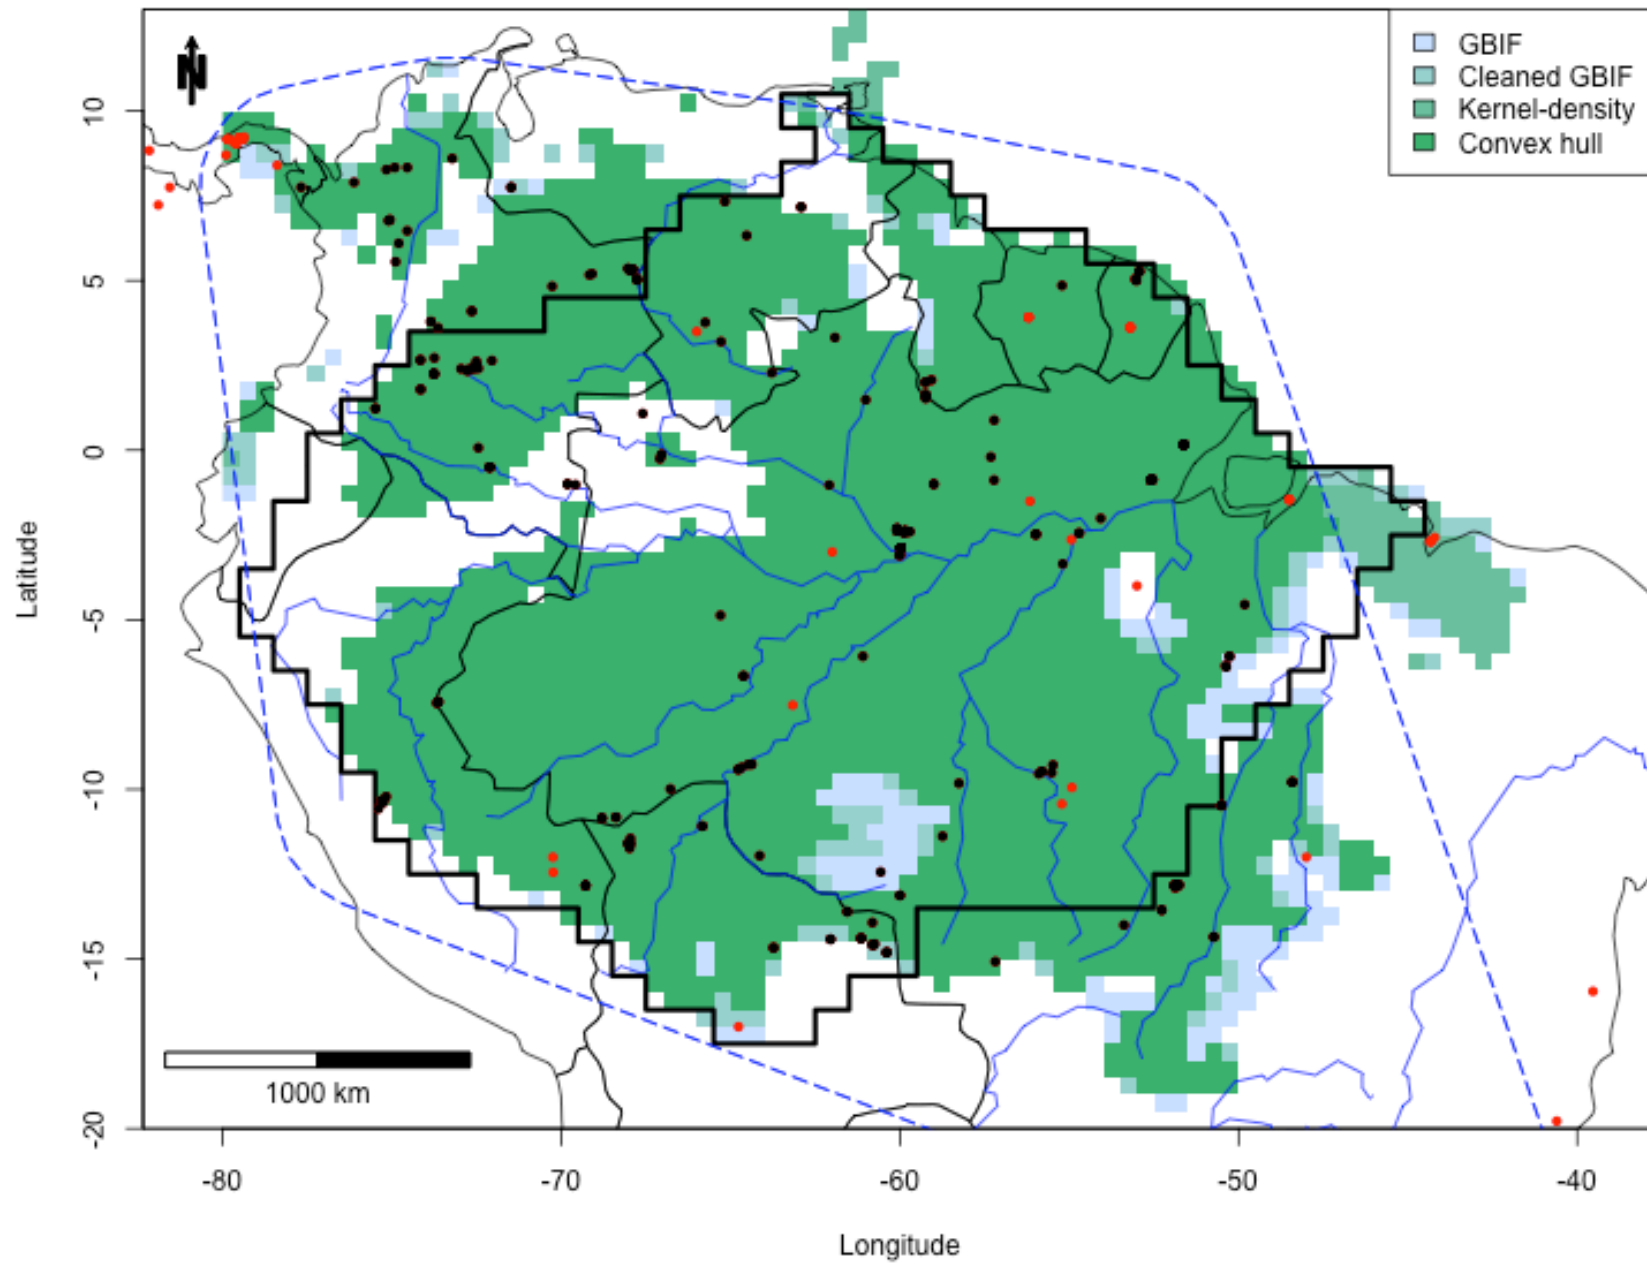

# *Eperua falcata*

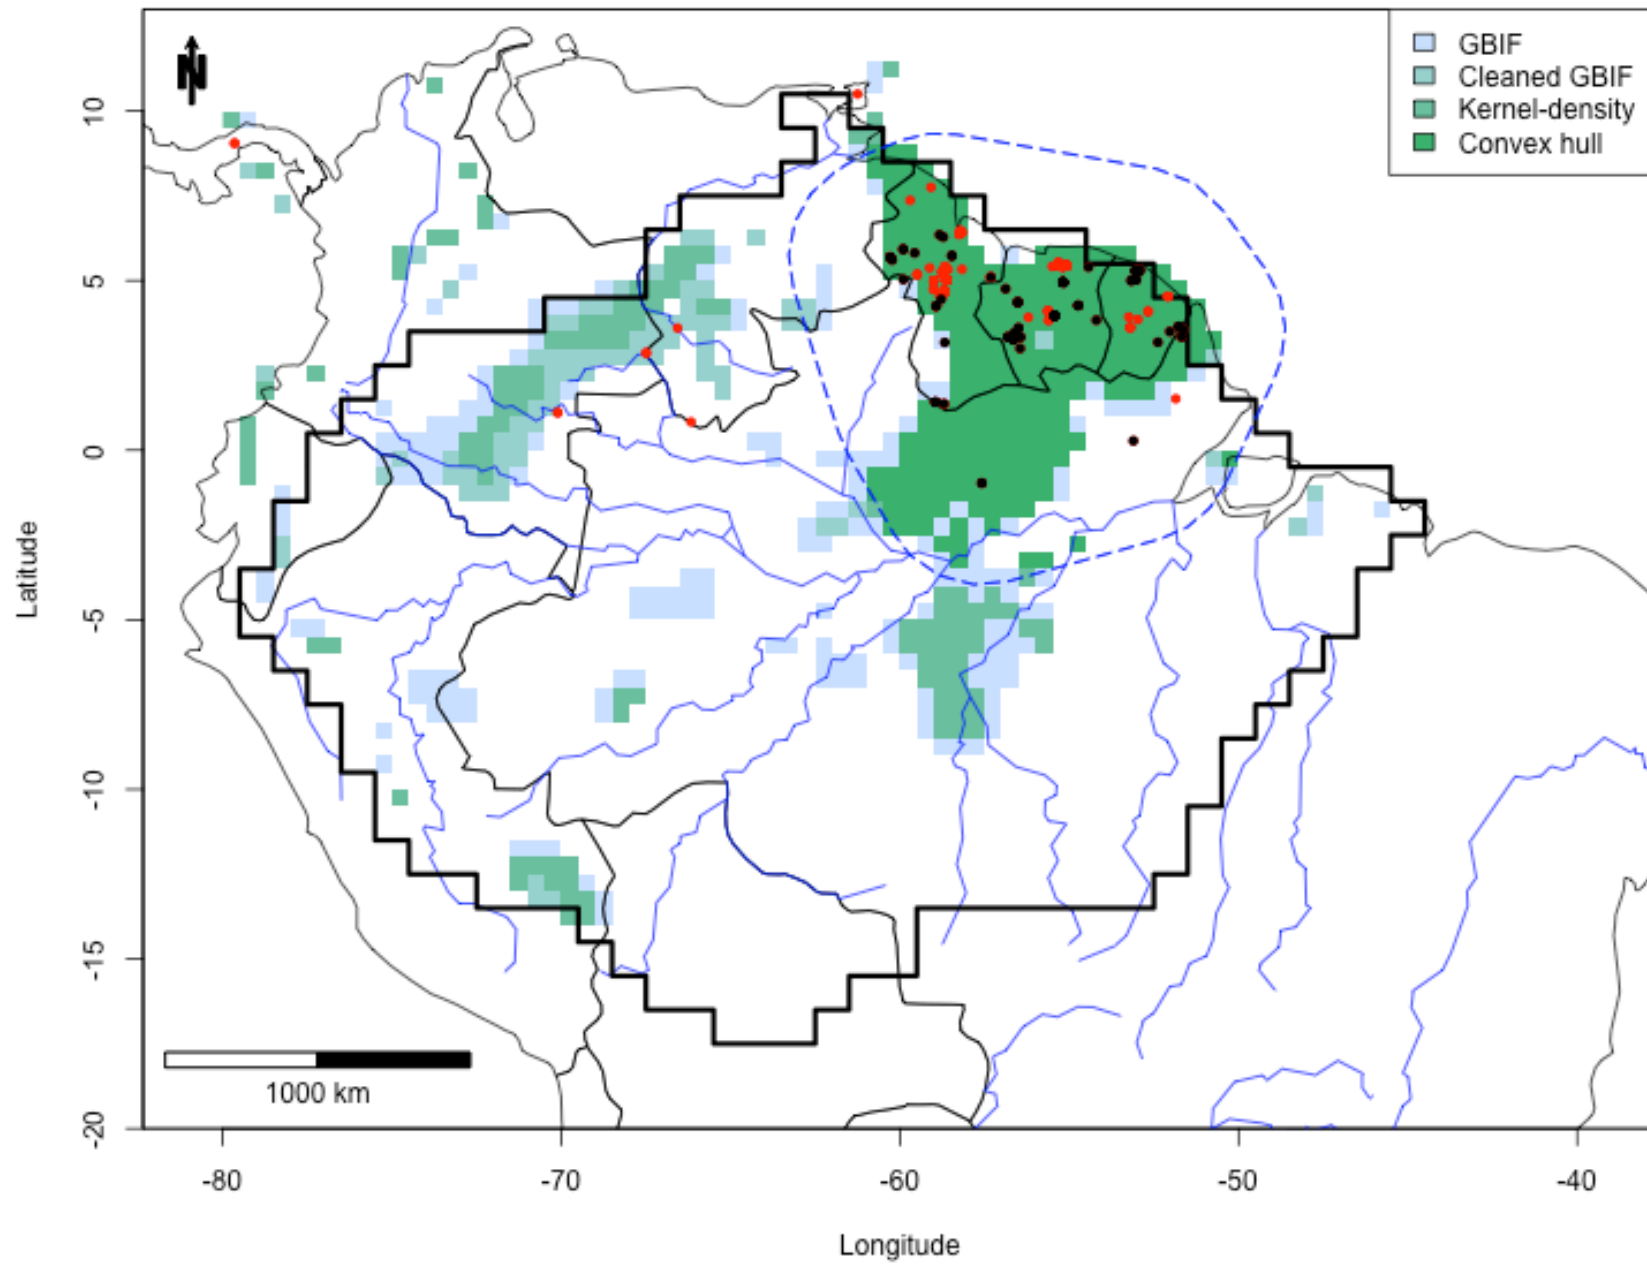

# *Eperua grandiflora*

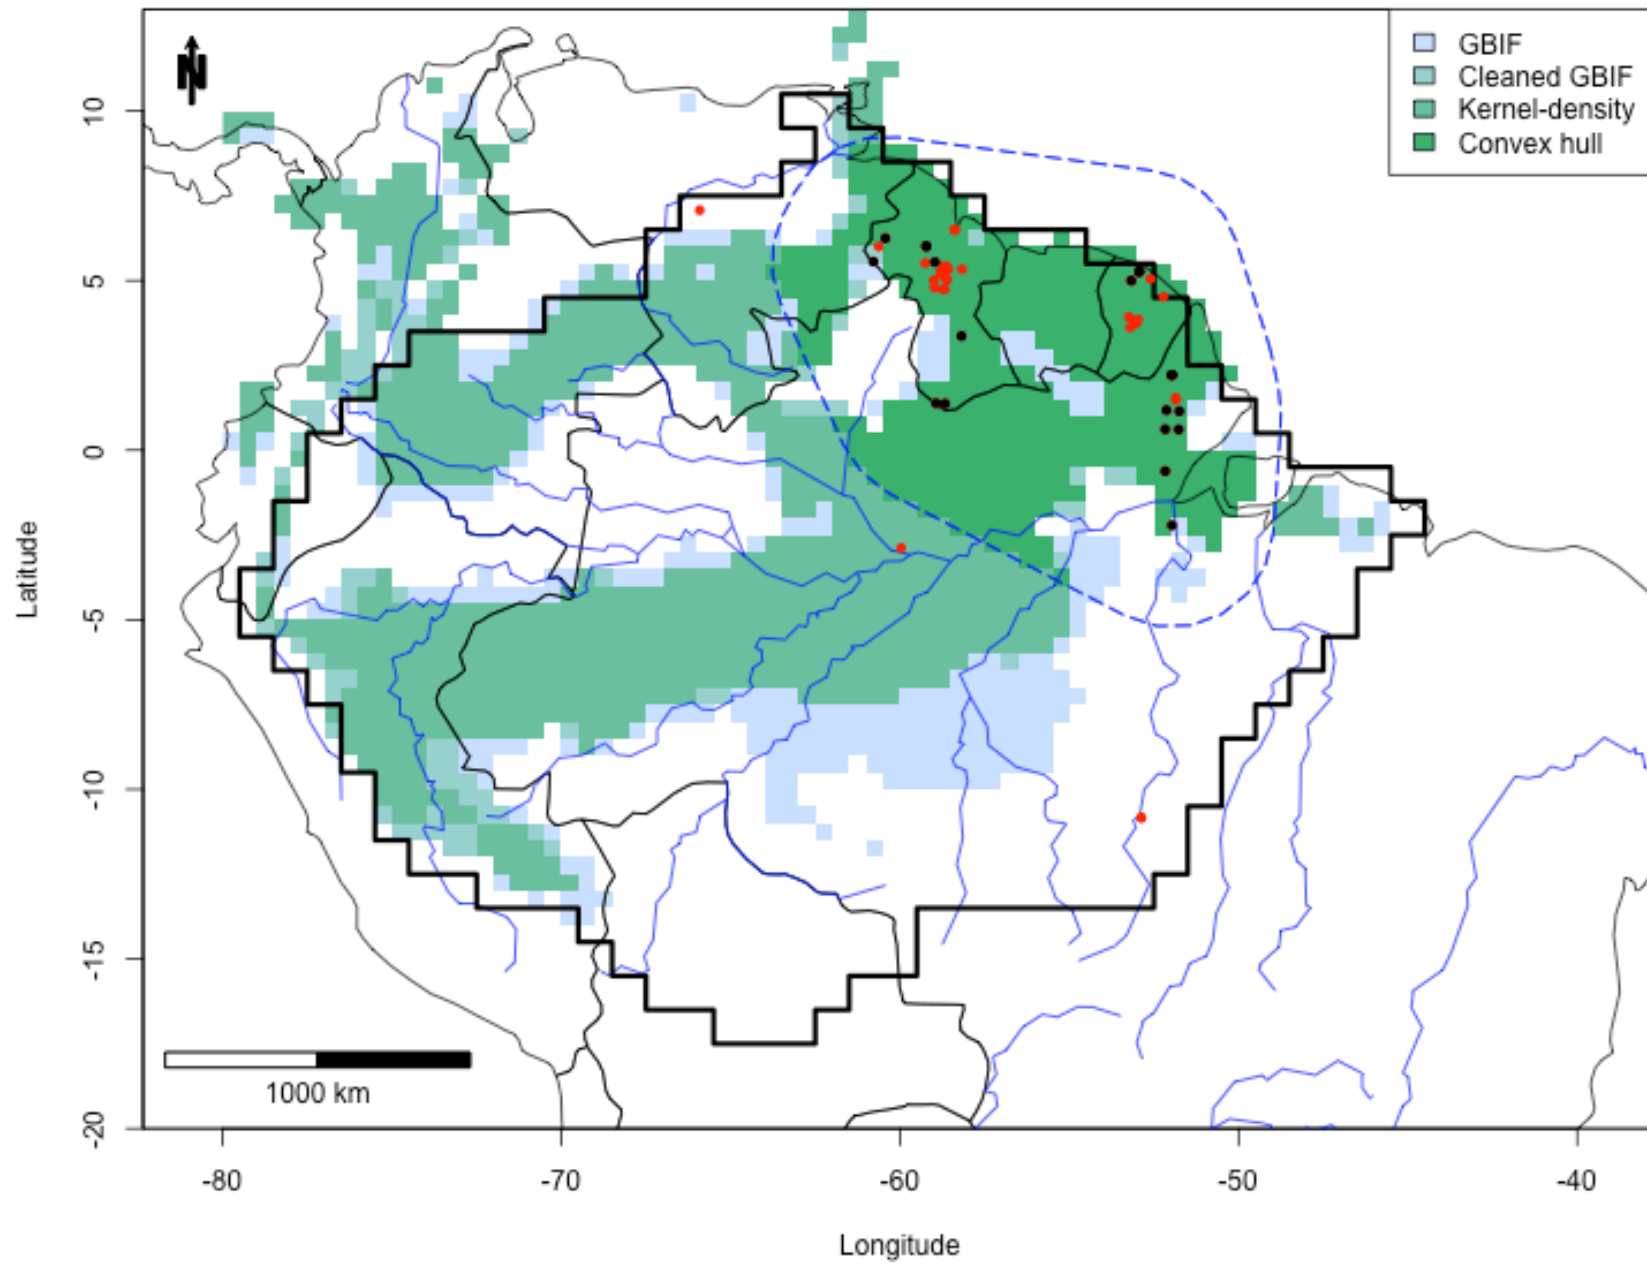

# *Eperua leucantha*

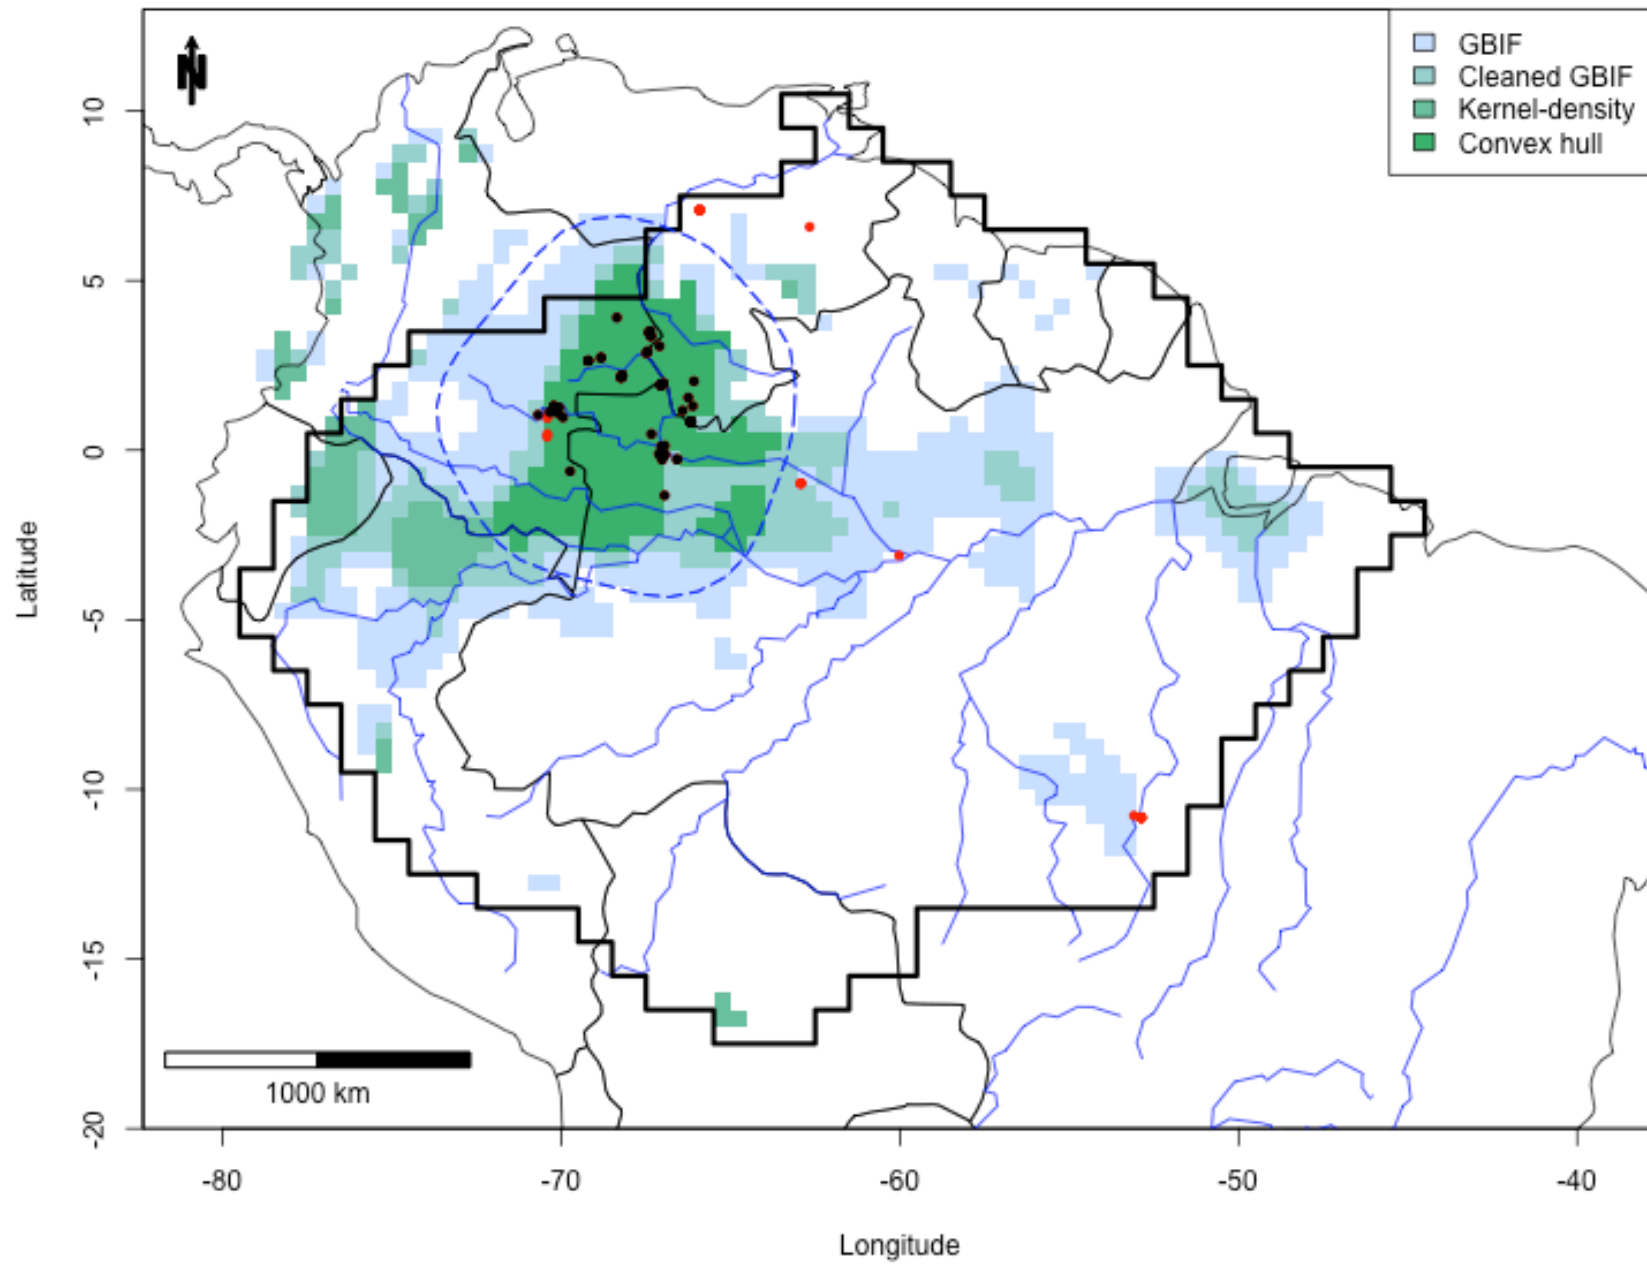

# *Eperua purpurea*

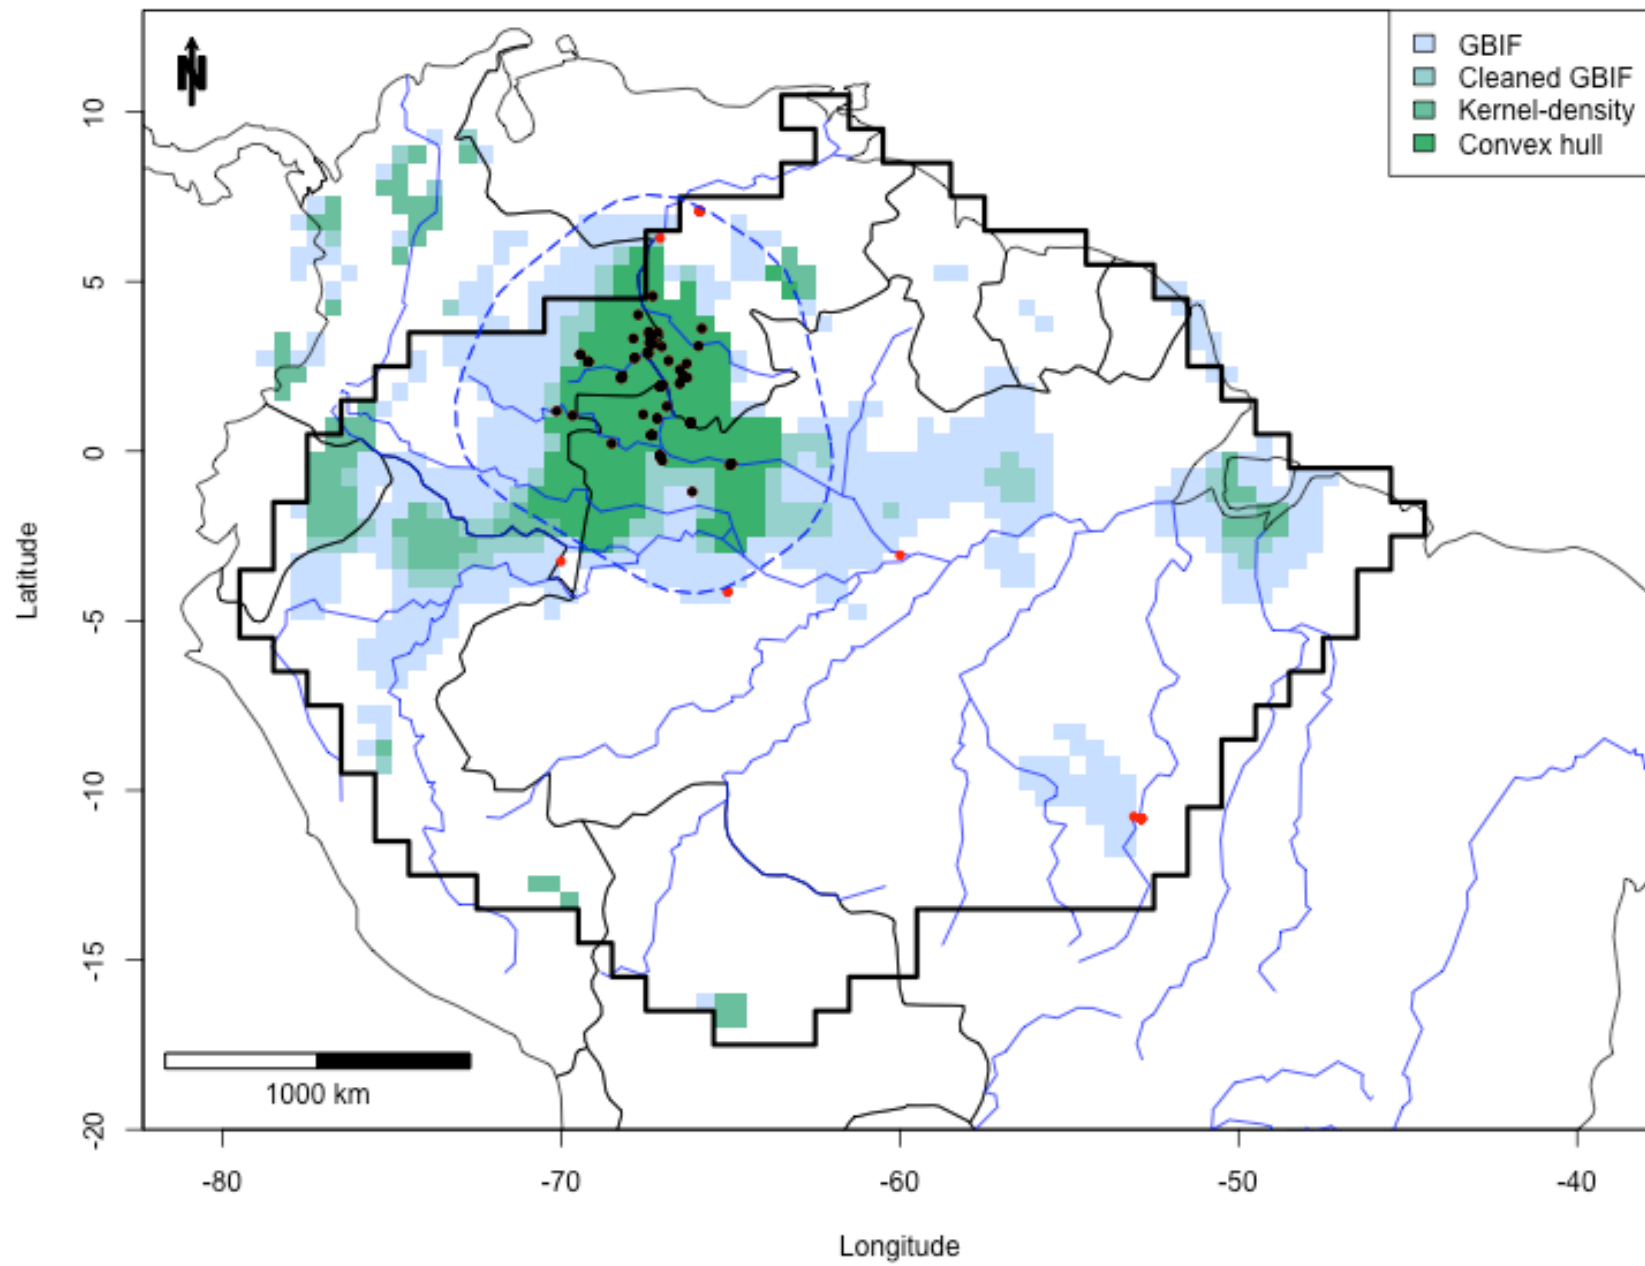

# *Erisma uncinatum*

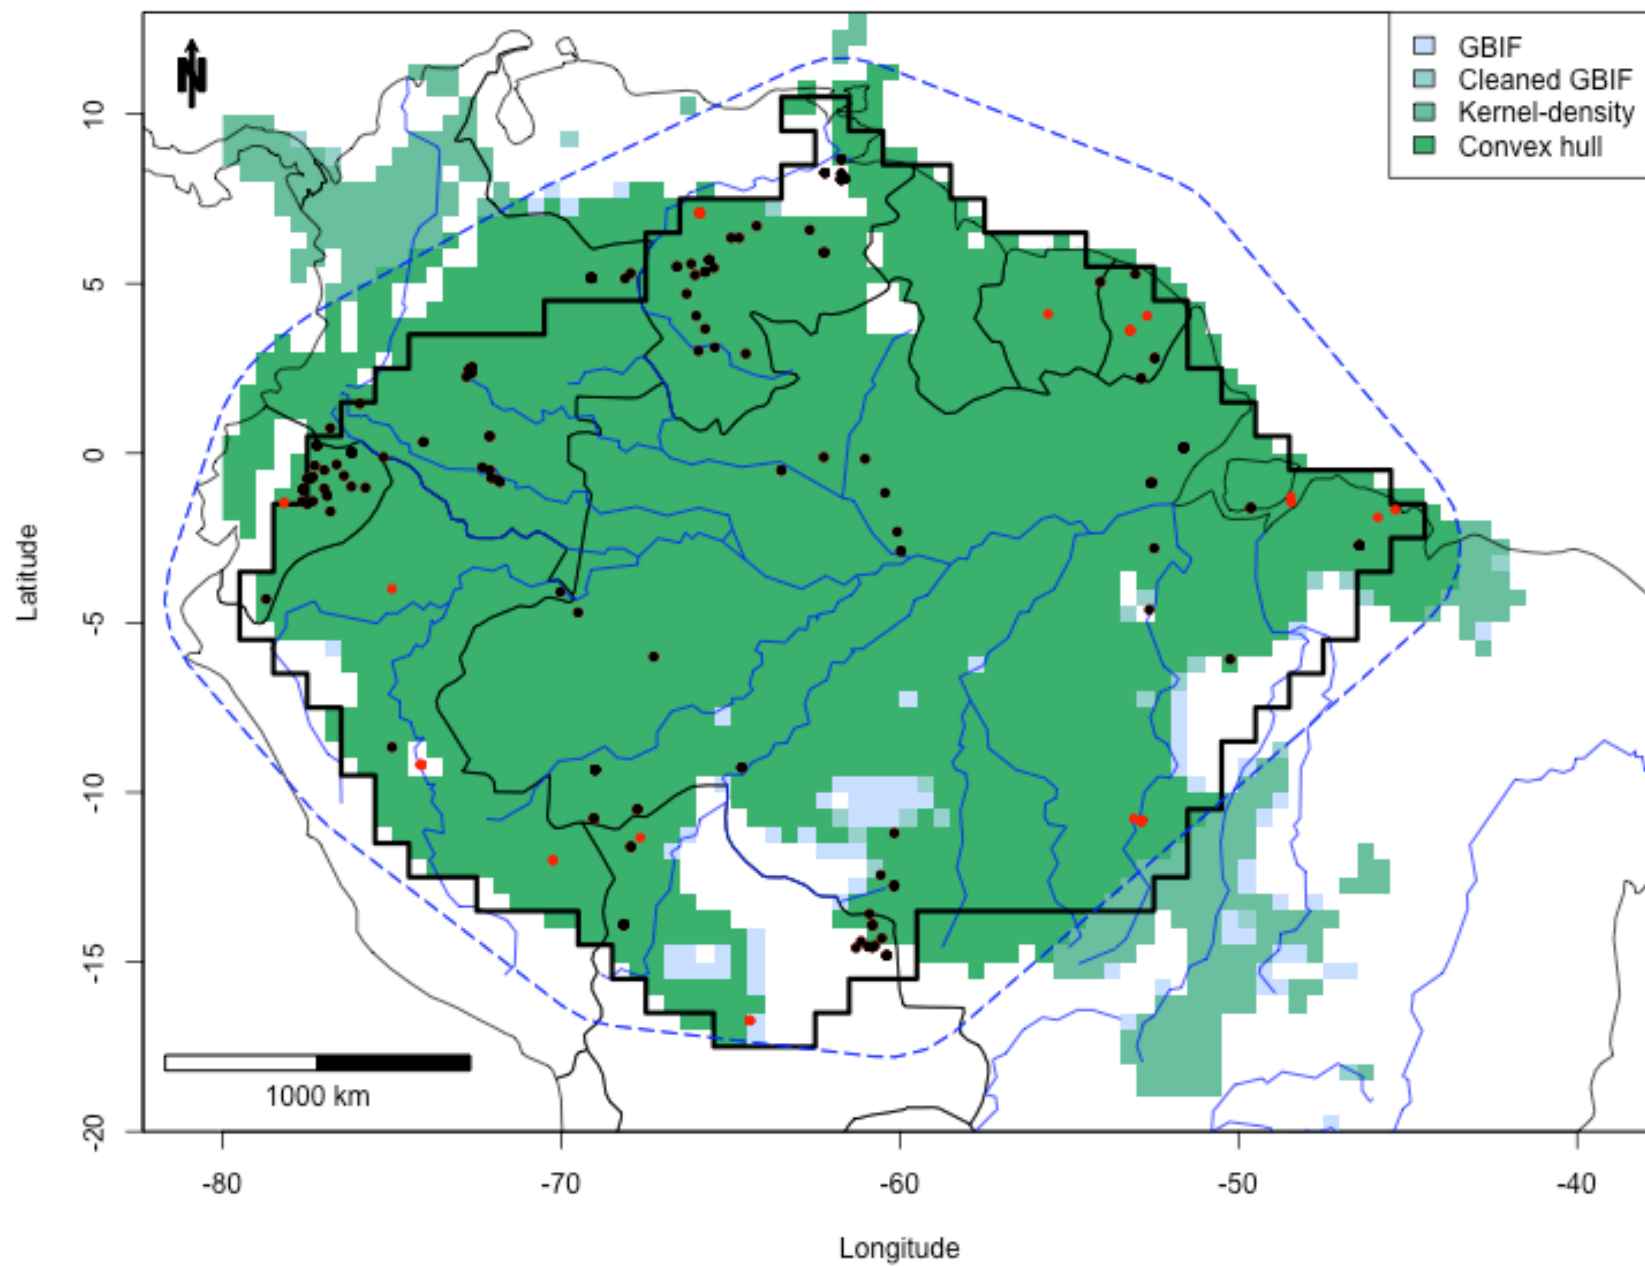



# Eschweilera albiflora

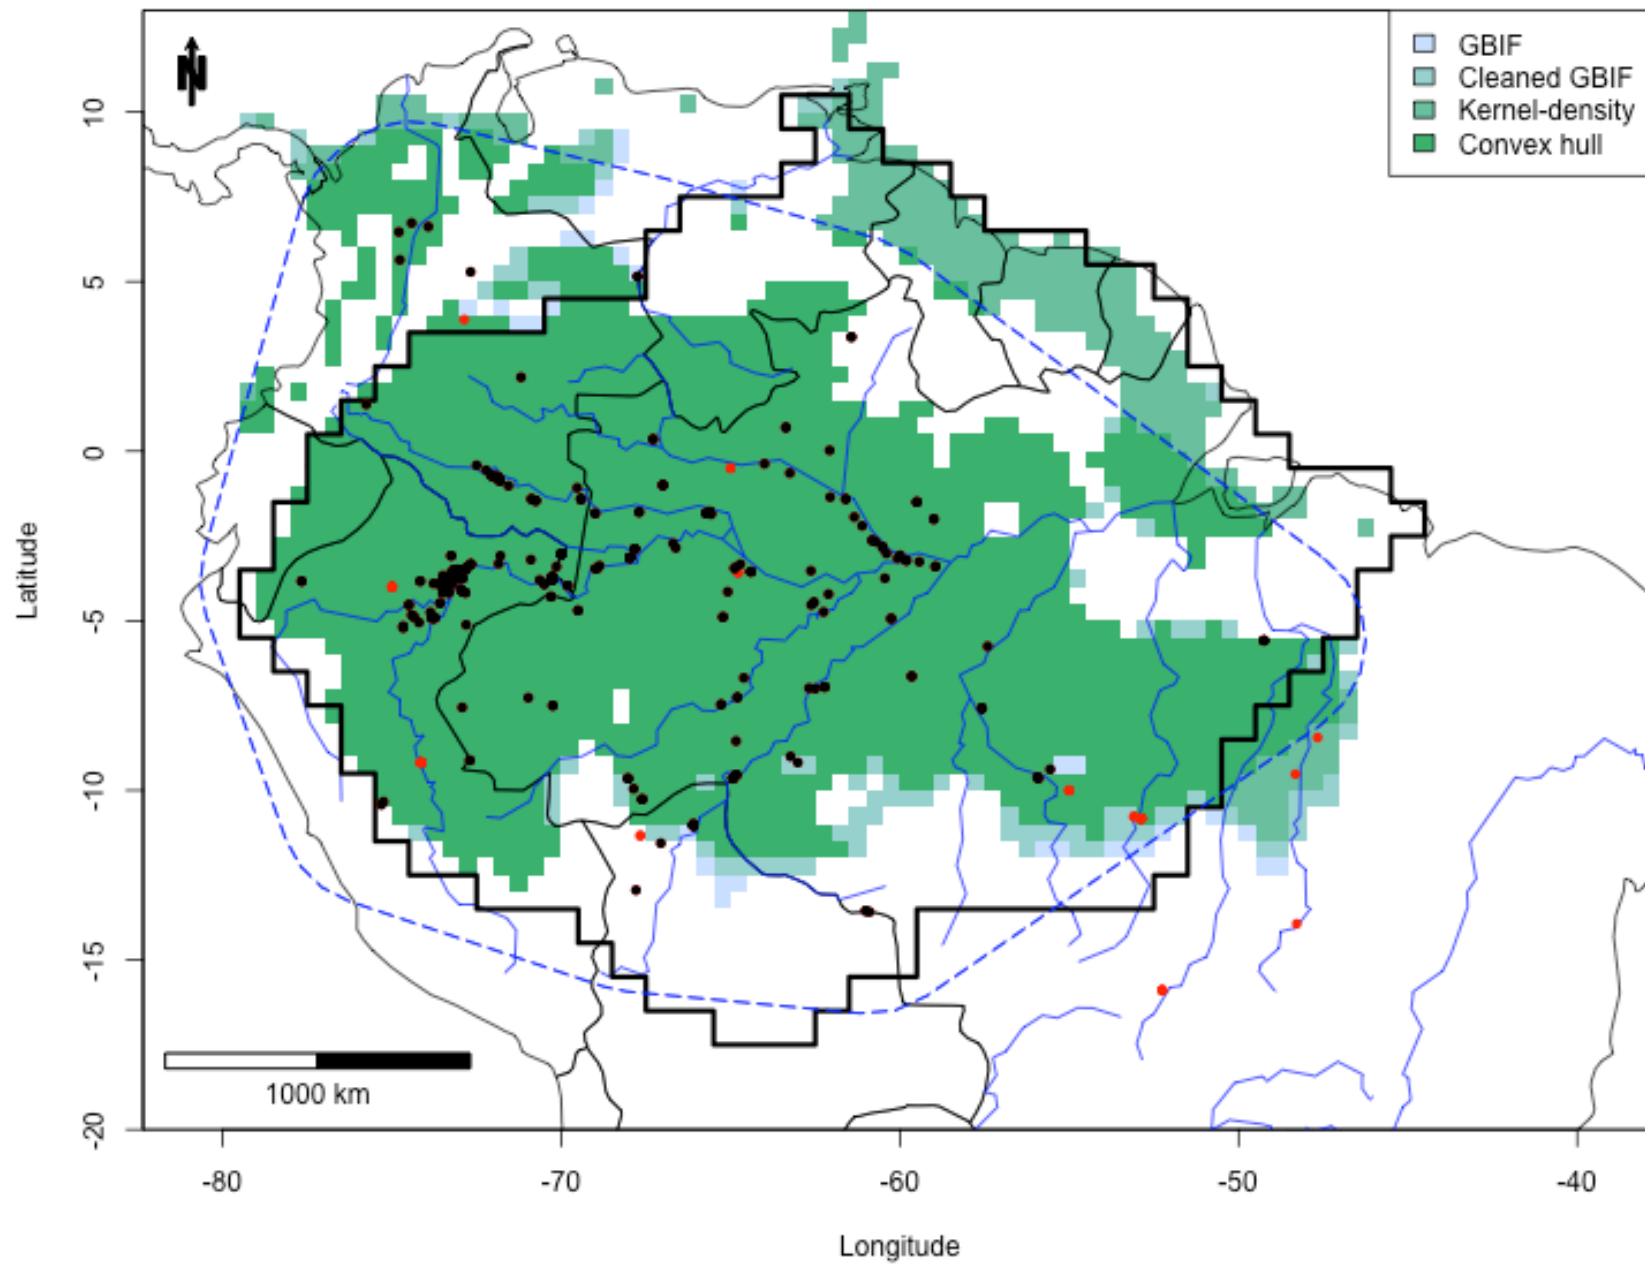

# Eschweilera amazonica

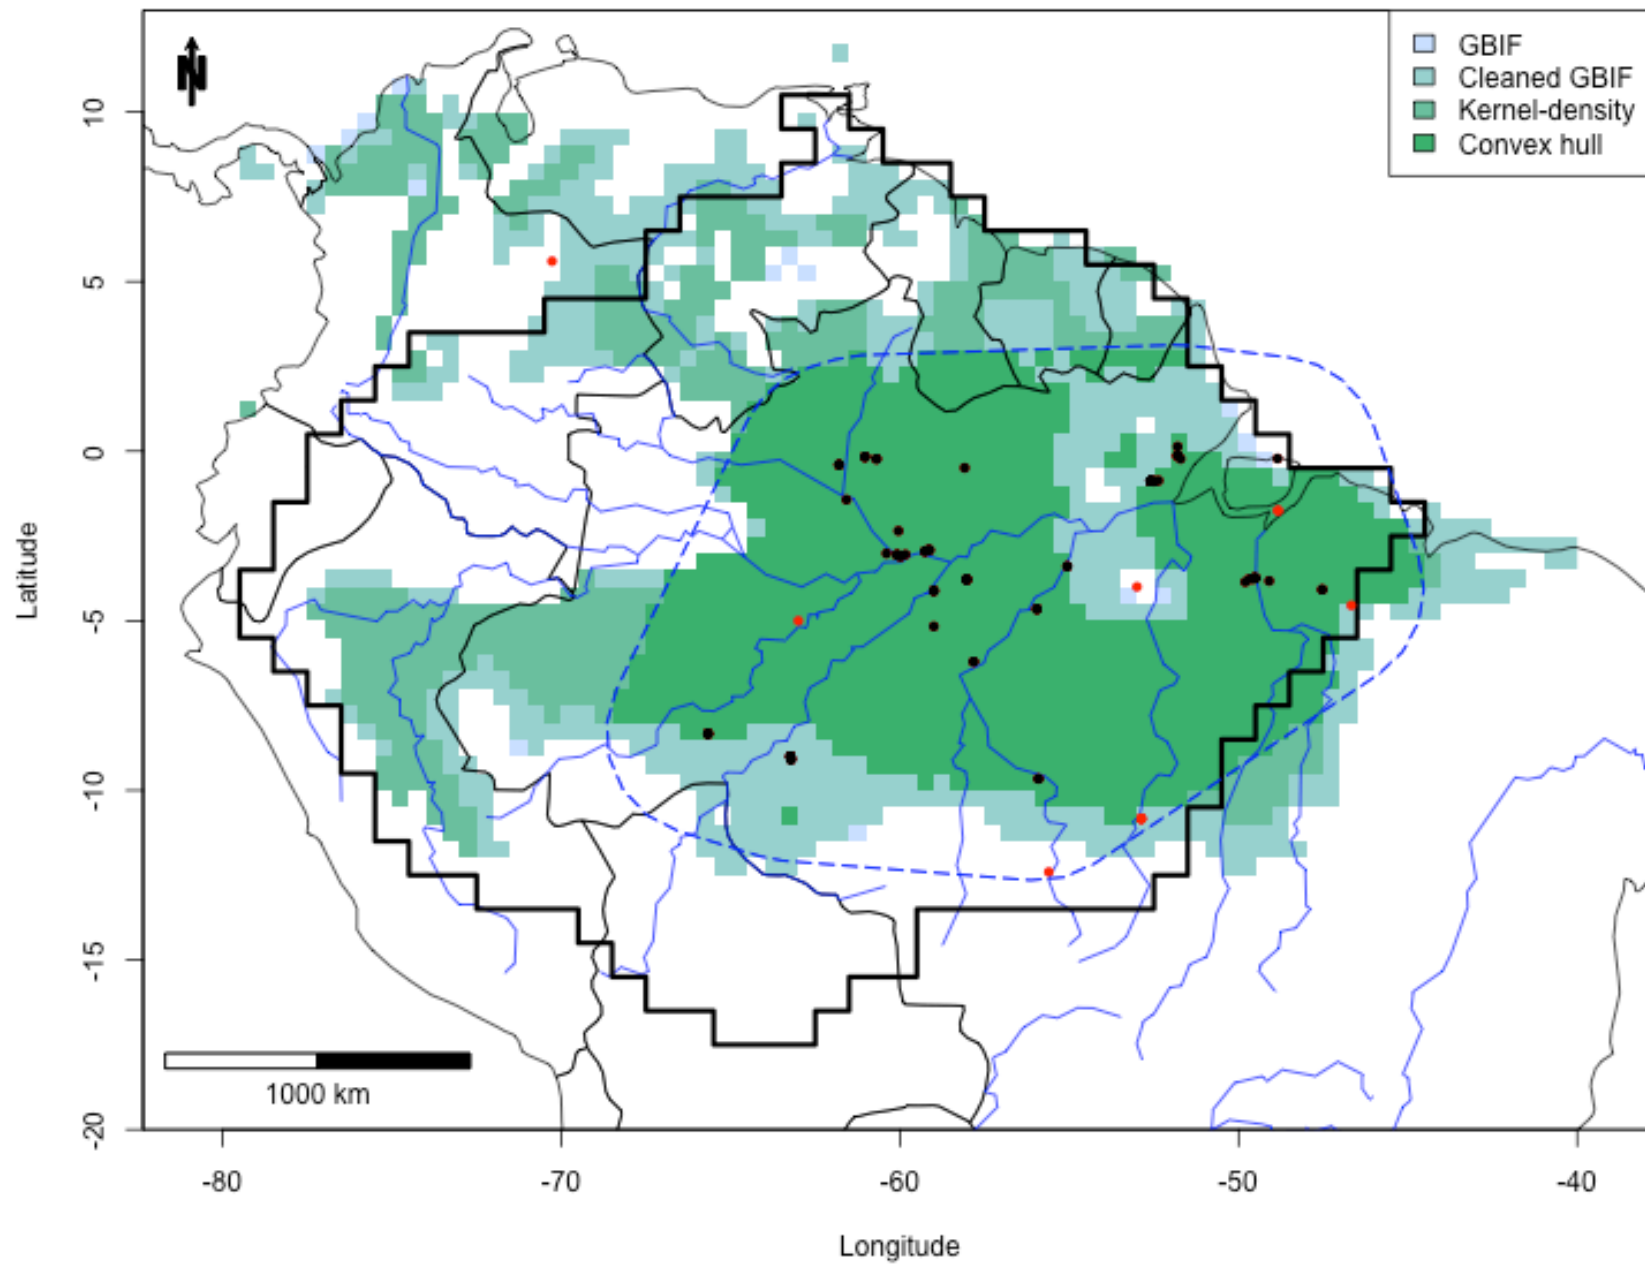

# Eschweilera atropetiolata

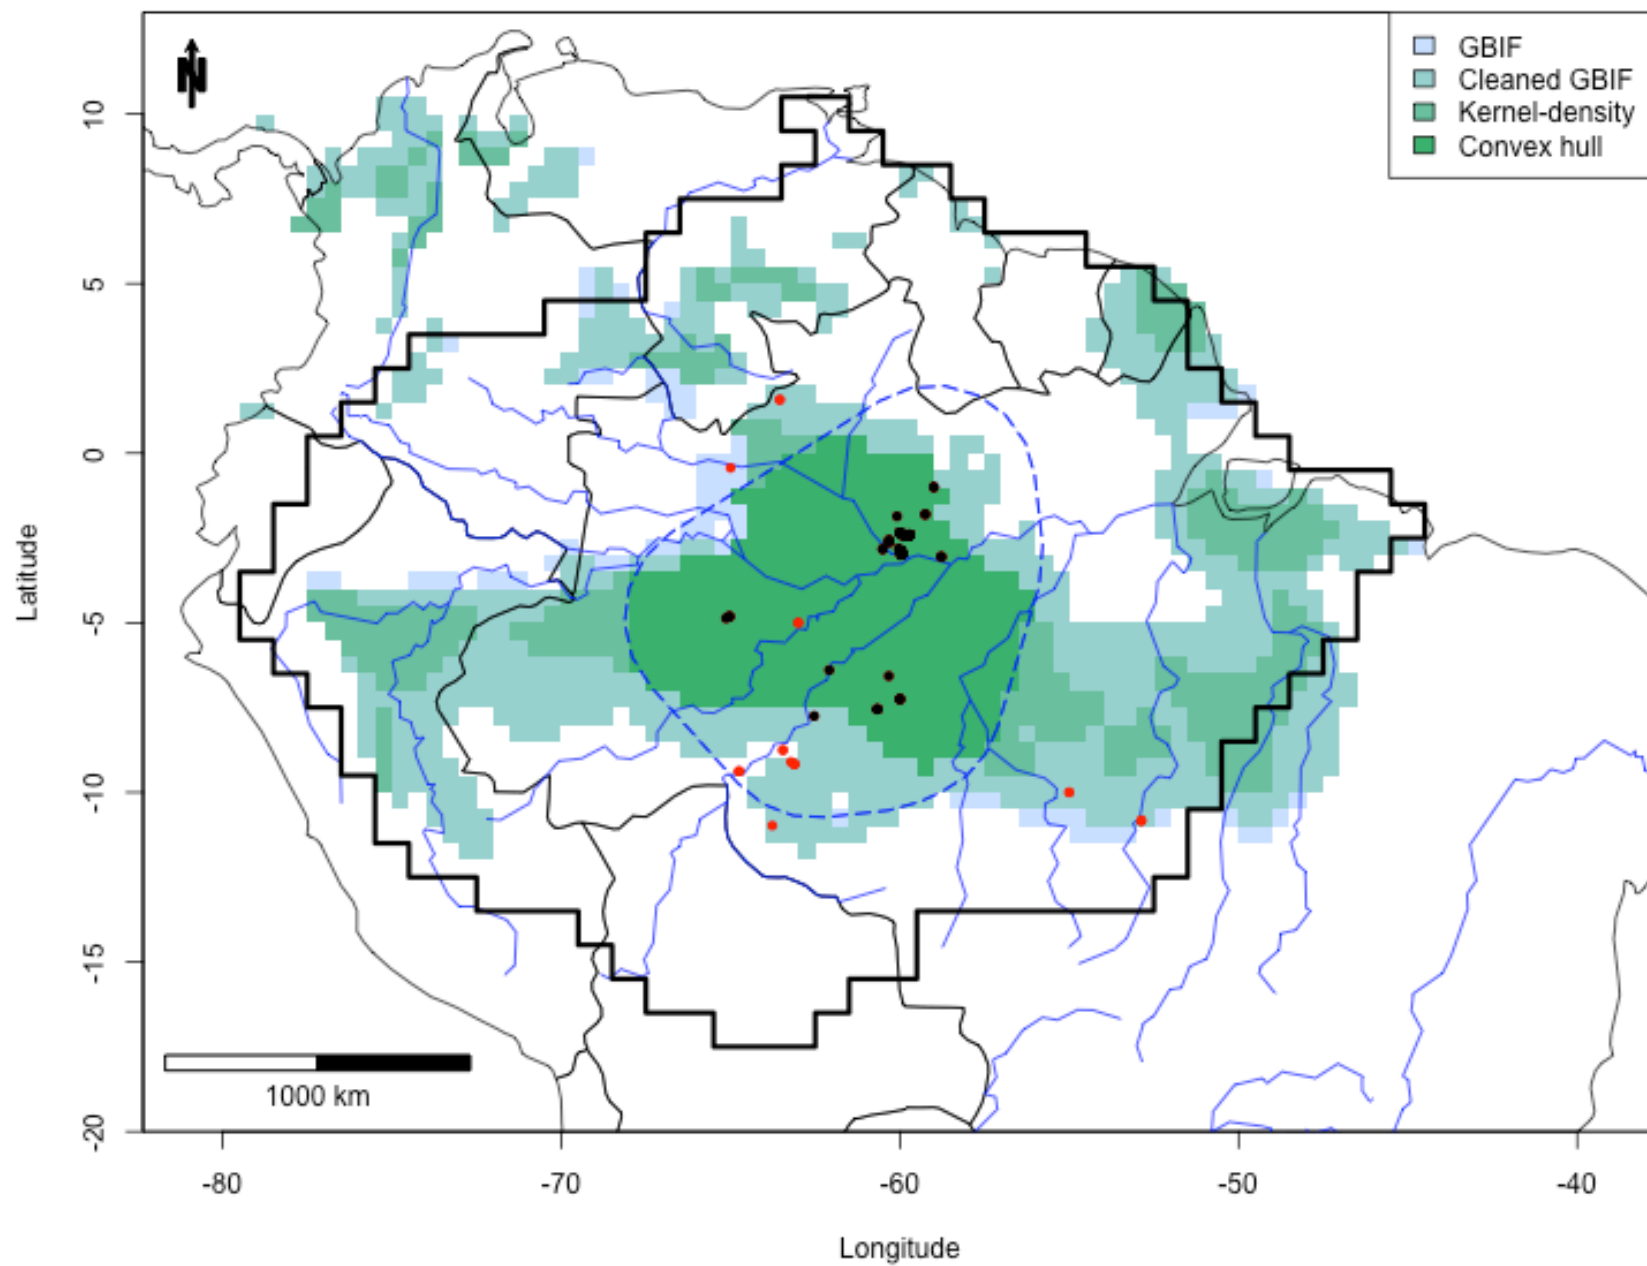

# Eschweilera bracteosa

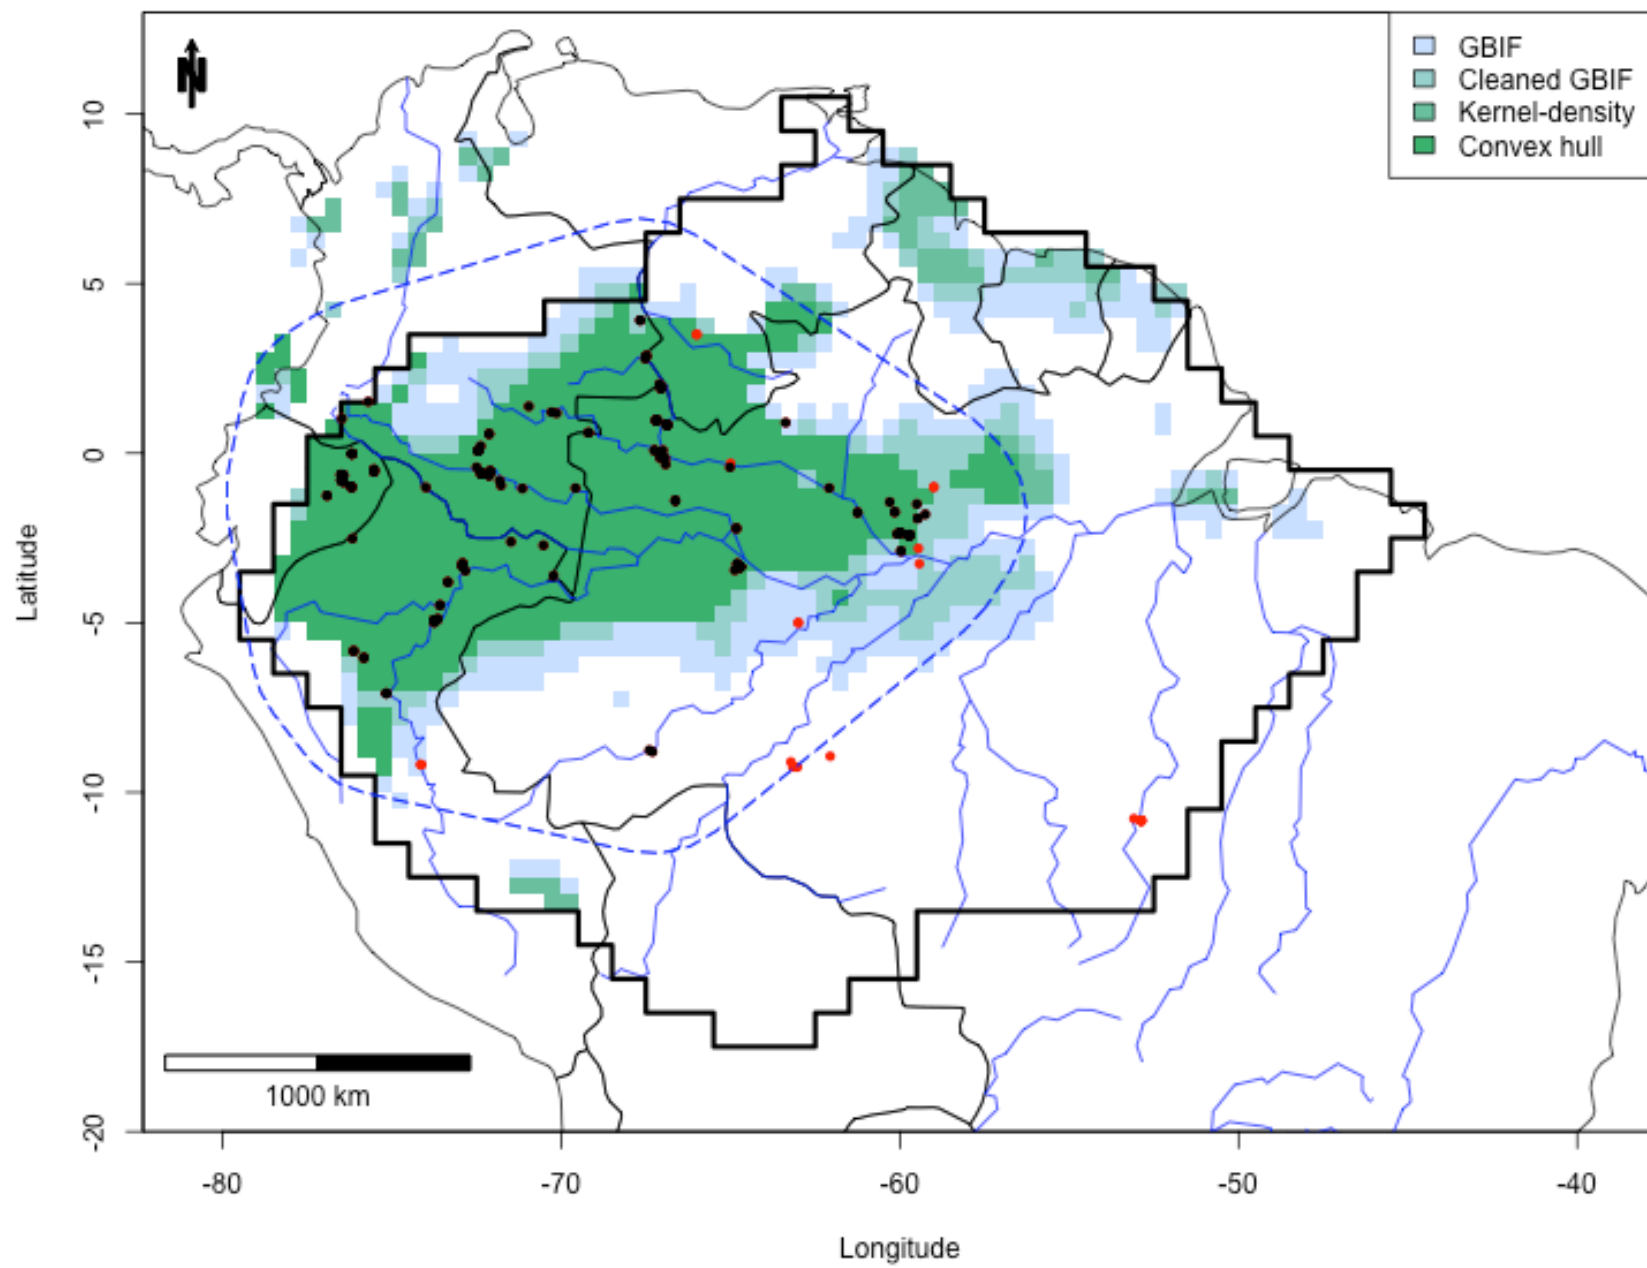

# Eschweilera coriacea

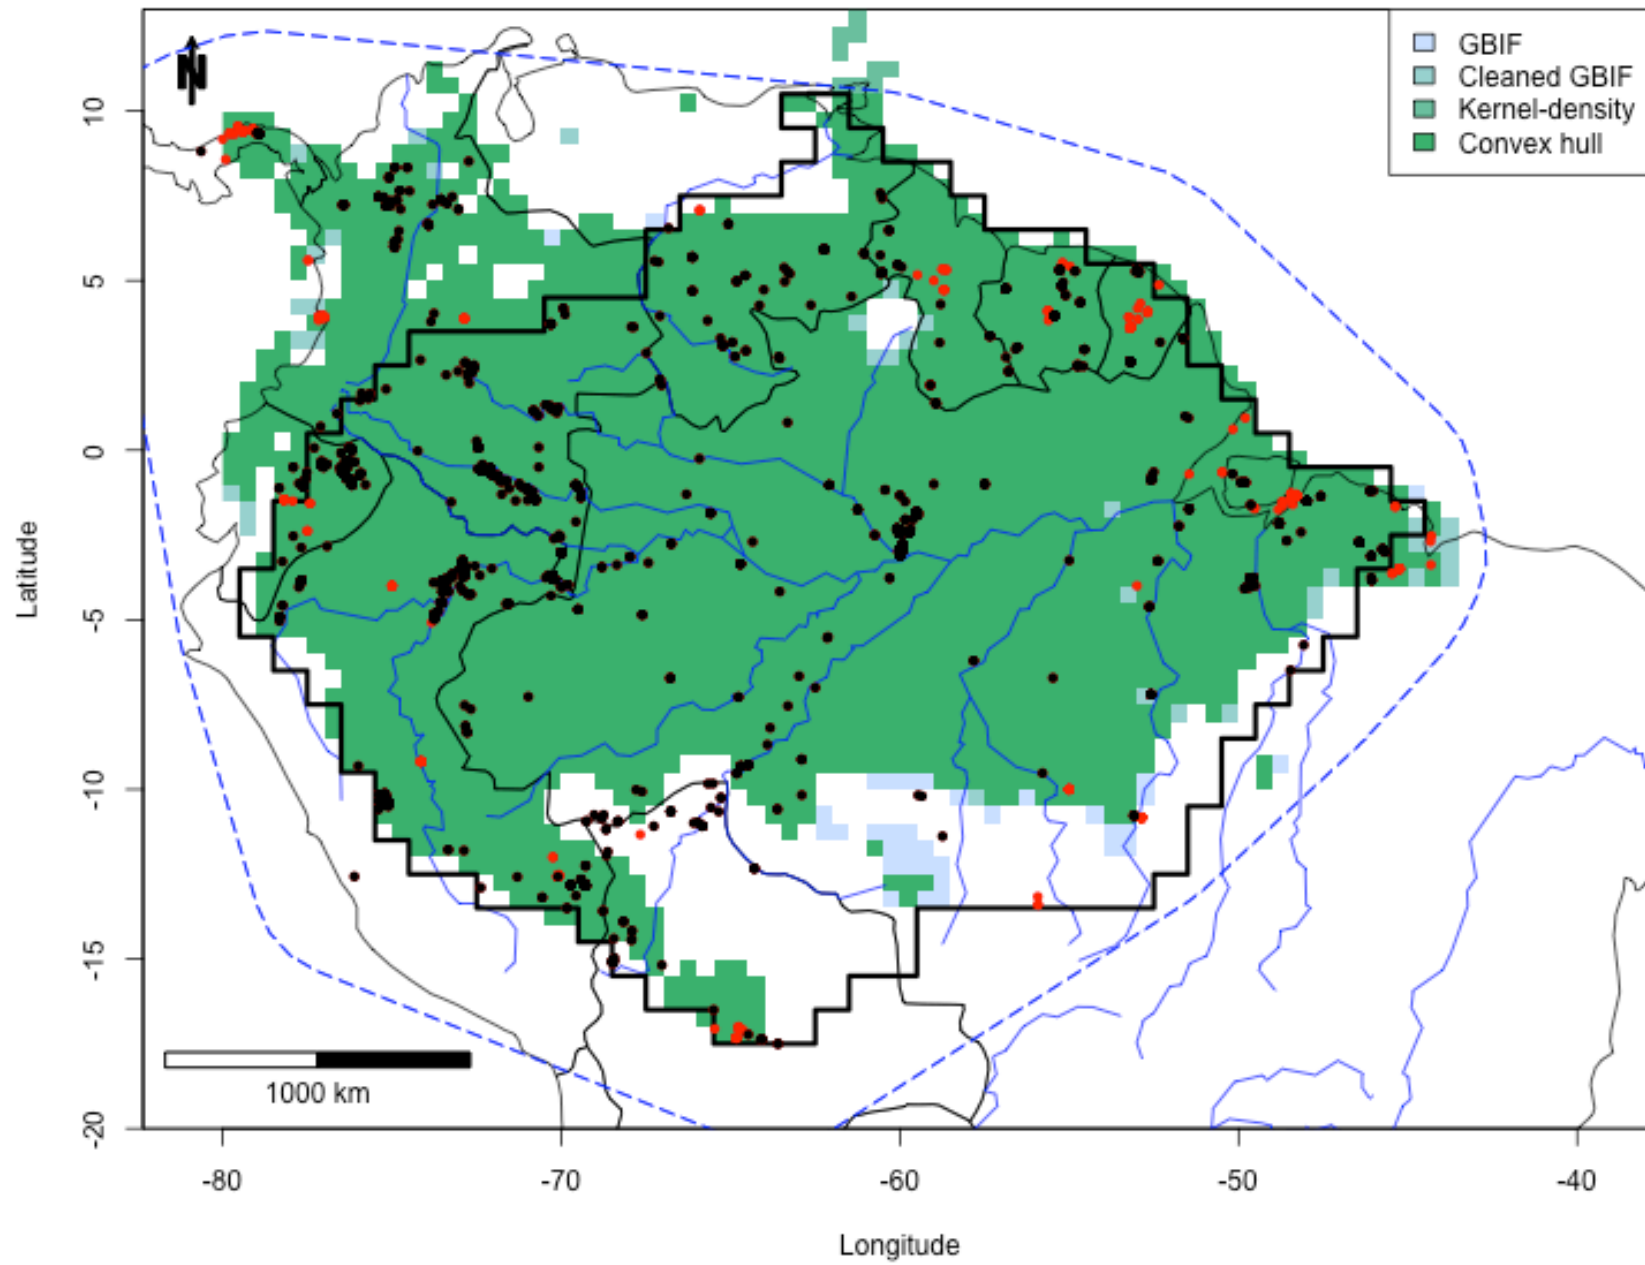

# Eschweilera decolorans

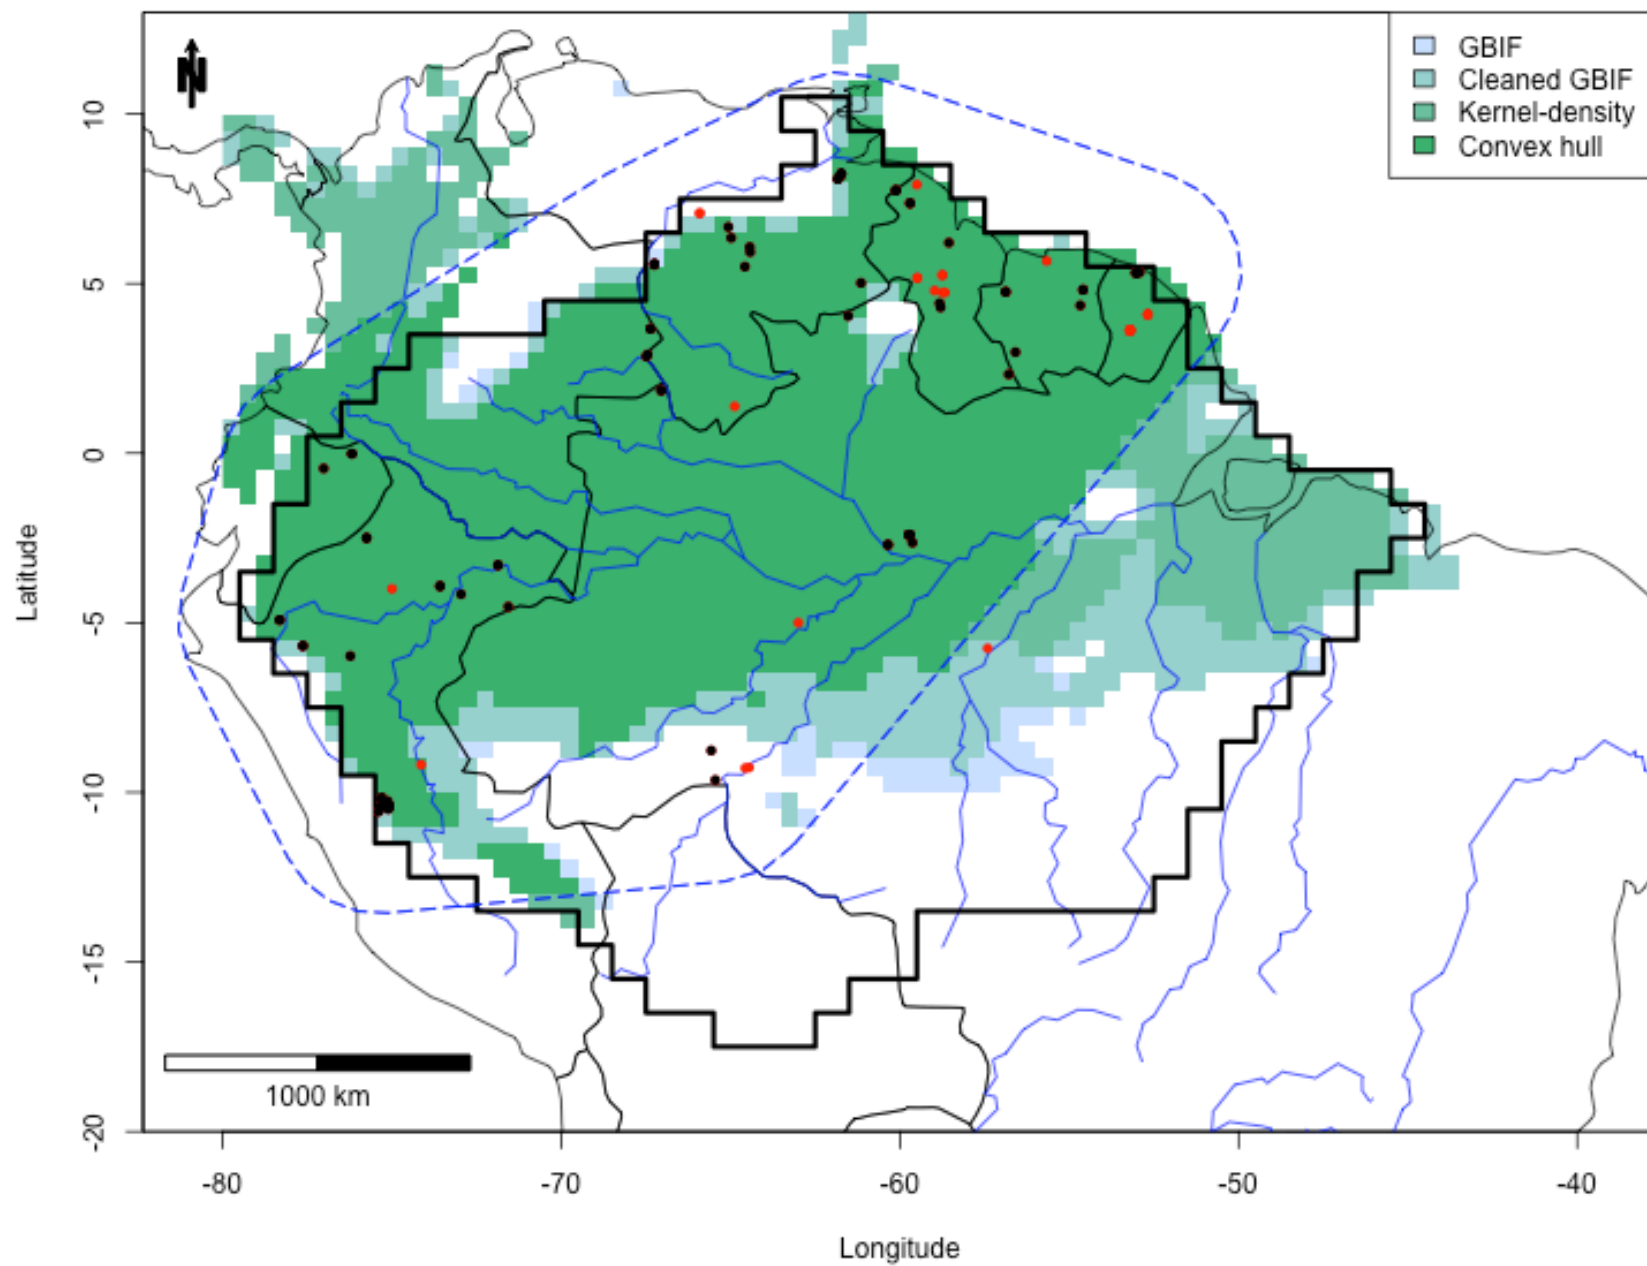

# Eschweilera grandiflora

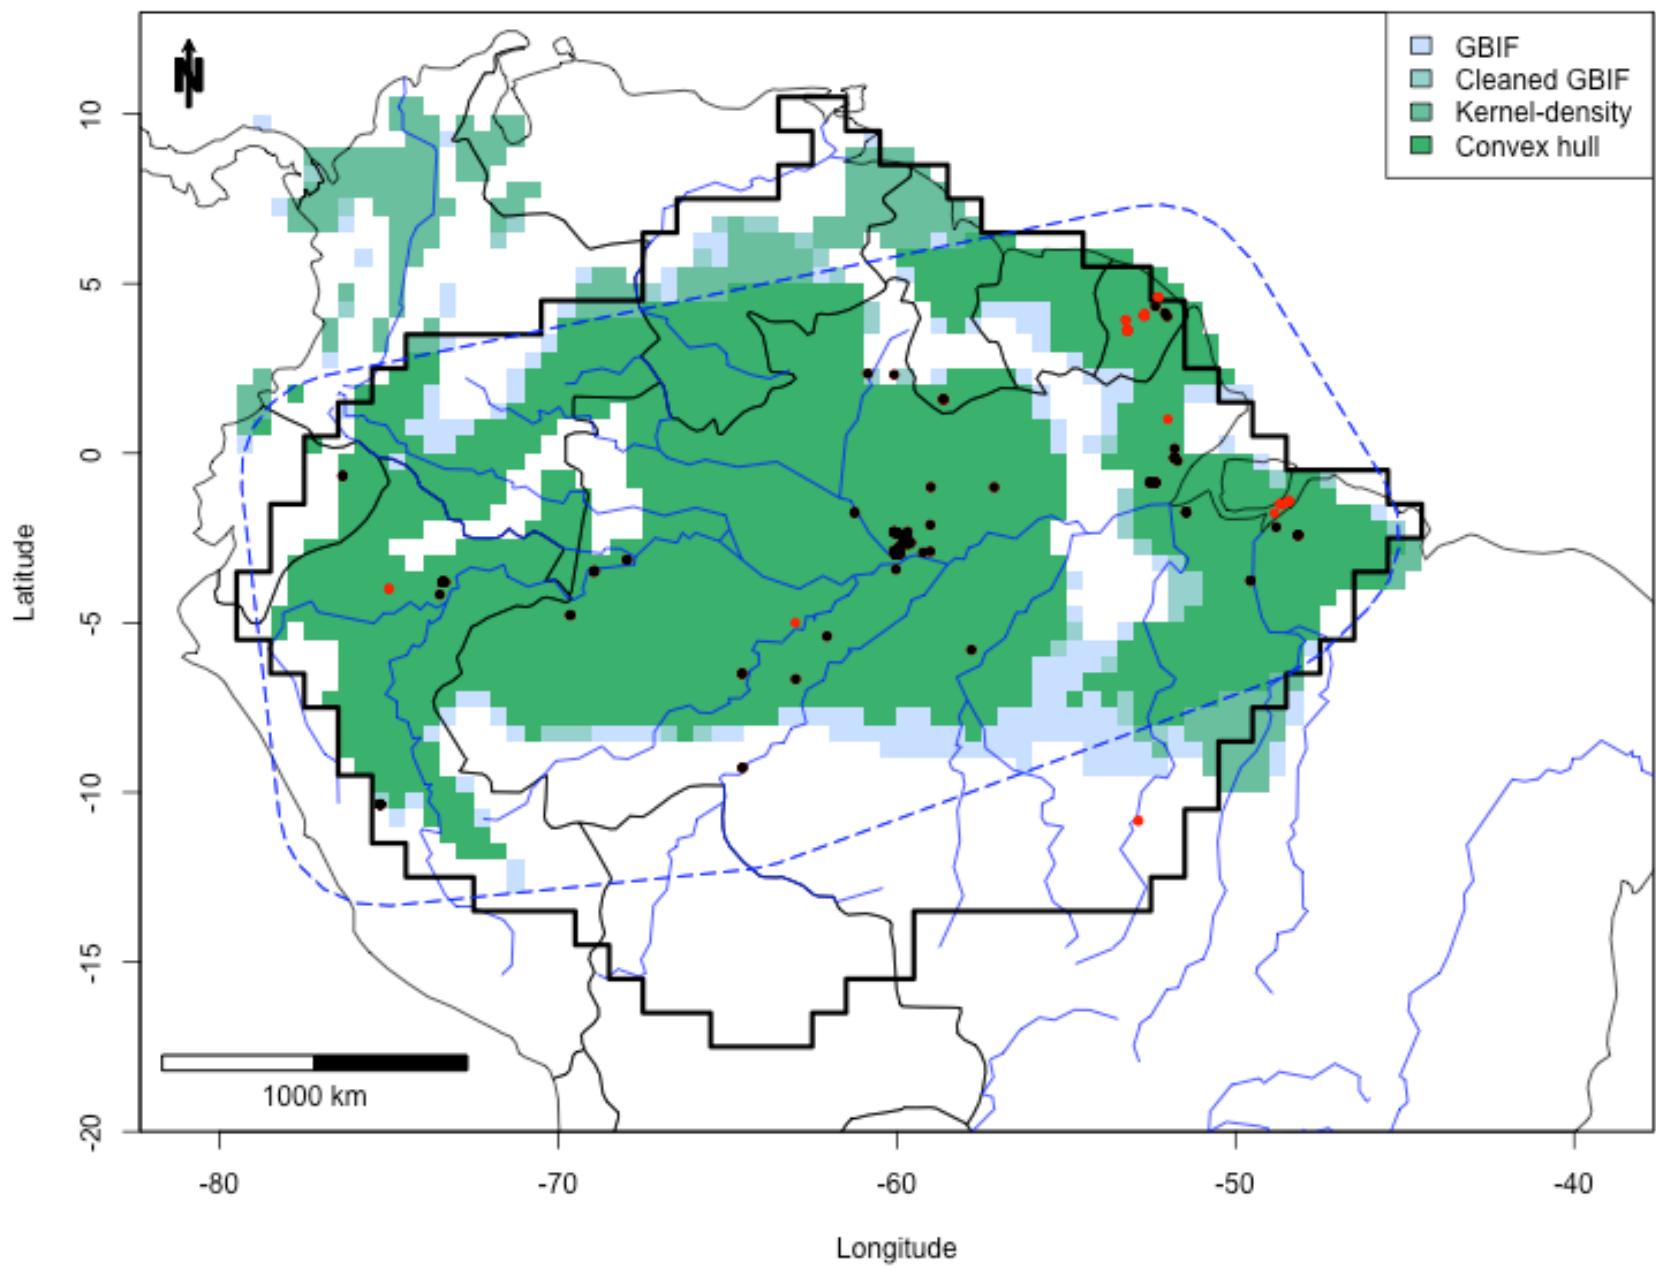

# Eschweilera parviflora

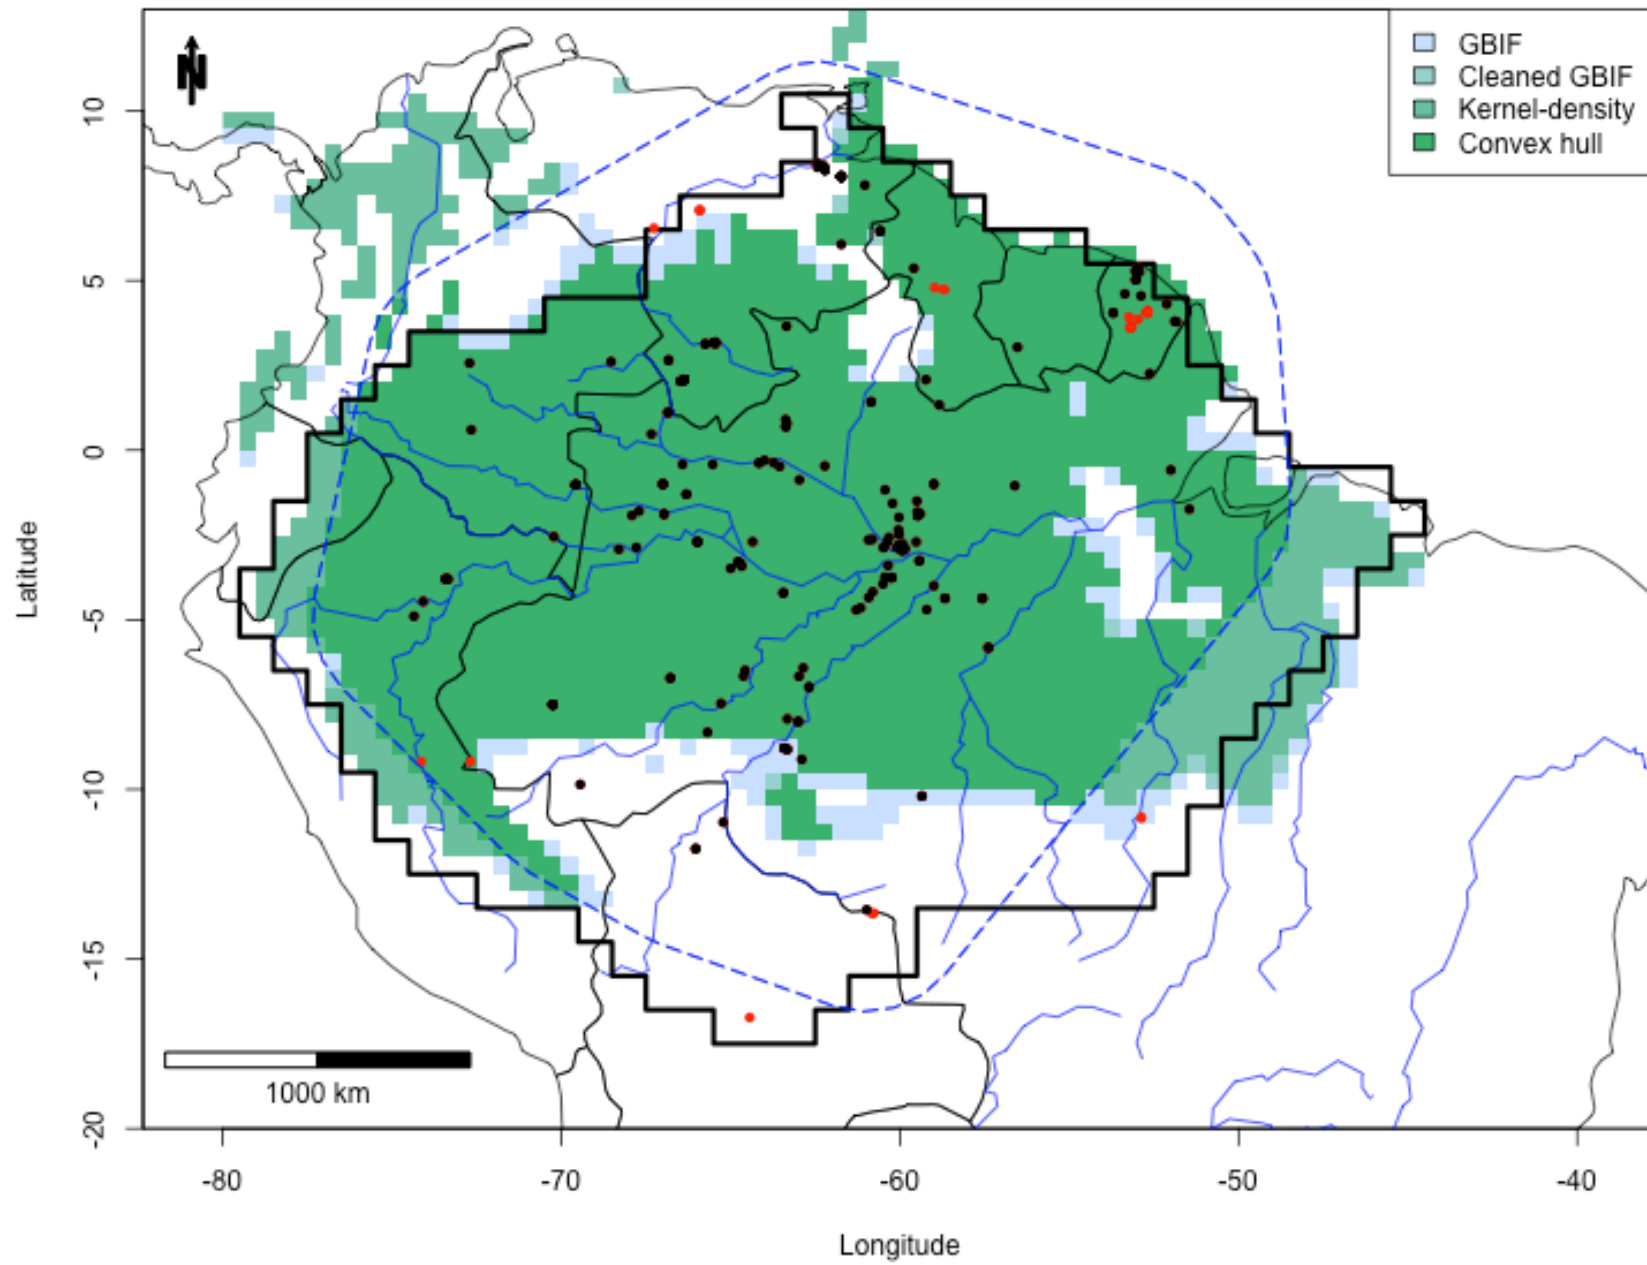



# Eschweilera parvifolia

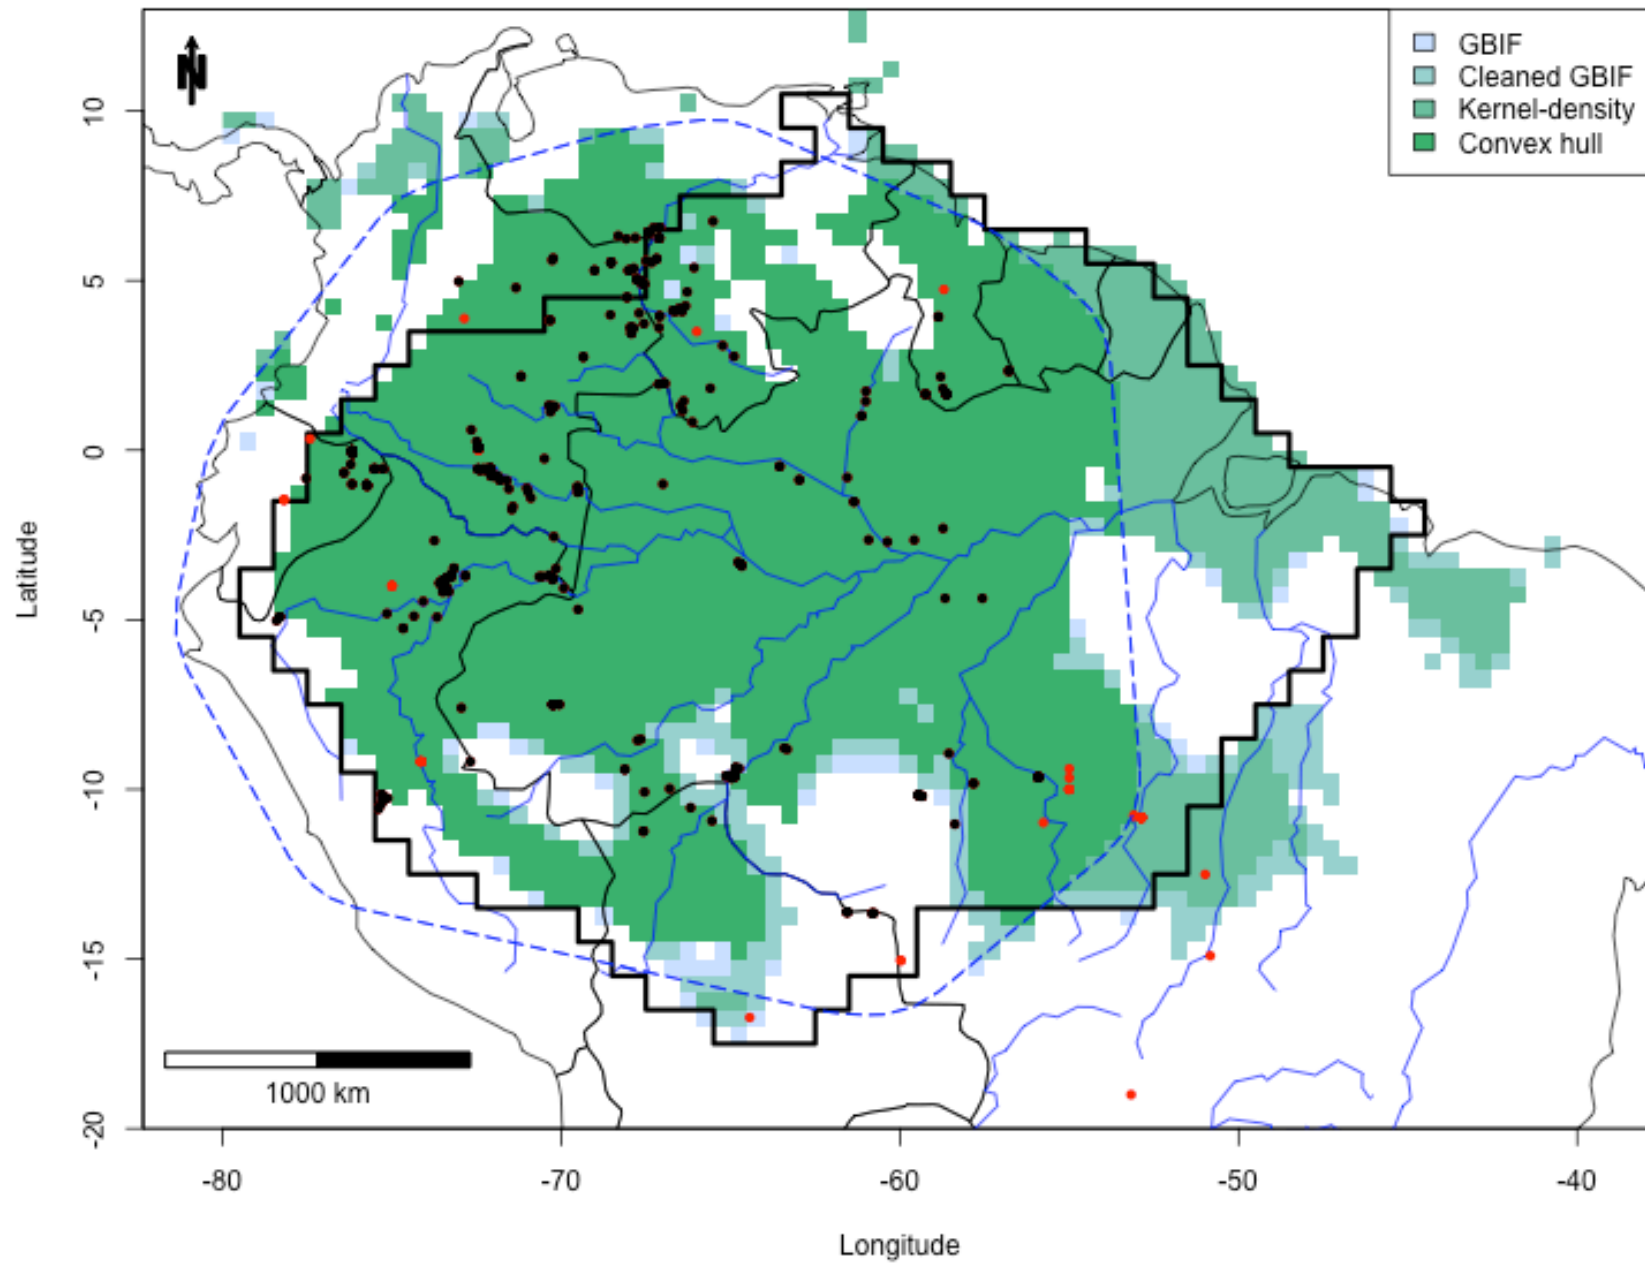

# Eschweilera pedicellata

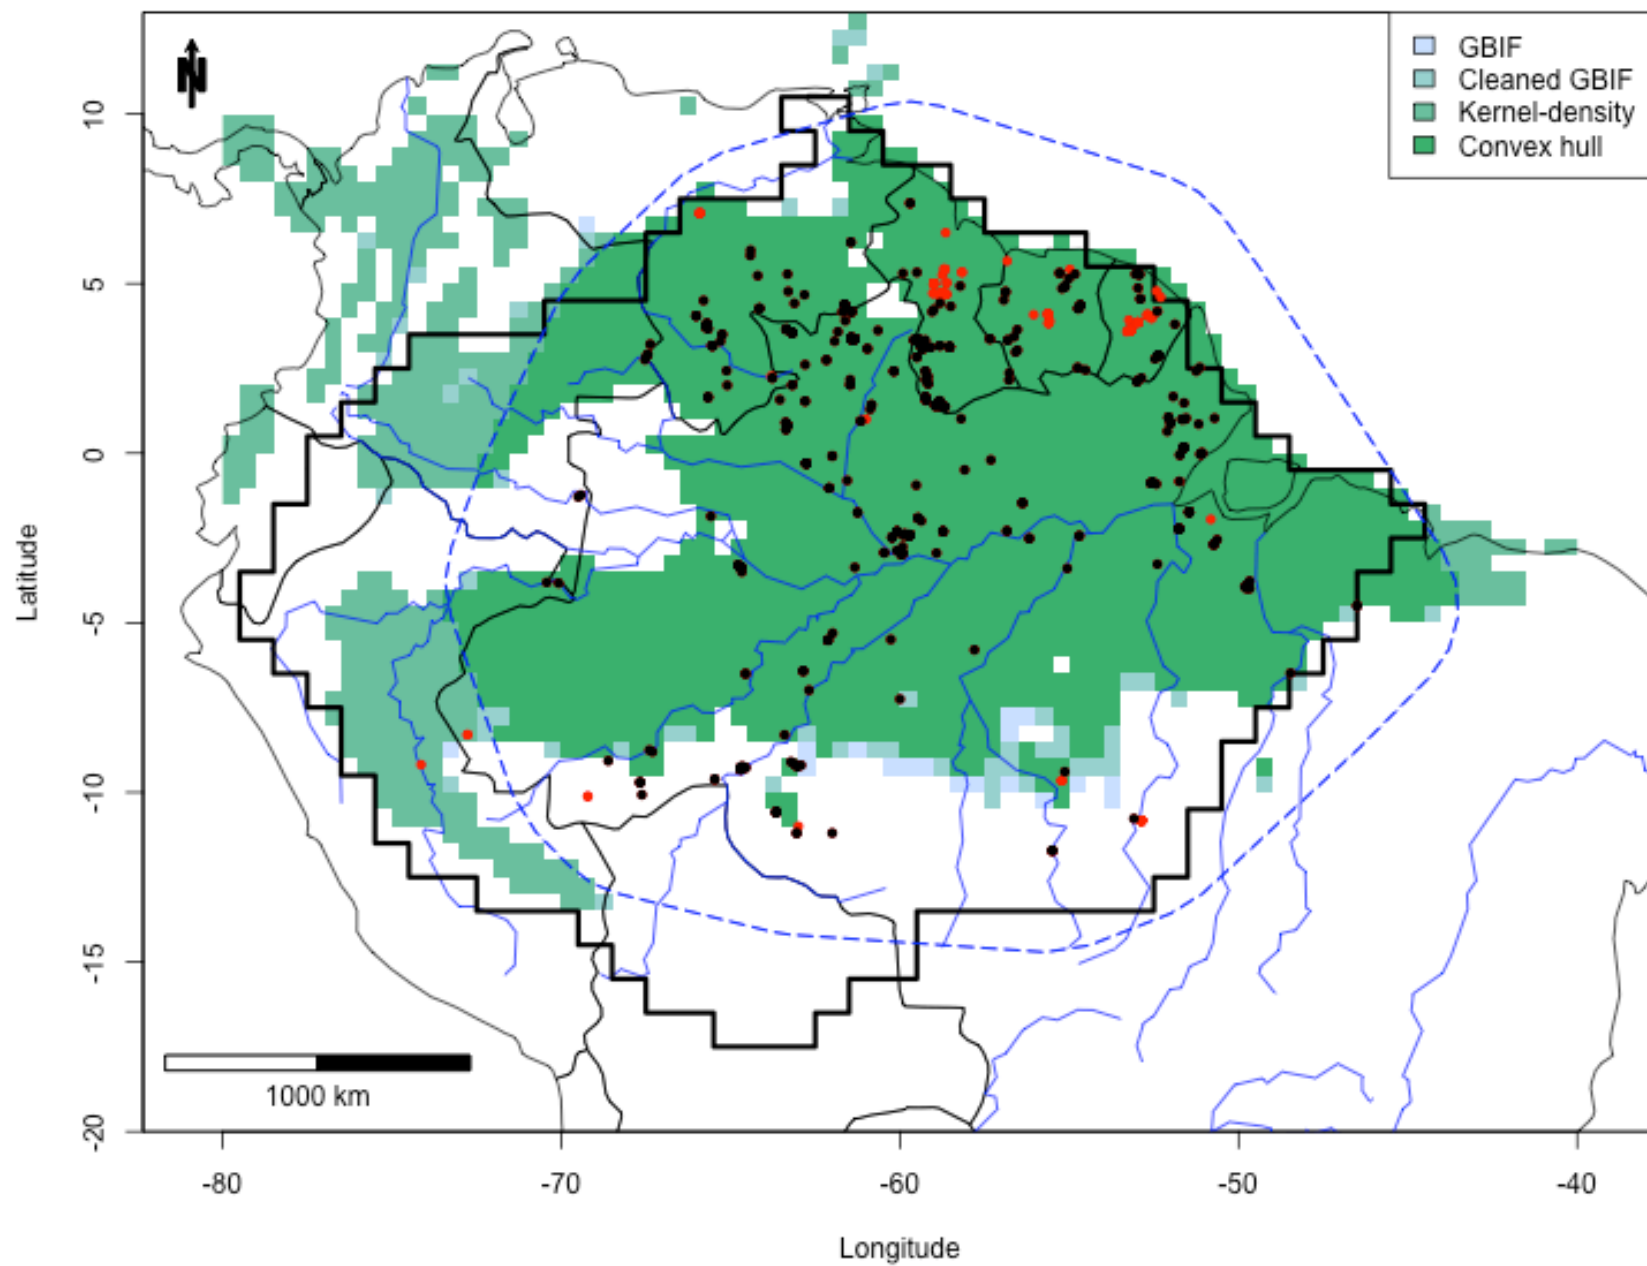

# Eschweilera sagotiana

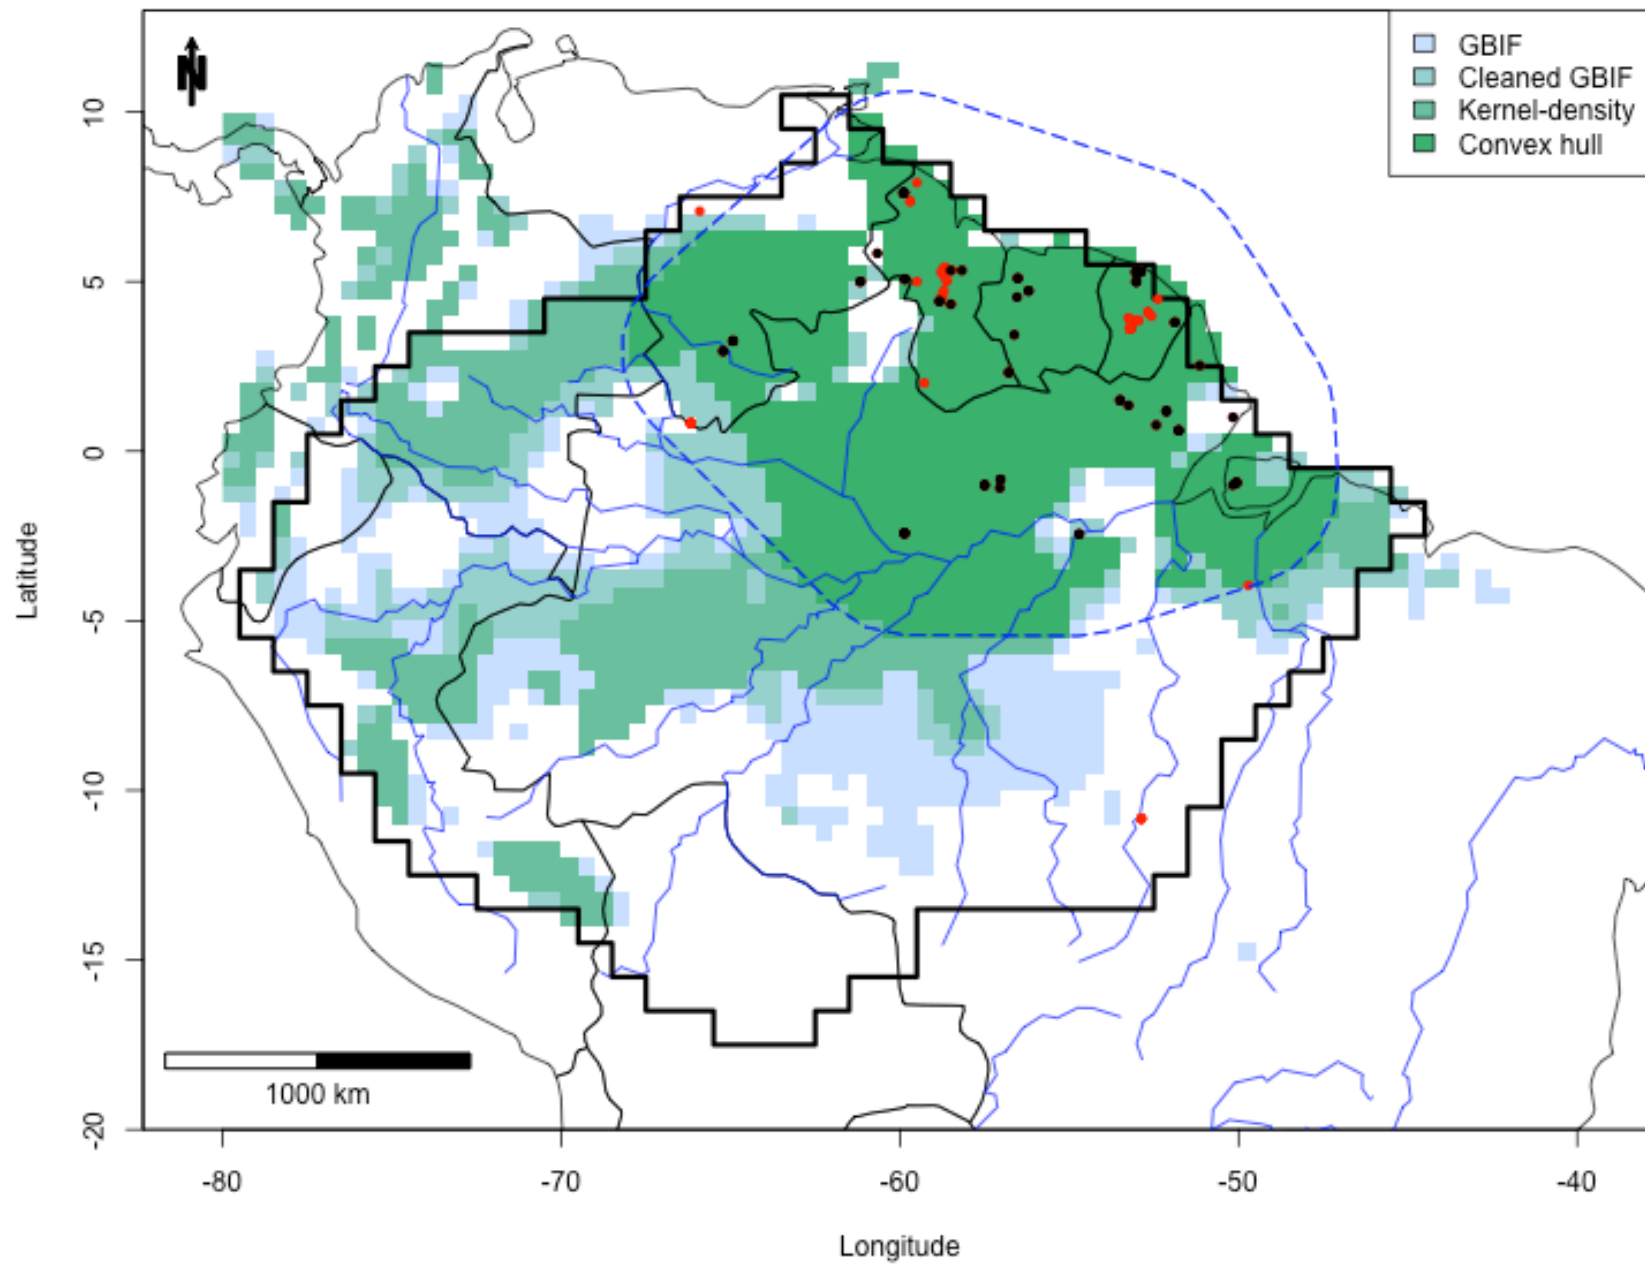

# Eschweilera tessmannii

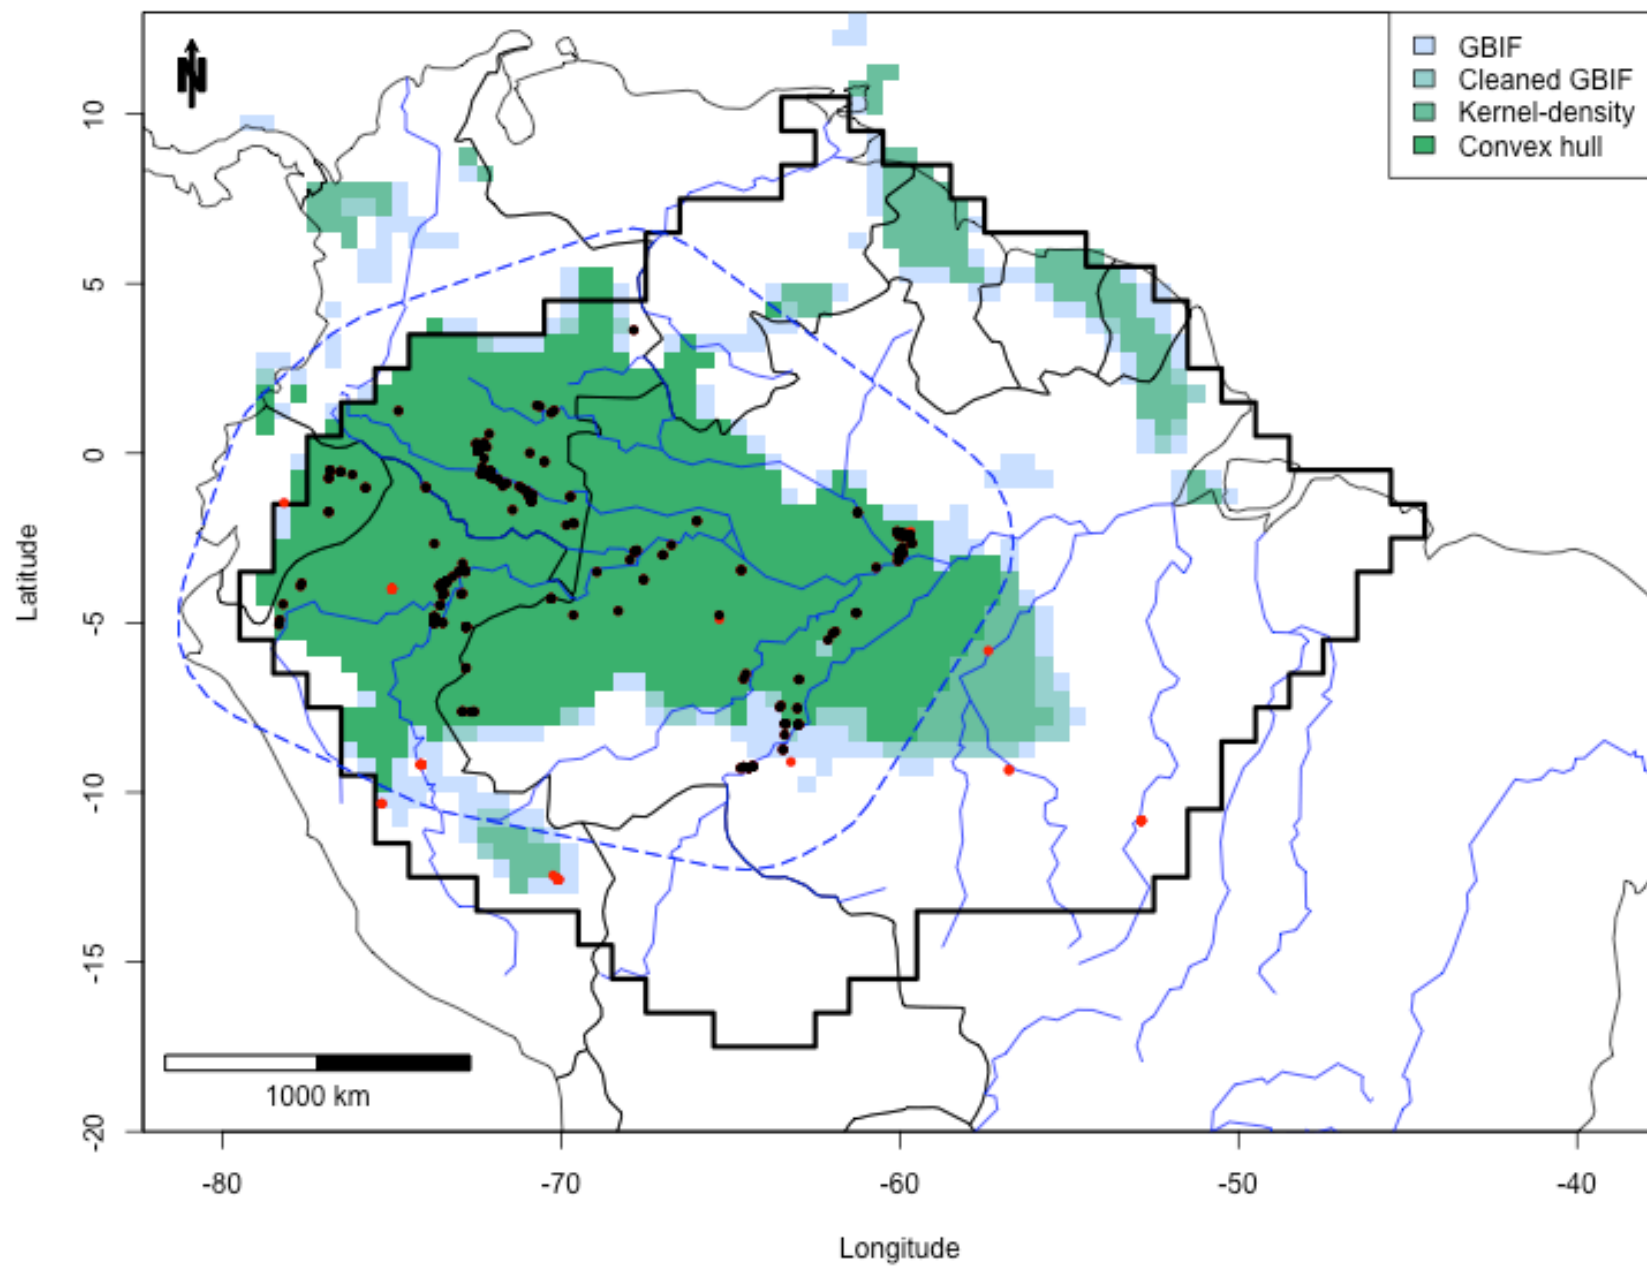

# Eschweilera truncata

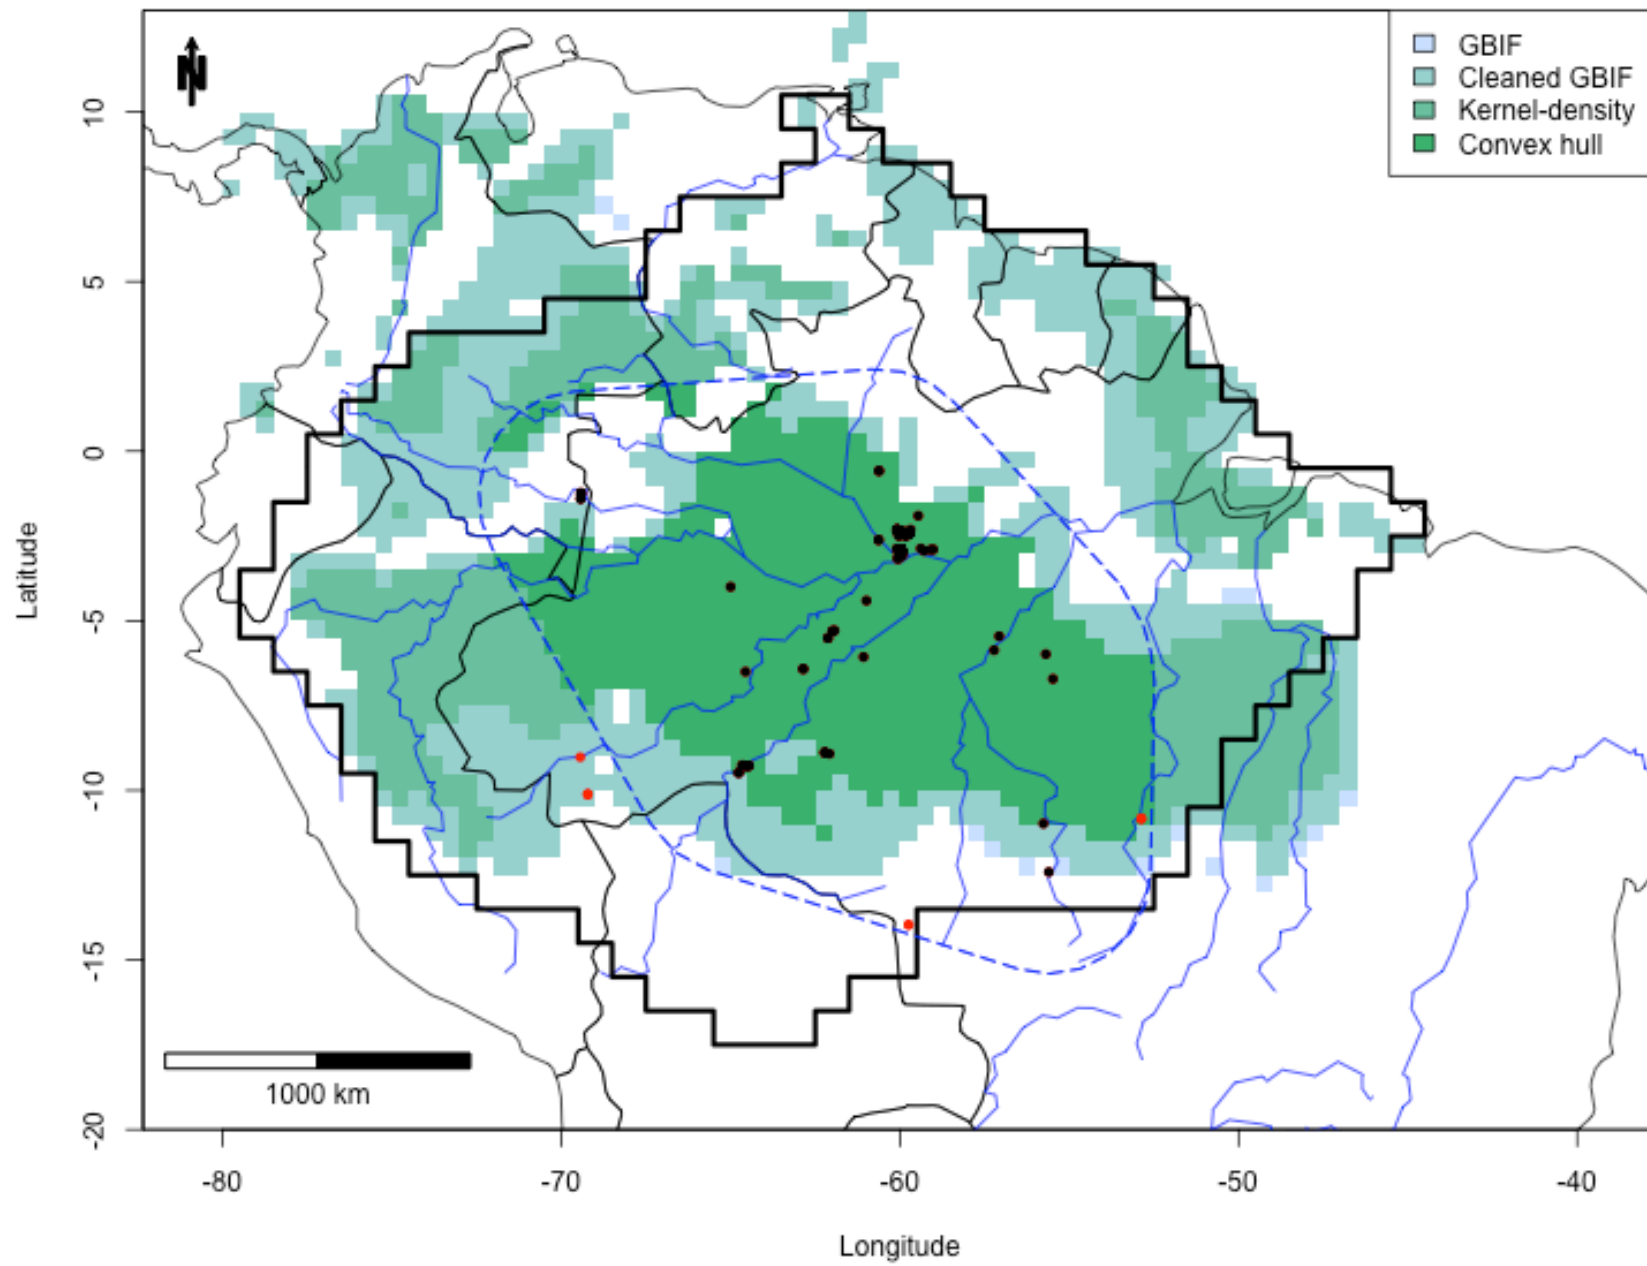

# Eschweilera wachenheimii

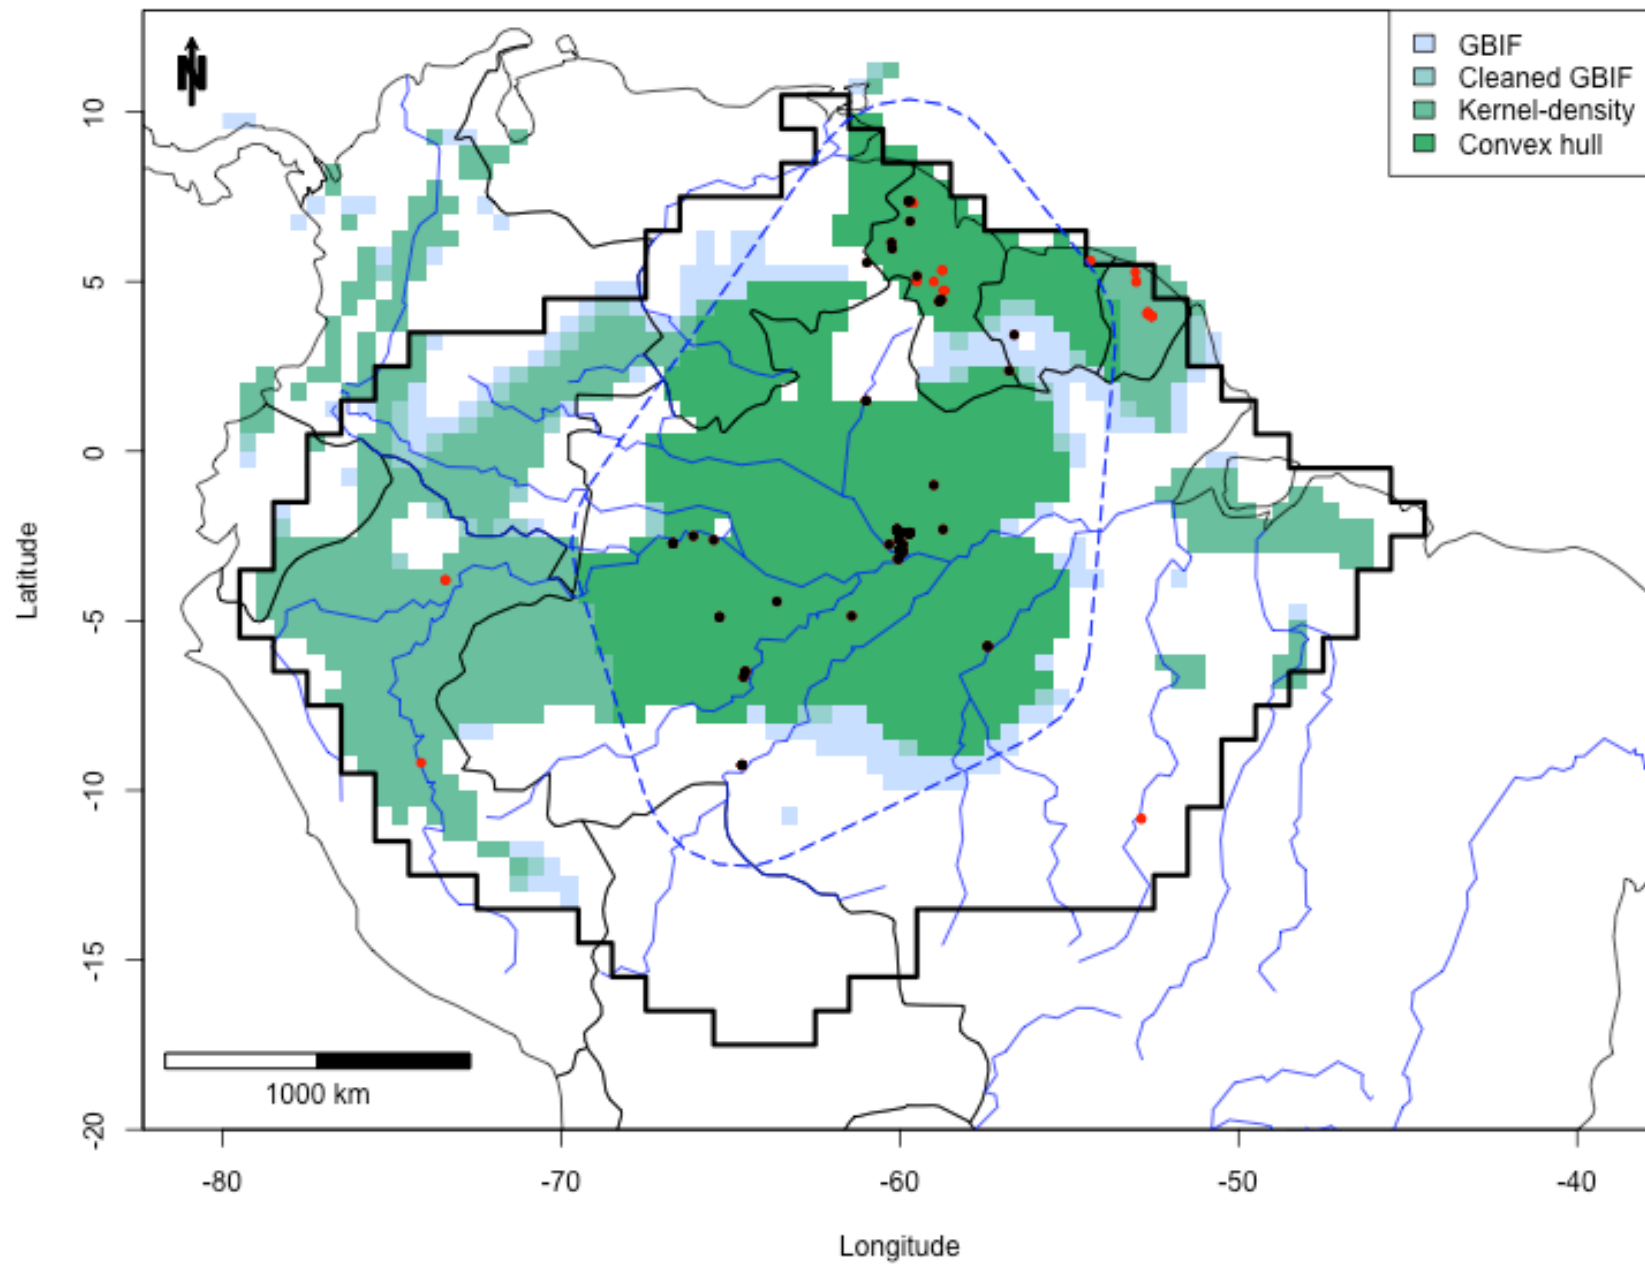

# *Euterpe oleracea*

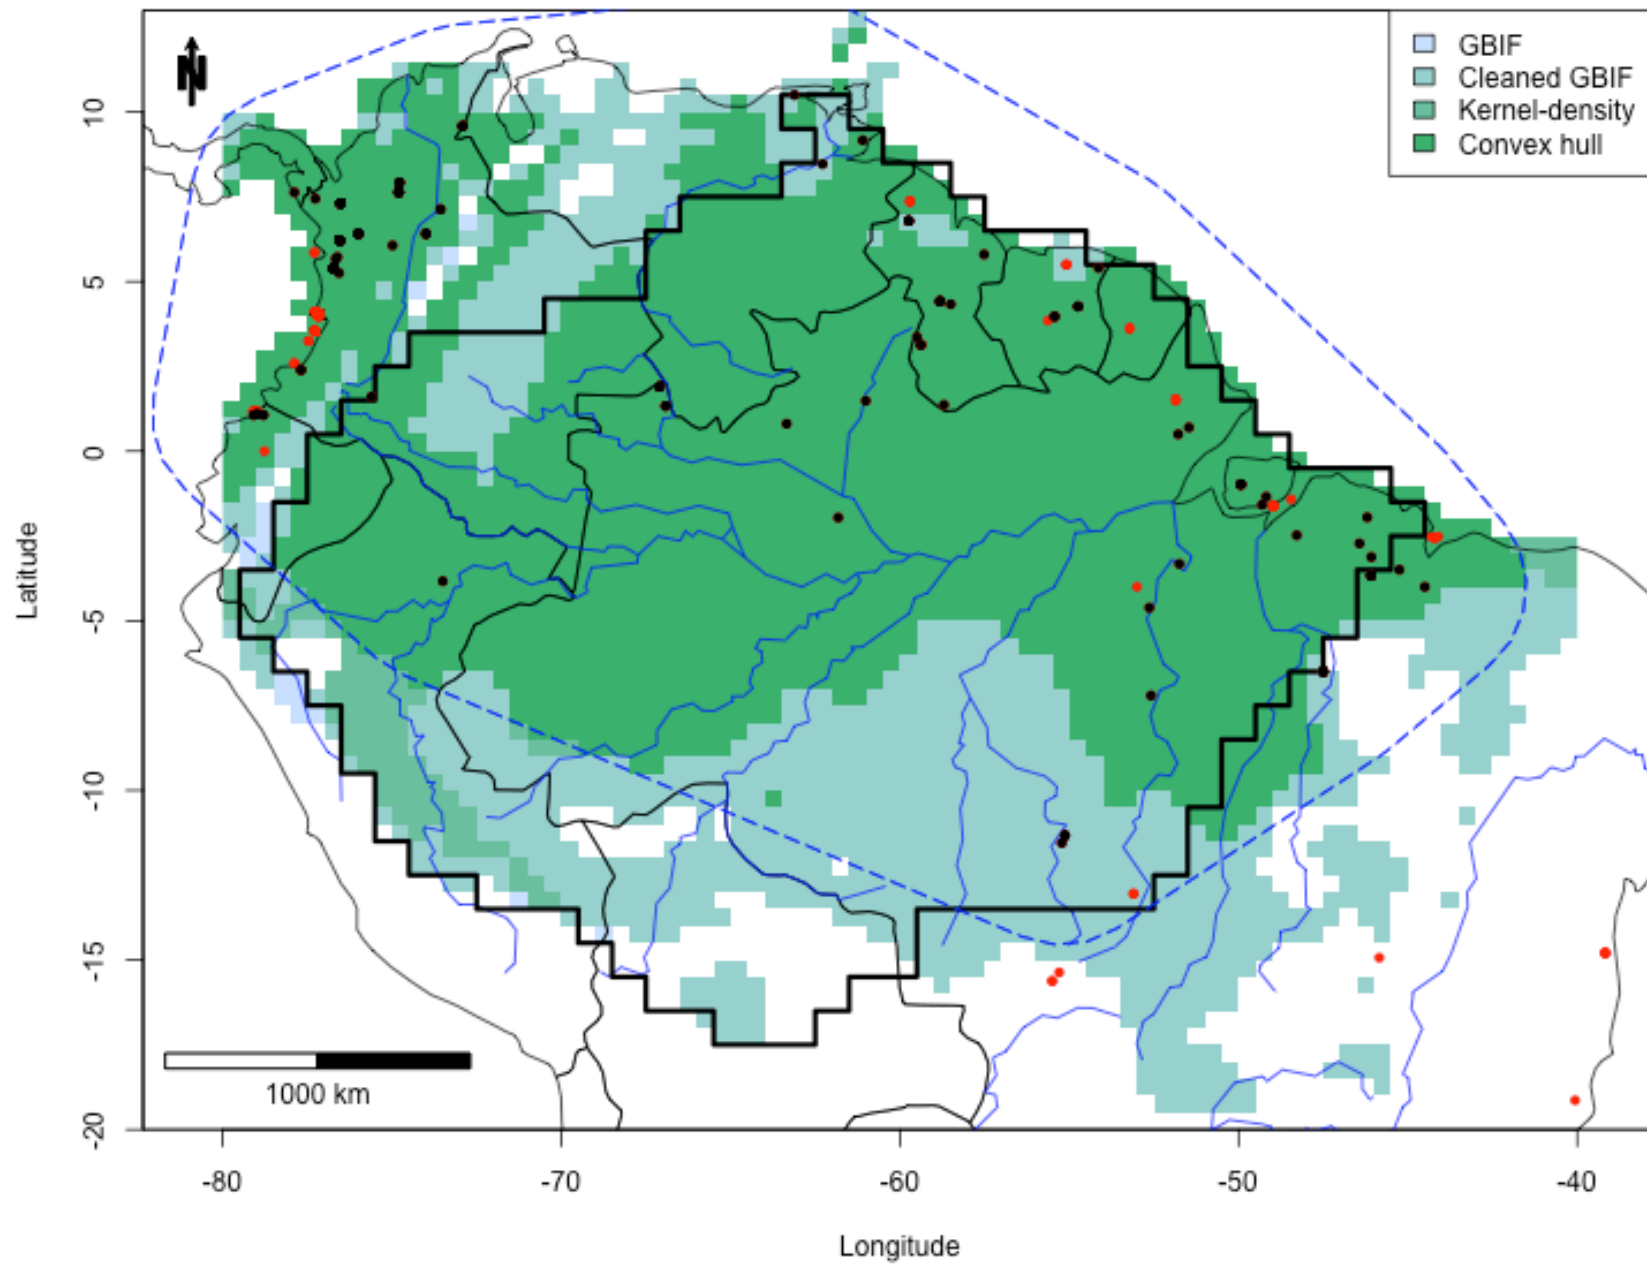

# Euterpe precatoria

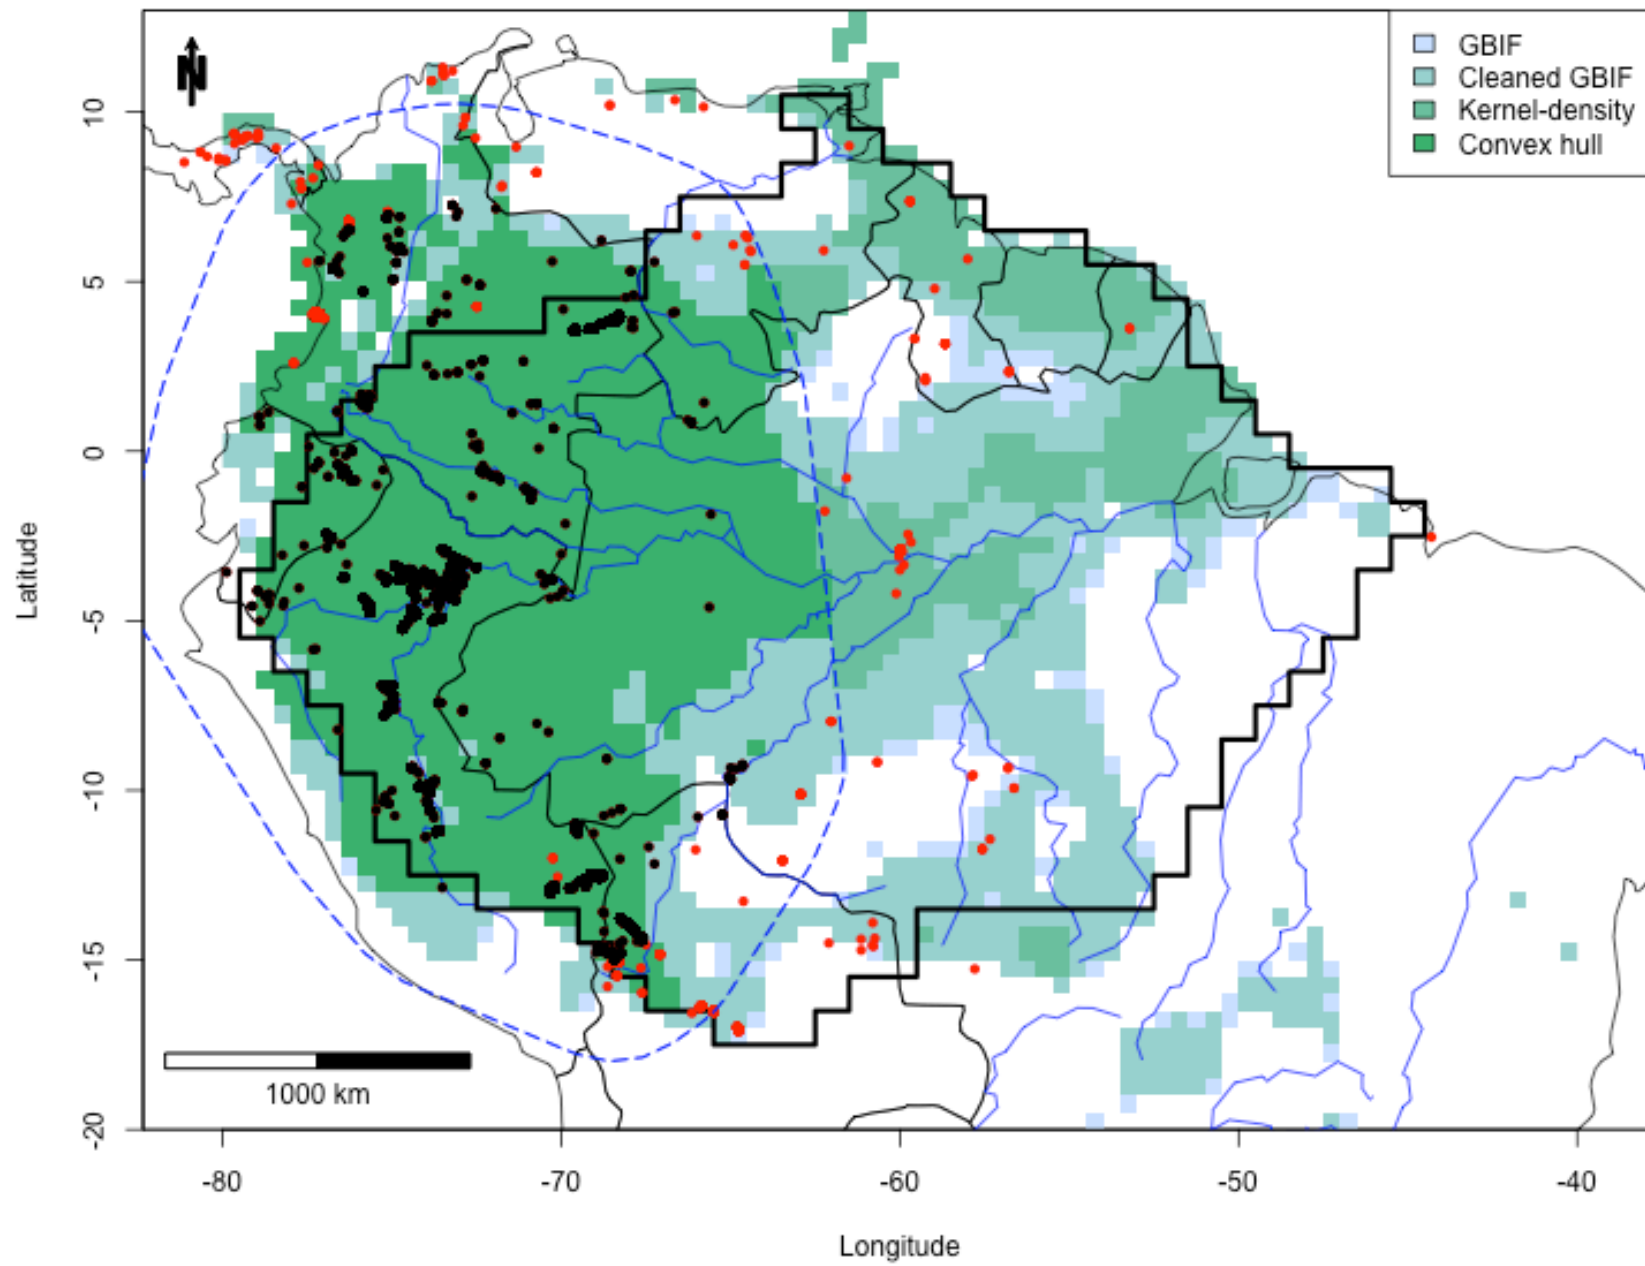



# Garcinia macrophylla

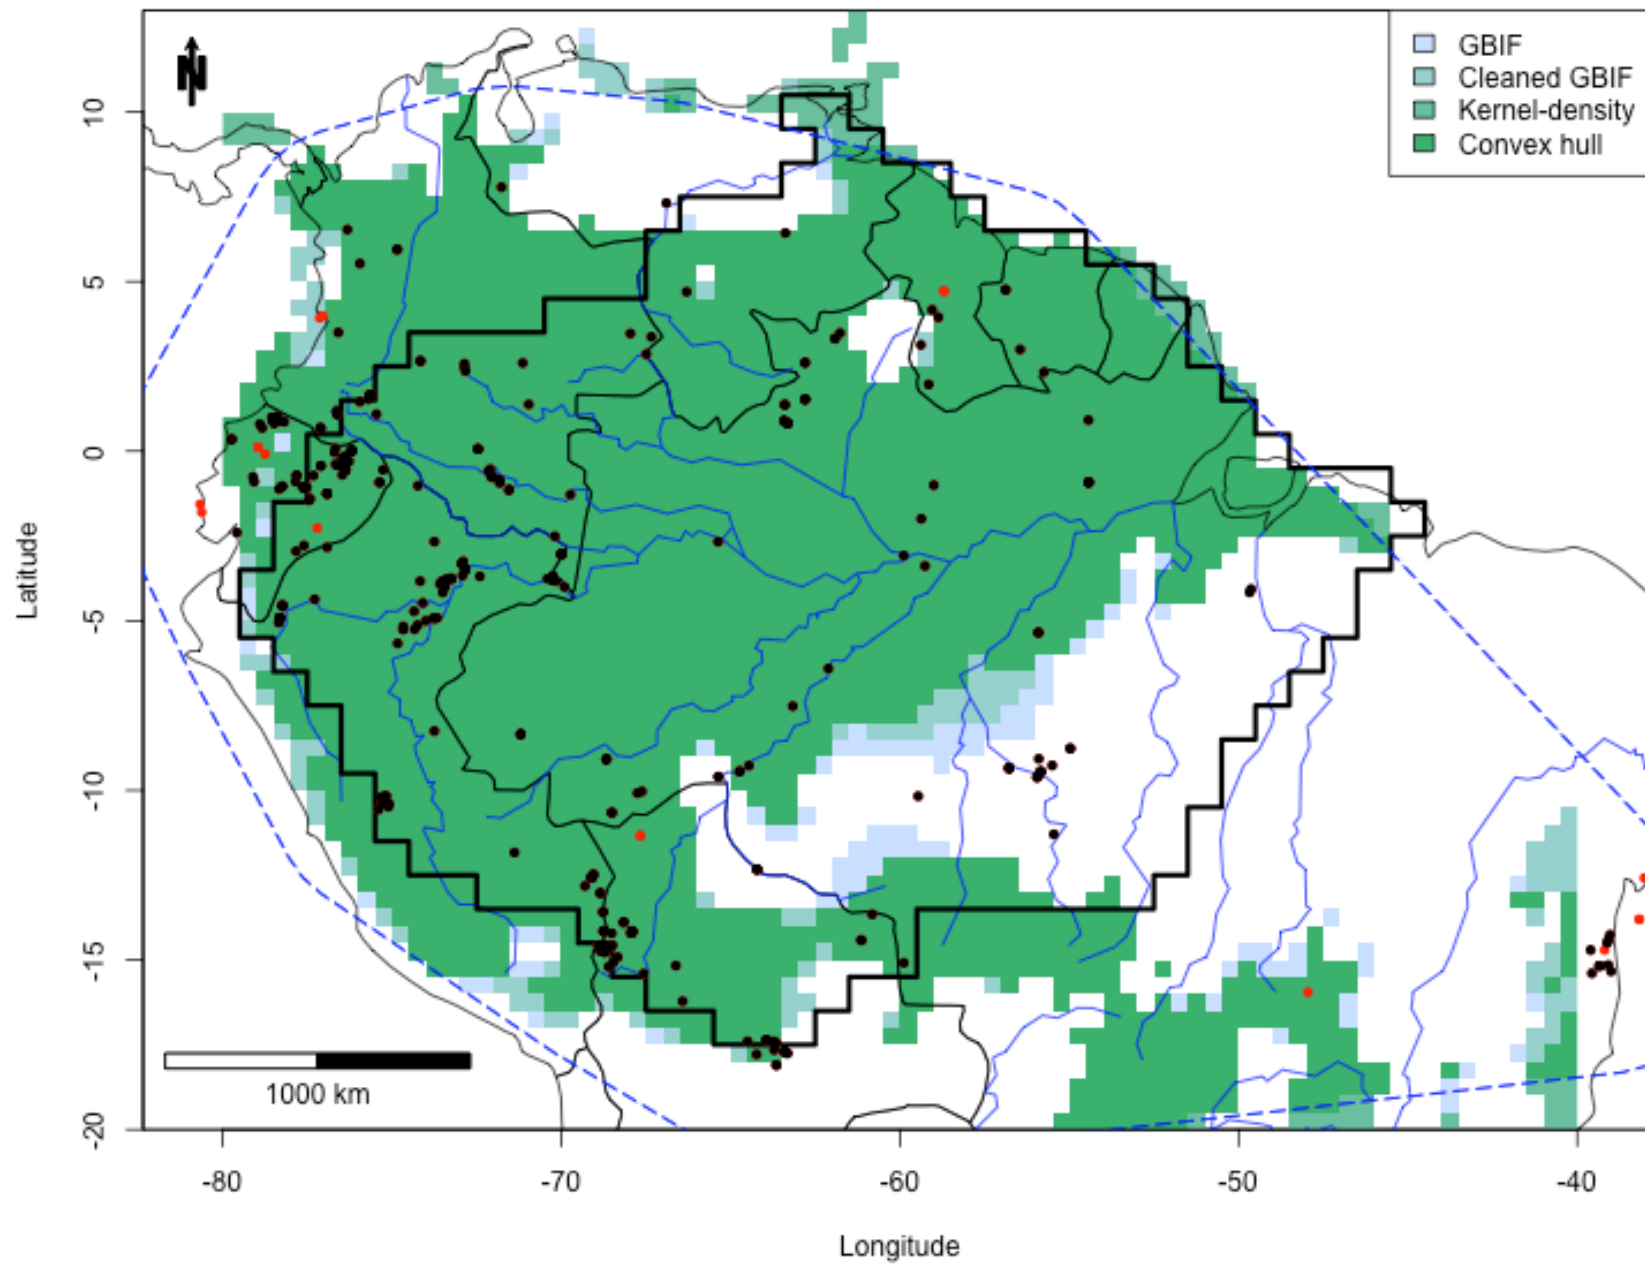

# Geissospermum sericeum

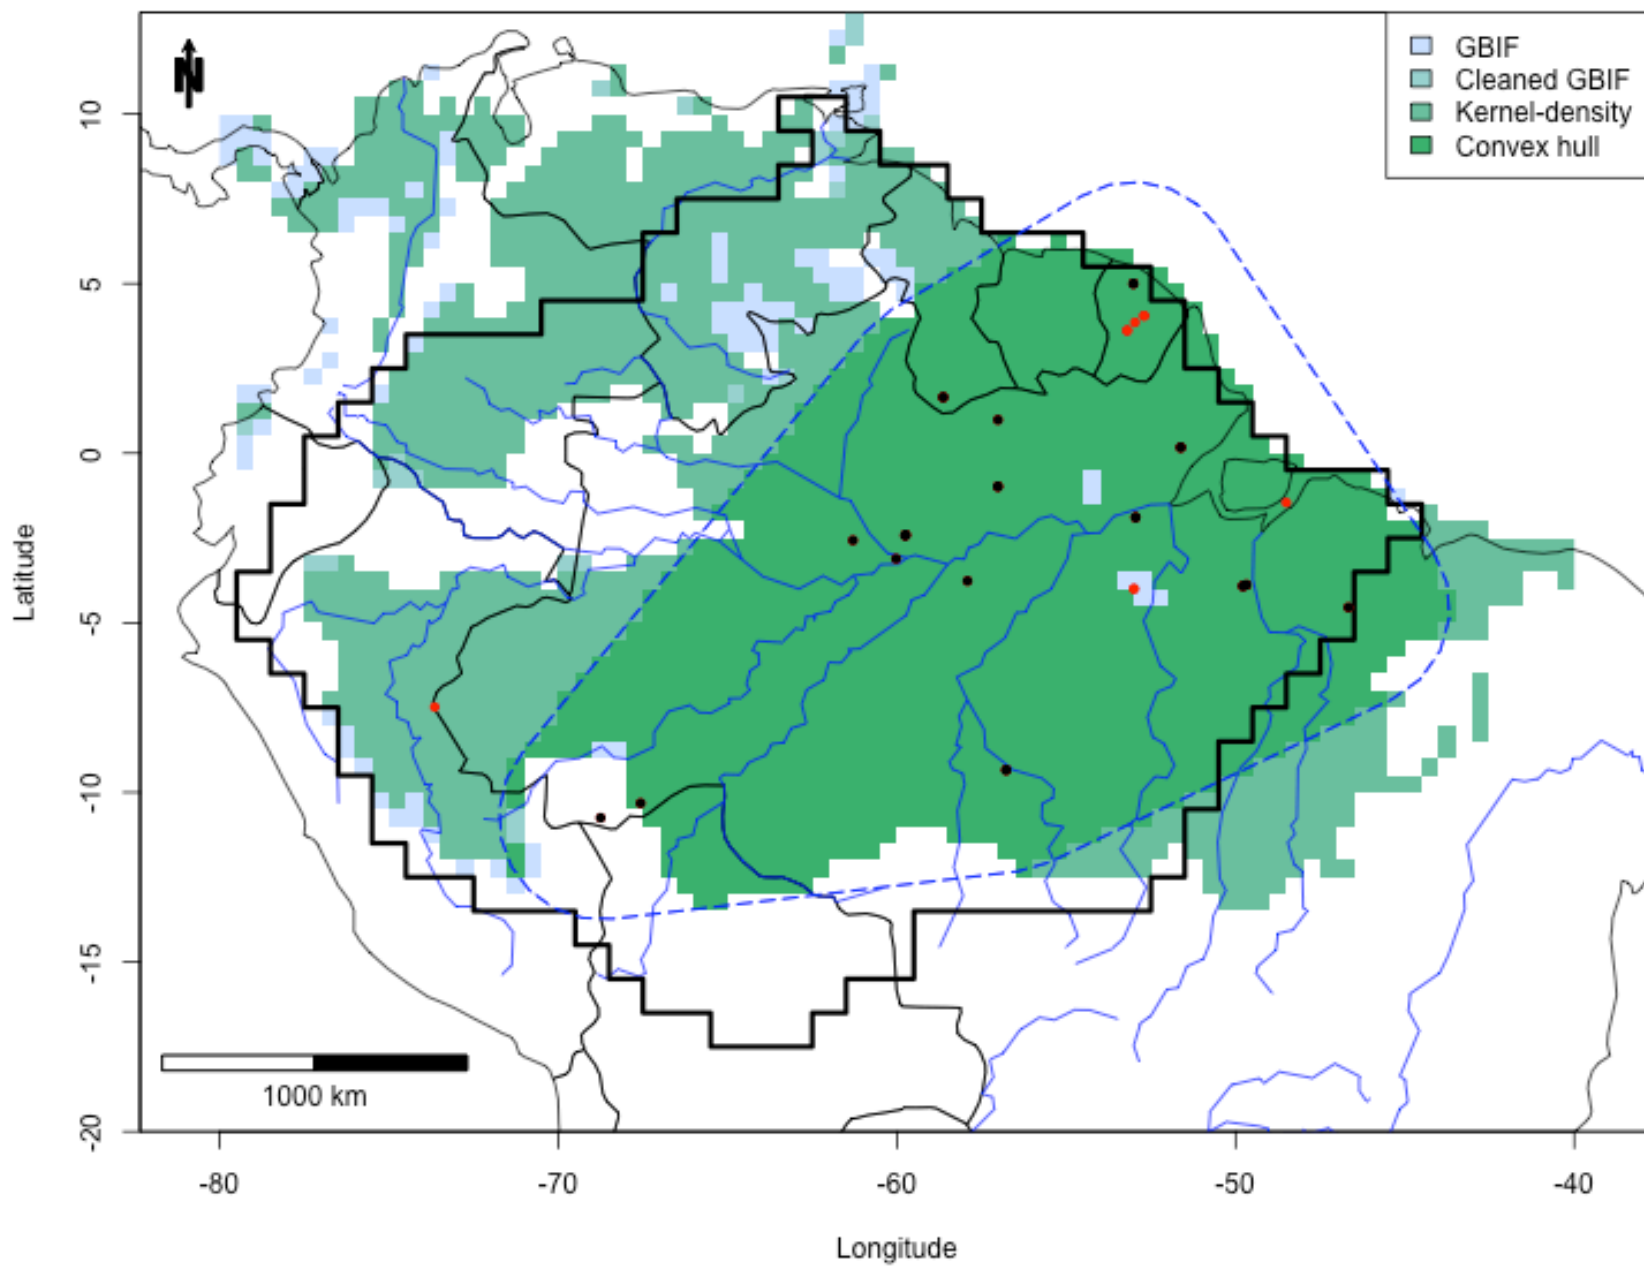

# Goupia glabra

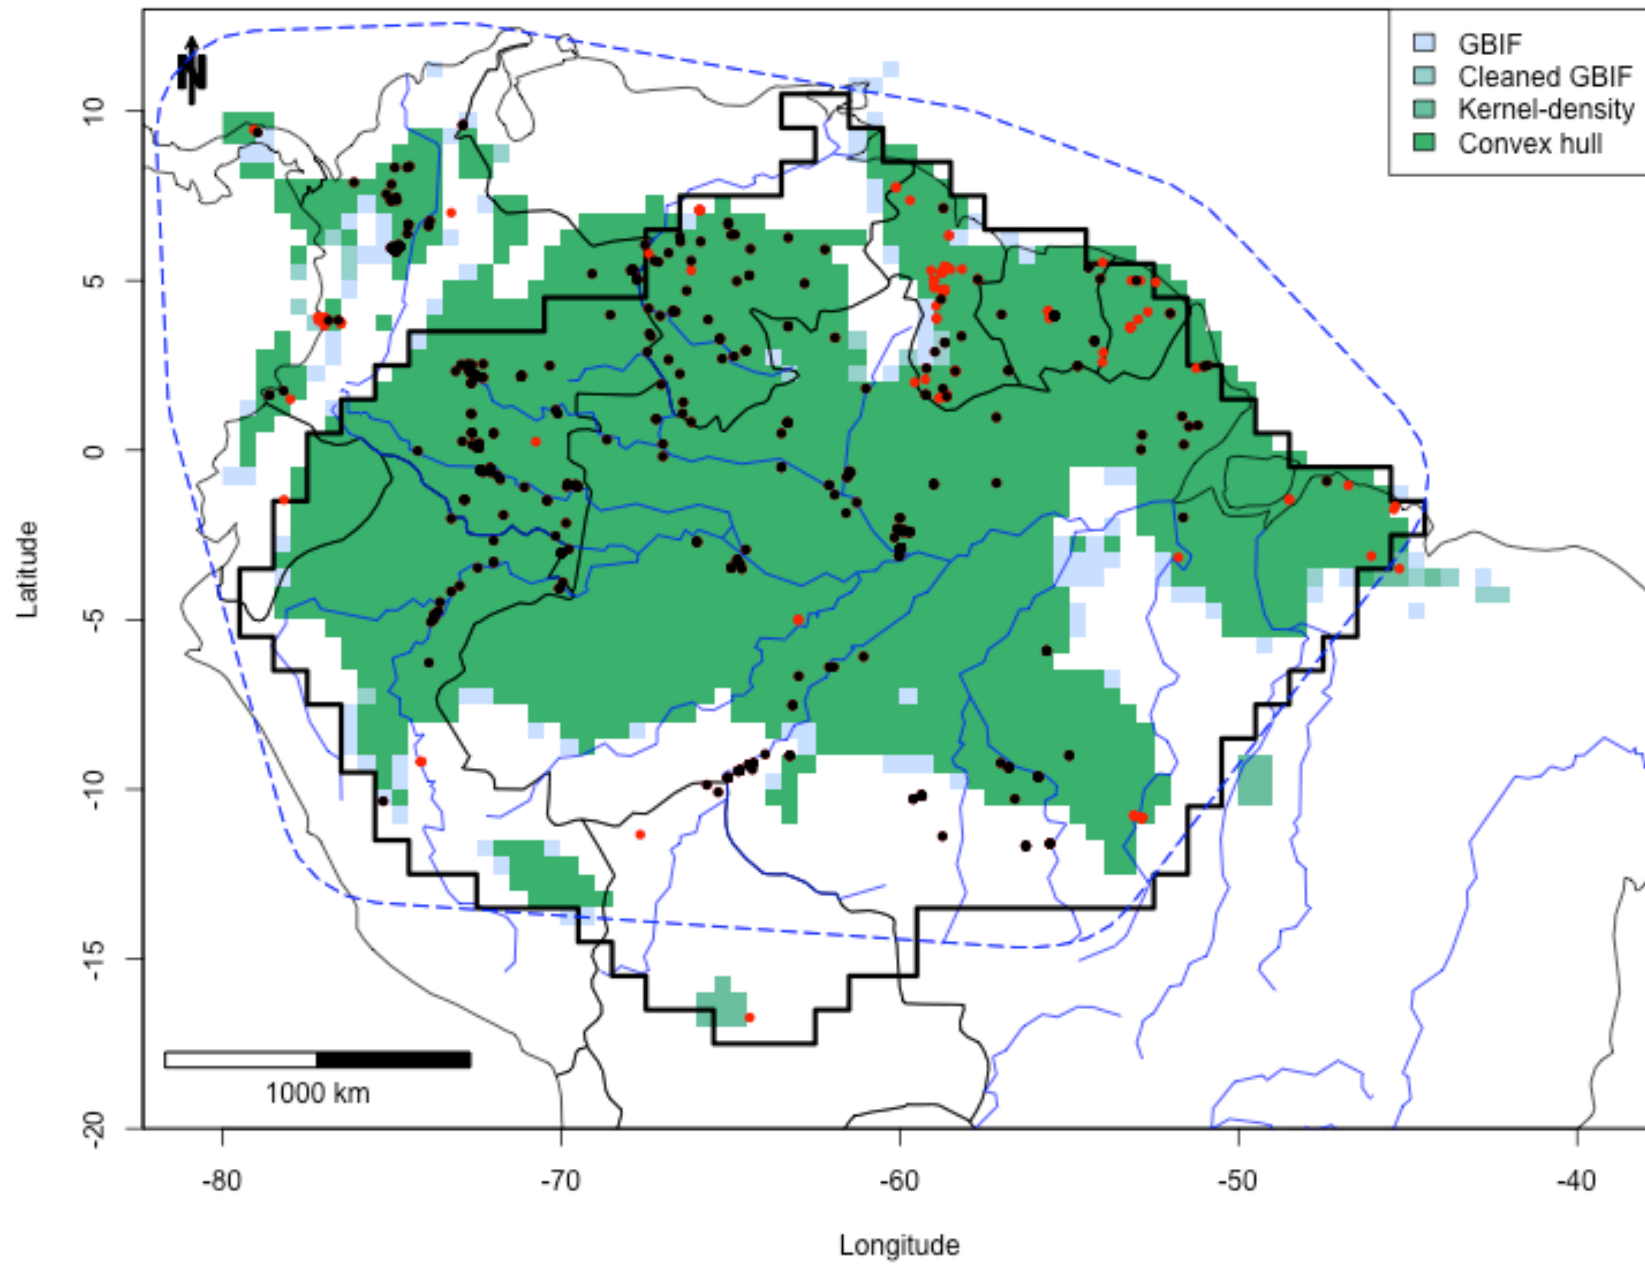

# Guapira venosa

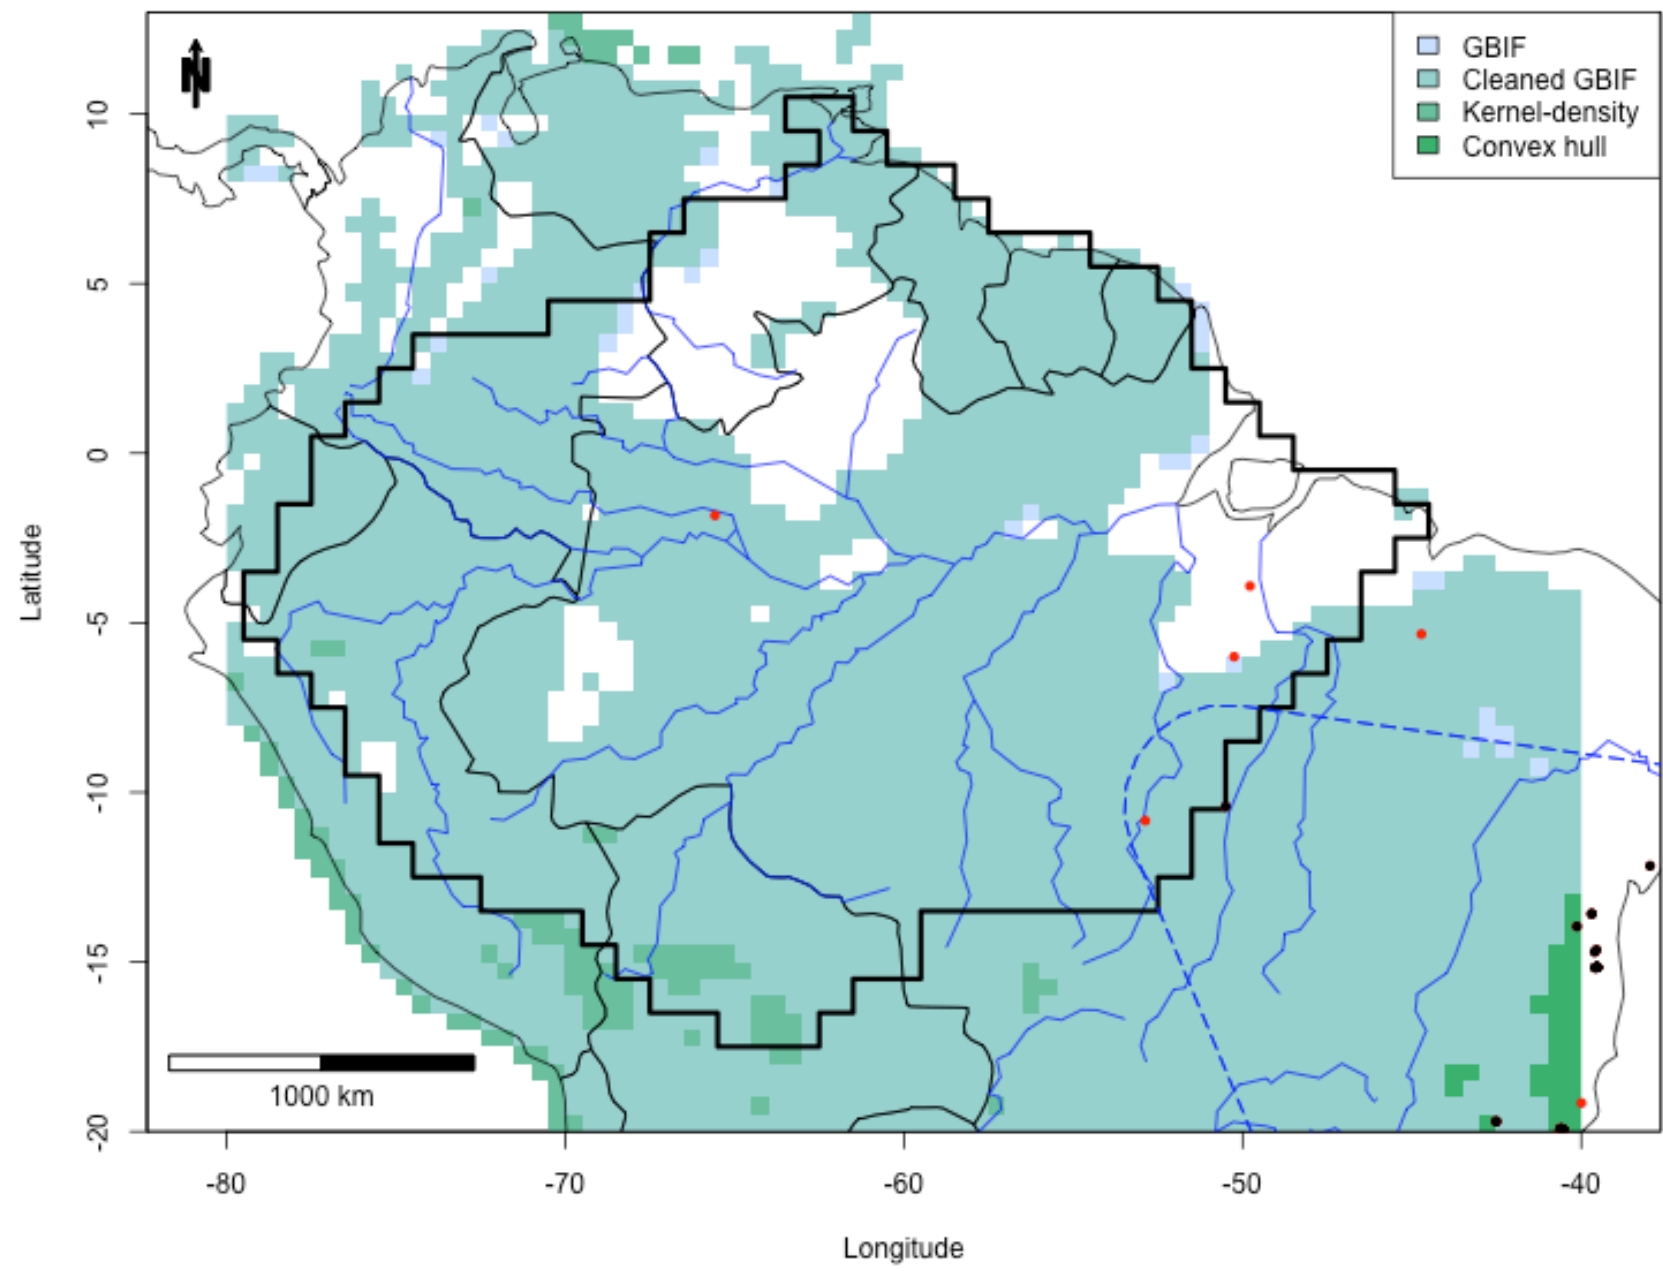

# Guarea guidonia

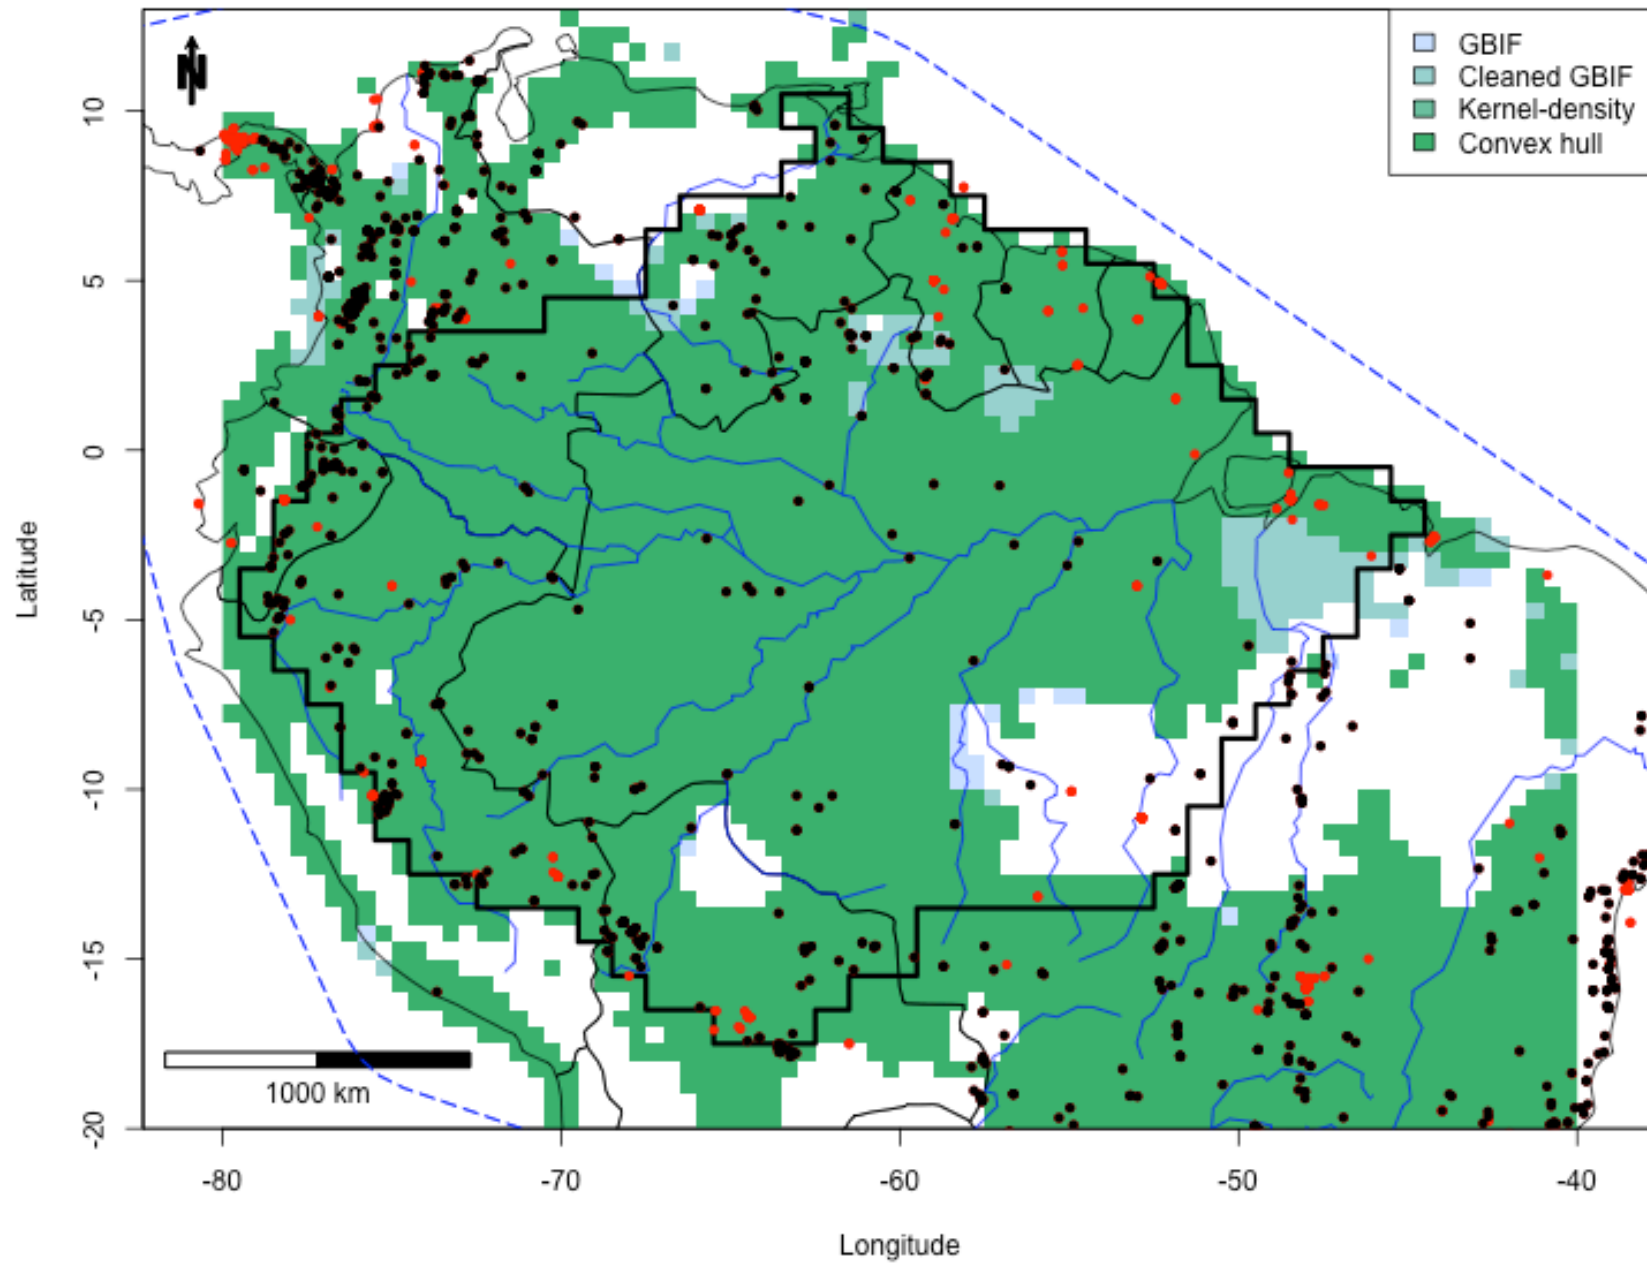

# Guarea kunthiana

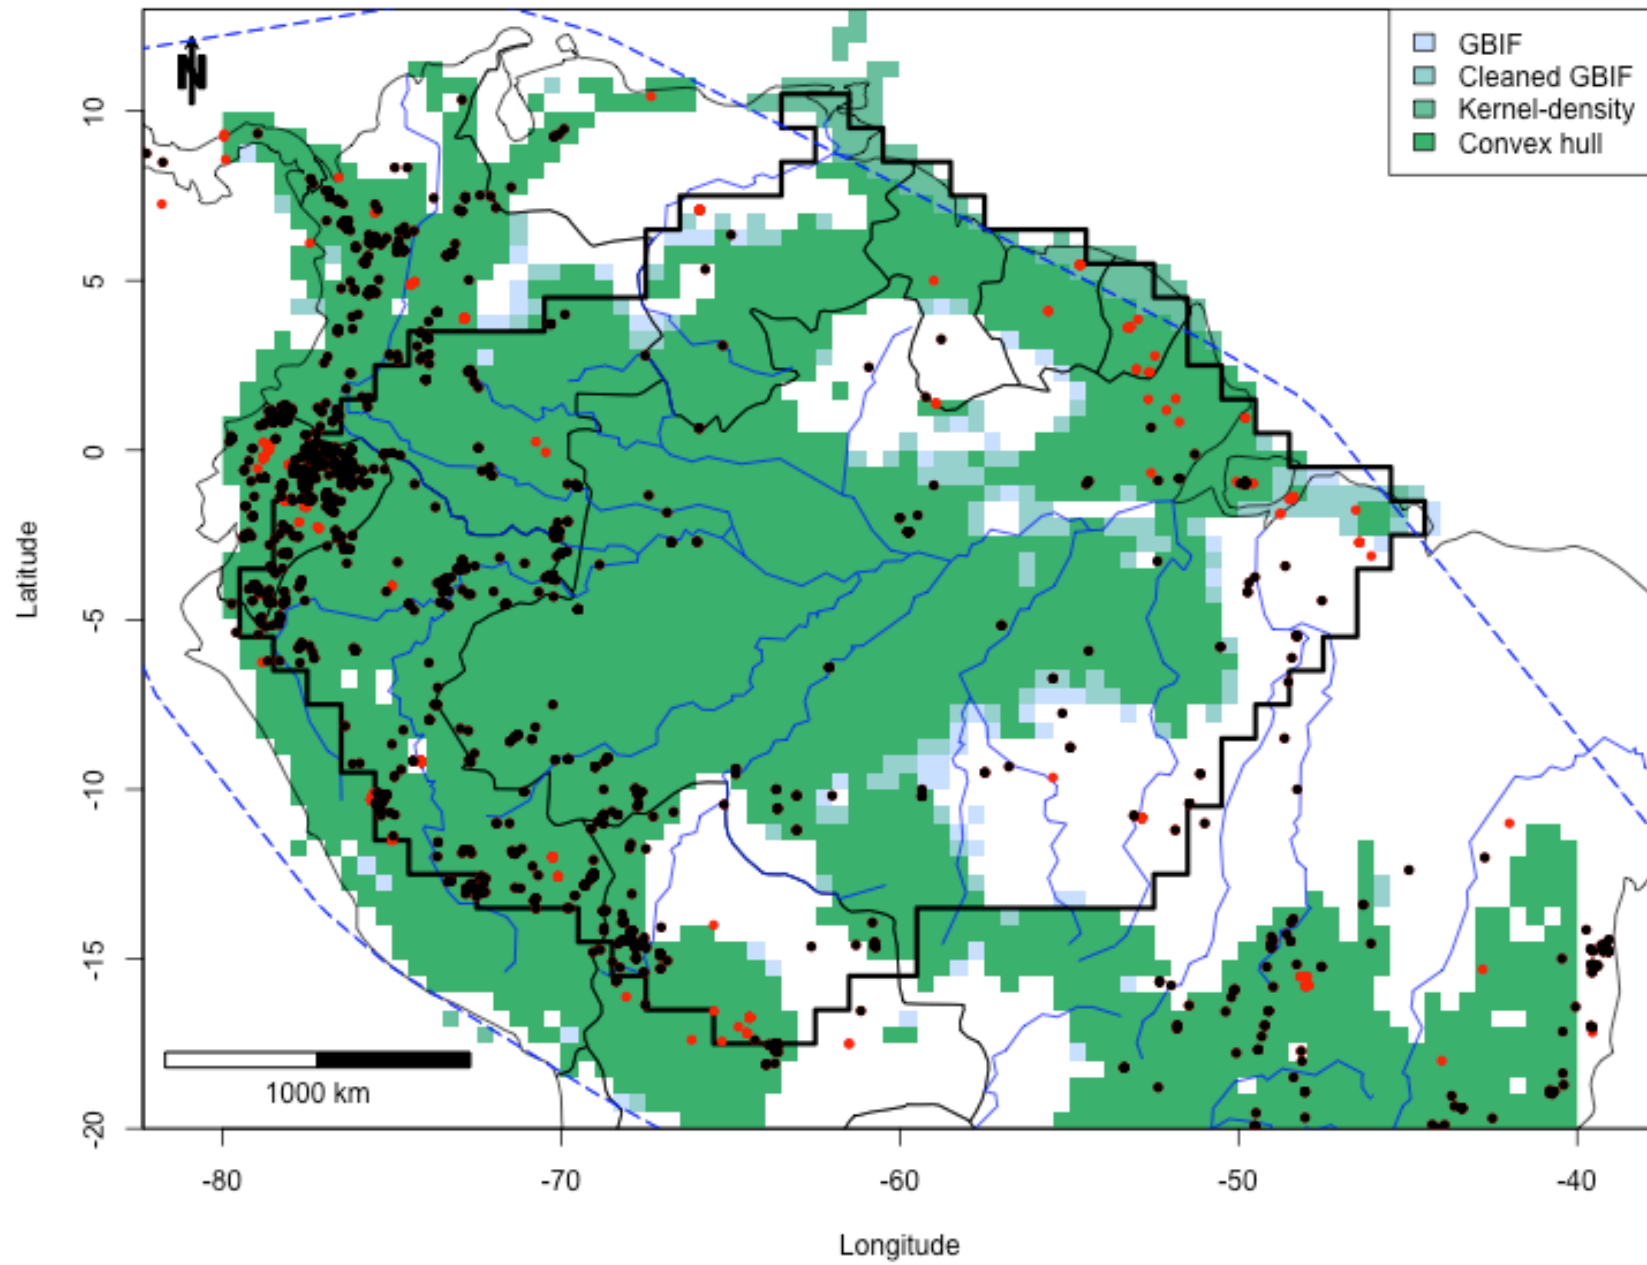

# Guarea macrophylla

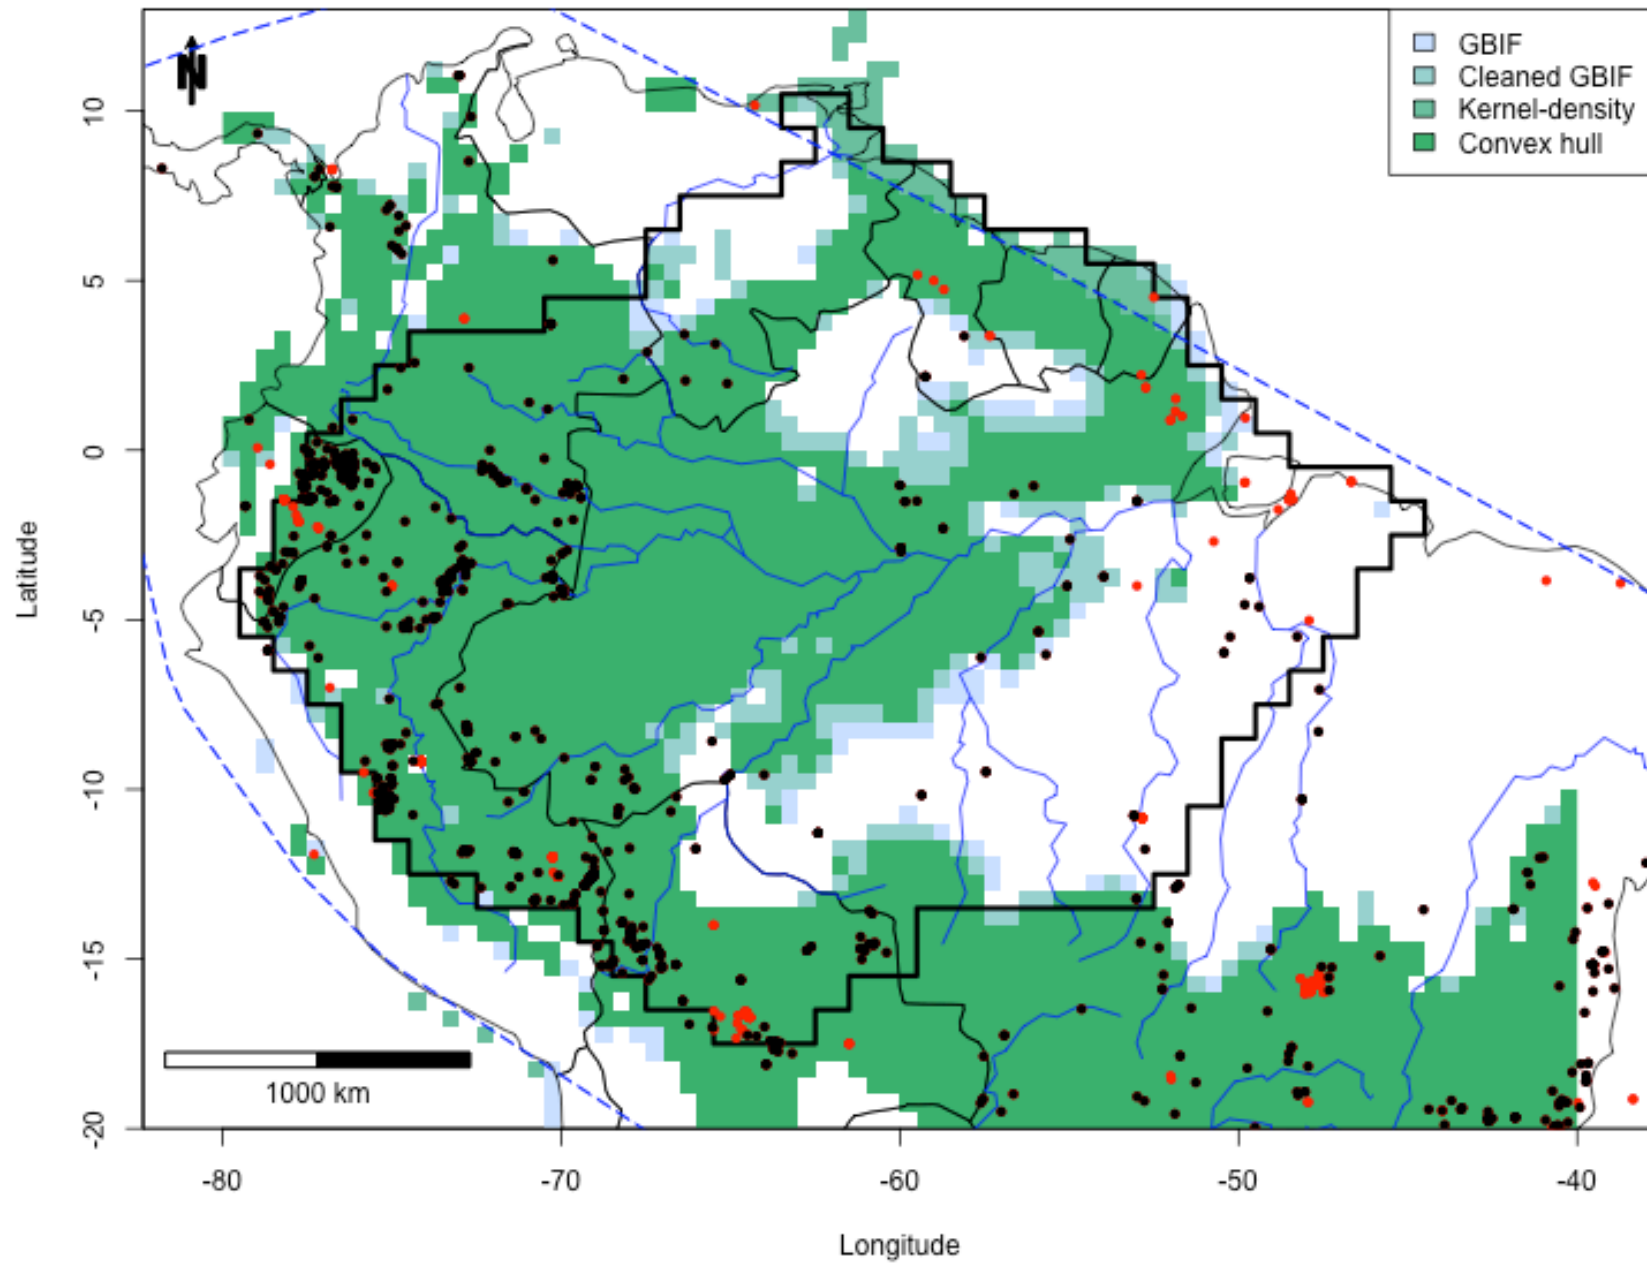



# Guarea silvatica

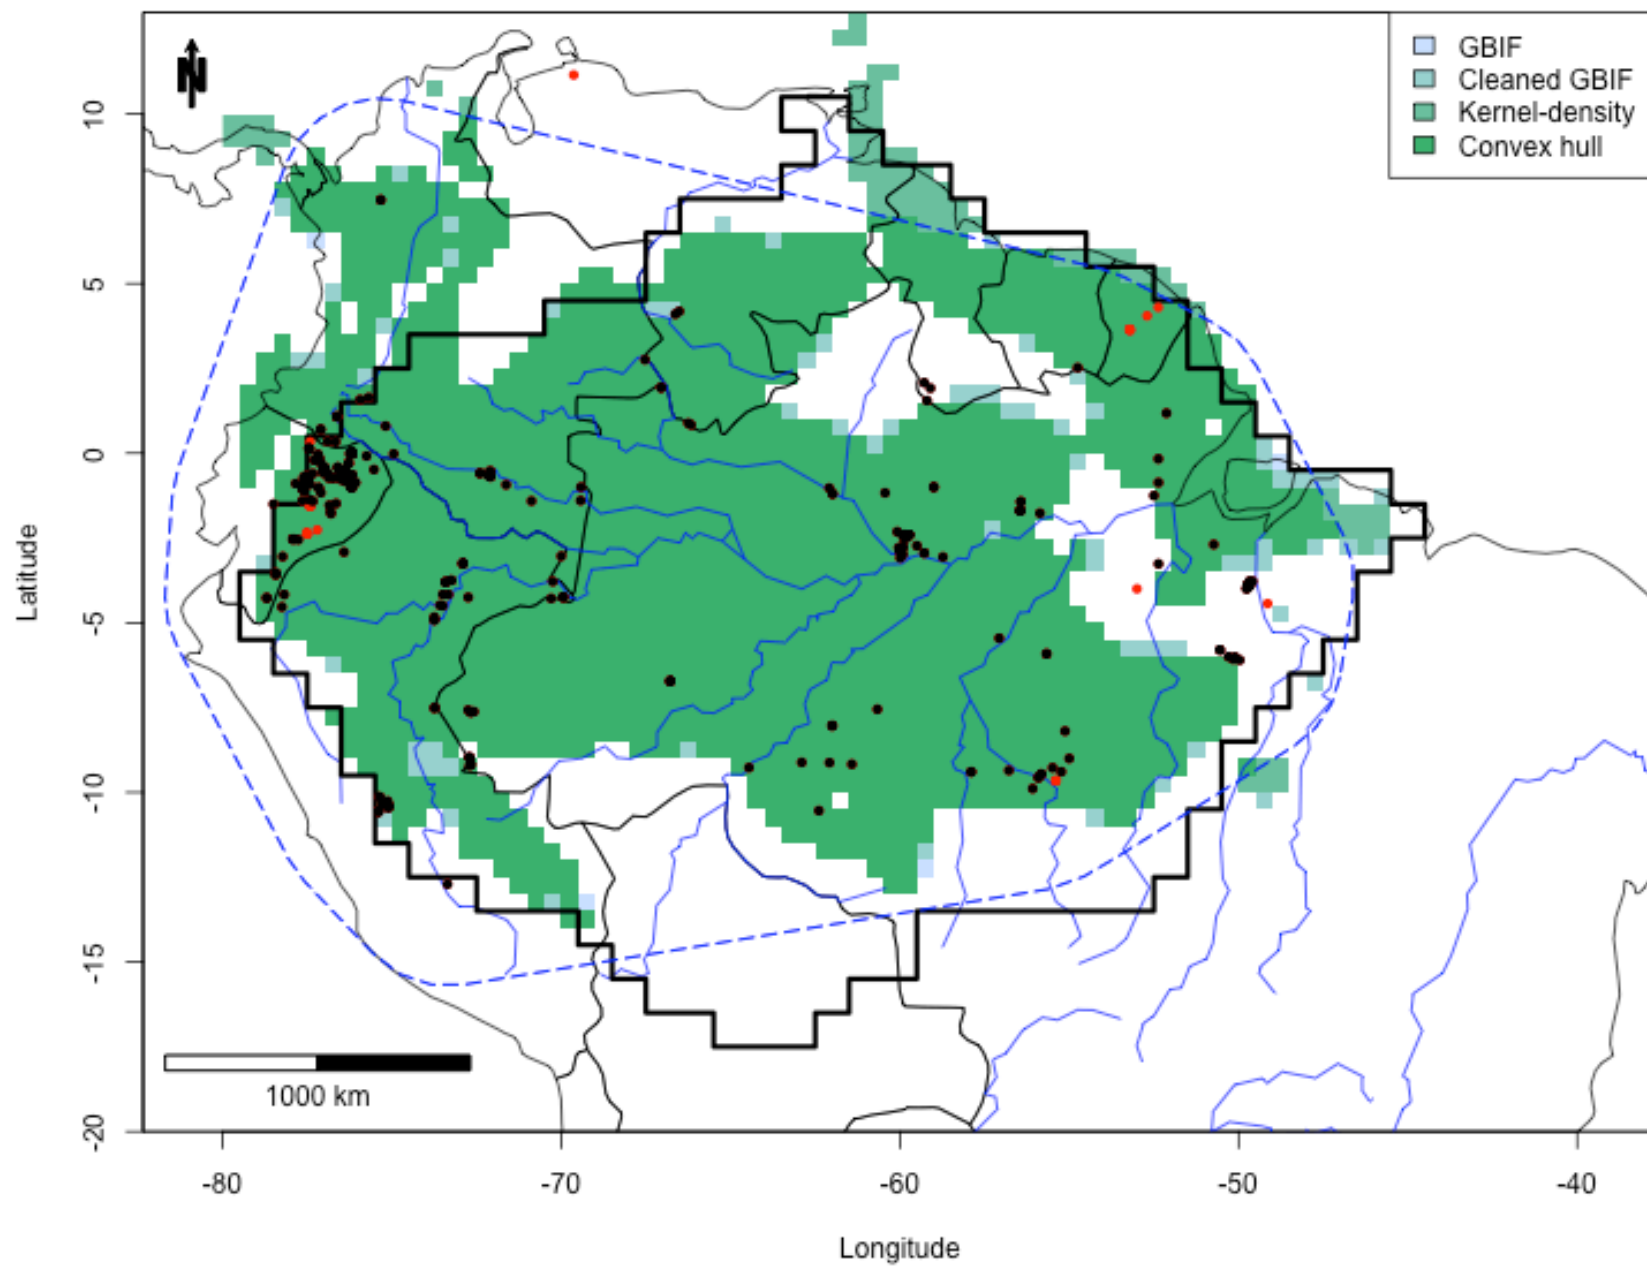



# Gustavia augusta

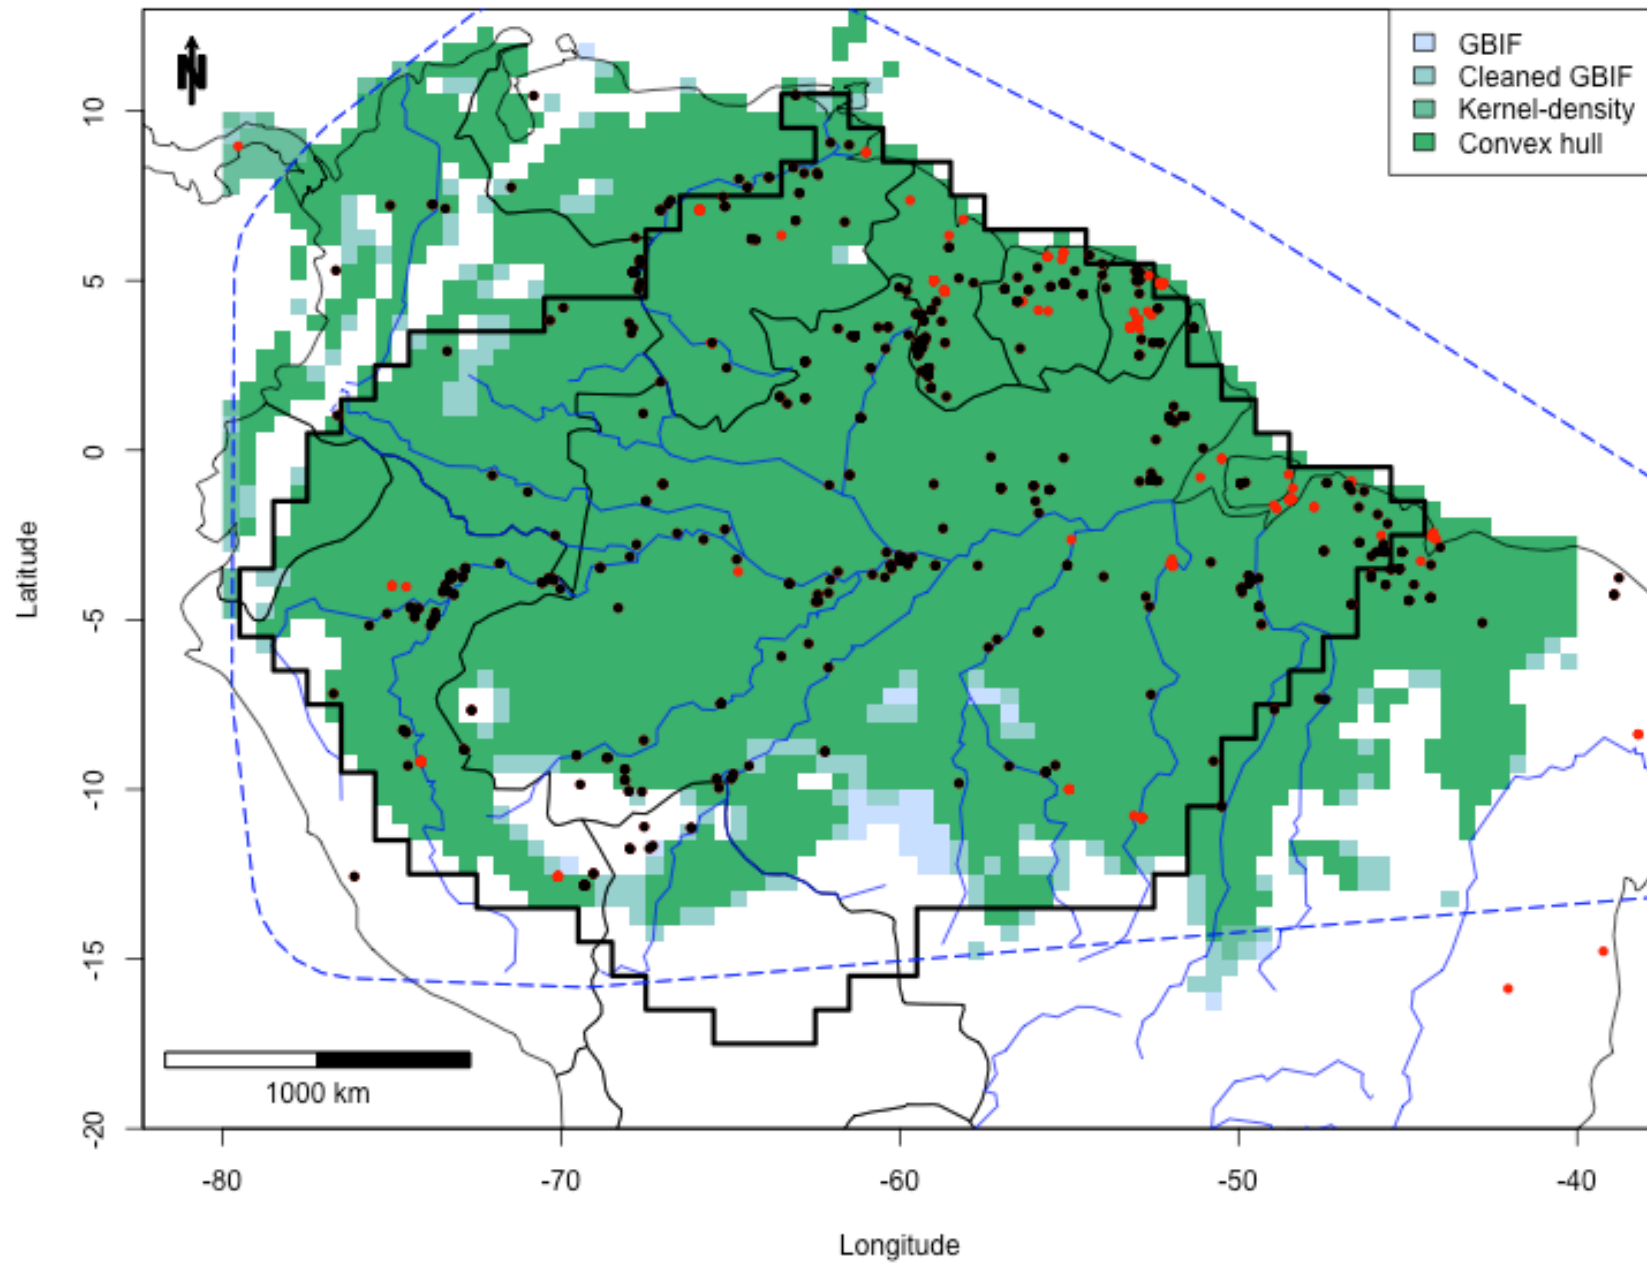

# *Gustavia hexapetala*

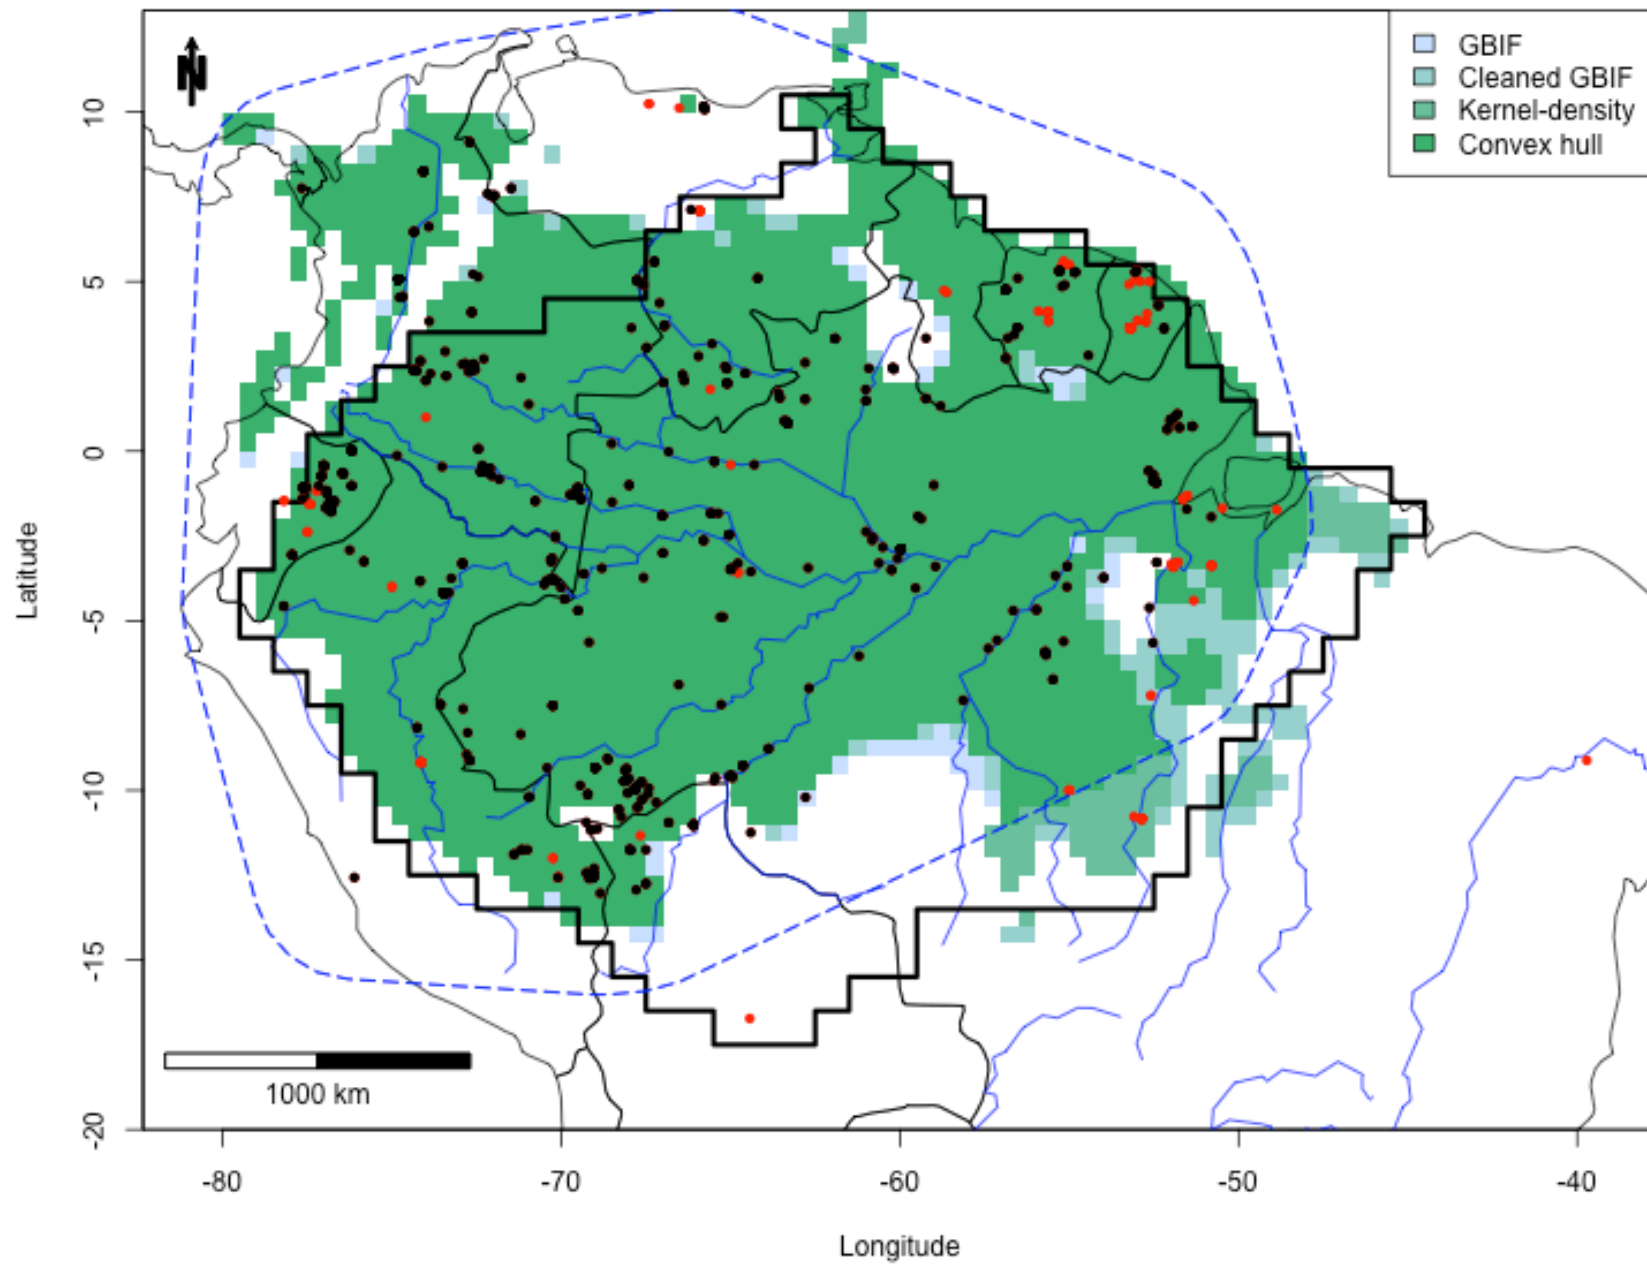

# Handroanthus barbatus

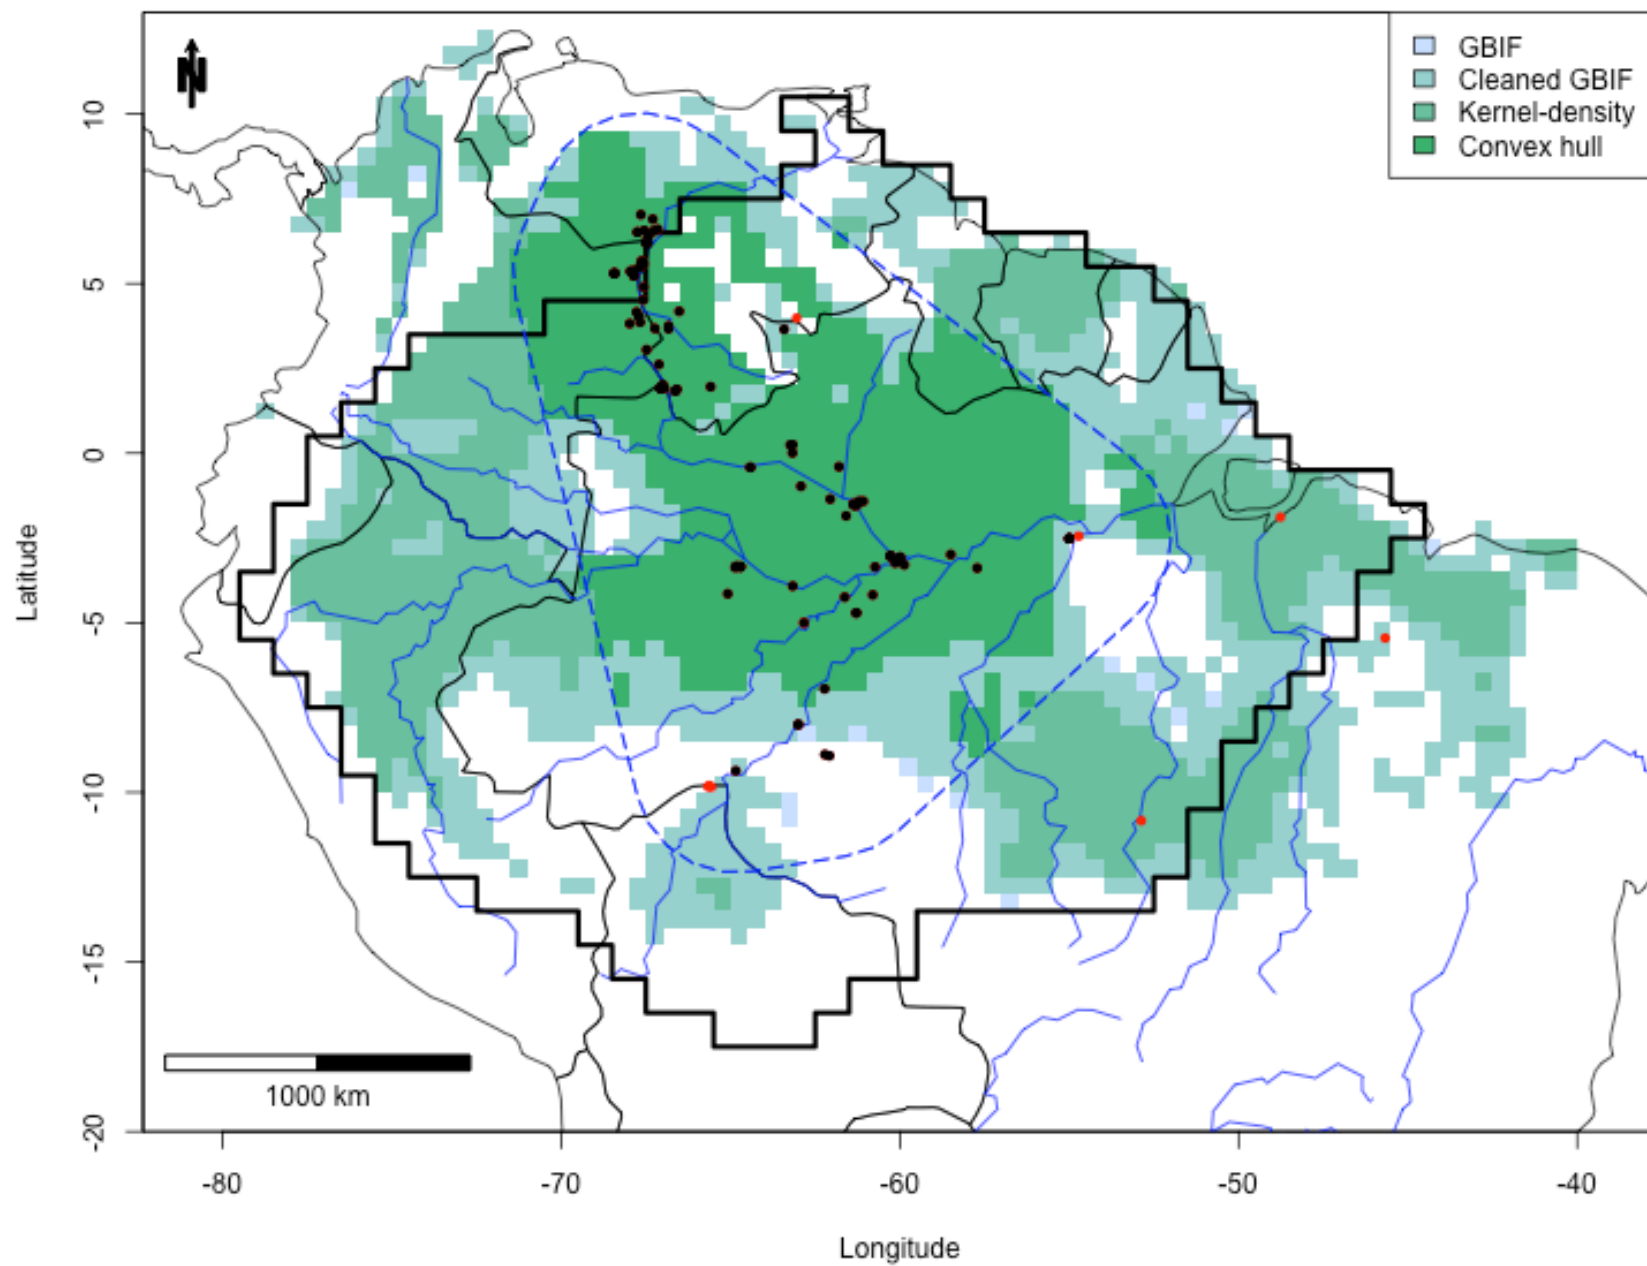

# Haploclathra cordata

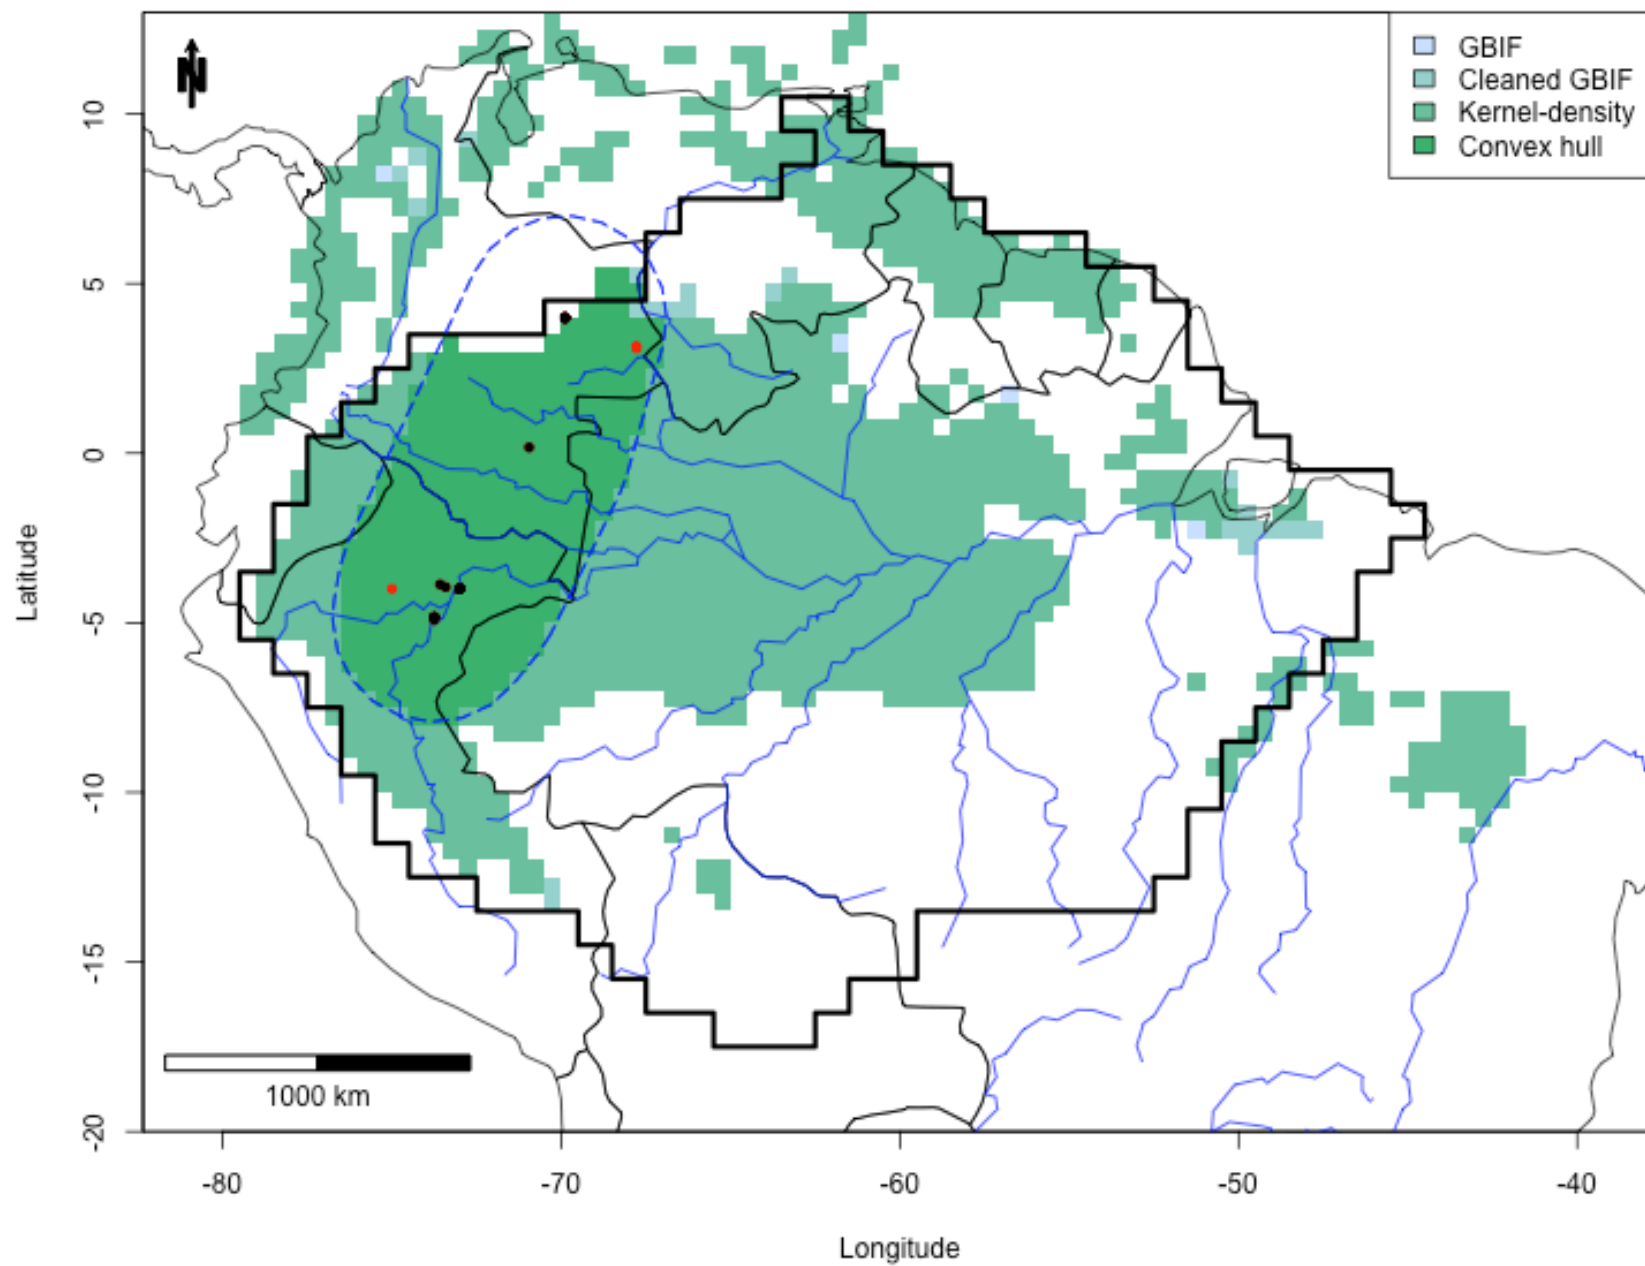

# Helicostylis tomentosa

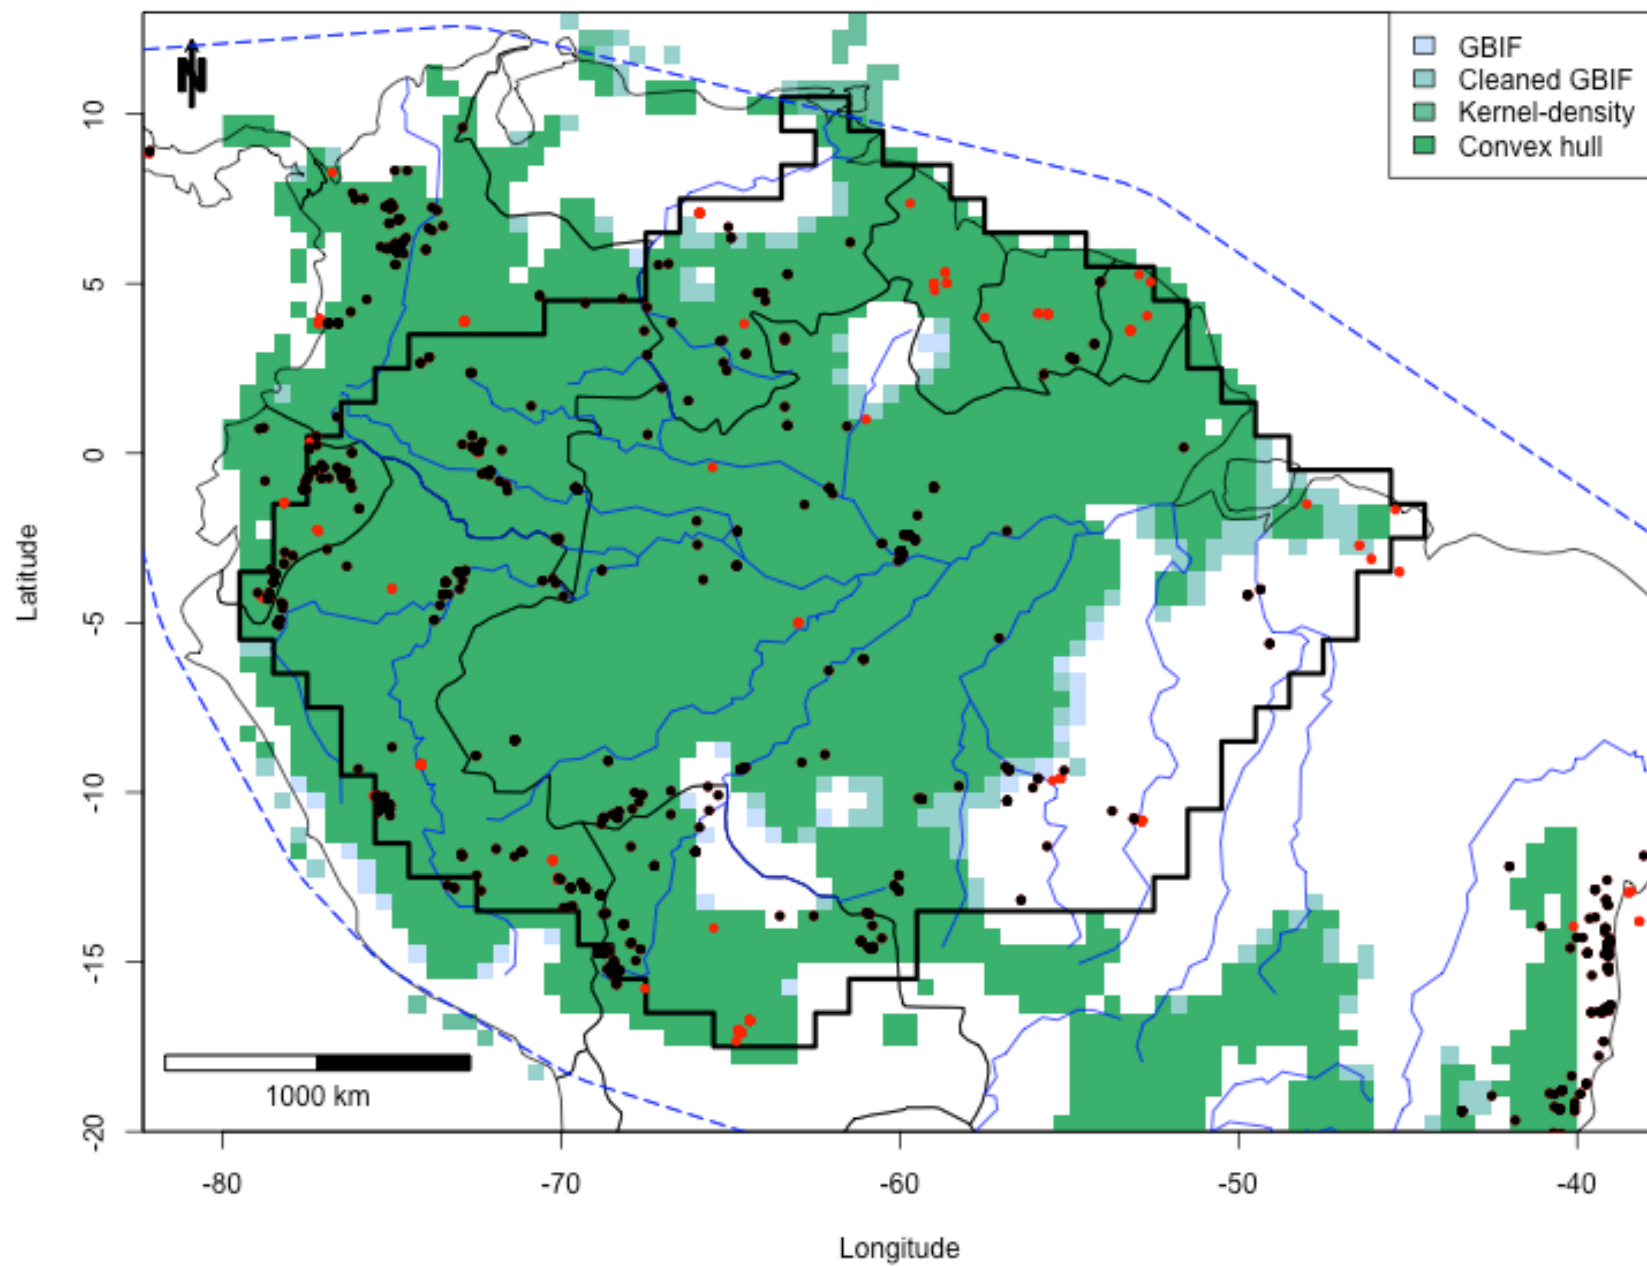

# Hevea brasiliensis

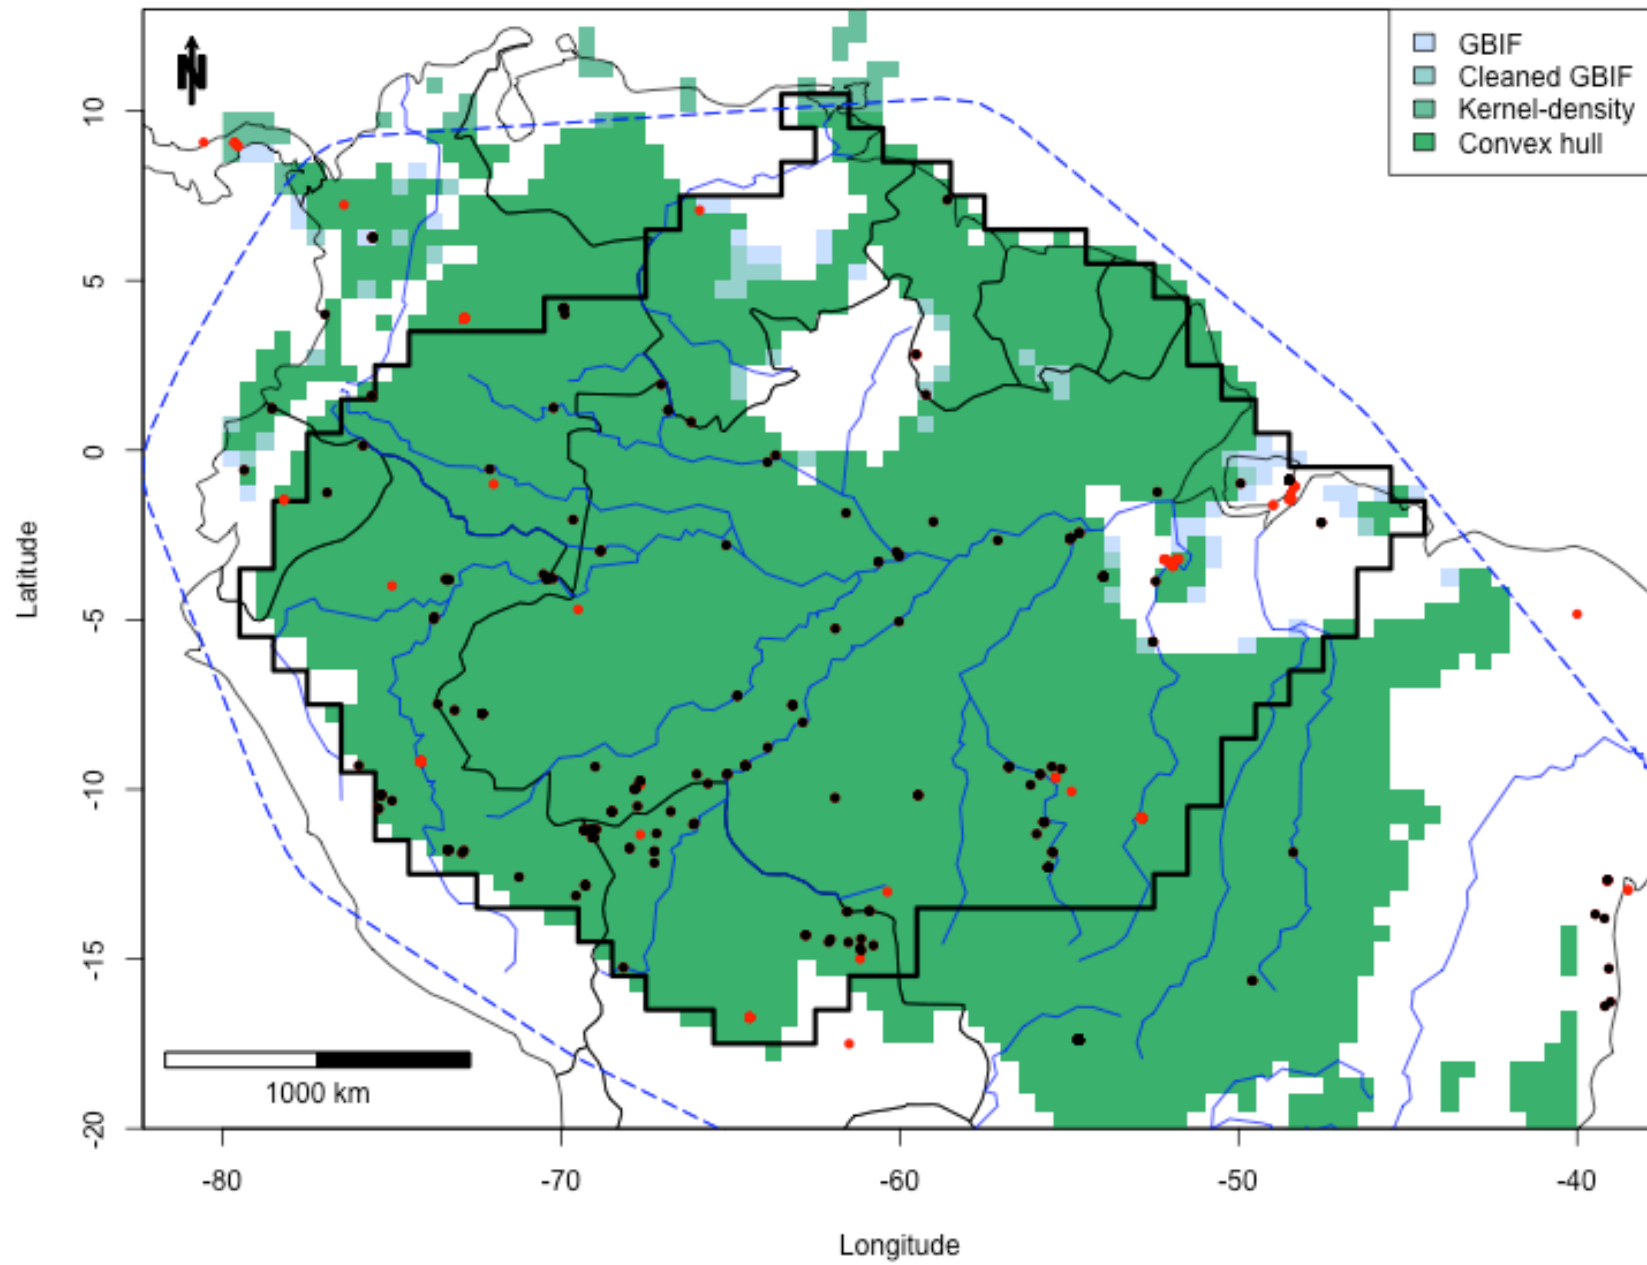

# Hevea guianensis

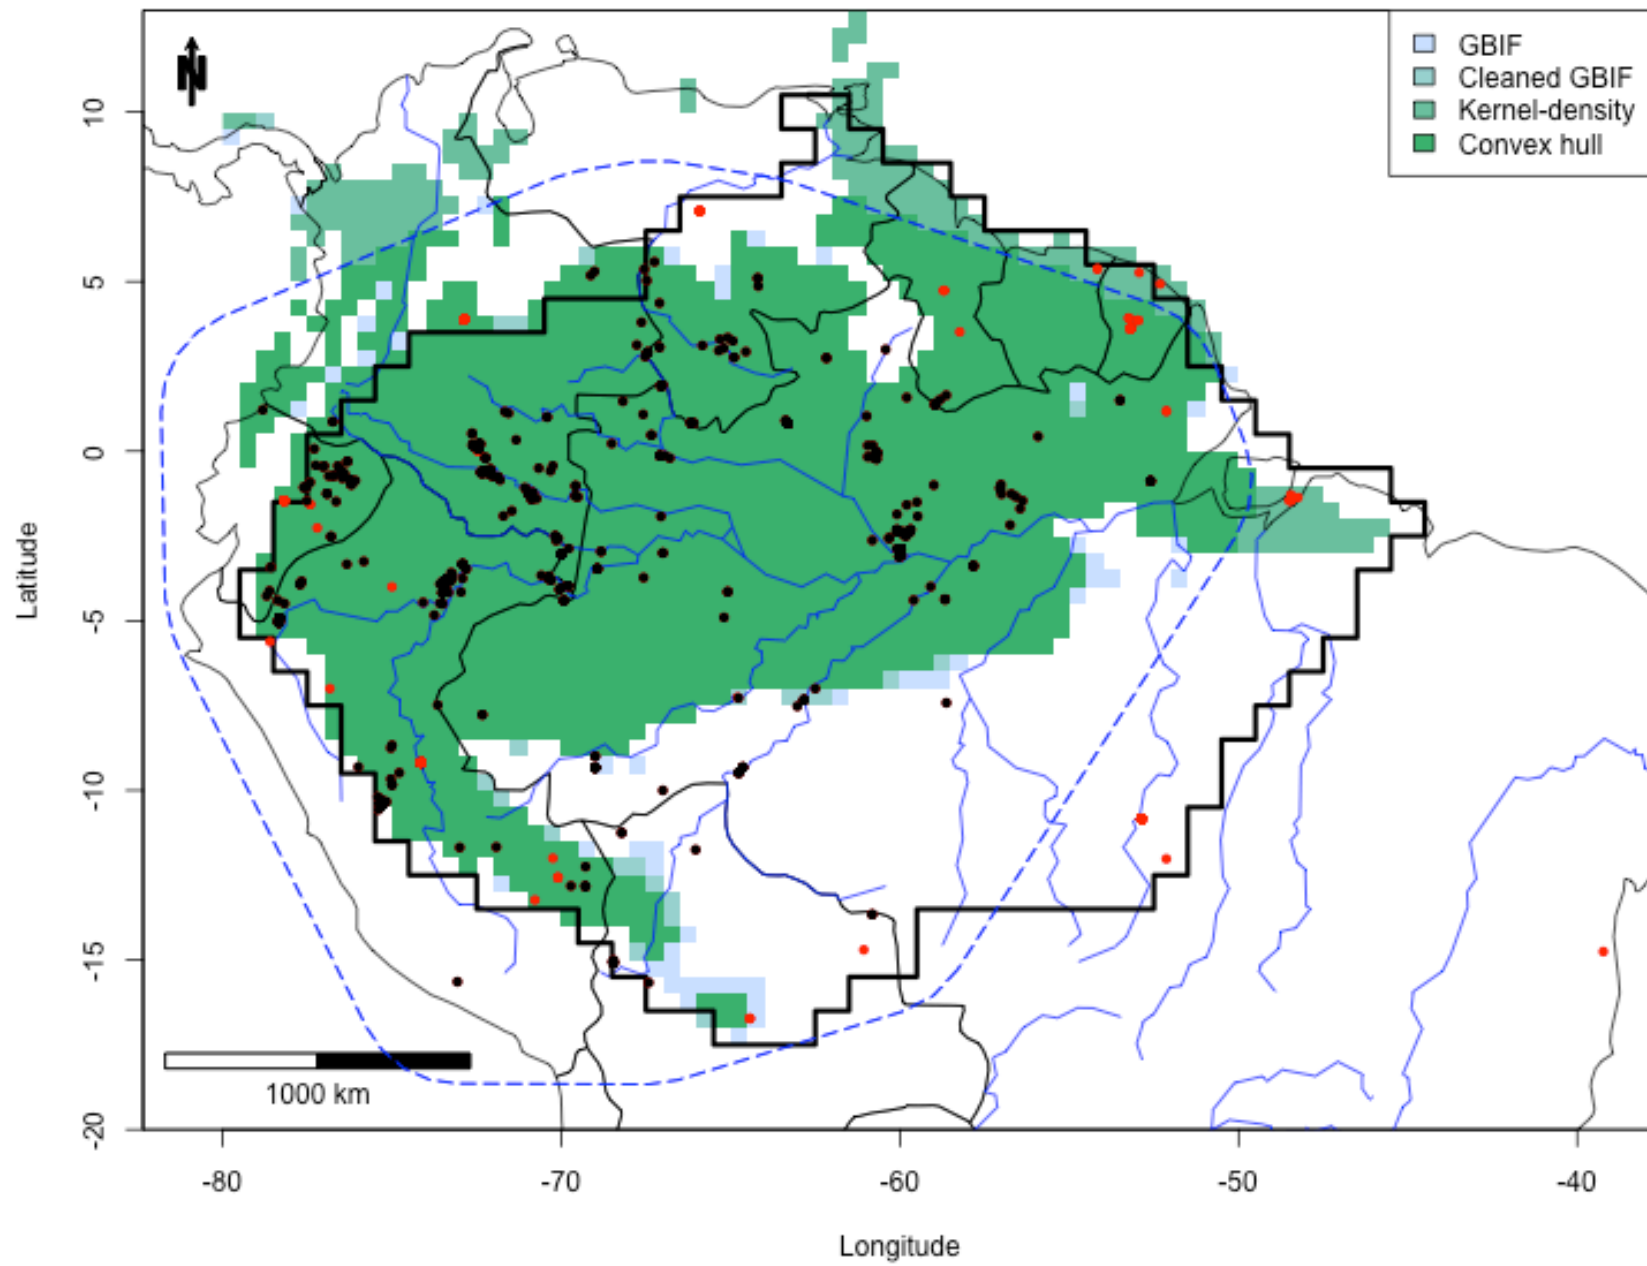



# Himatanthus sucuuba

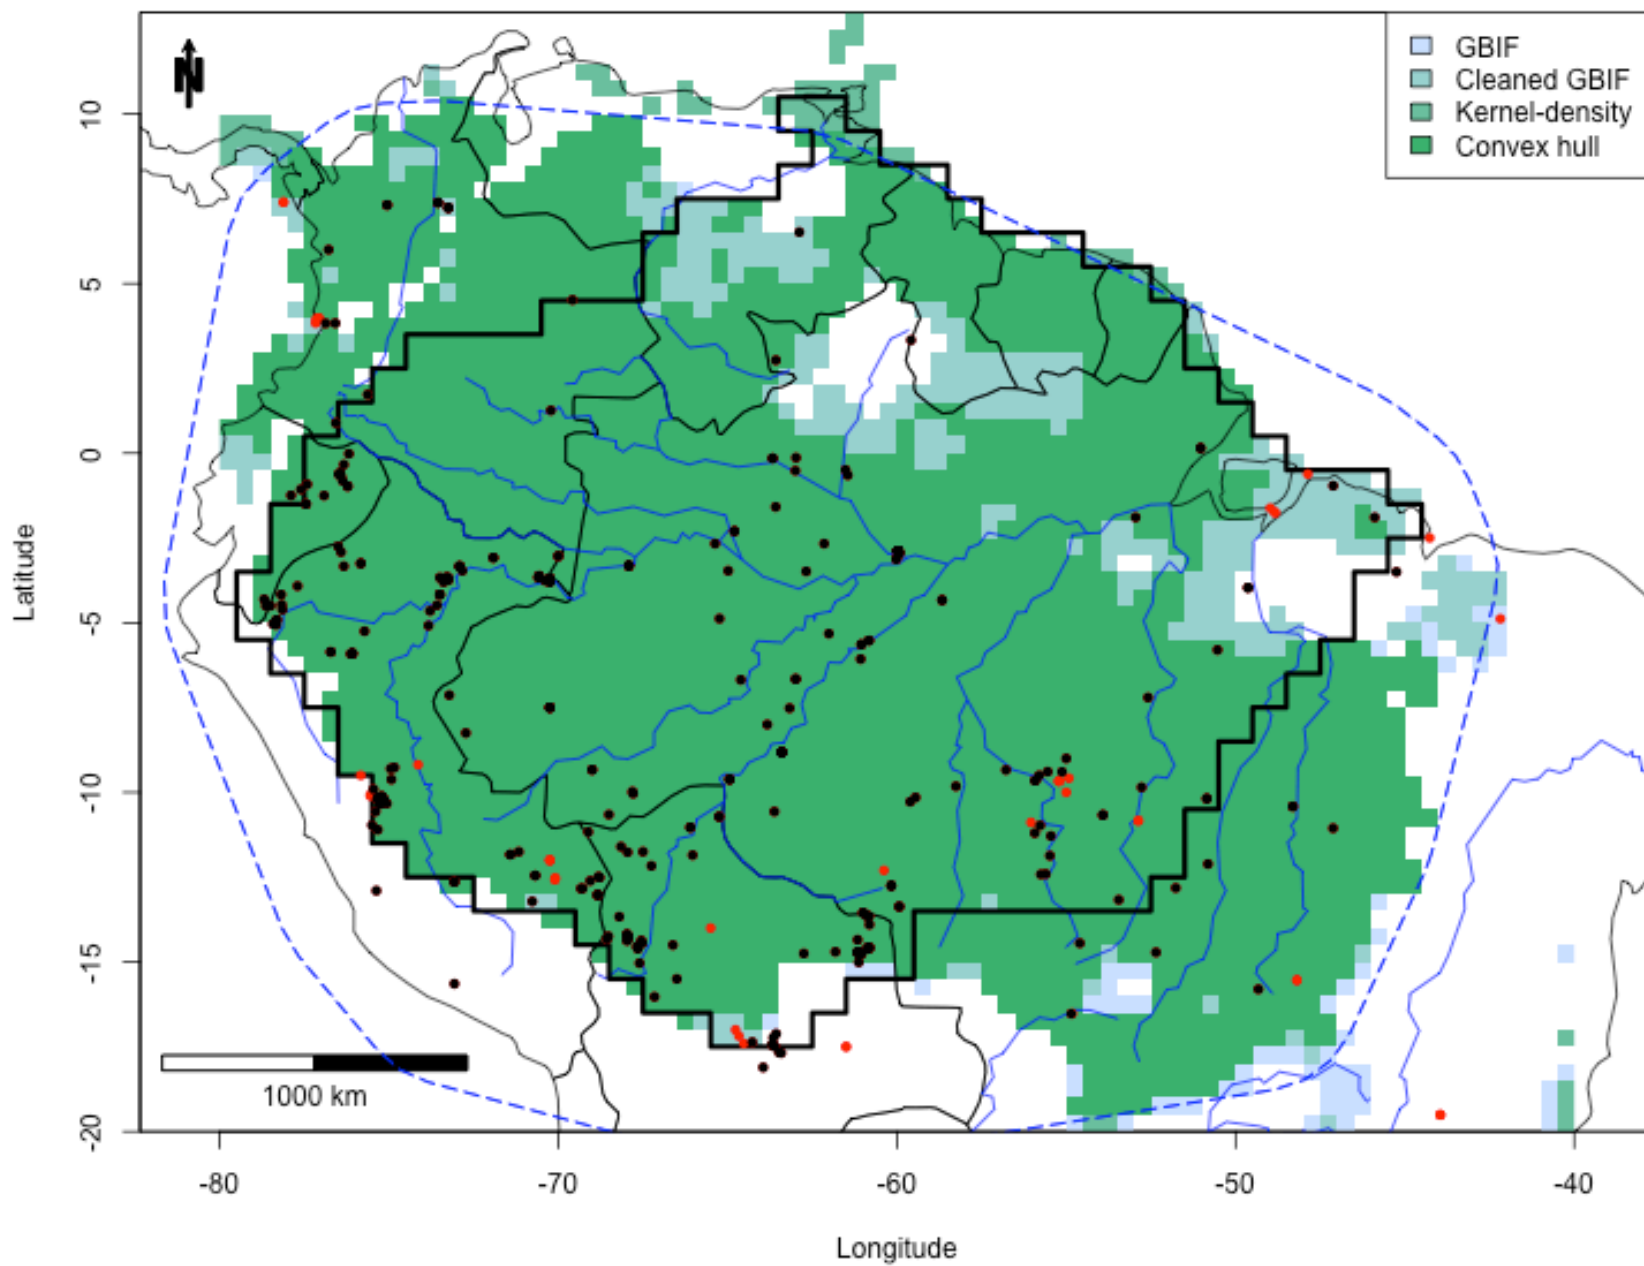



# Hirtella racemosa

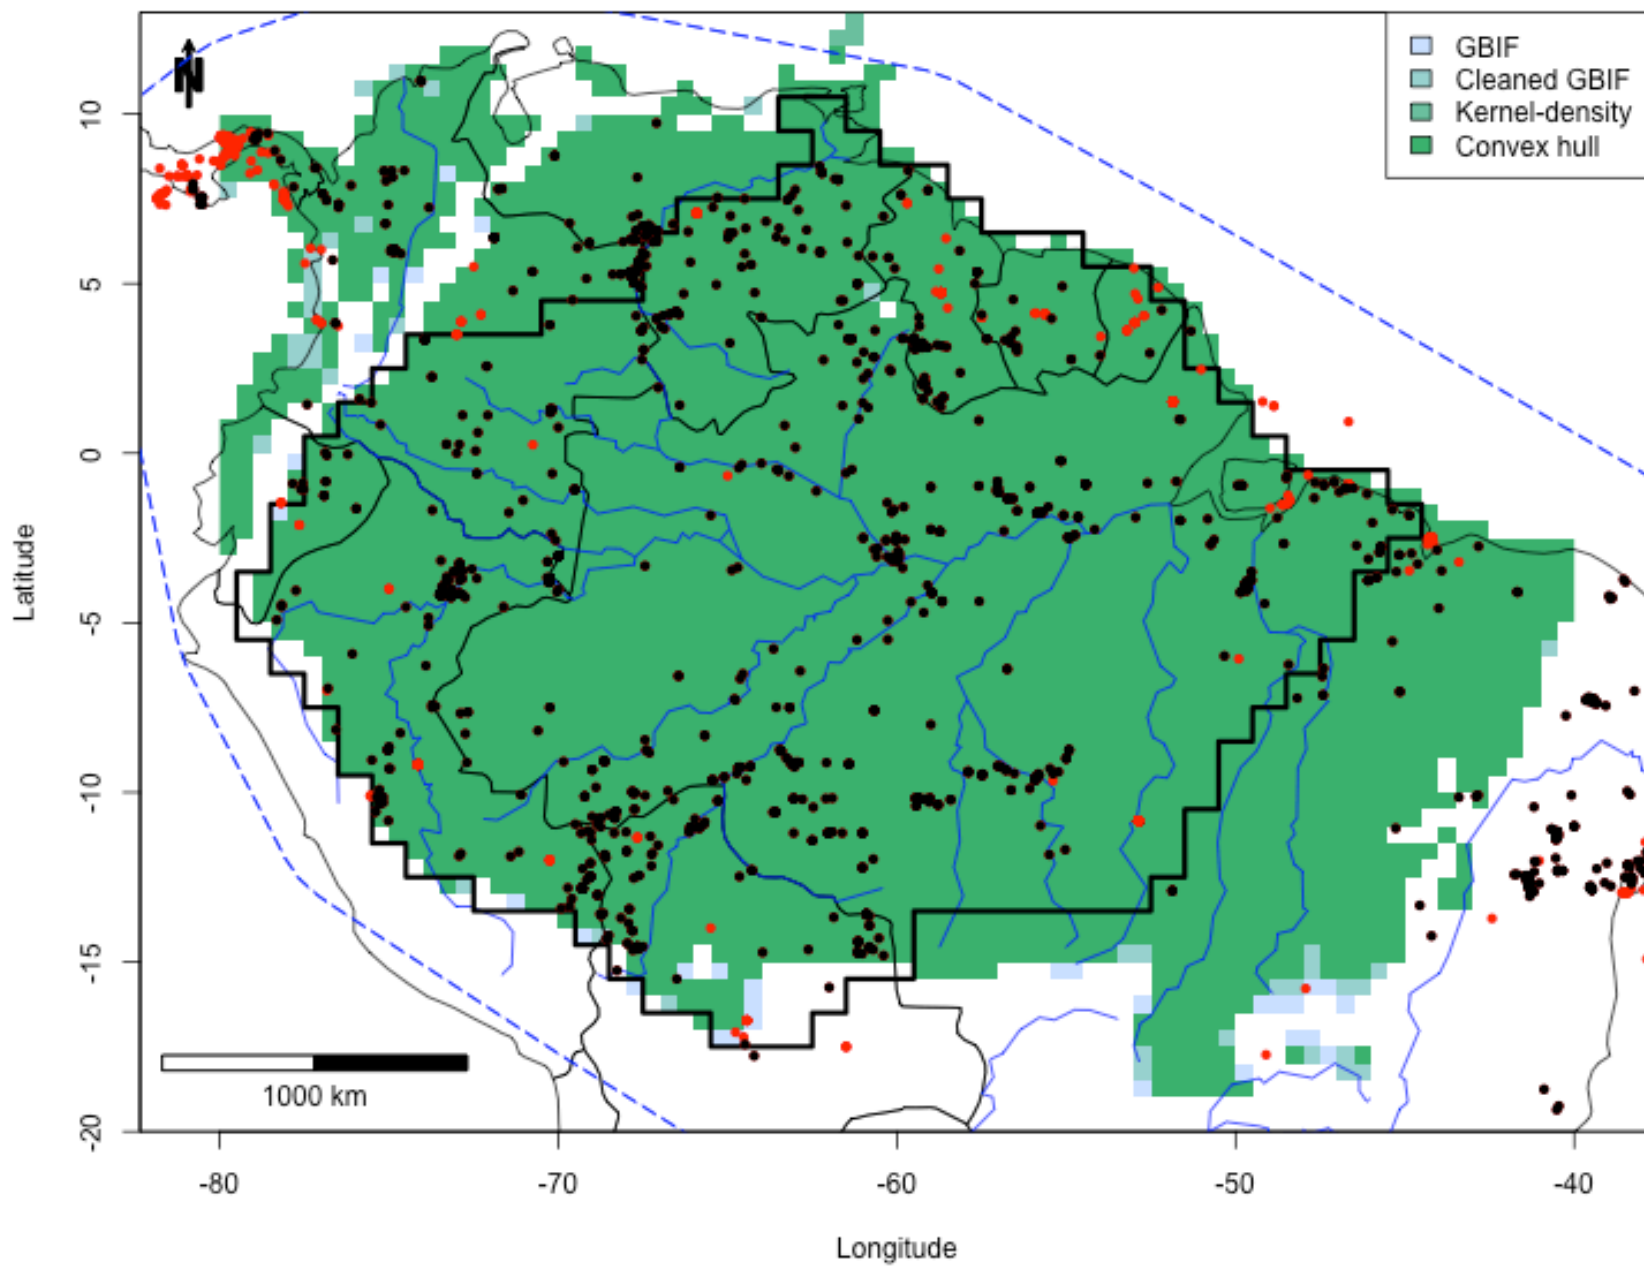

# Hura crepitans

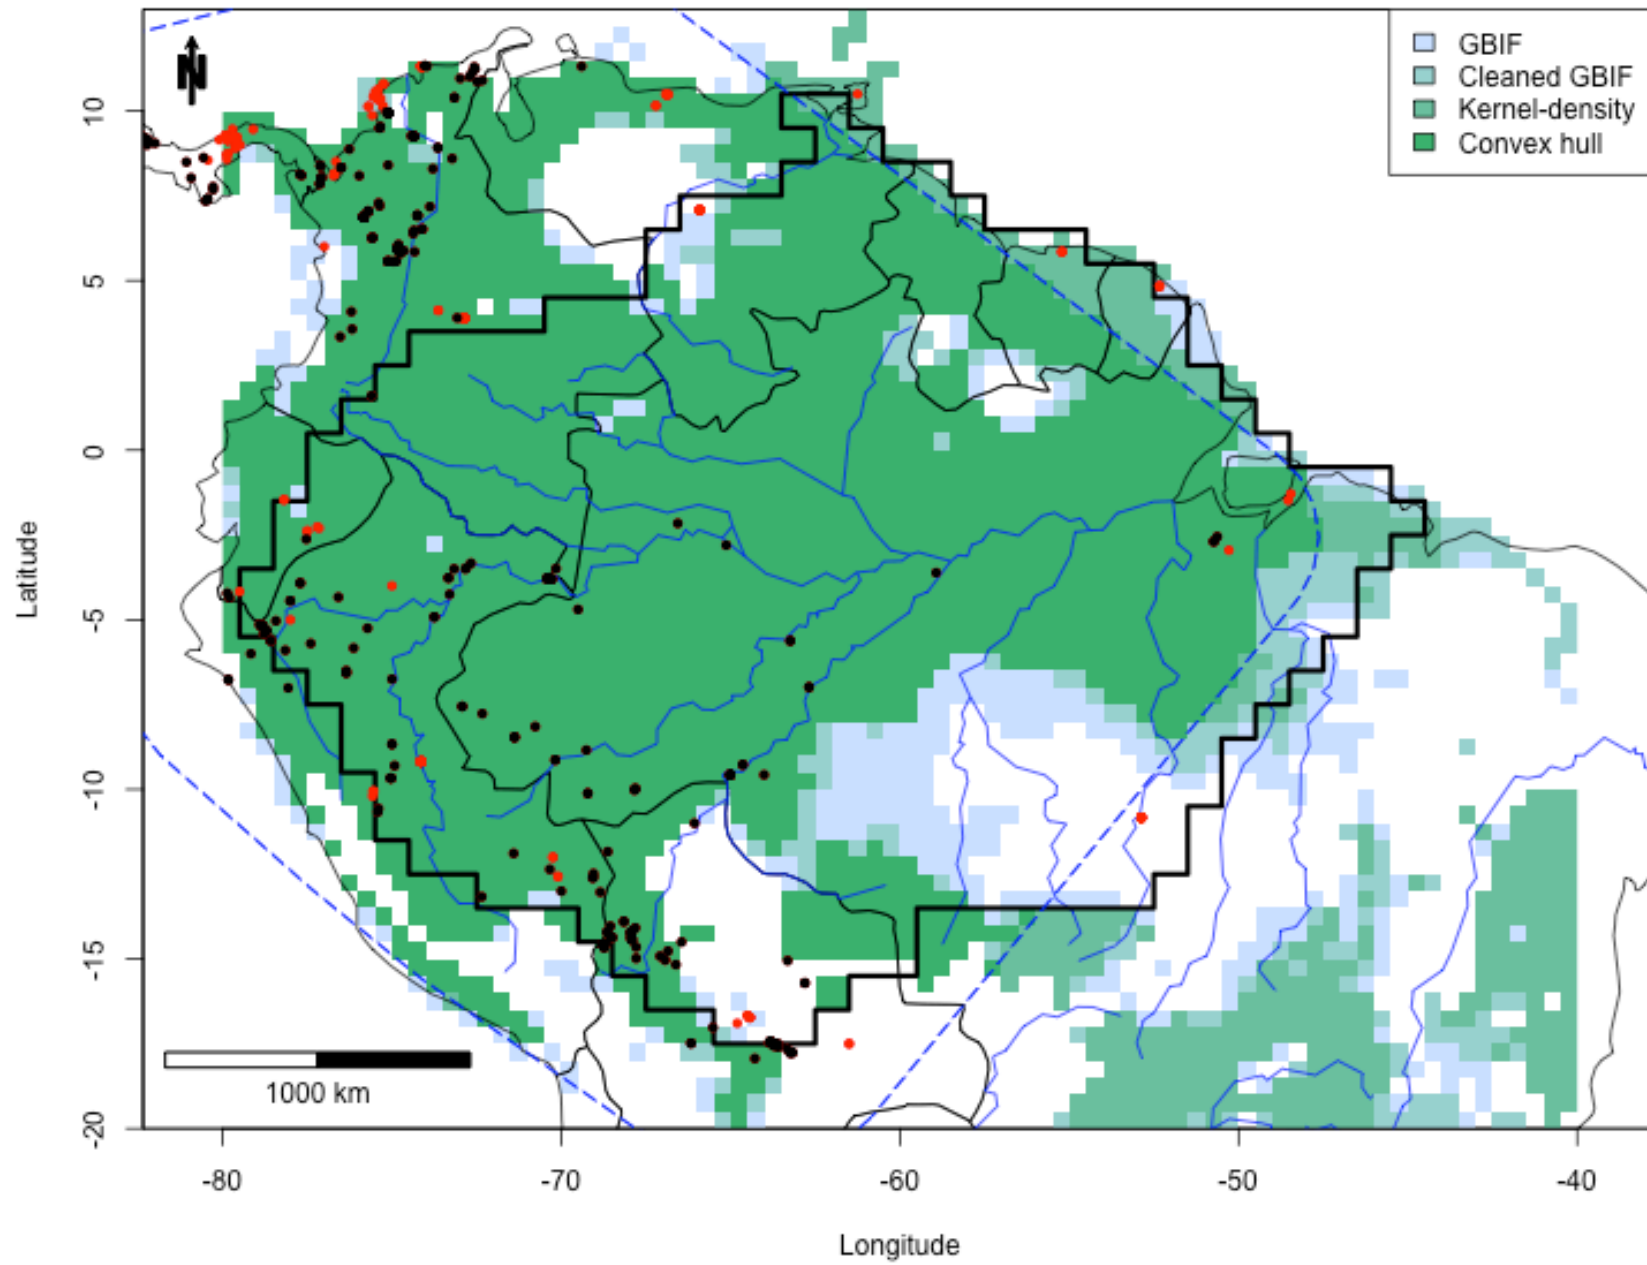

# Inga alba

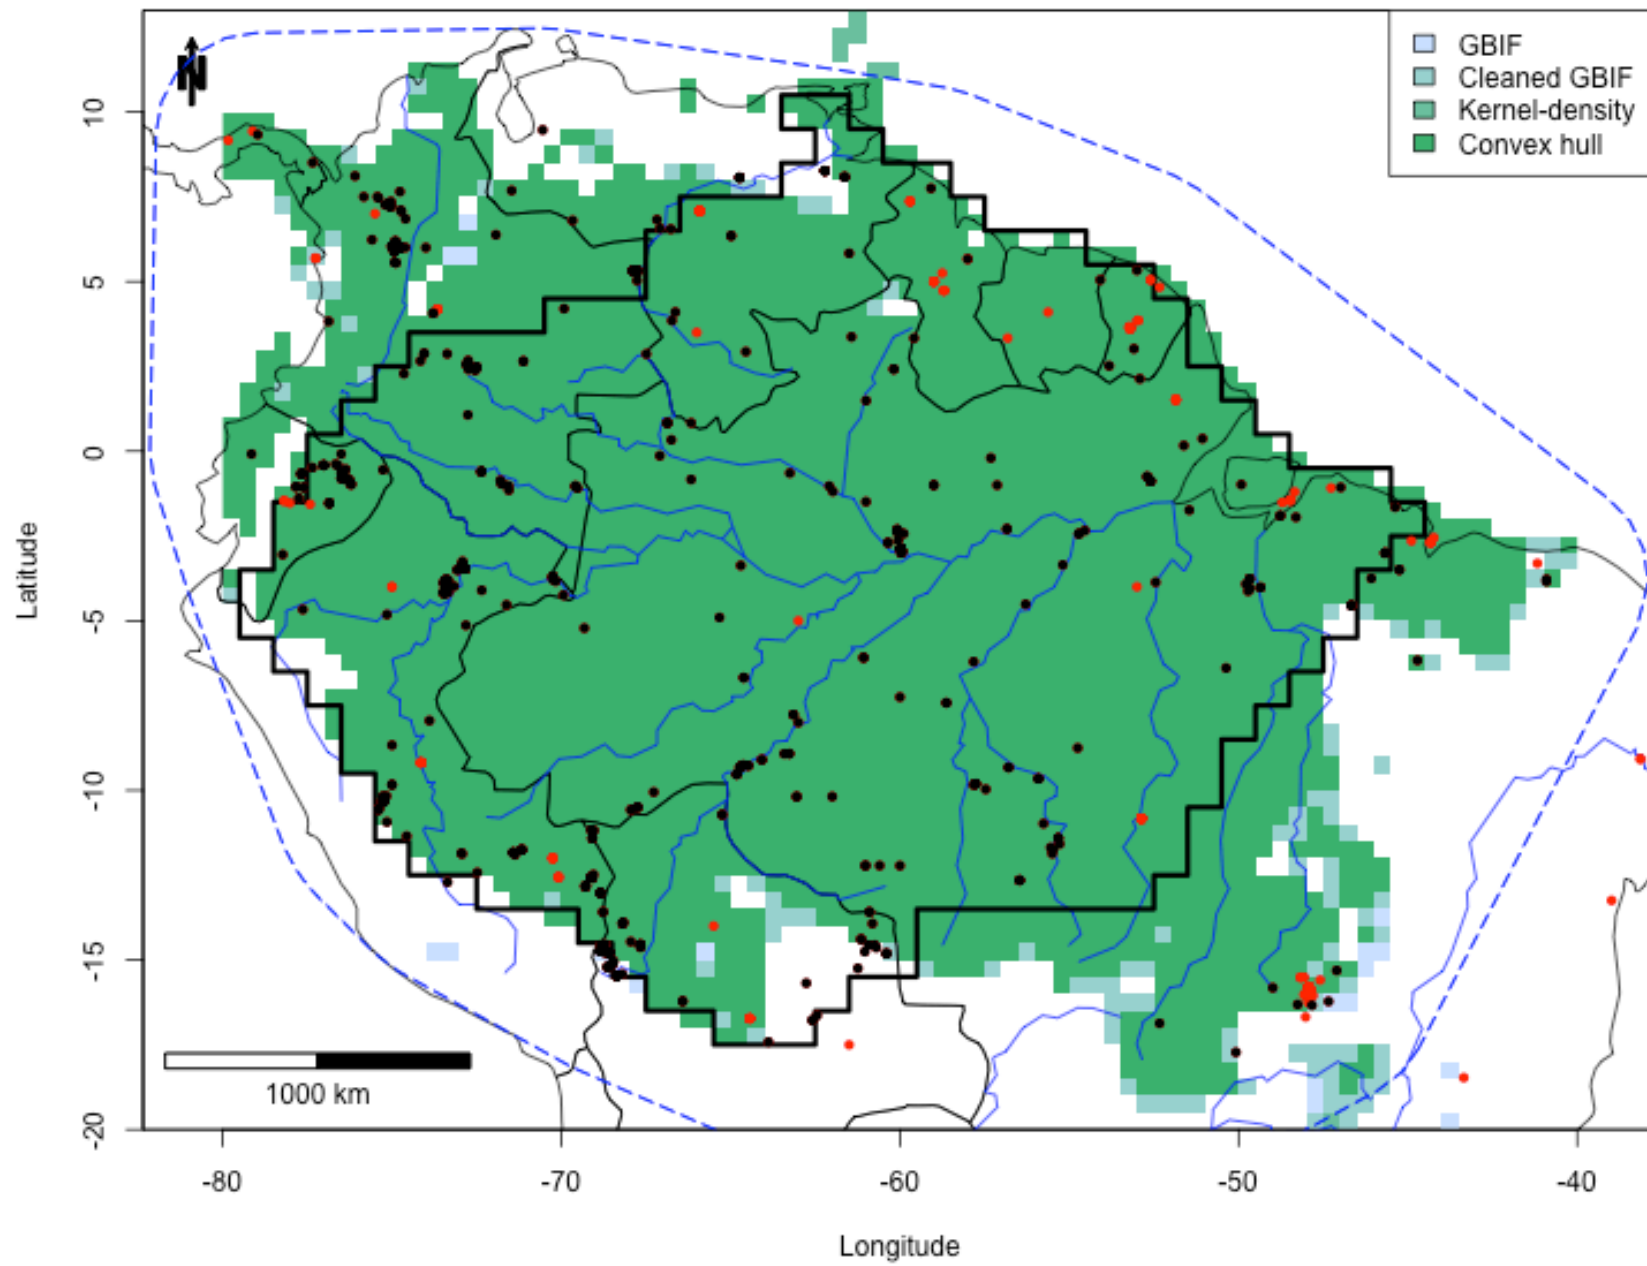

# Inga capitata

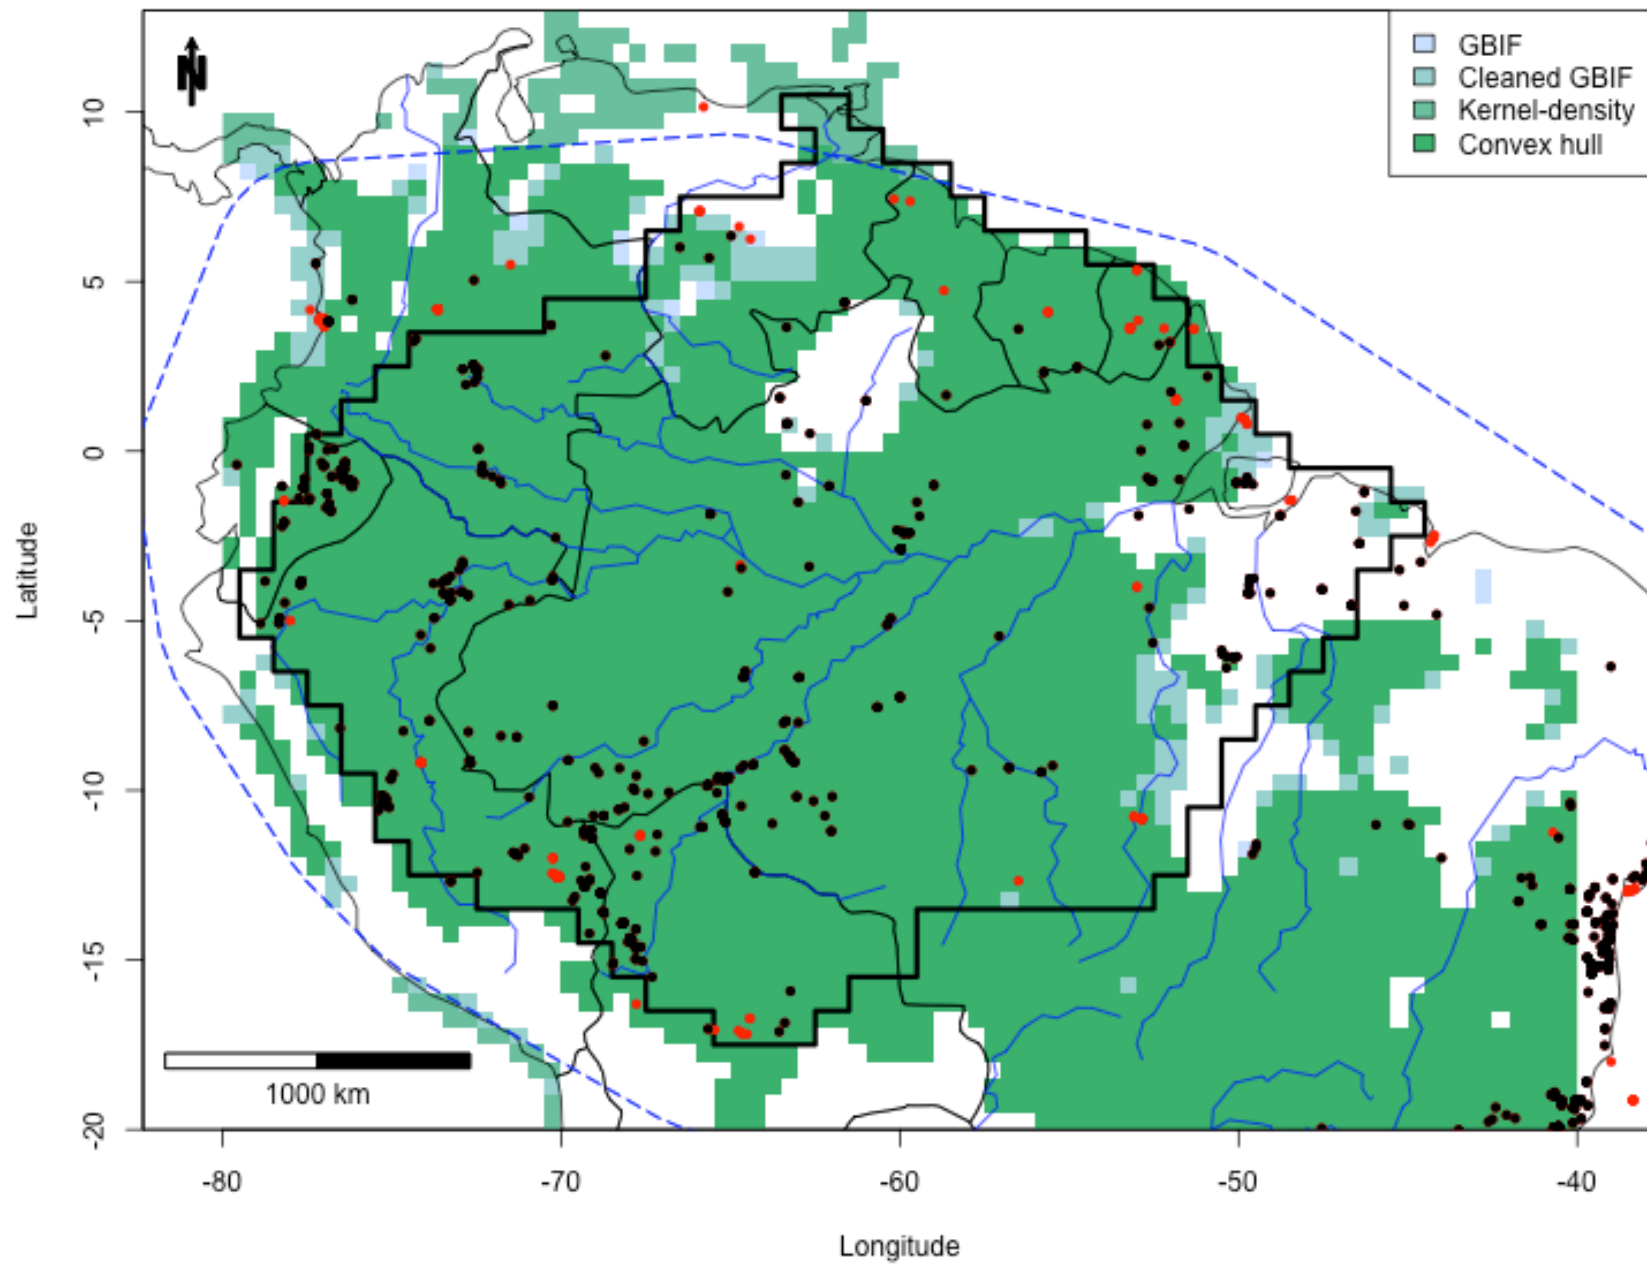

# Inga edulis

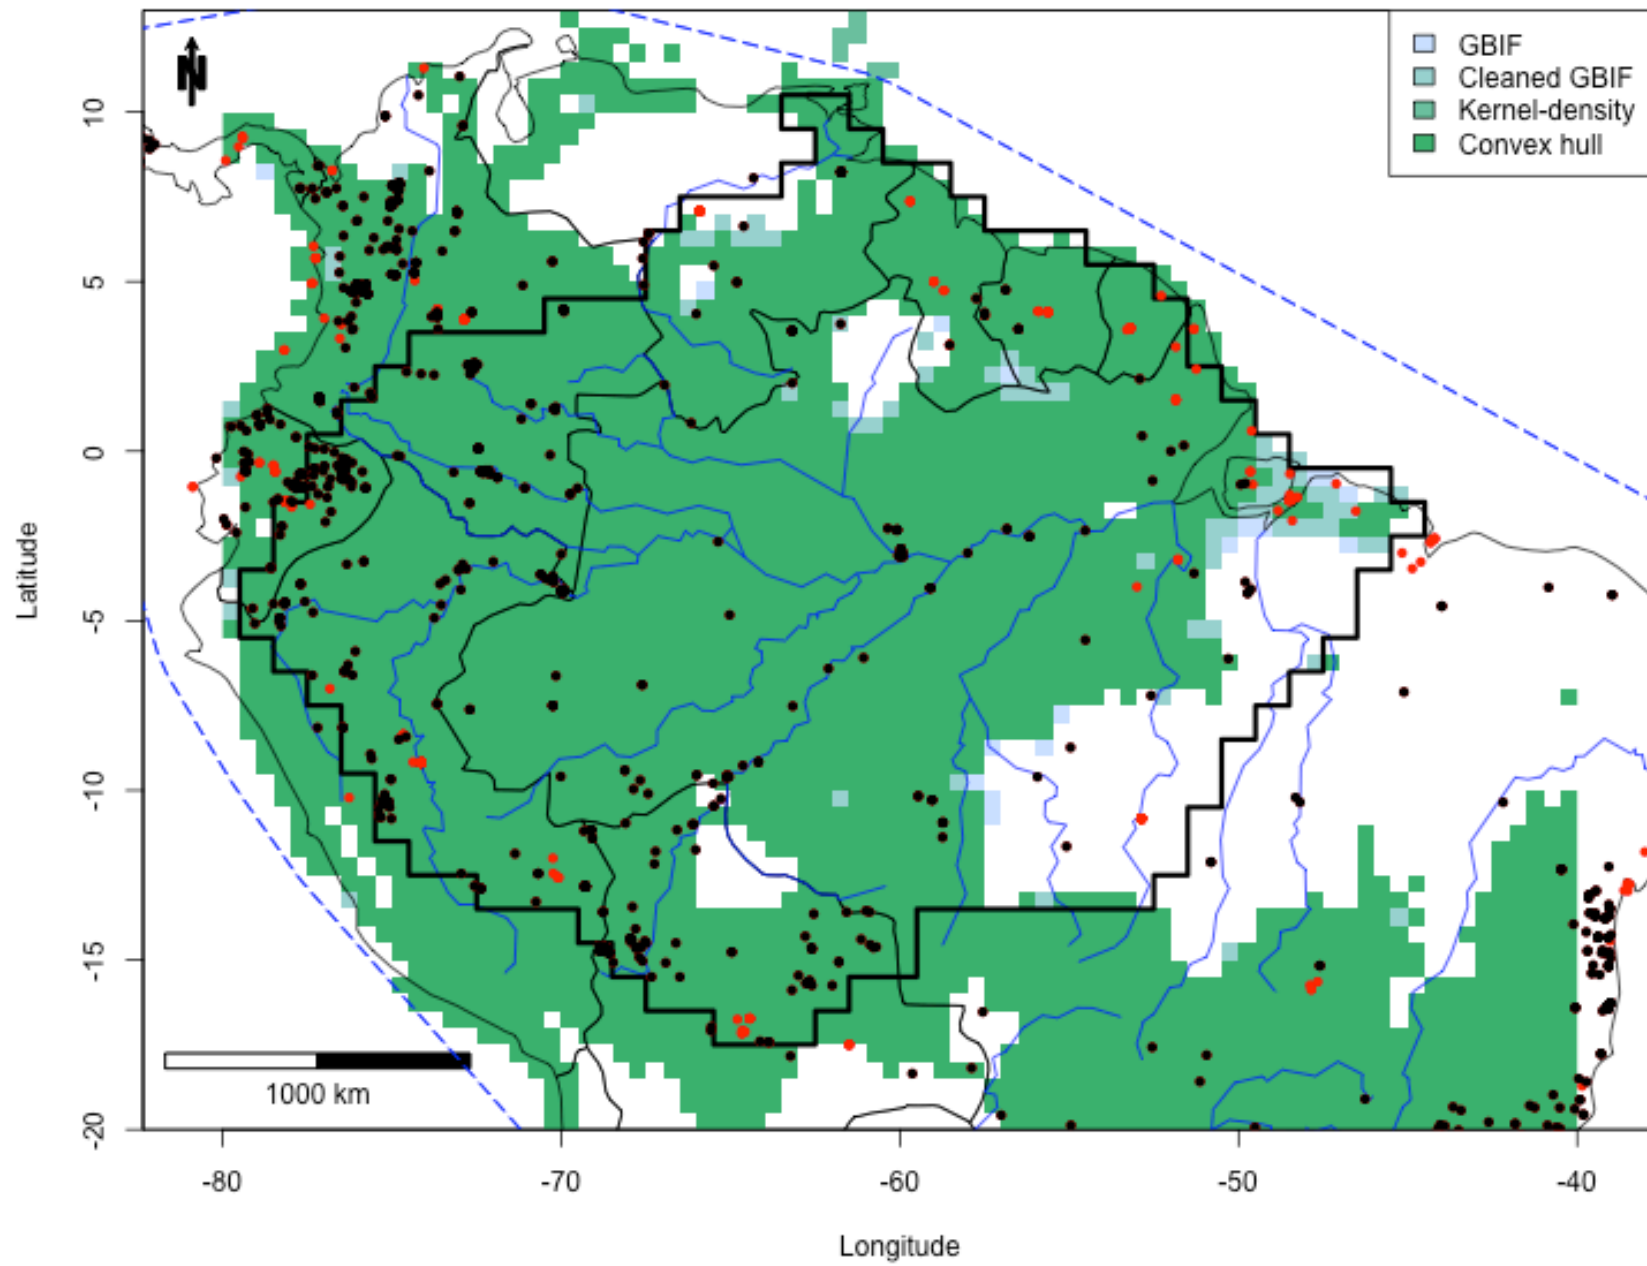

# Inga lateriflora

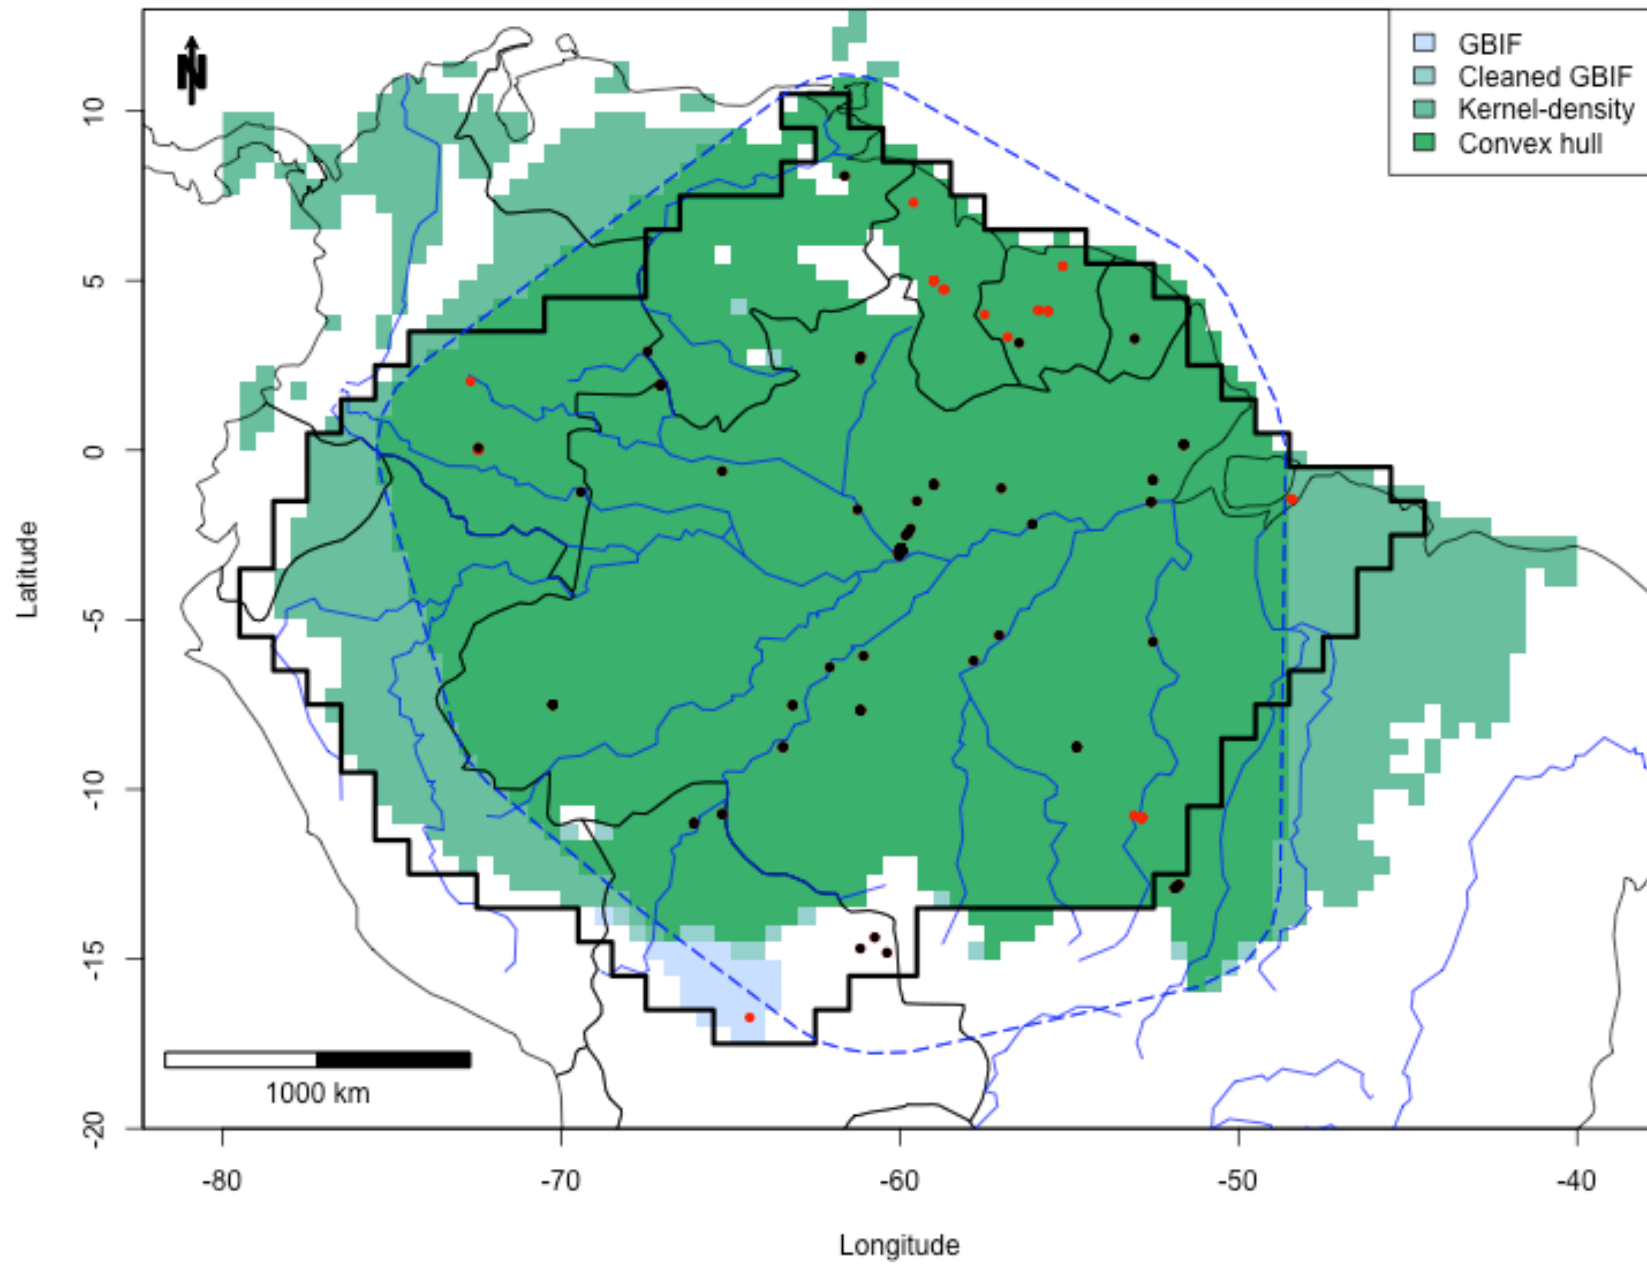

# Inga marginata

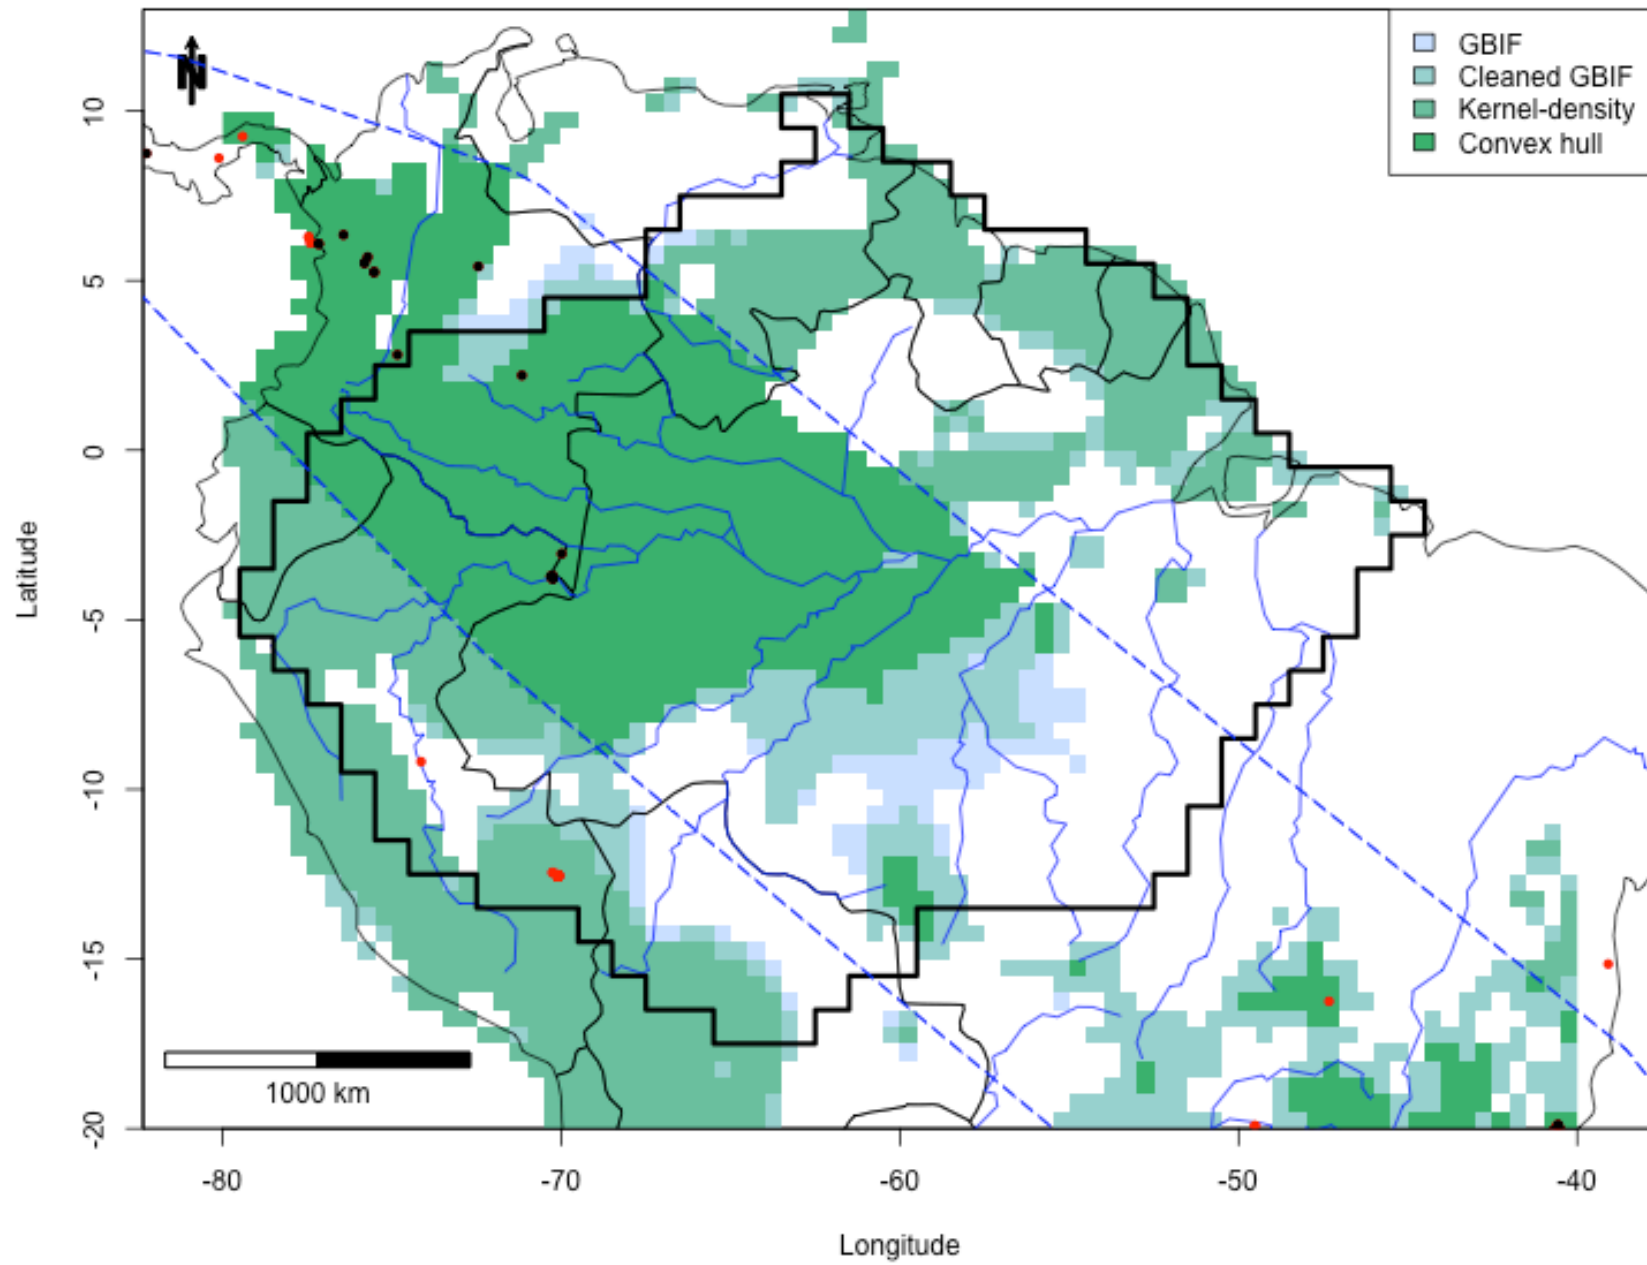



# Inga rubiginosa

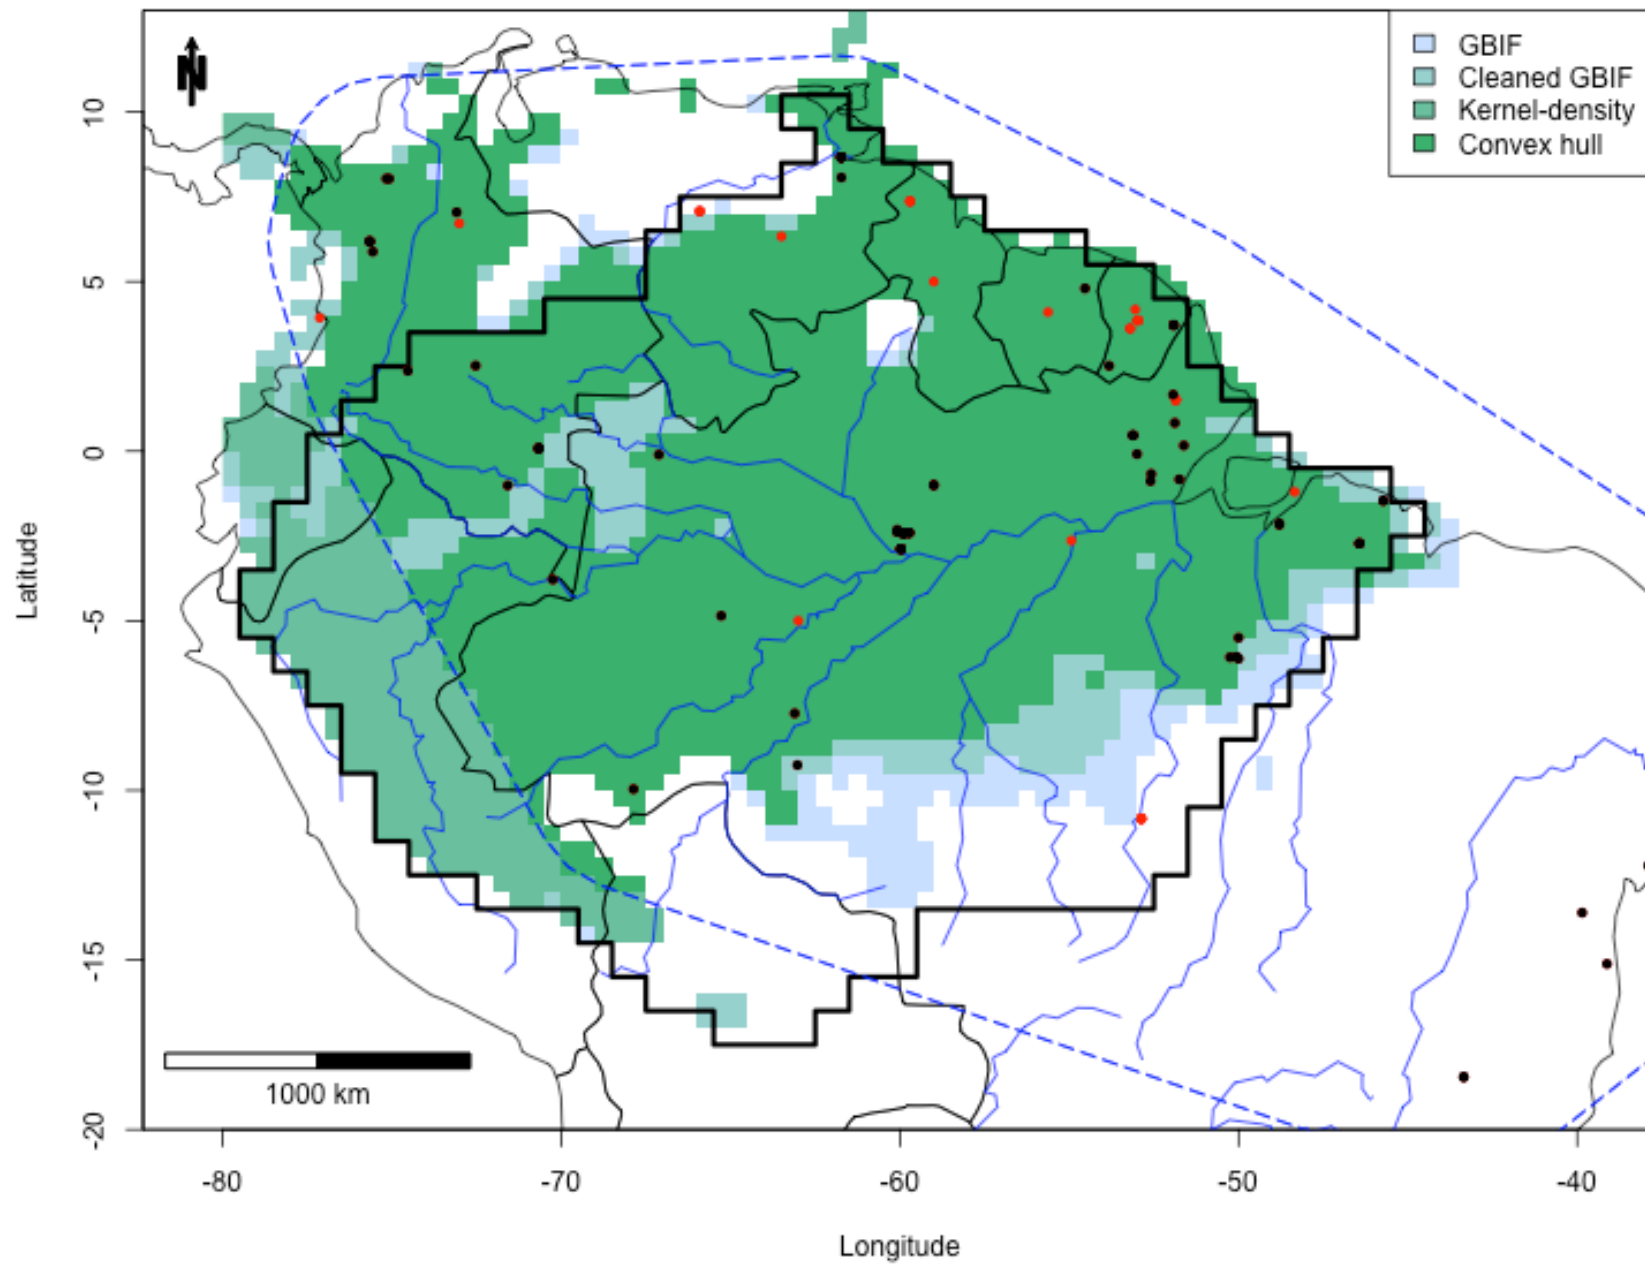



# Inga thibaudiana

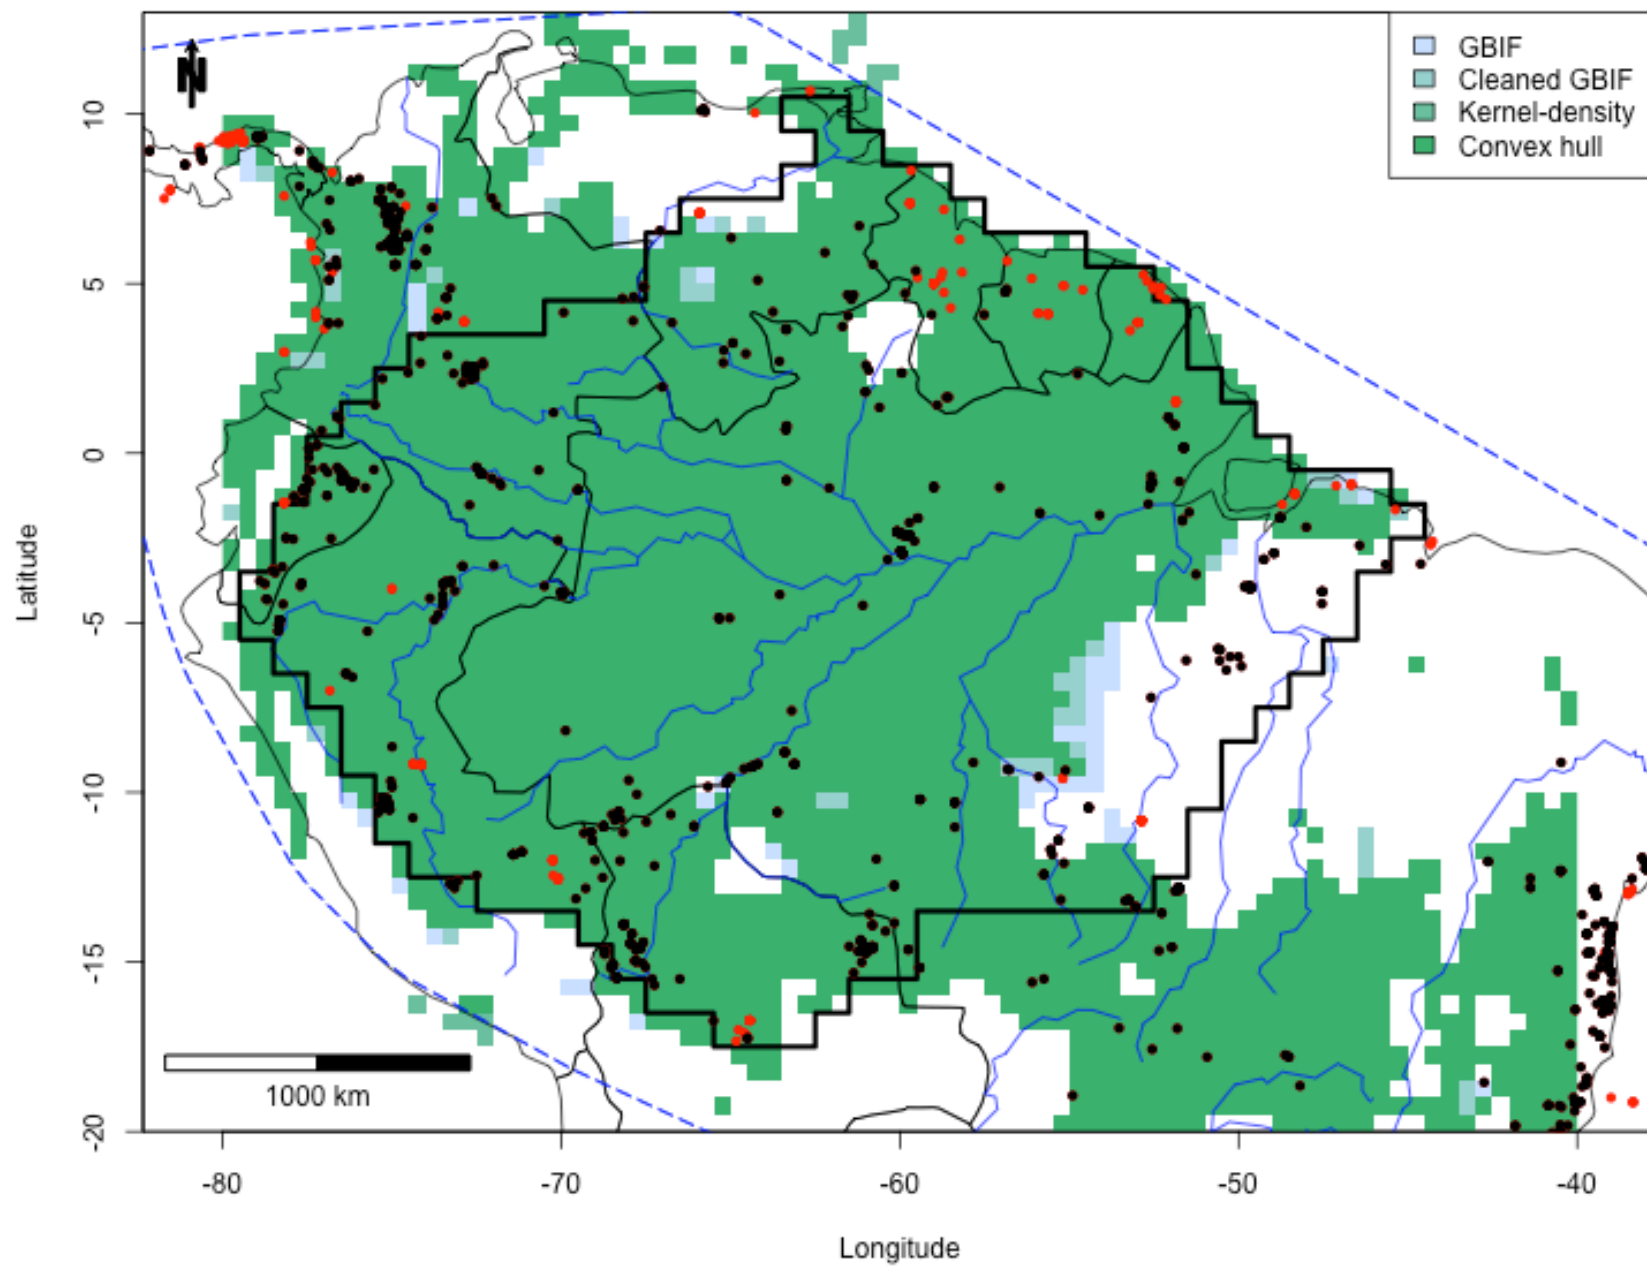

# Iriartea deltoidea

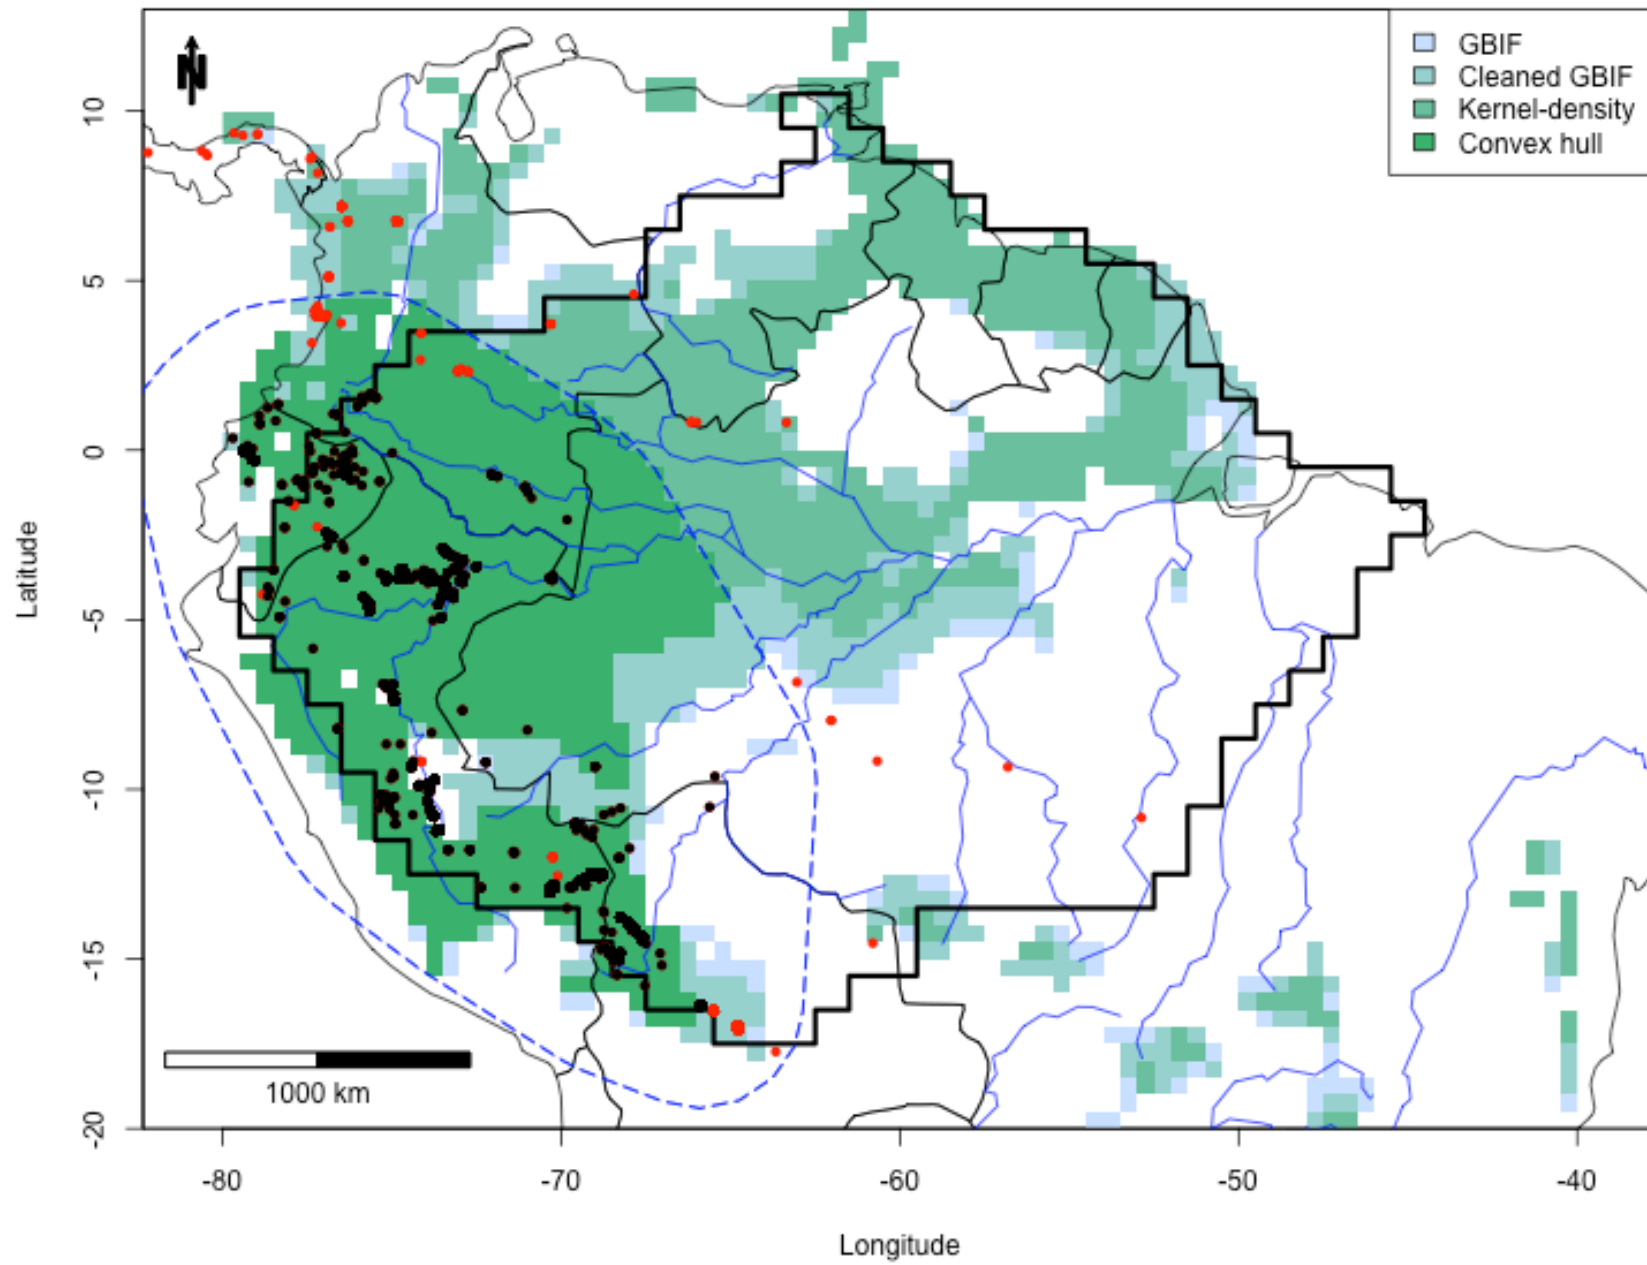

# *Iryanthera juruensis*

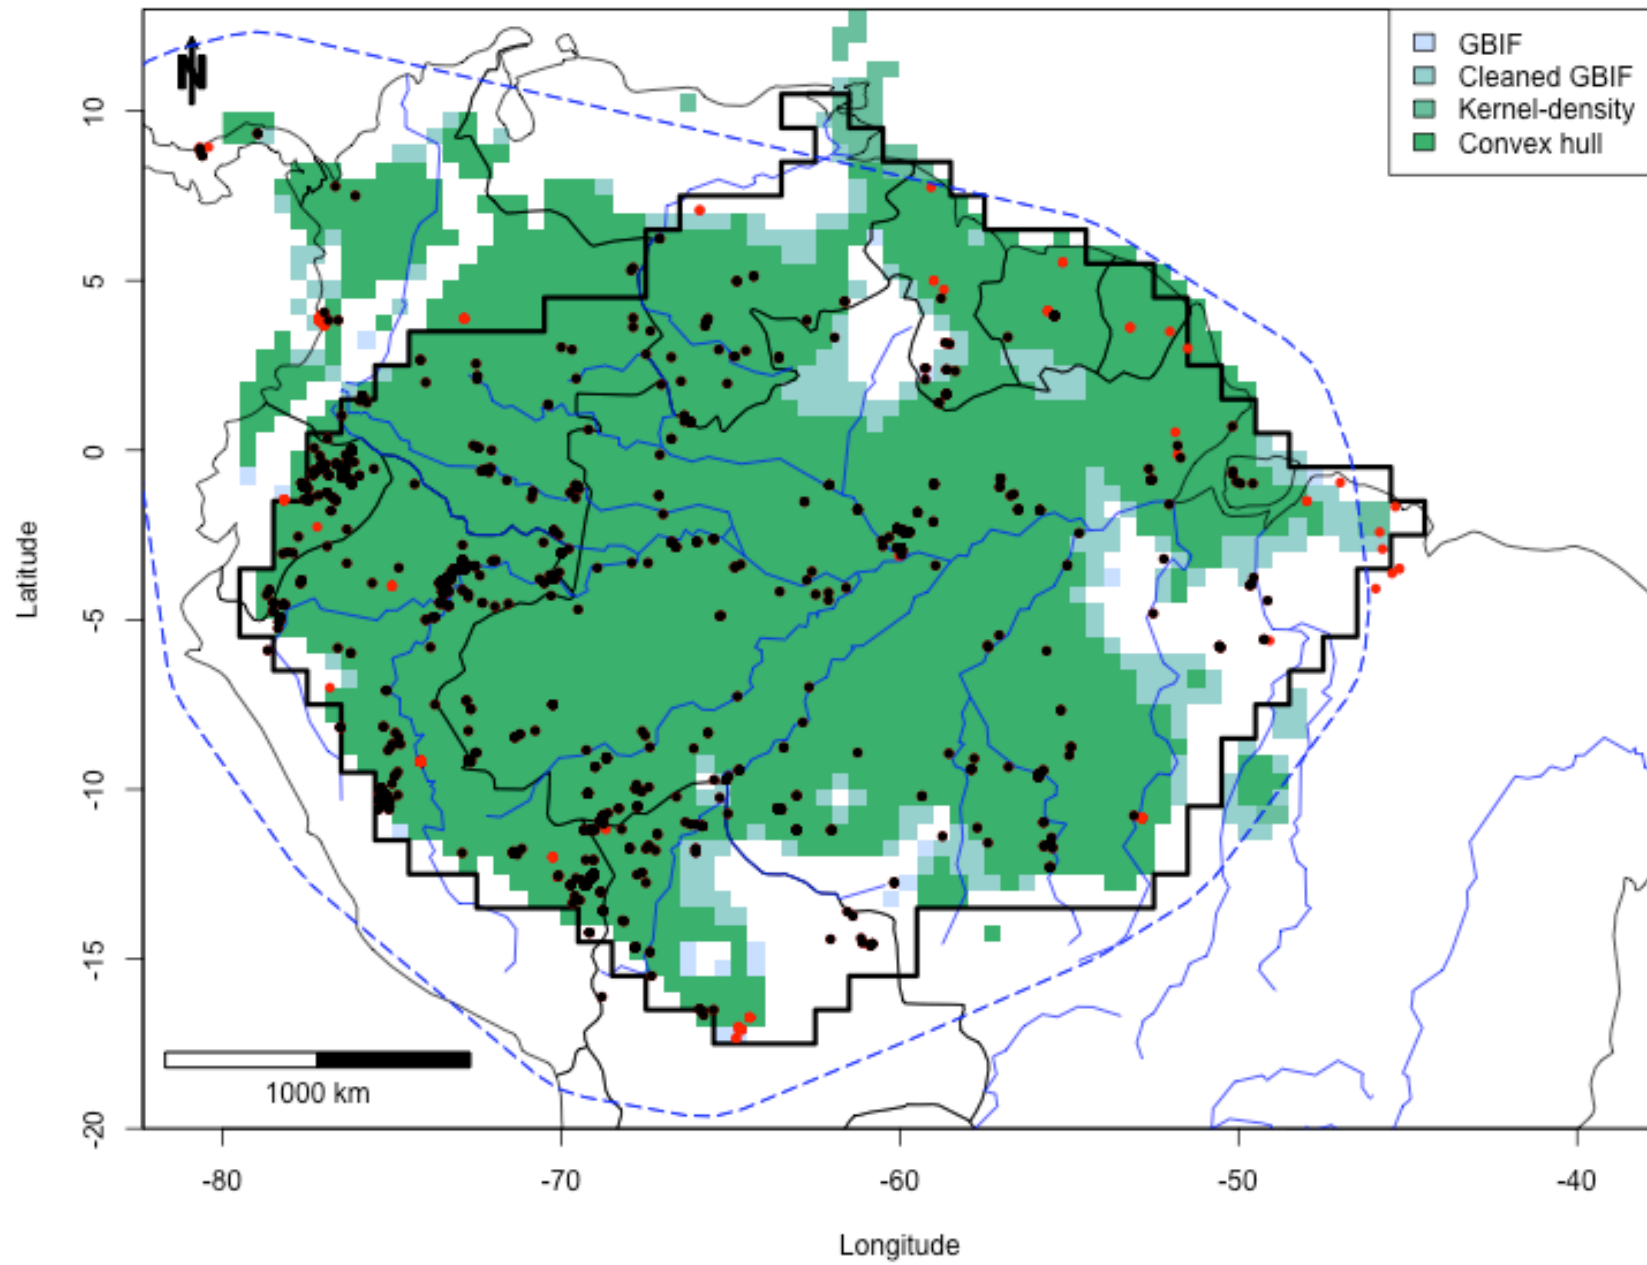

# *Iryanthera laevis*

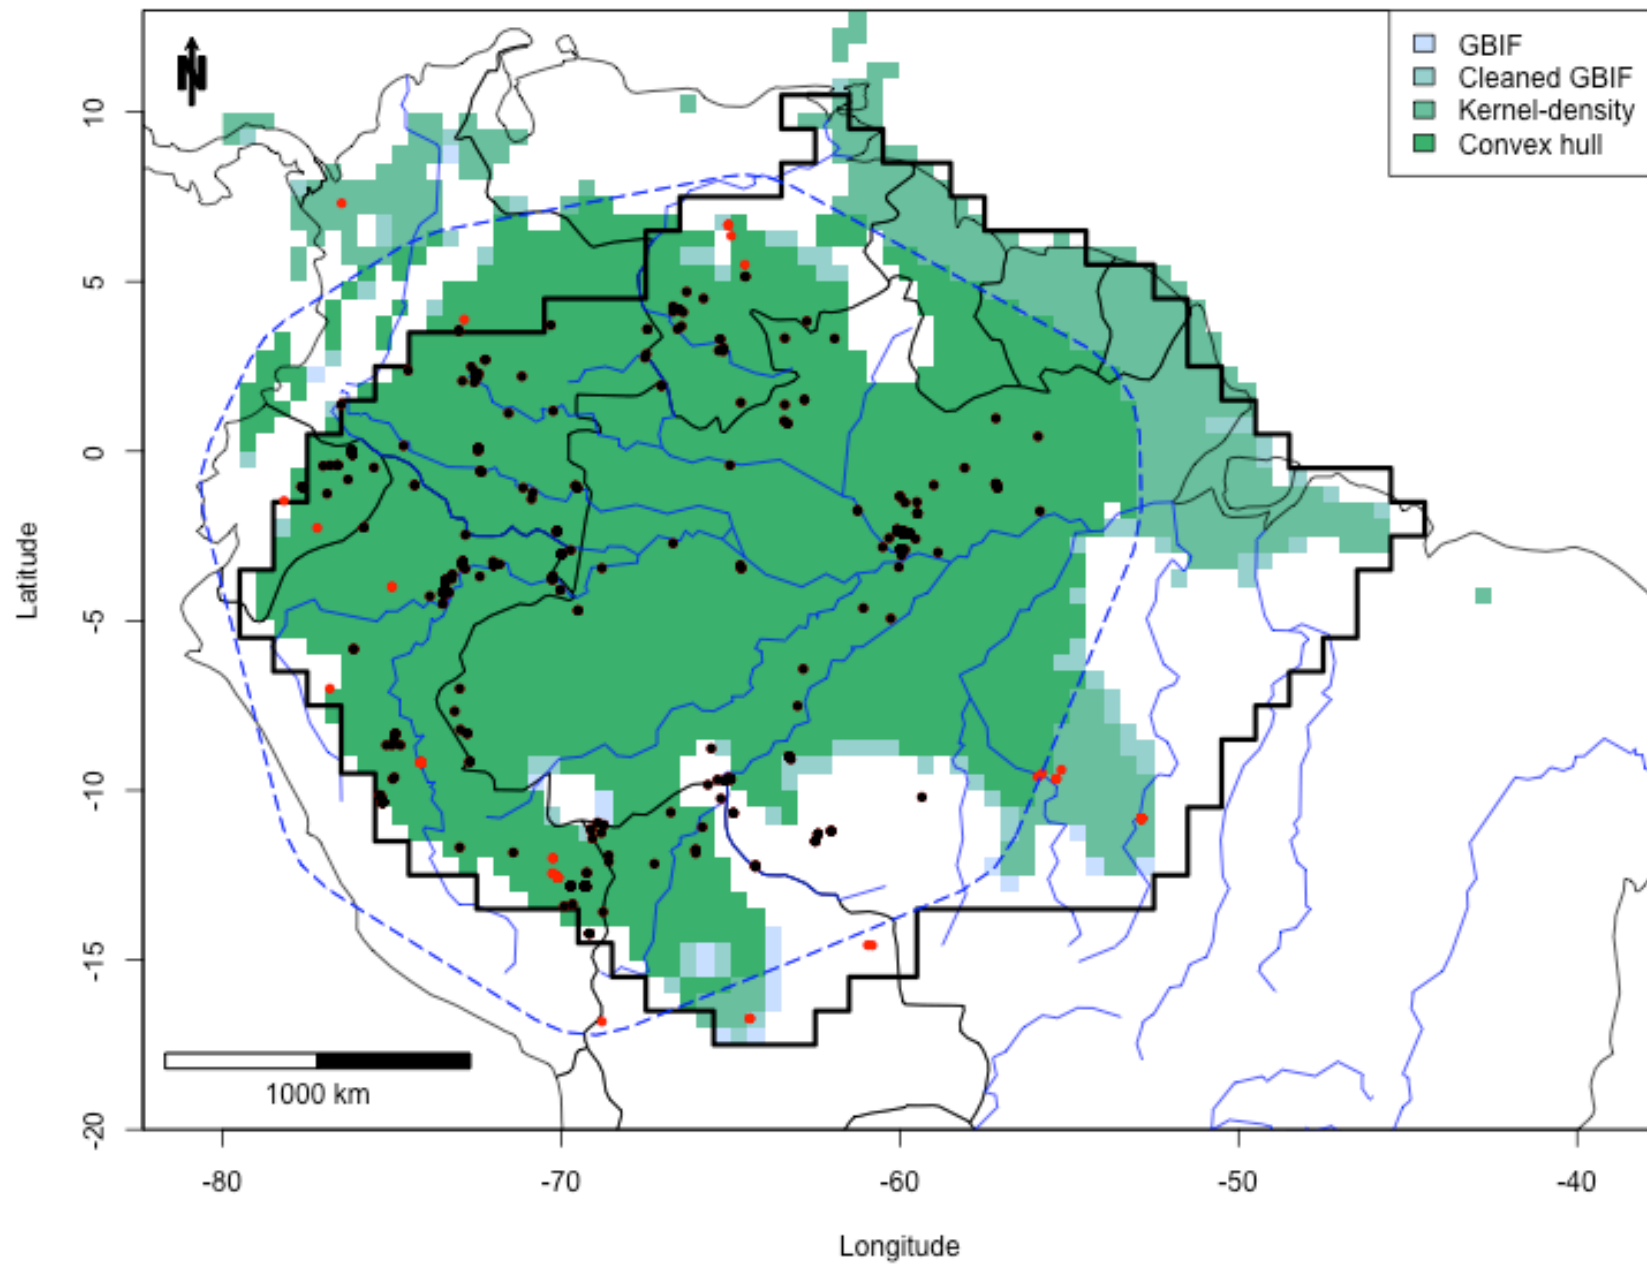

# *Iryanthera ulei*

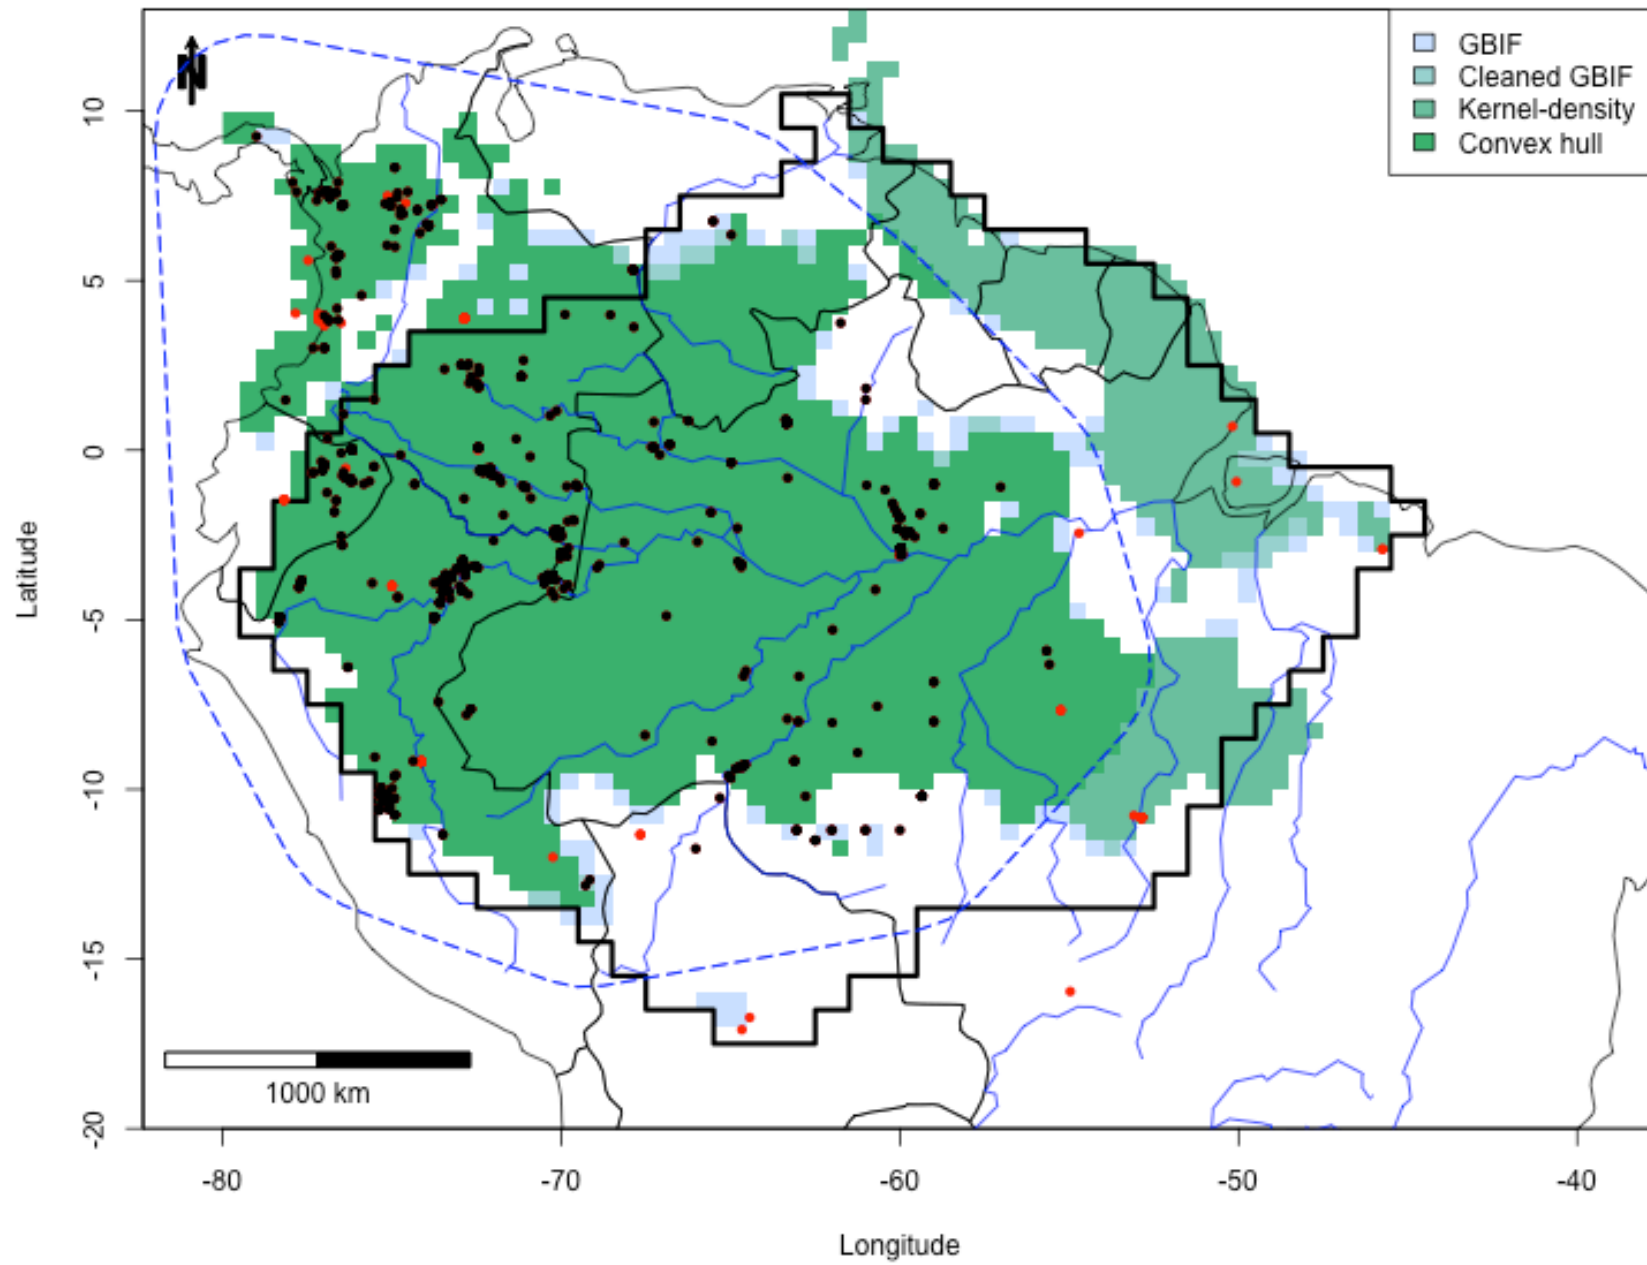

# Jacaranda copaia

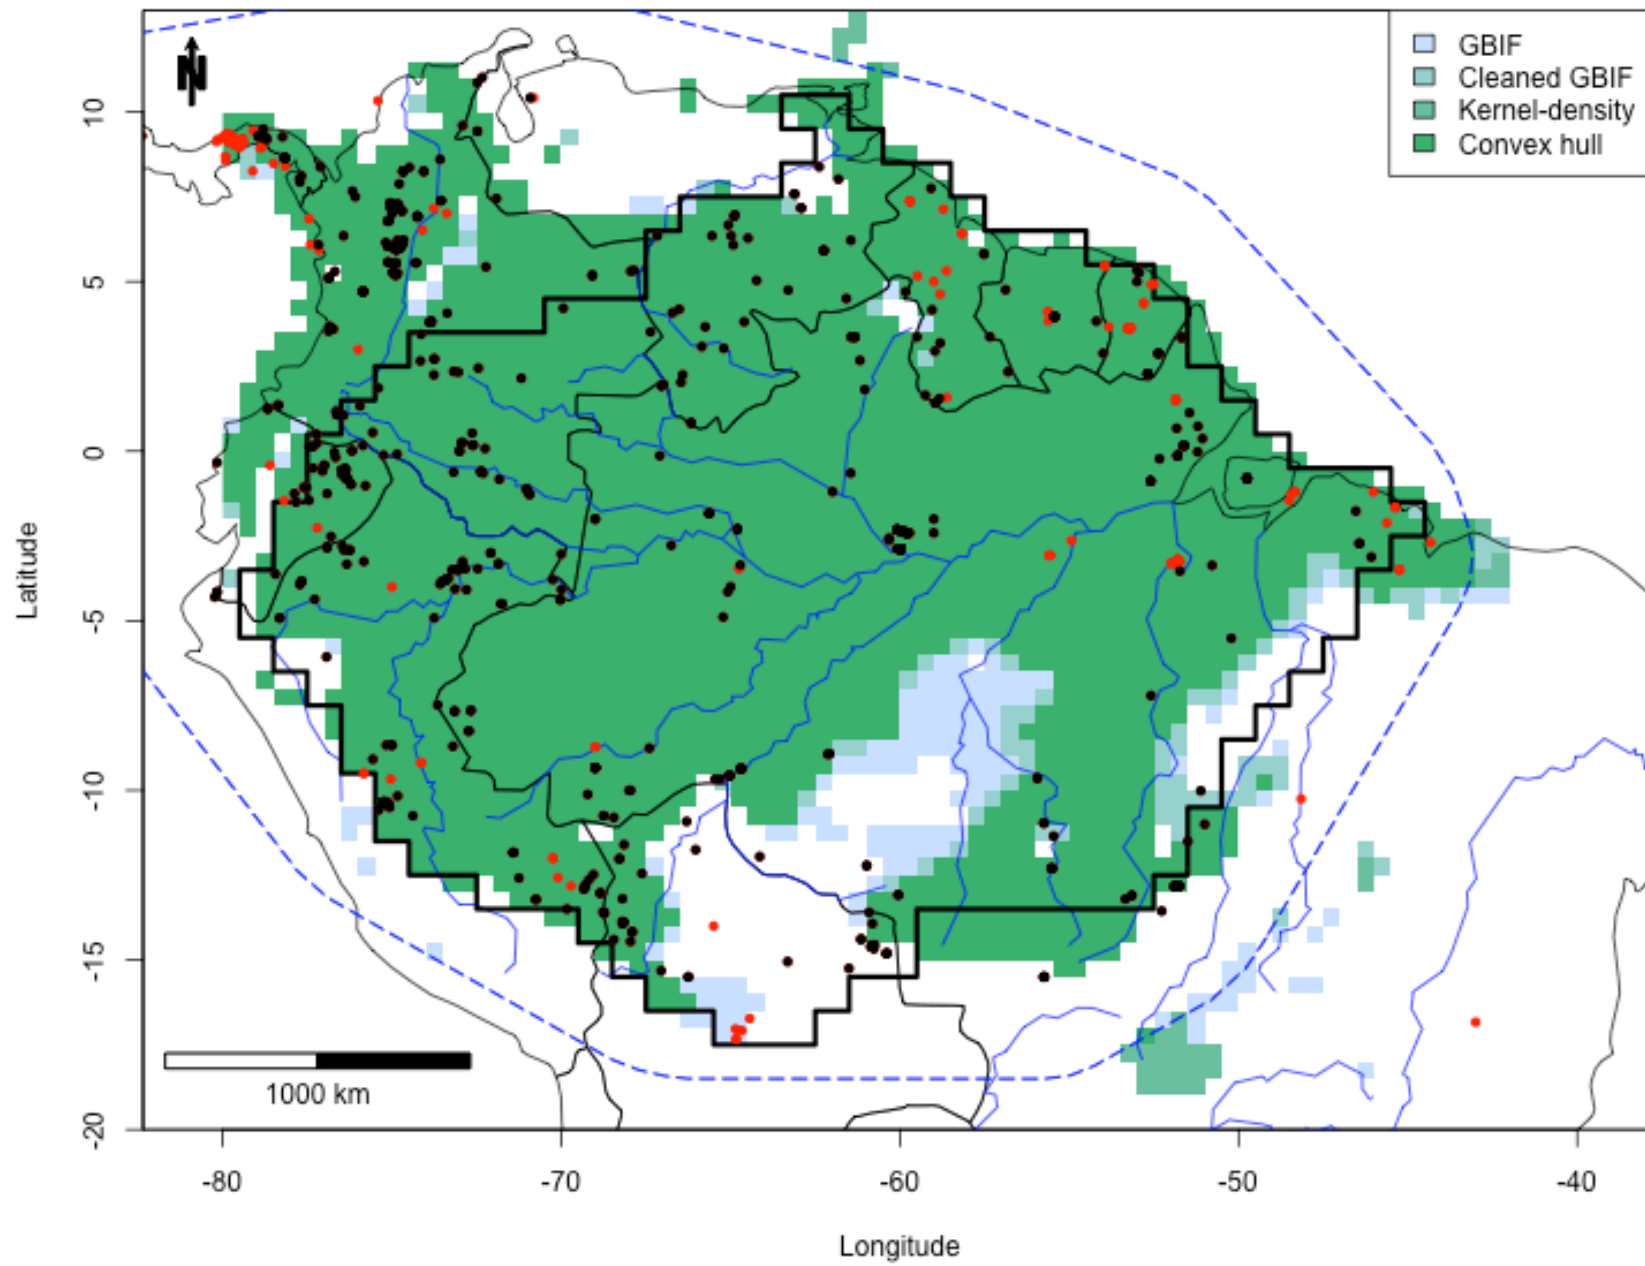

# Laetia corymbulosa

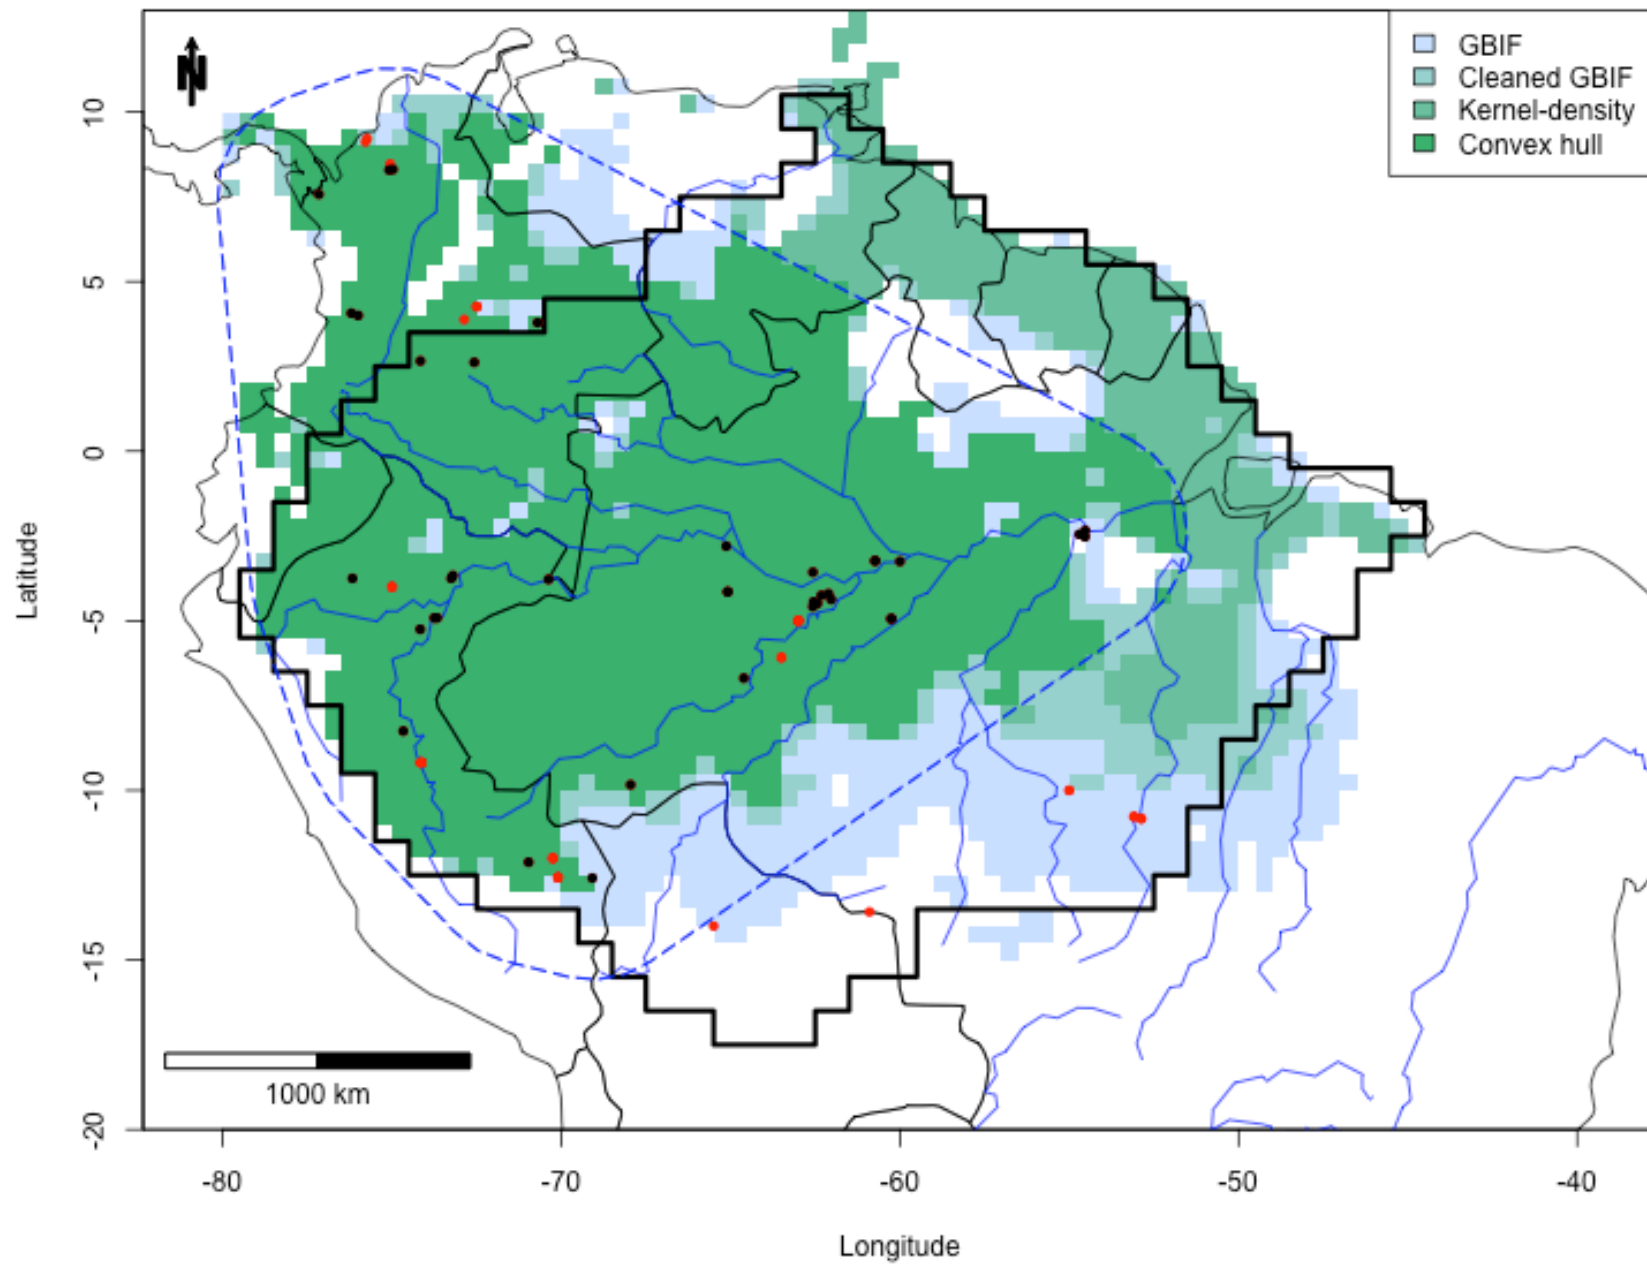



# Laetia procera

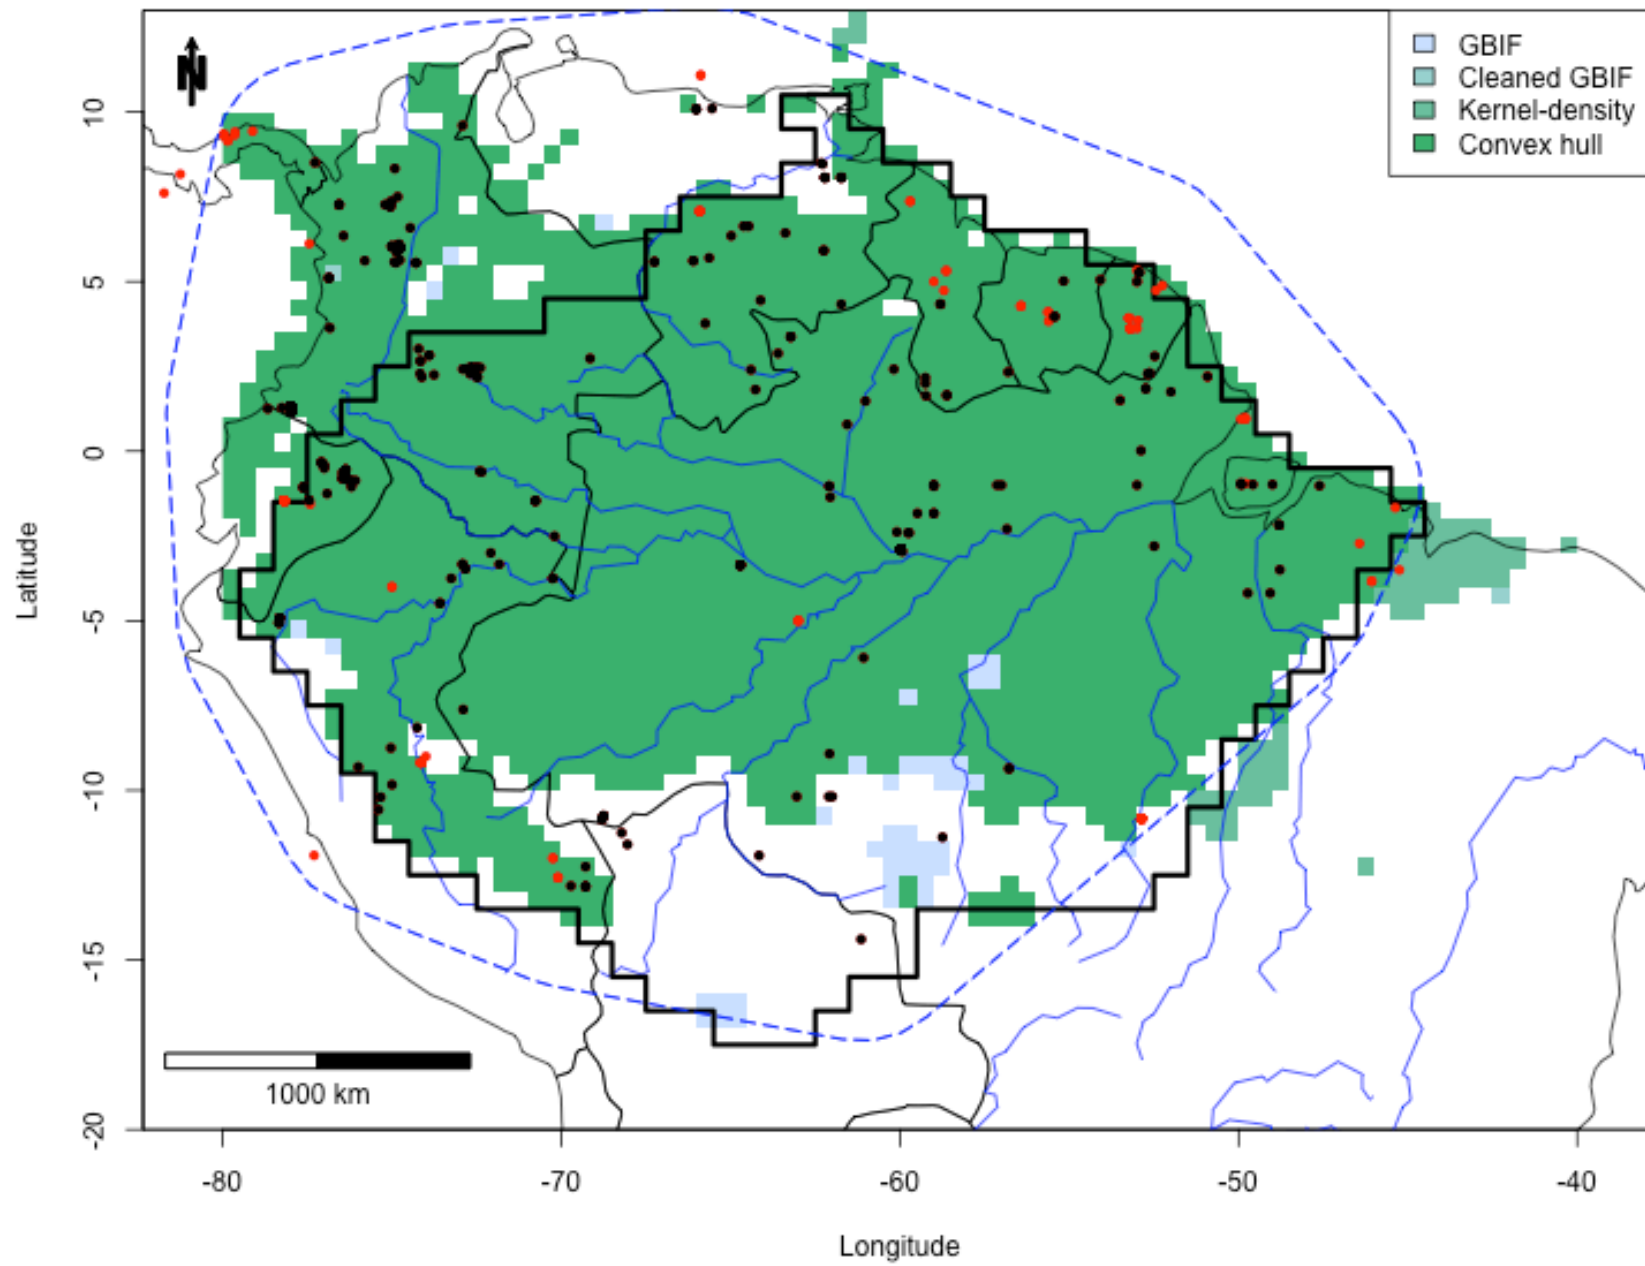



# *Lecythis corrugata*

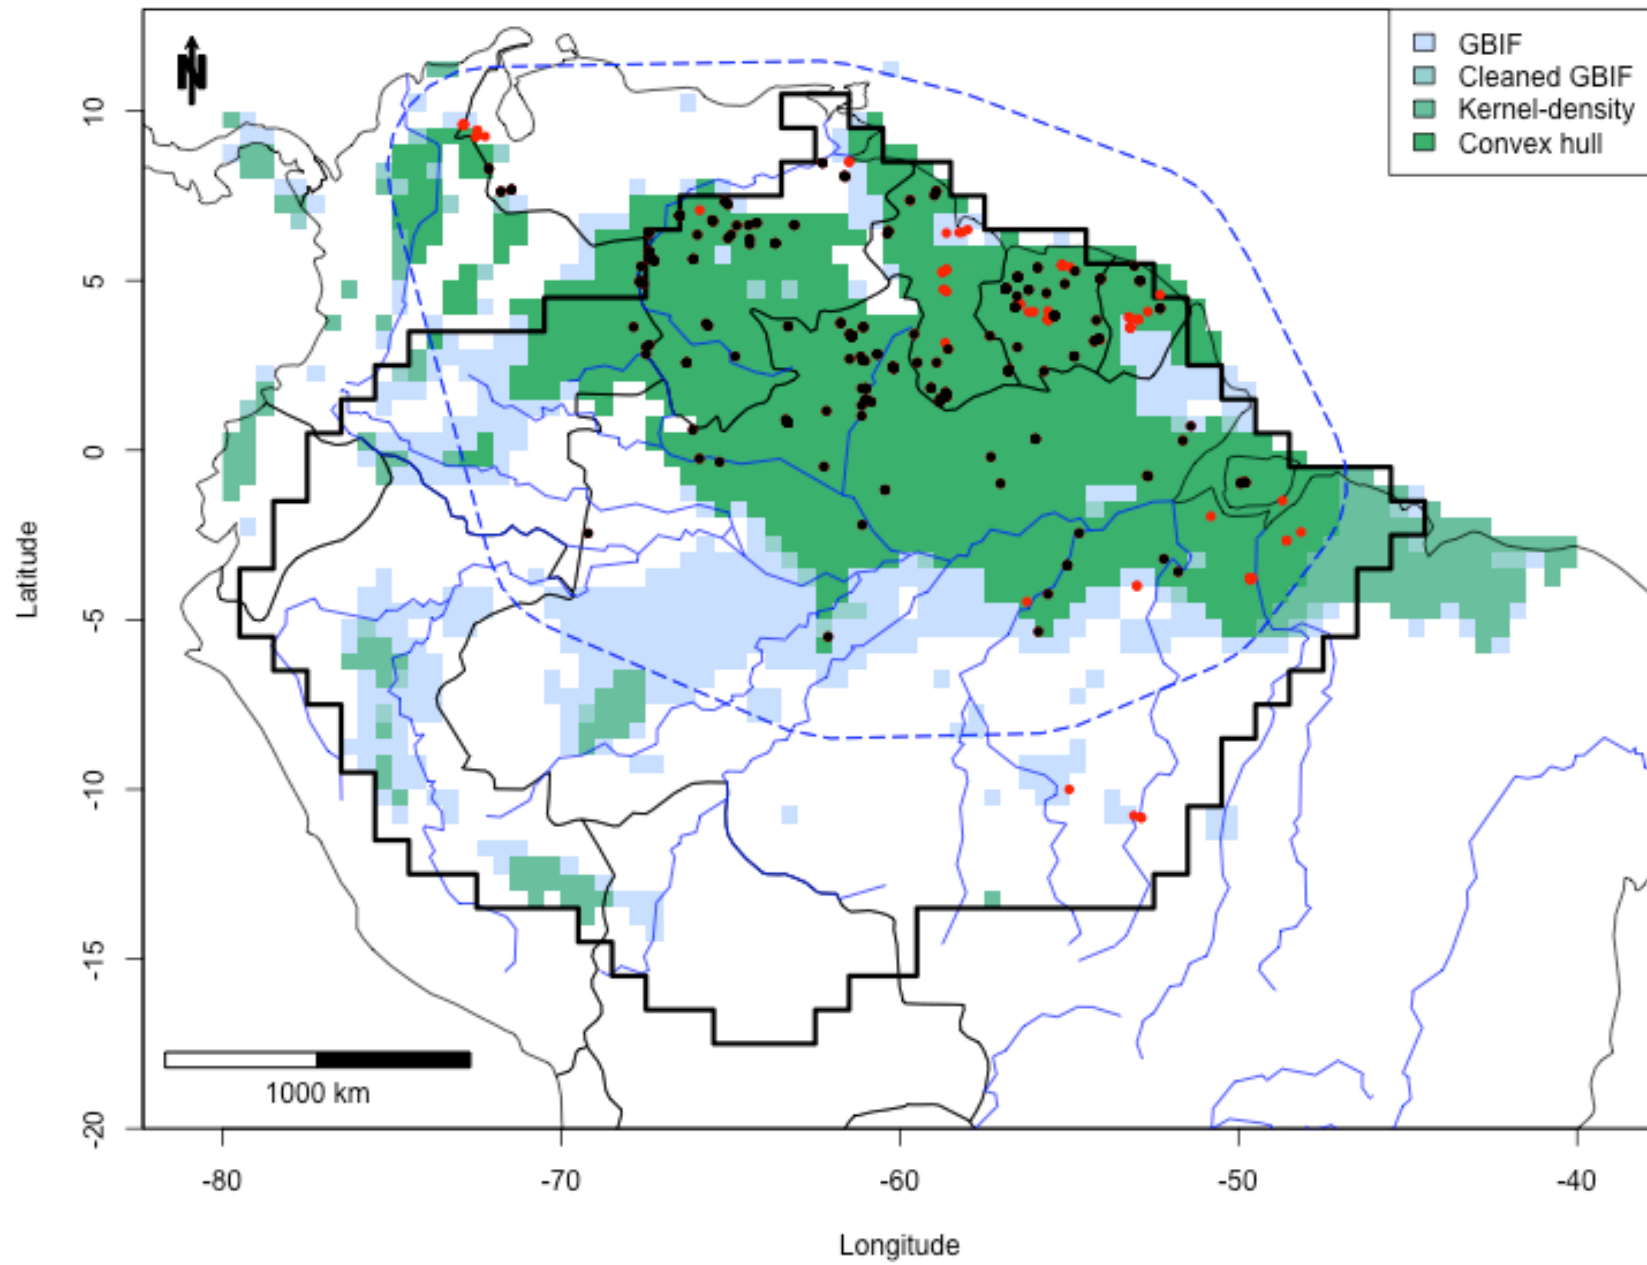

# Lecythis idatimon

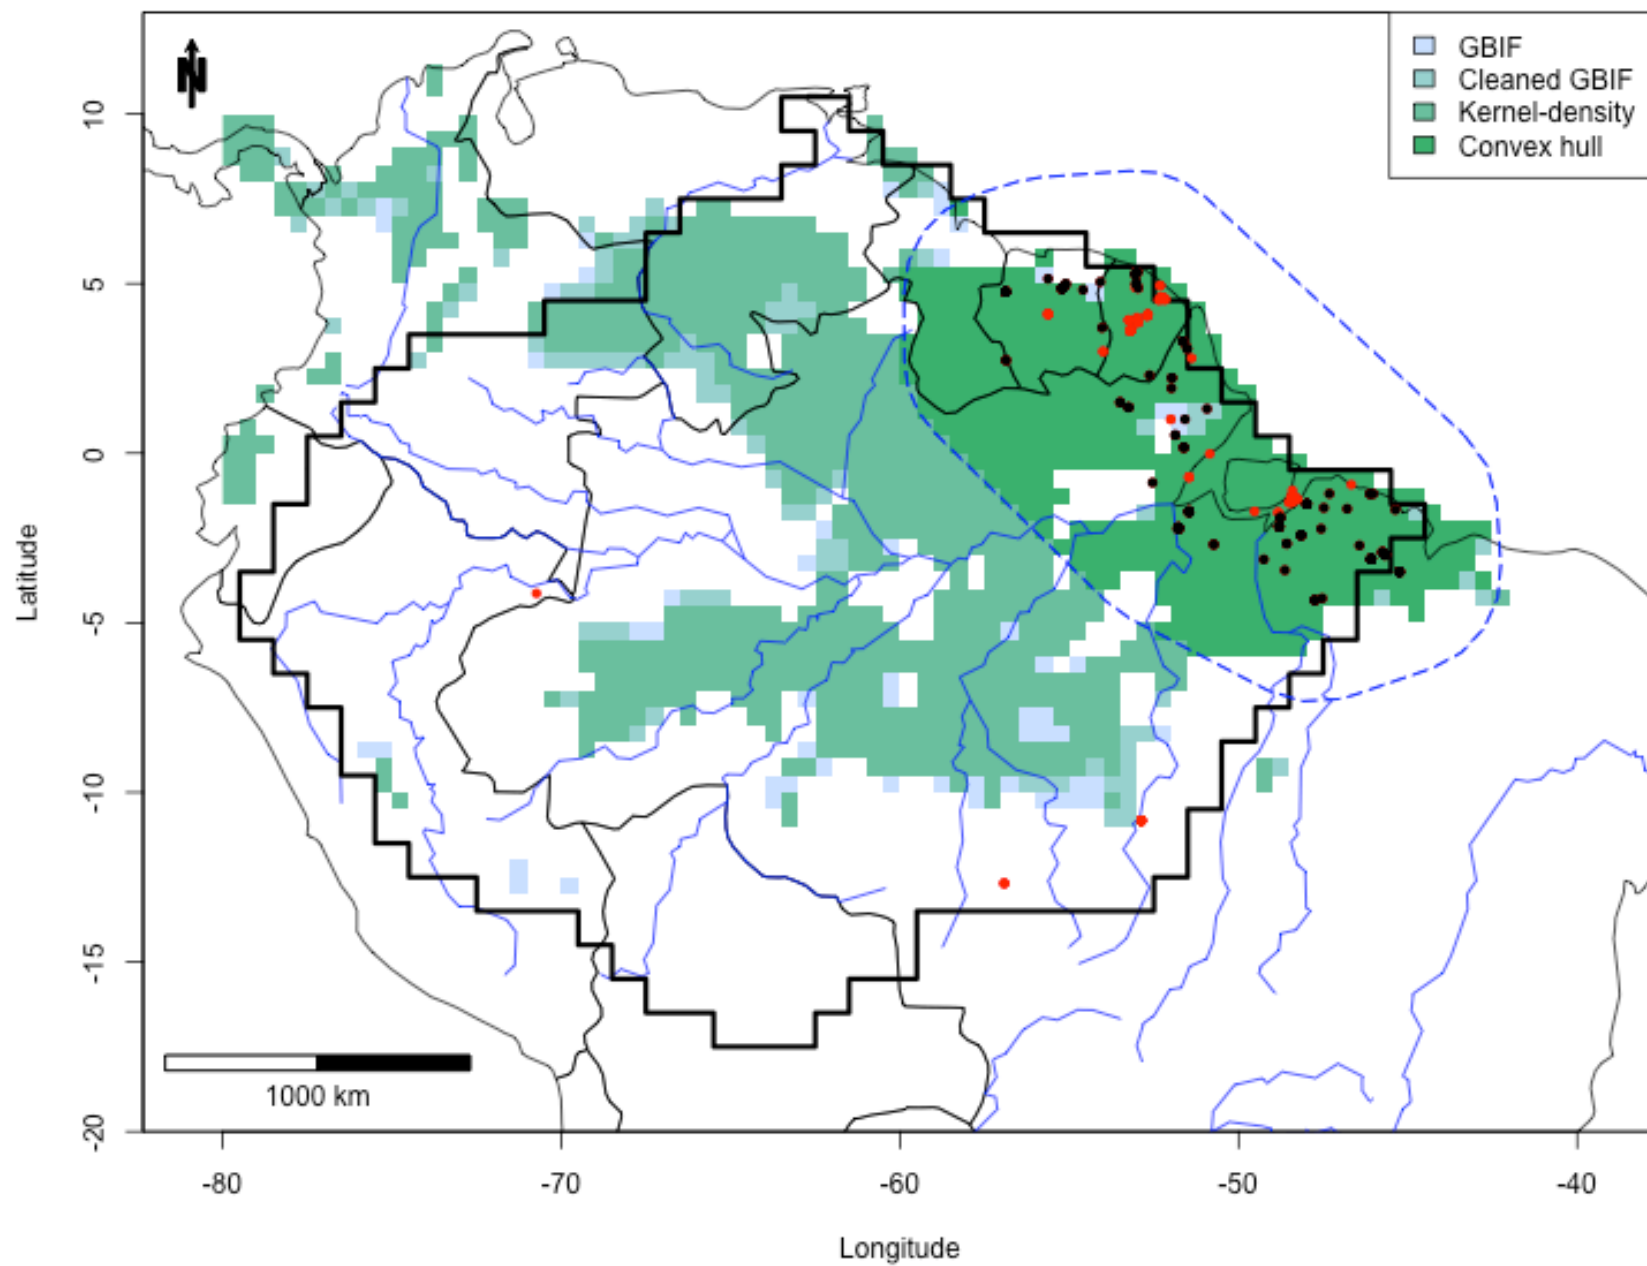

# Leonia crassa

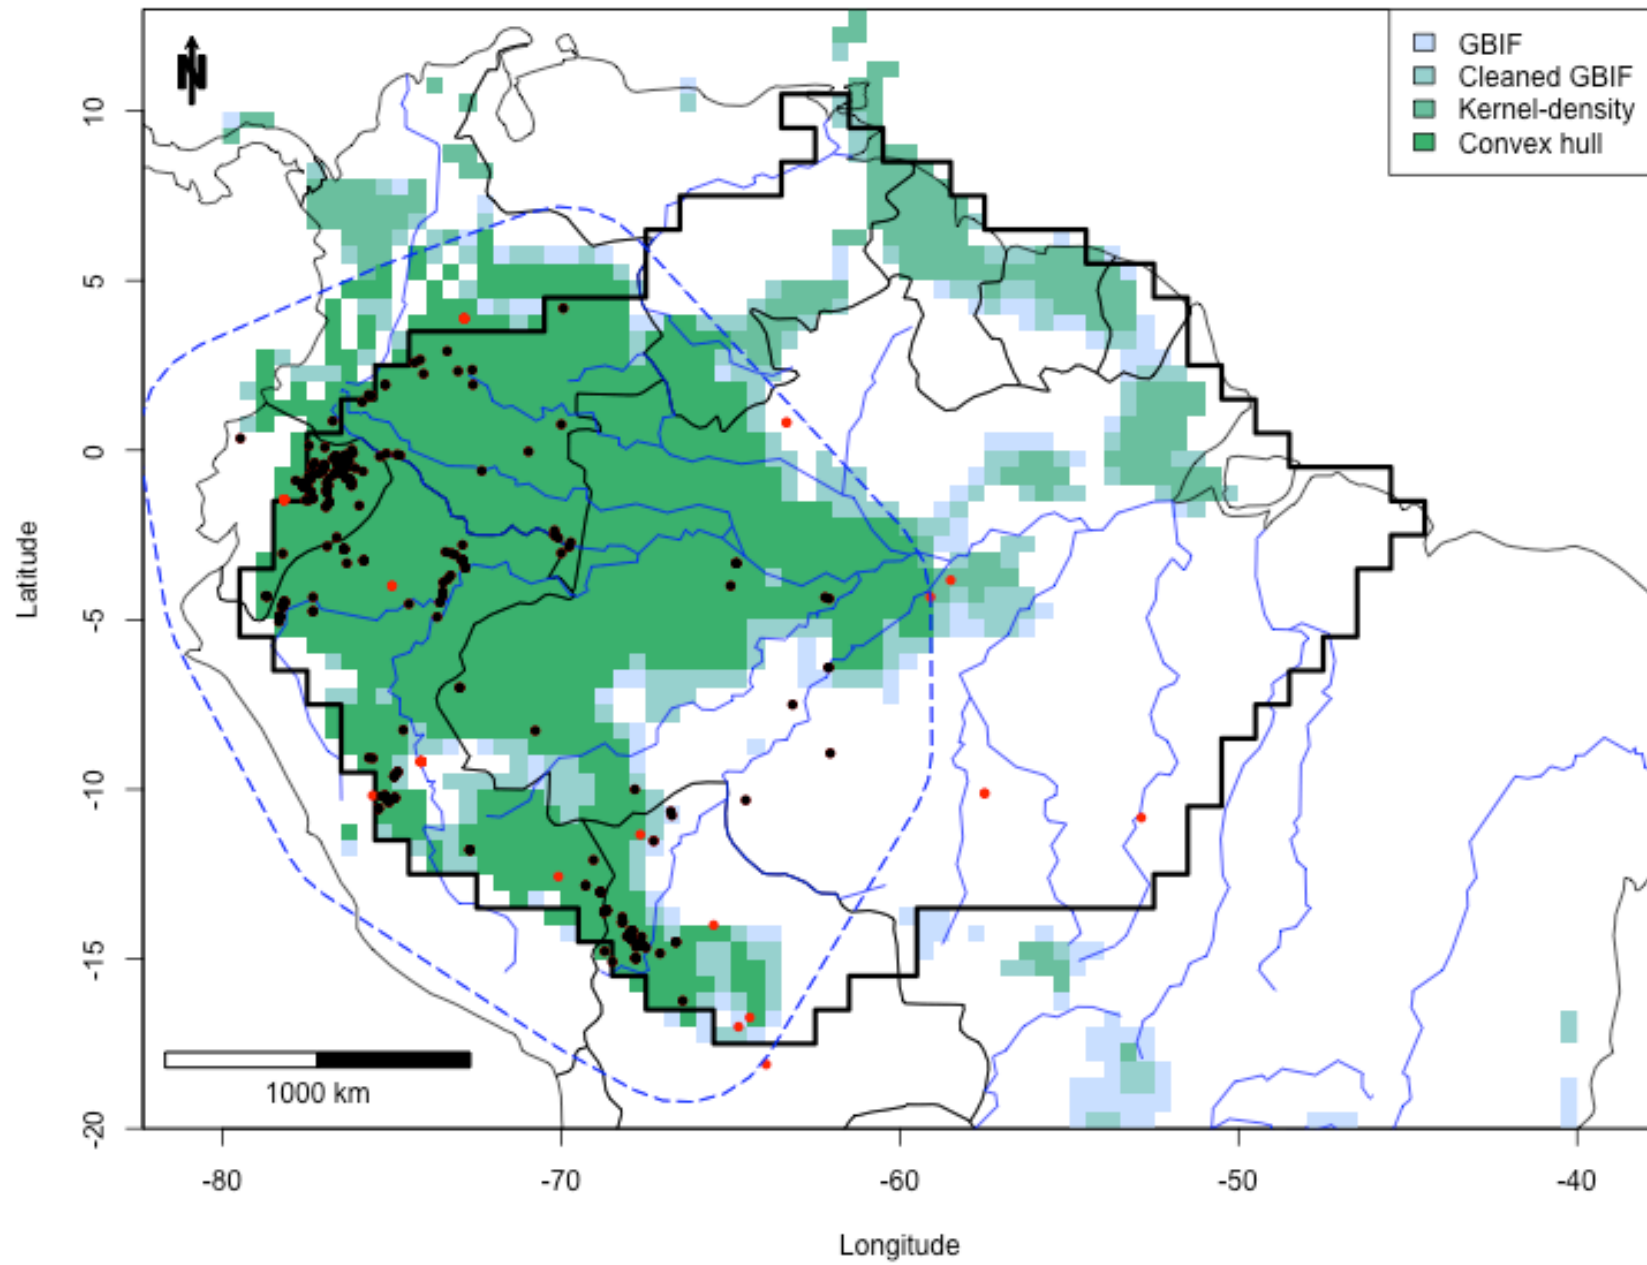

# Leonia glycyarpa

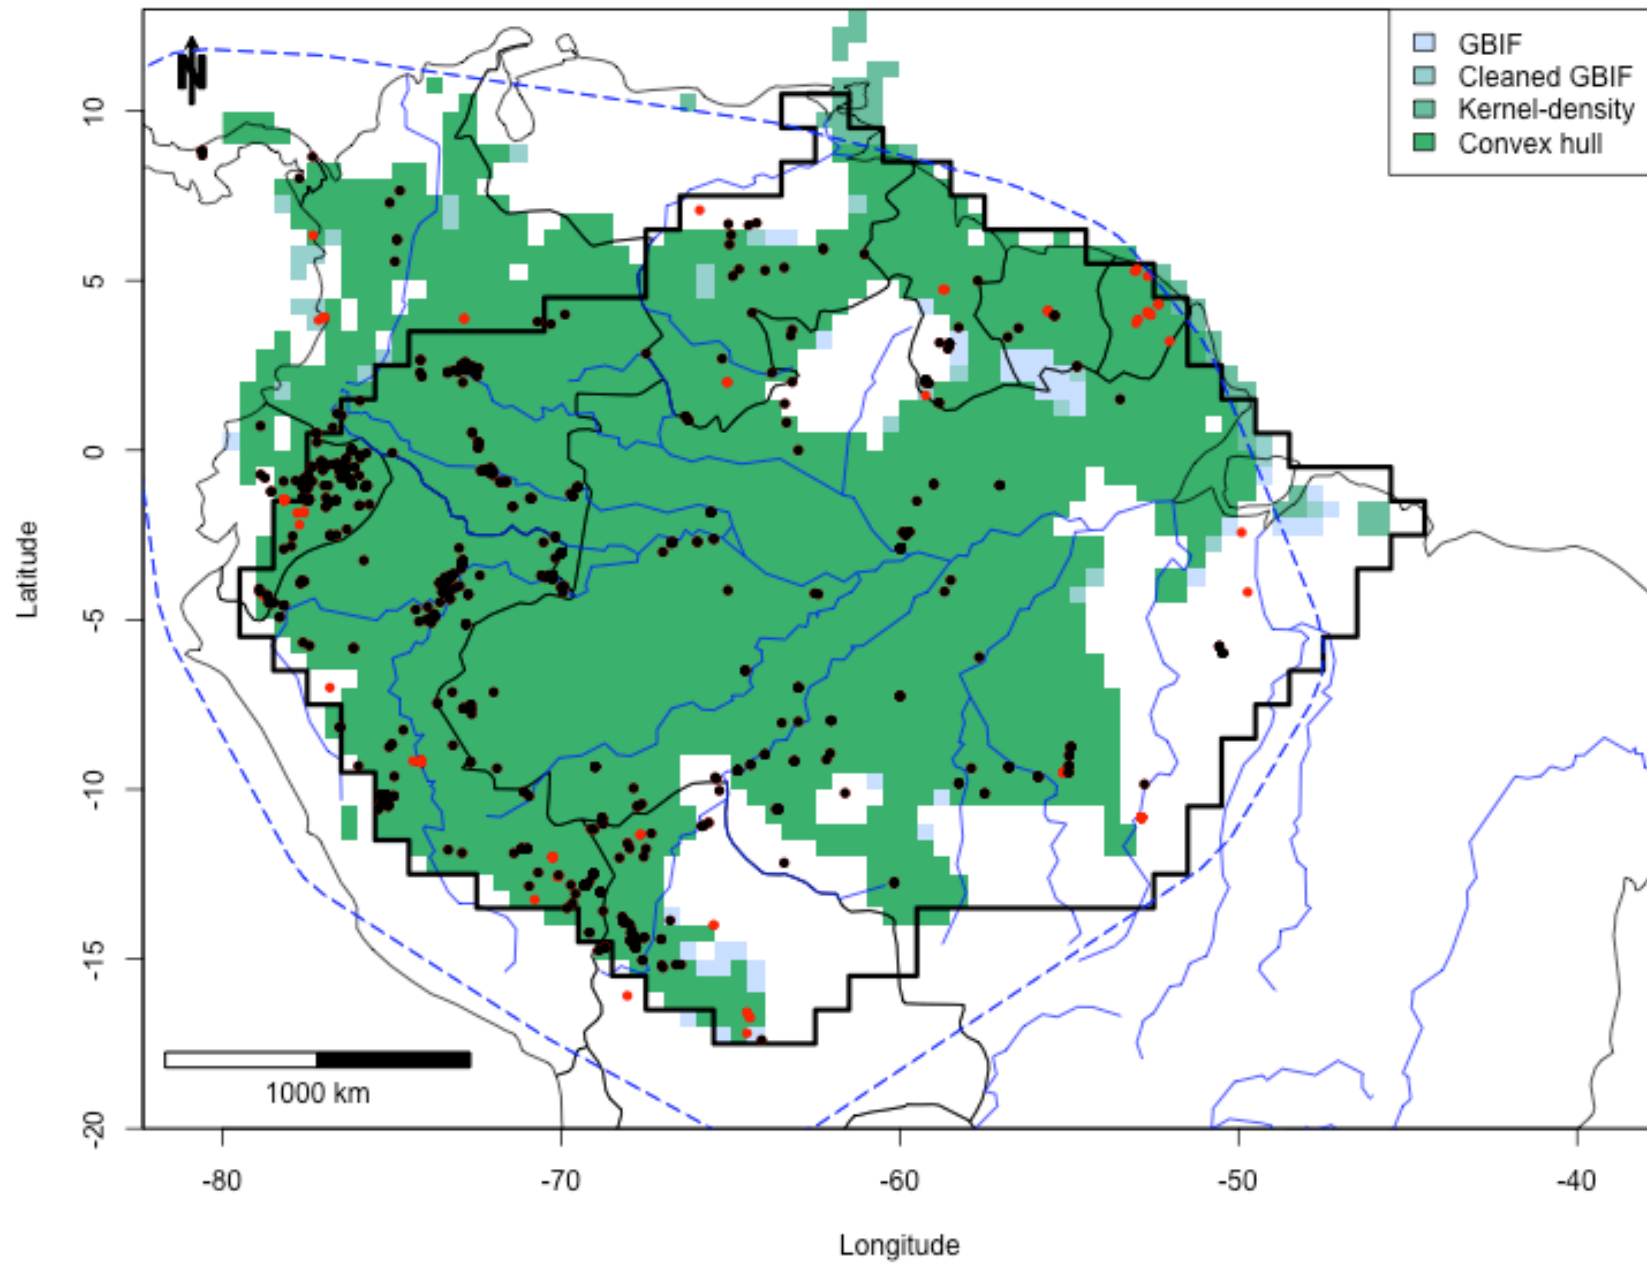

# Licania alba

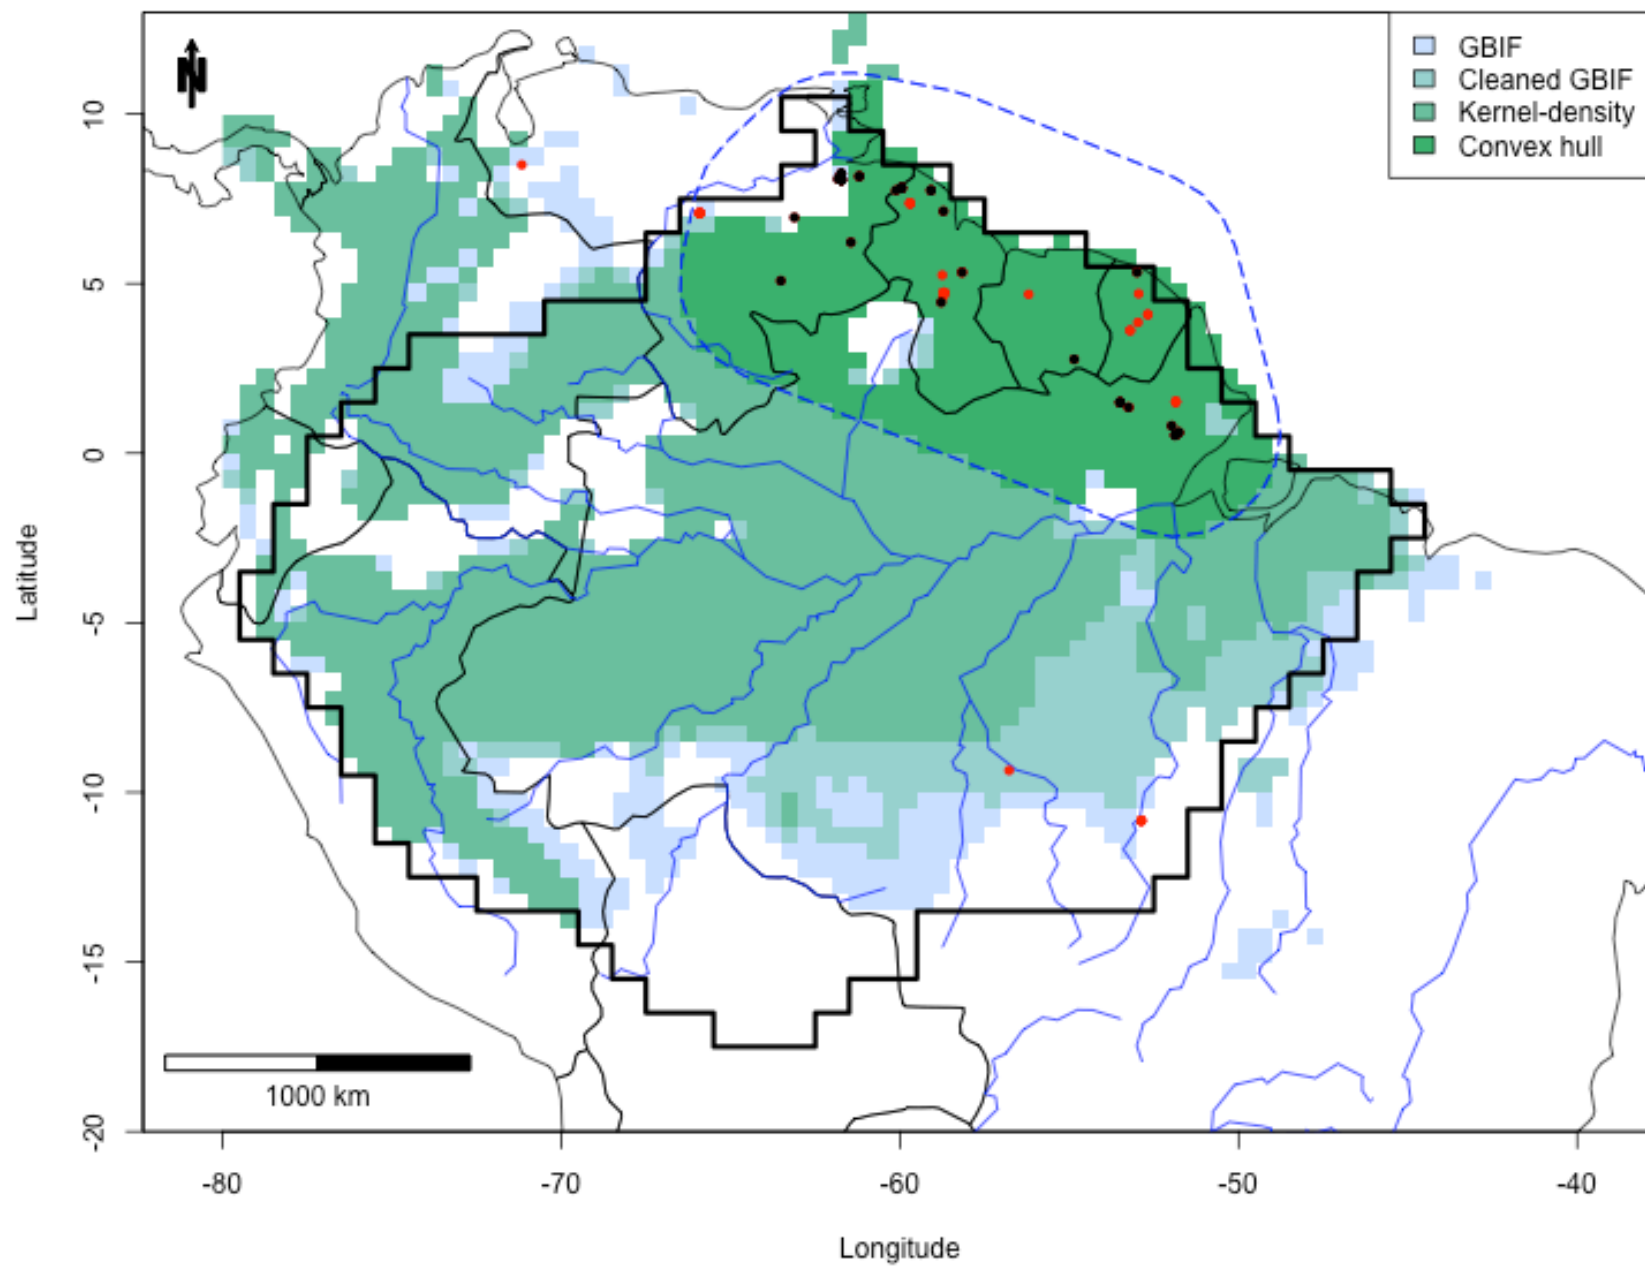

# Licania apetala

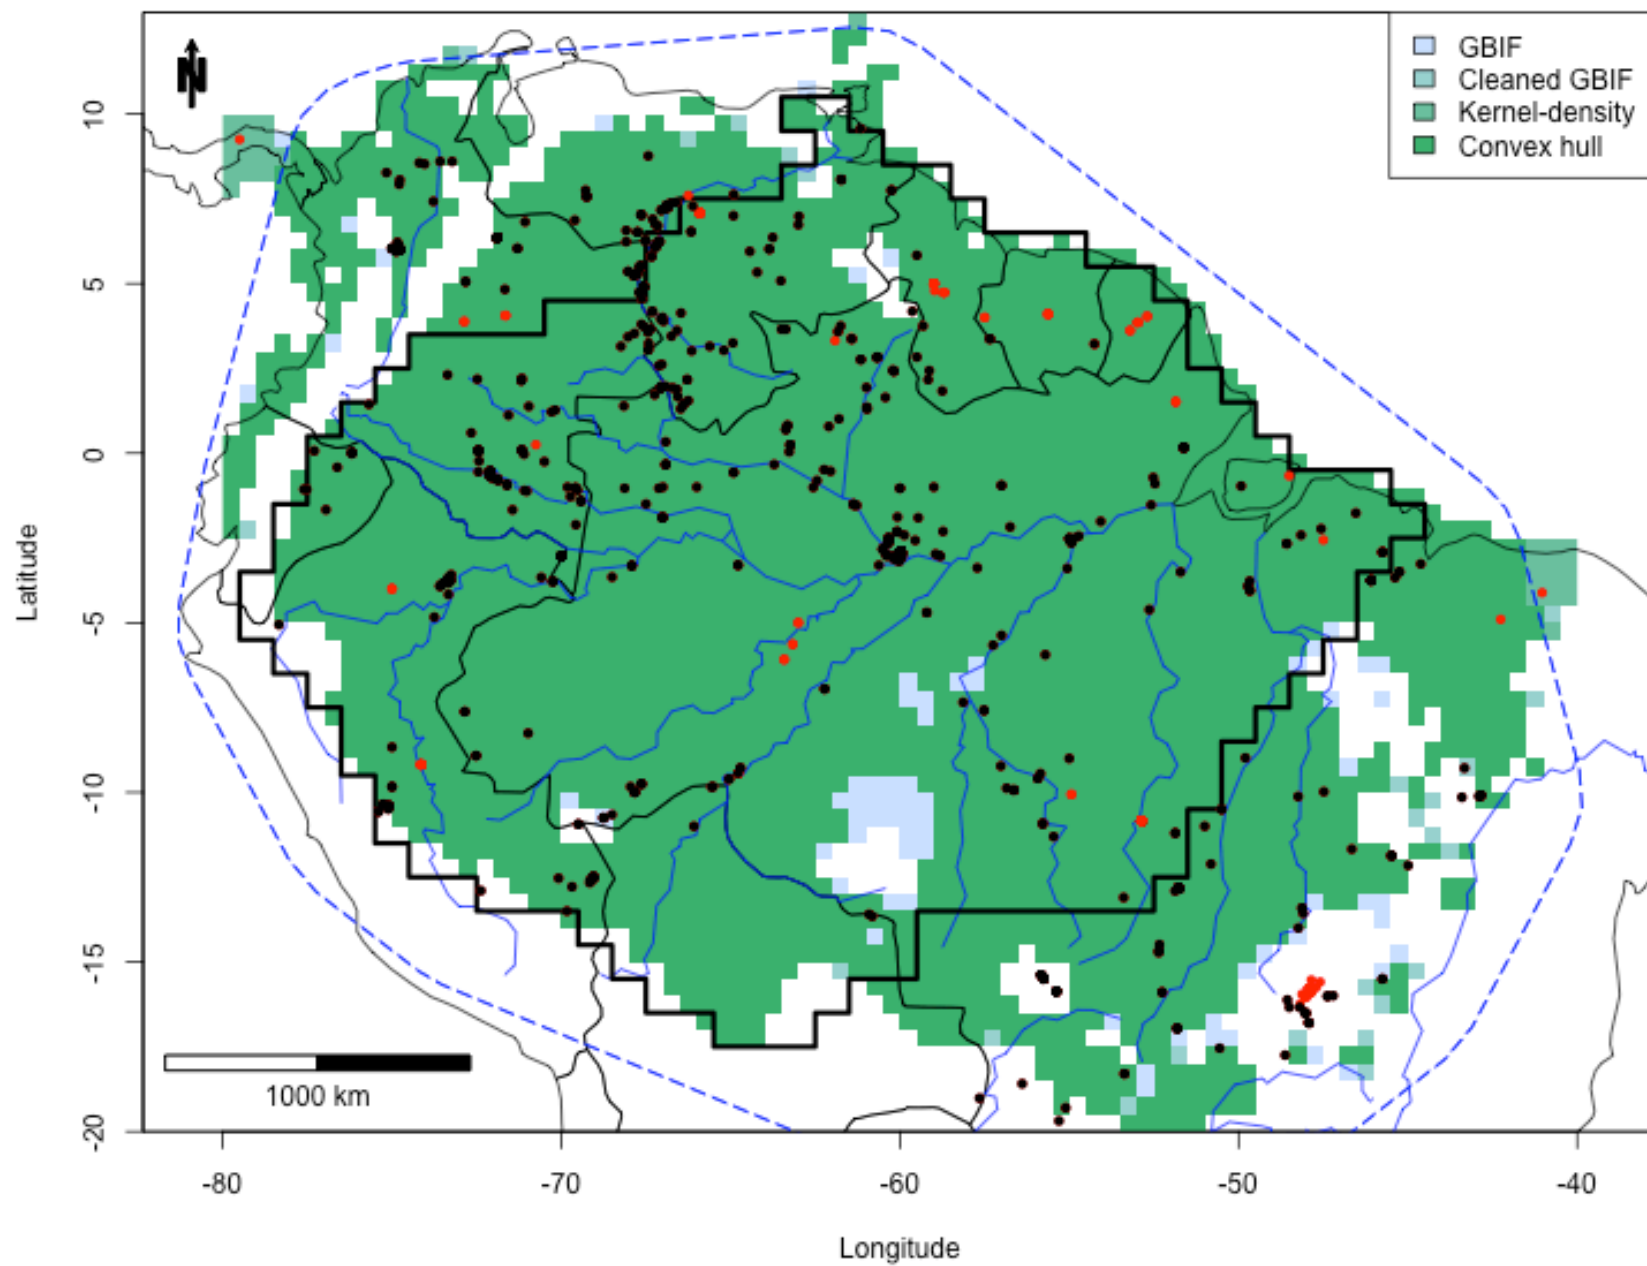

# Licania buxifolia

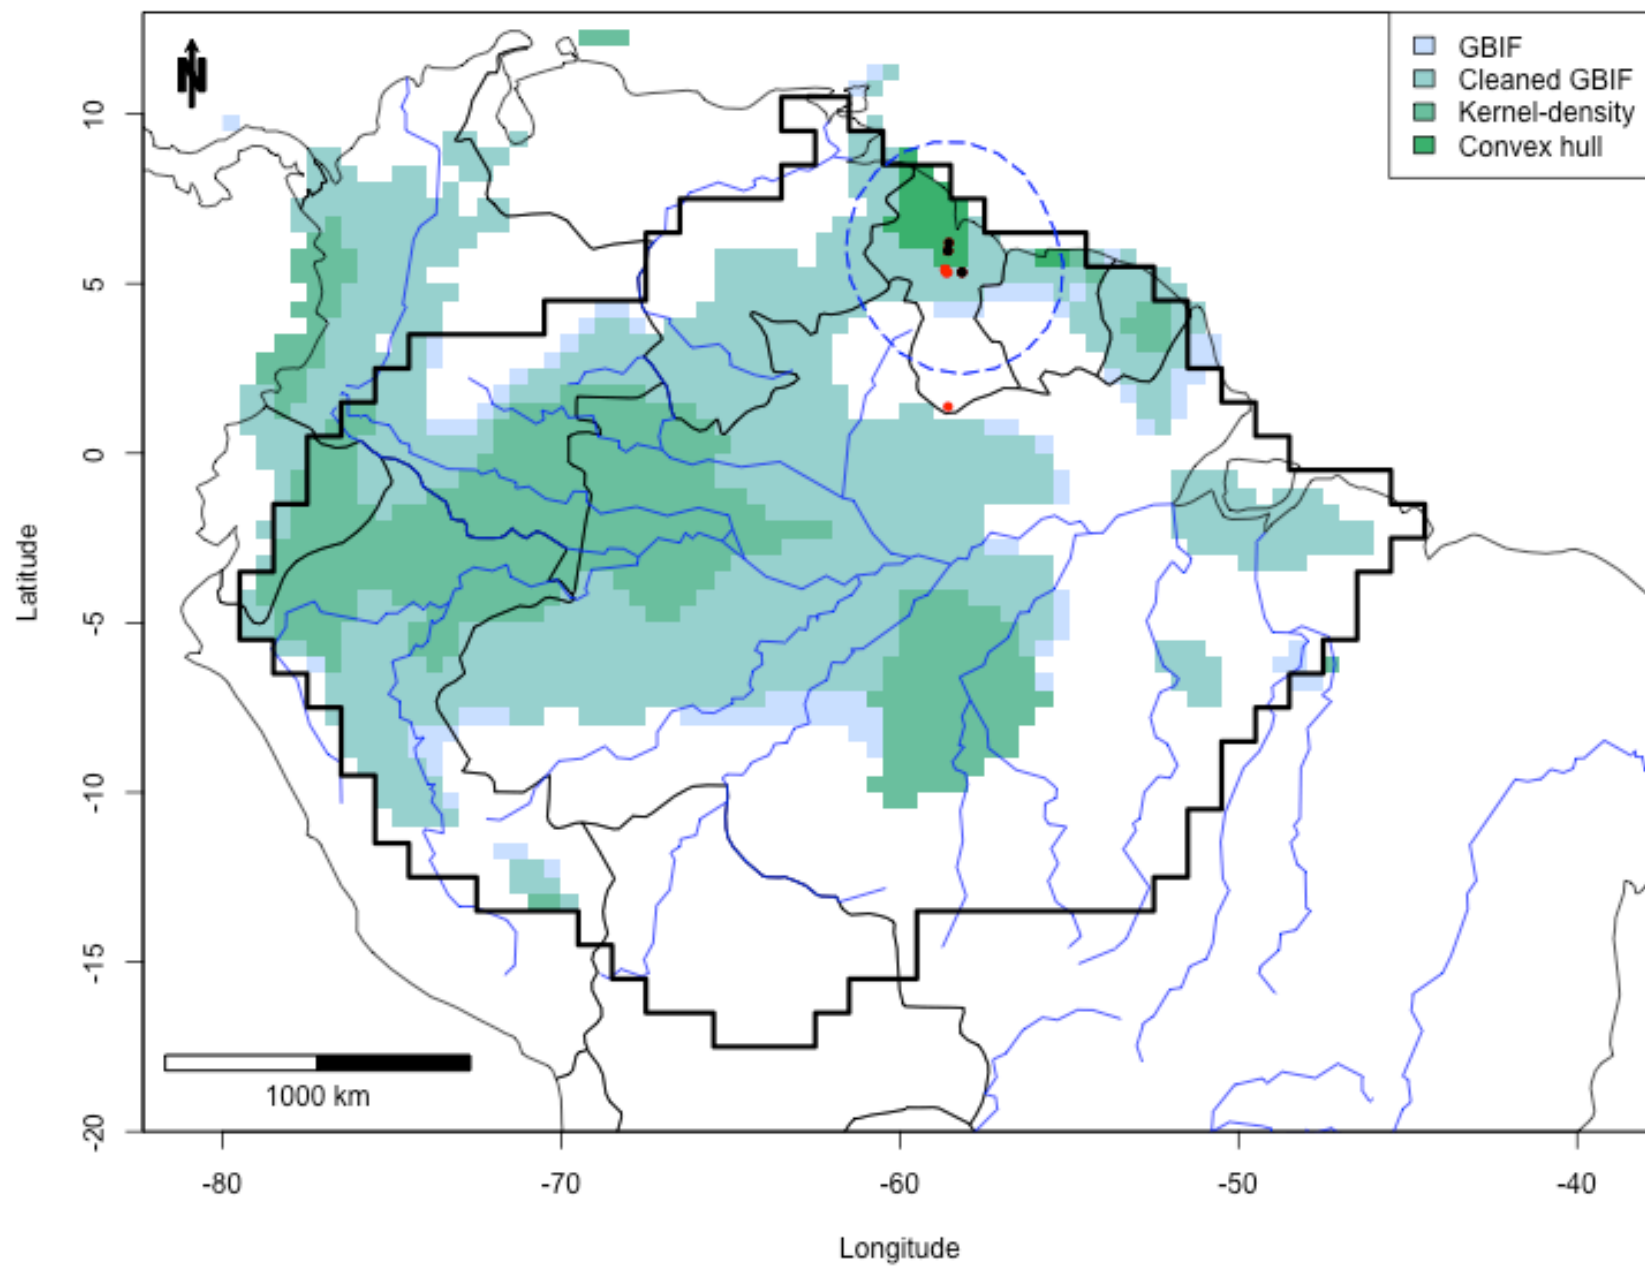

# Licania densiflora

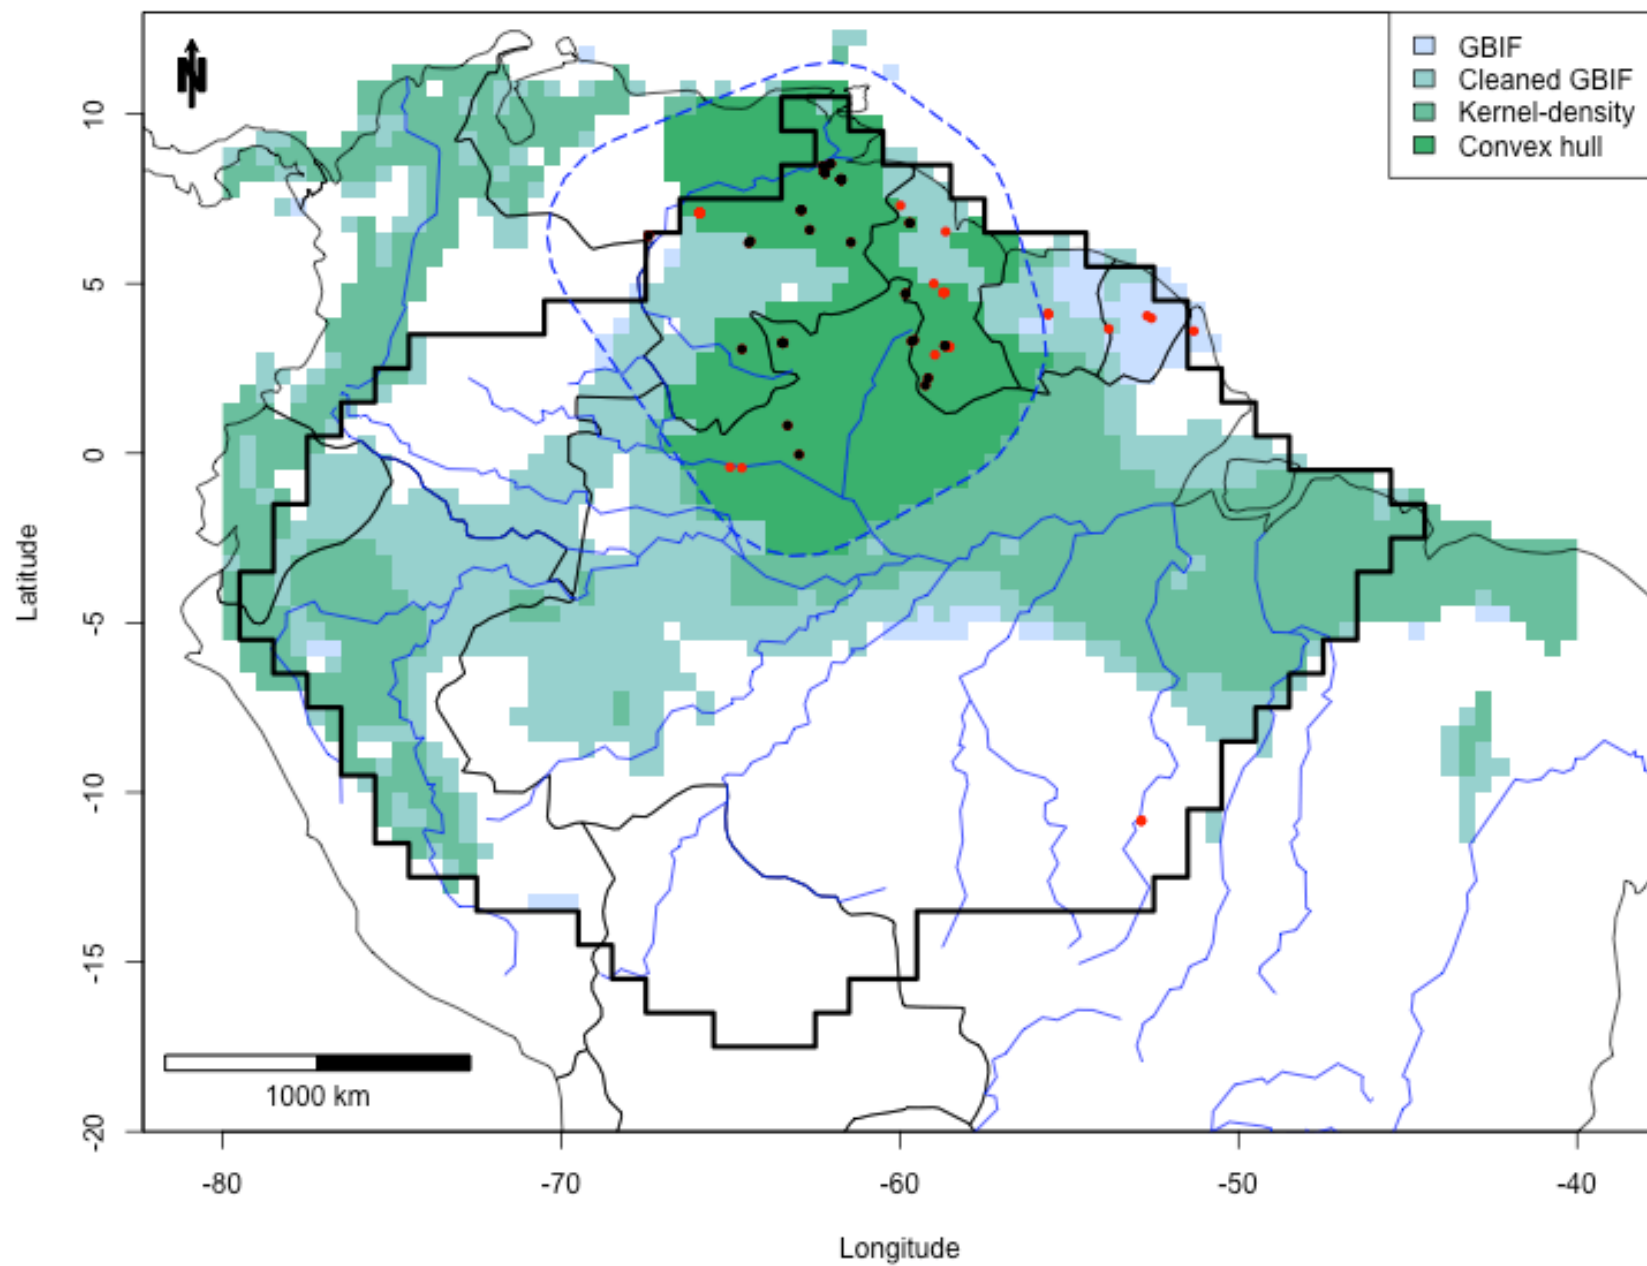



# Licania heteromorpha

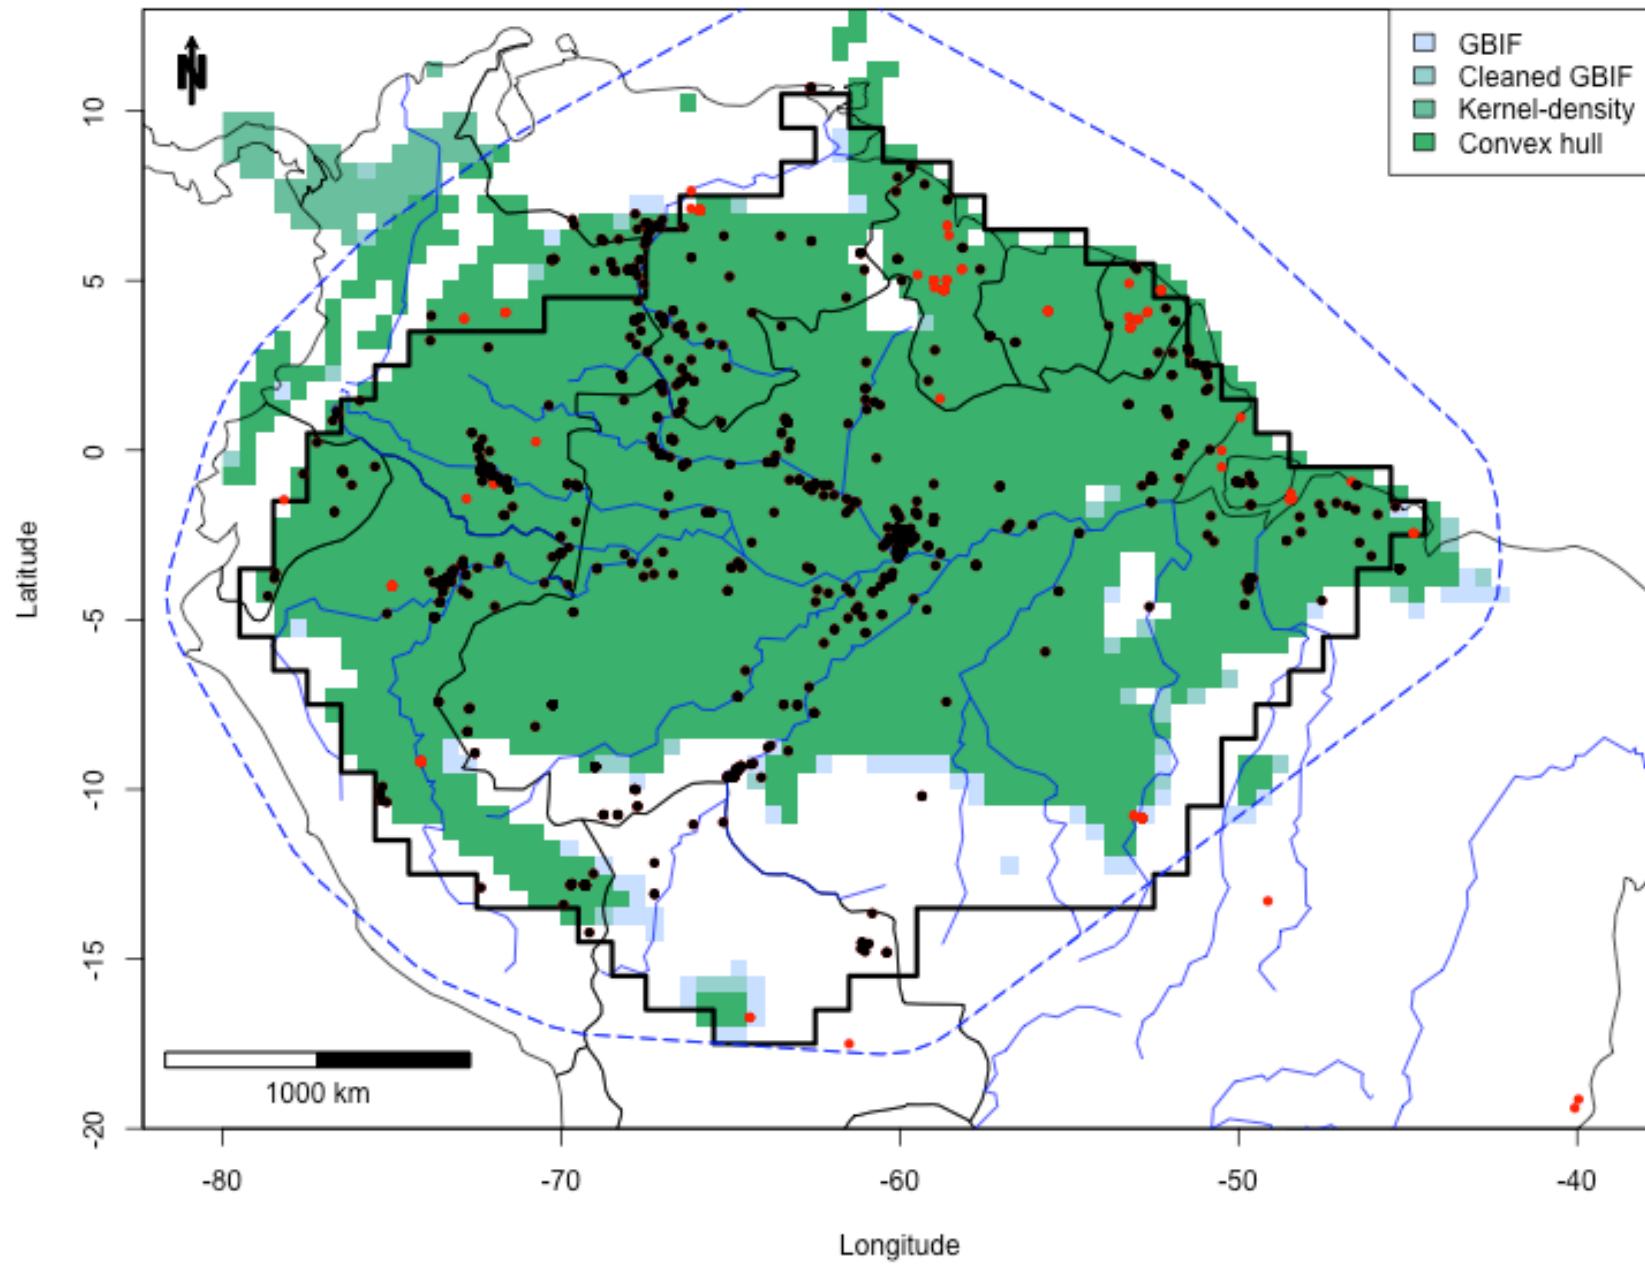

# Licania kunthiana

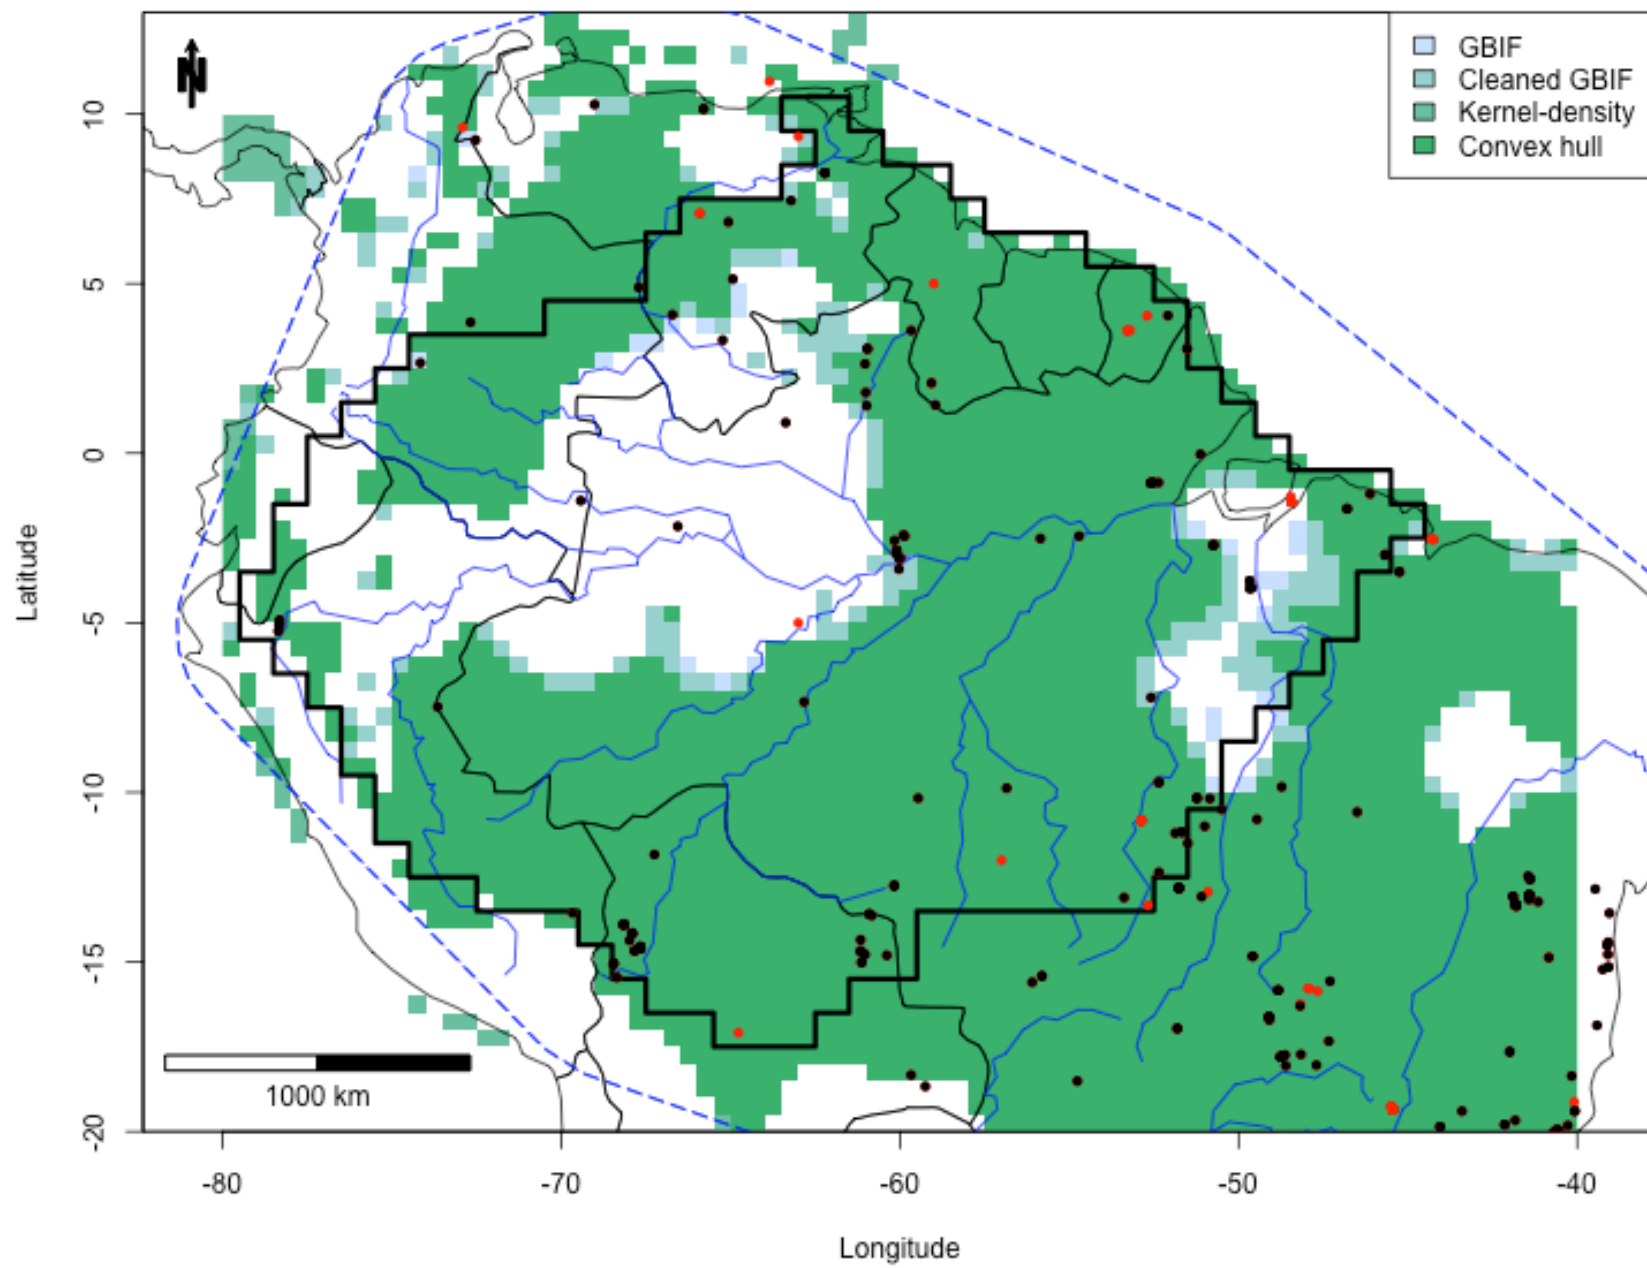

# Licania micrantha

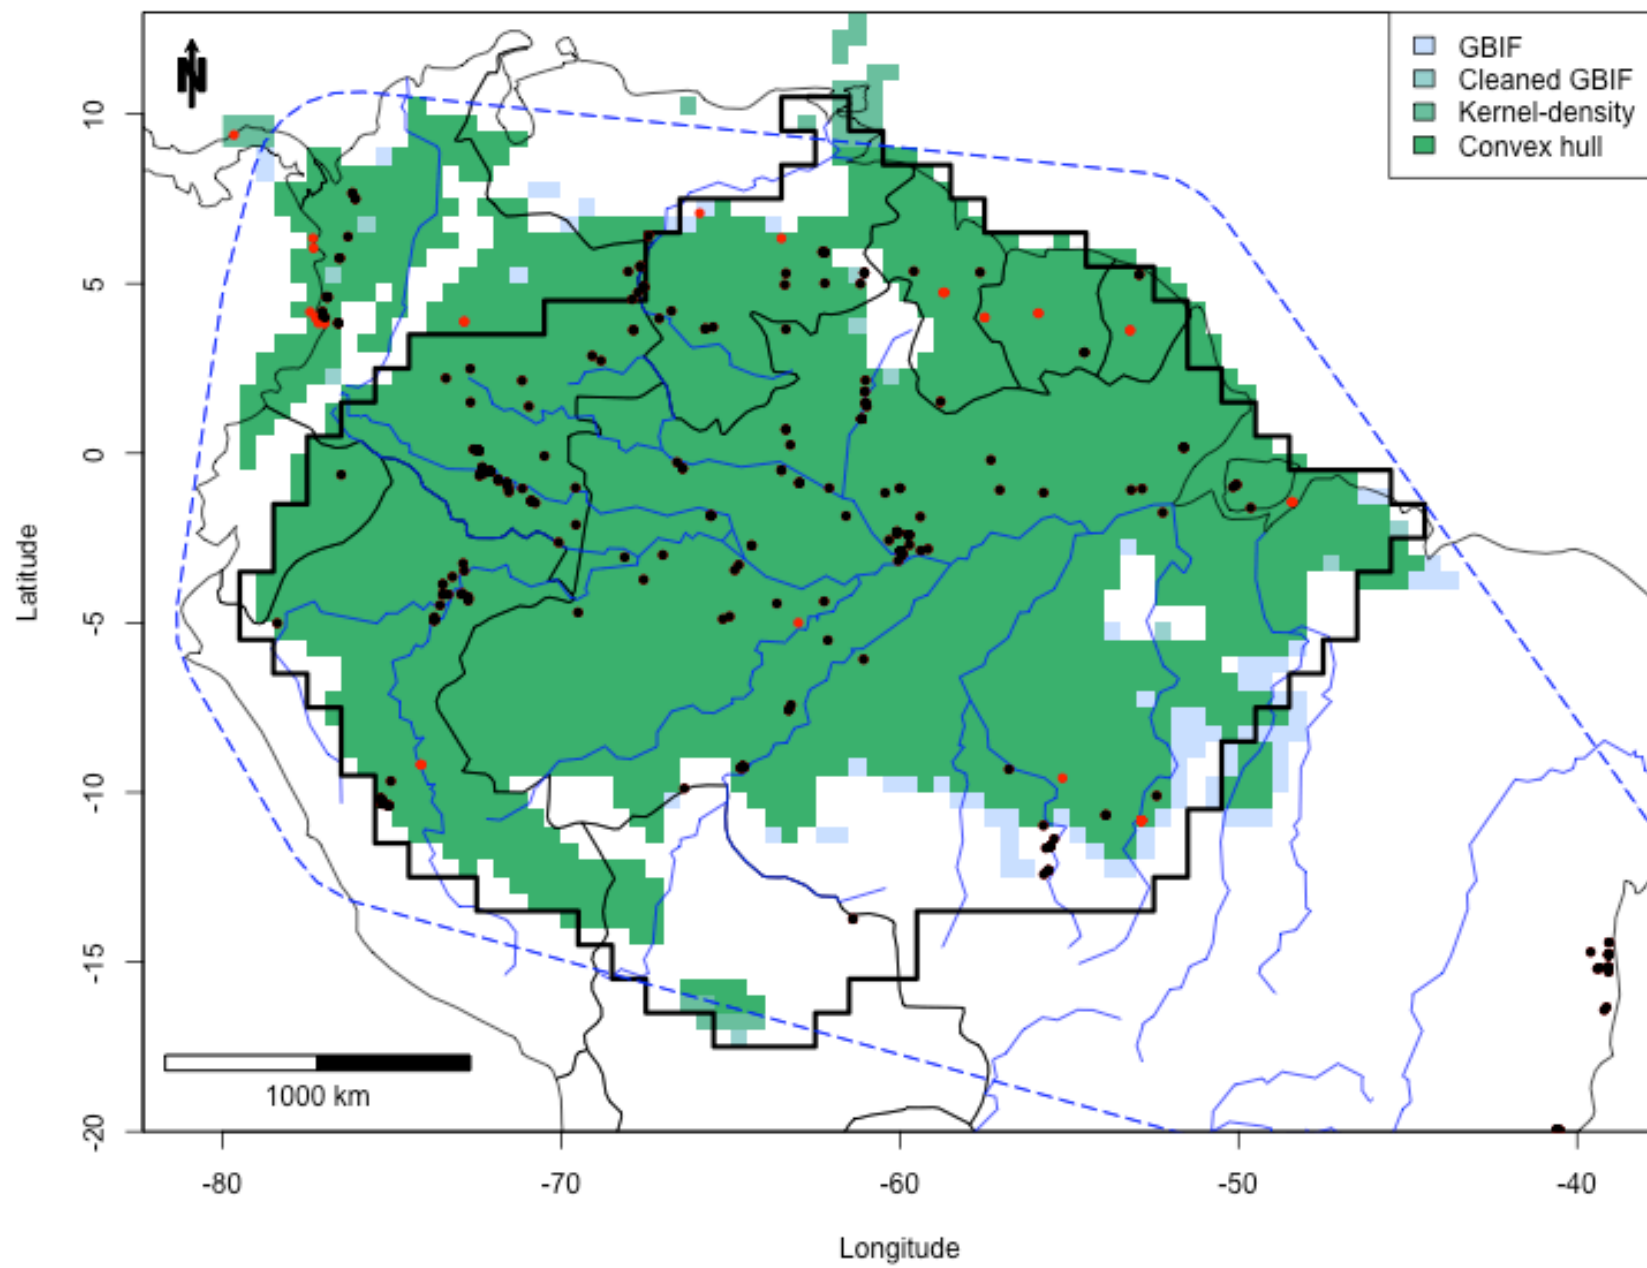

# Licania oblongifolia

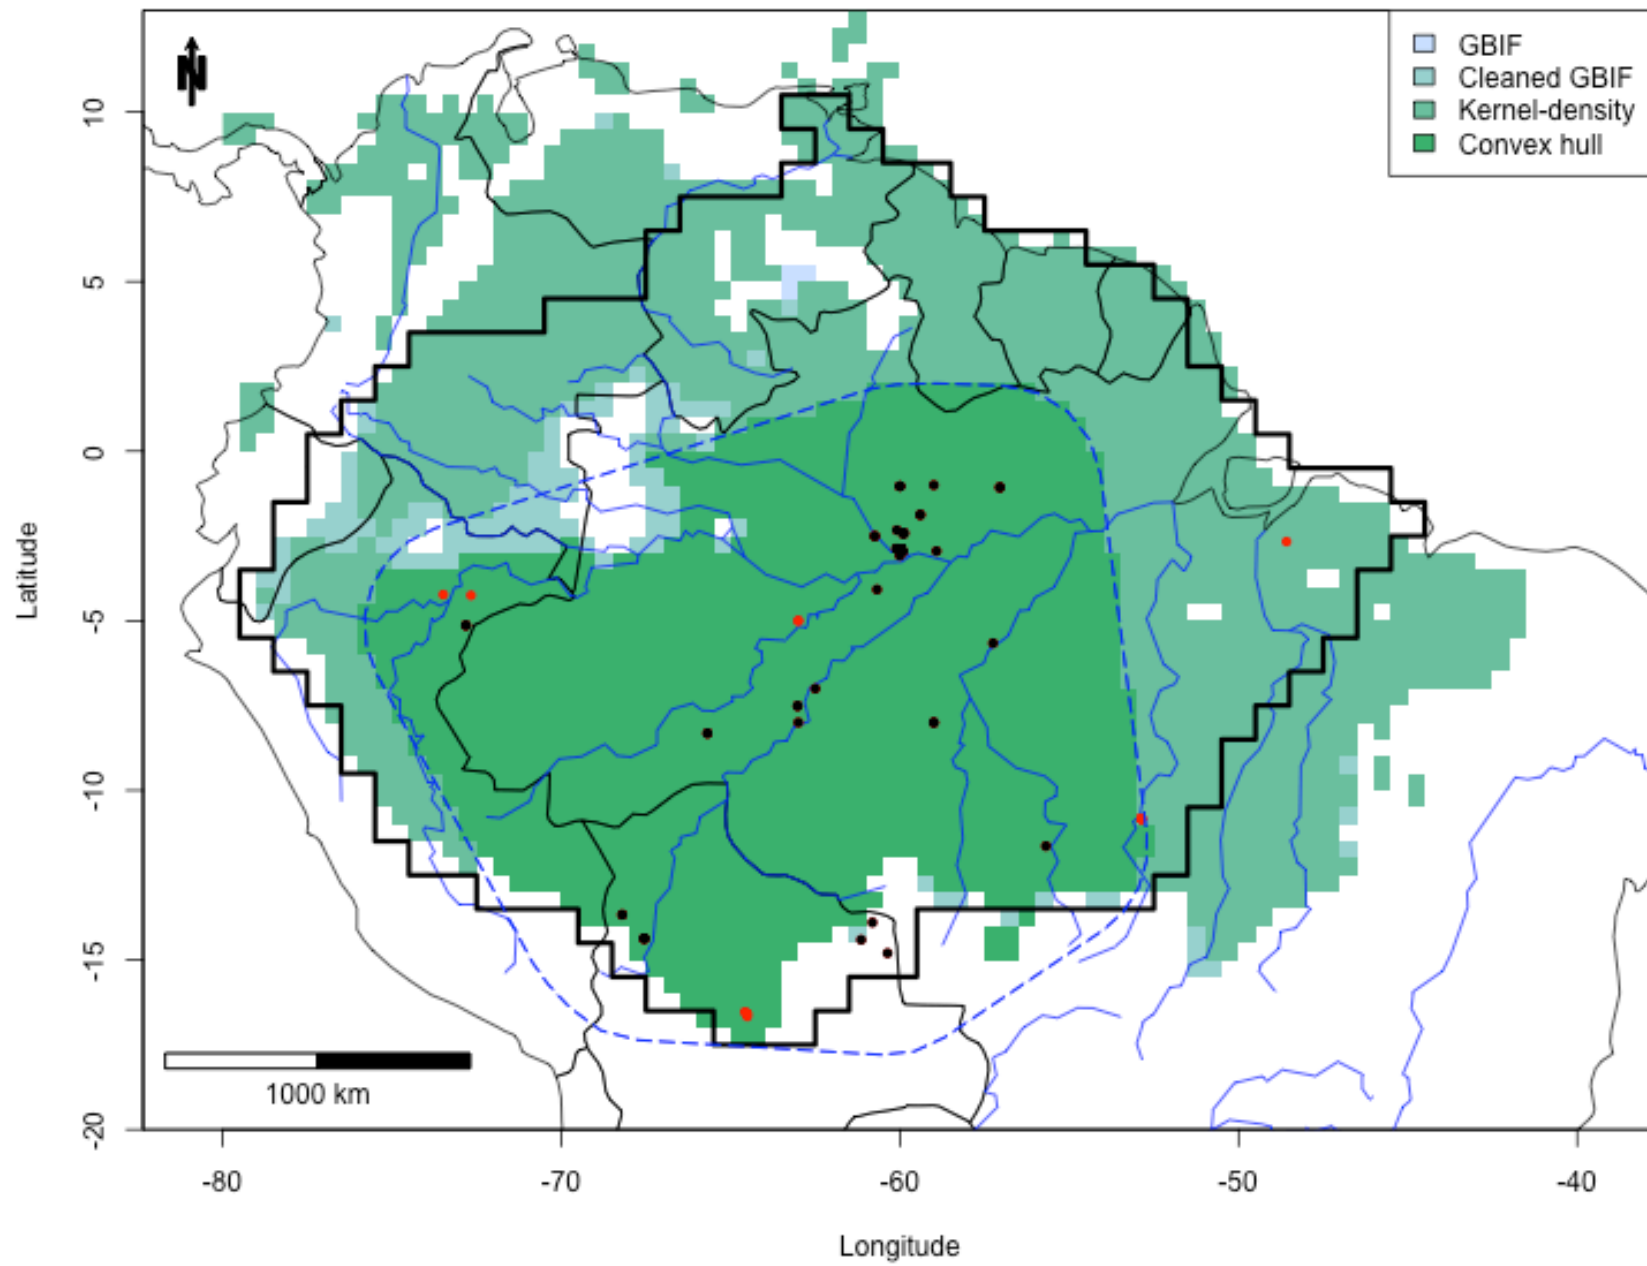

# Licania octandra

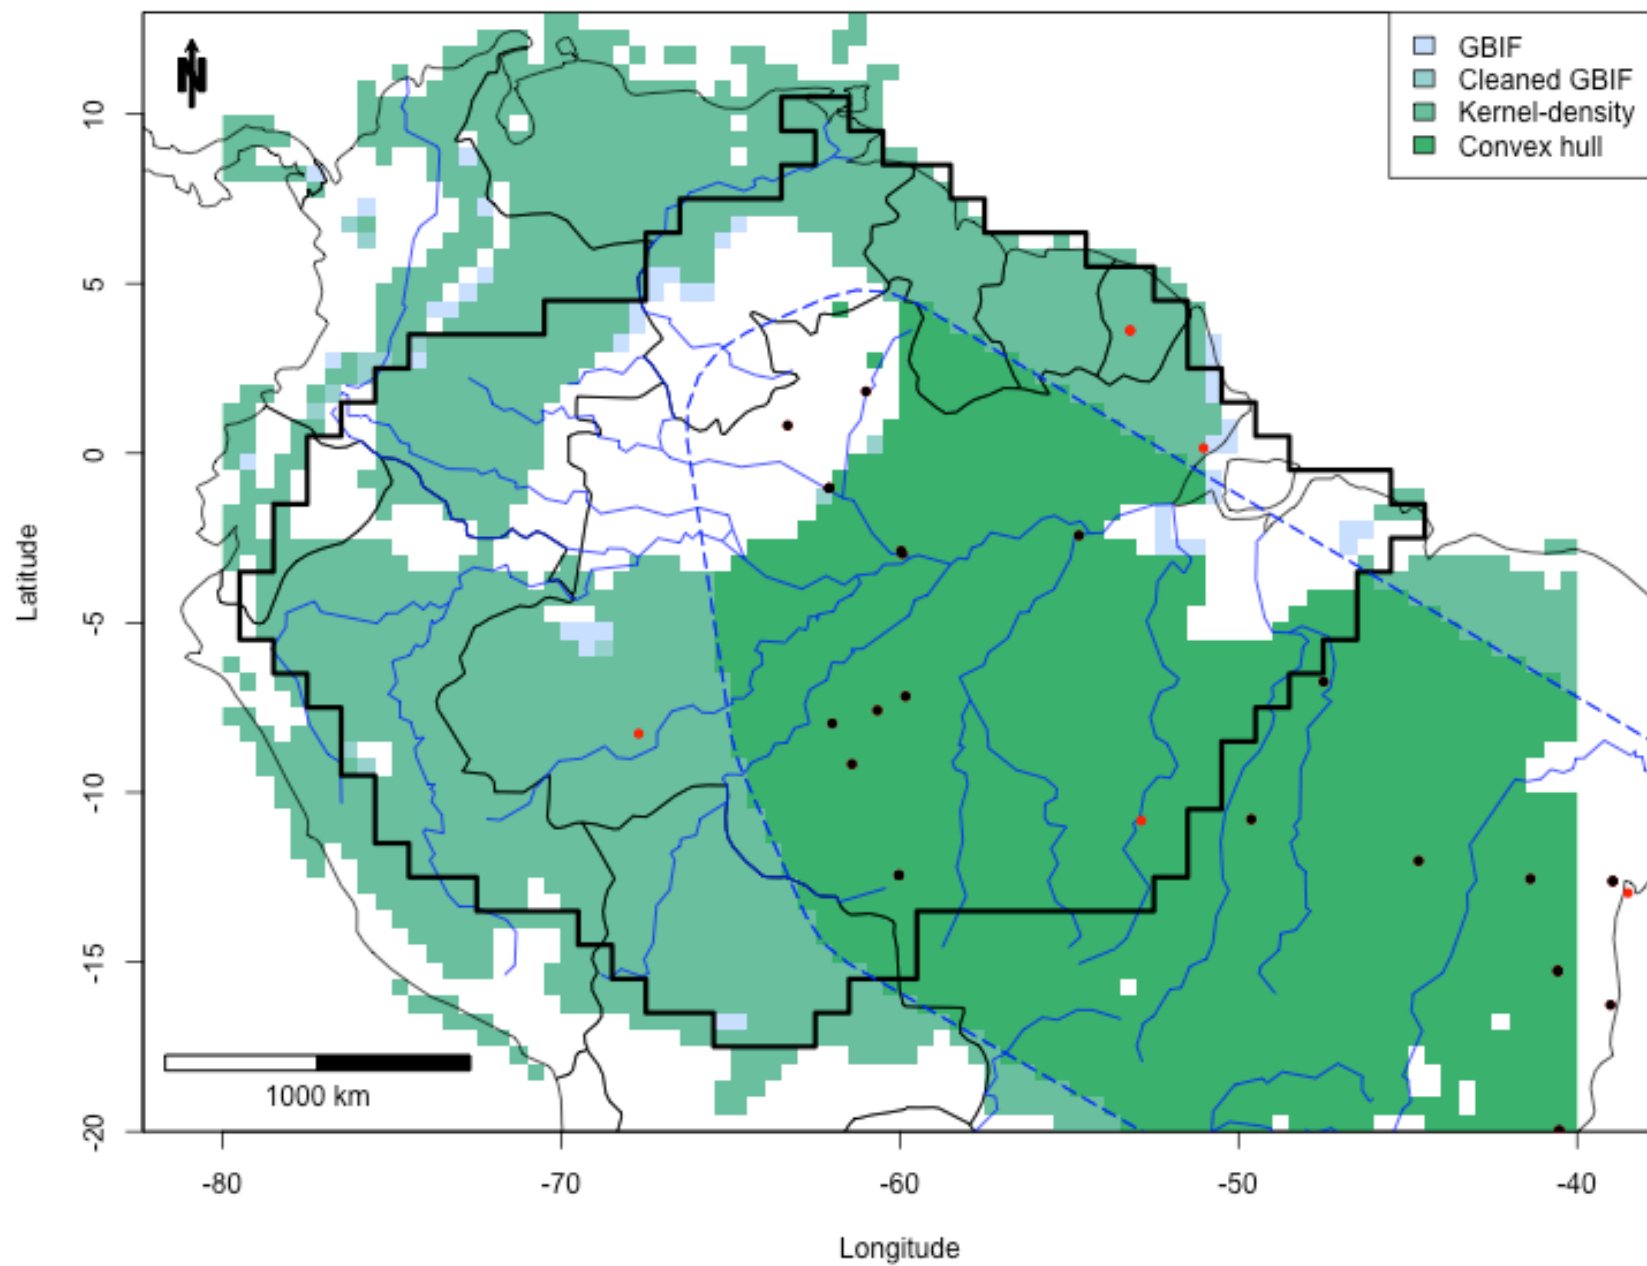

# Luehea cymulosa

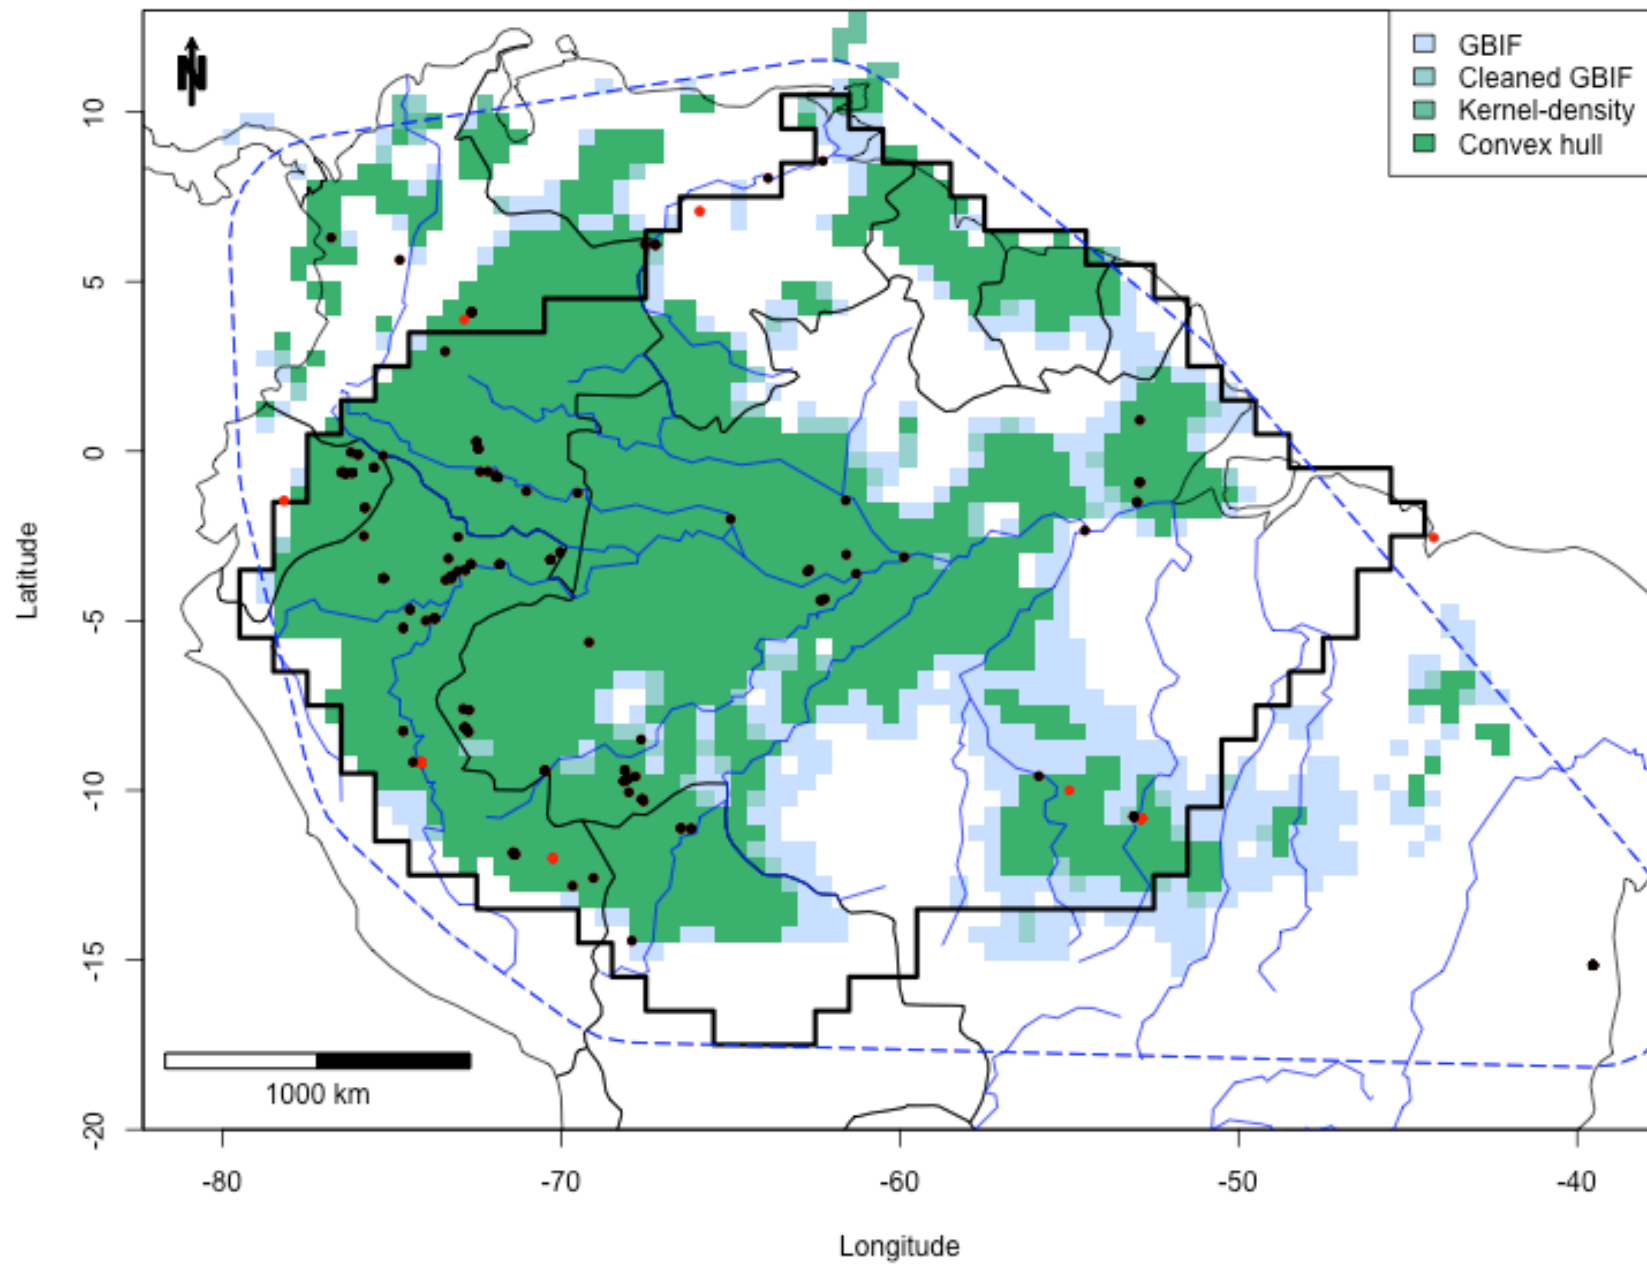

# Mabea nitida

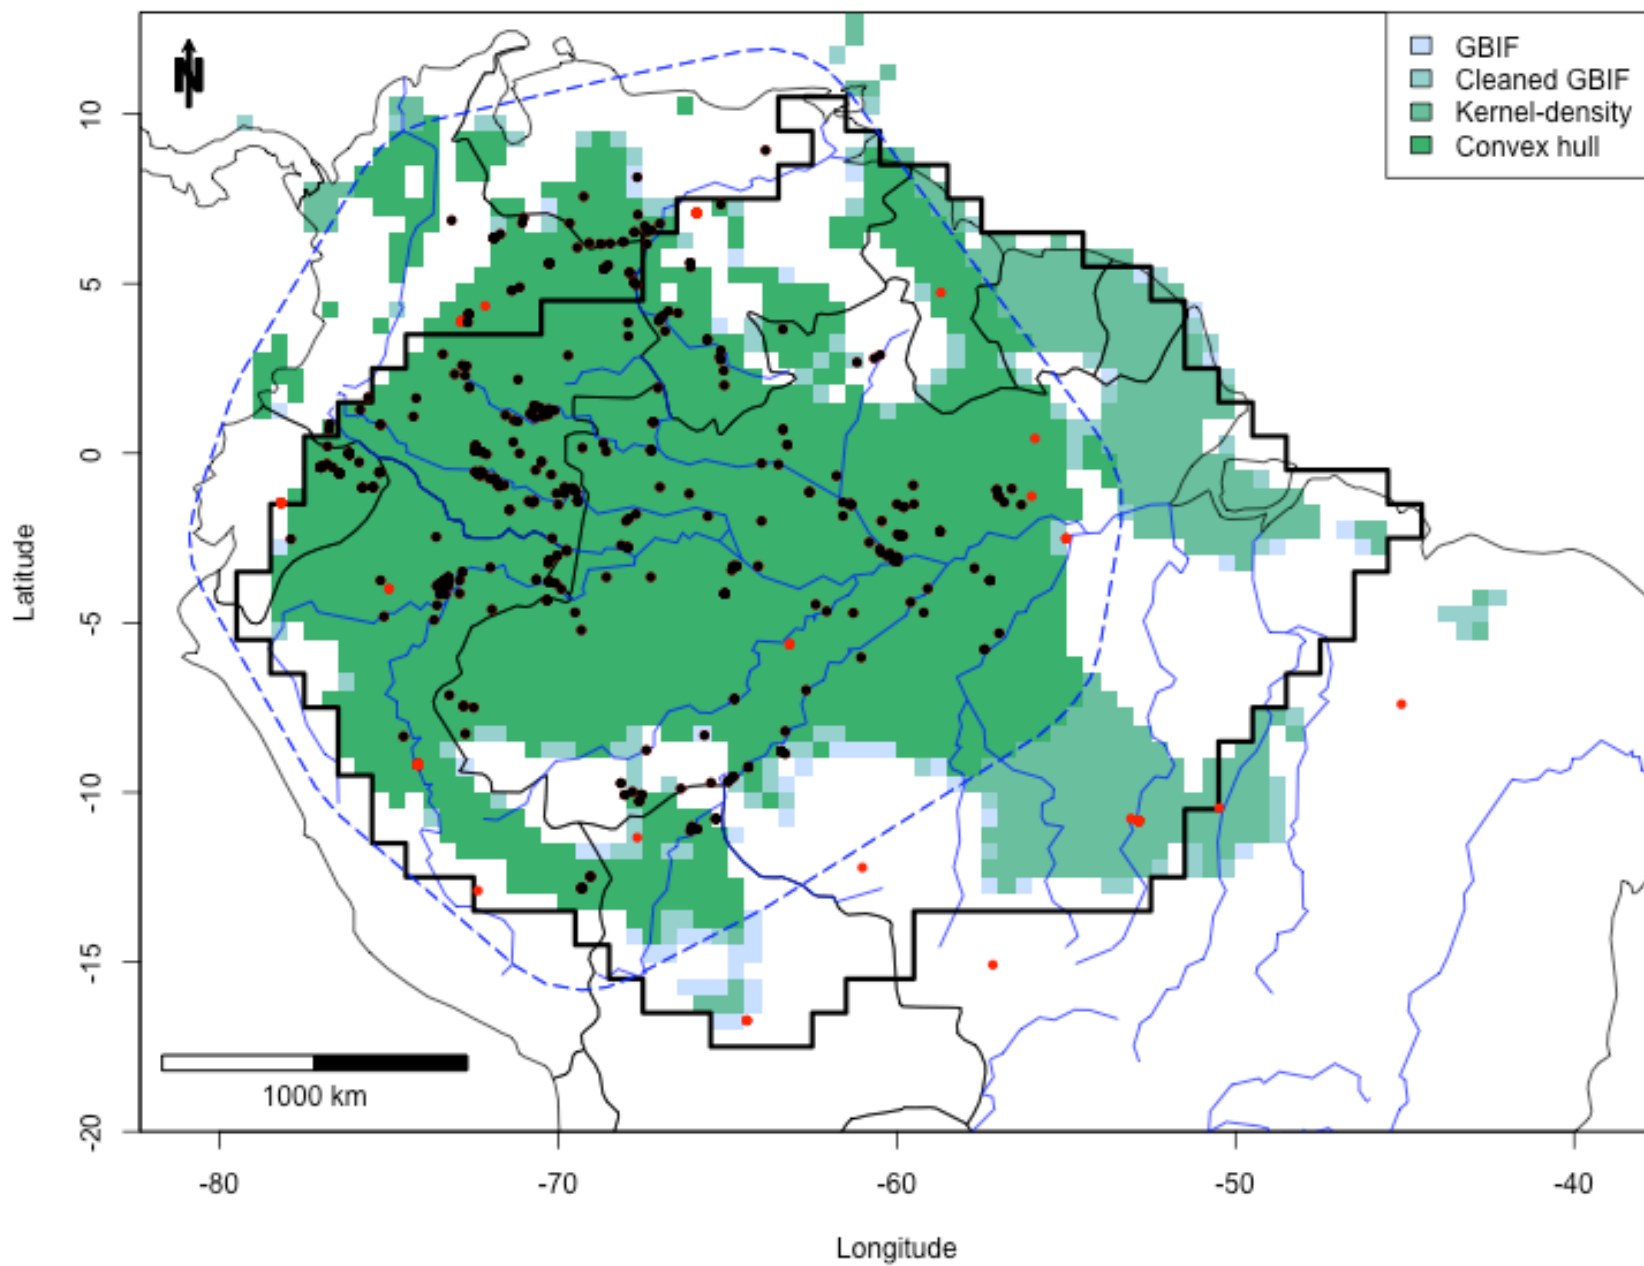



# Mabea speciosa

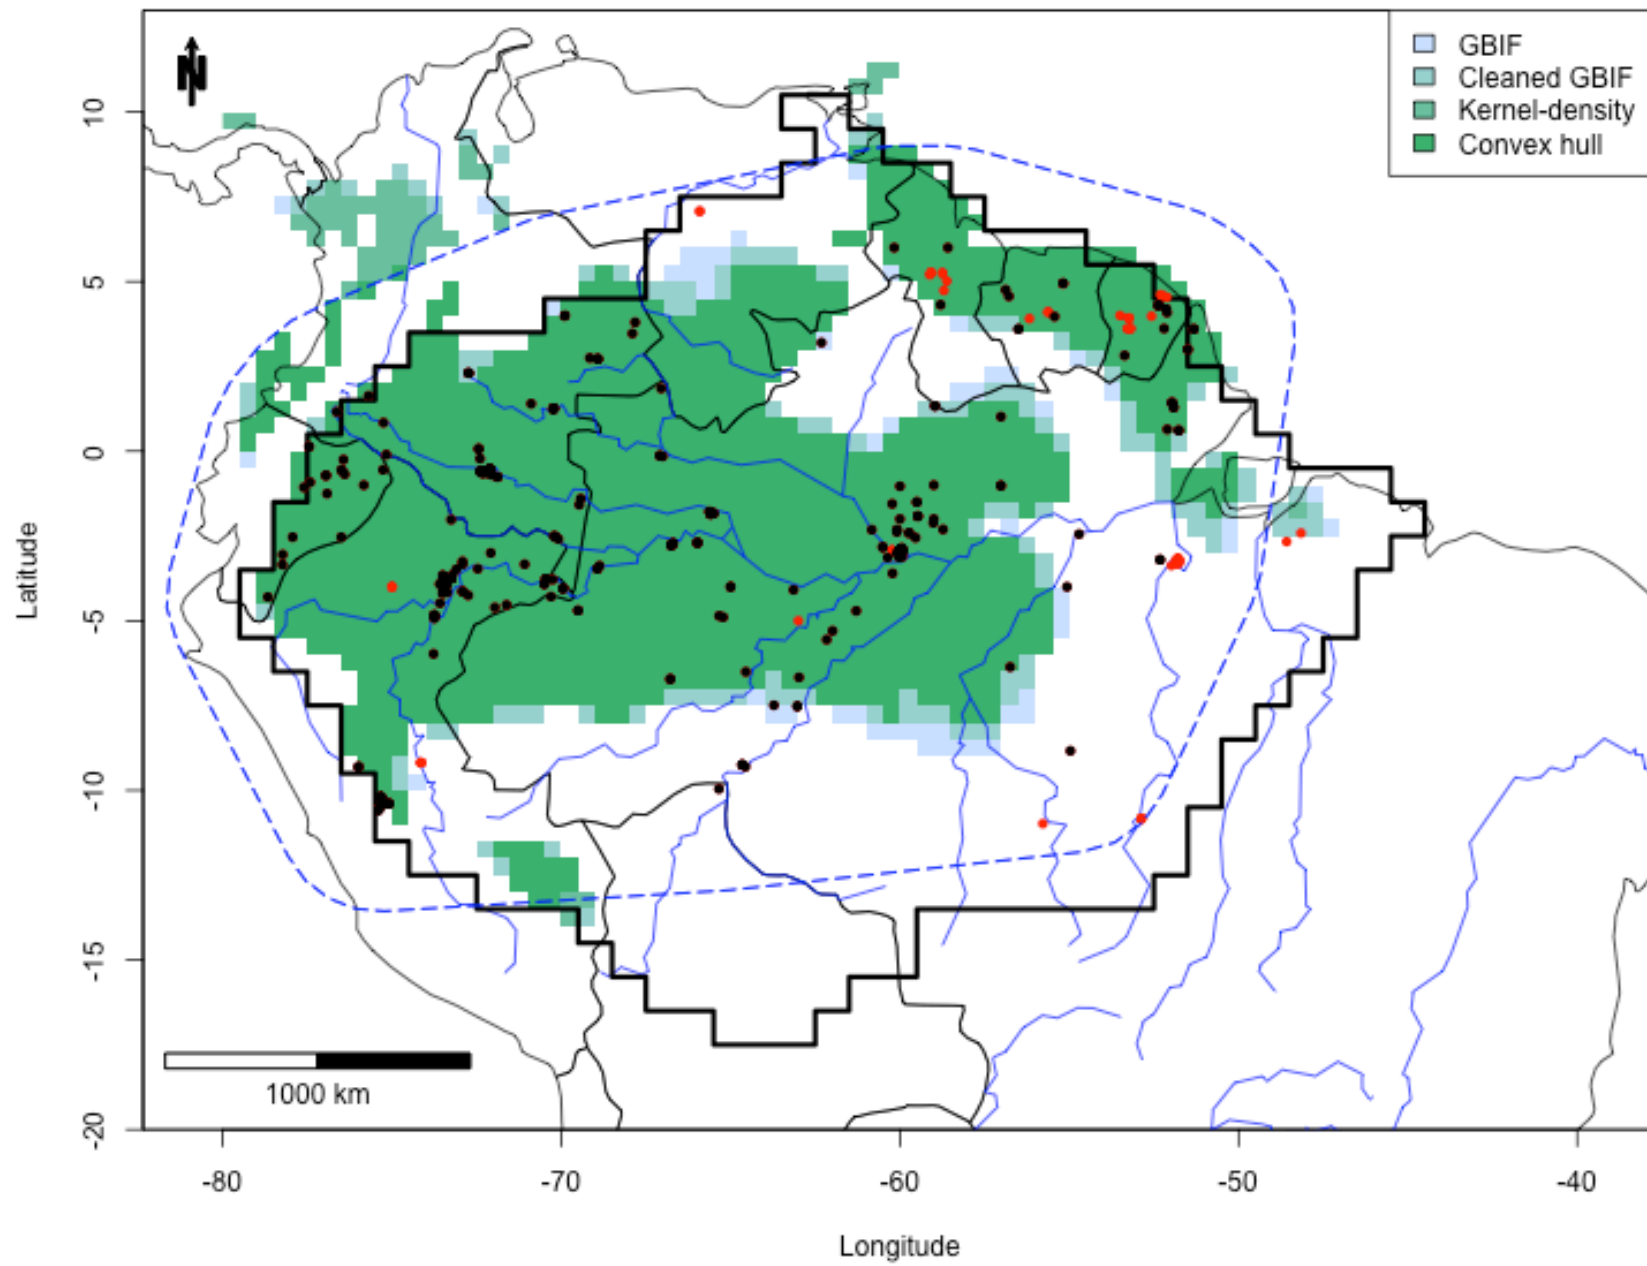



# Macrolobium acaciifolium

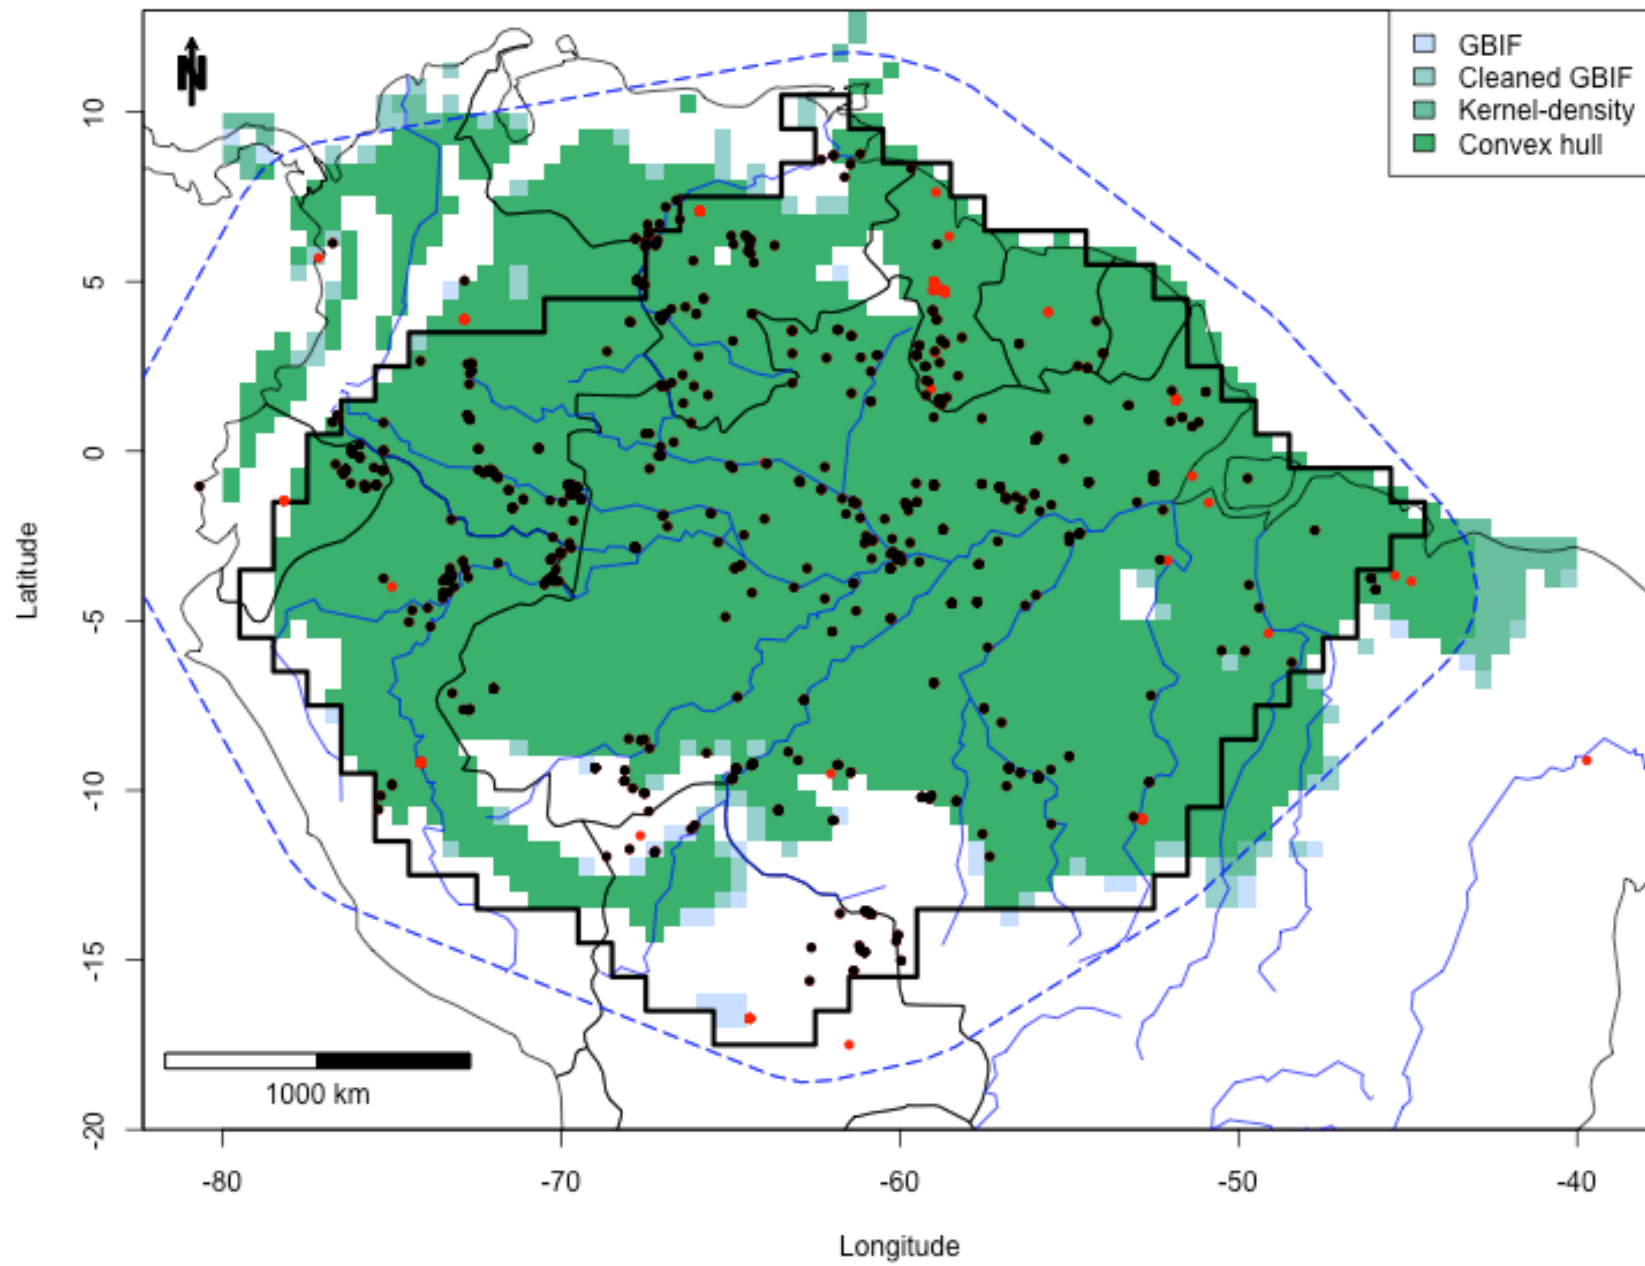

# Maclobium angustifolium

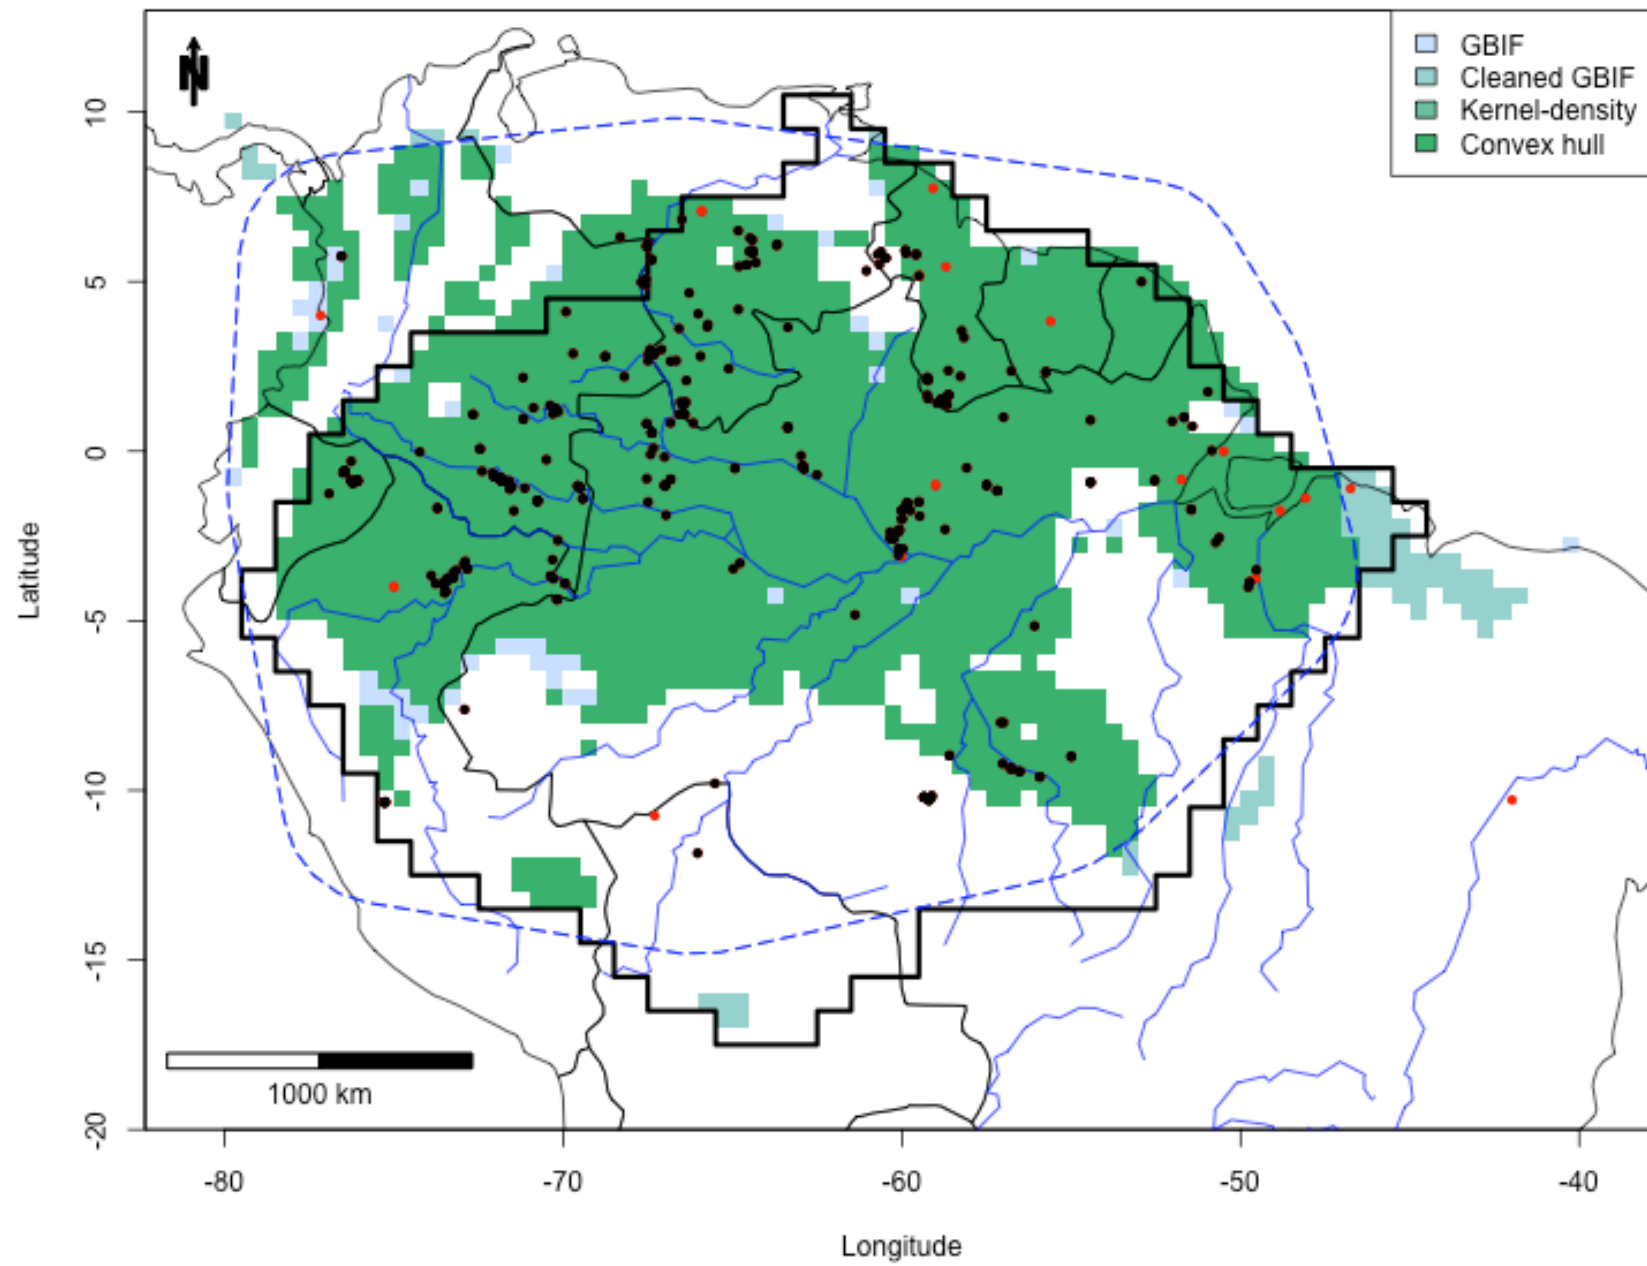

# Manilkara bidentata

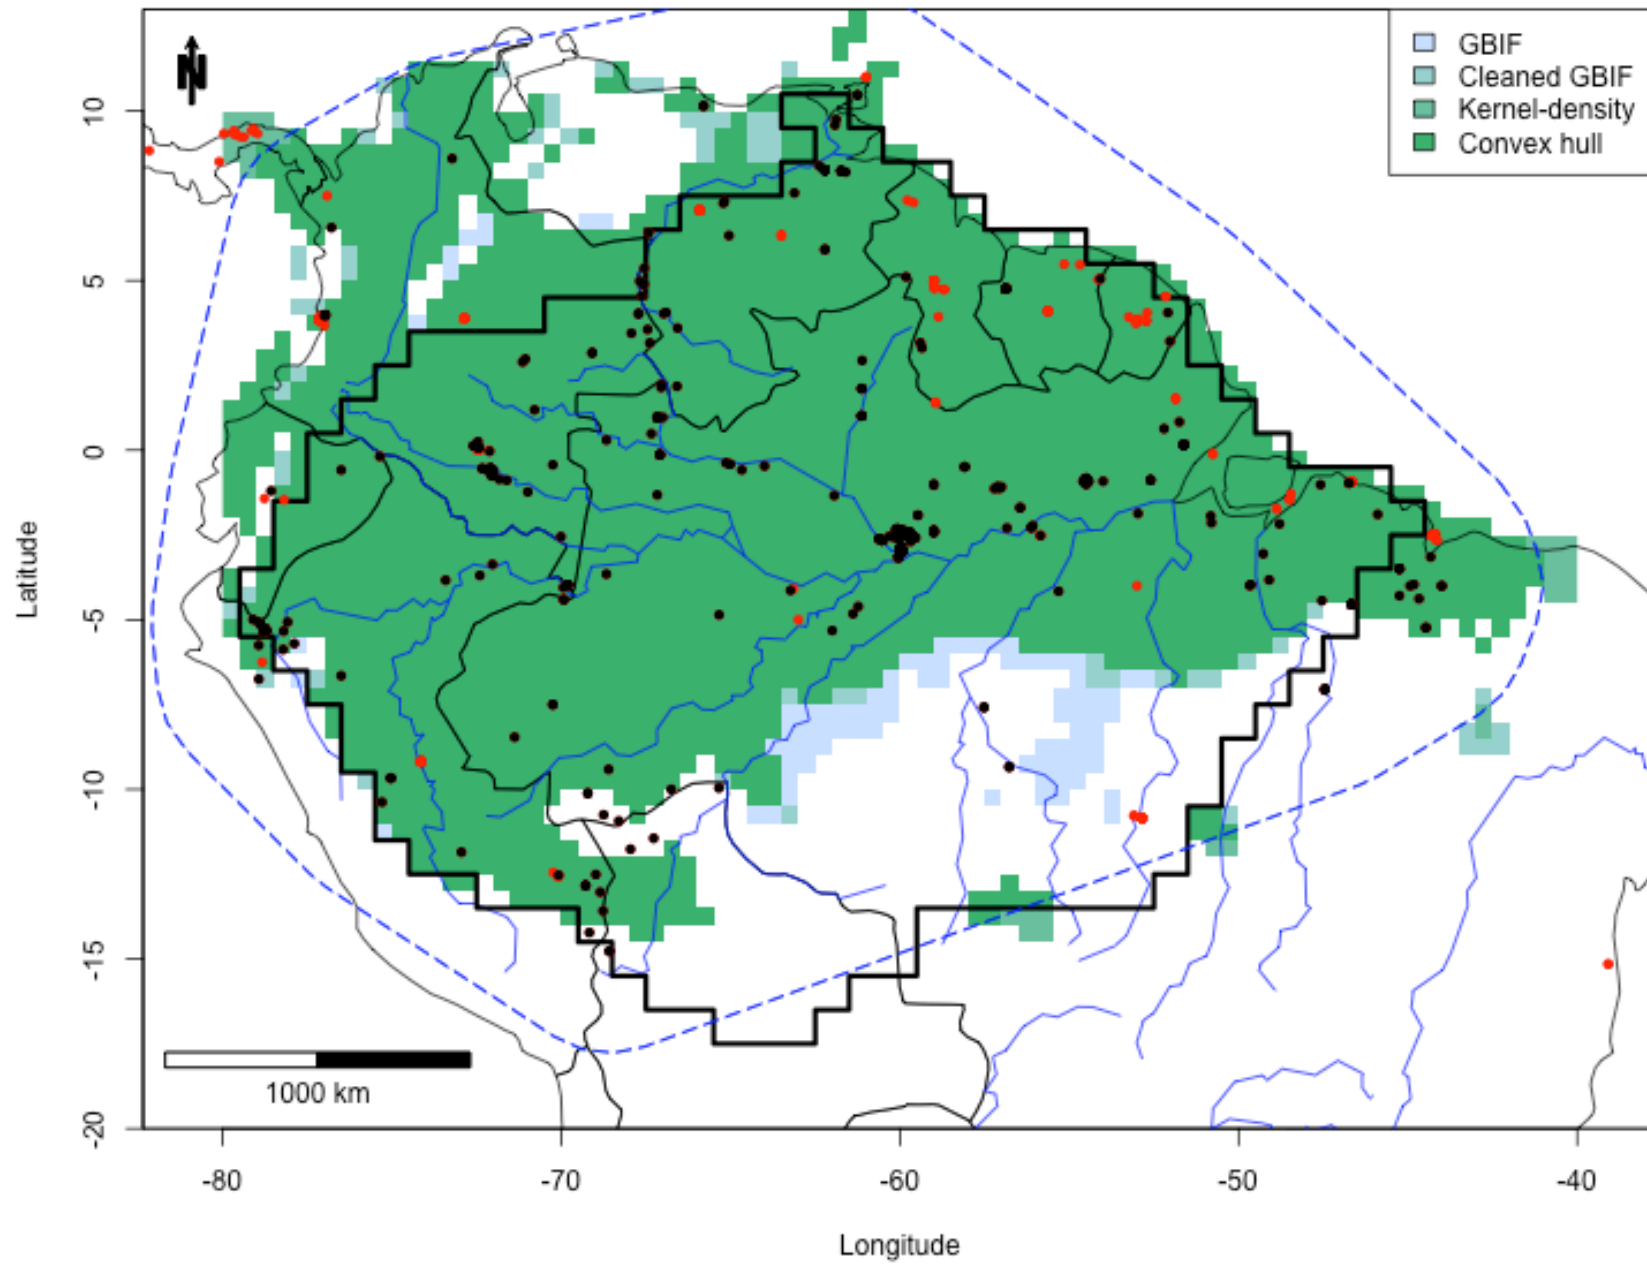

# Maquira coriacea

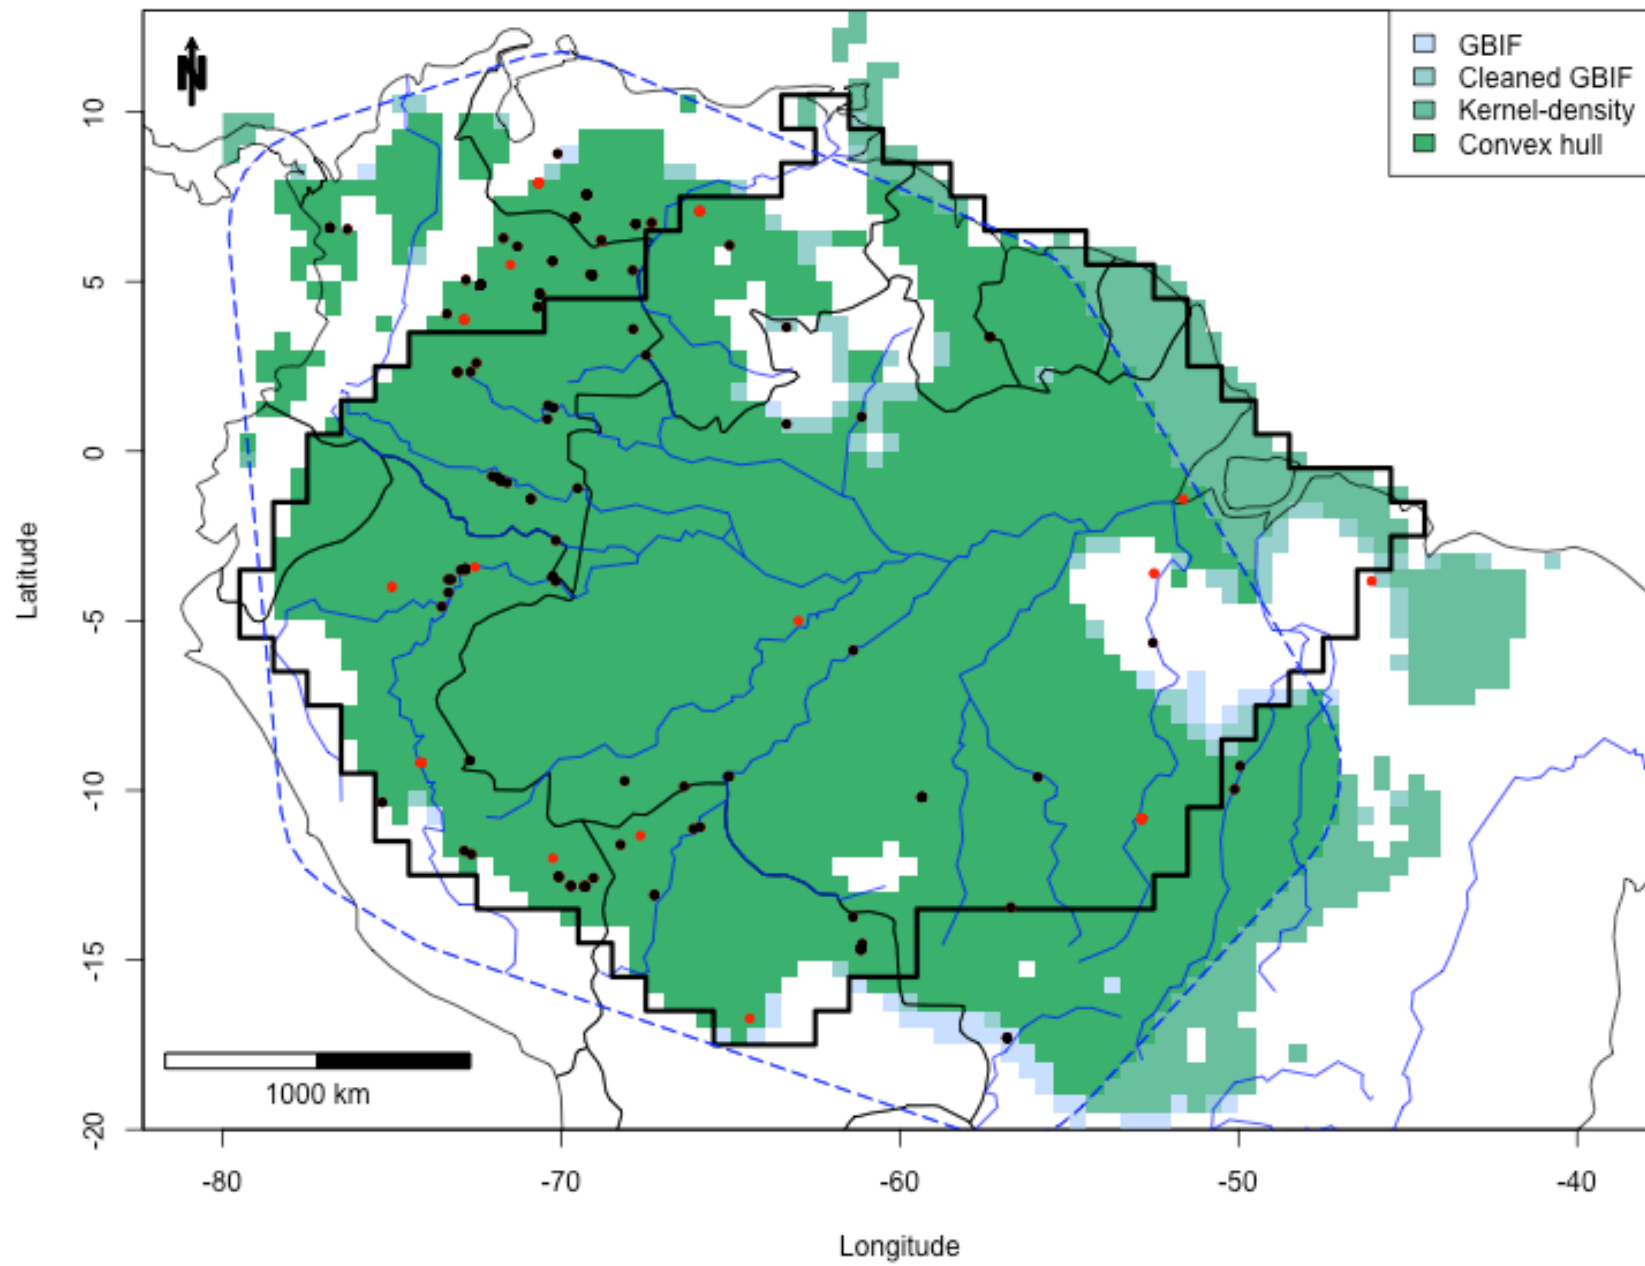

# Matayba scrobiculata

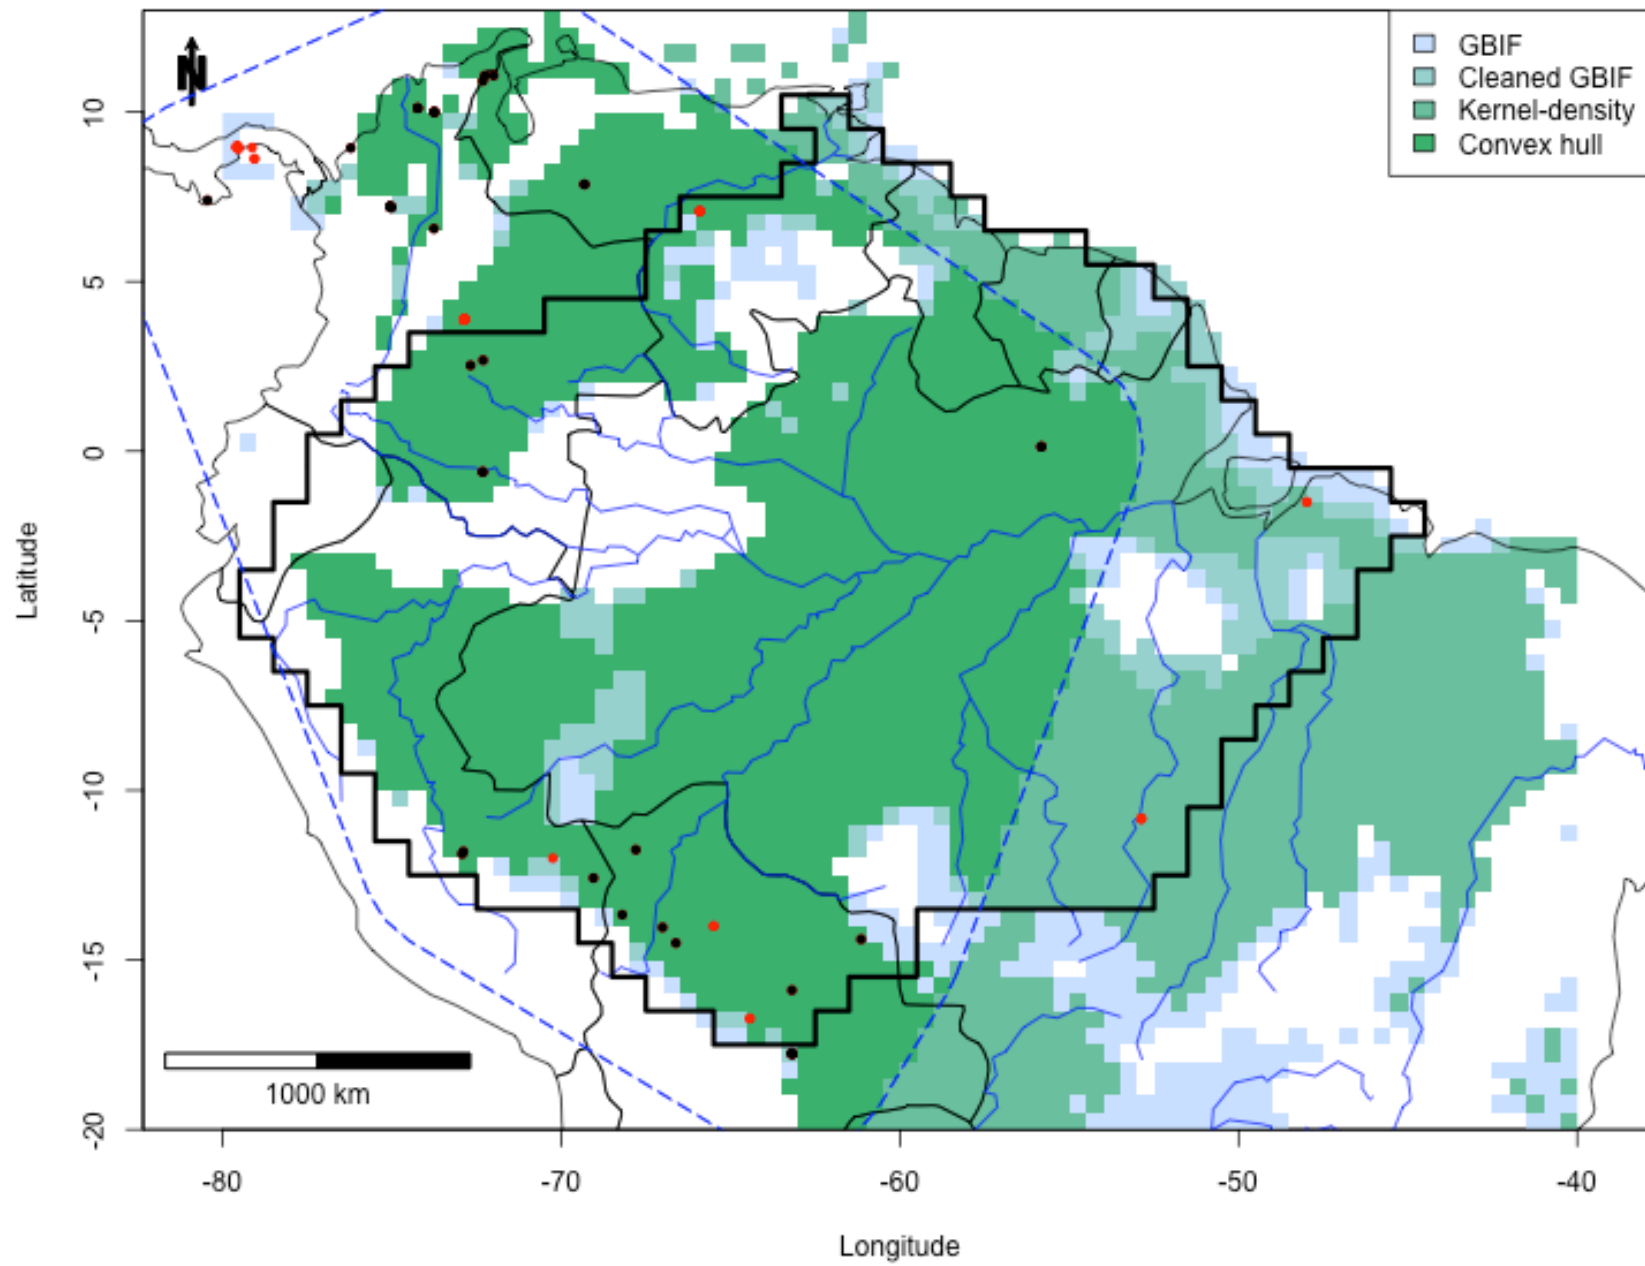

# Matisia ochrocalyx

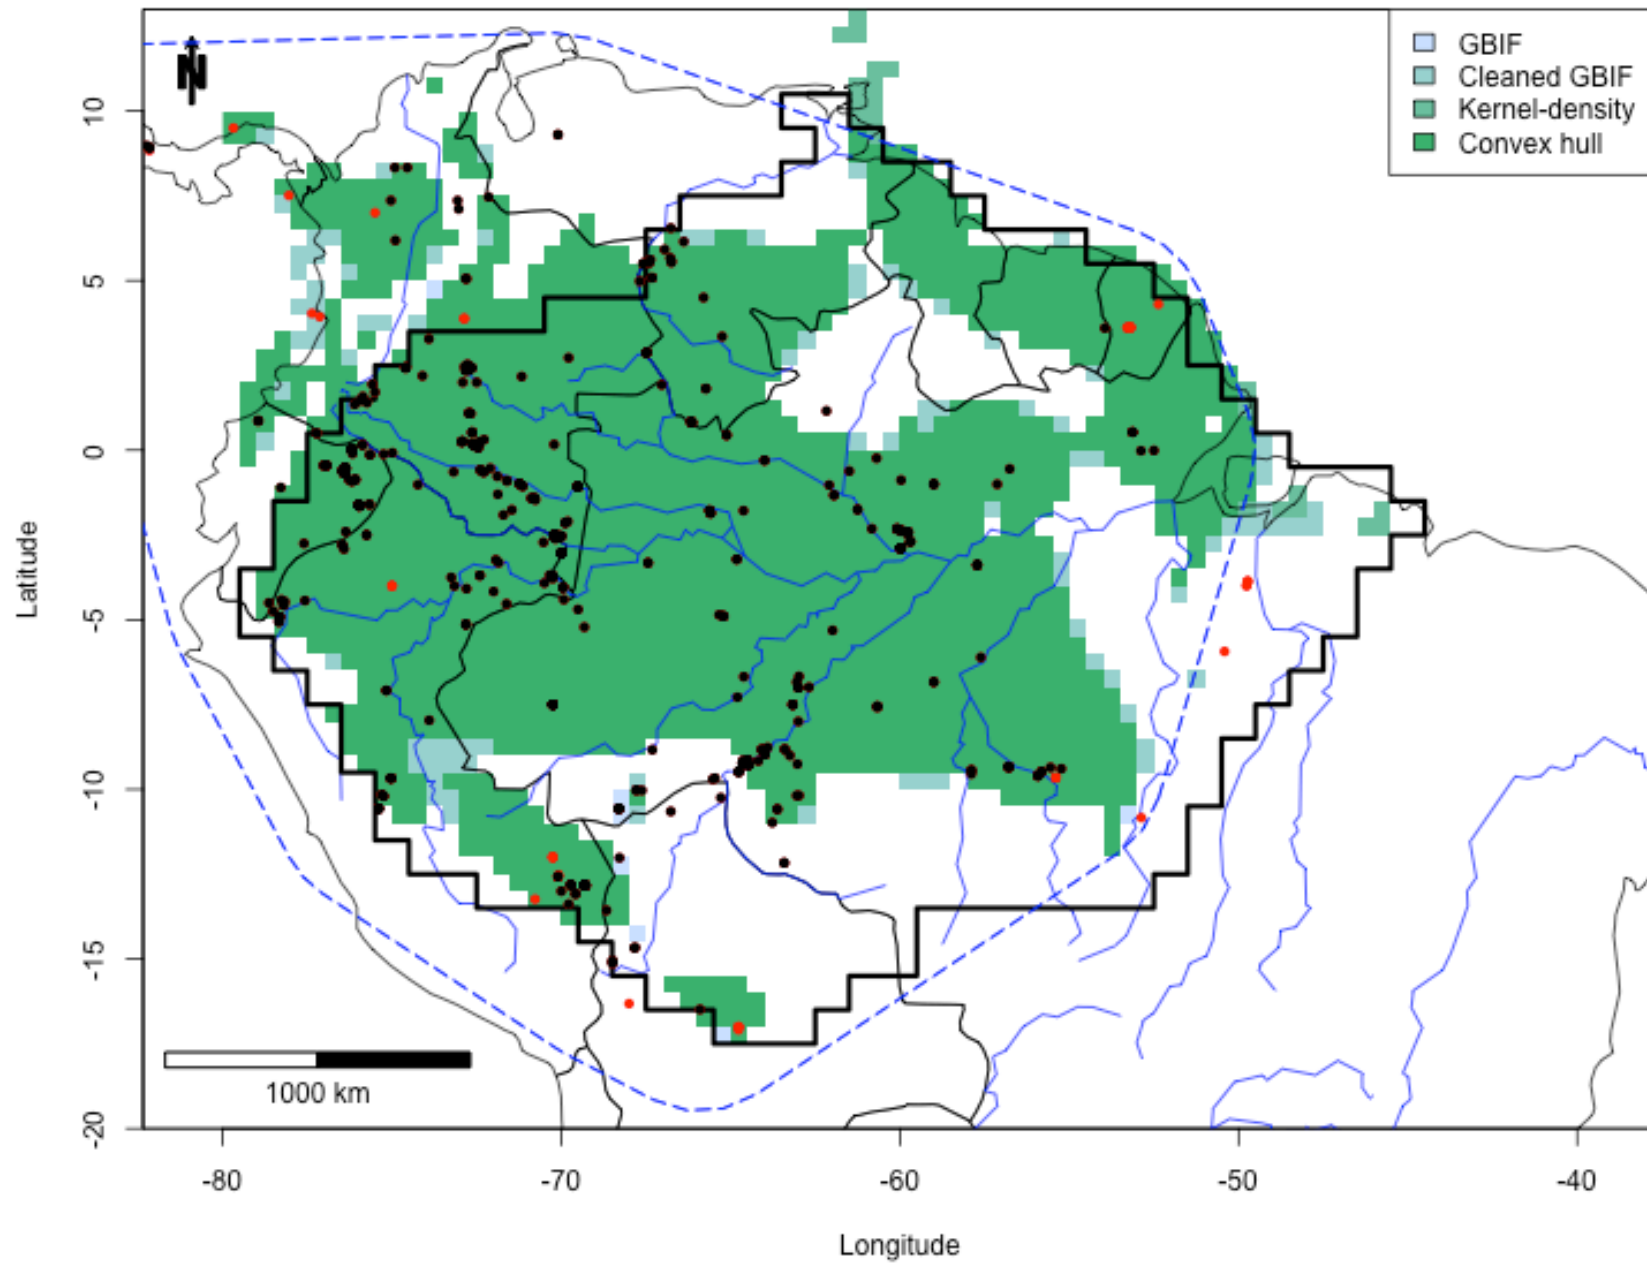

# Mauritia flexuosa

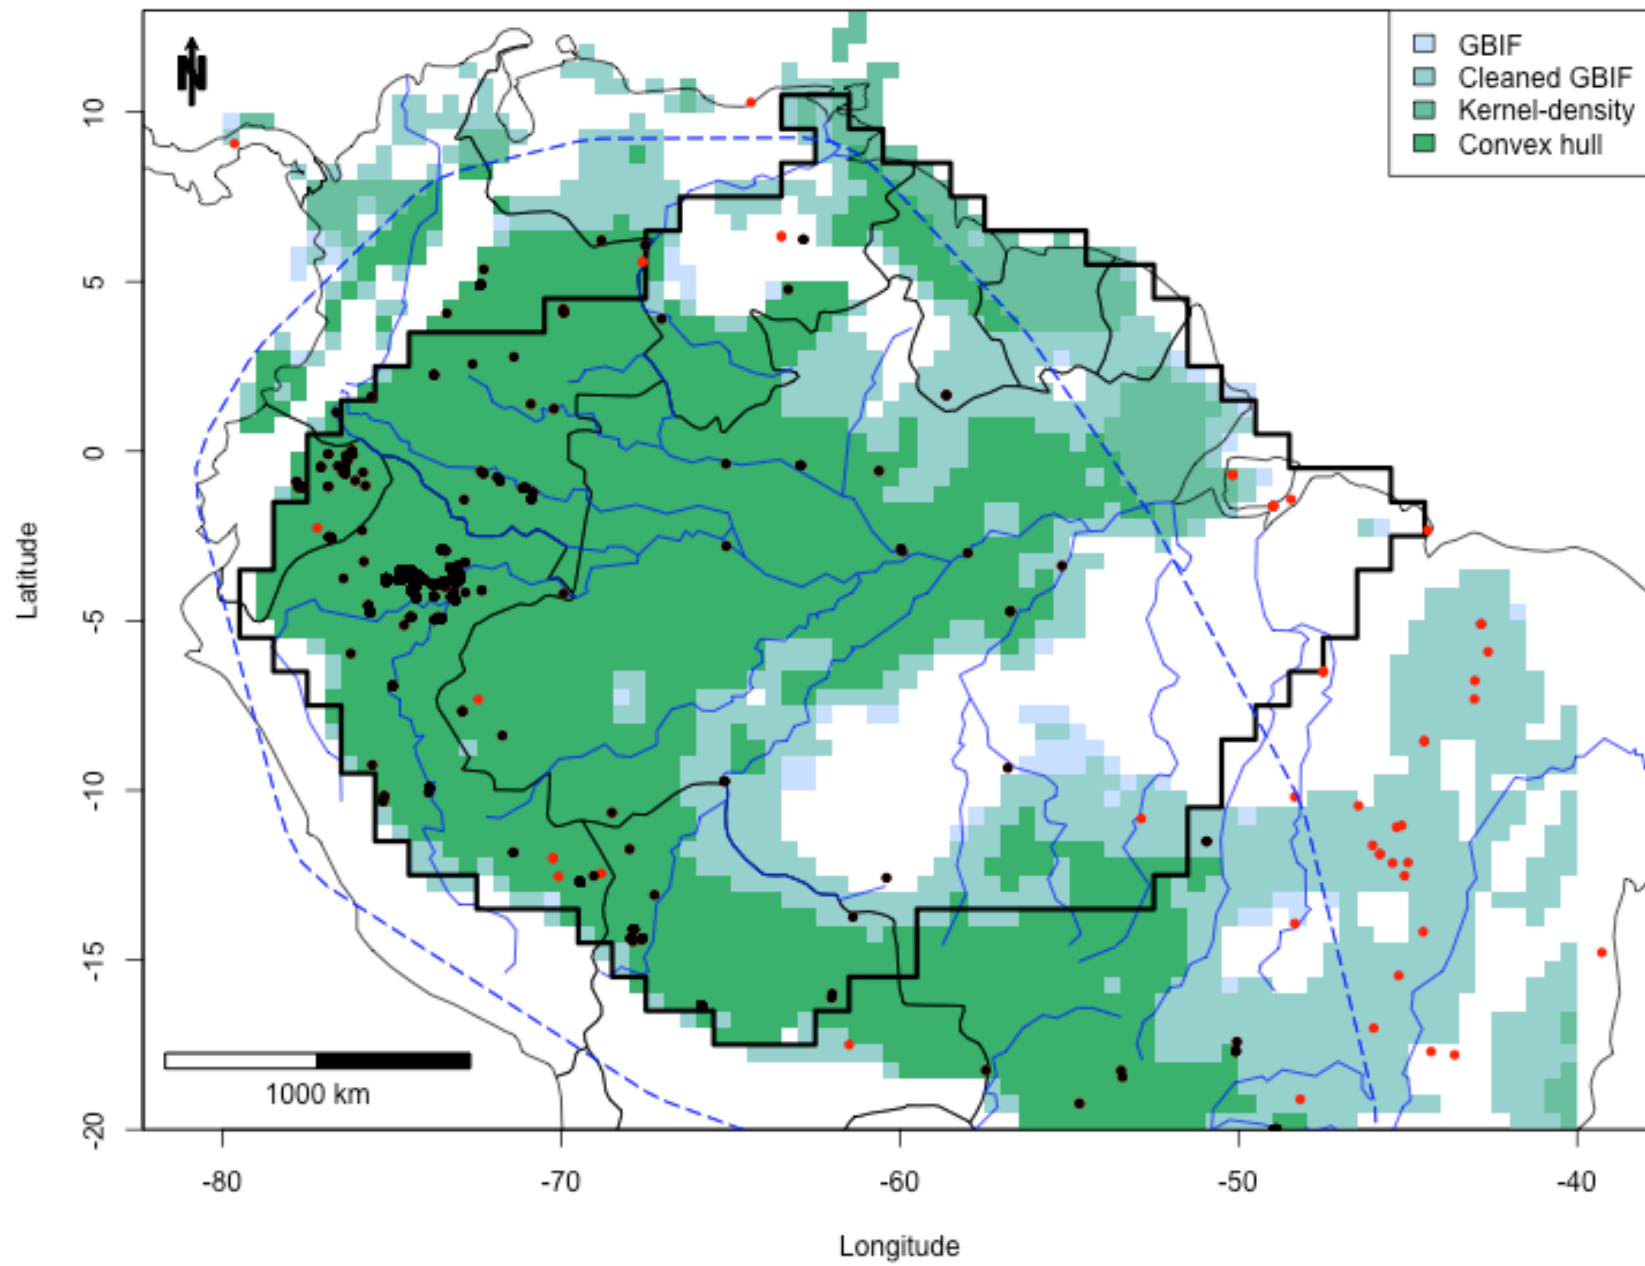



# Mauritiella aculeata

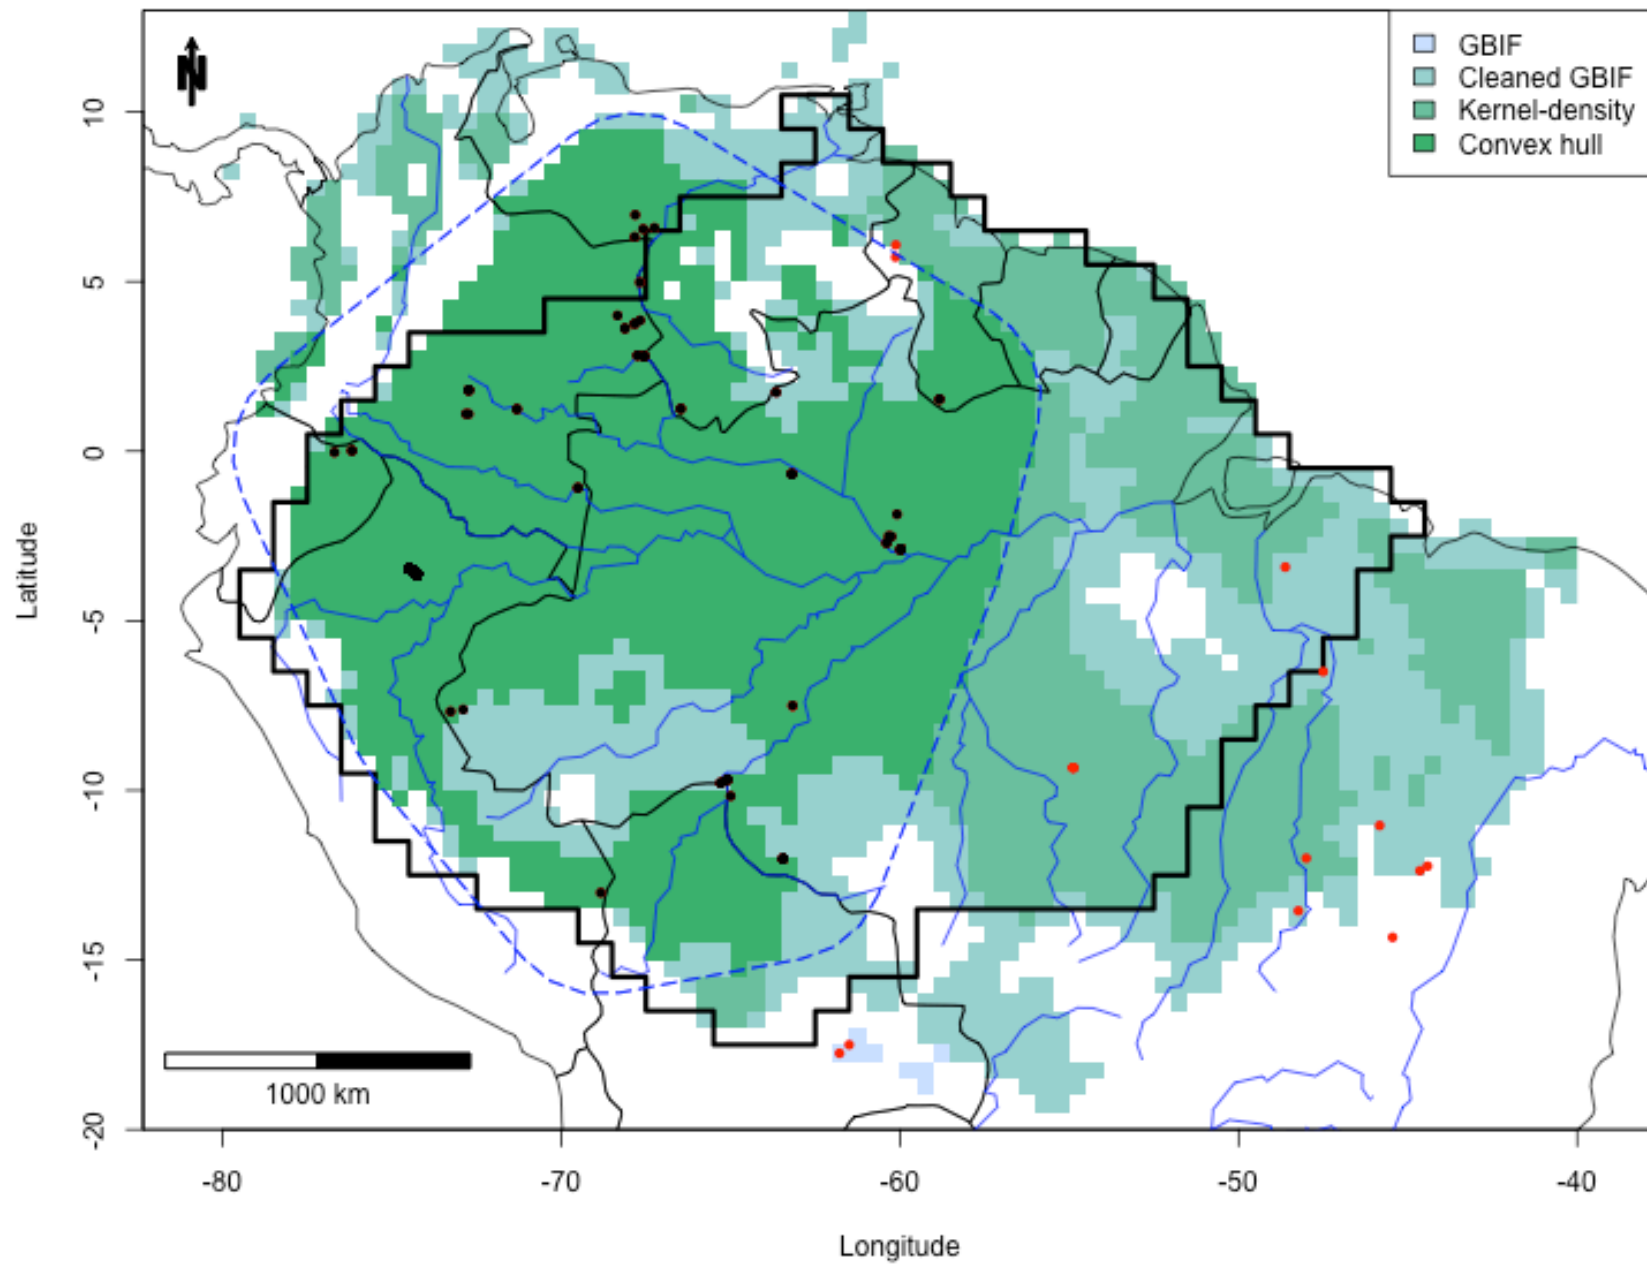

### Metrodorea flavida

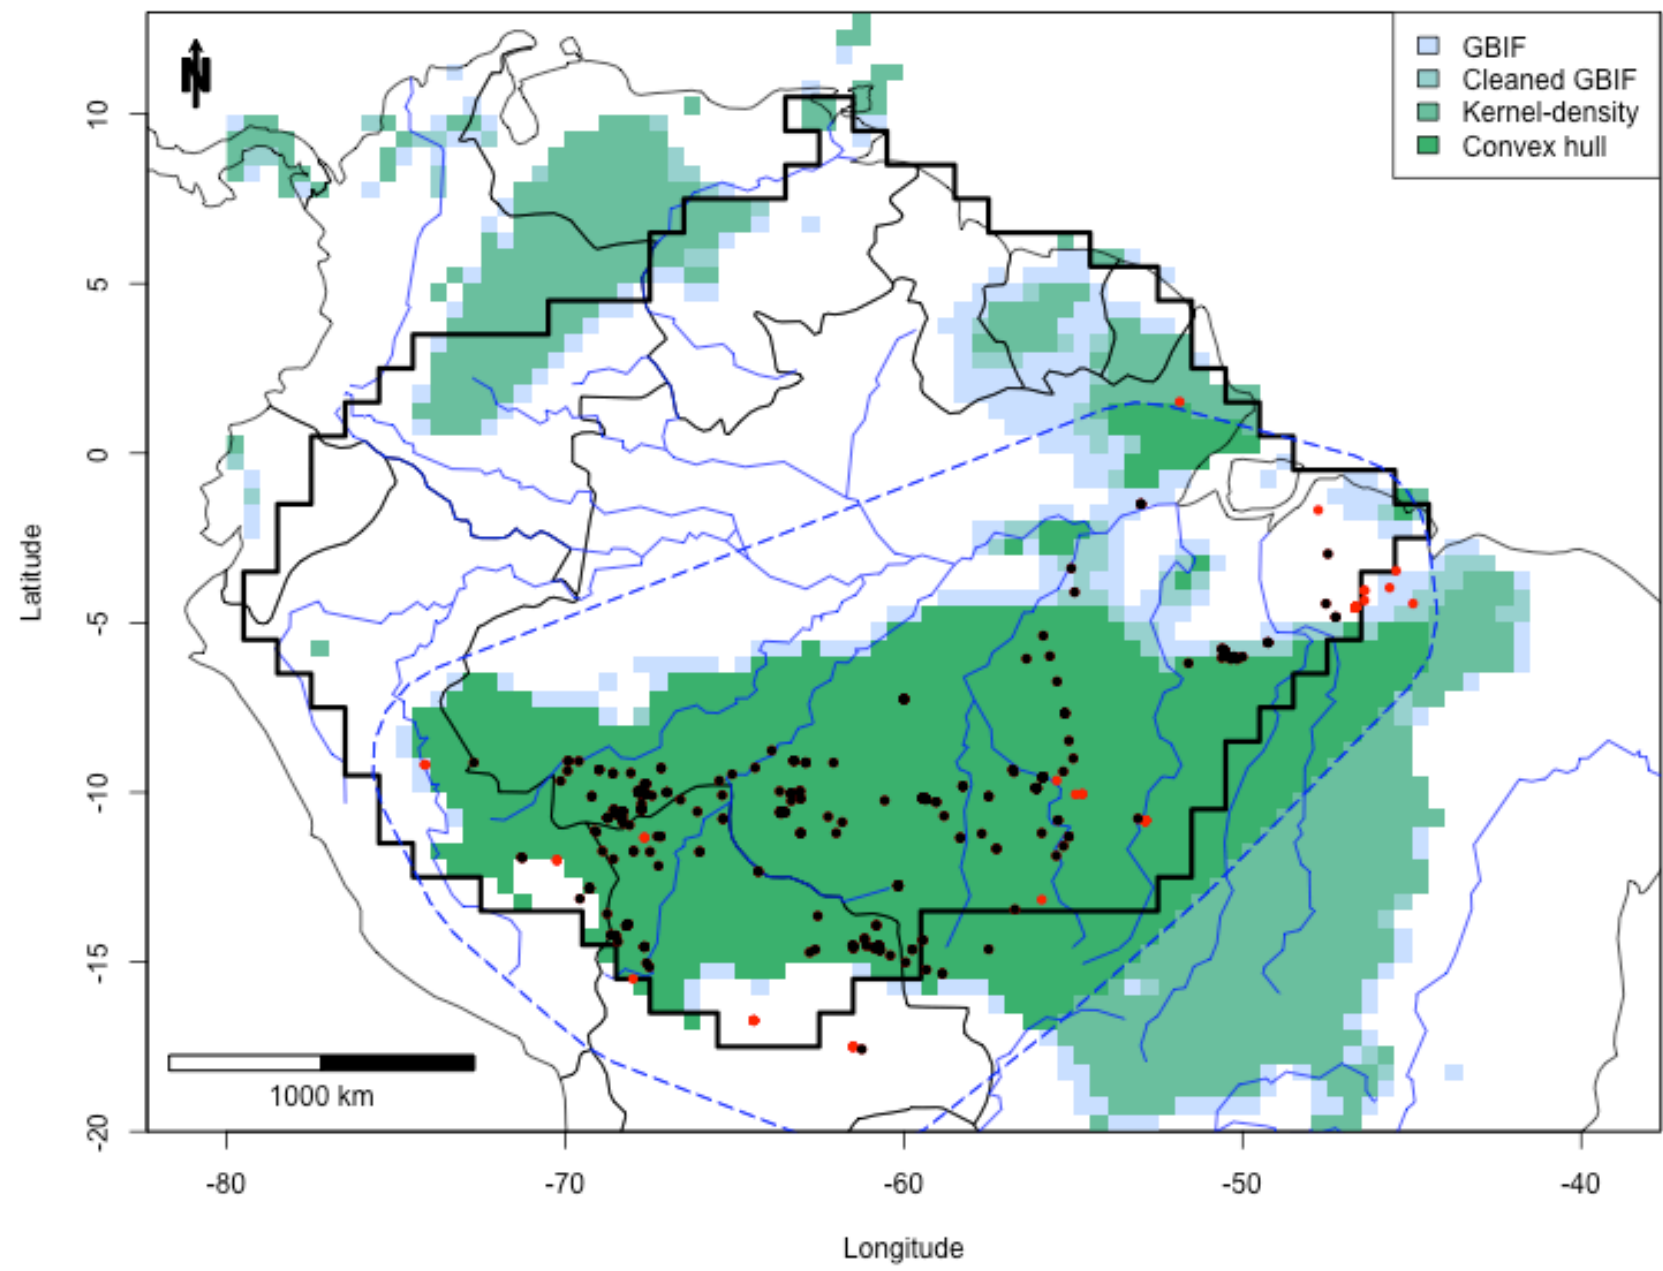

# Mezilaurus itauba

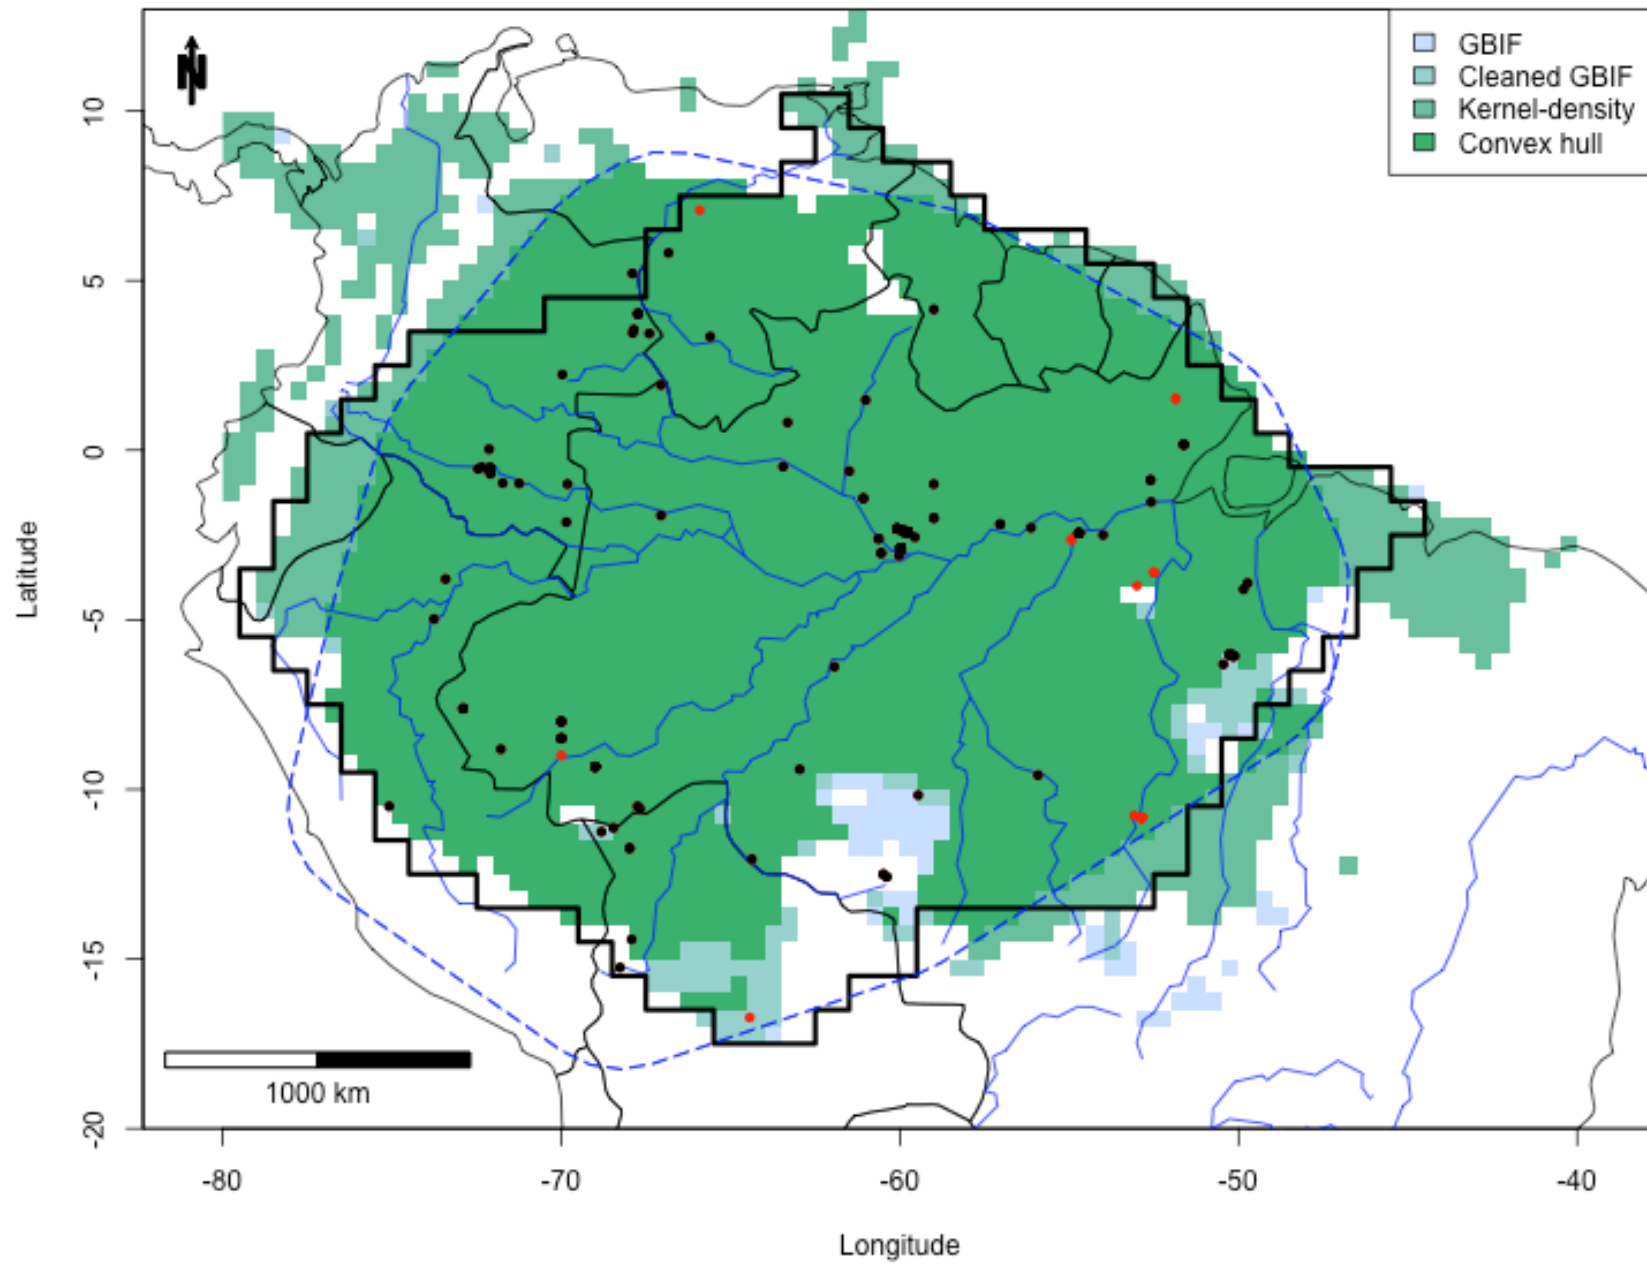

# Micrandra elata

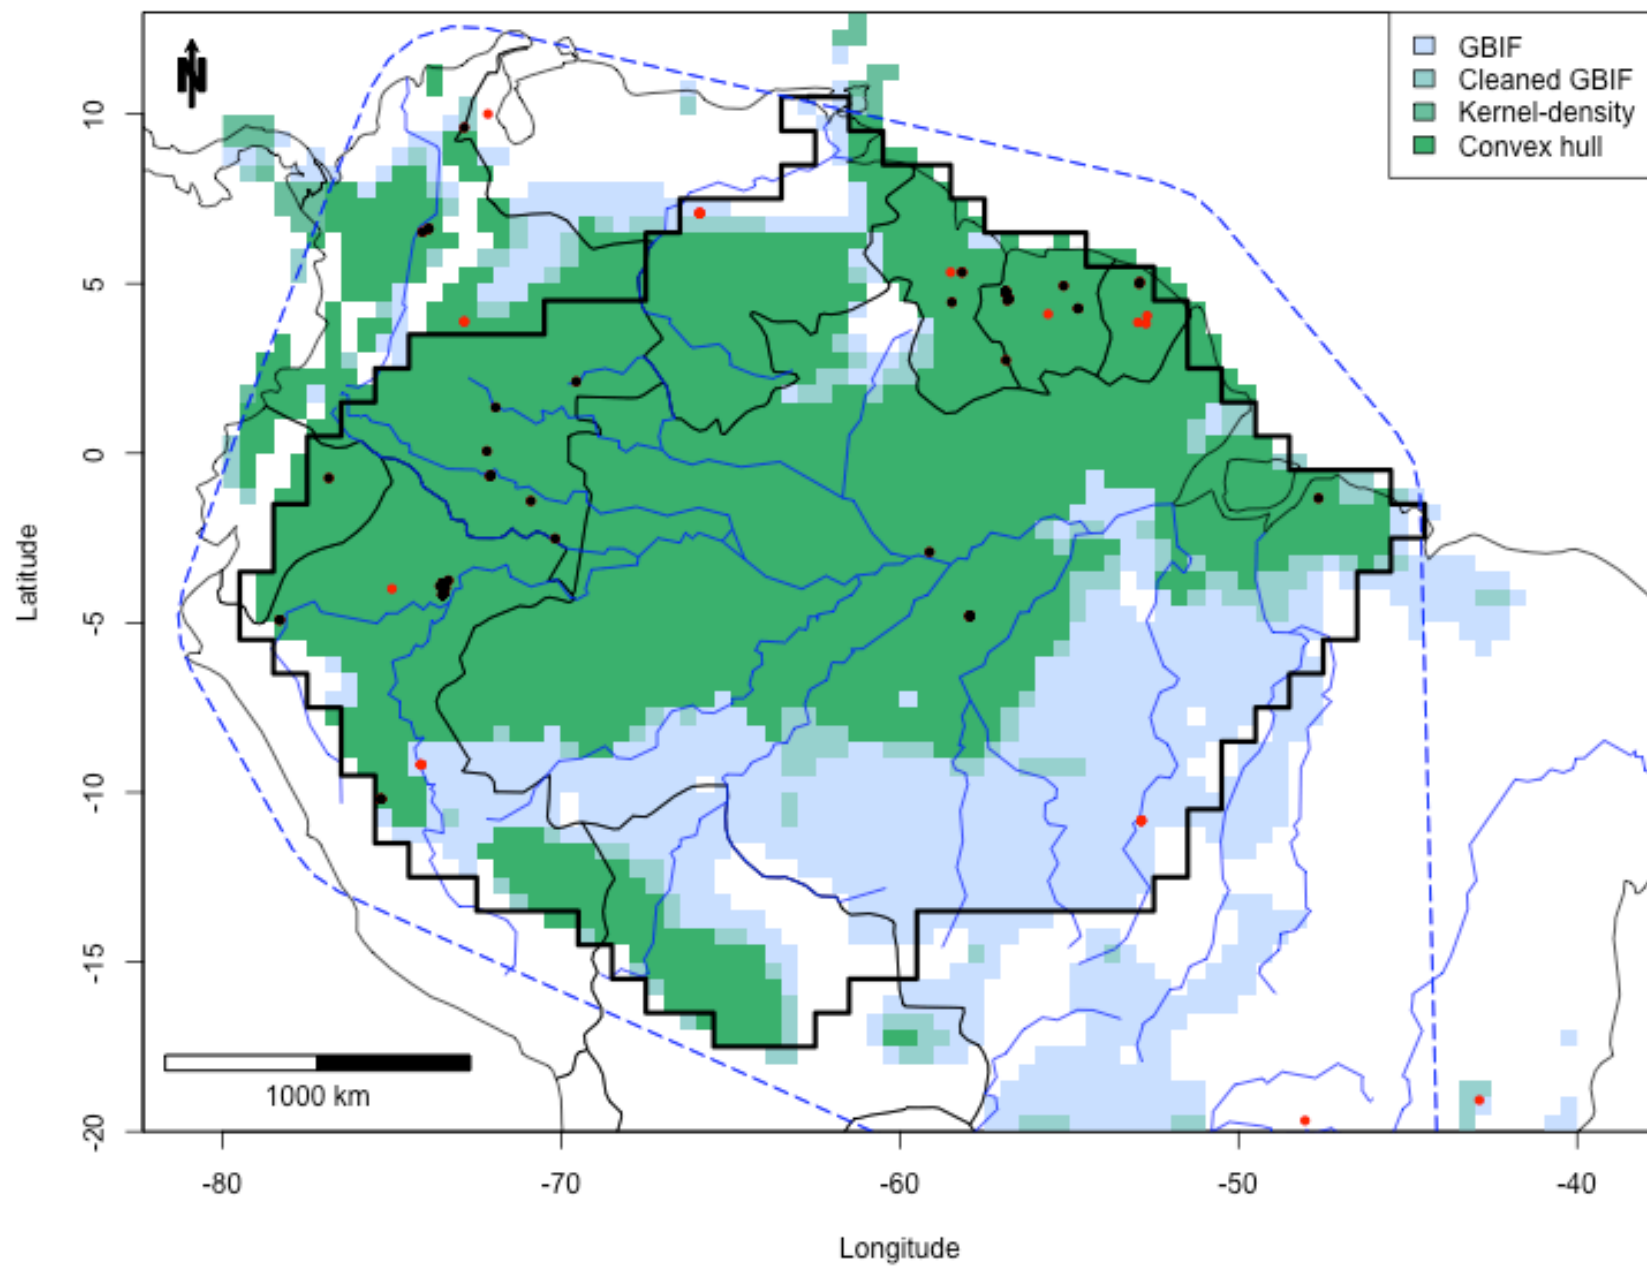

# Micrandra glabra

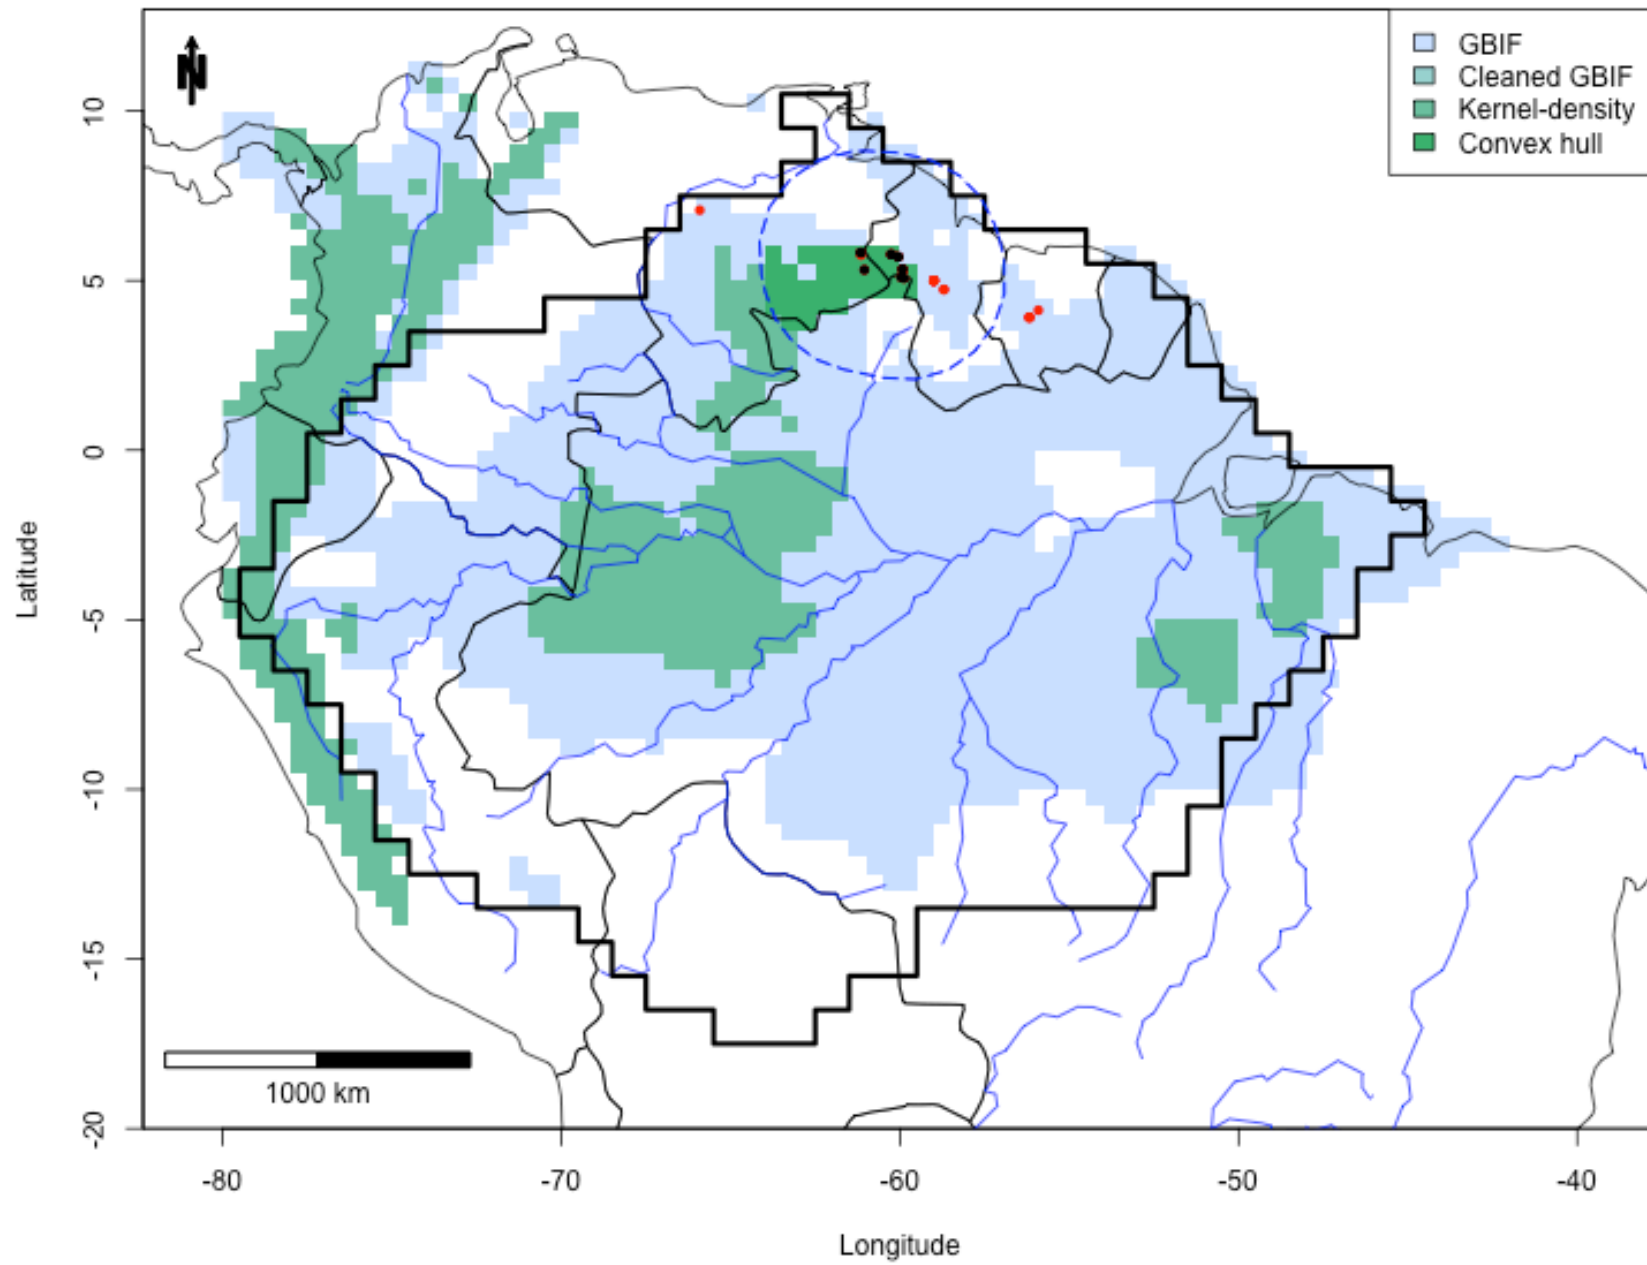

# Micrandra spruceana

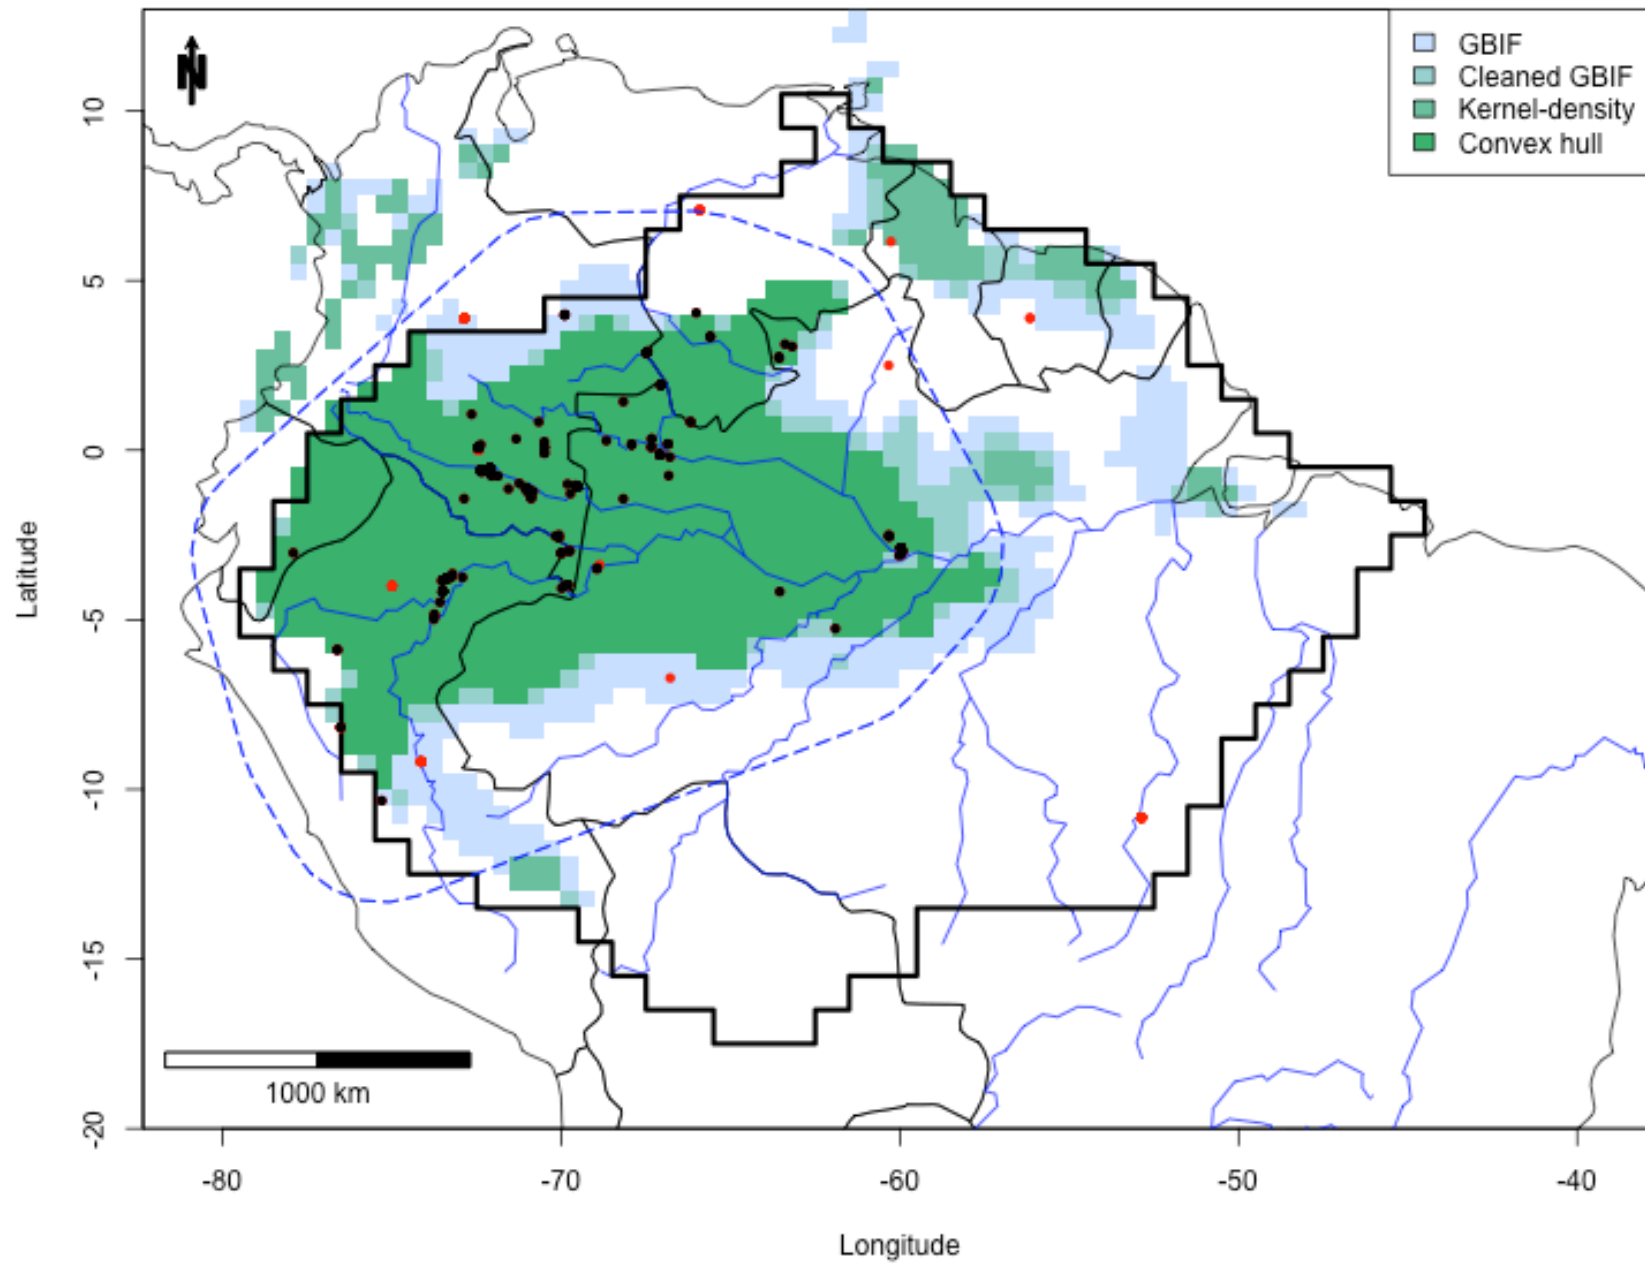

# Micrandra sprucei

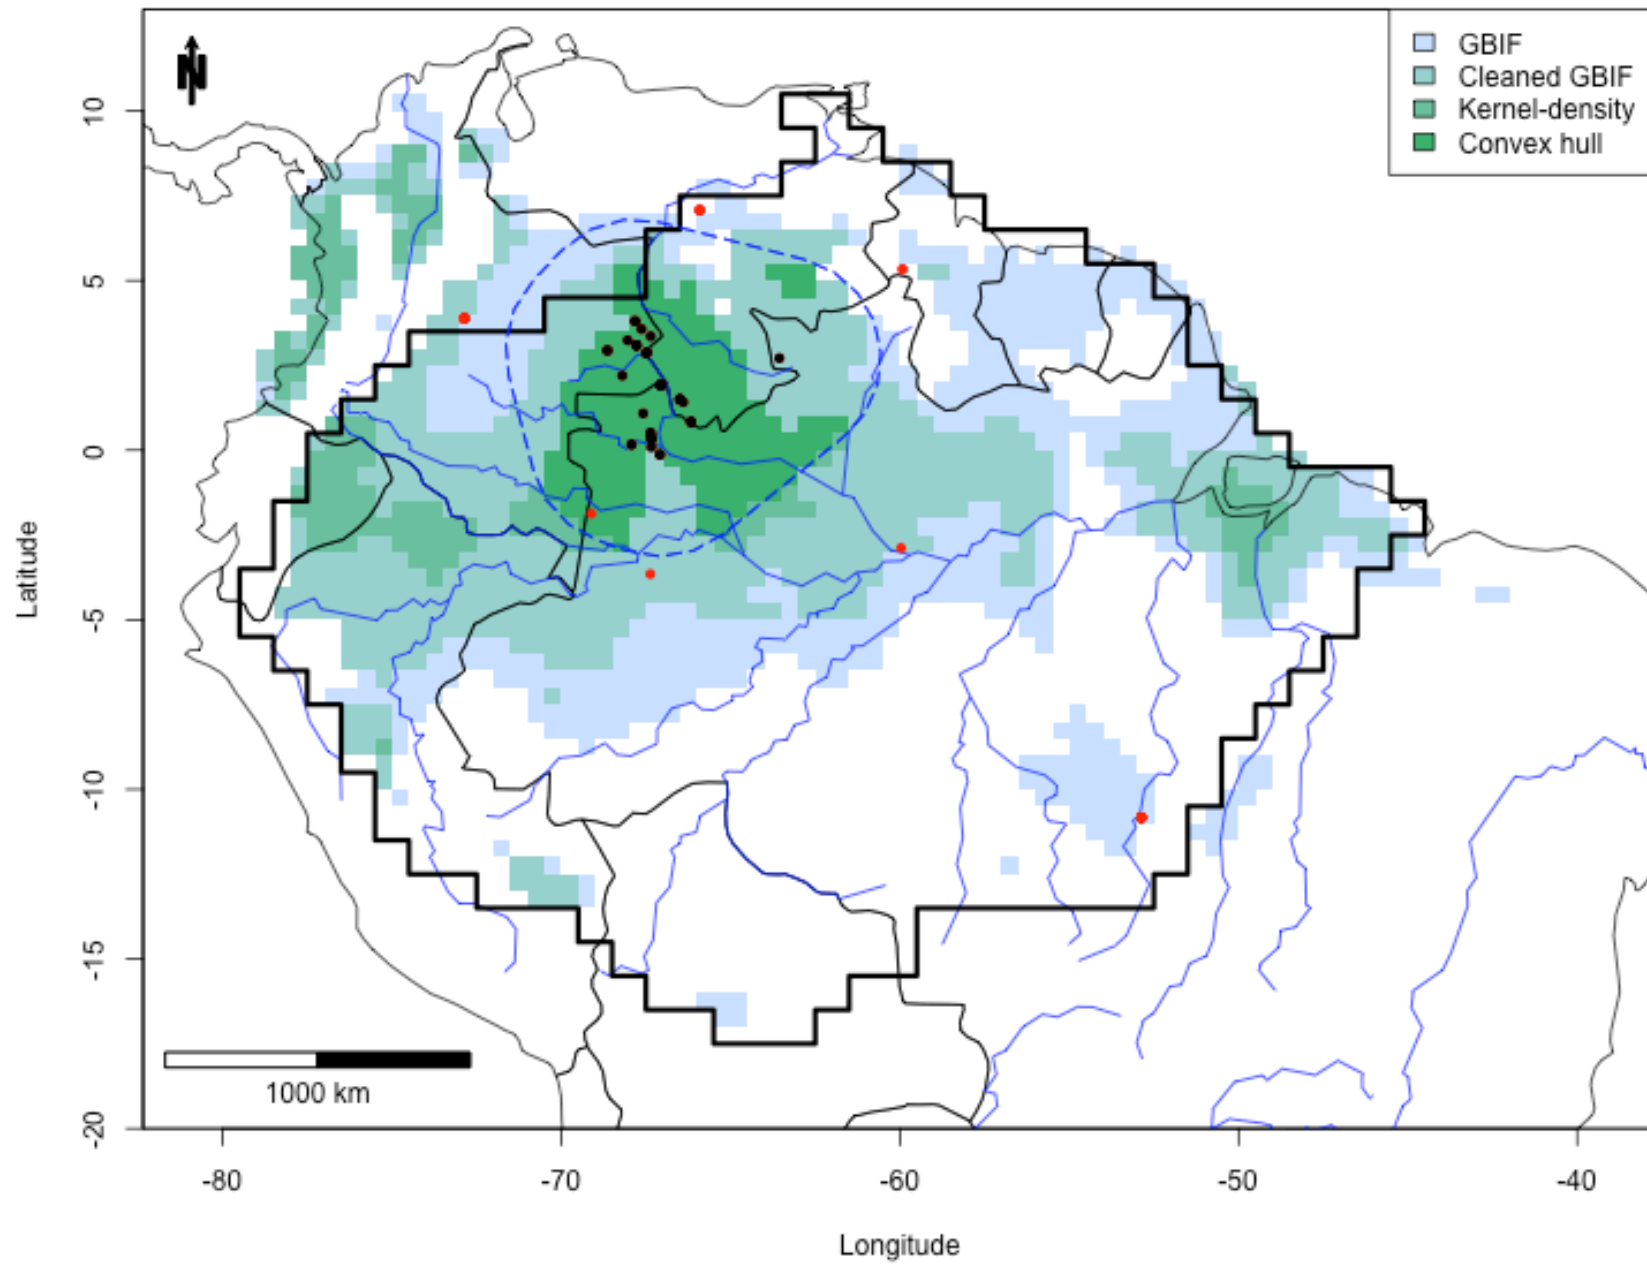



# Micropholis gardneriana

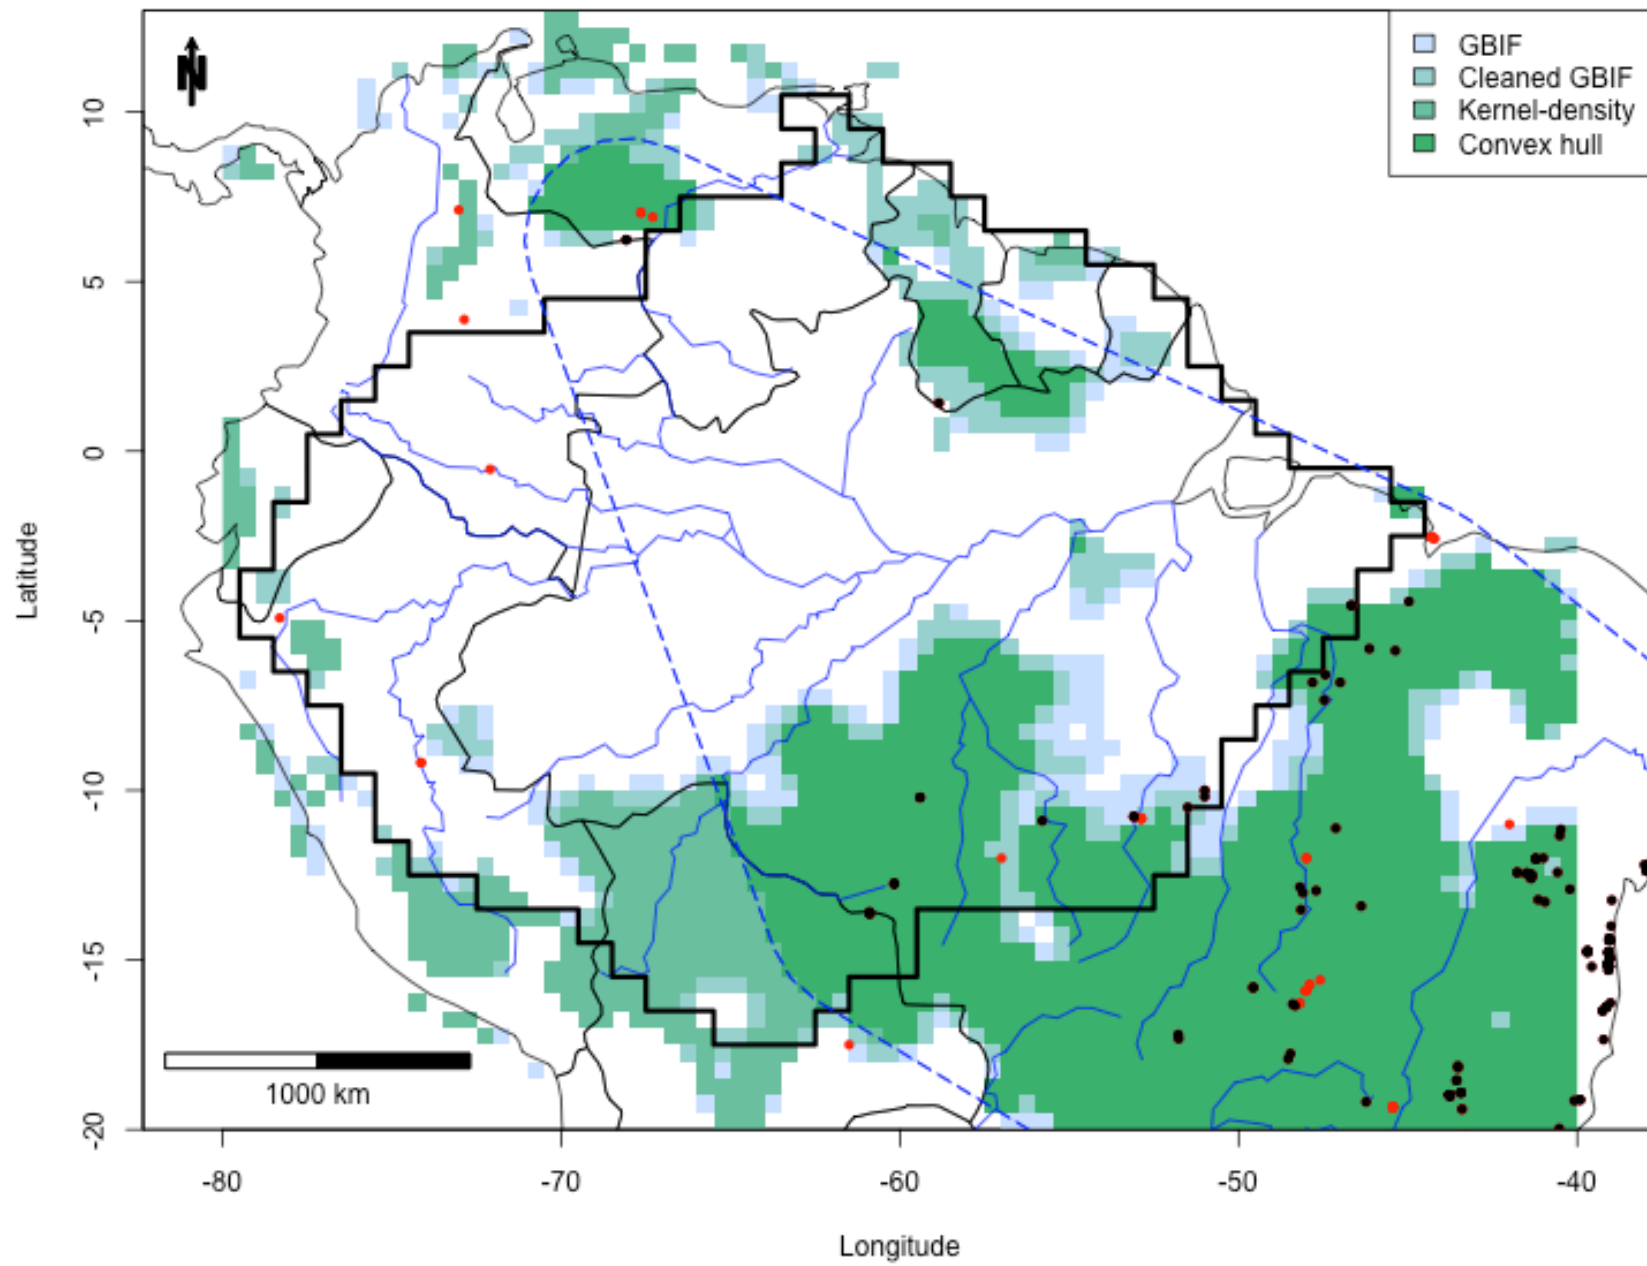

# Micropholis guyanensis

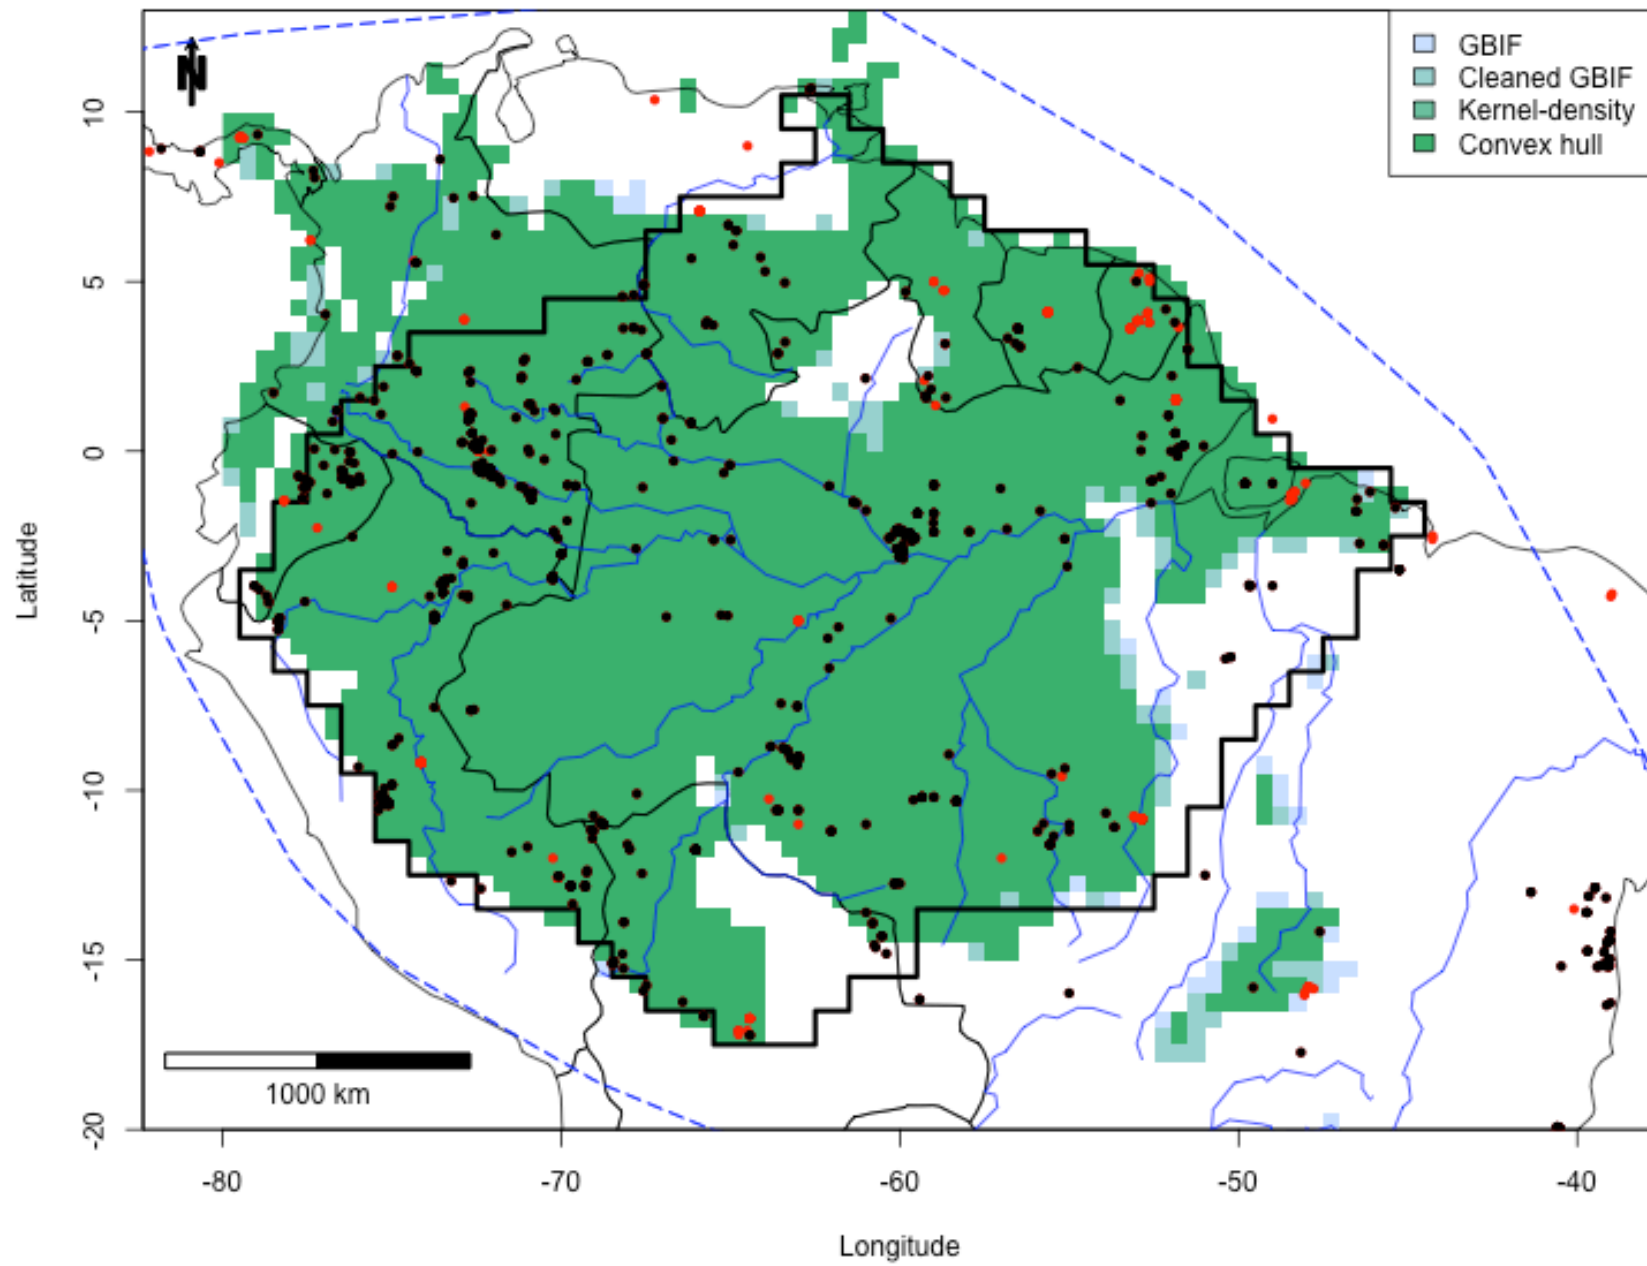

# Micropholis venulosa

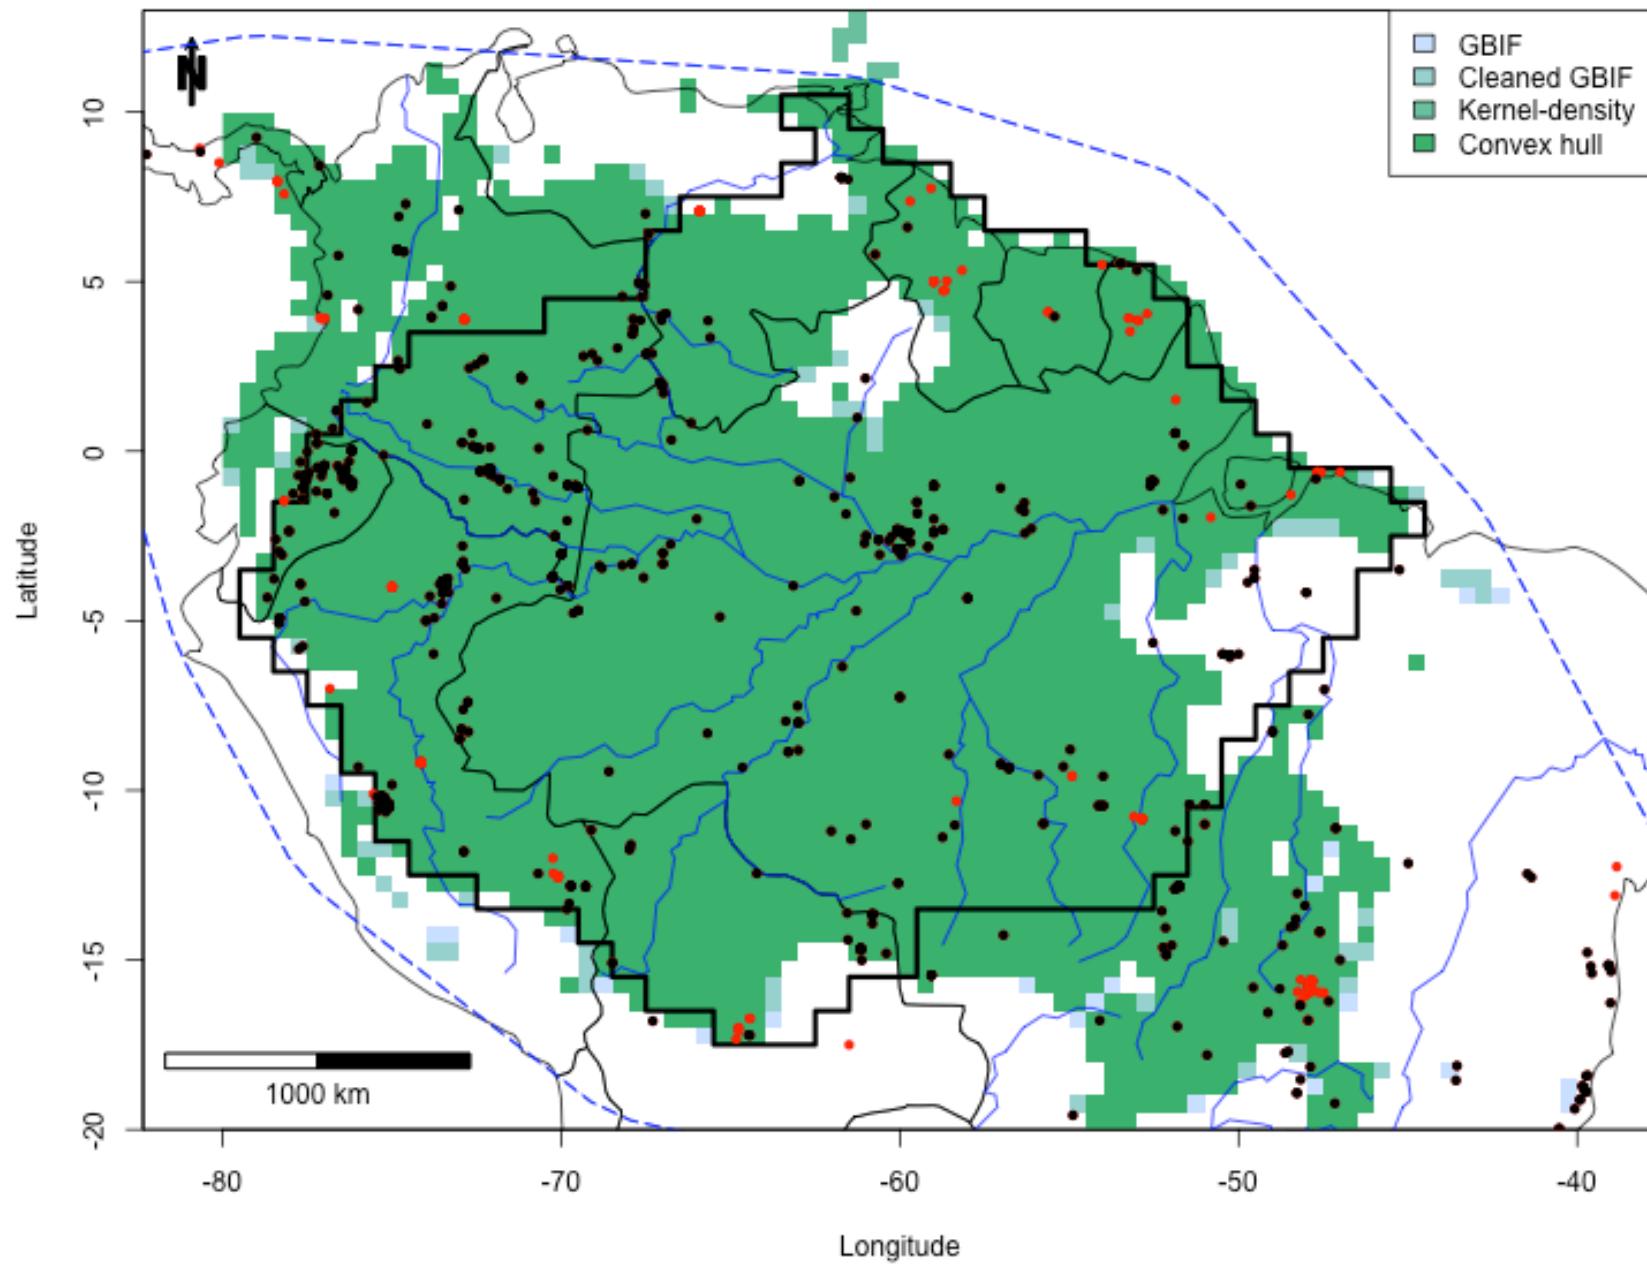

# Minquartia guianensis

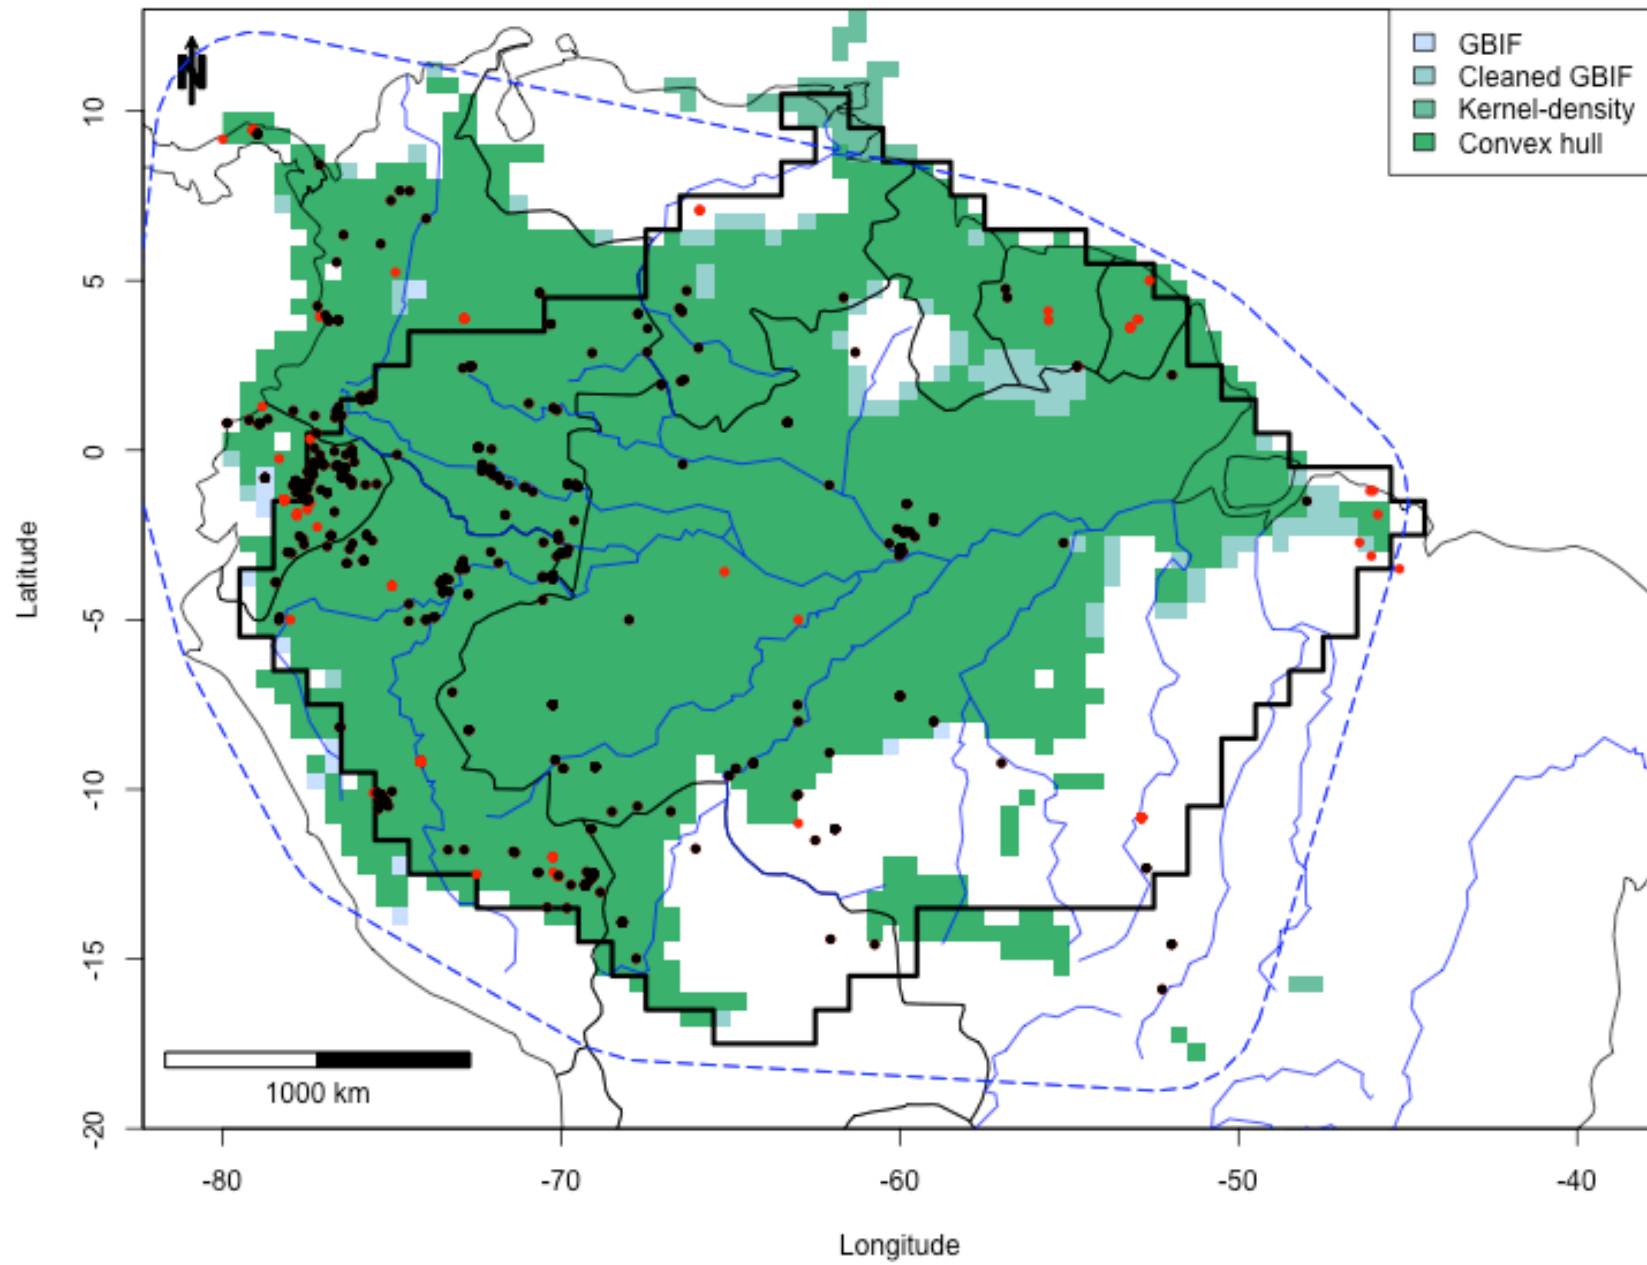

# Mollia gracilis

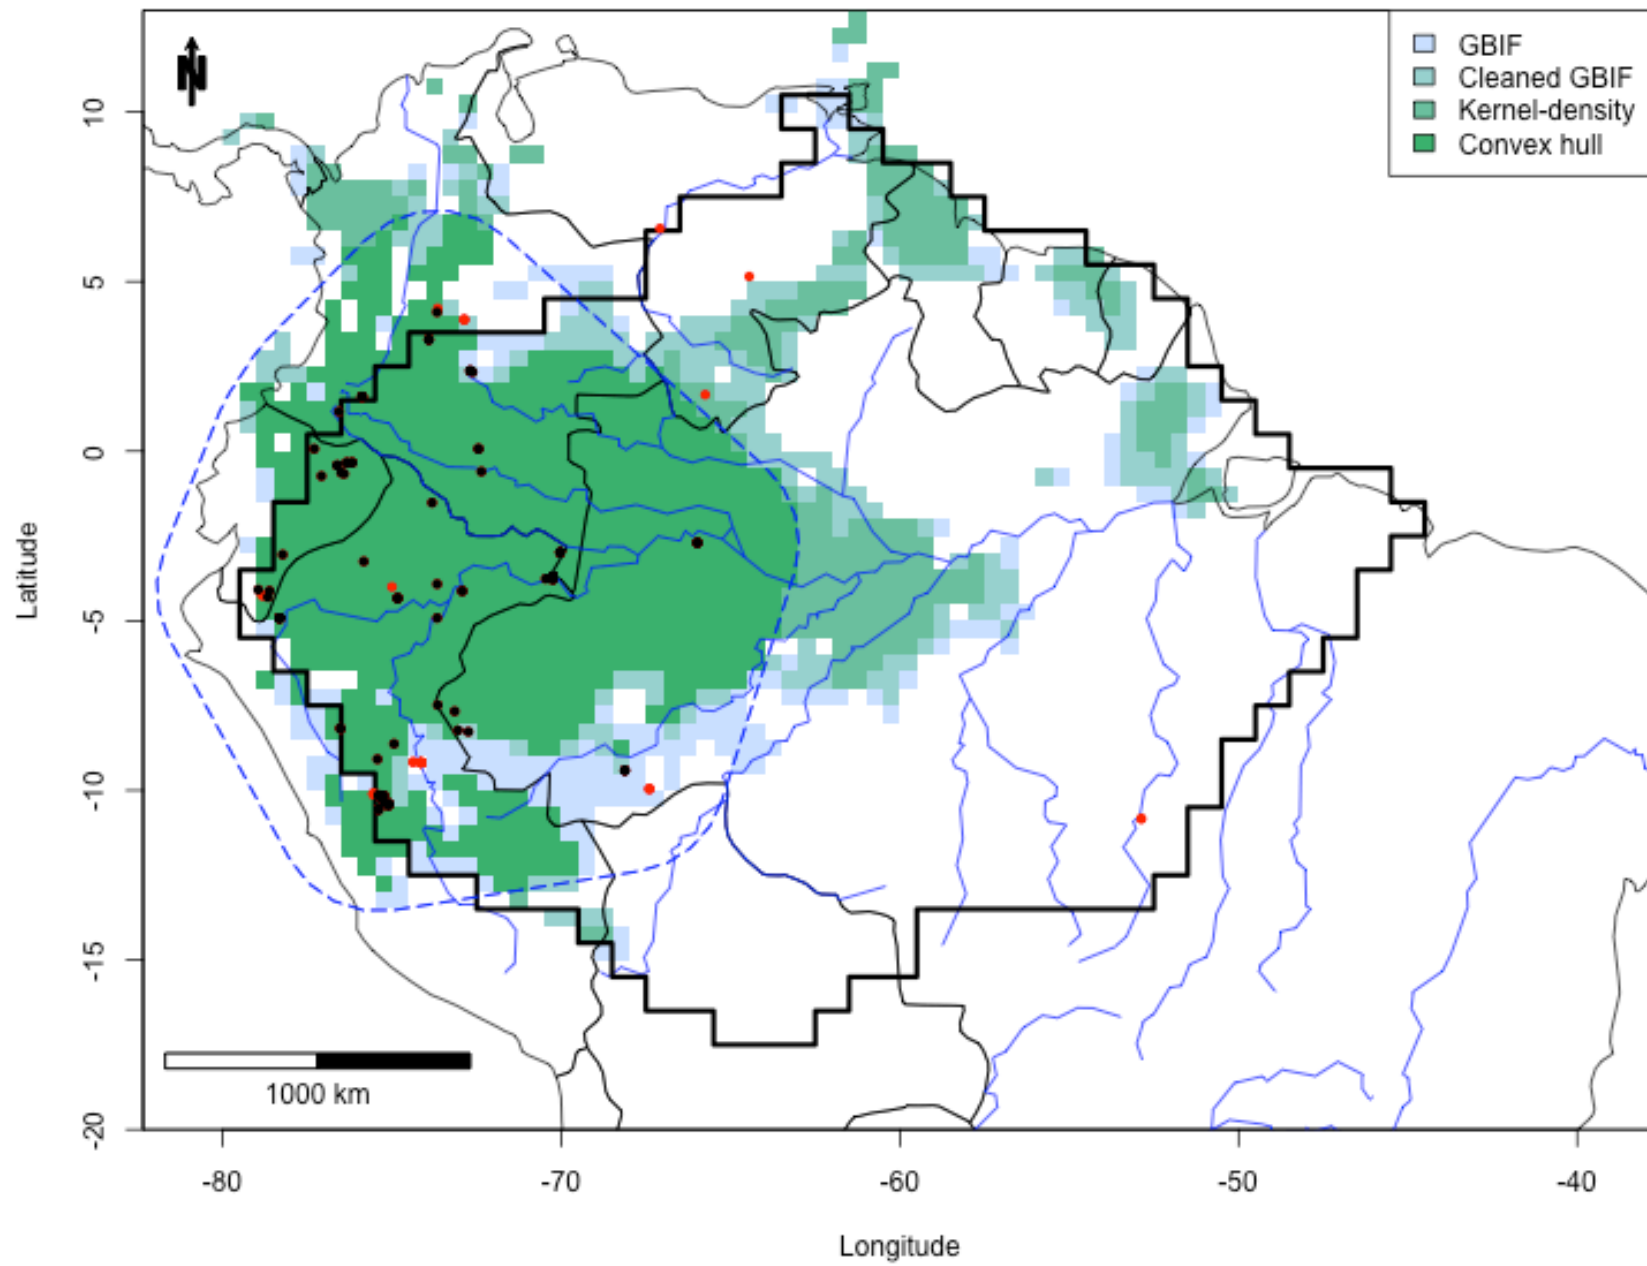

# Monopteryx uaucu

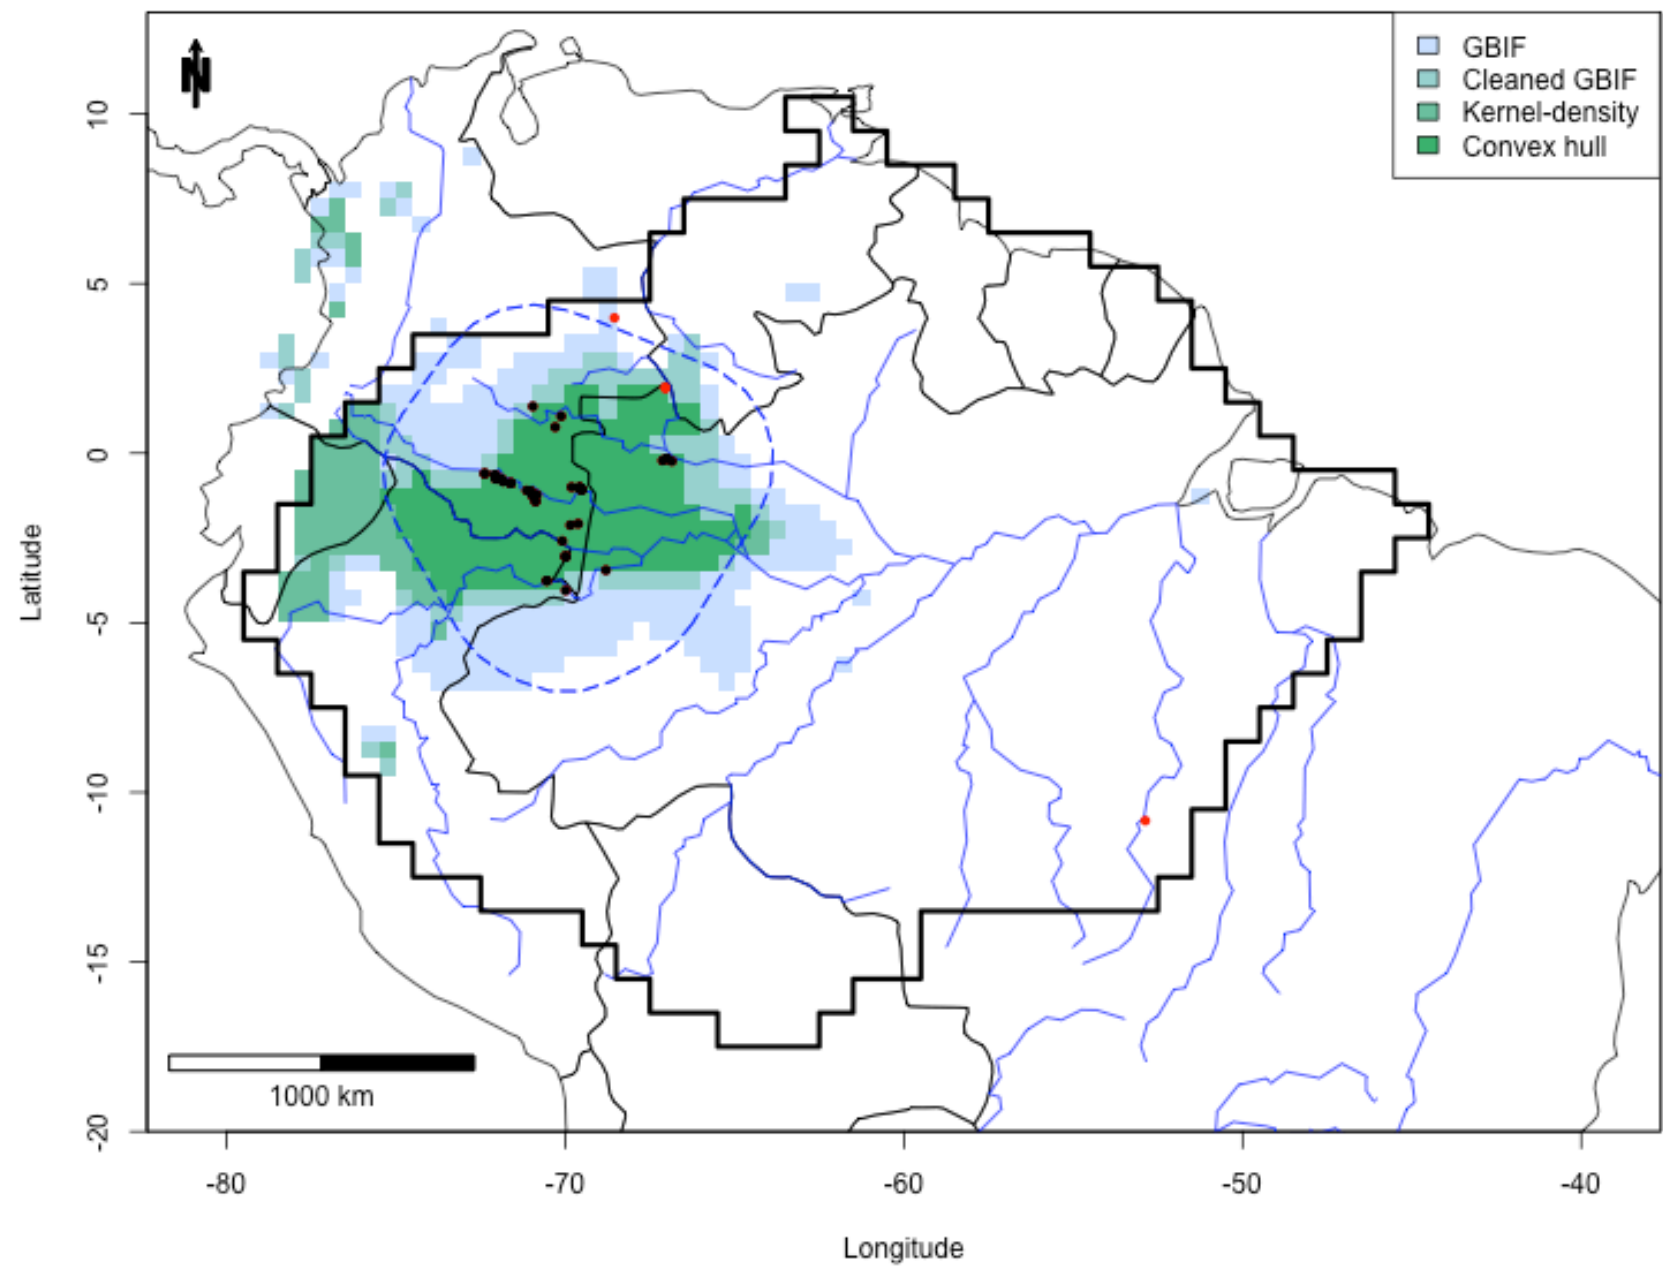

# Mora excelsa

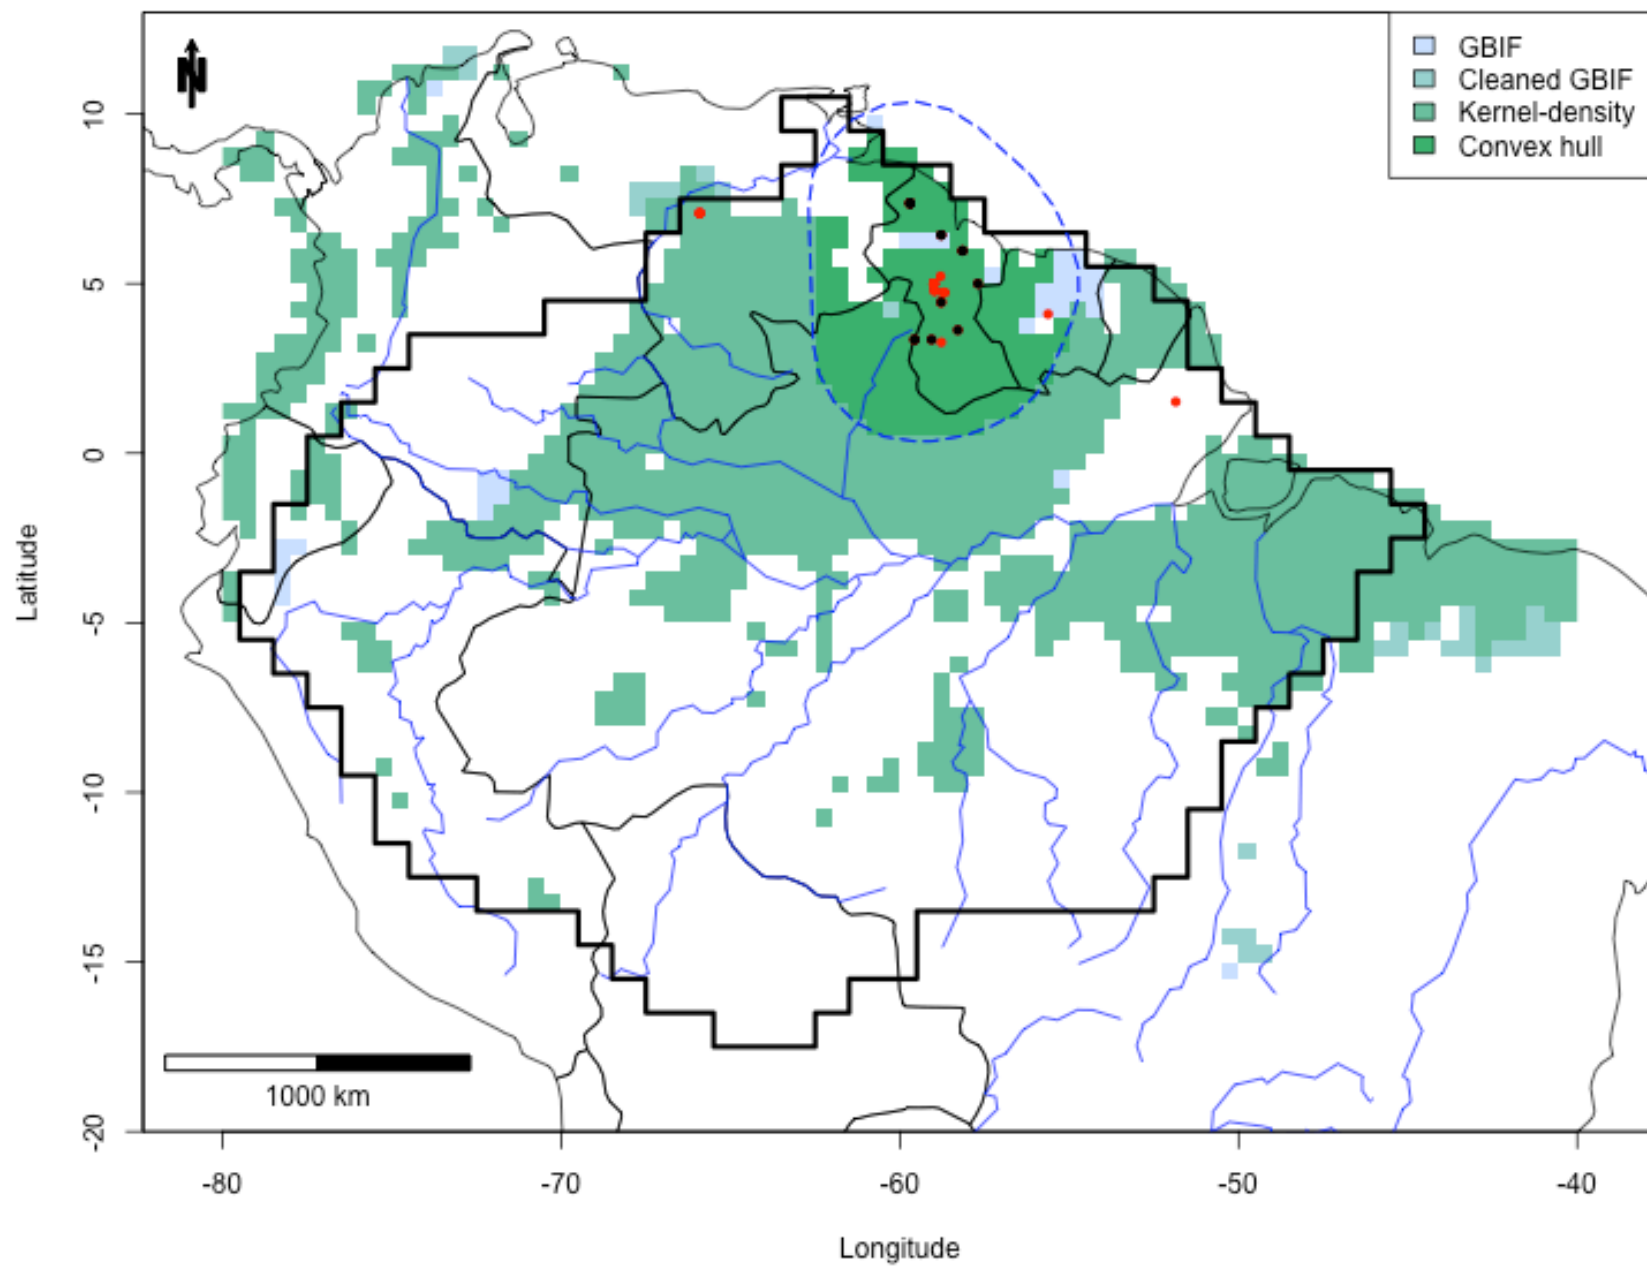



# Mora gonggripii

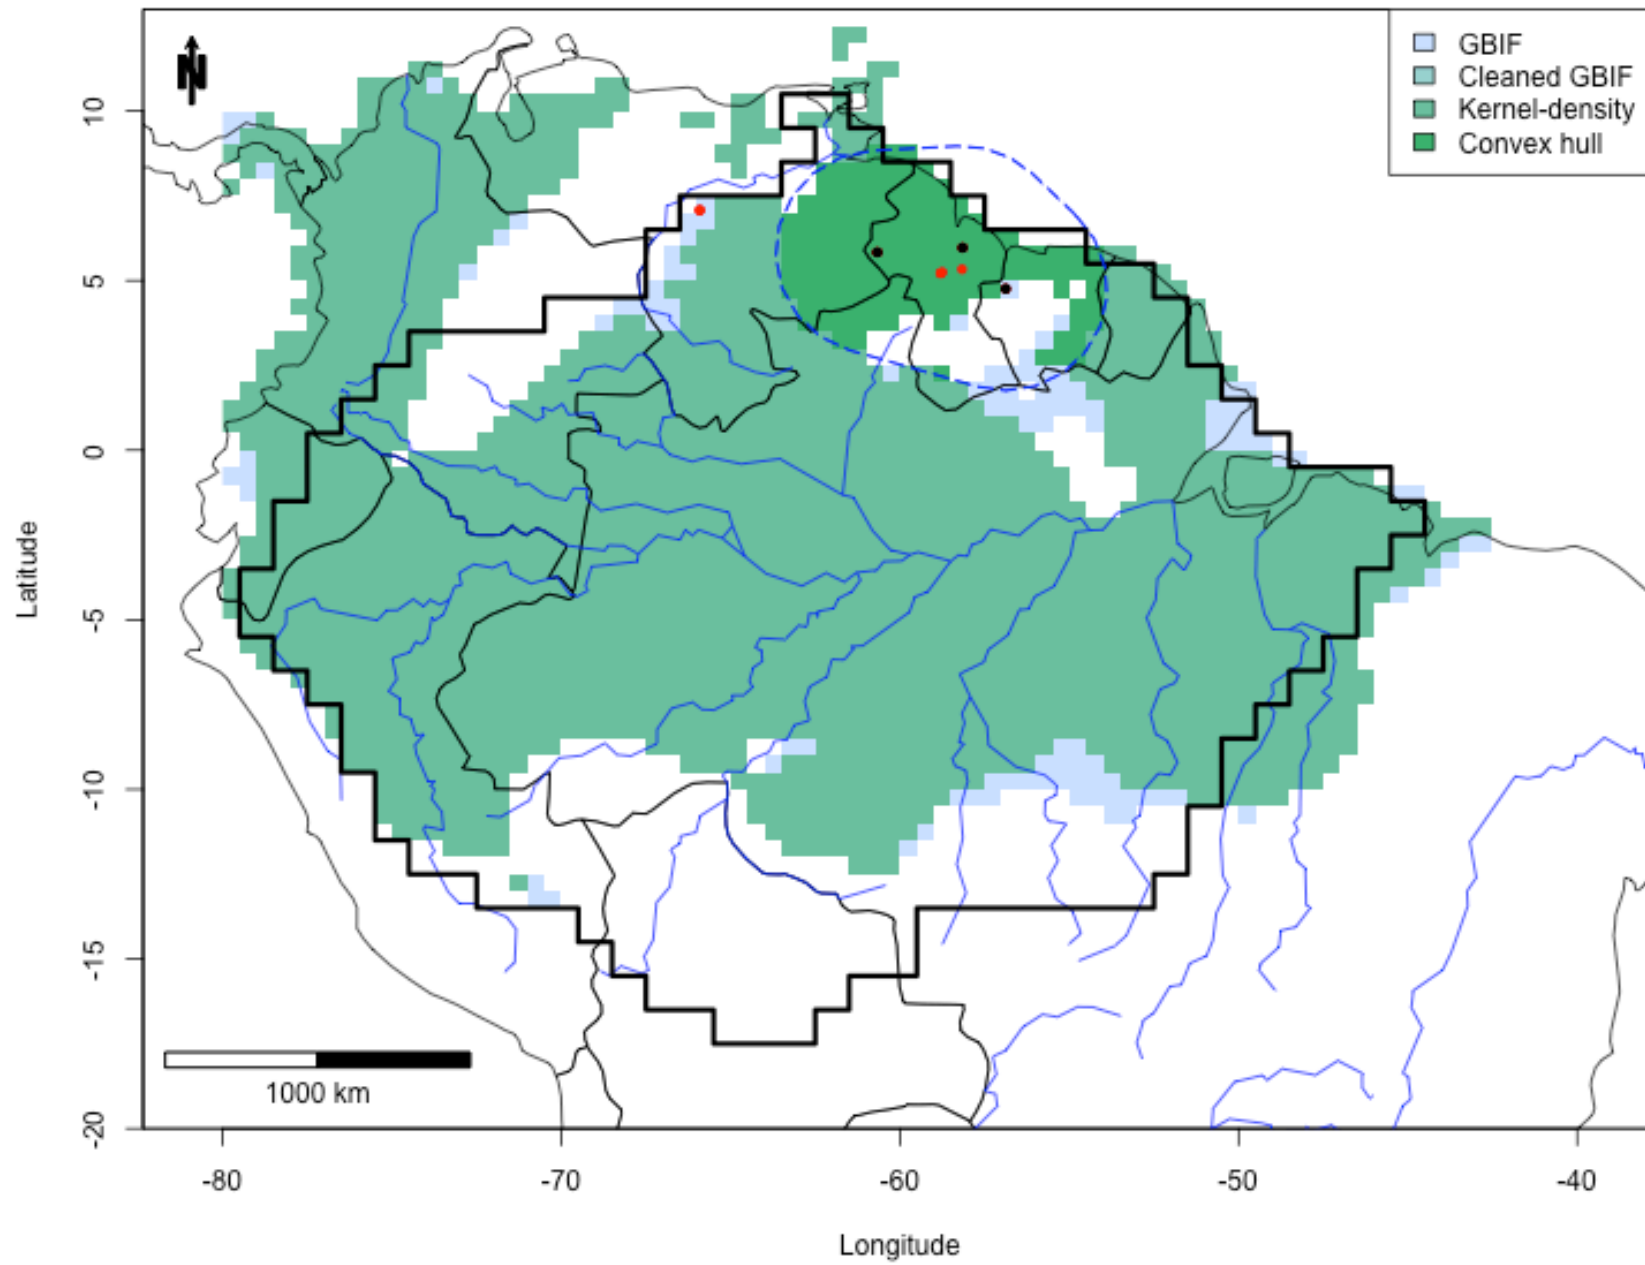

# Ocotea aciphylla

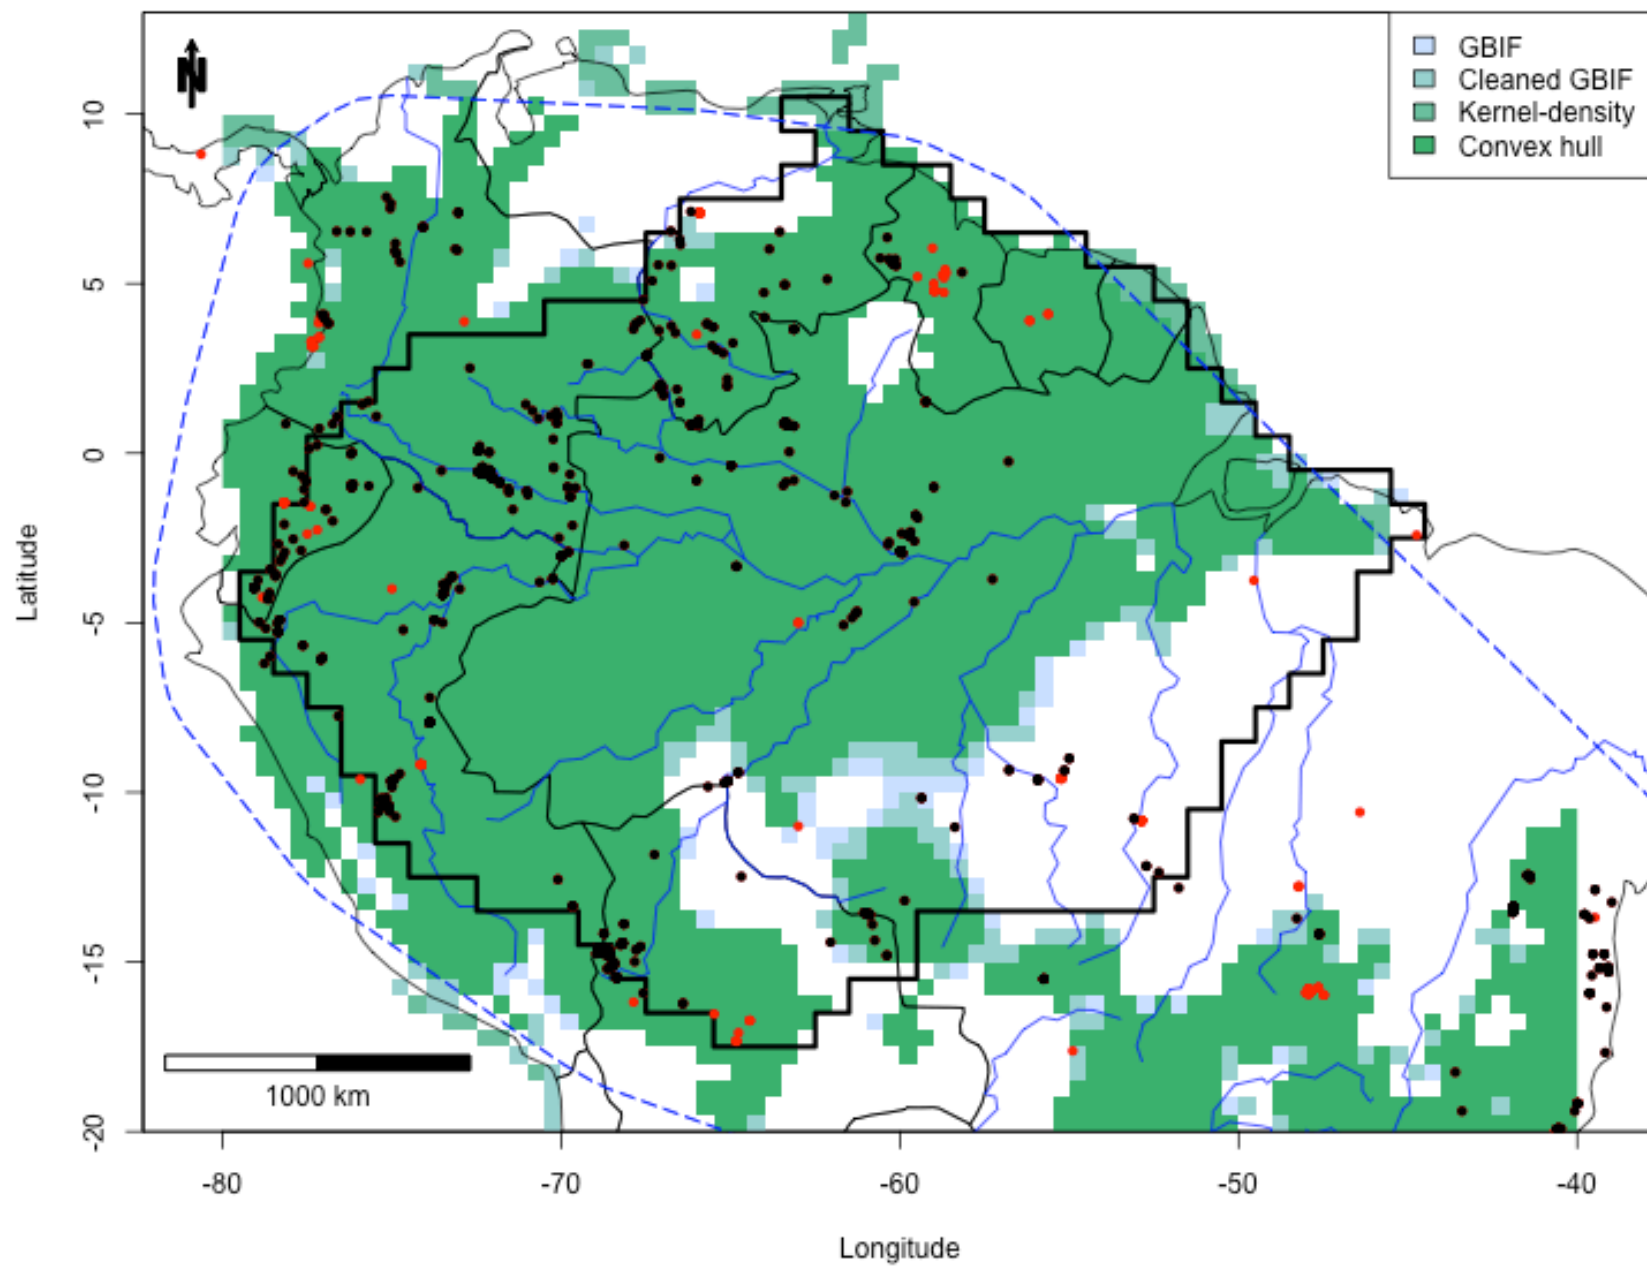

# Ocotea cernua

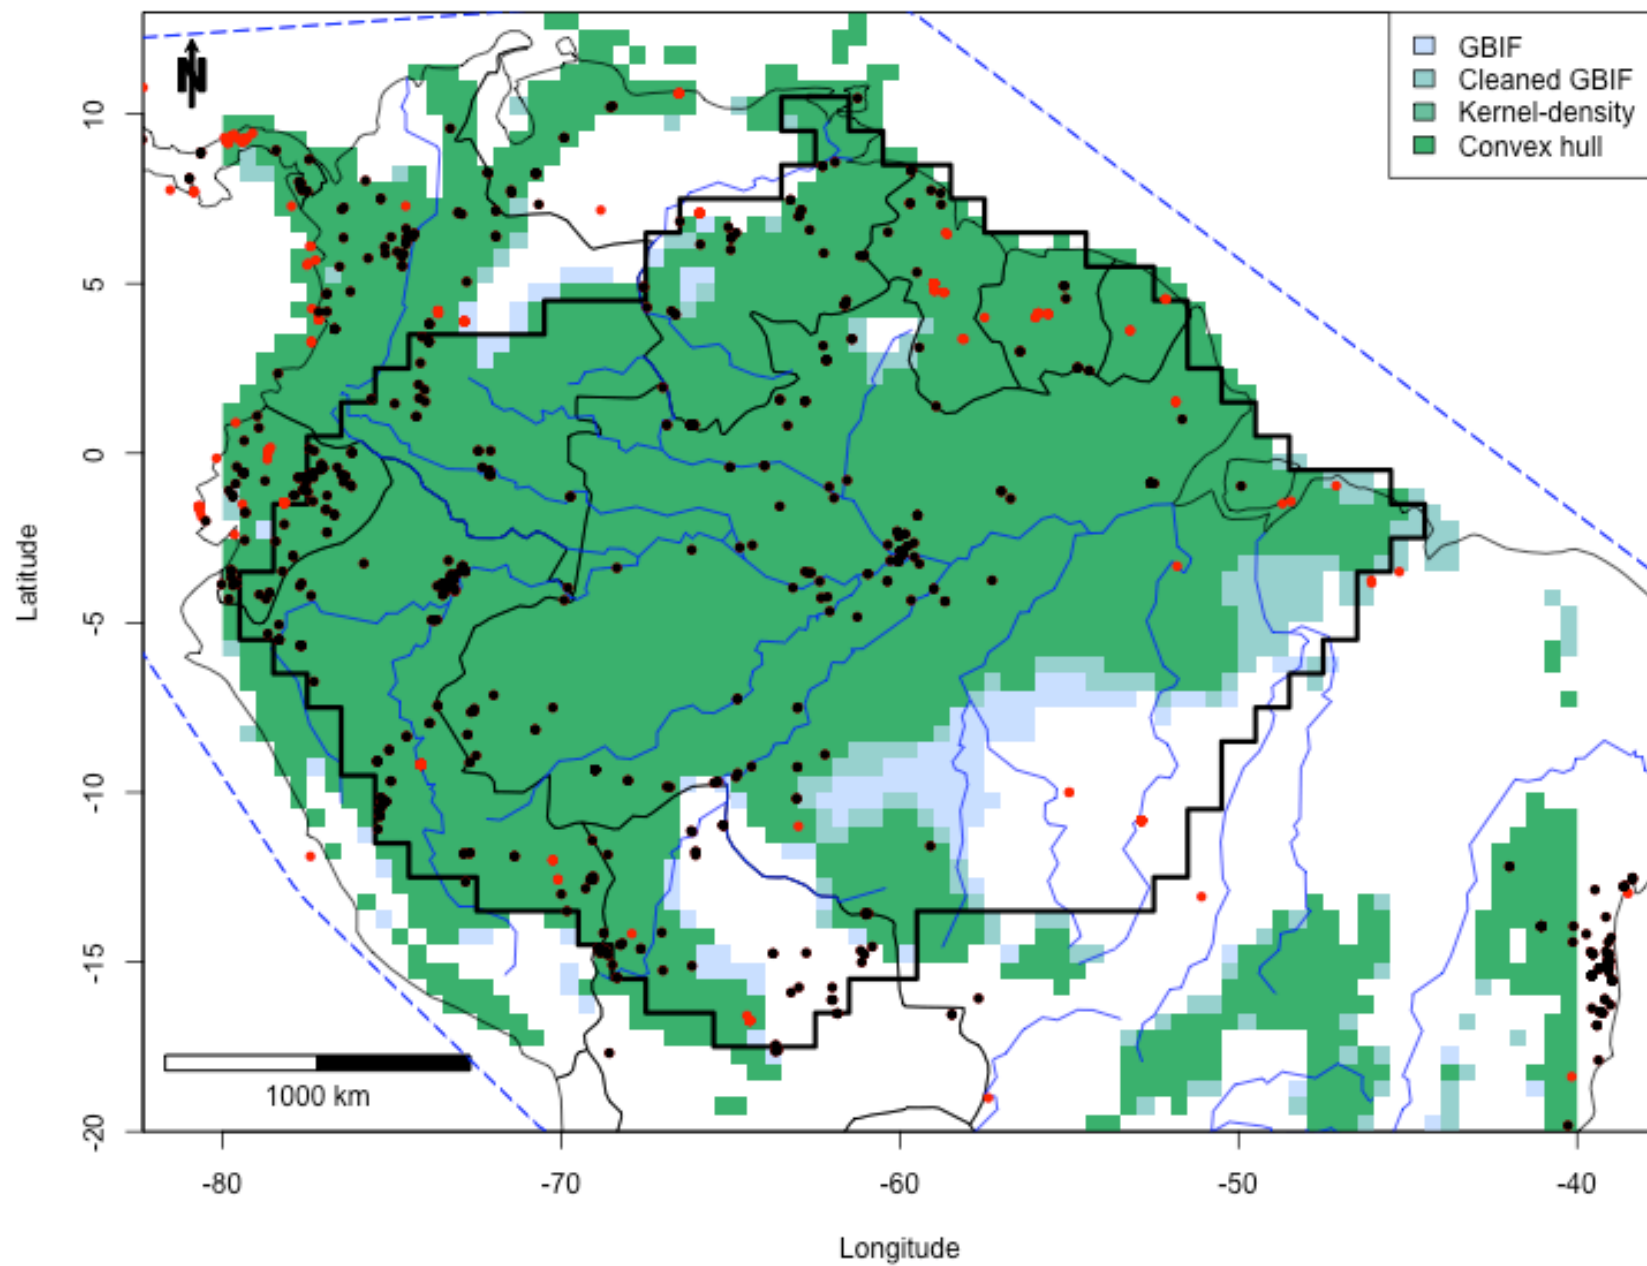

# Oenocarpus bacaba

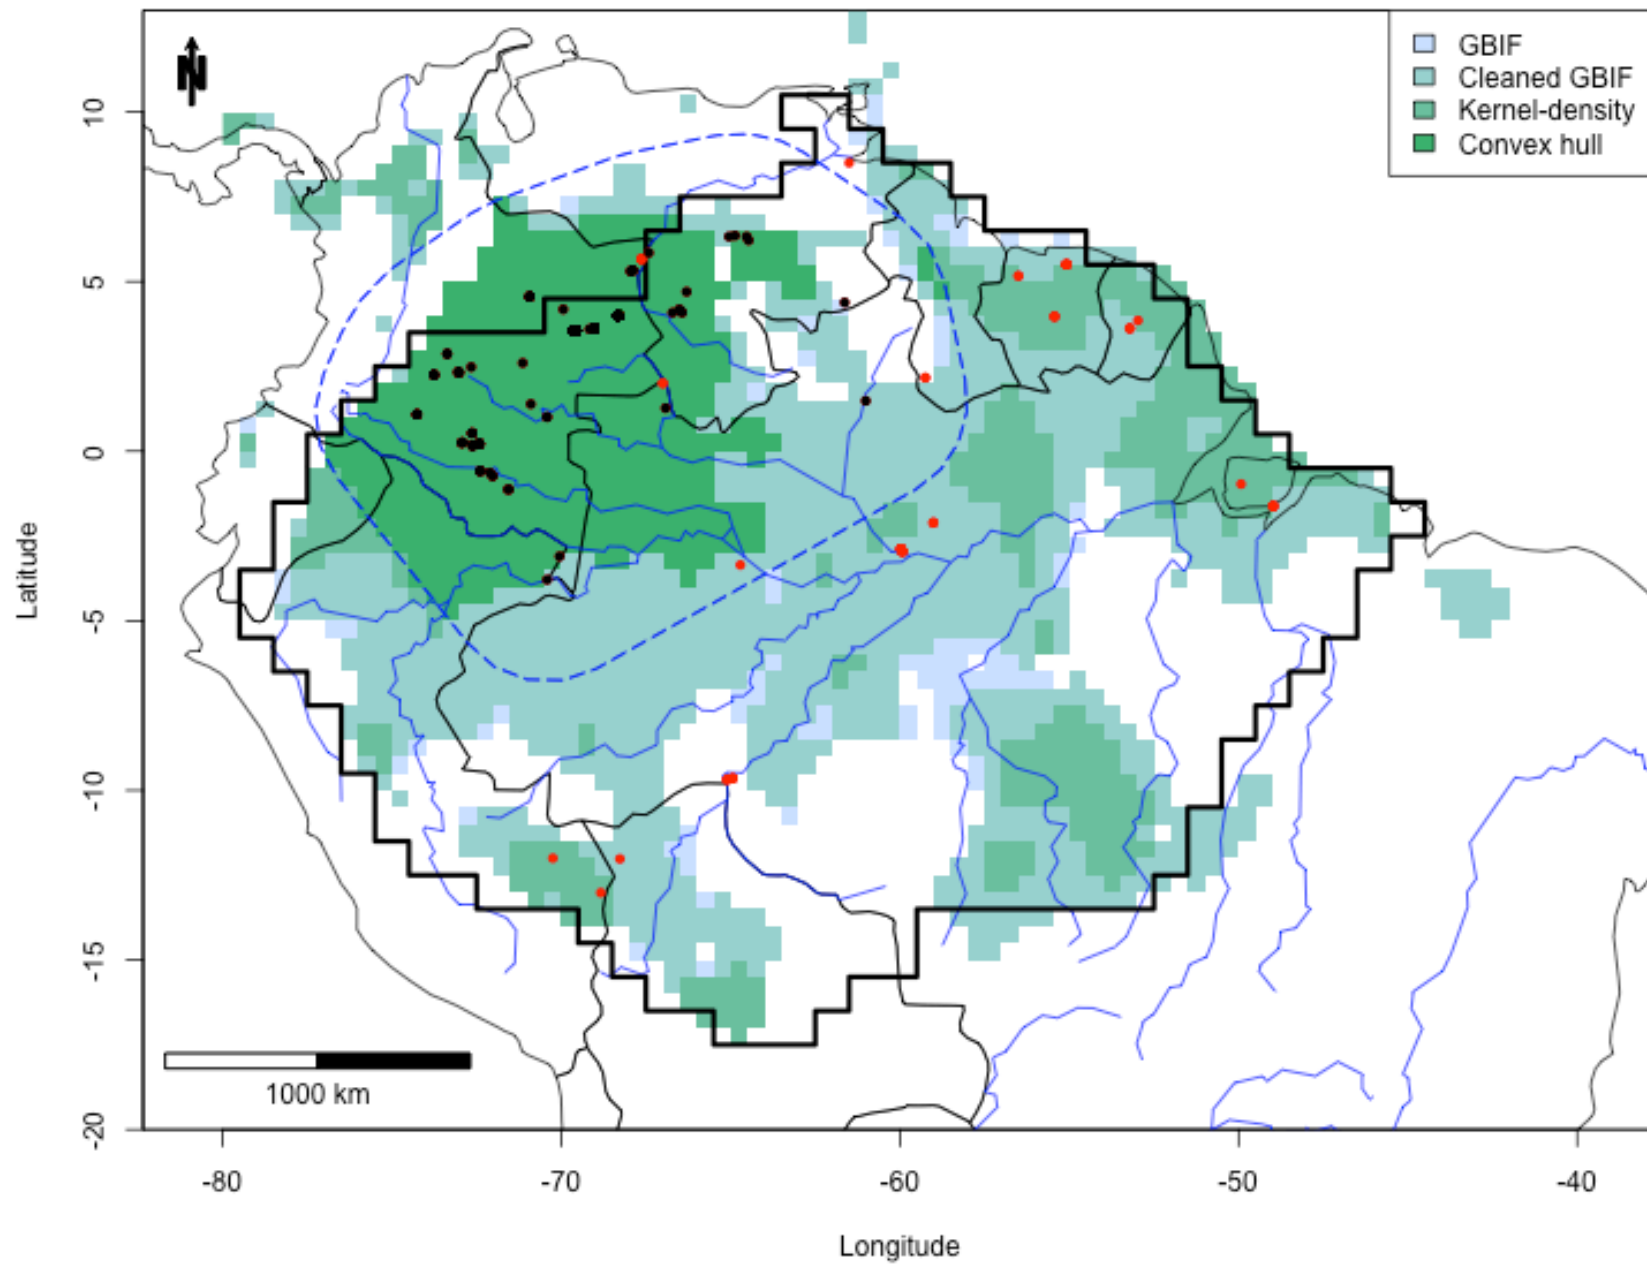

# Oenocarpus bataua

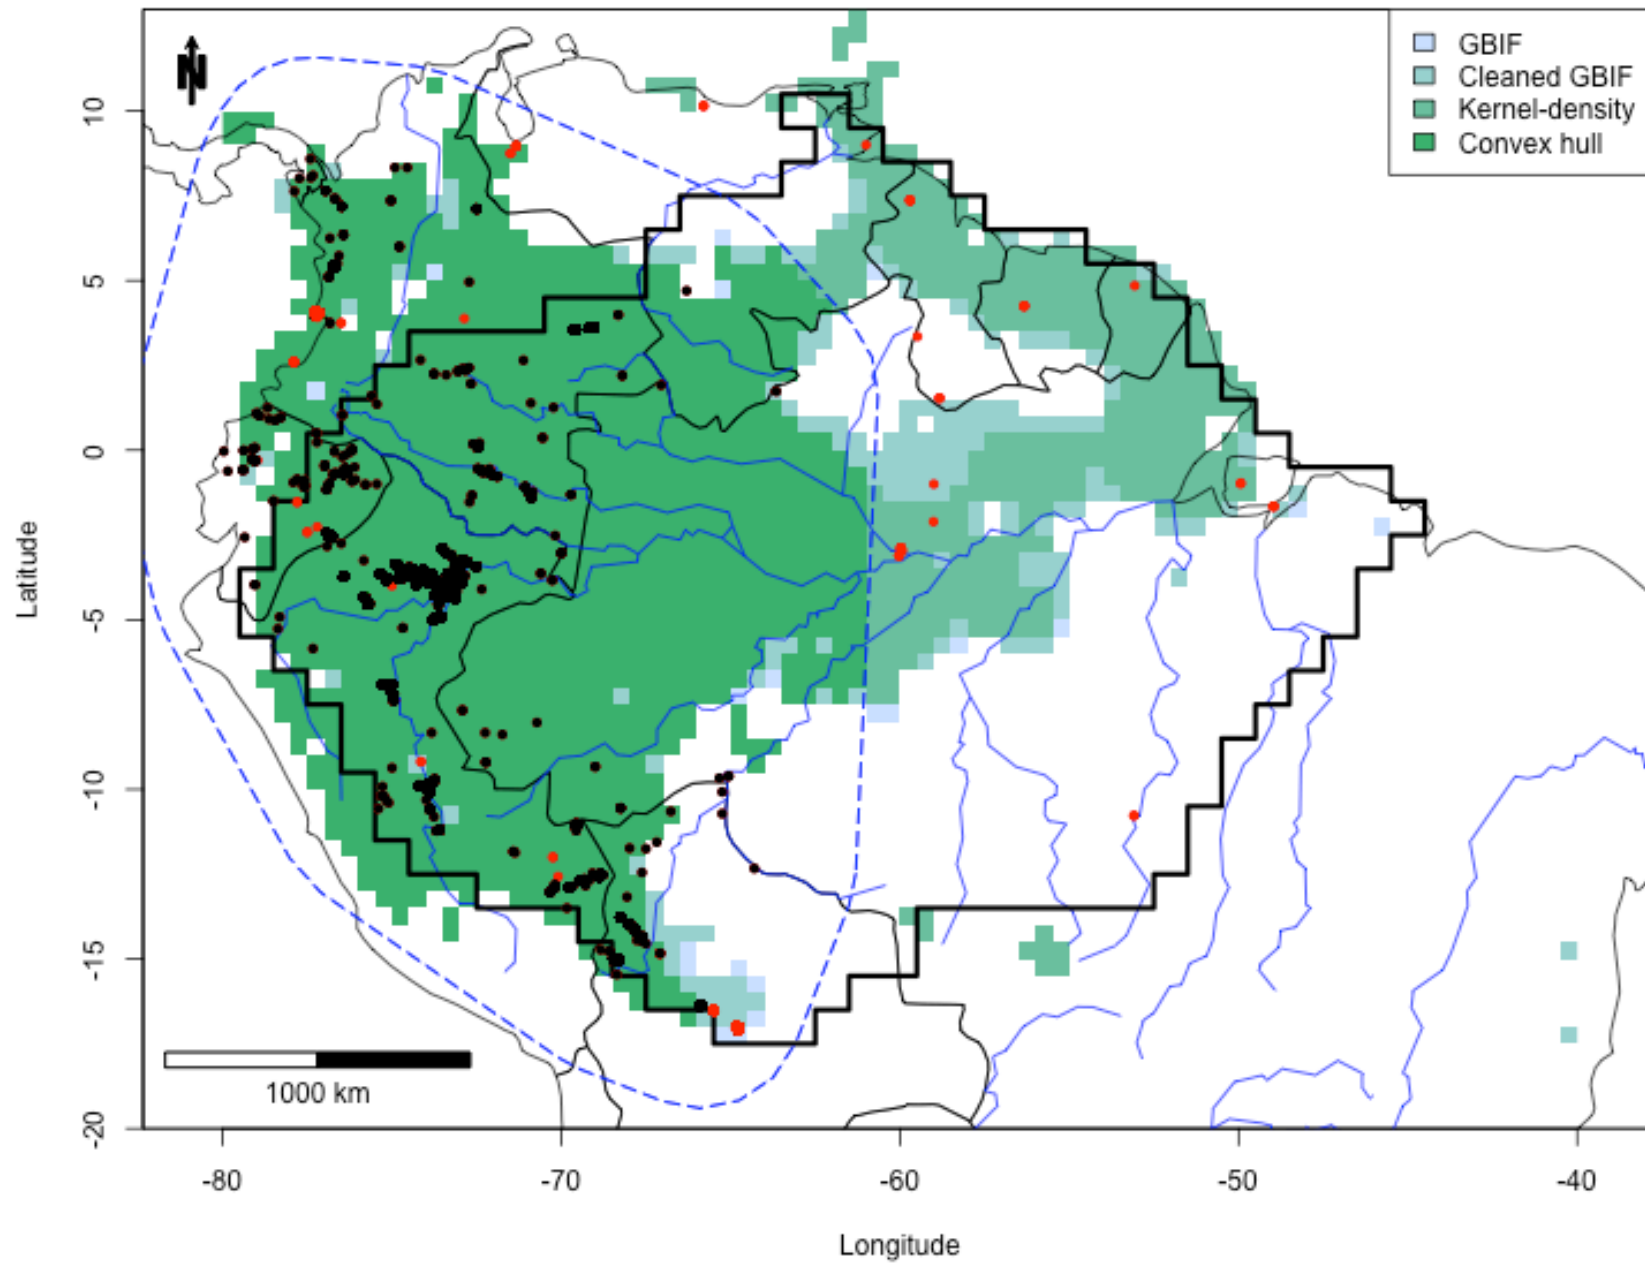

# Osteophloeum platyspermum

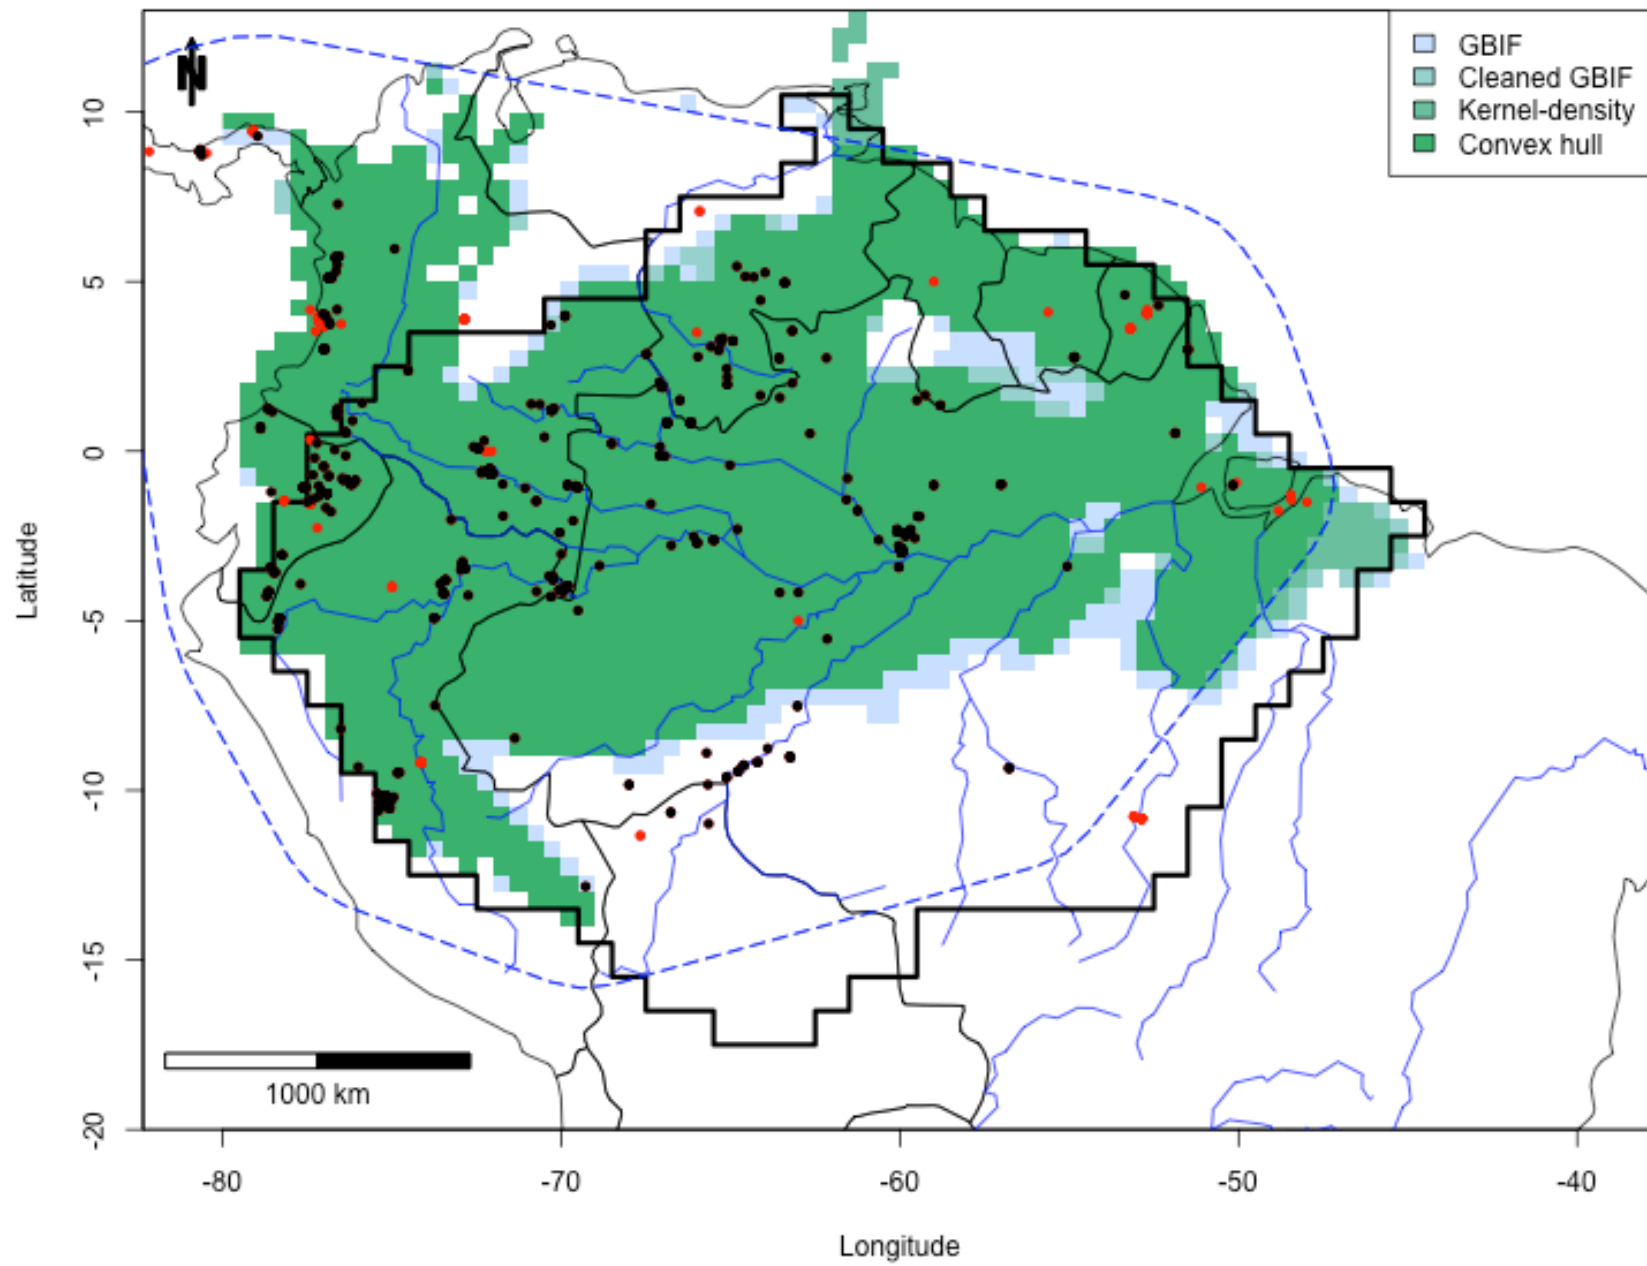

# Otoba parvifolia

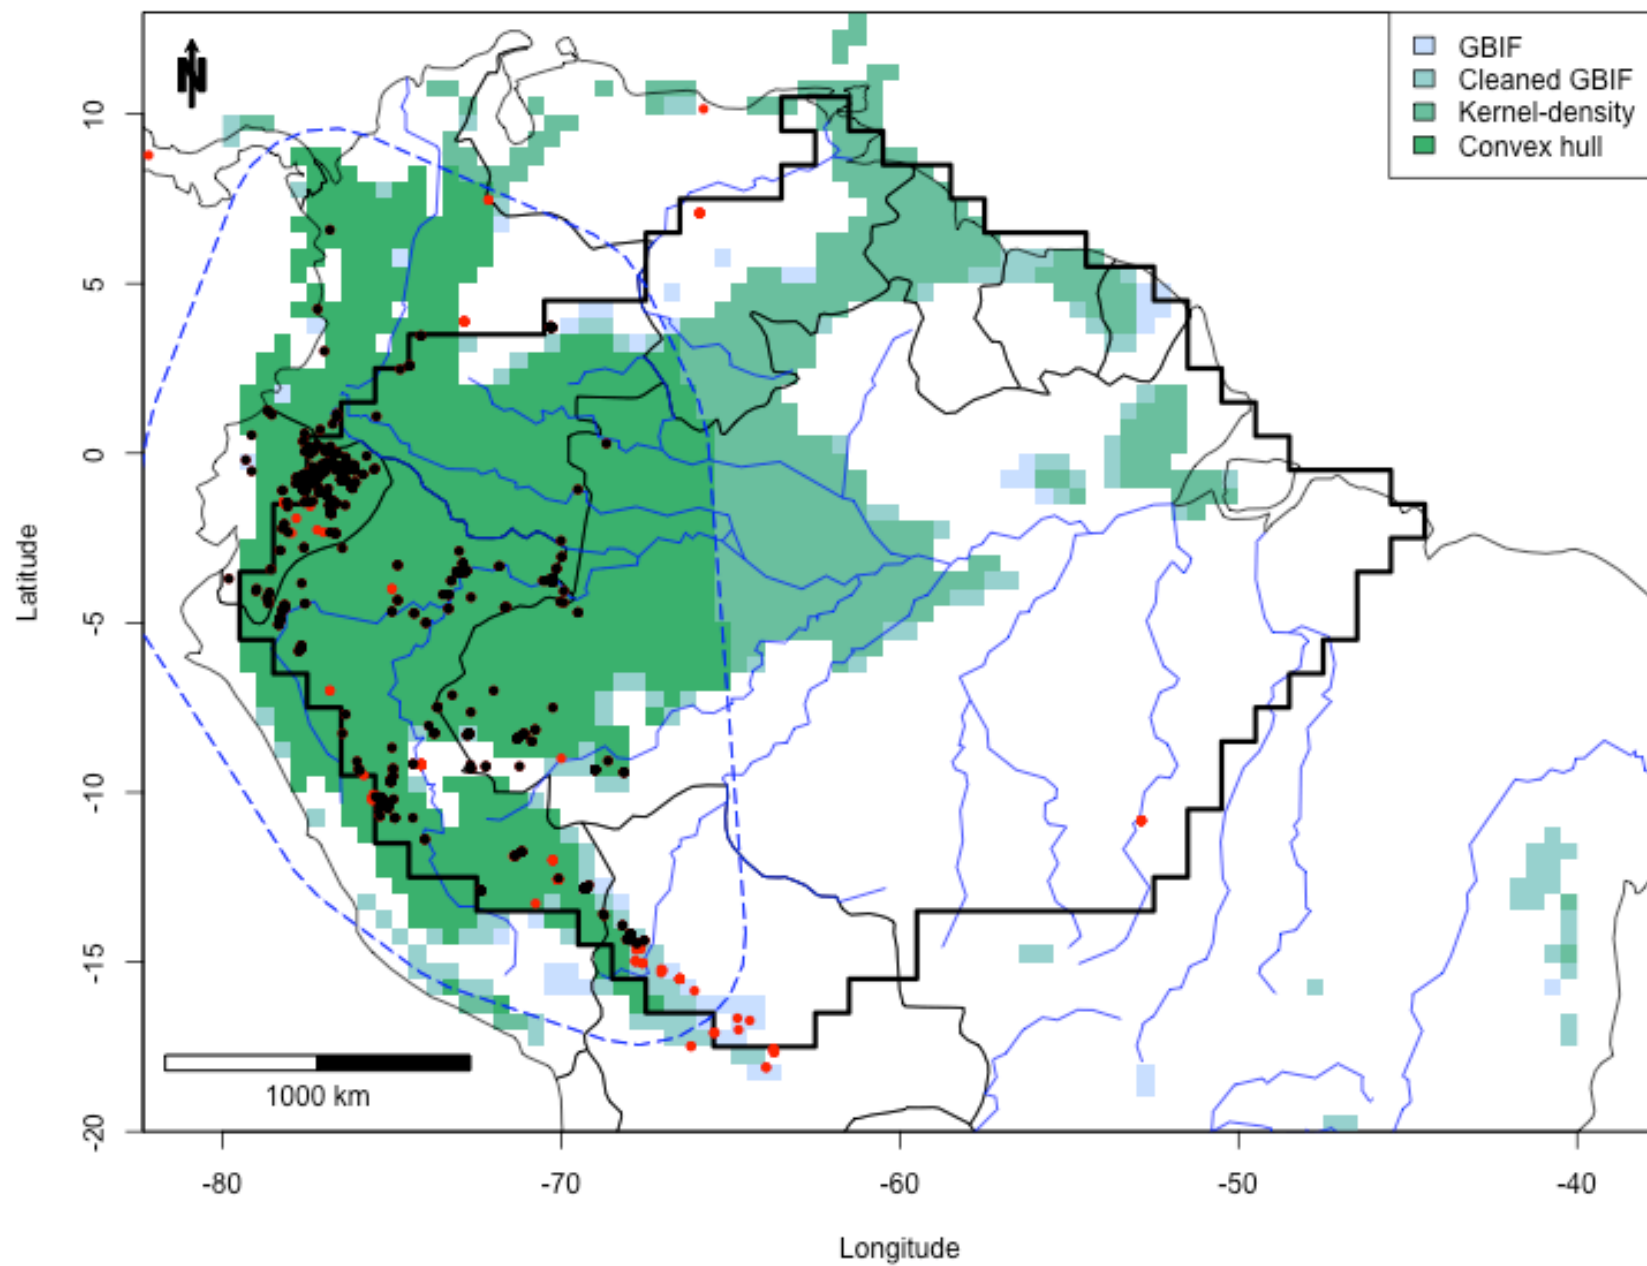



# Oxandra polyantha

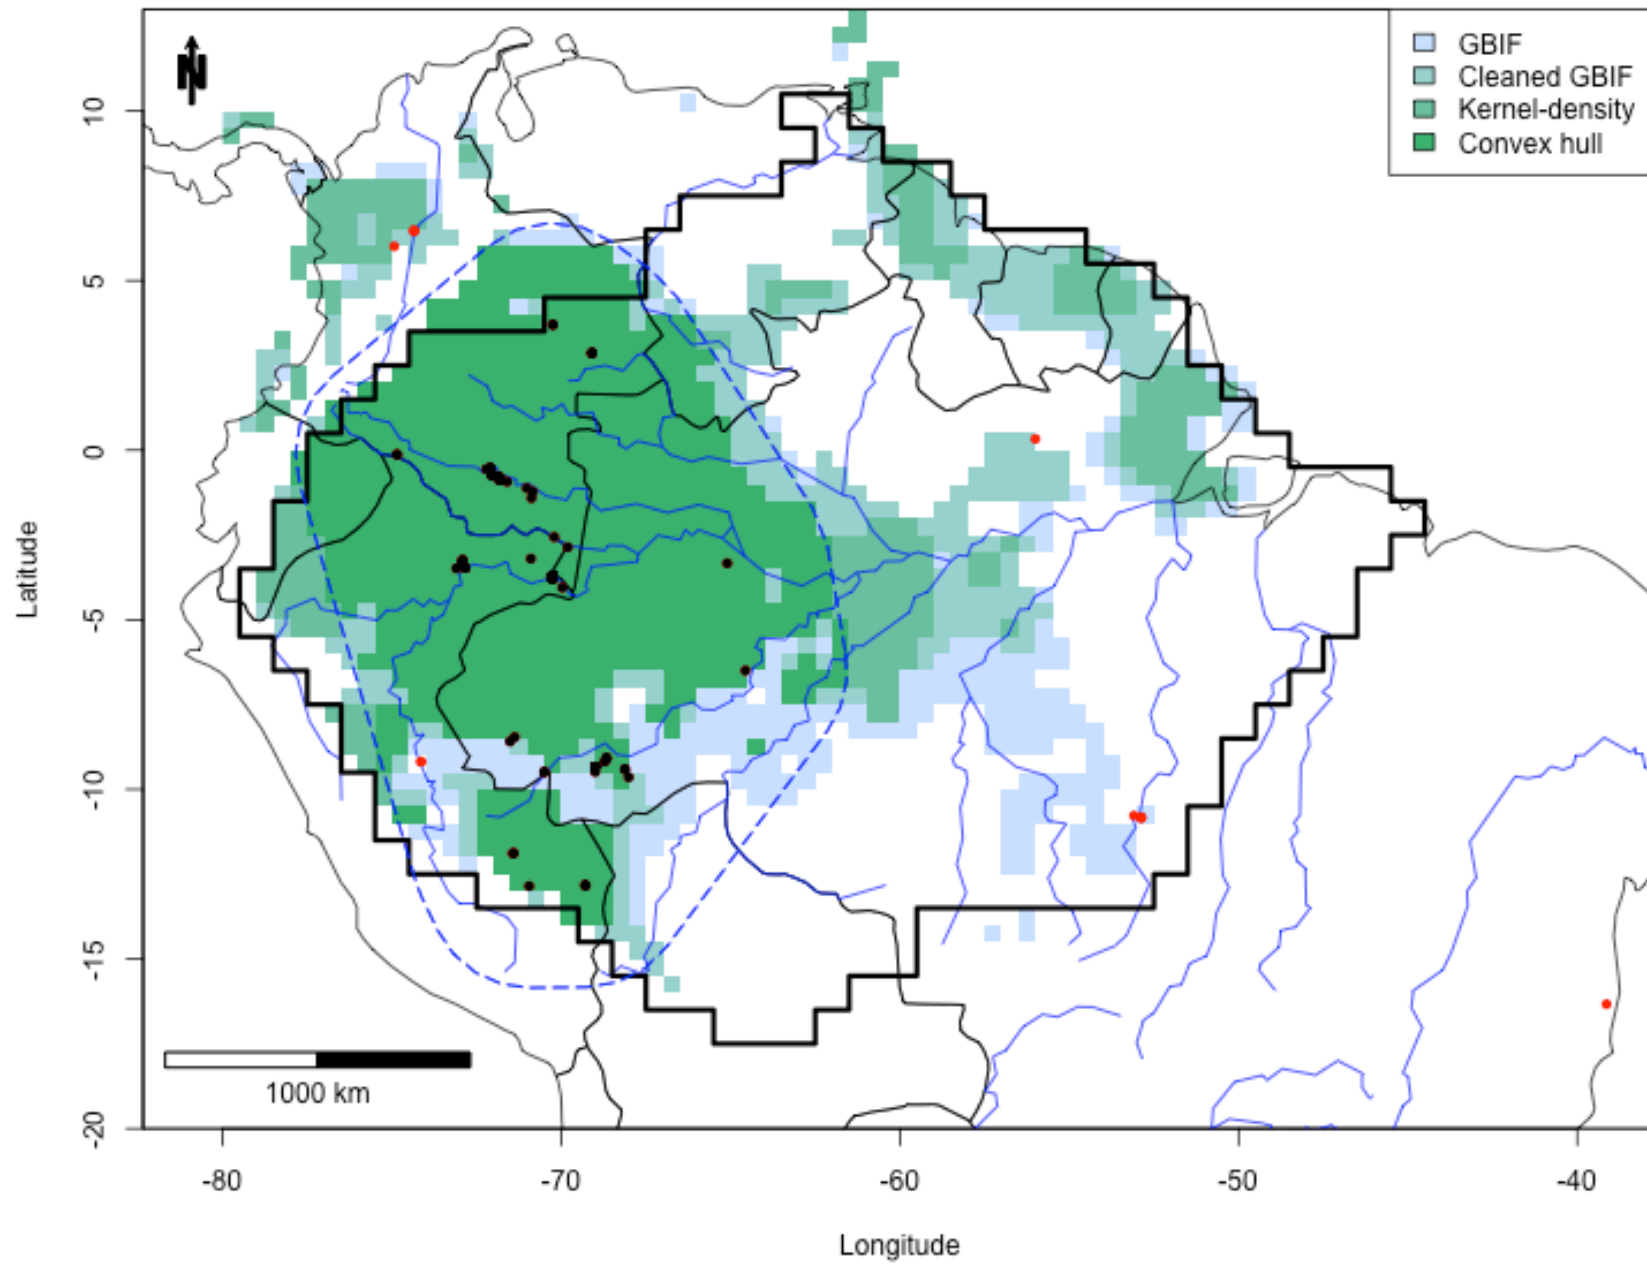

# Pachira brevipes

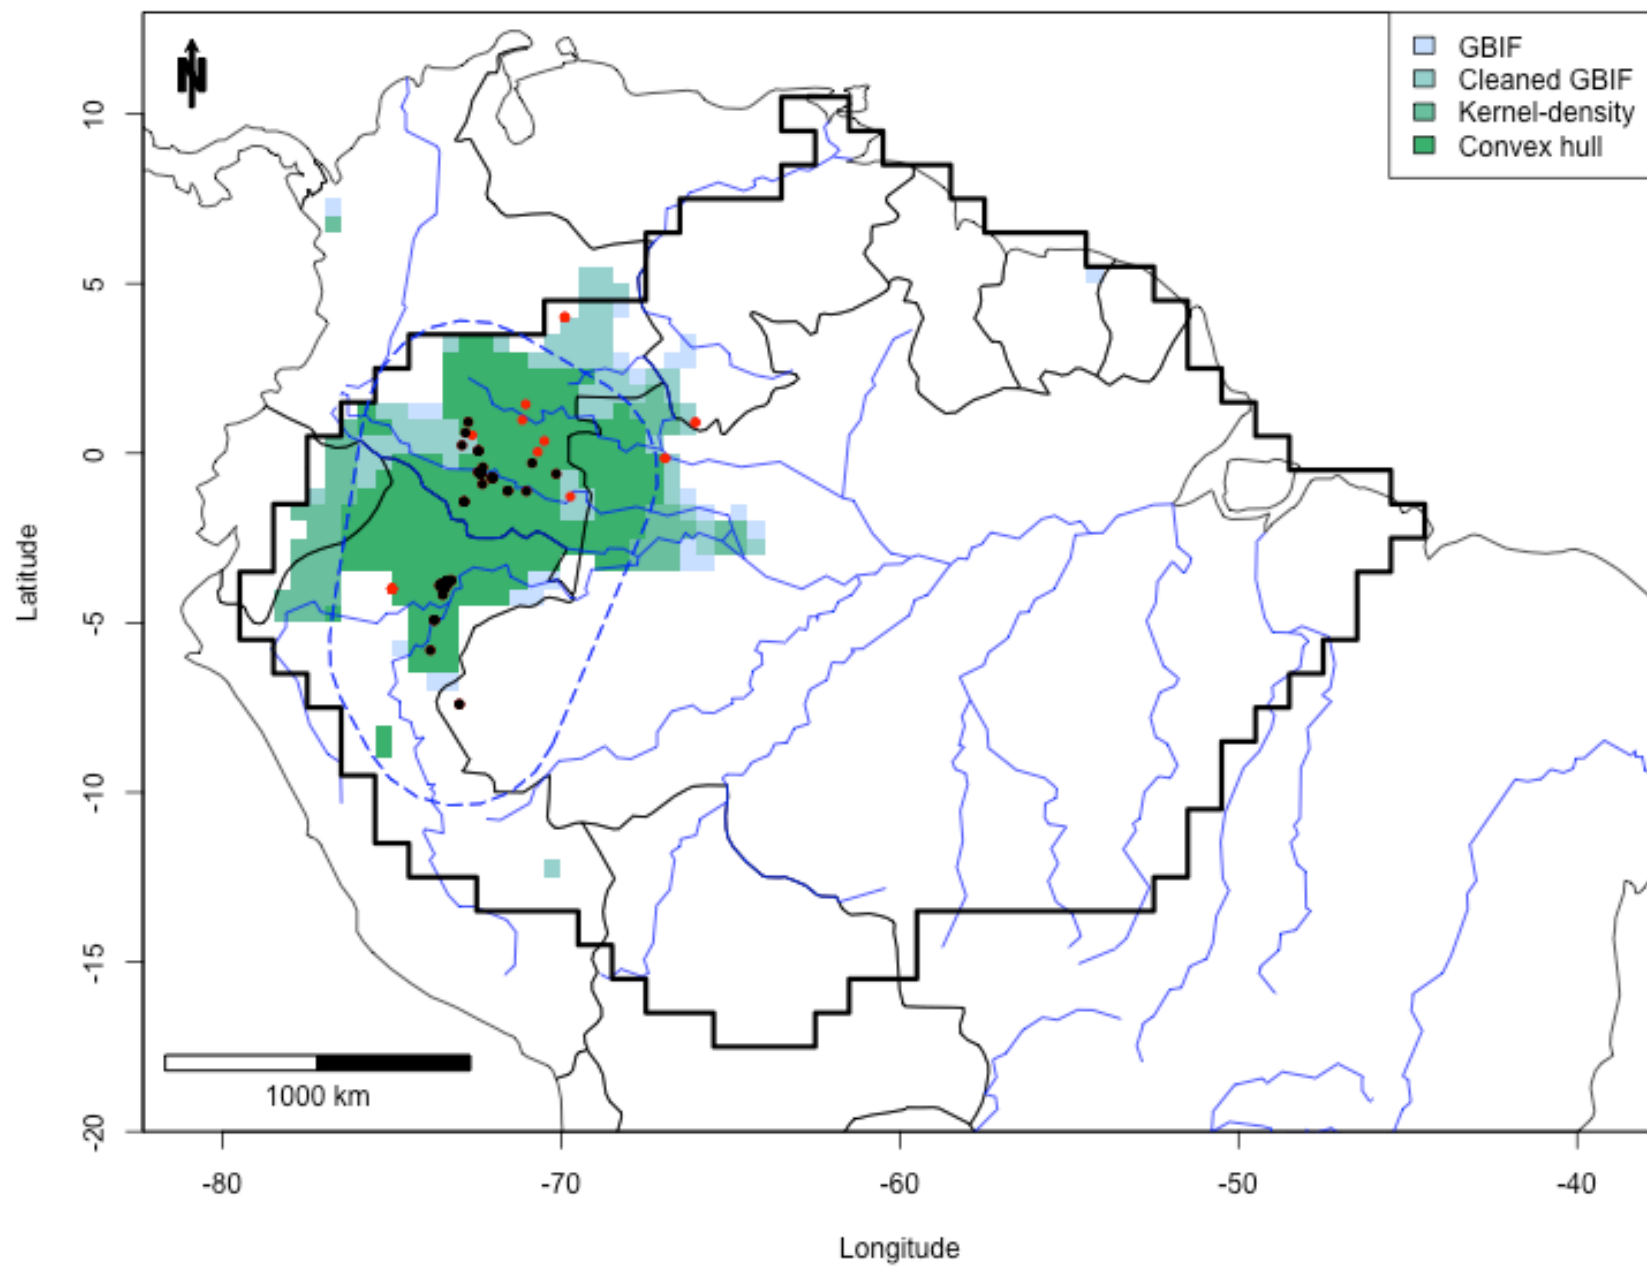

# Pentaclethra macroloba

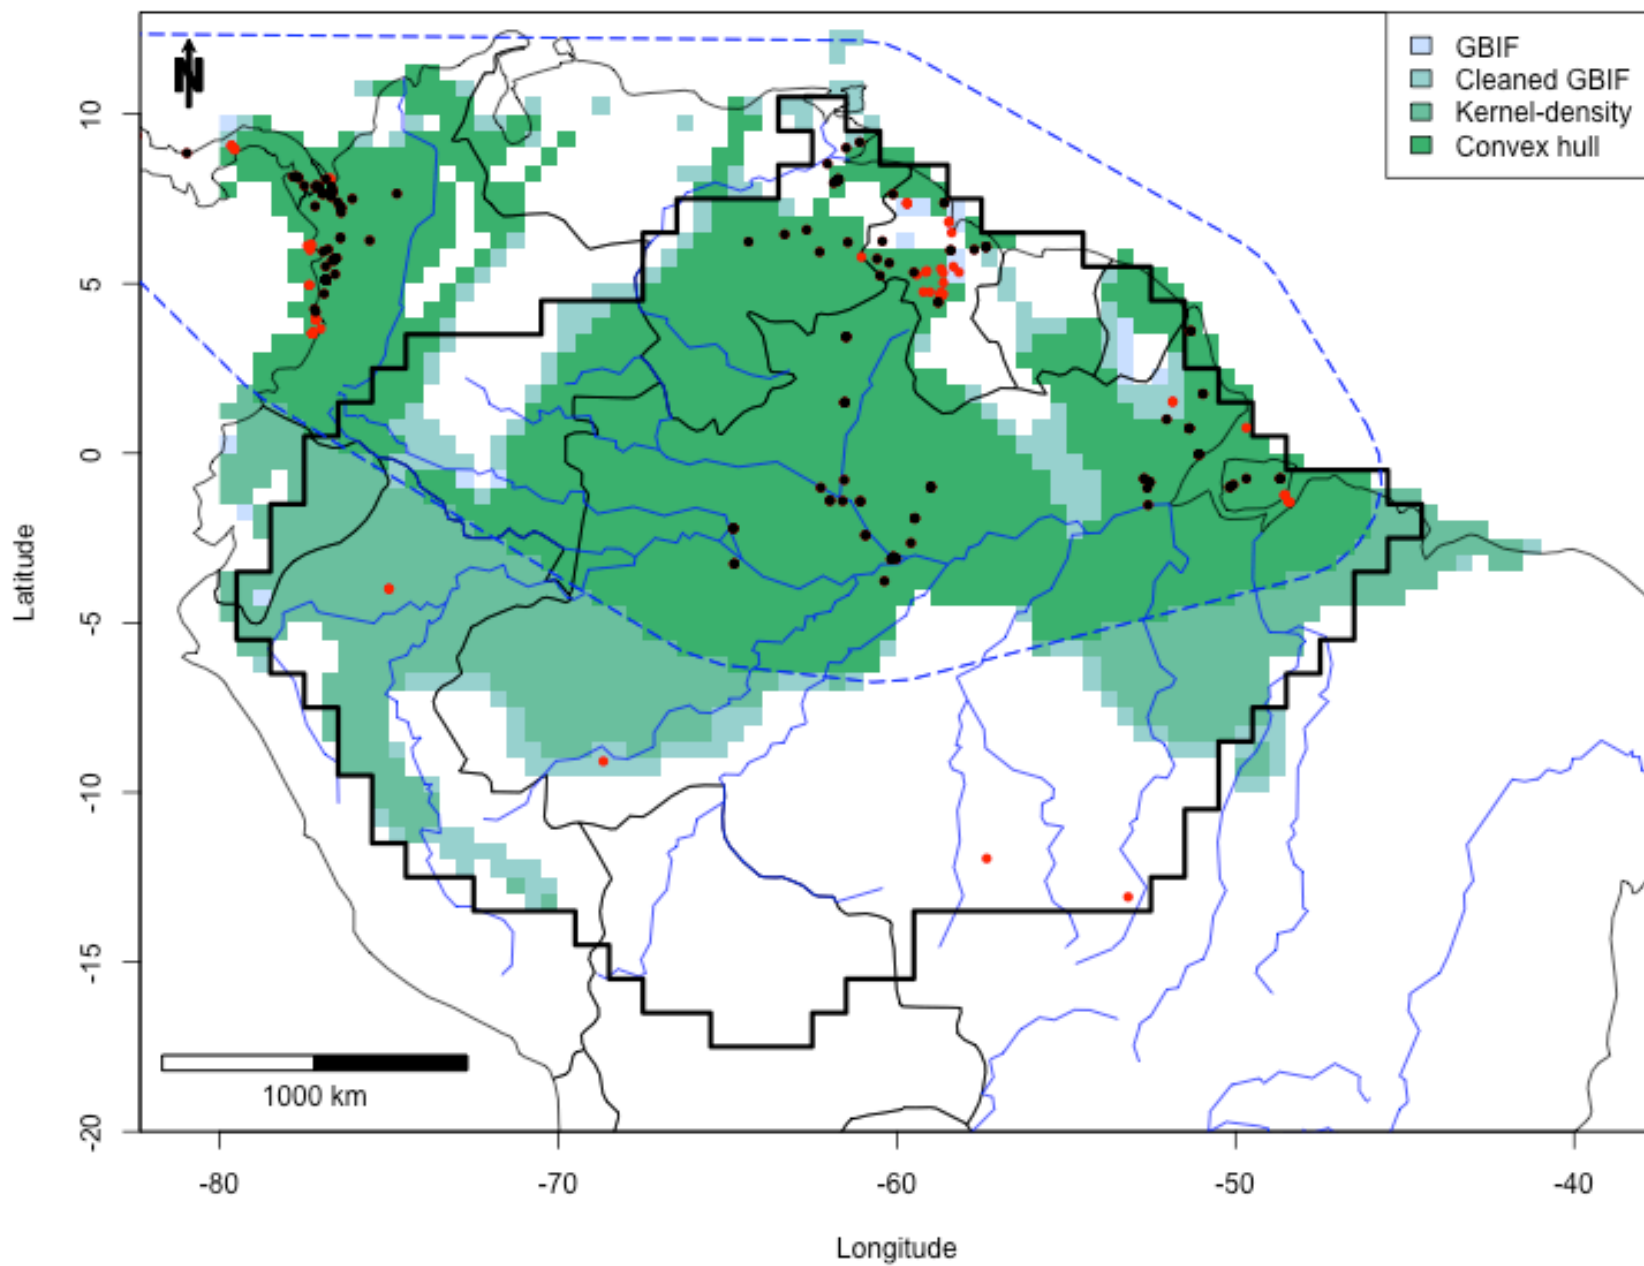

# Poulsenia armata

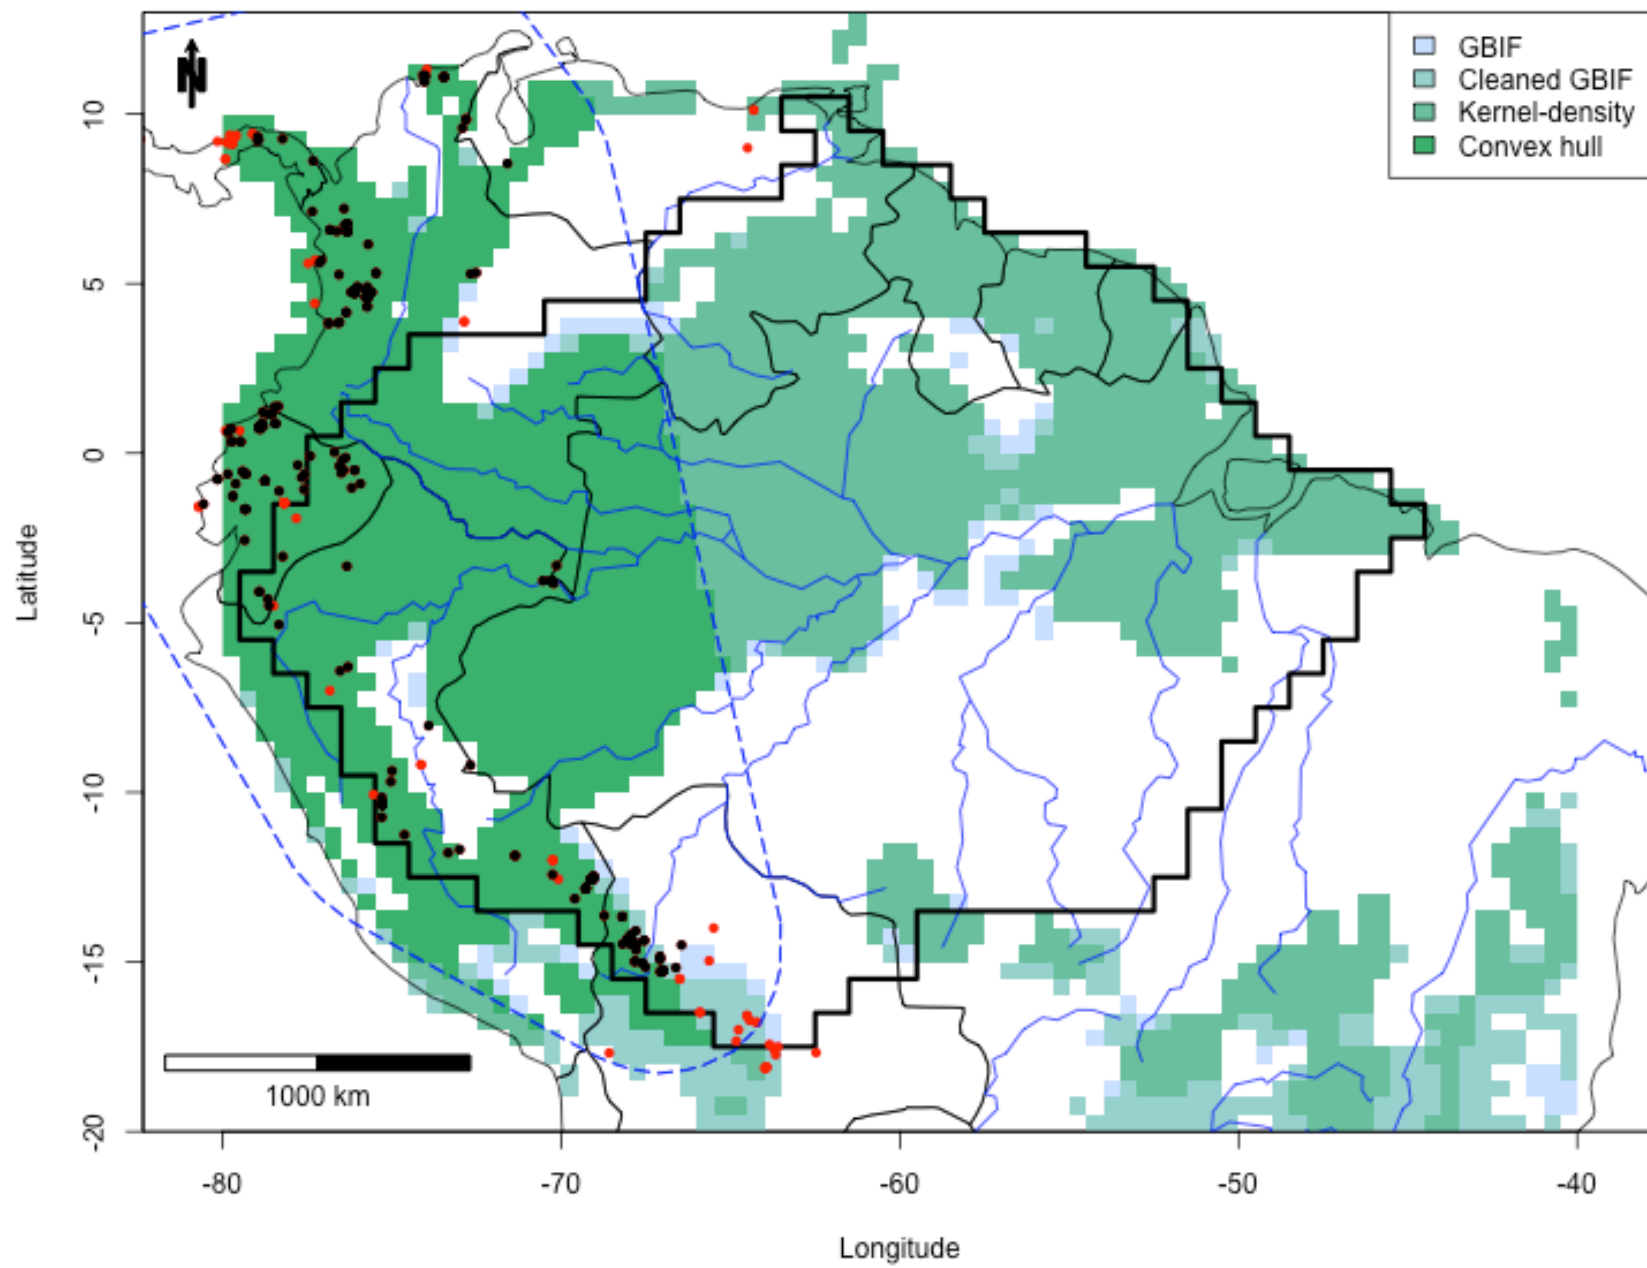

# Pourouma bicolor

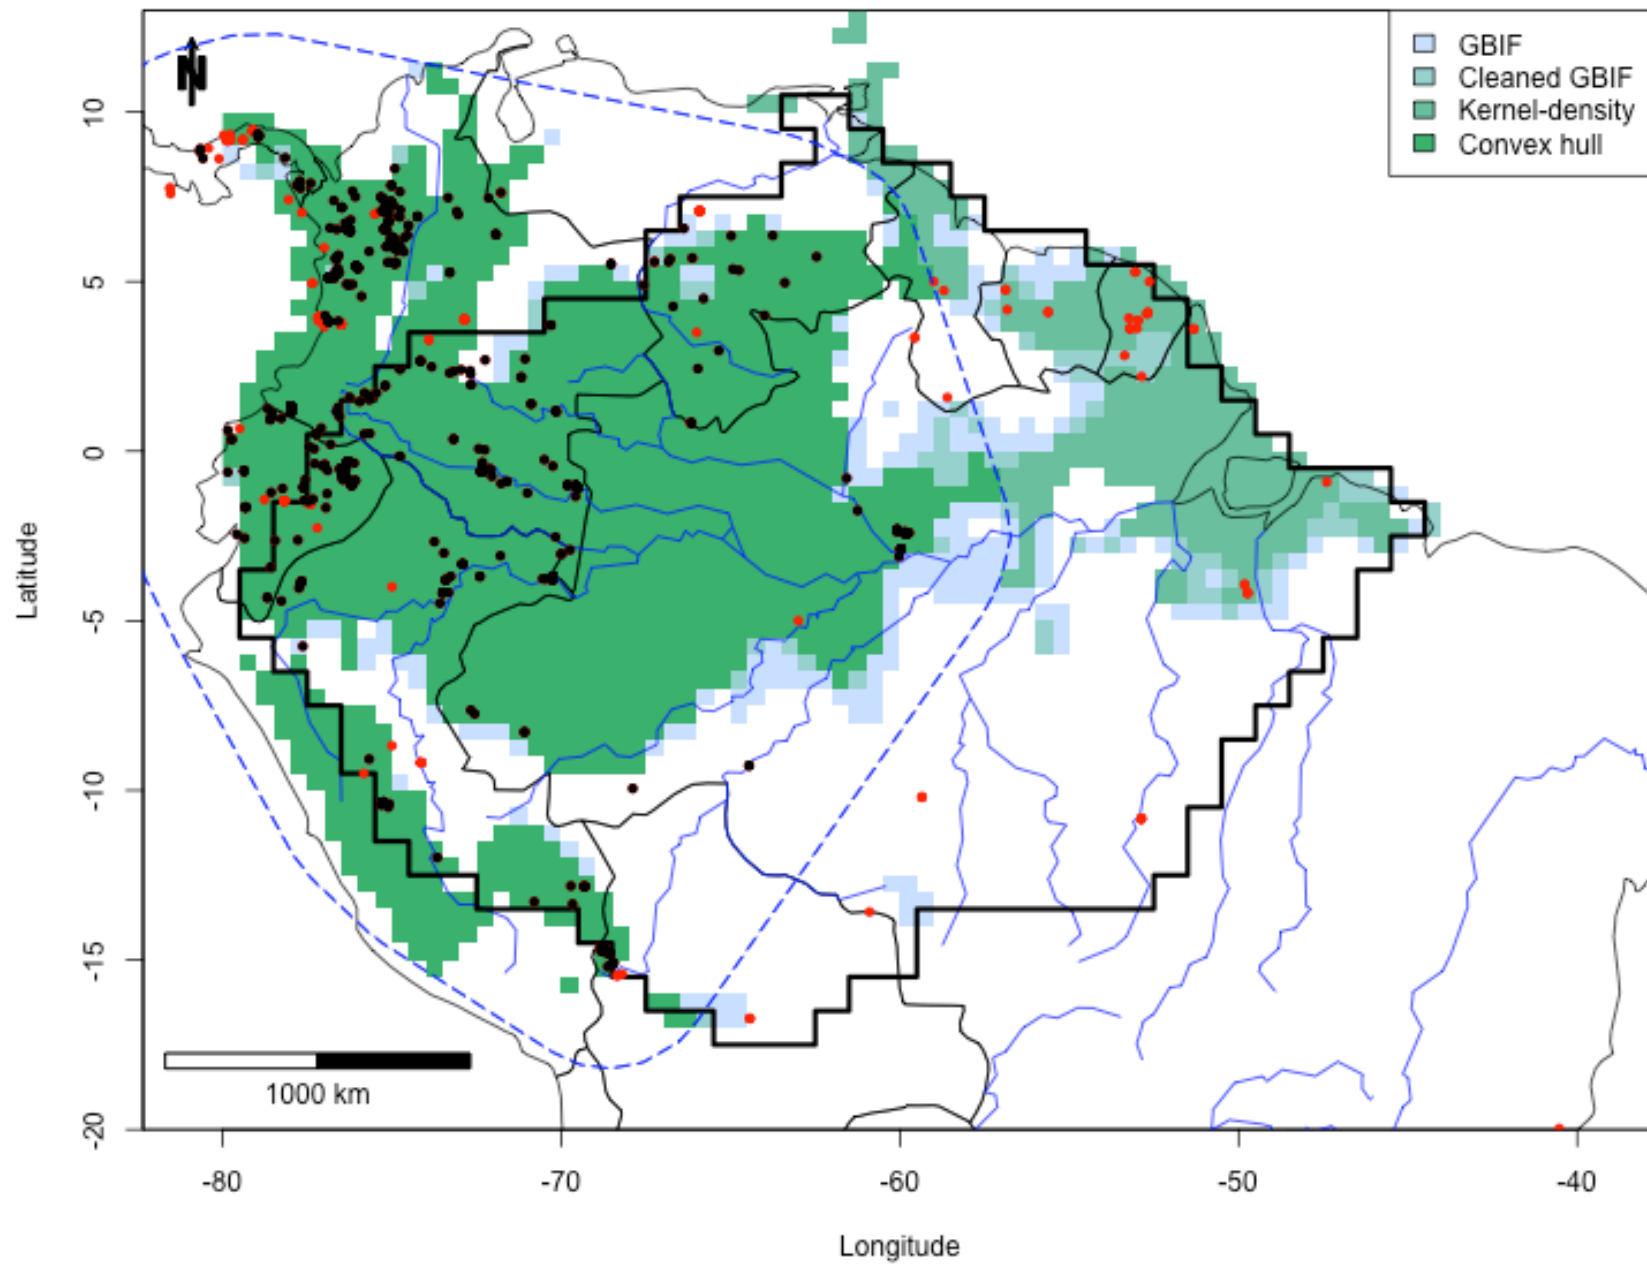

# Pourouma cecropiifolia

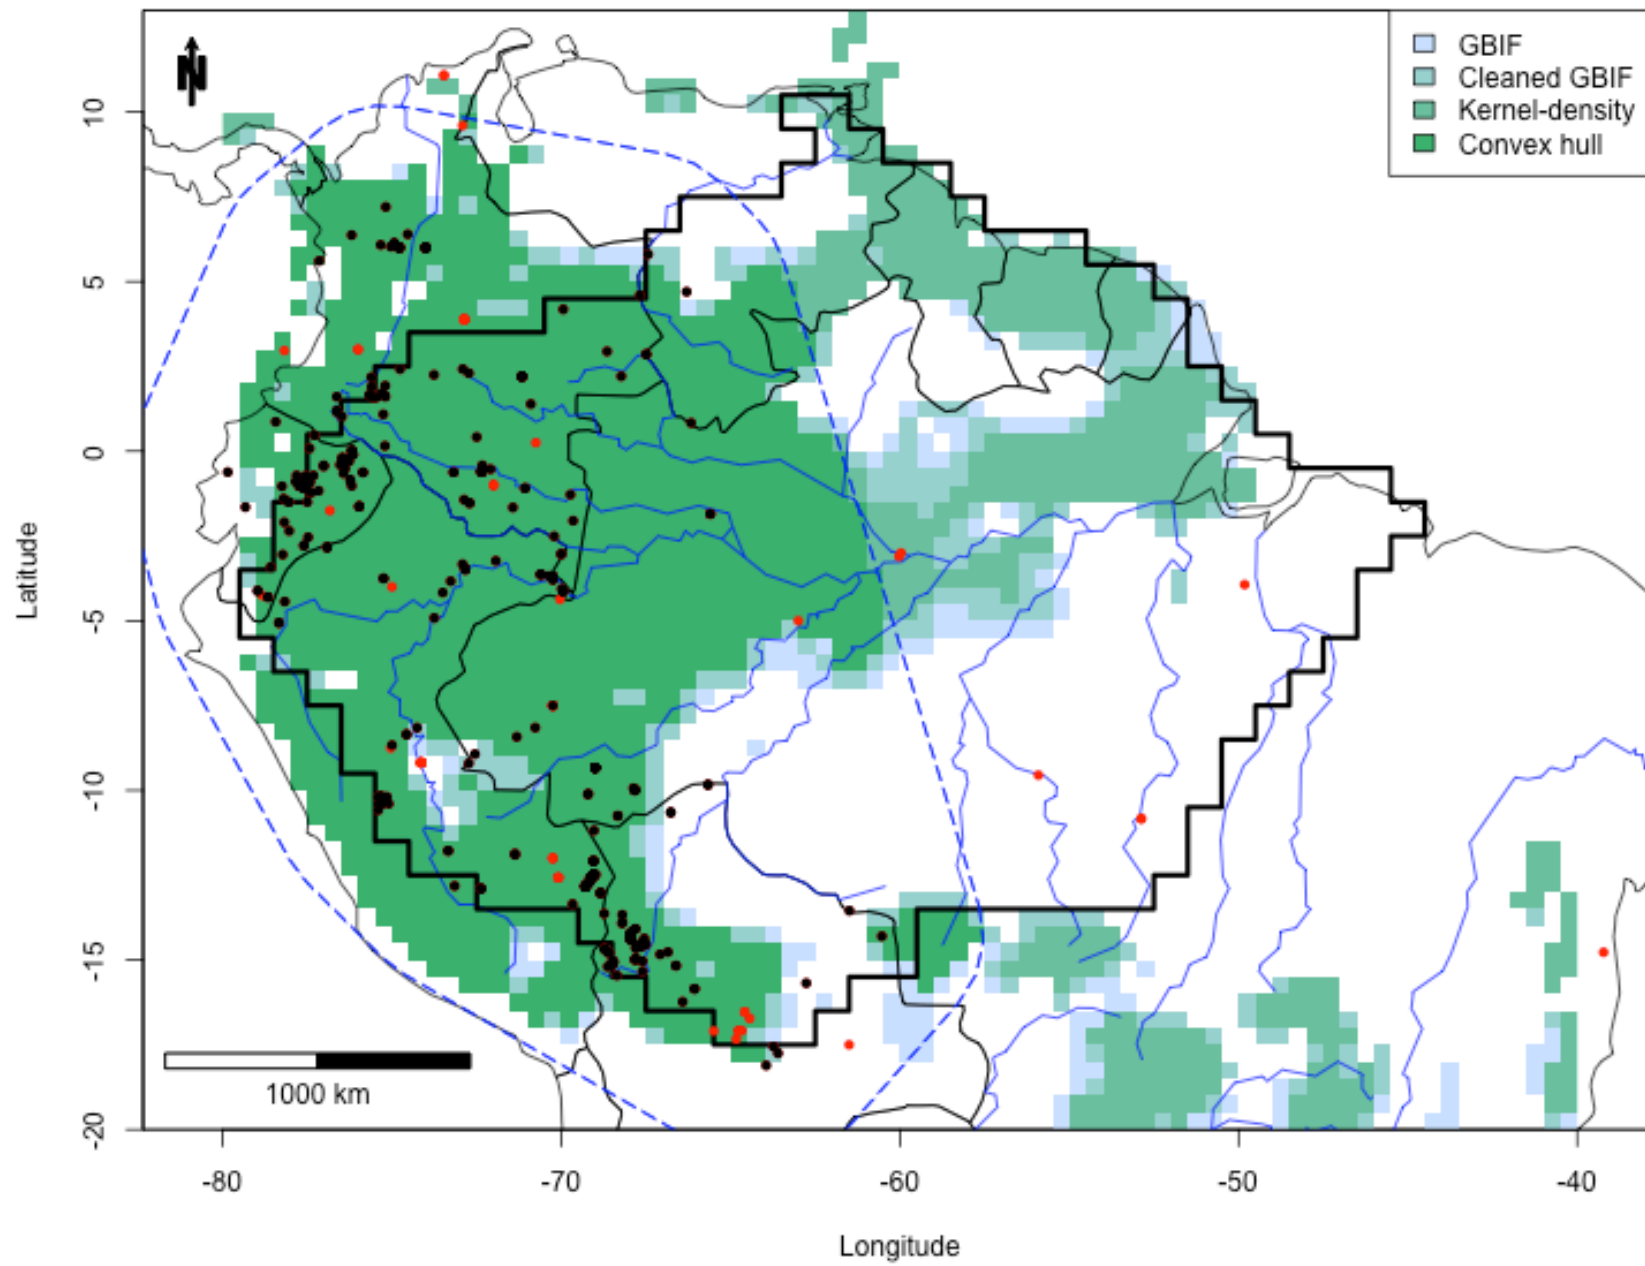

# Pourouma guianensis

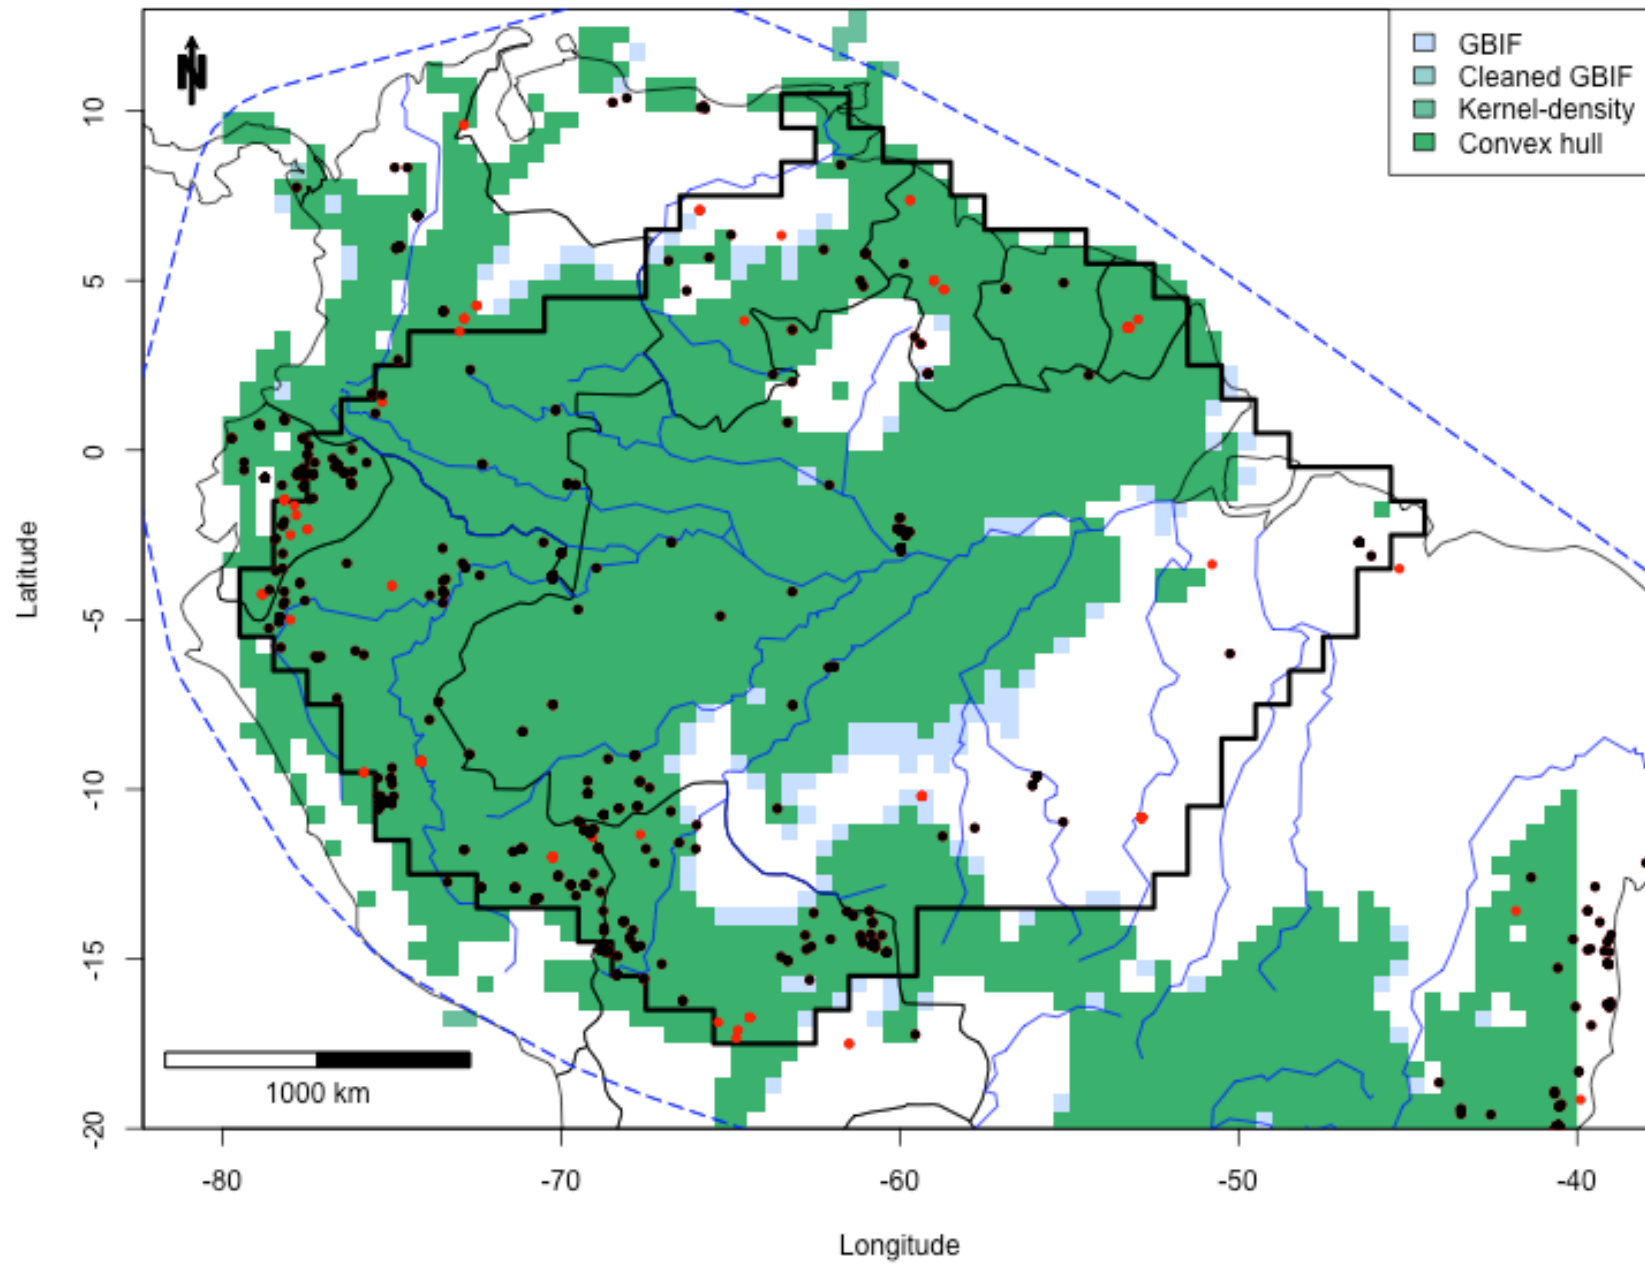



# Pourouma minor

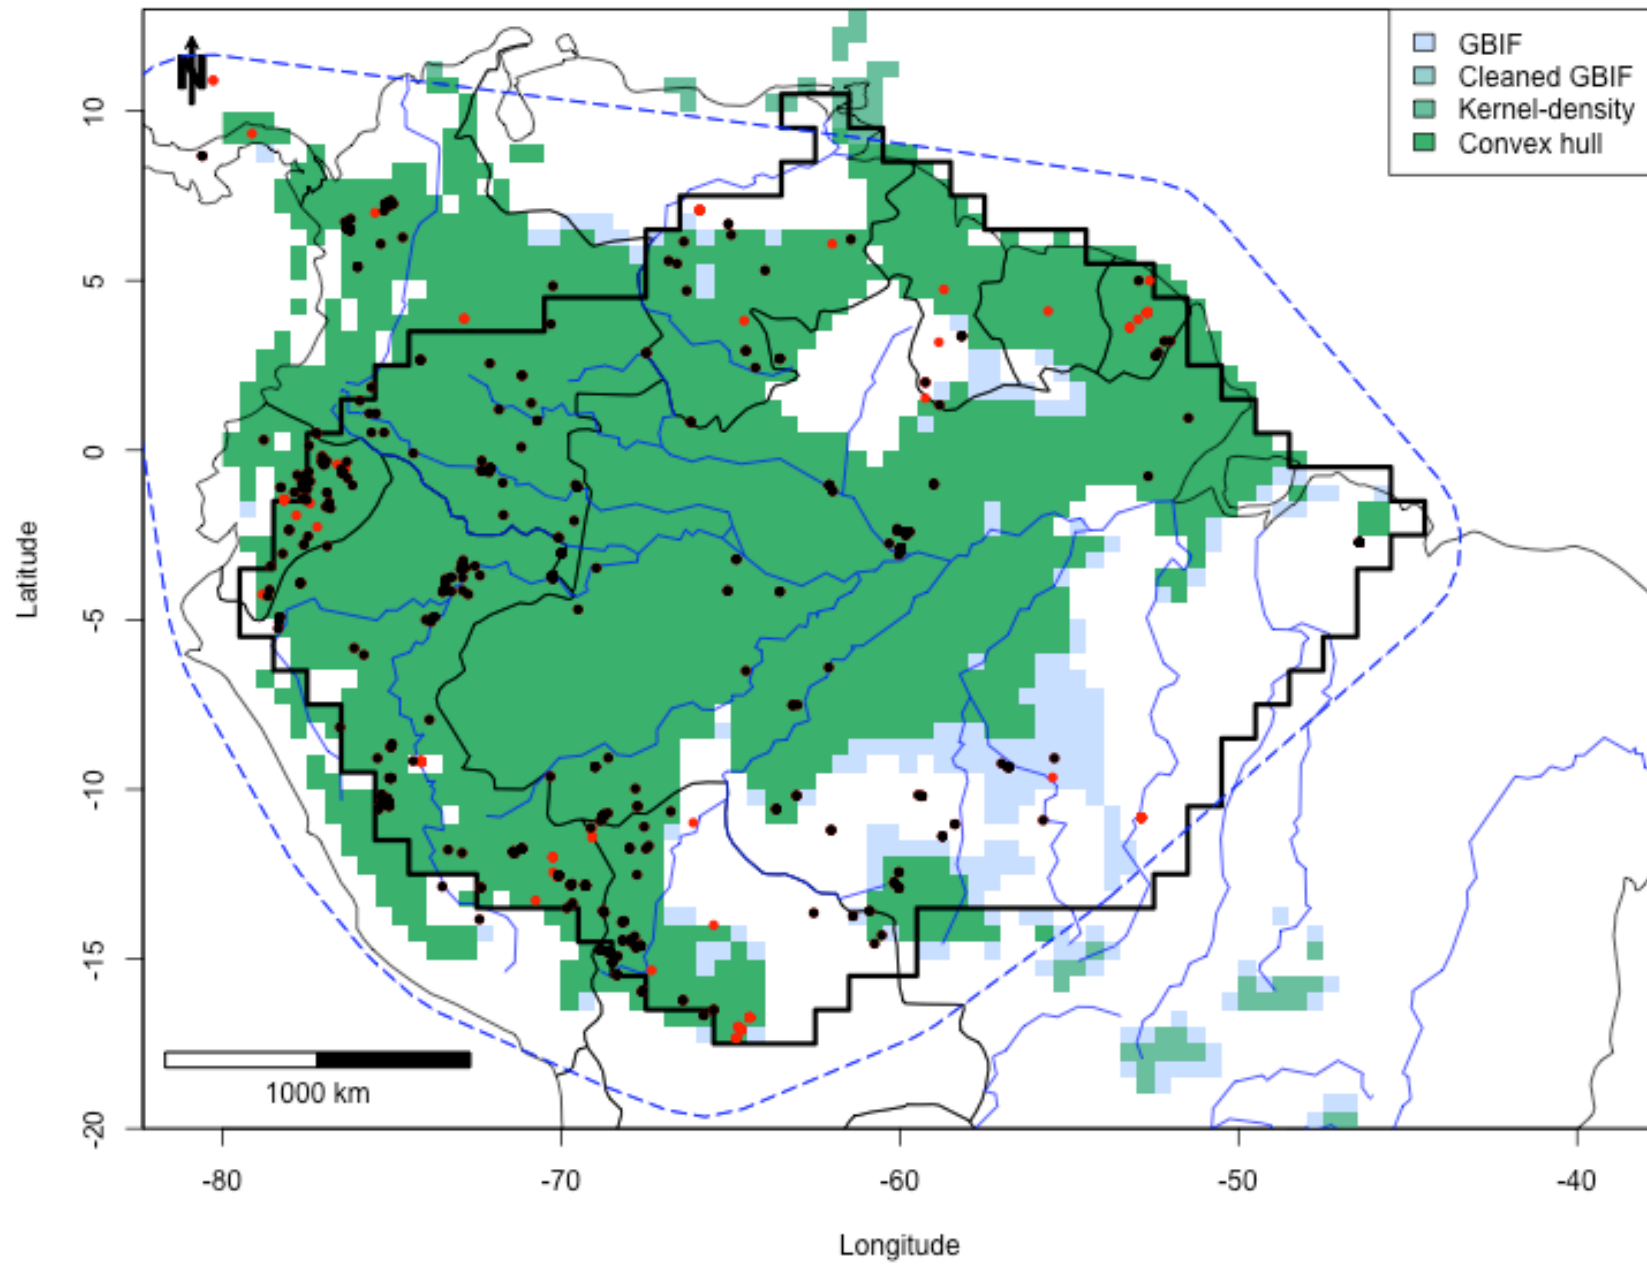

# Pouteria caimito

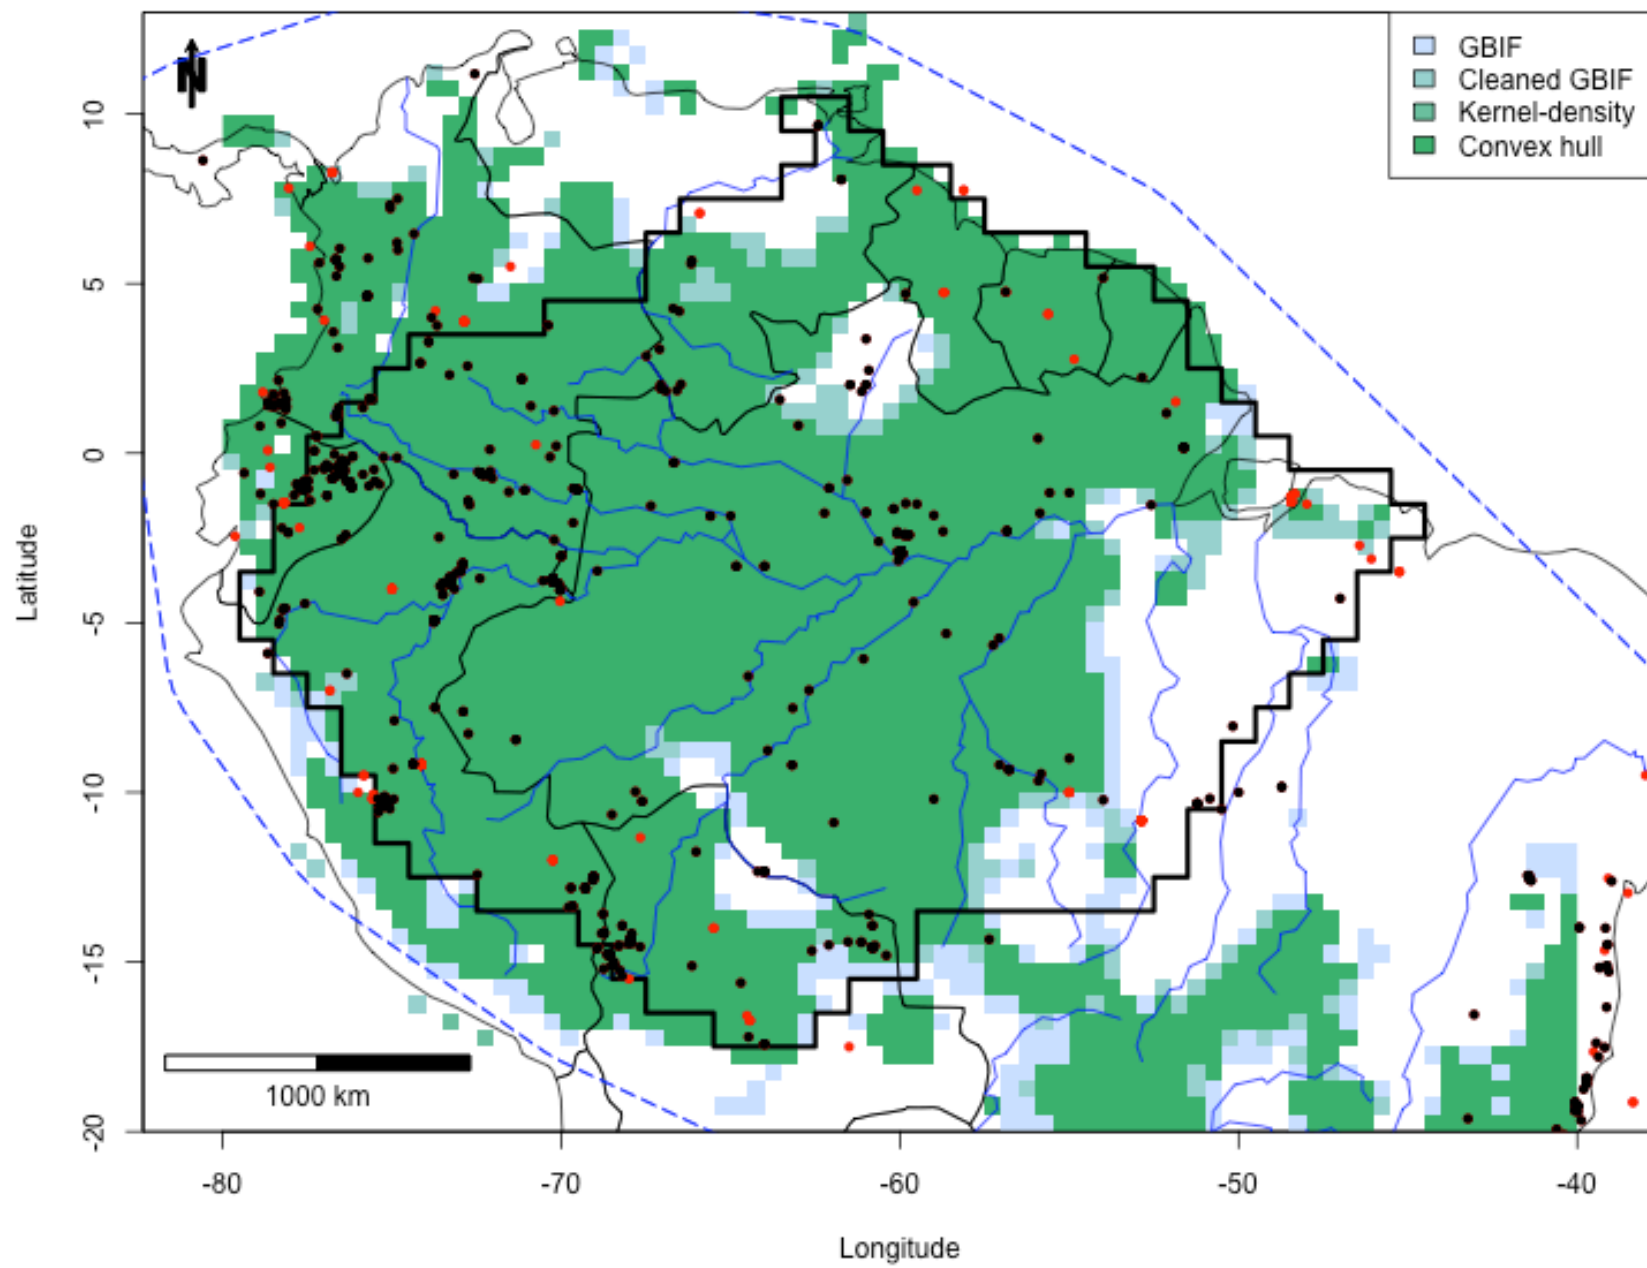

# Pouteria cuspidata

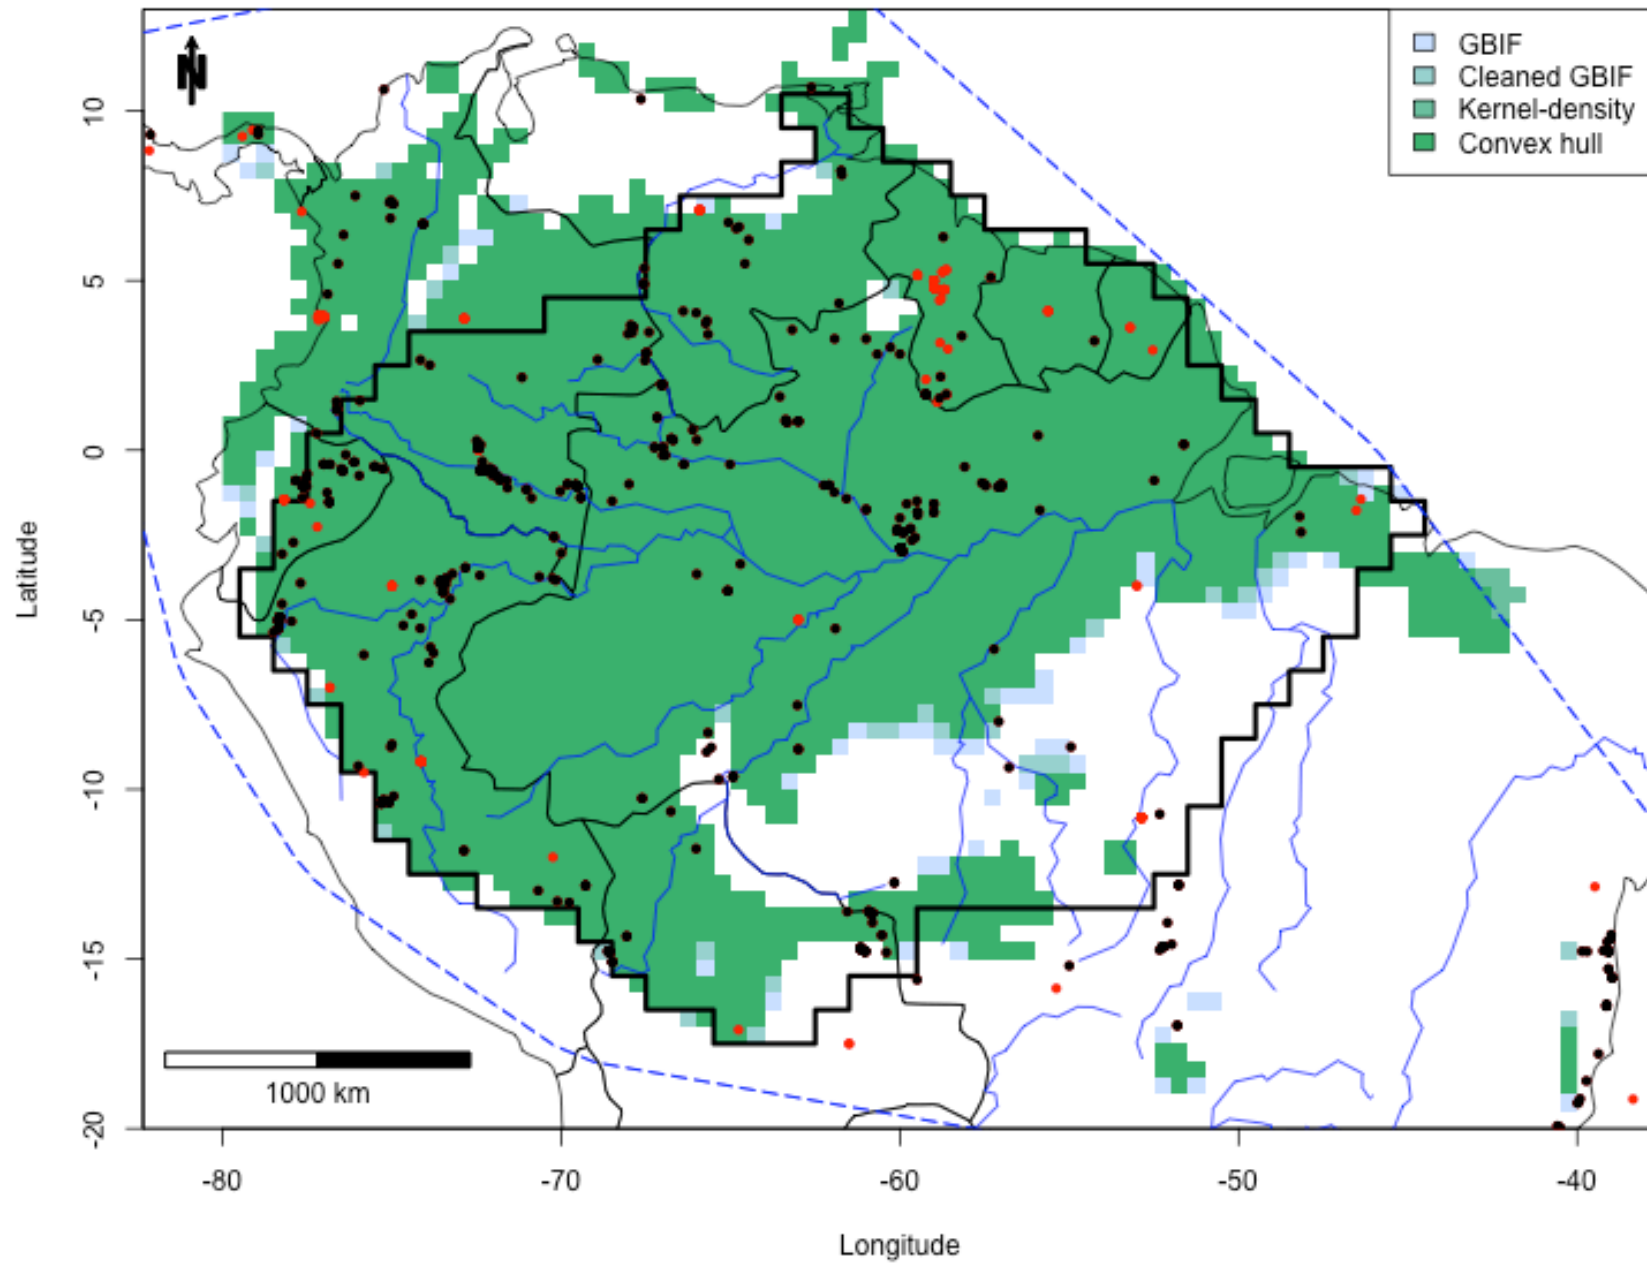

# *Pouteria elegans*

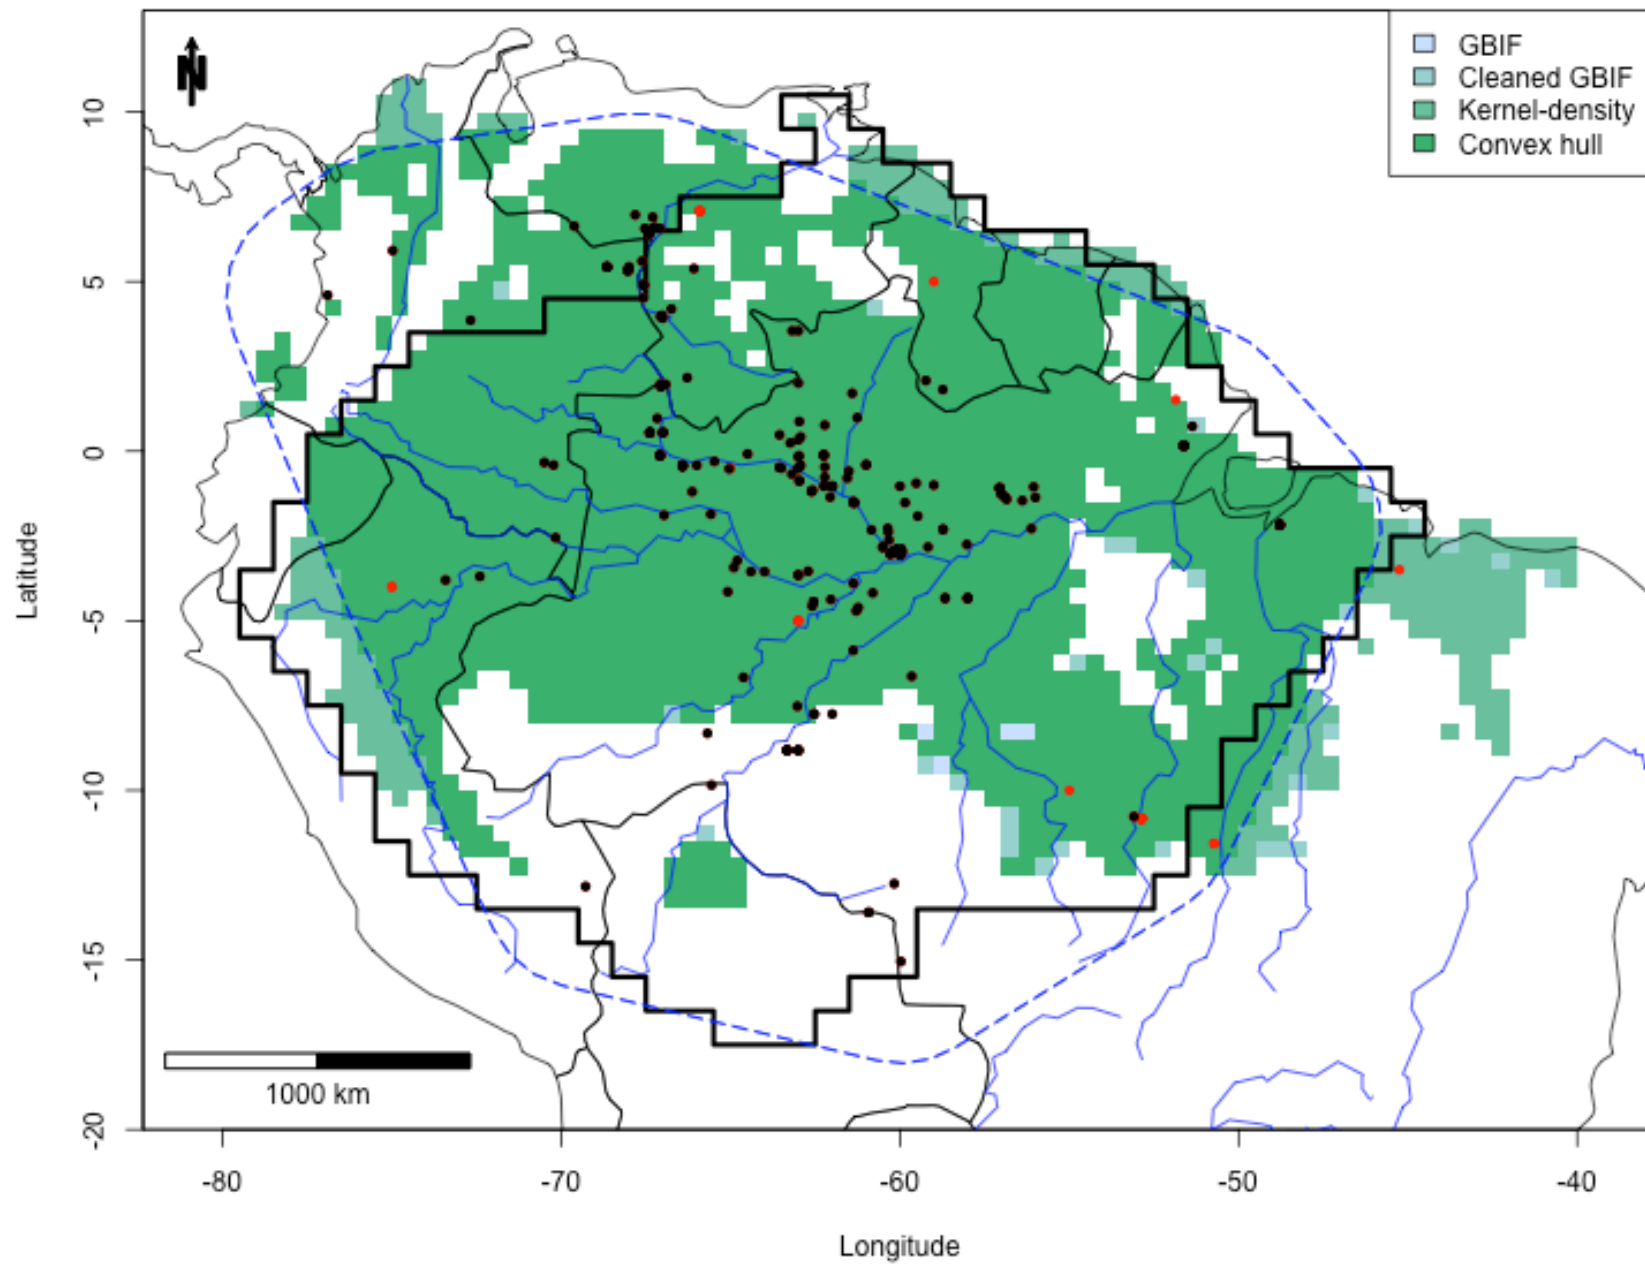

# *Pouteria guianensis*

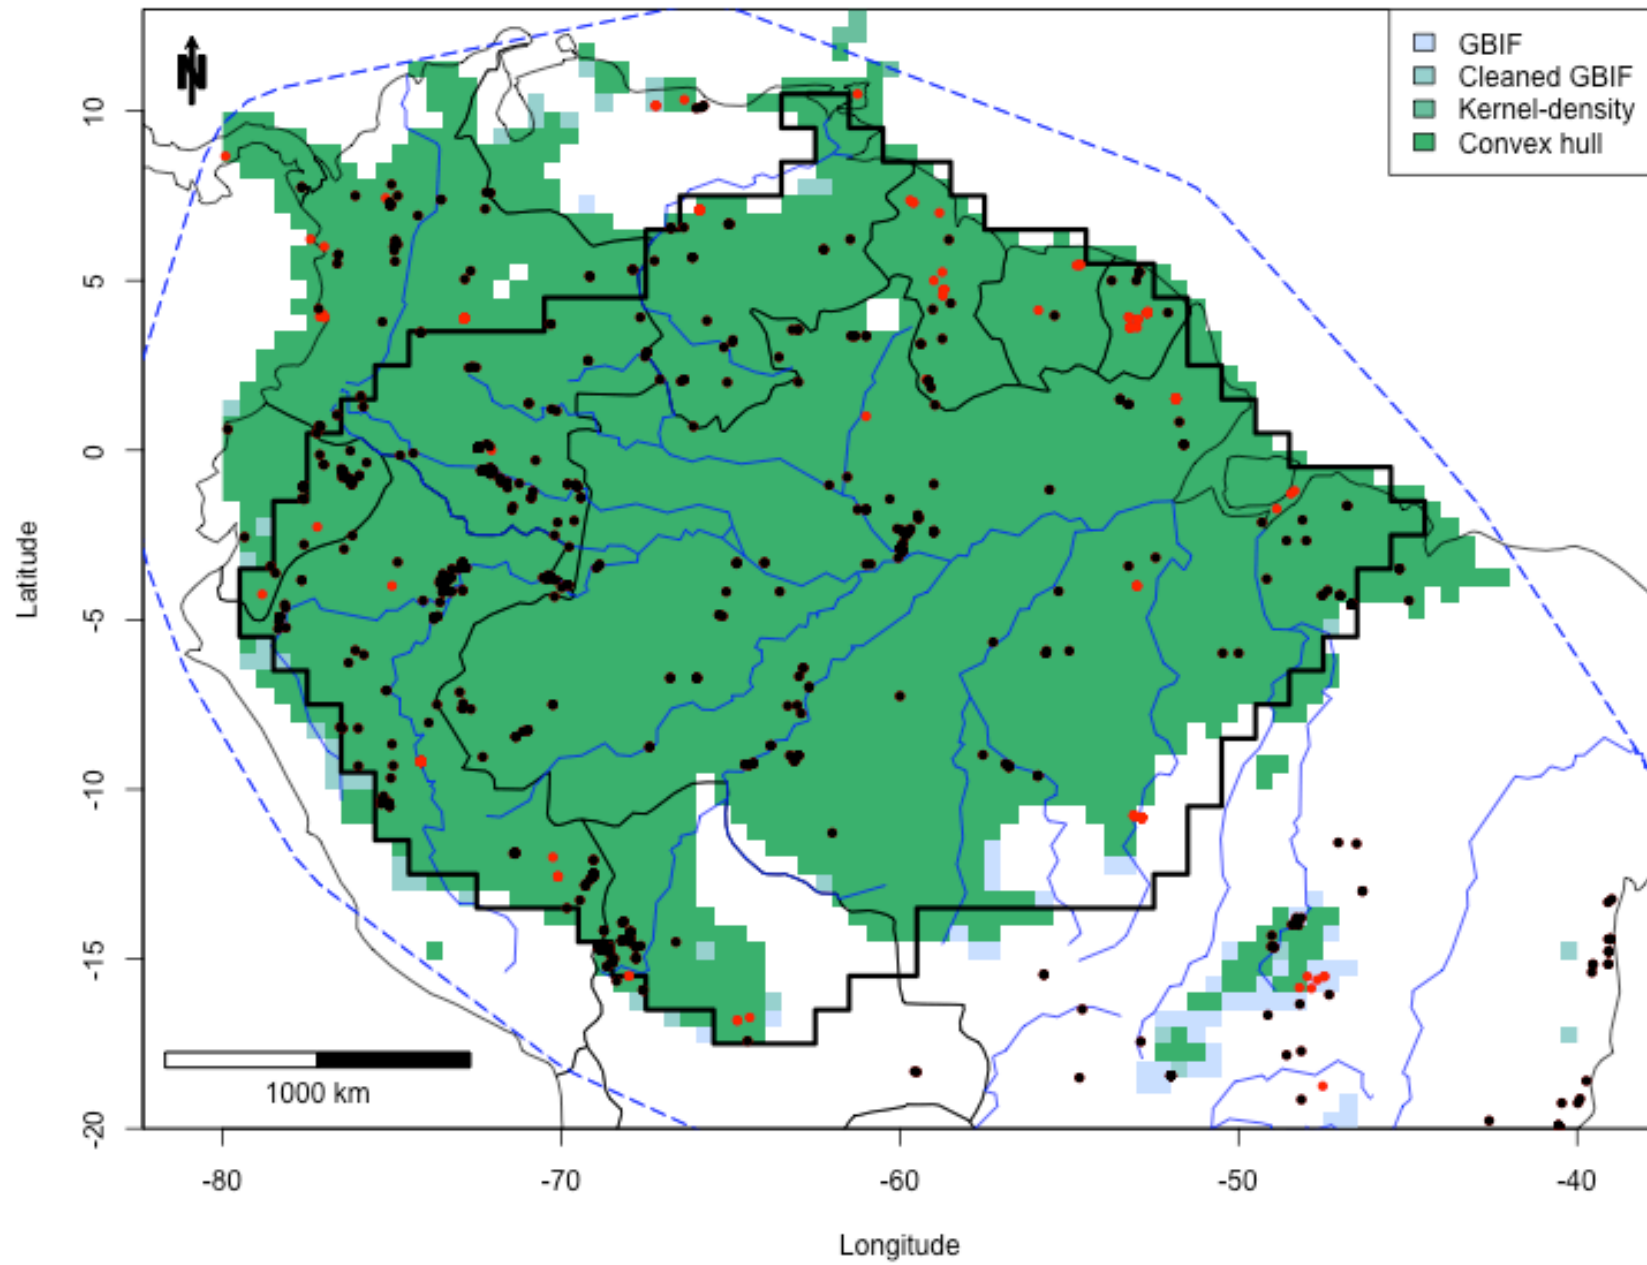

# *Pouteria reticulata*

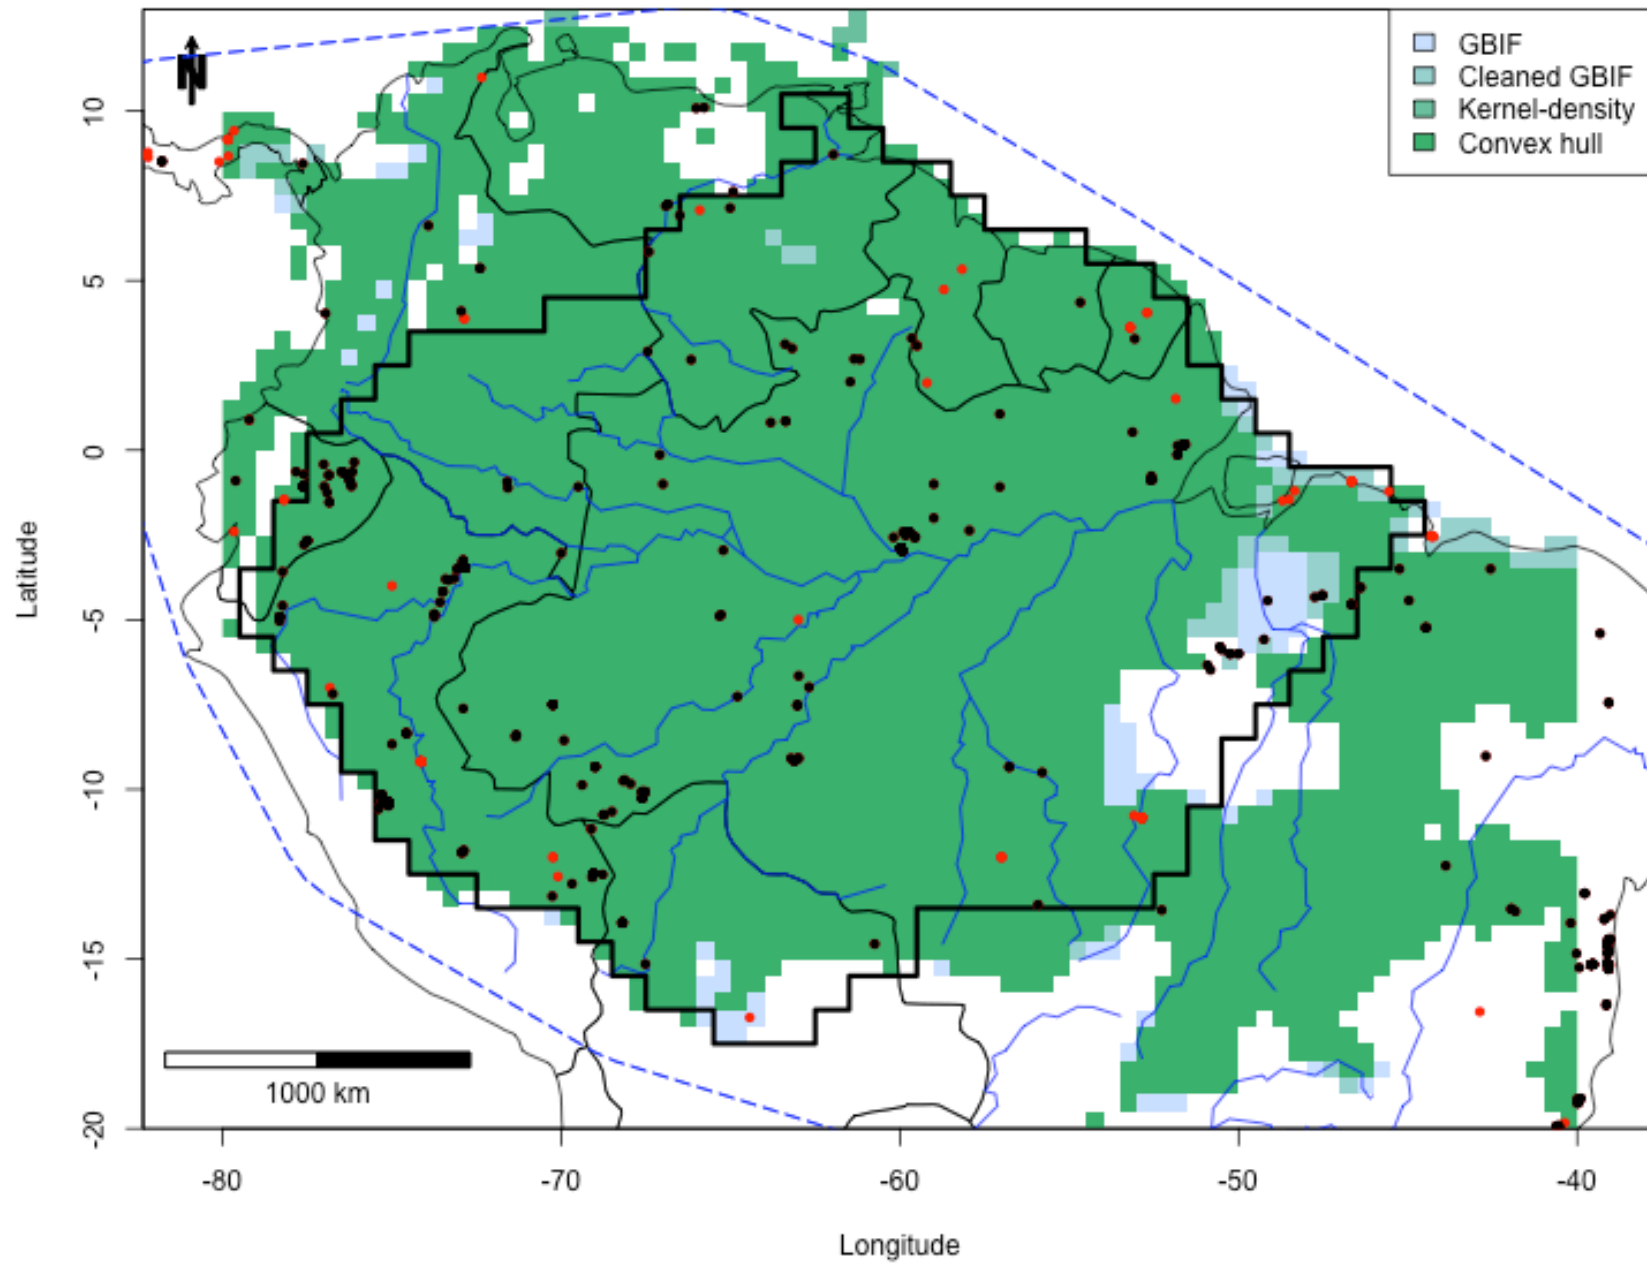

# Protium apiculatum

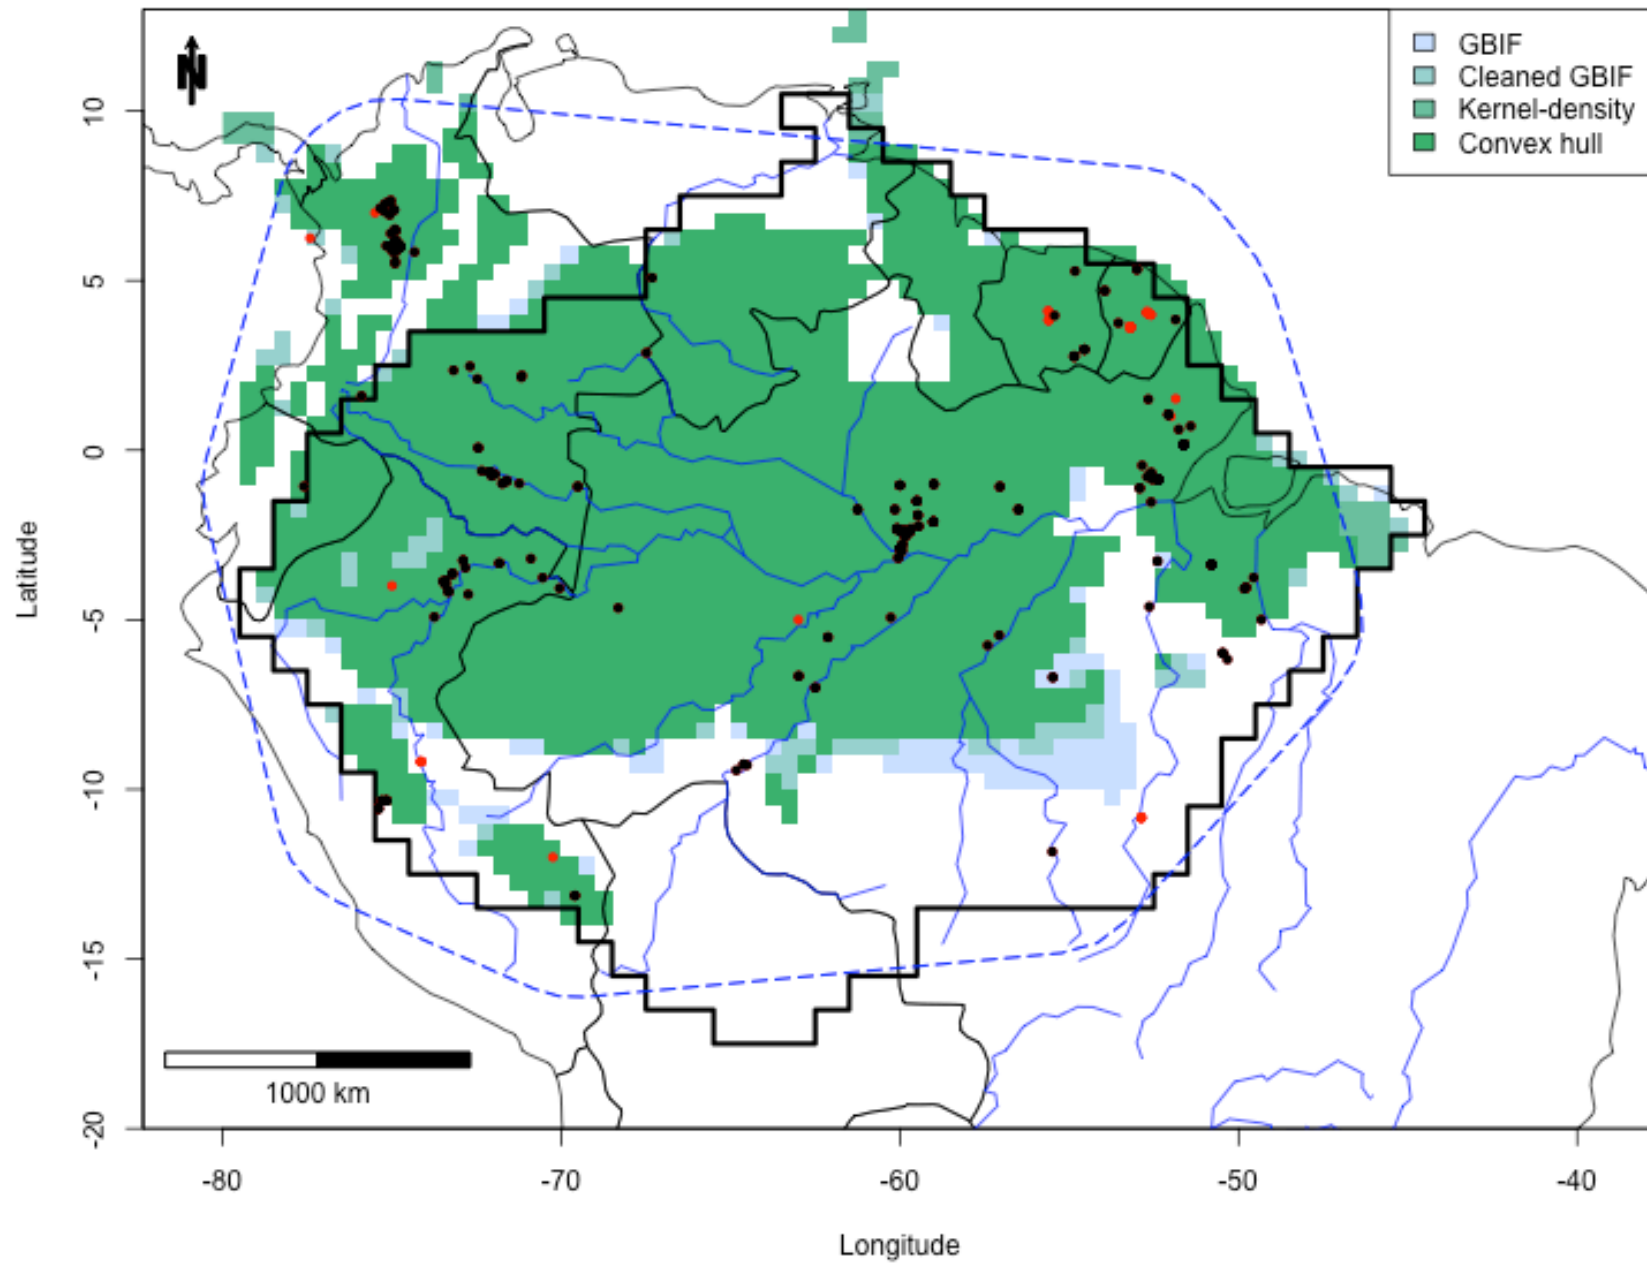



# Protium aracouchini

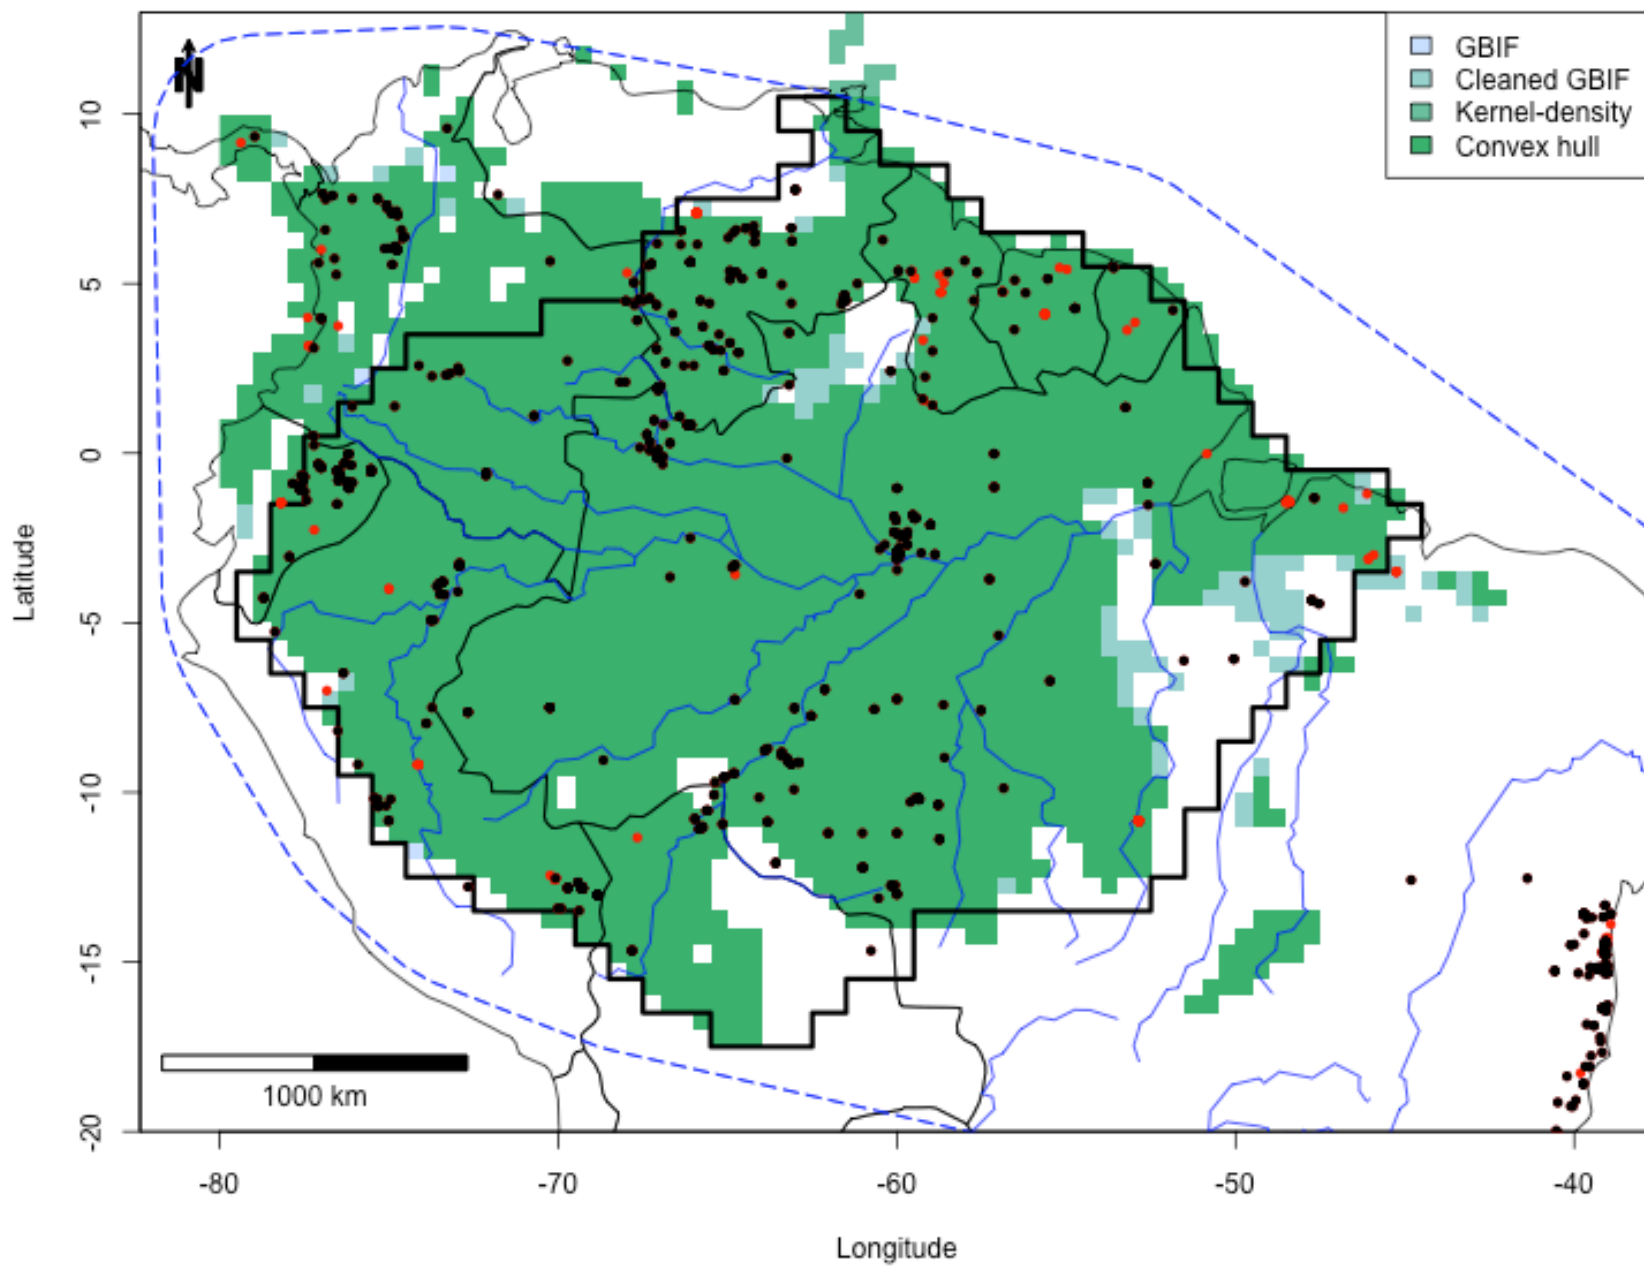

# Protium decandrum

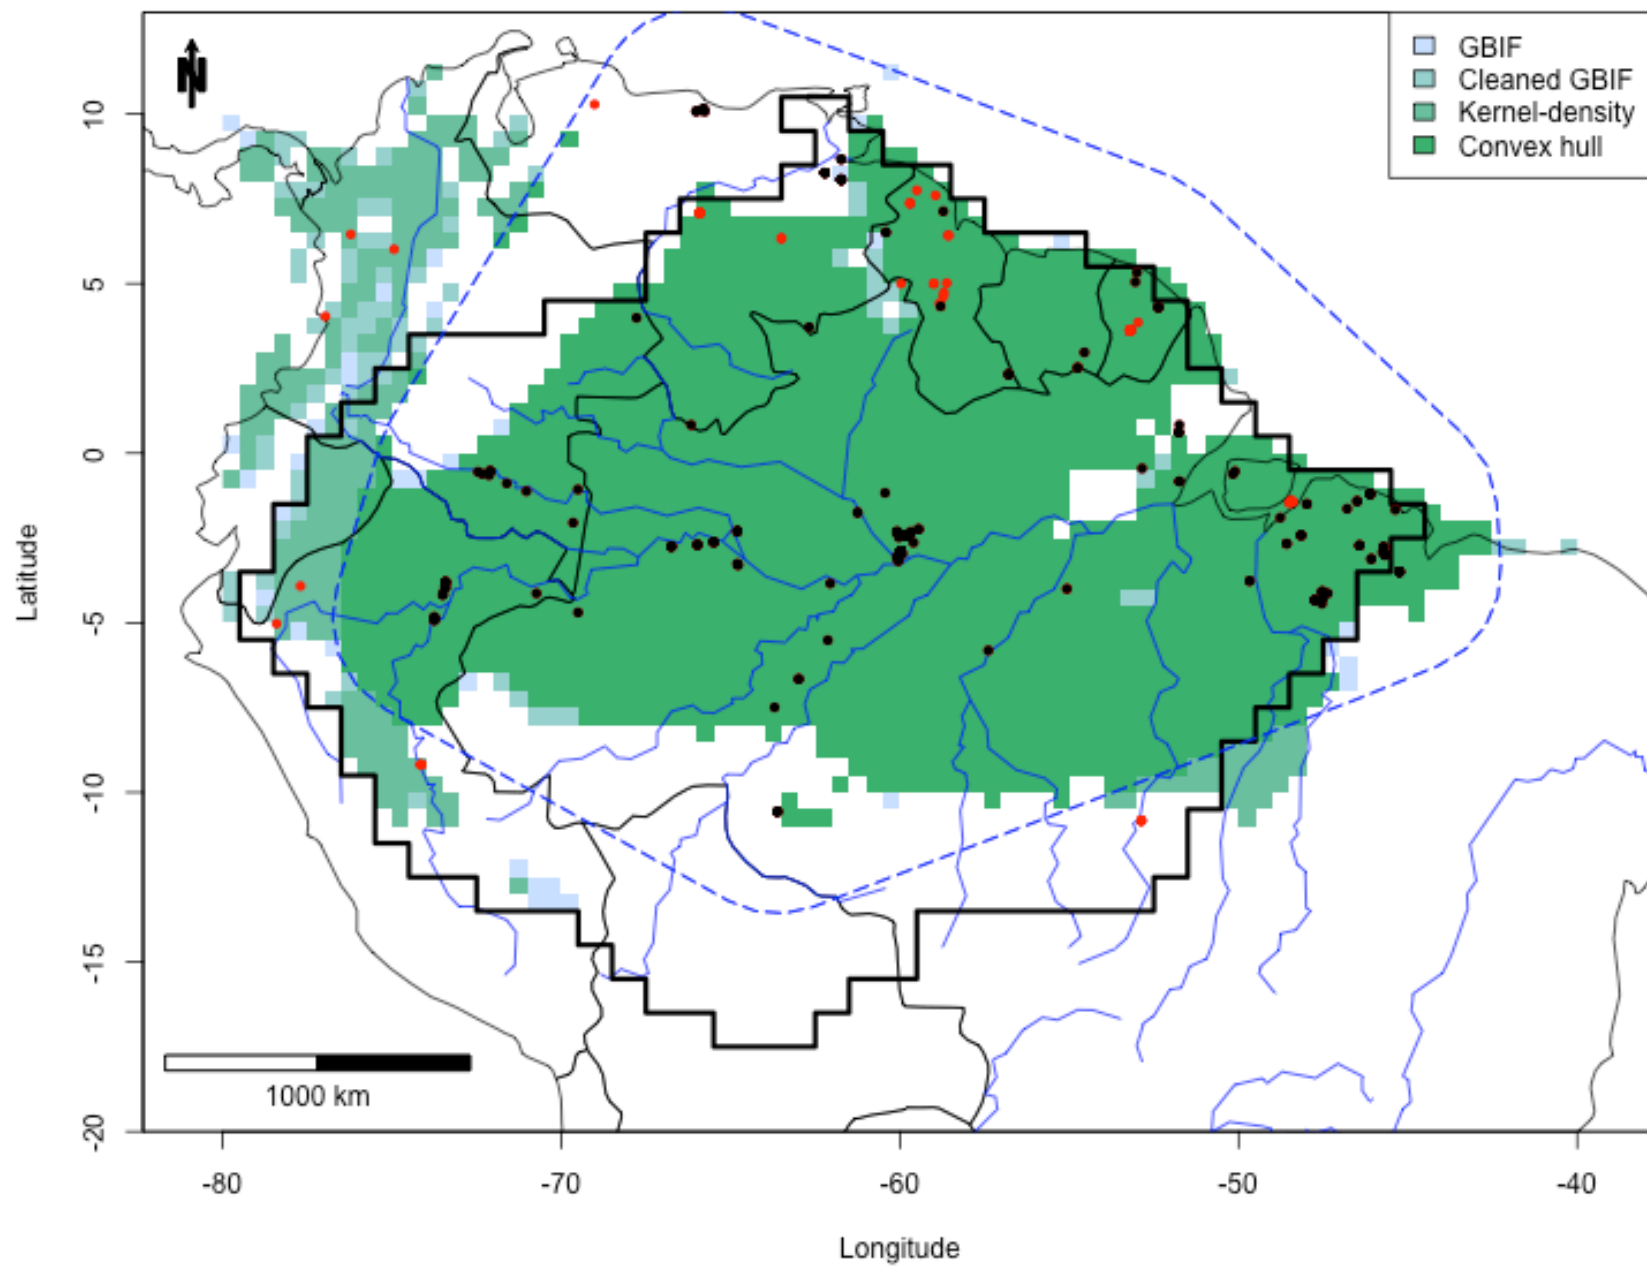

# Protium hebetatum

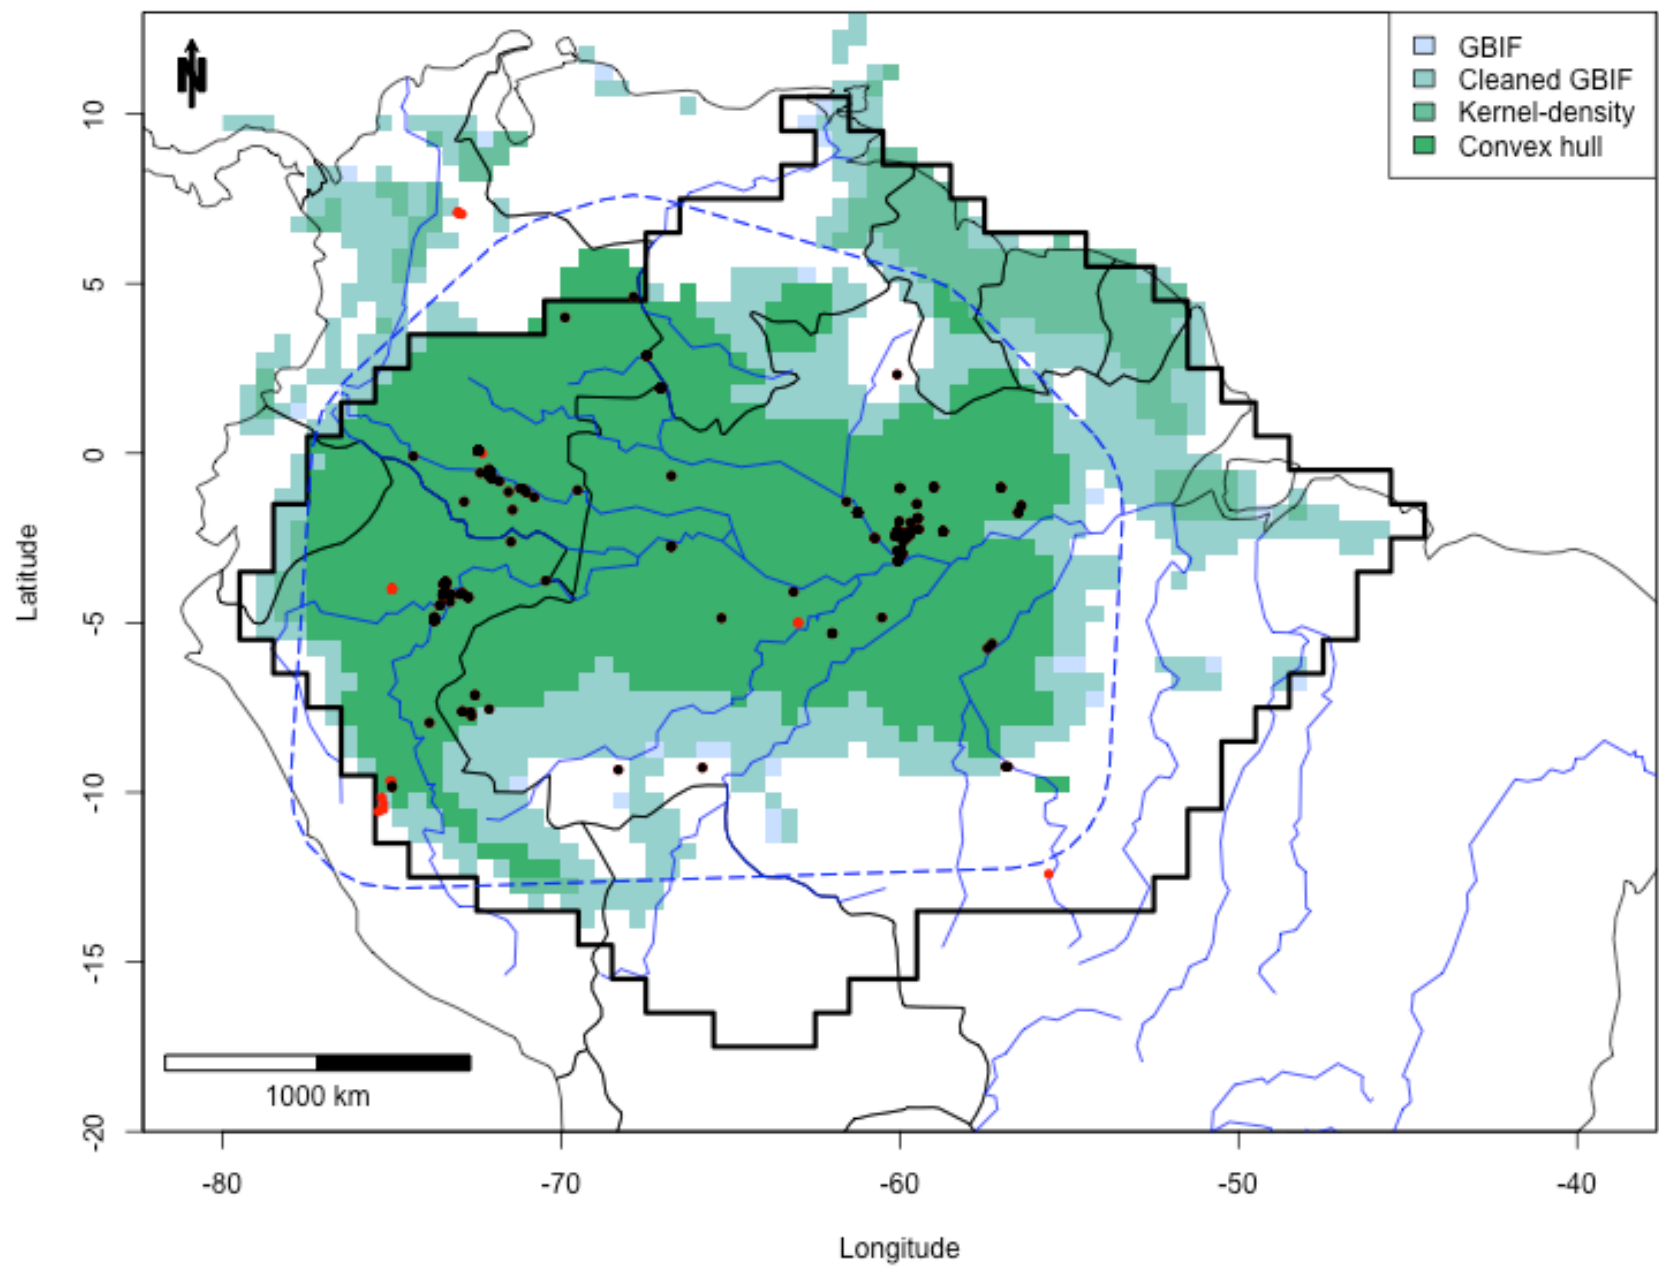

# Protium heptaphyllum

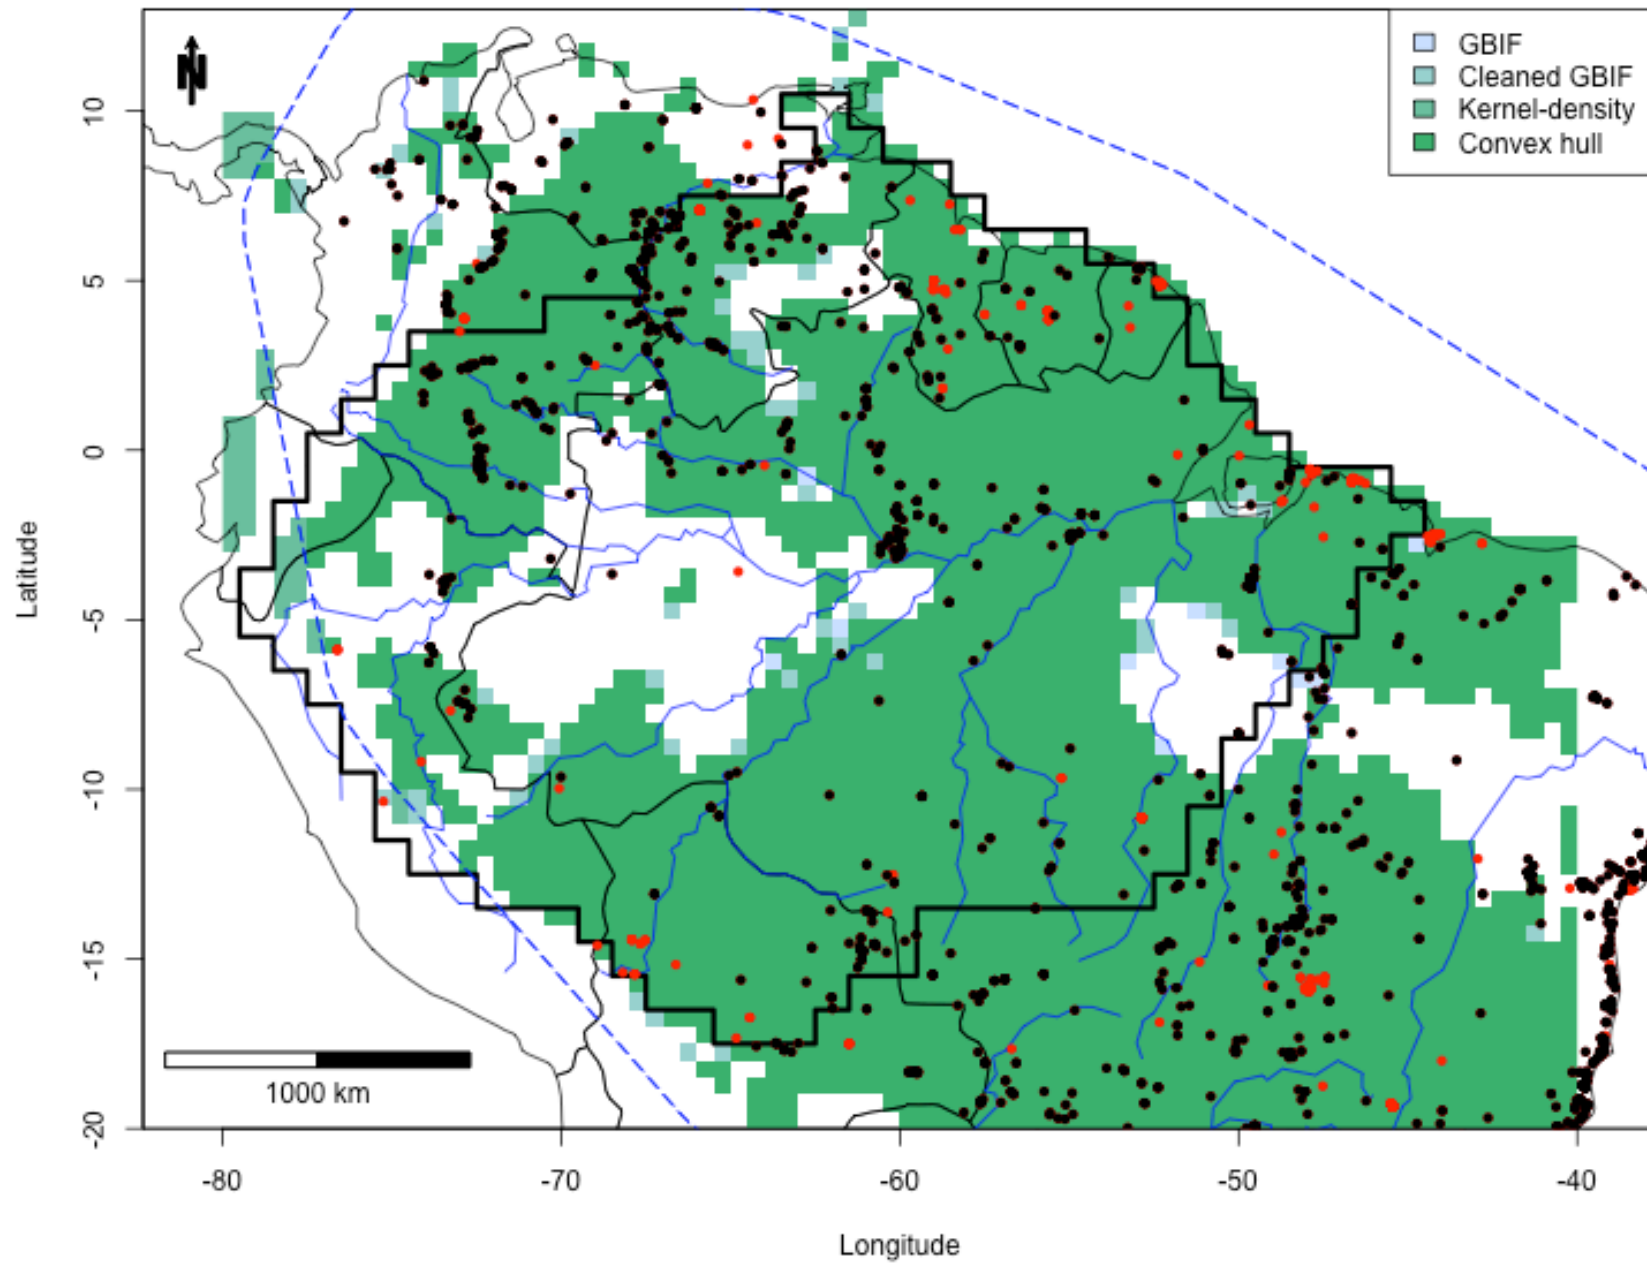

# Protium sagotianum

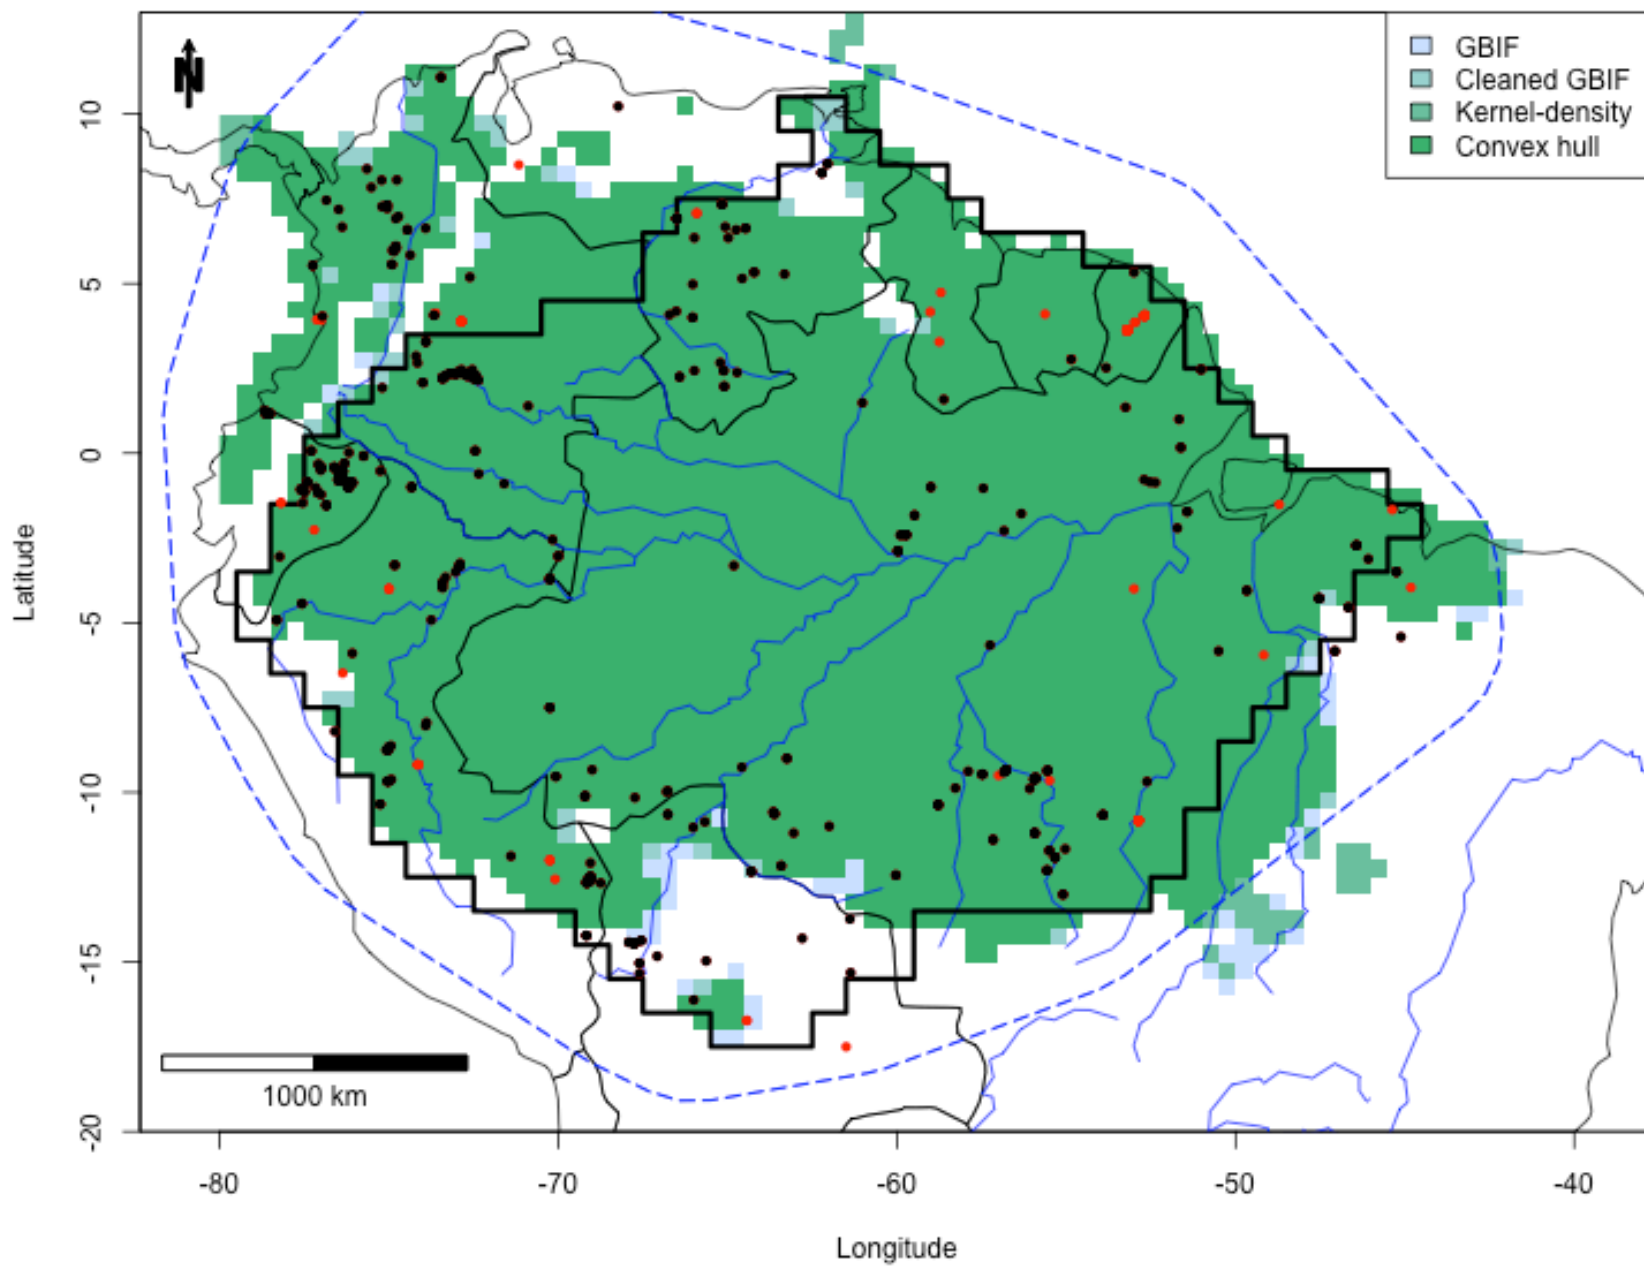

# Protium tenuifolium

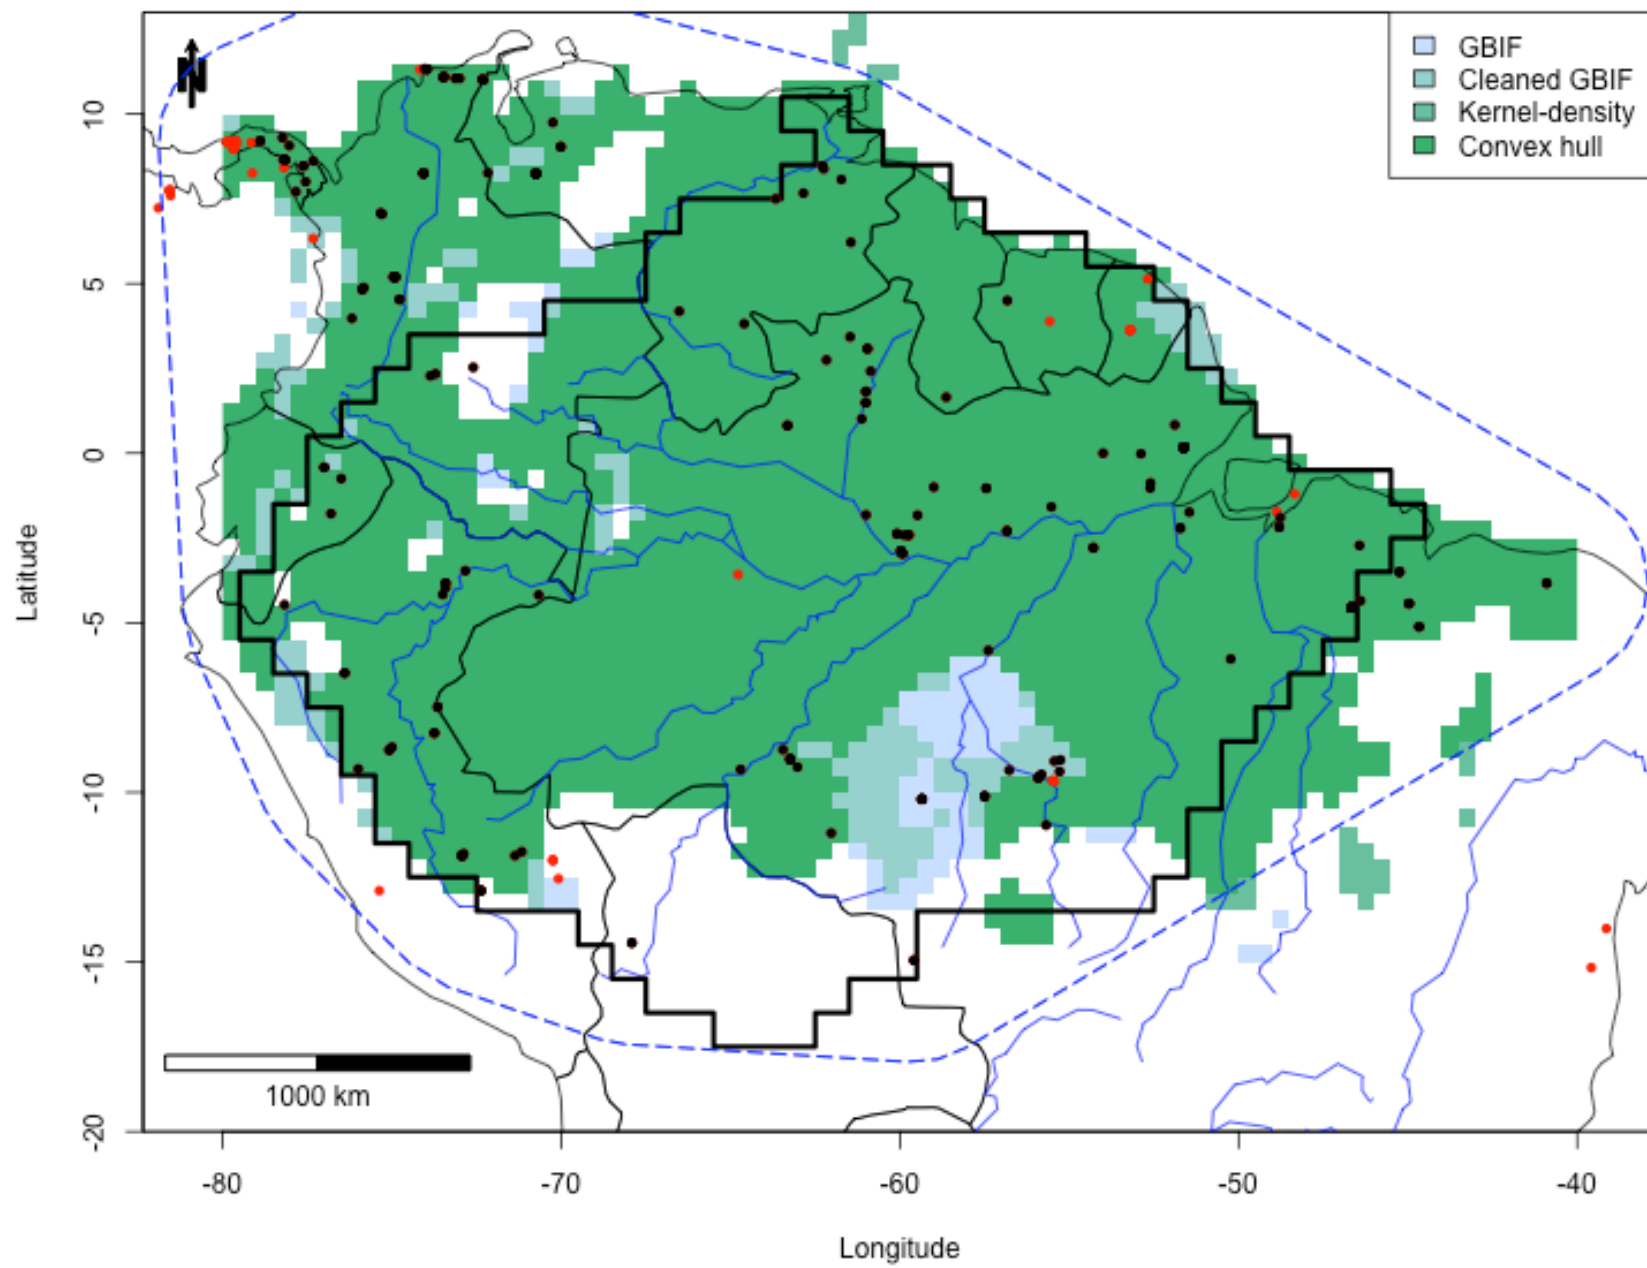

# Protium trifoliolatum

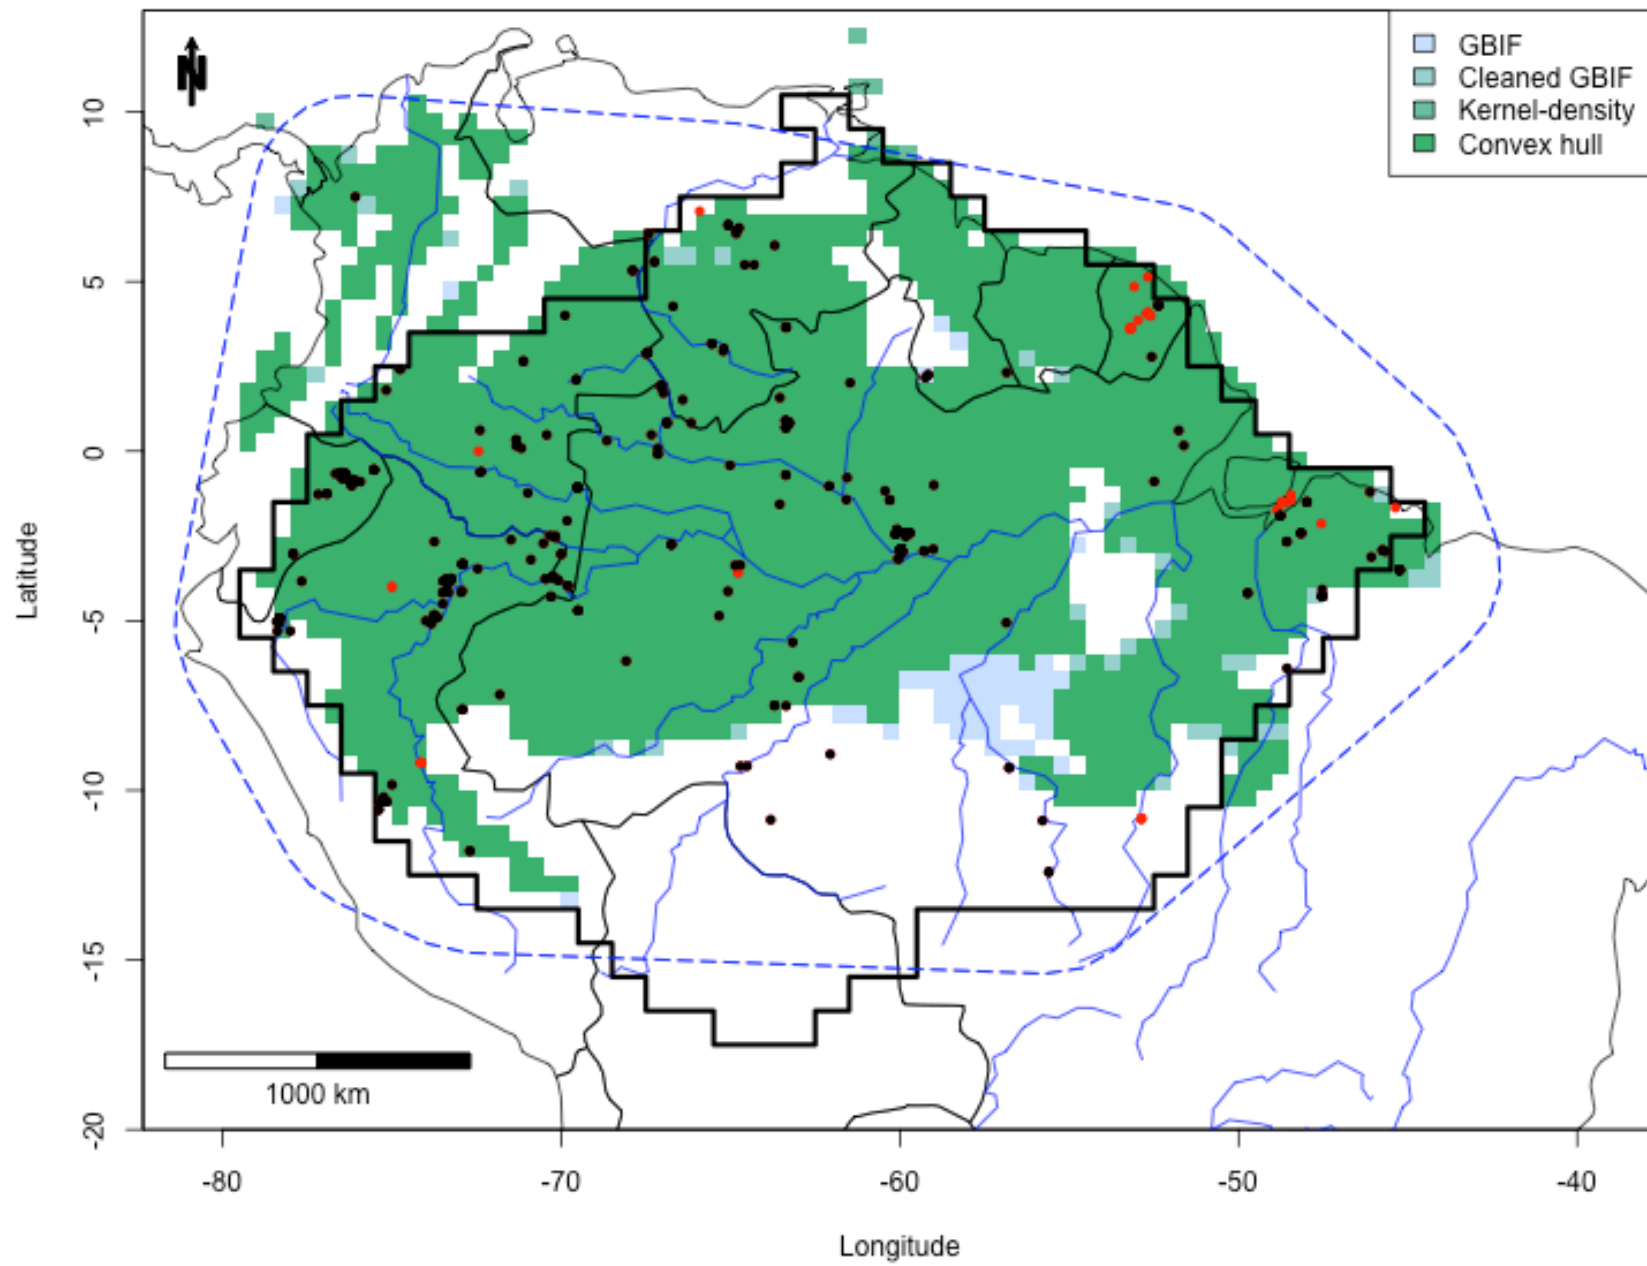



# *Pseudobombax munguba*

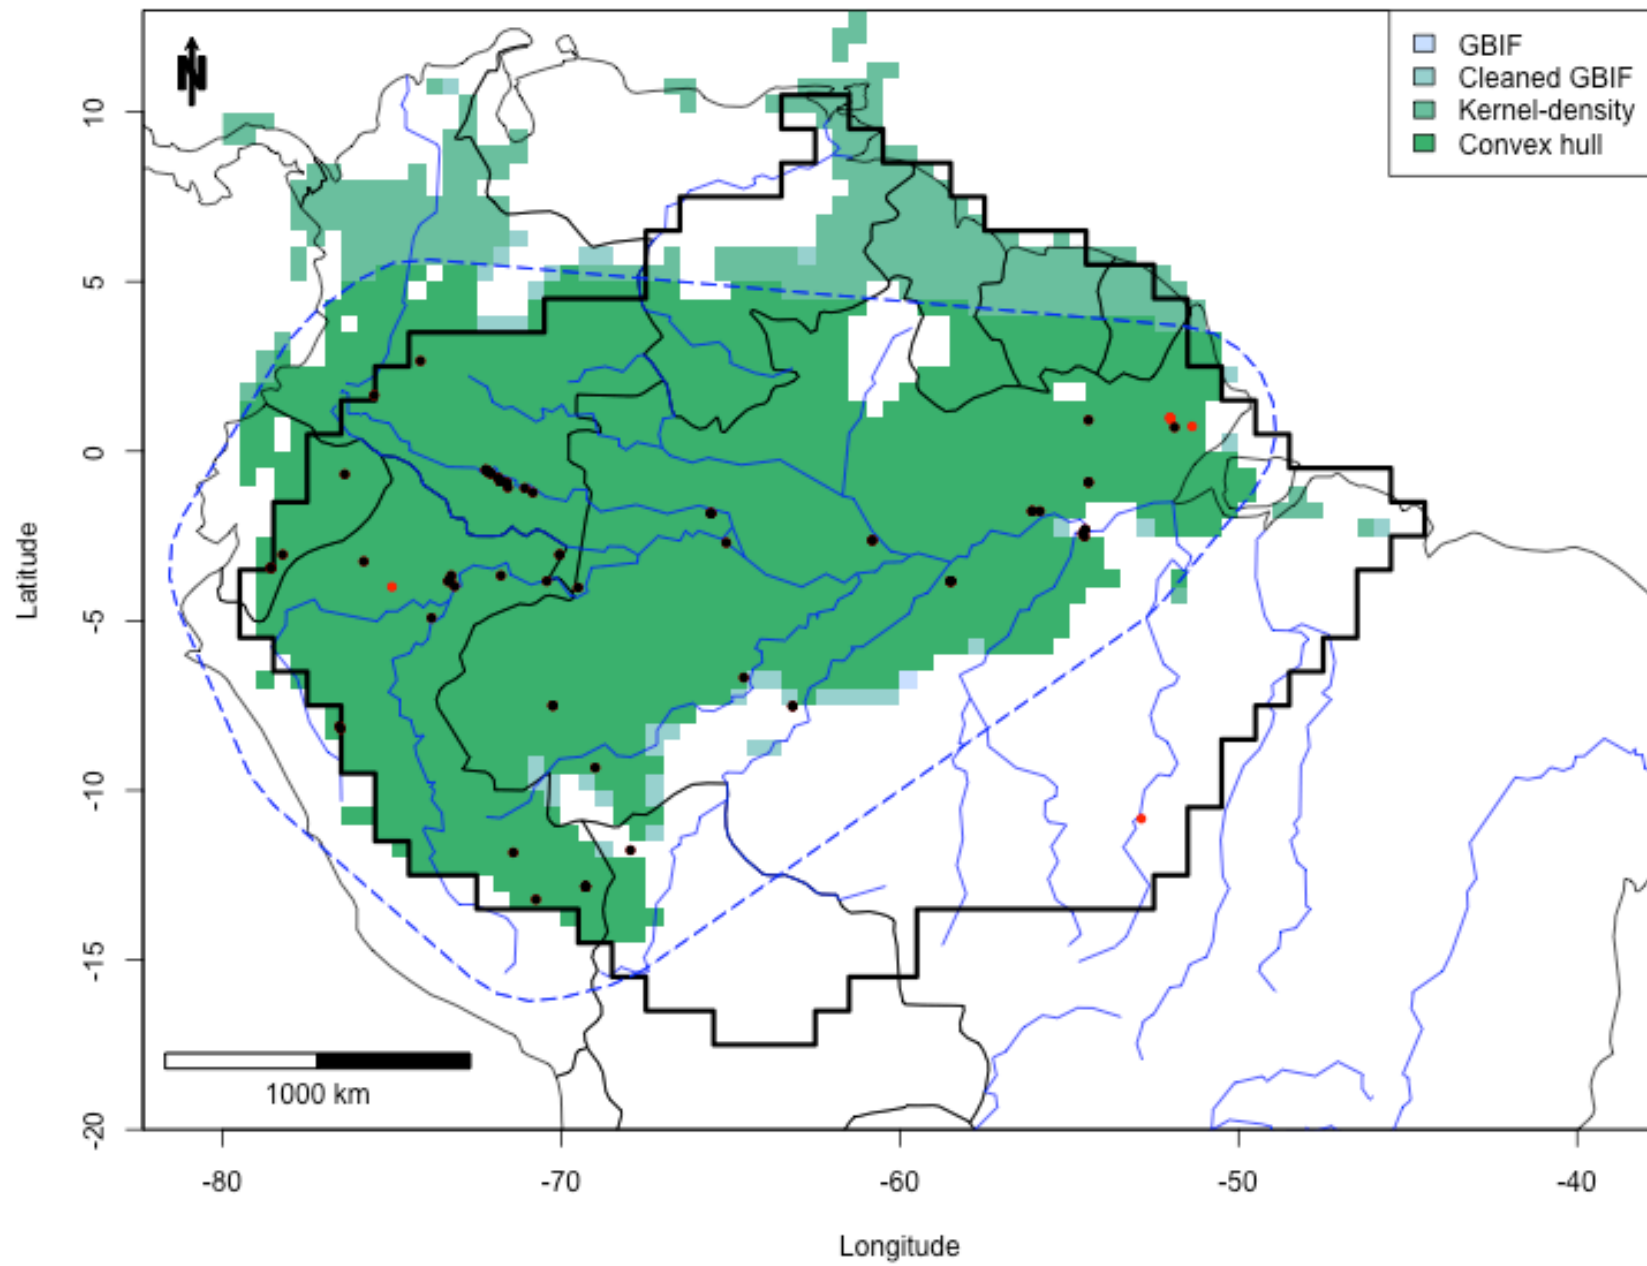

# *Pseudolmedia laevigata*

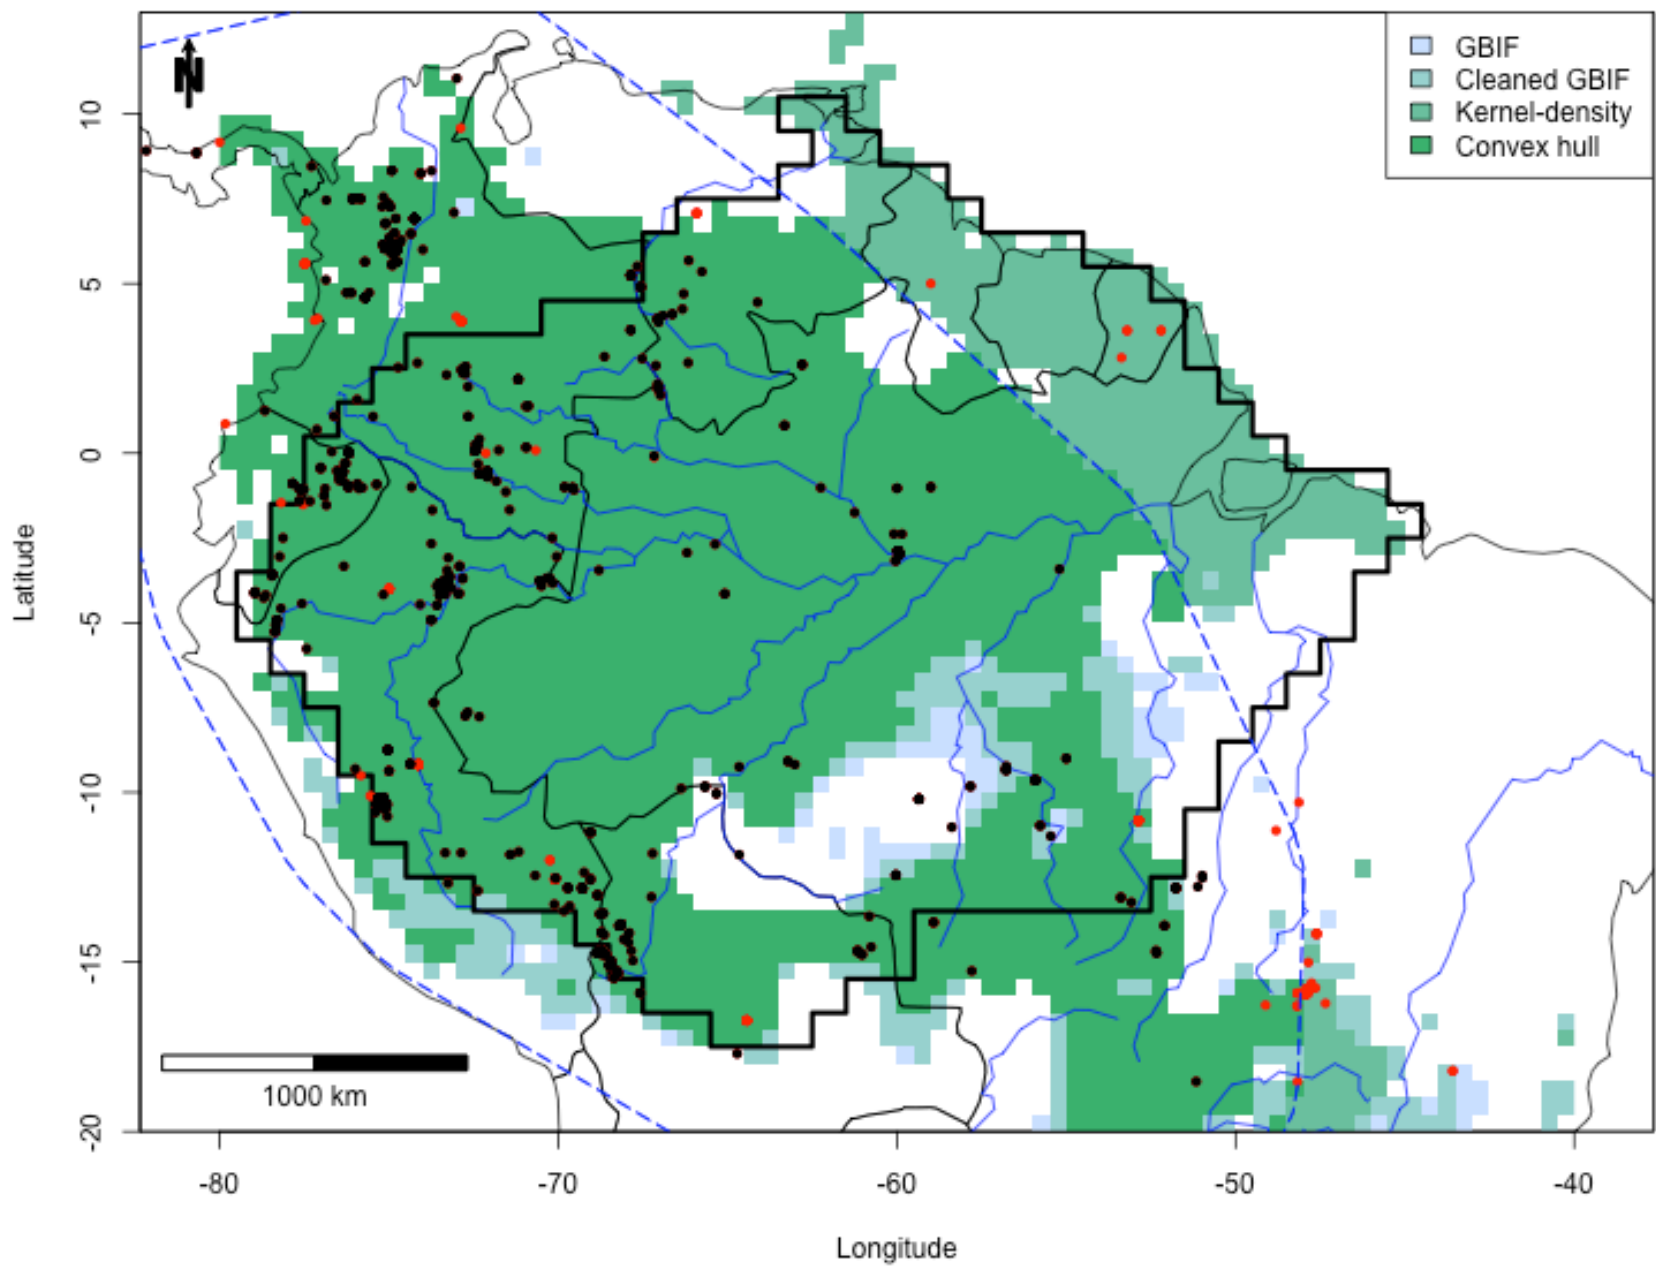

# *Pseudolmedia laevis*

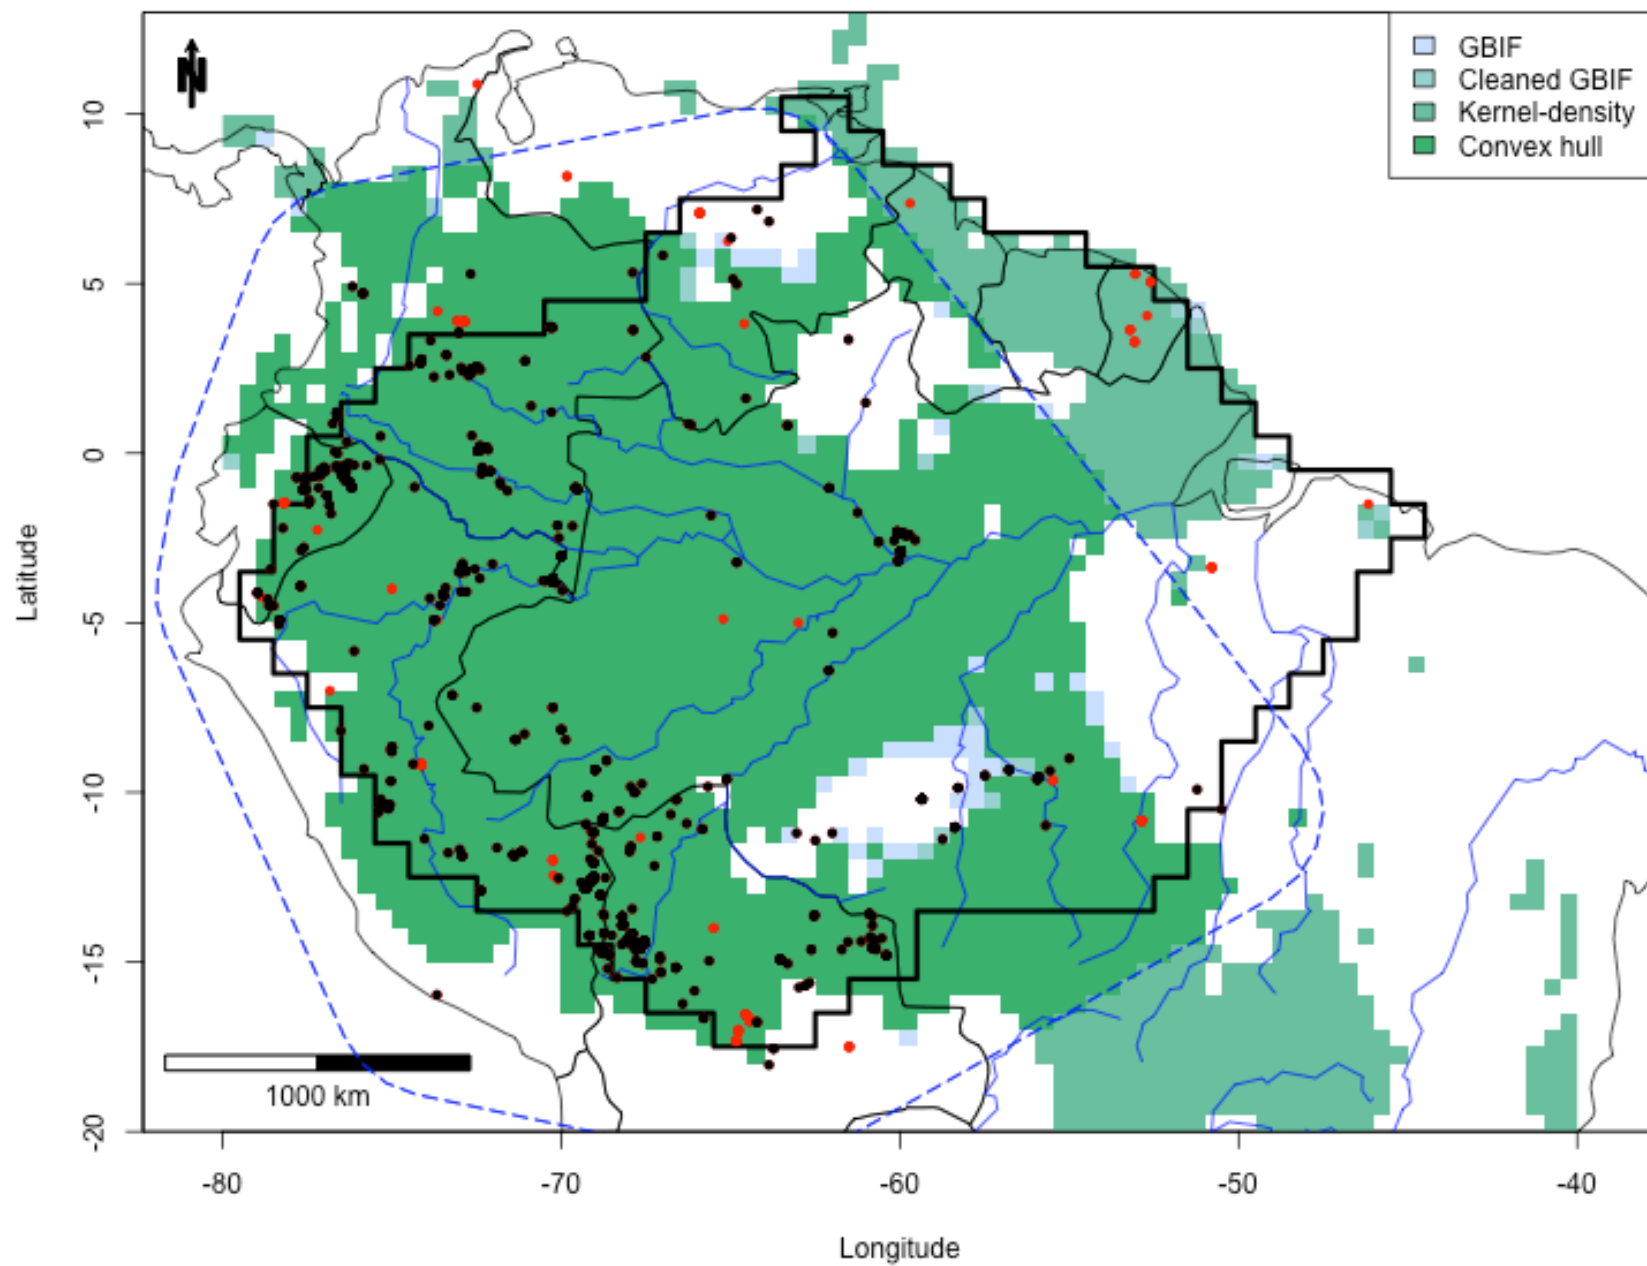

# *Pseudolmedia macrophylla*

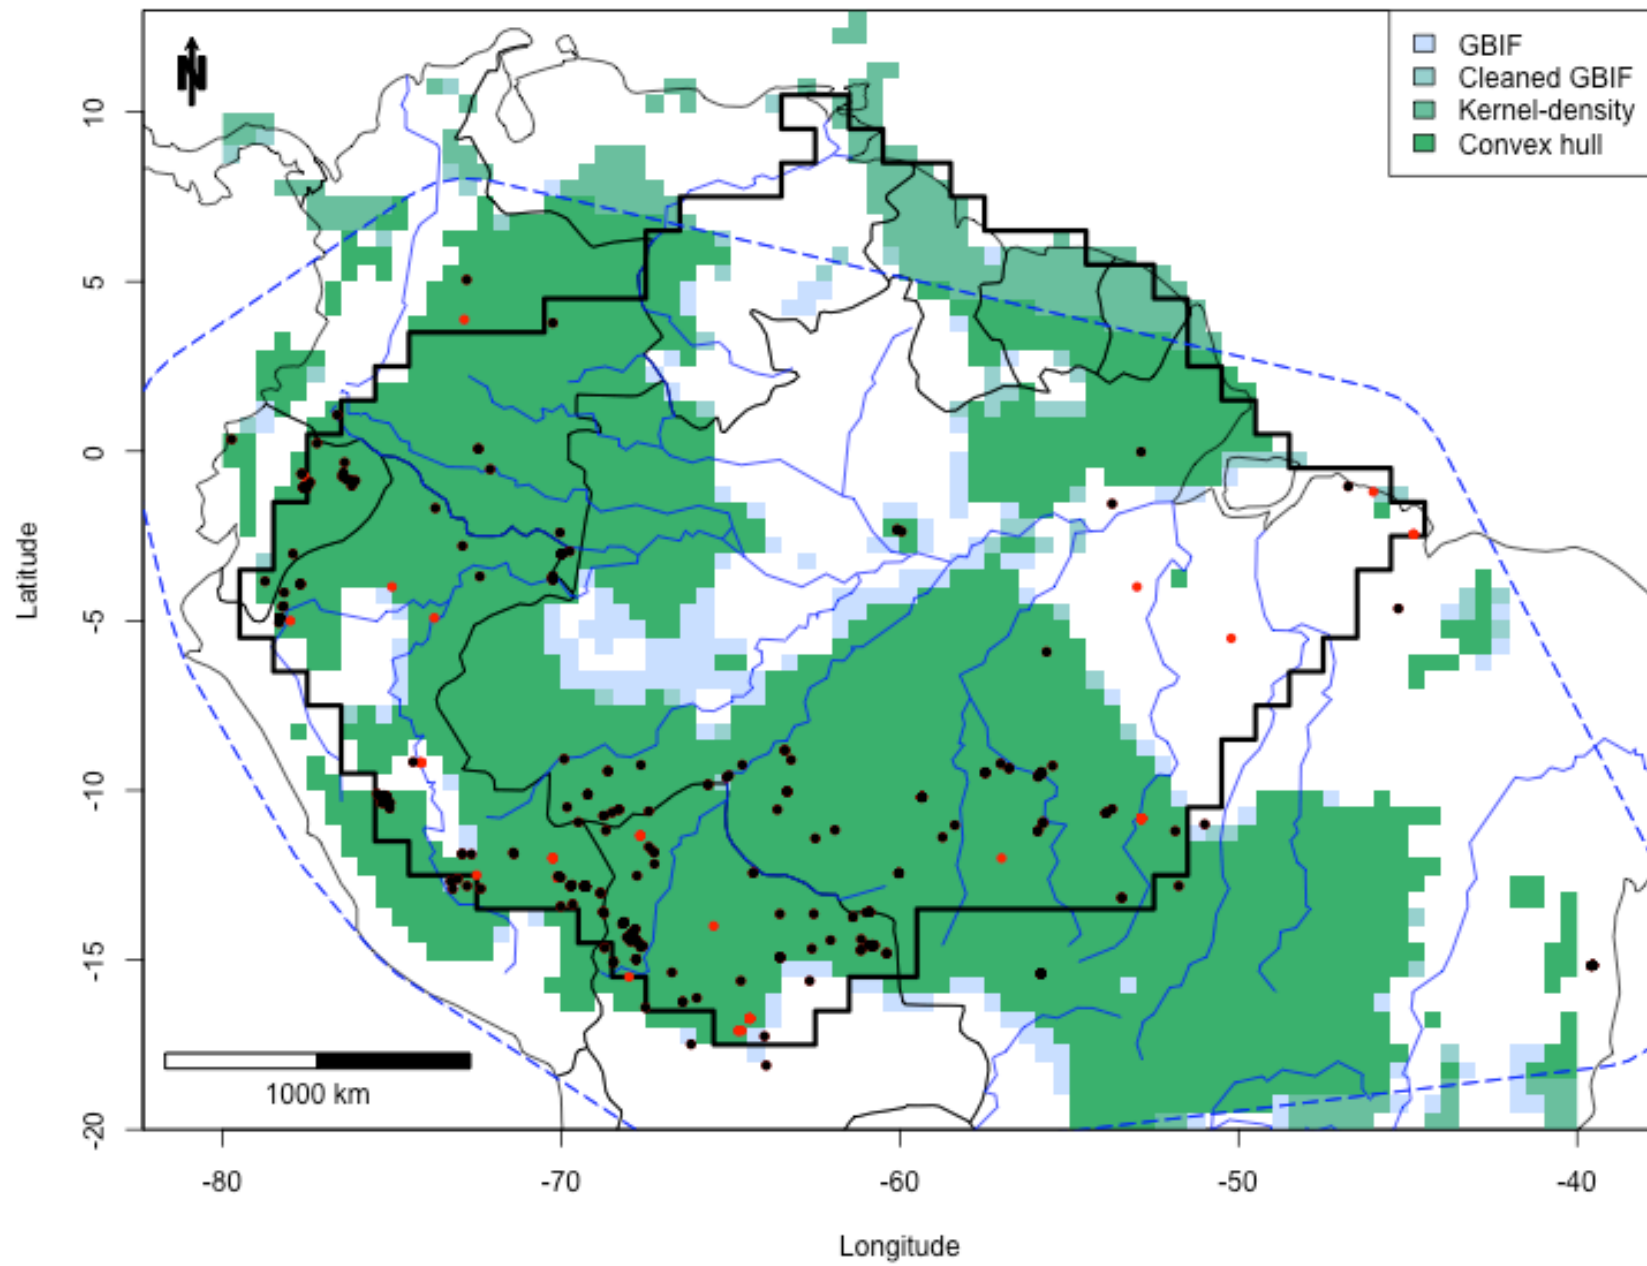

# *Pseudopiptadenia suaveolens*

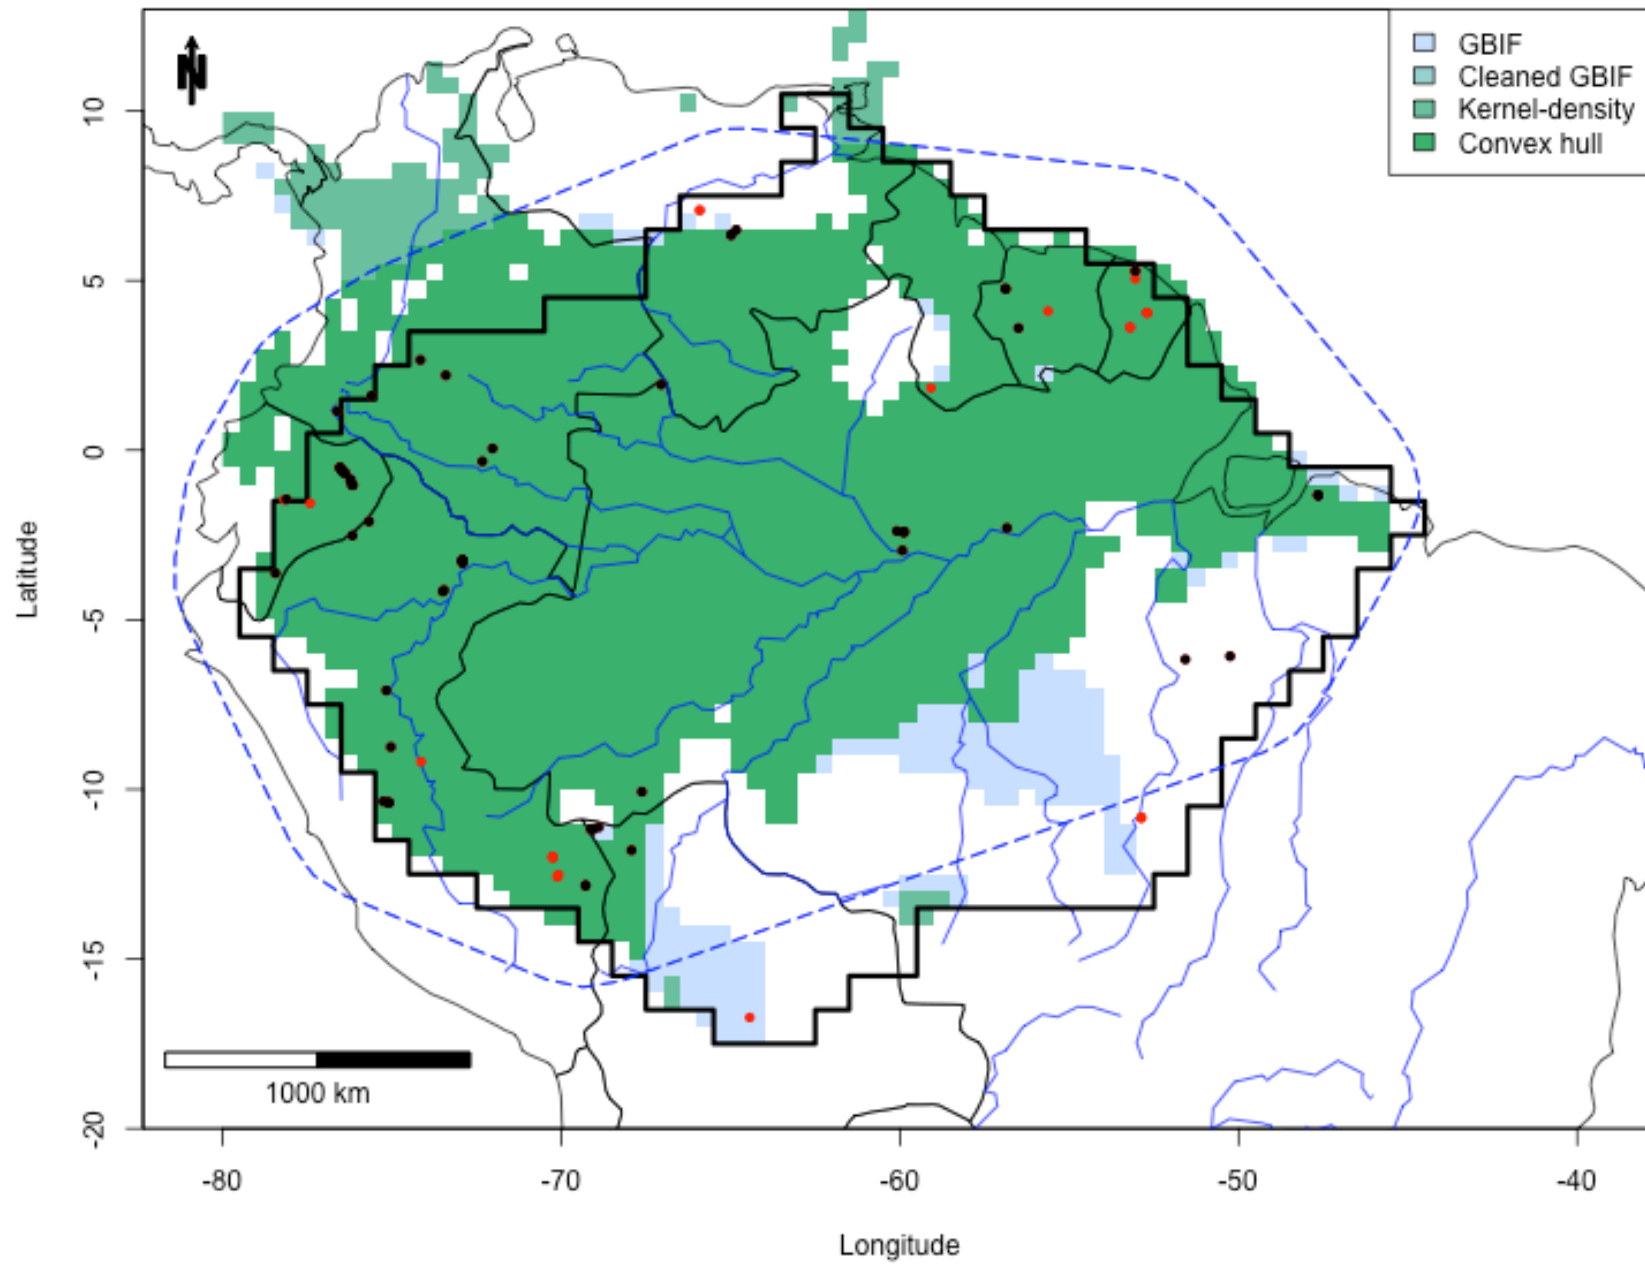

# Pterocarpus amazonum

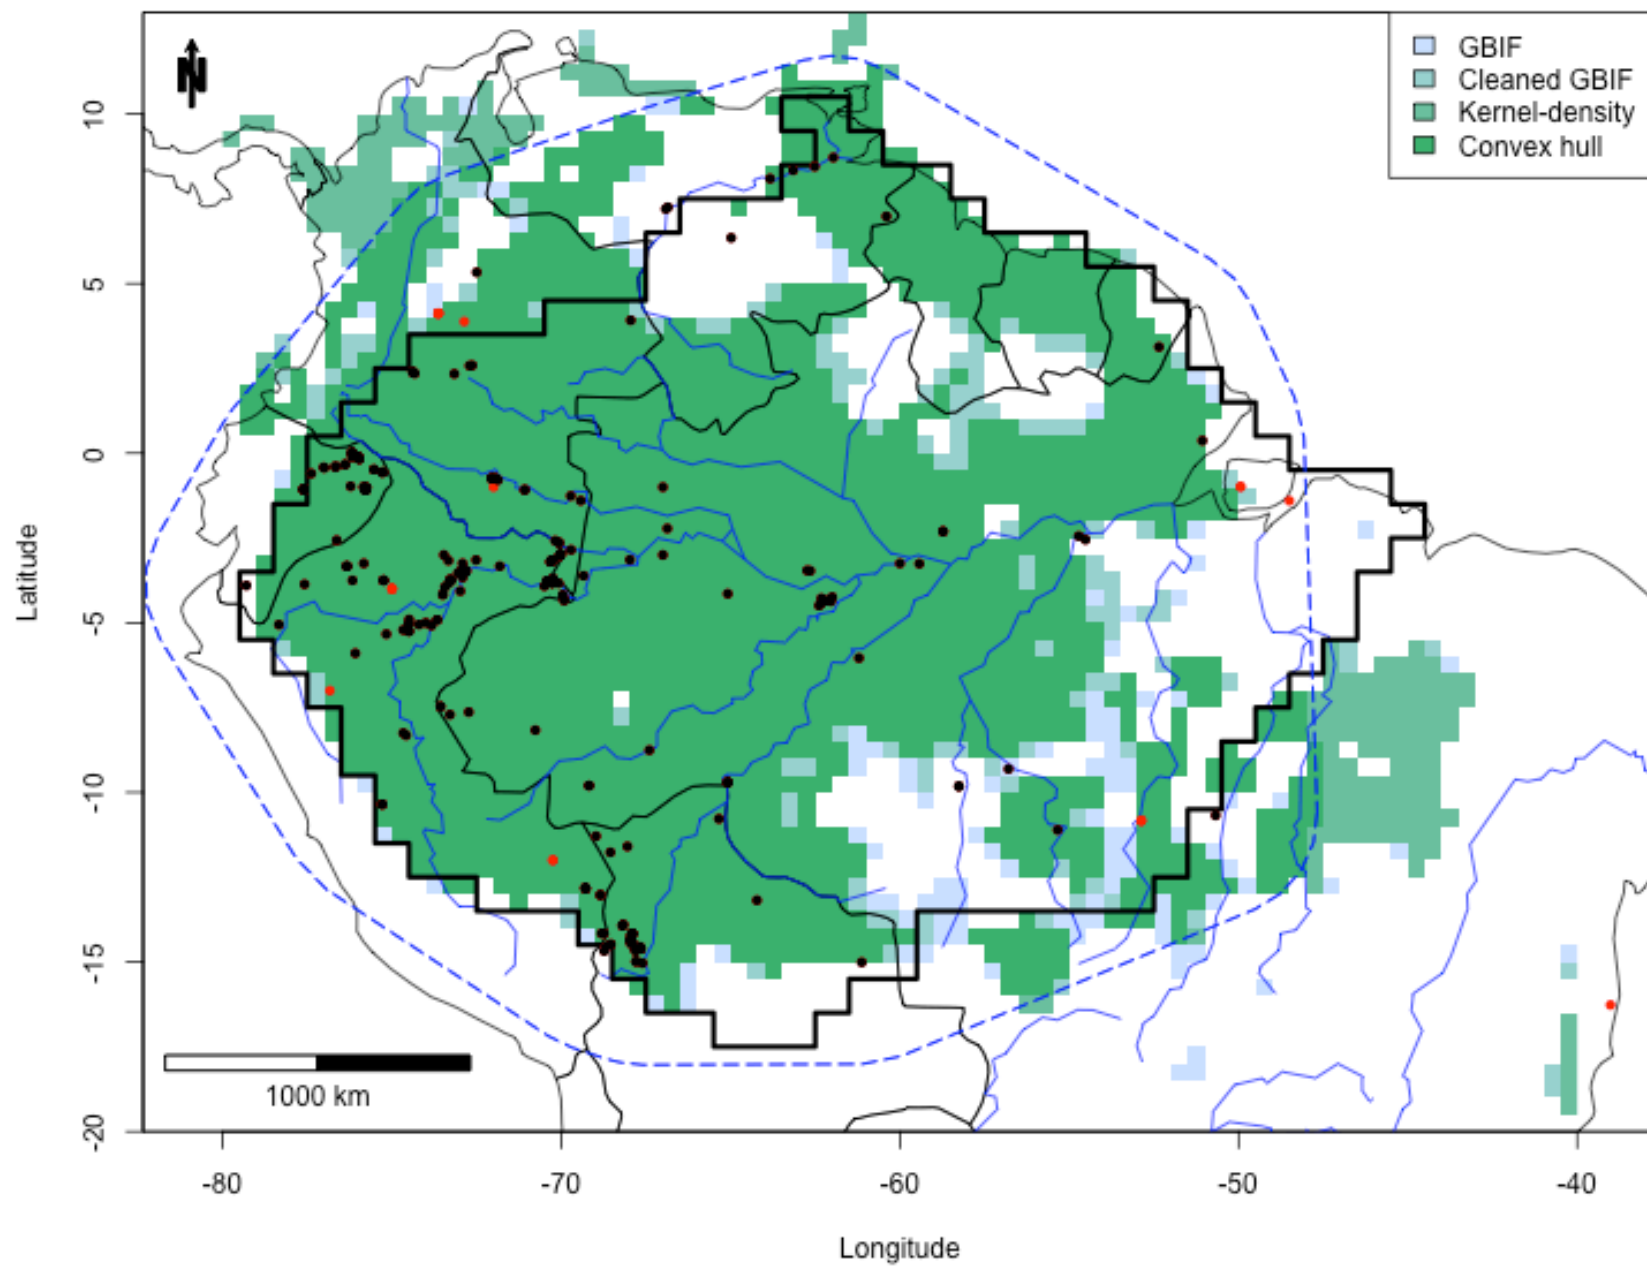

# Pterocarpus rohrii

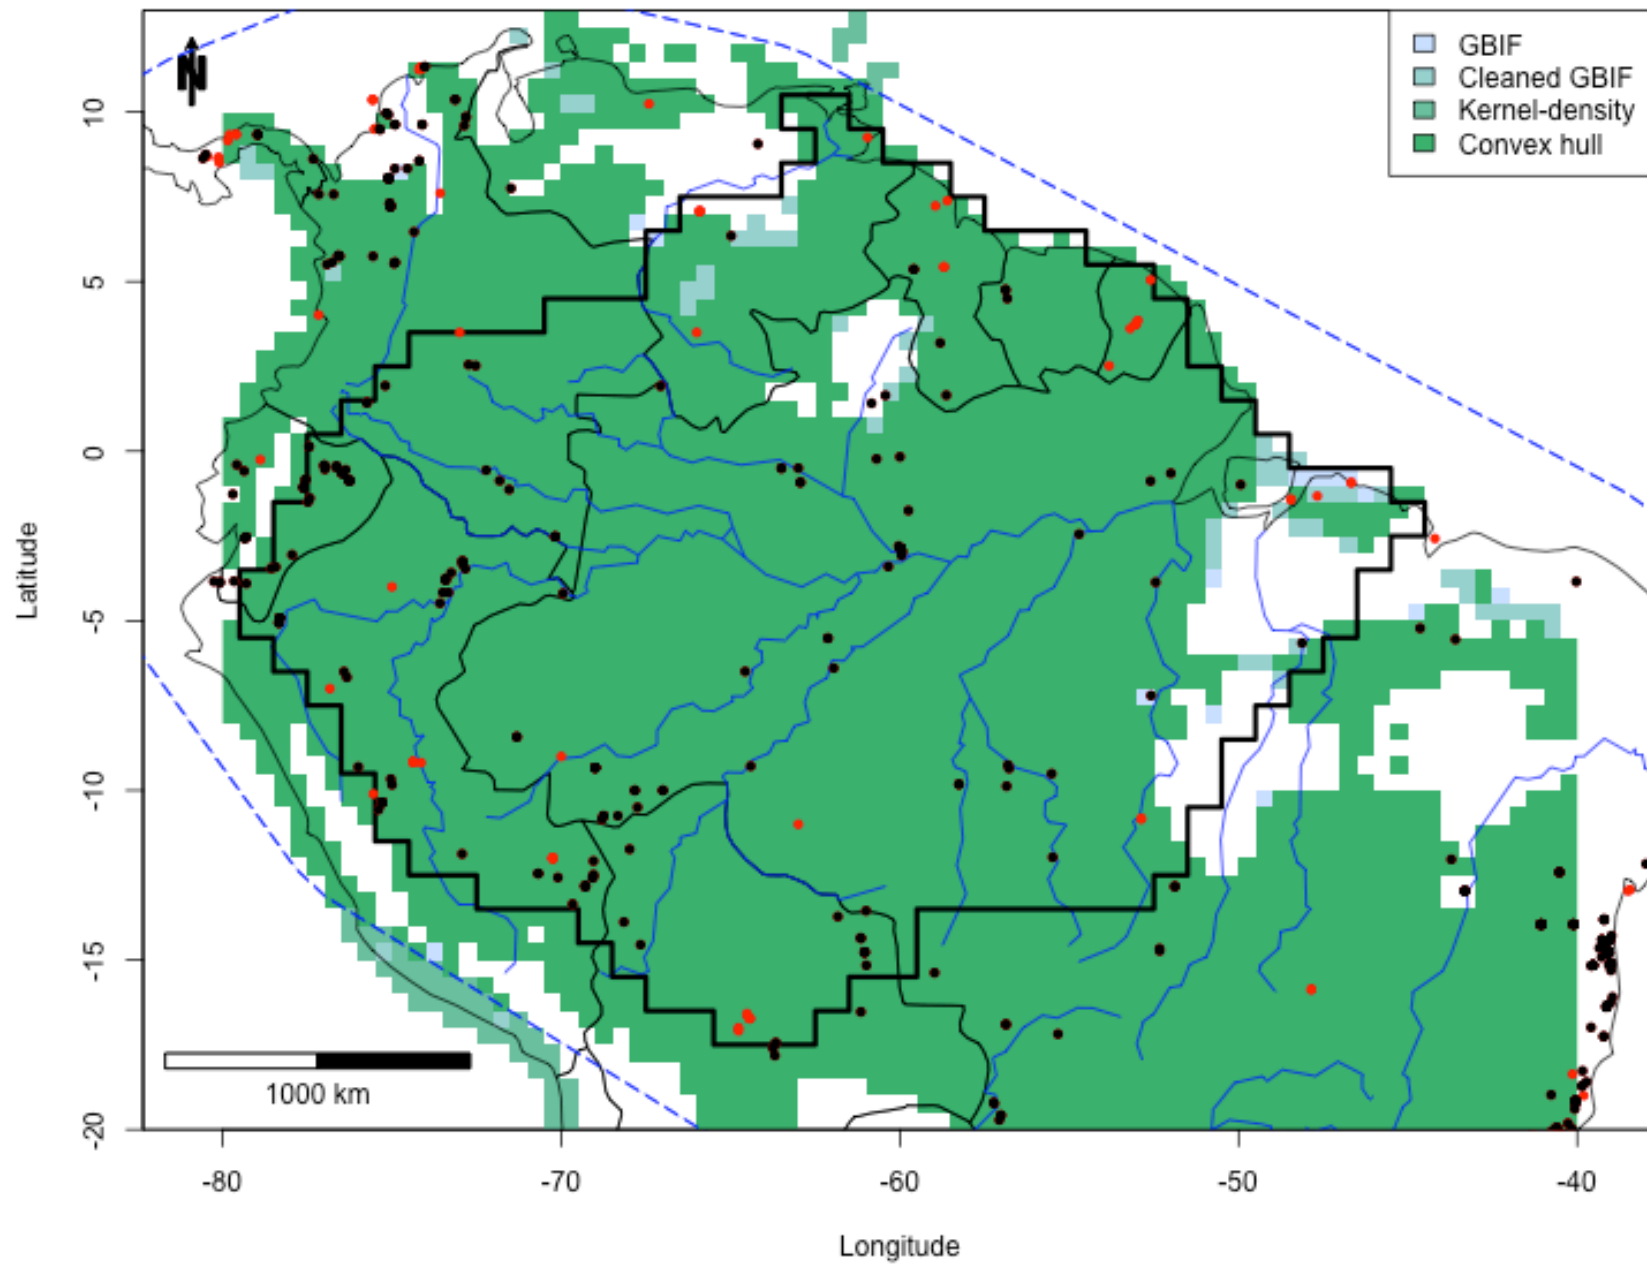



*Pterocarpus santalinoides*

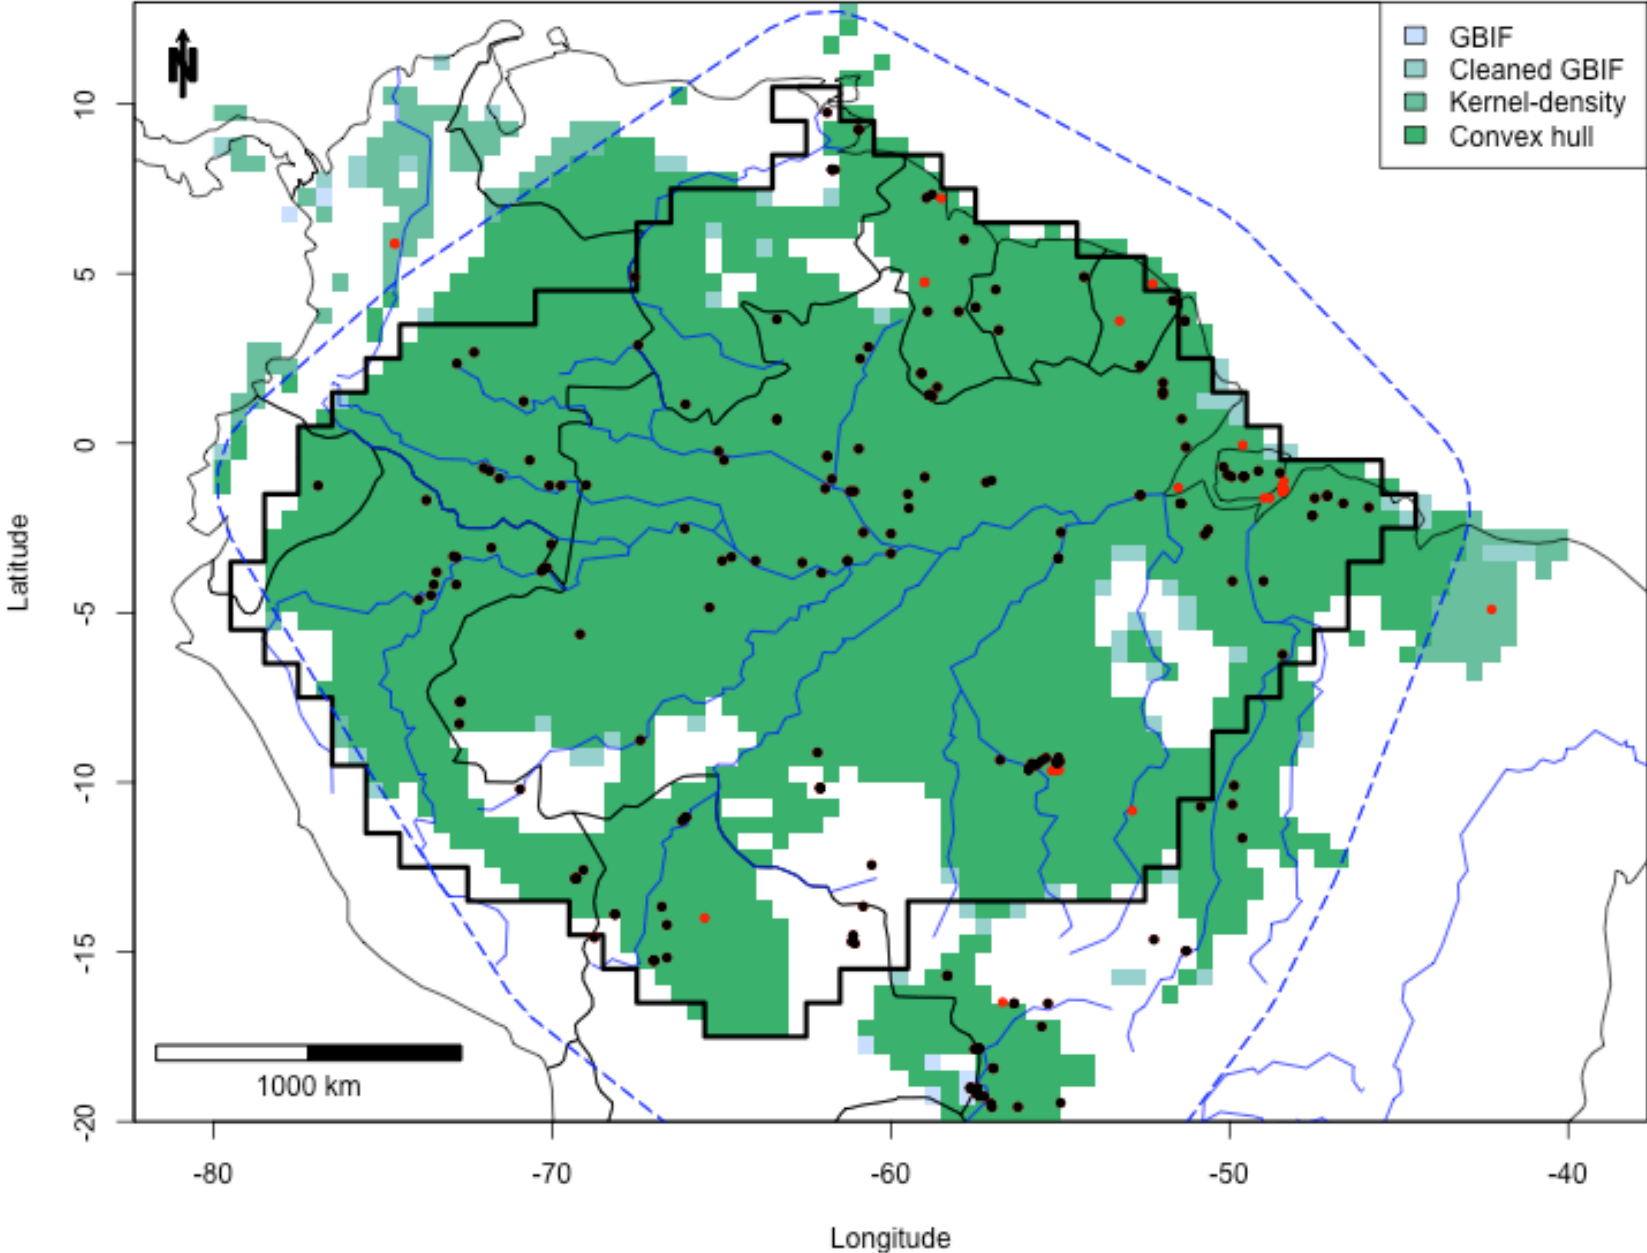

# Qualea paraensis

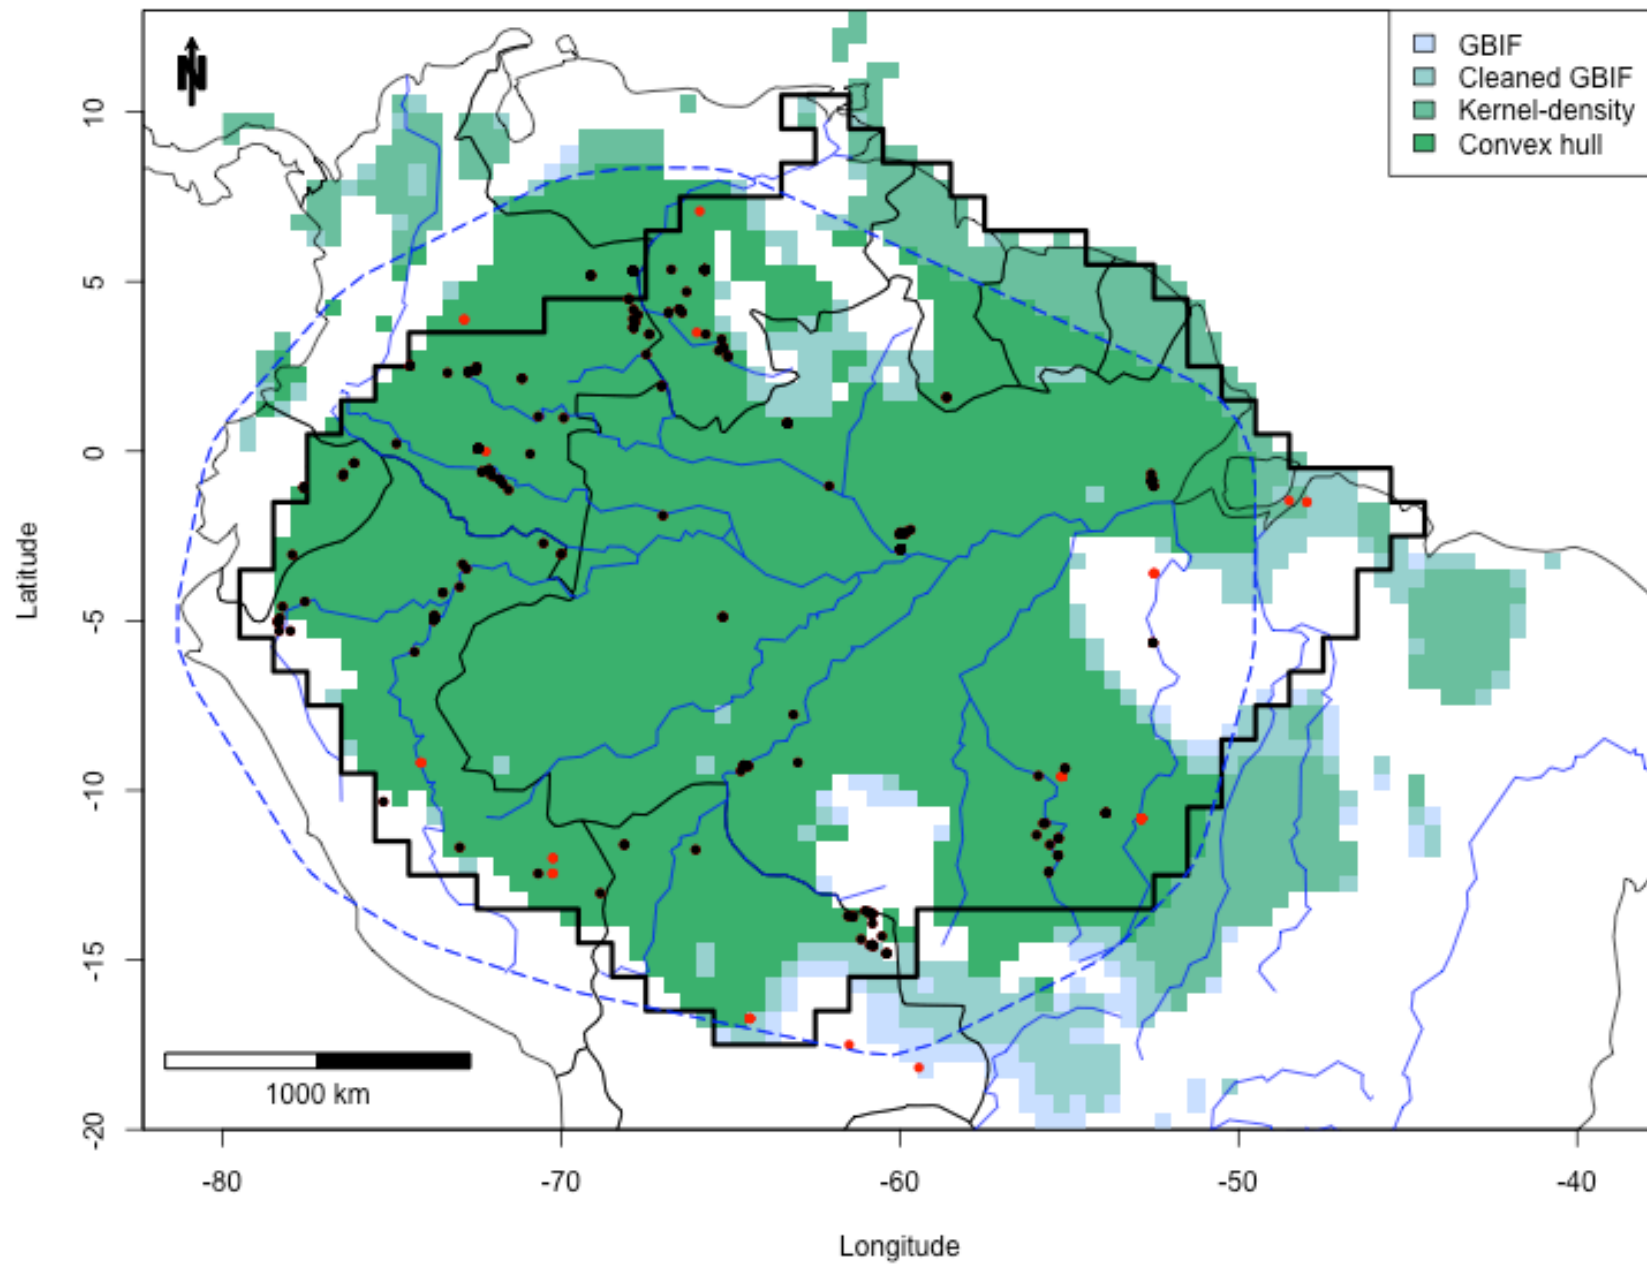

# Quararibea guianensis

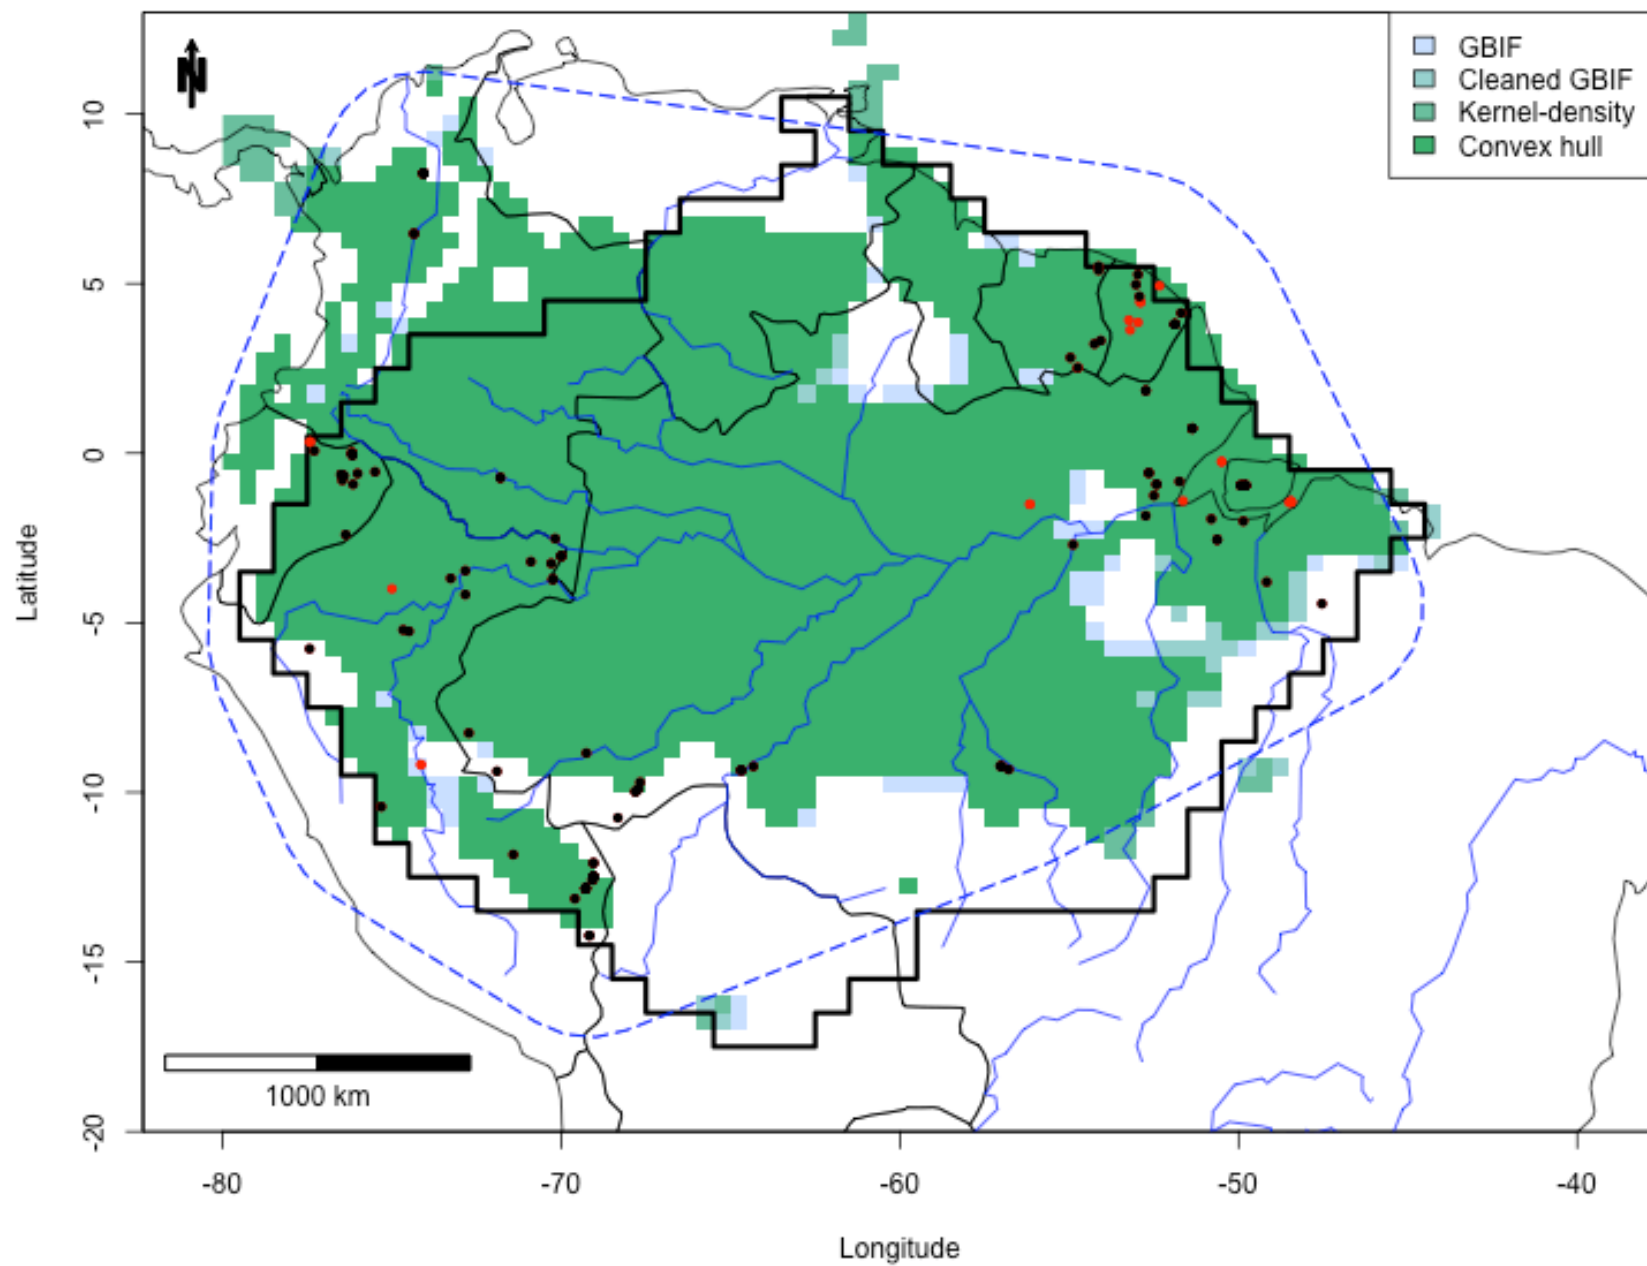

# Quararibea wittii

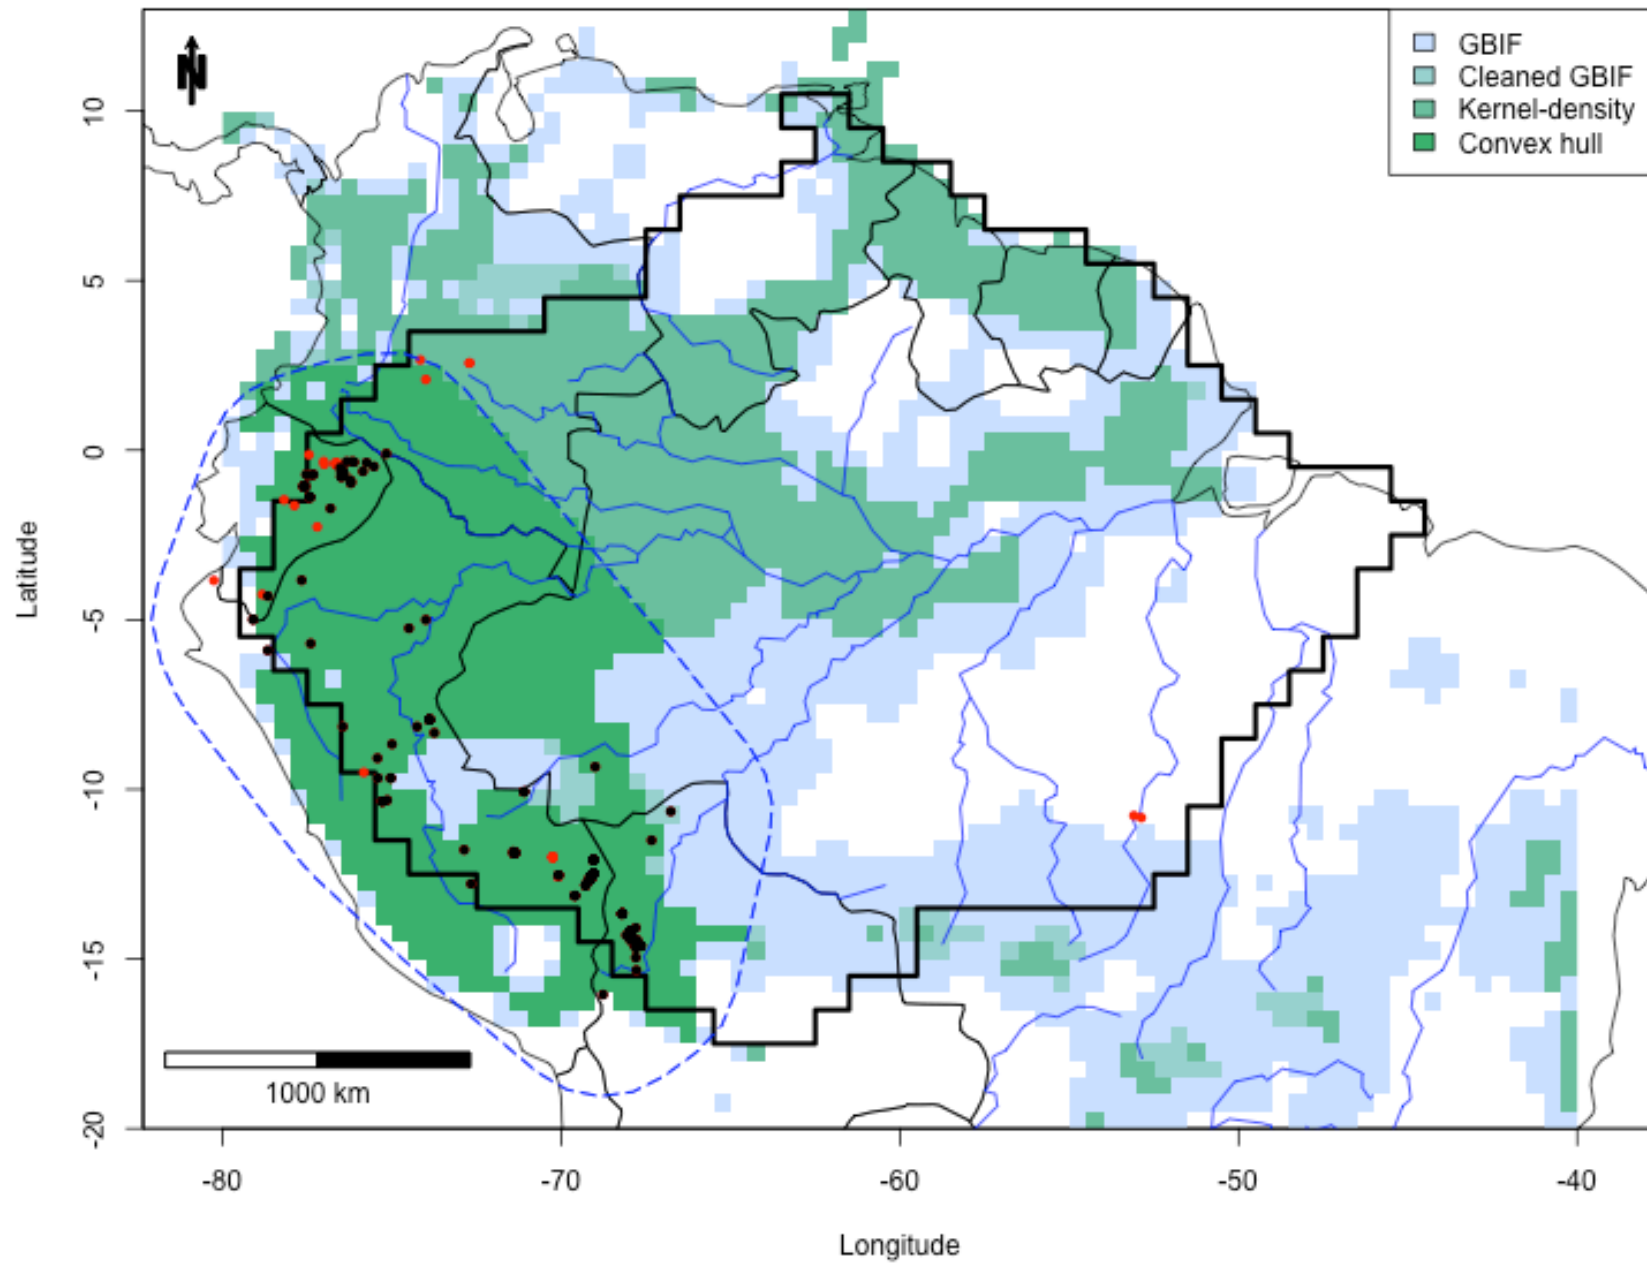

# Rinorea guianensis

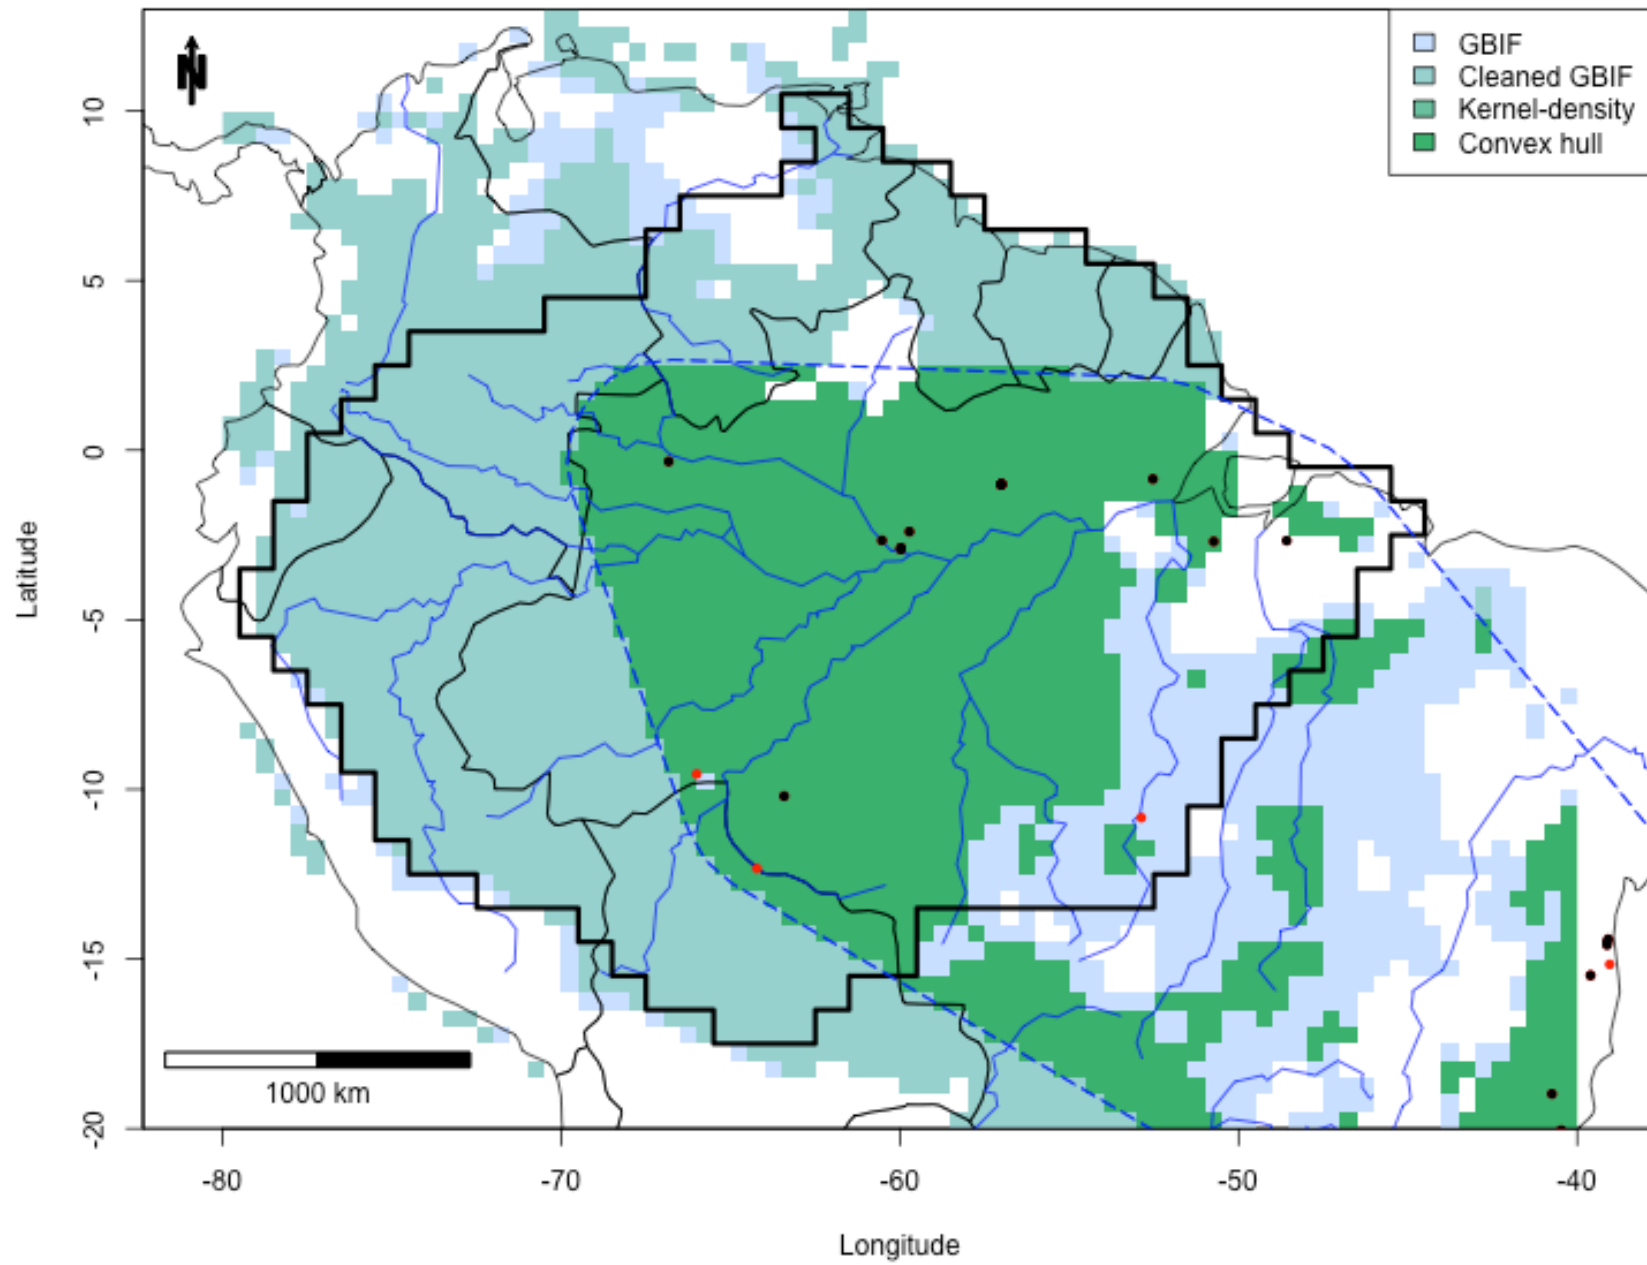

# Rinorea racemosa

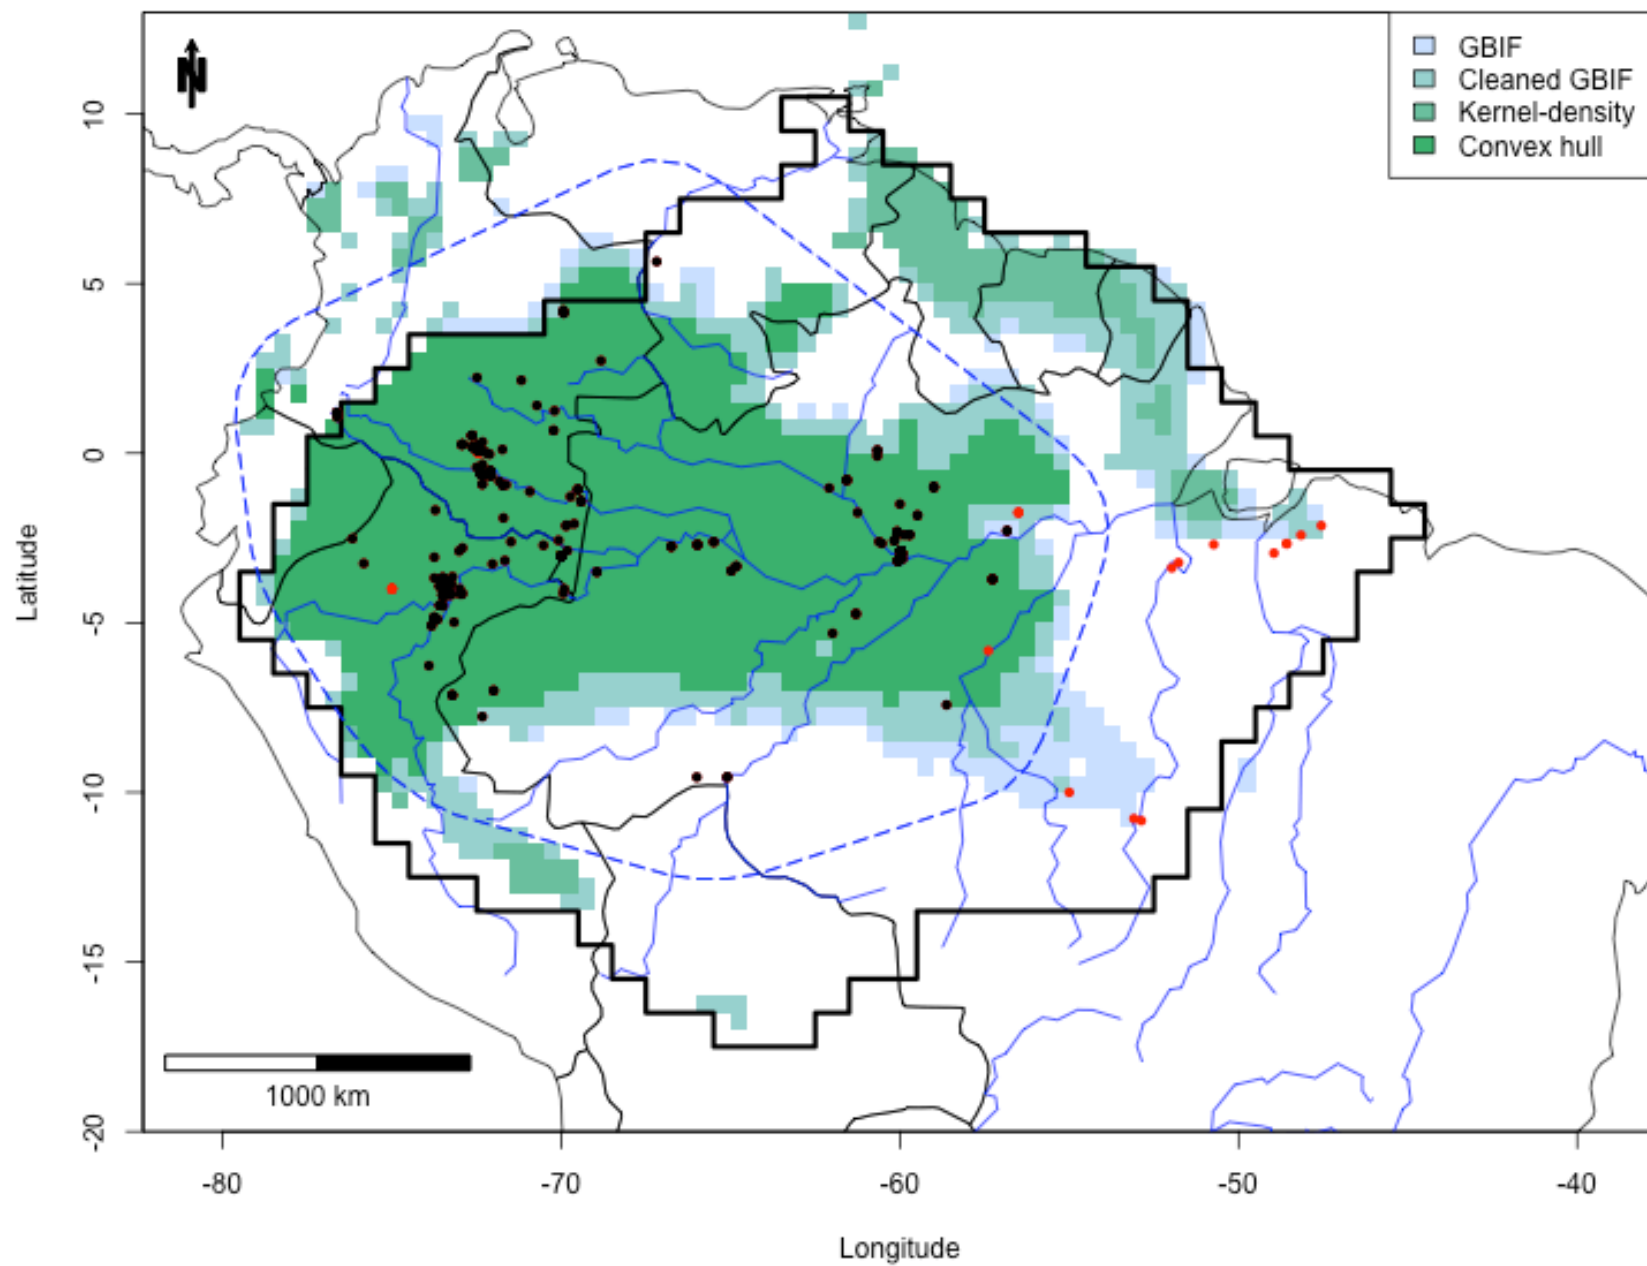

# Rinoreaocarpus ulei

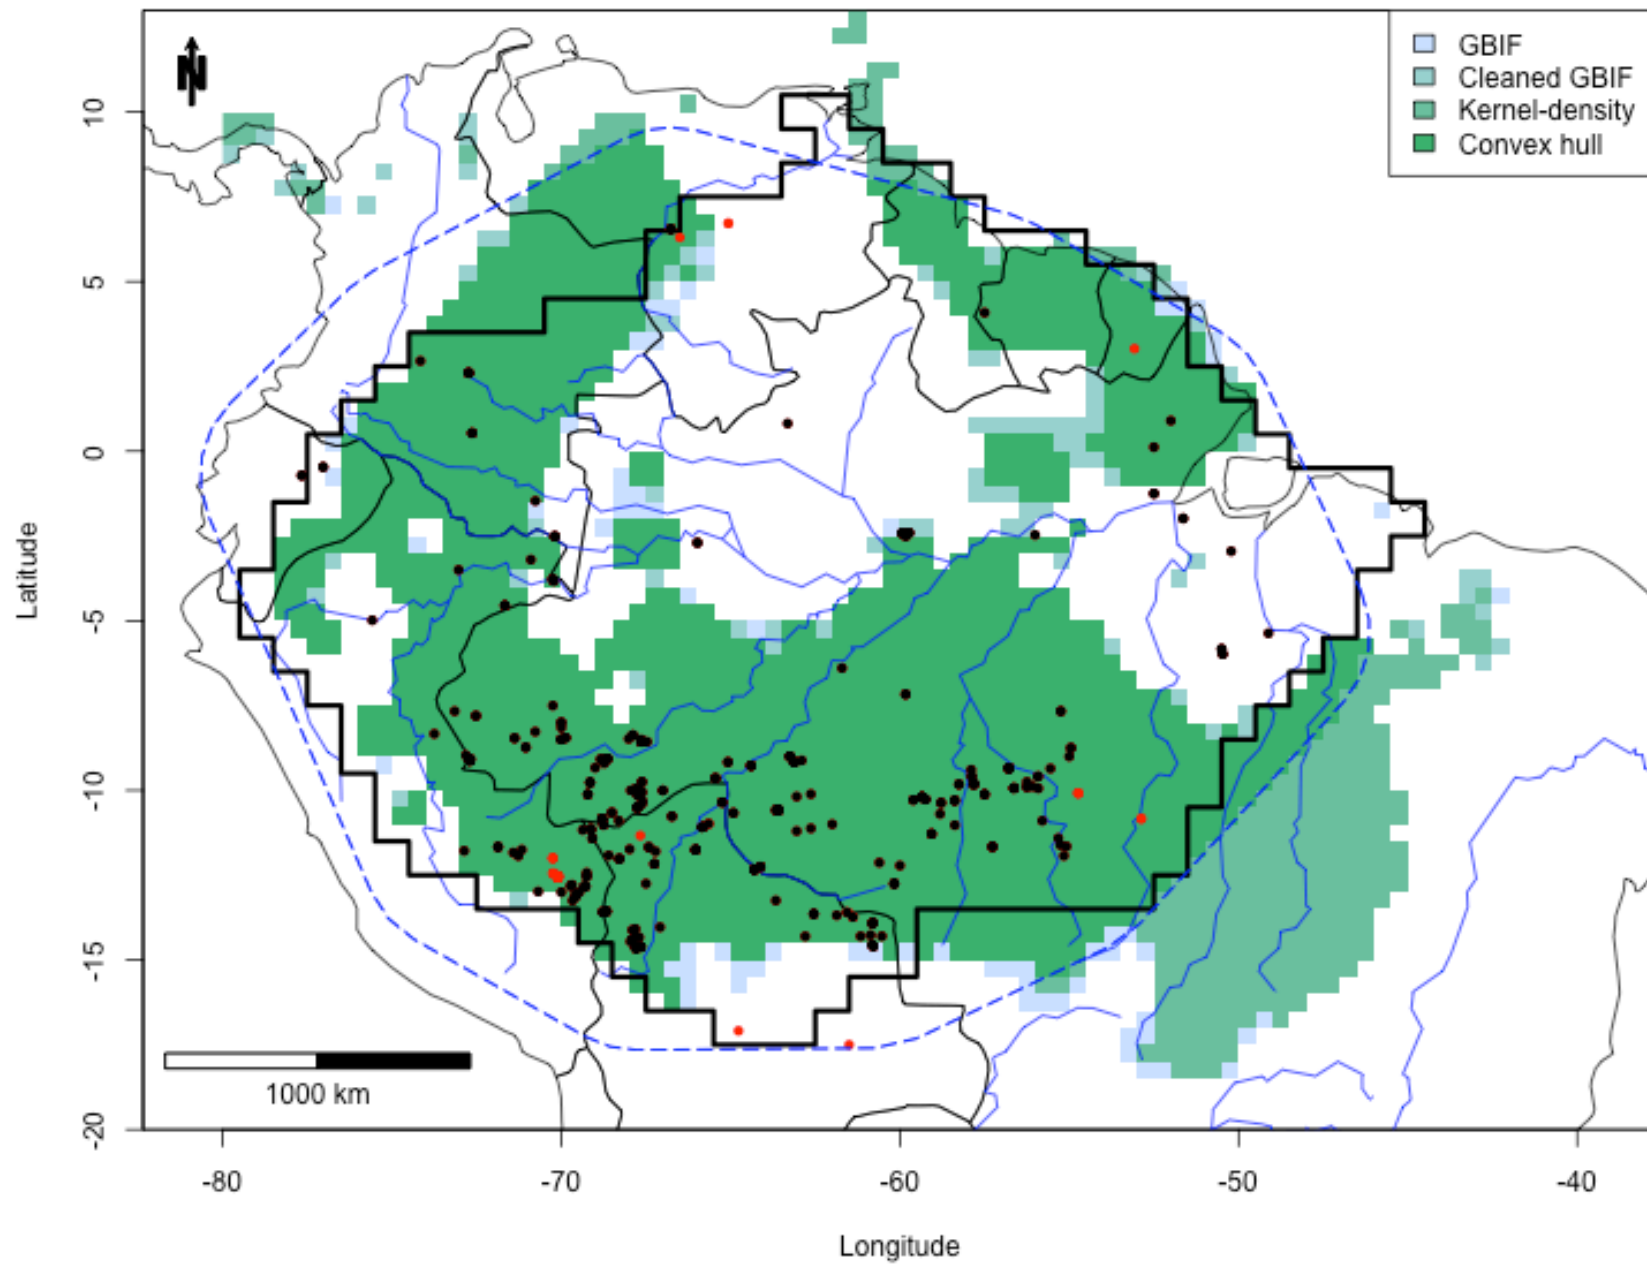



# Sacoglottis guianensis

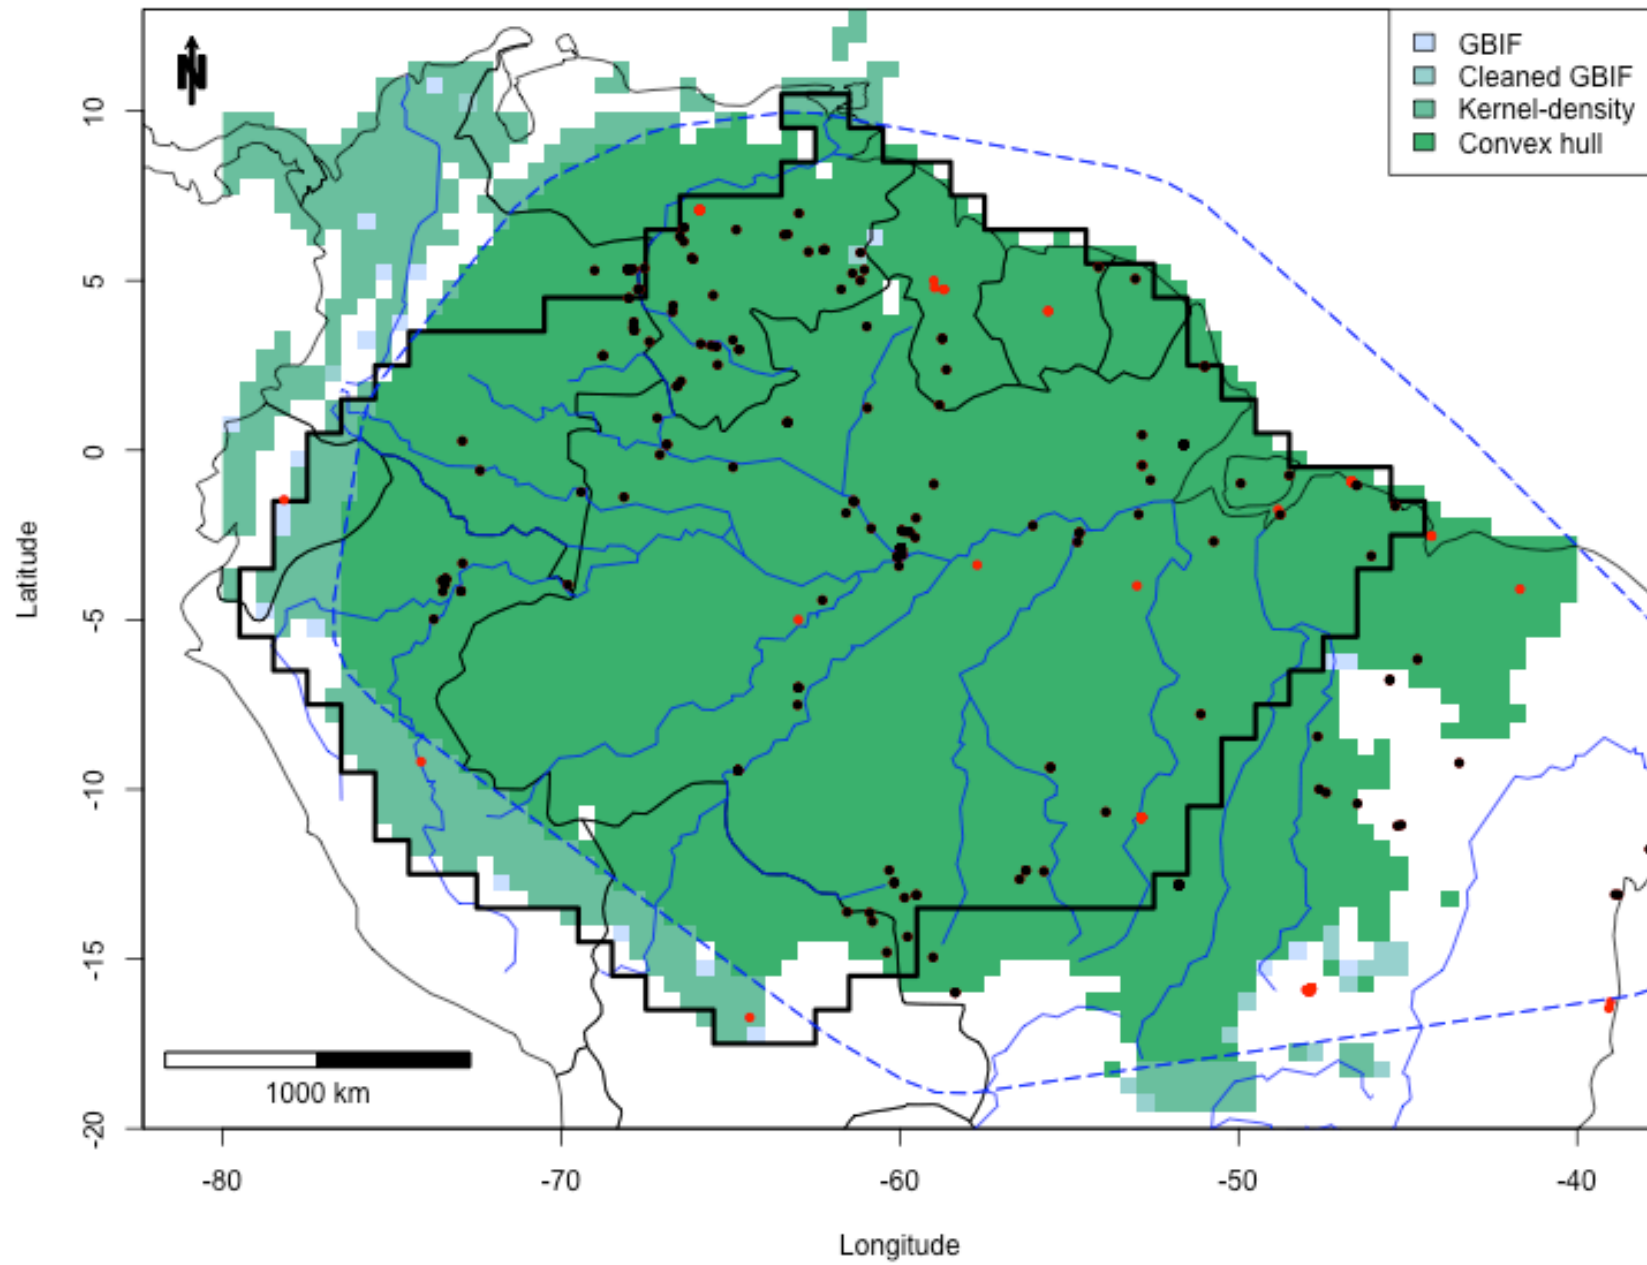

# Sacoglottis mattogrossensis

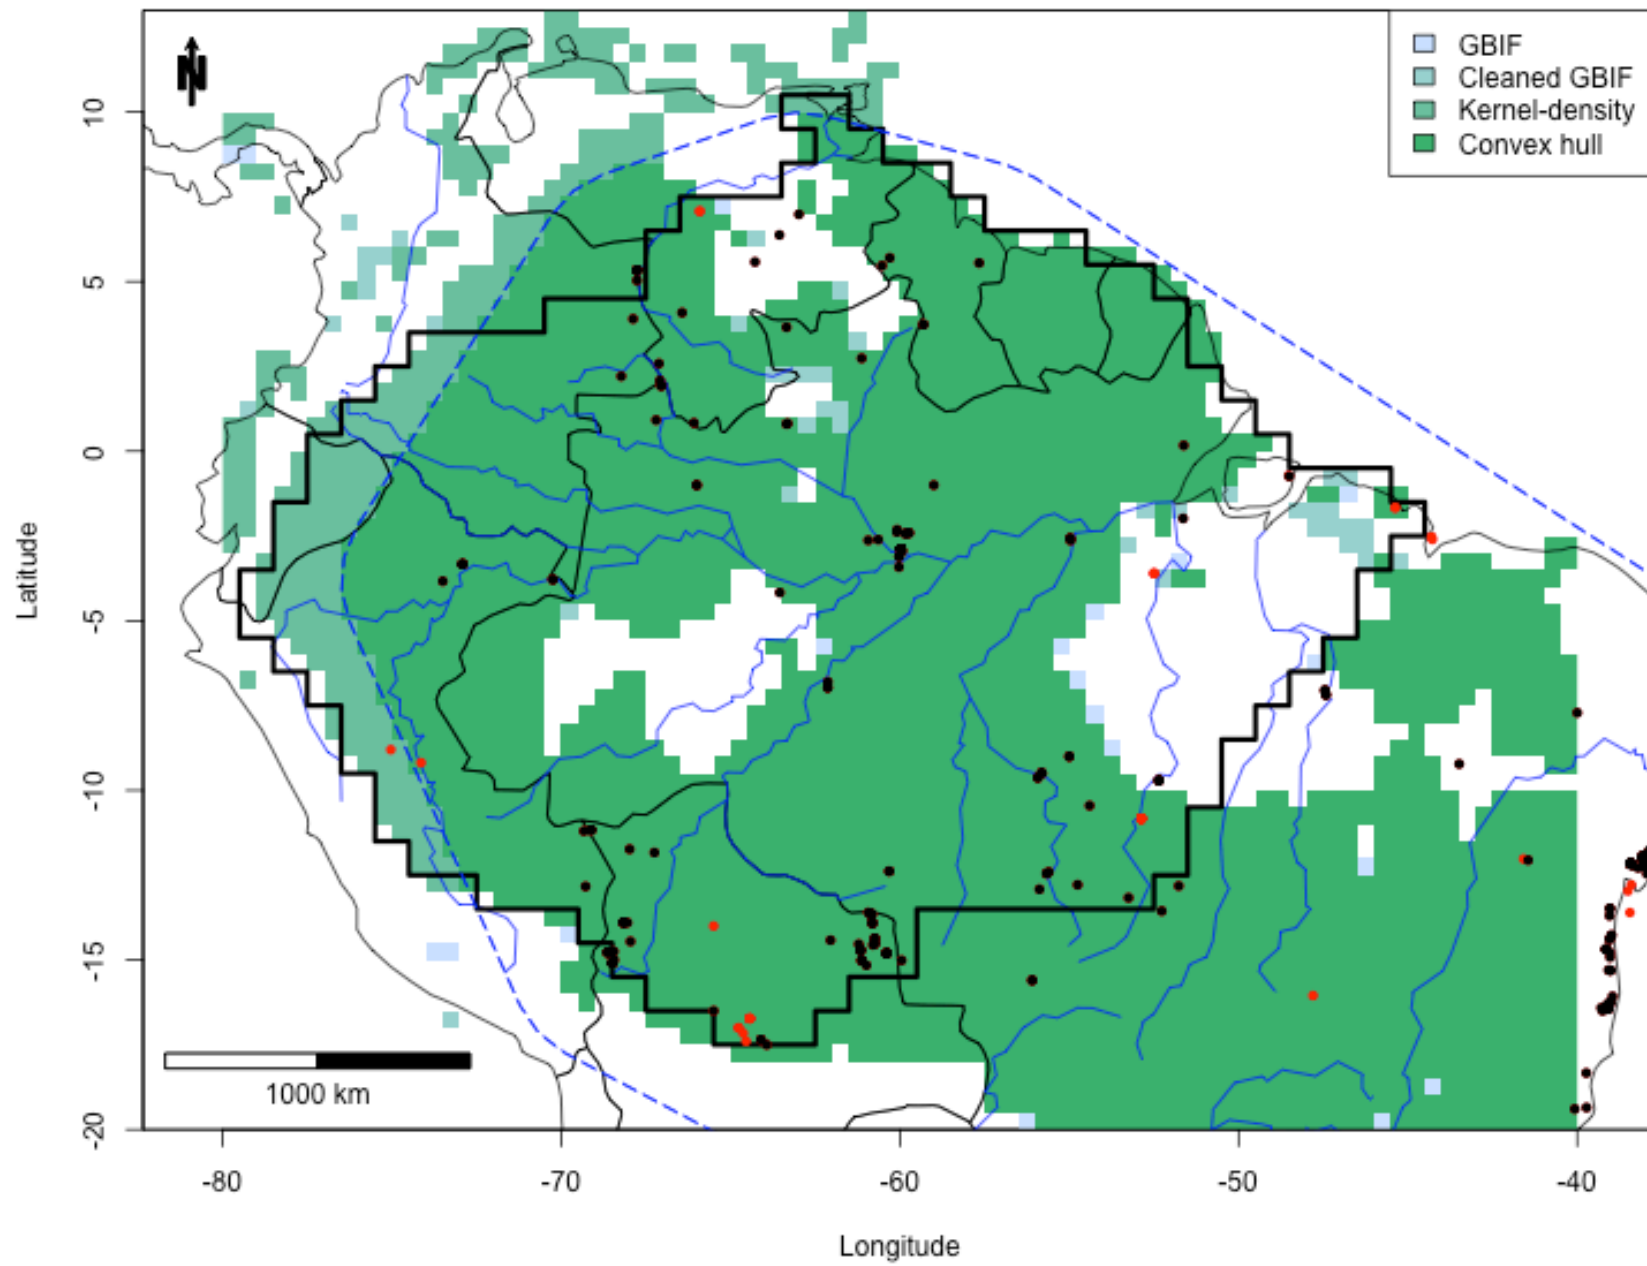

# Sagotia brachysepala

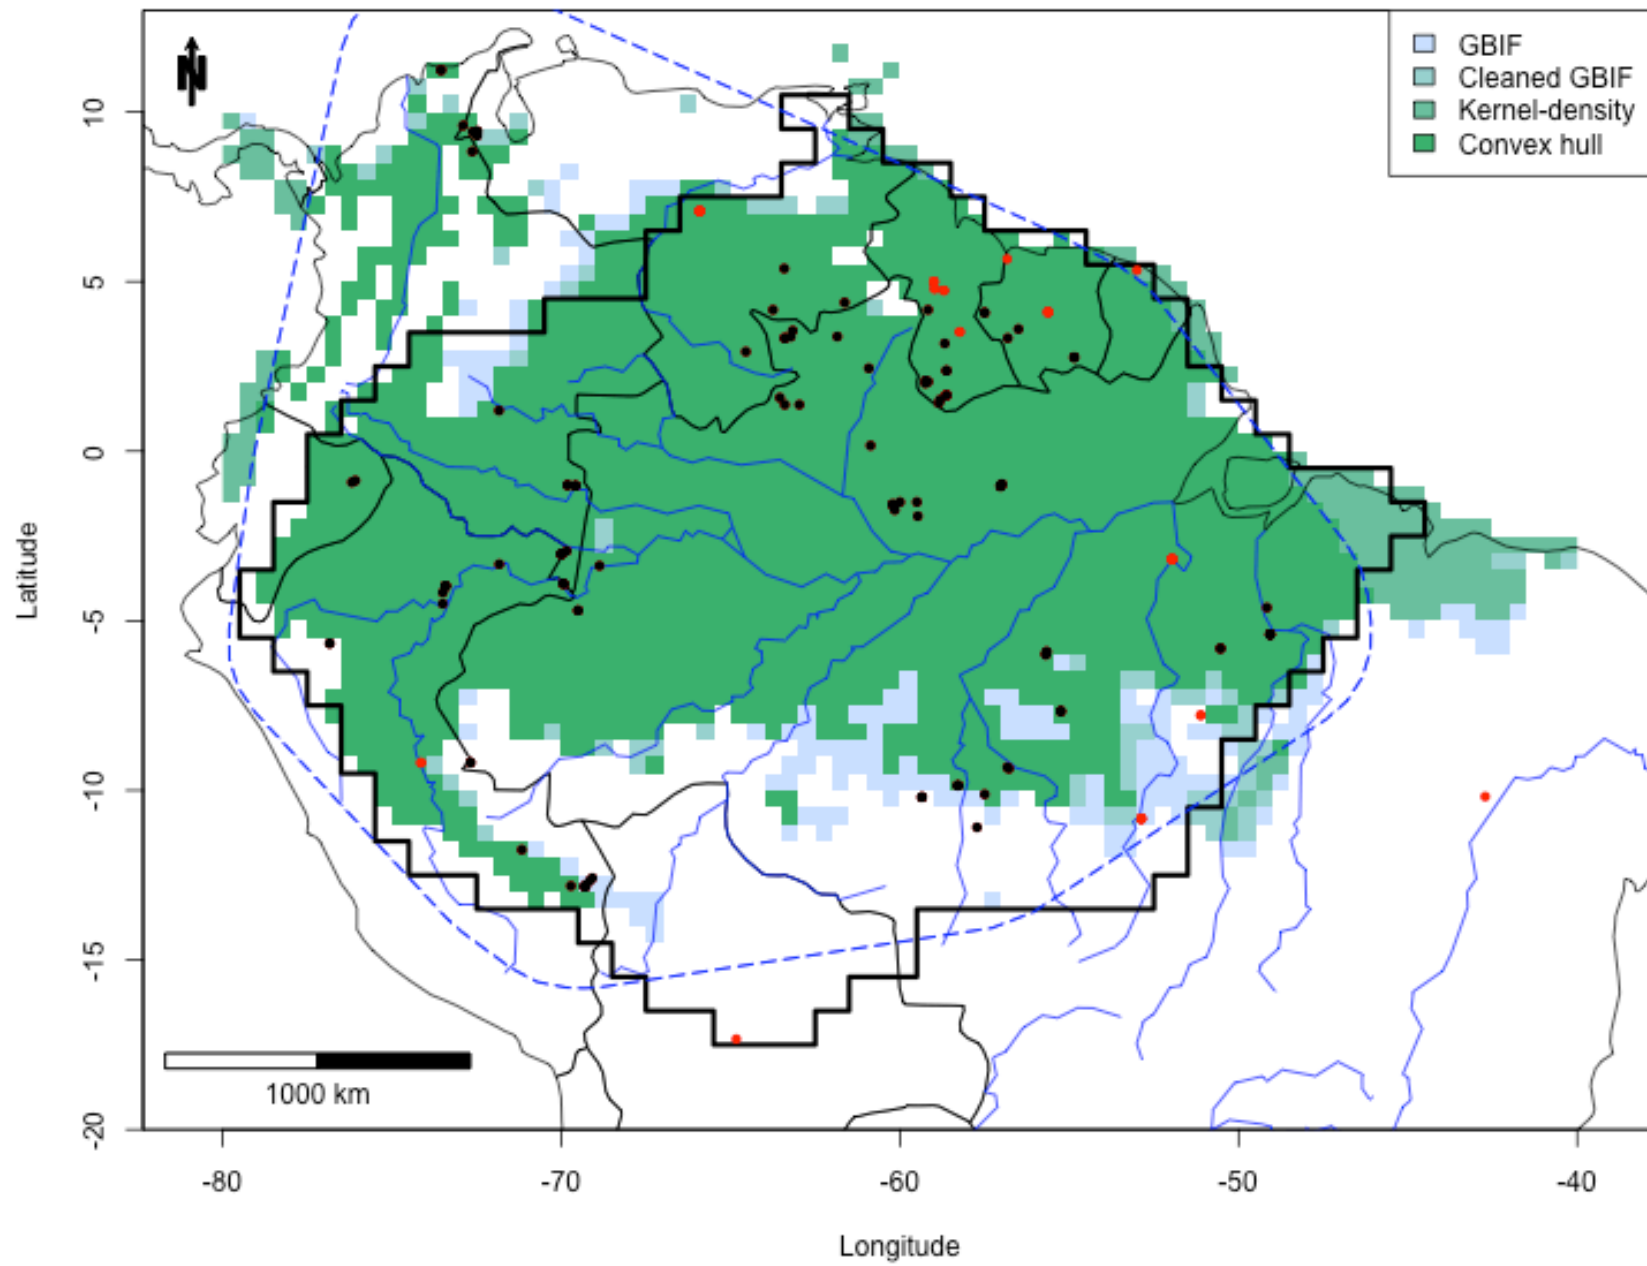

# Sagotia racemosa

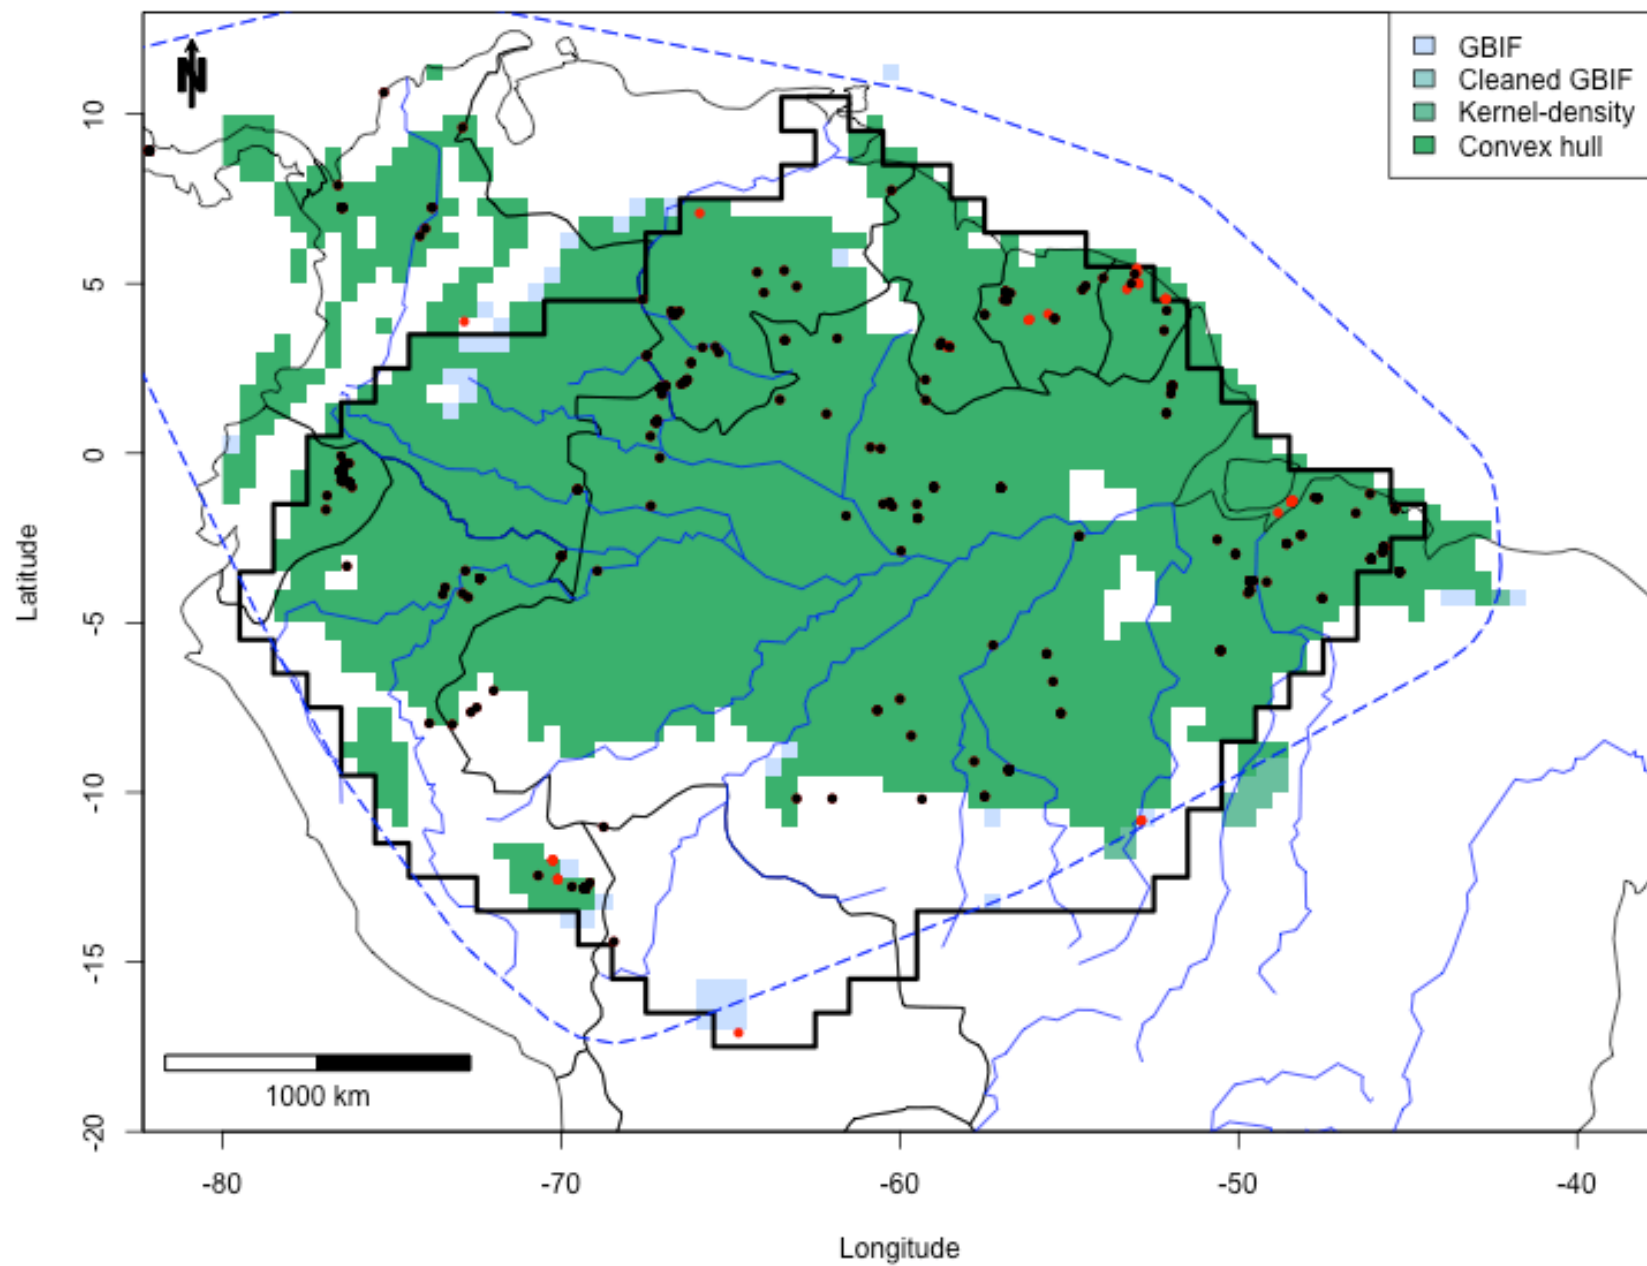

### Scleronema micranthum

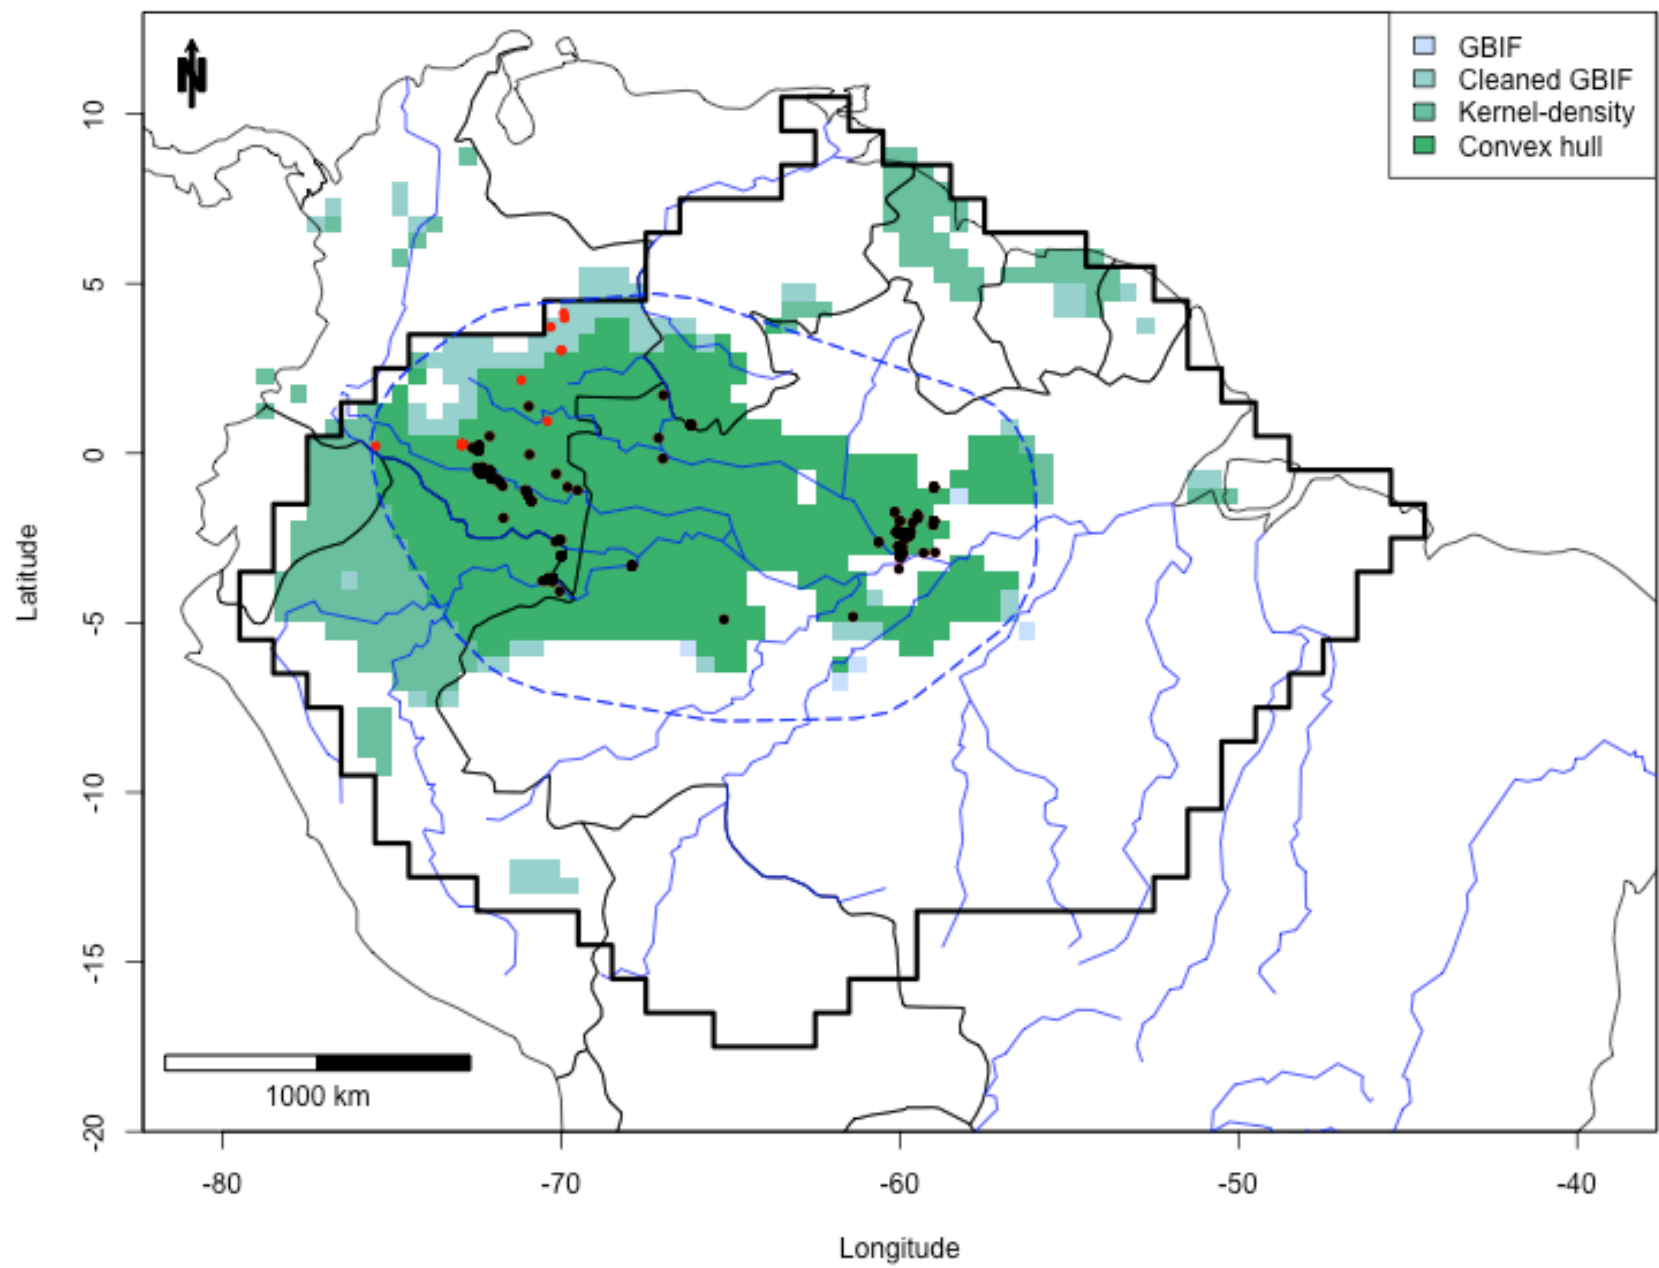

### Senefeldera inclinata

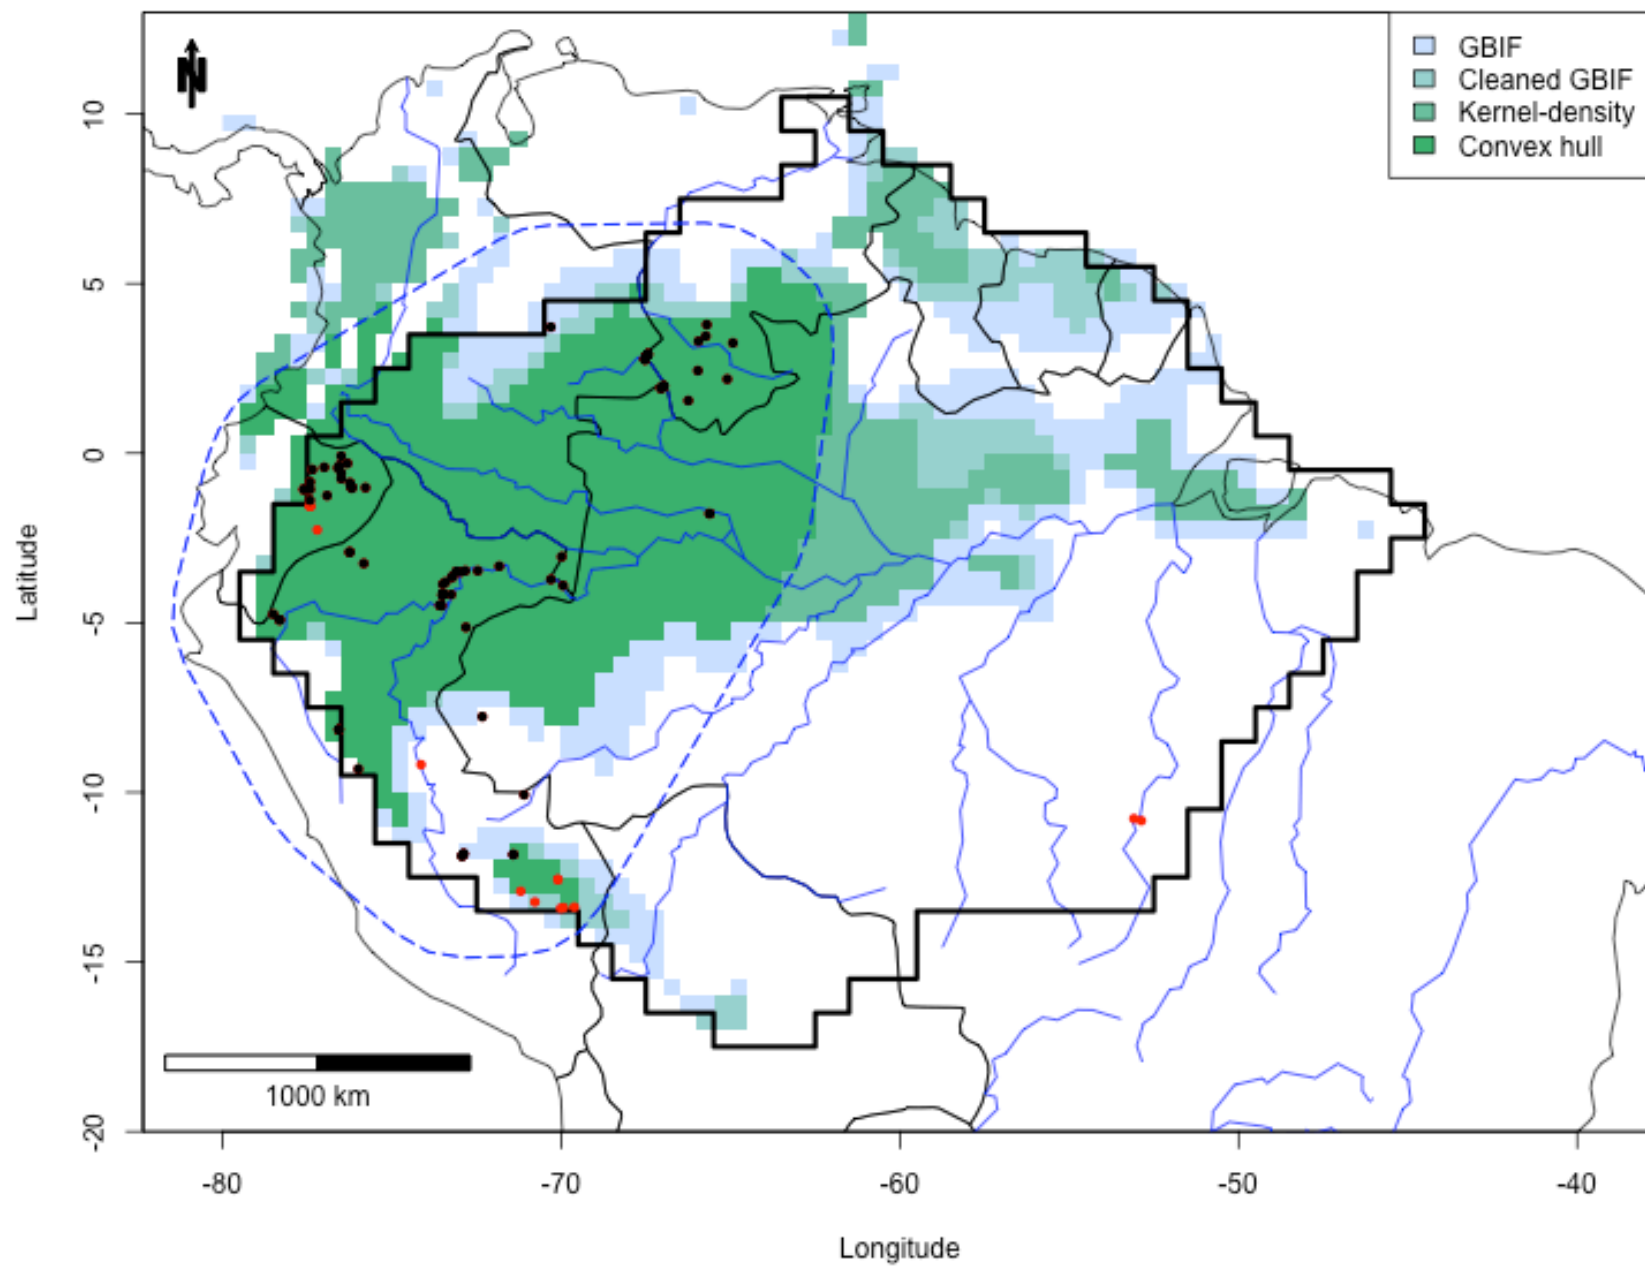

Simarouba amara

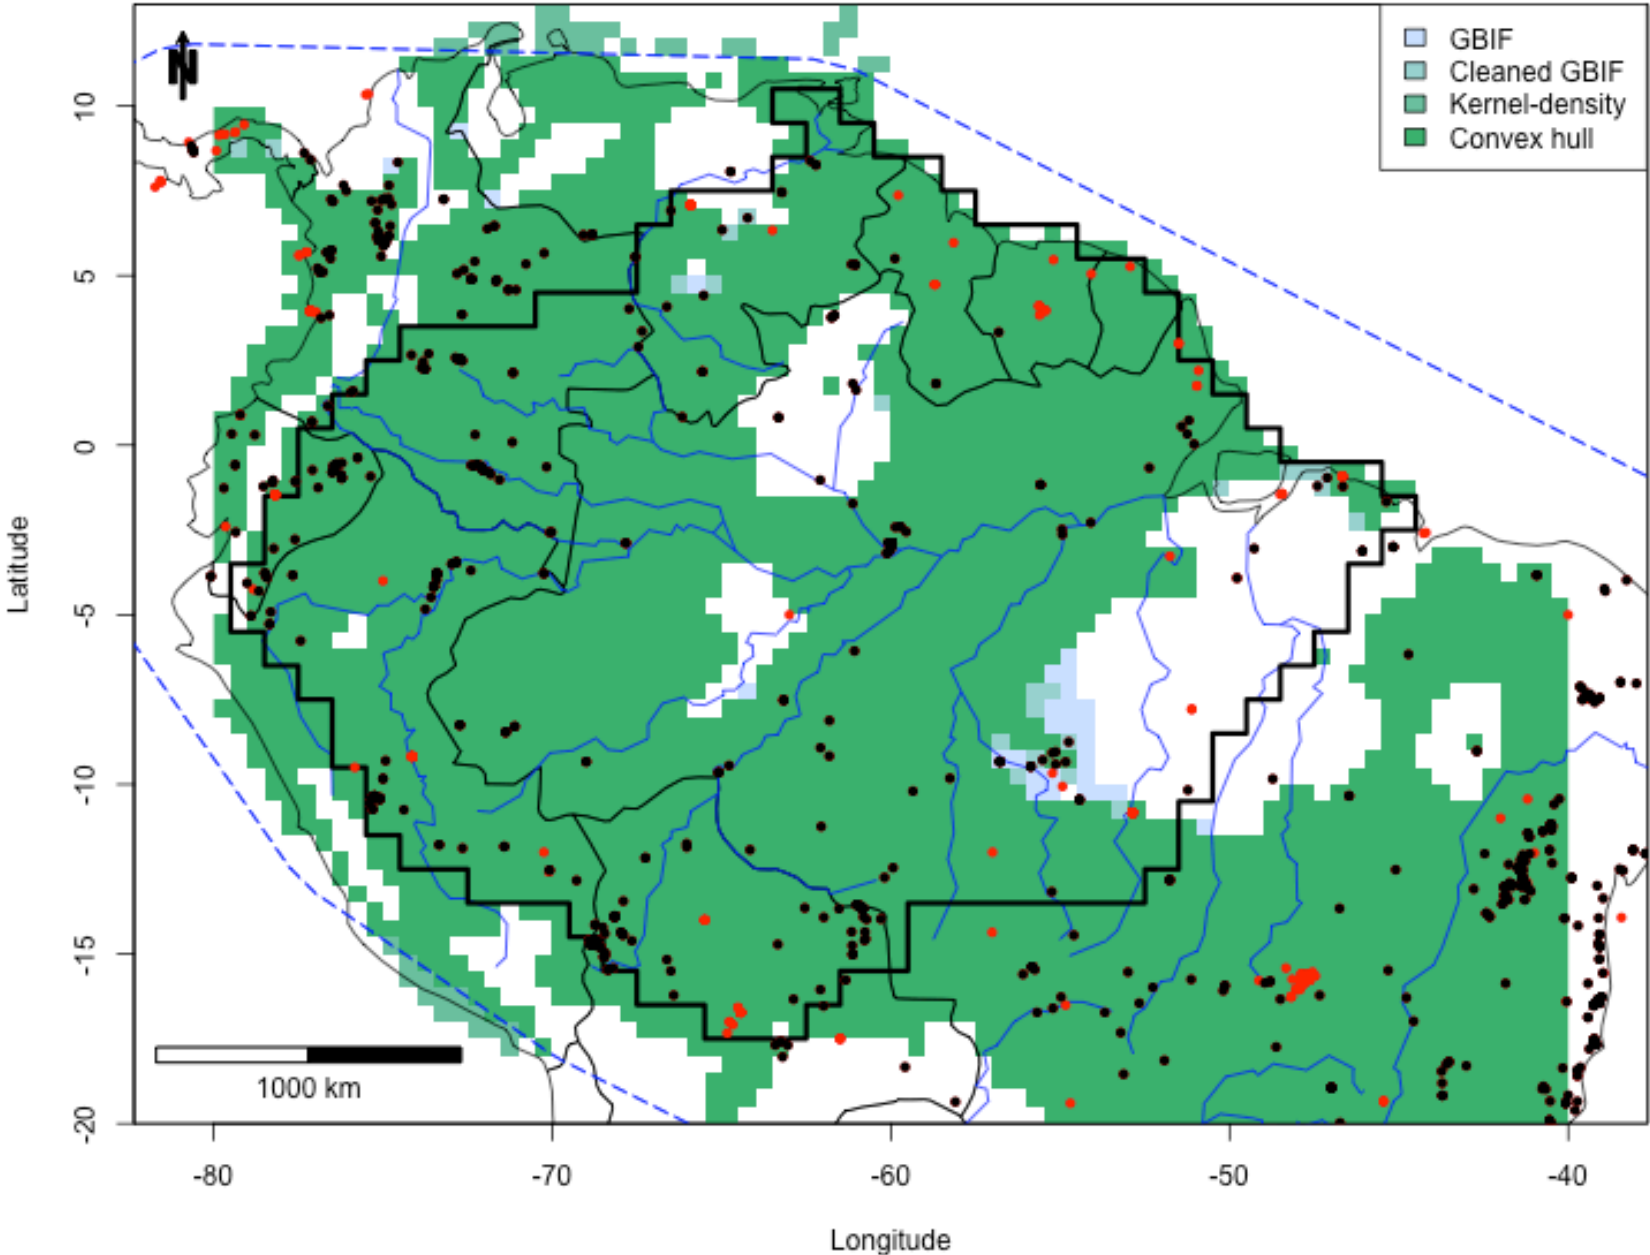



# Siparuna decipiens

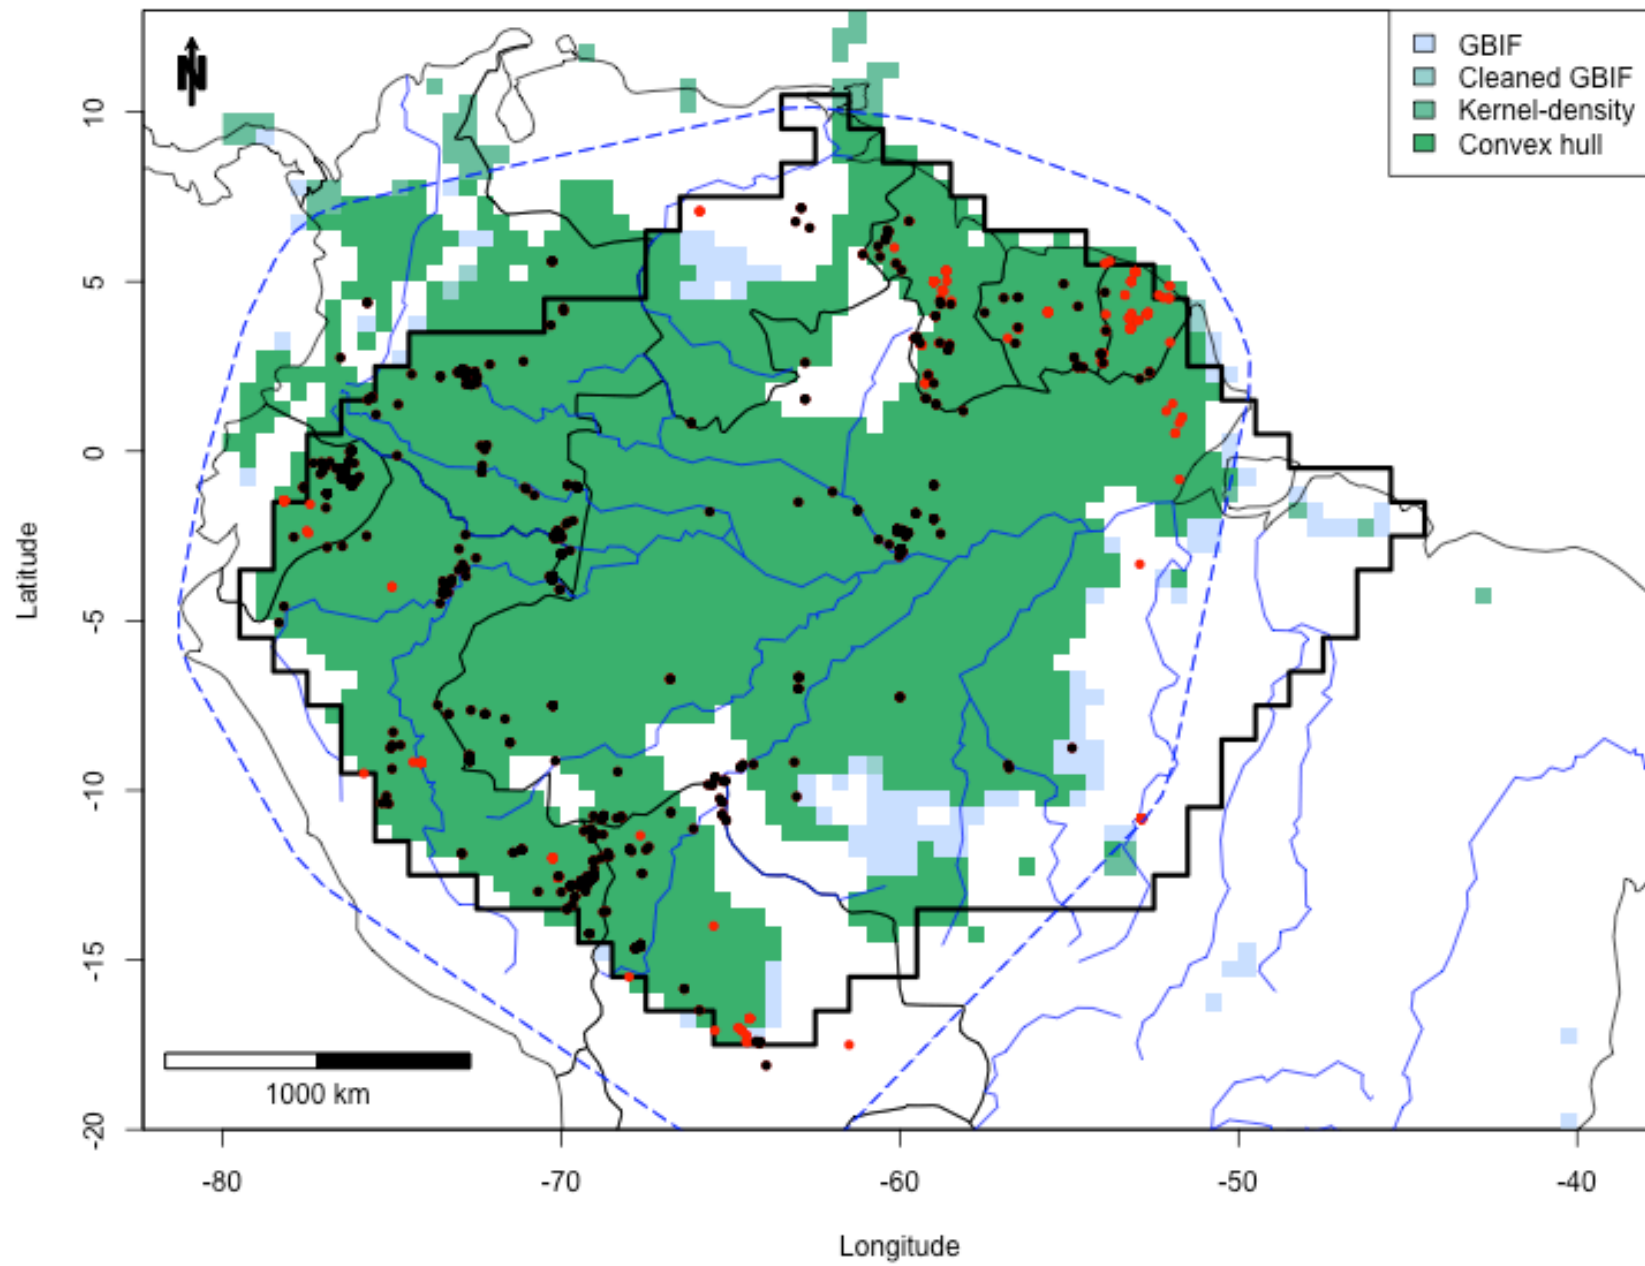

# Sloanea eichleri

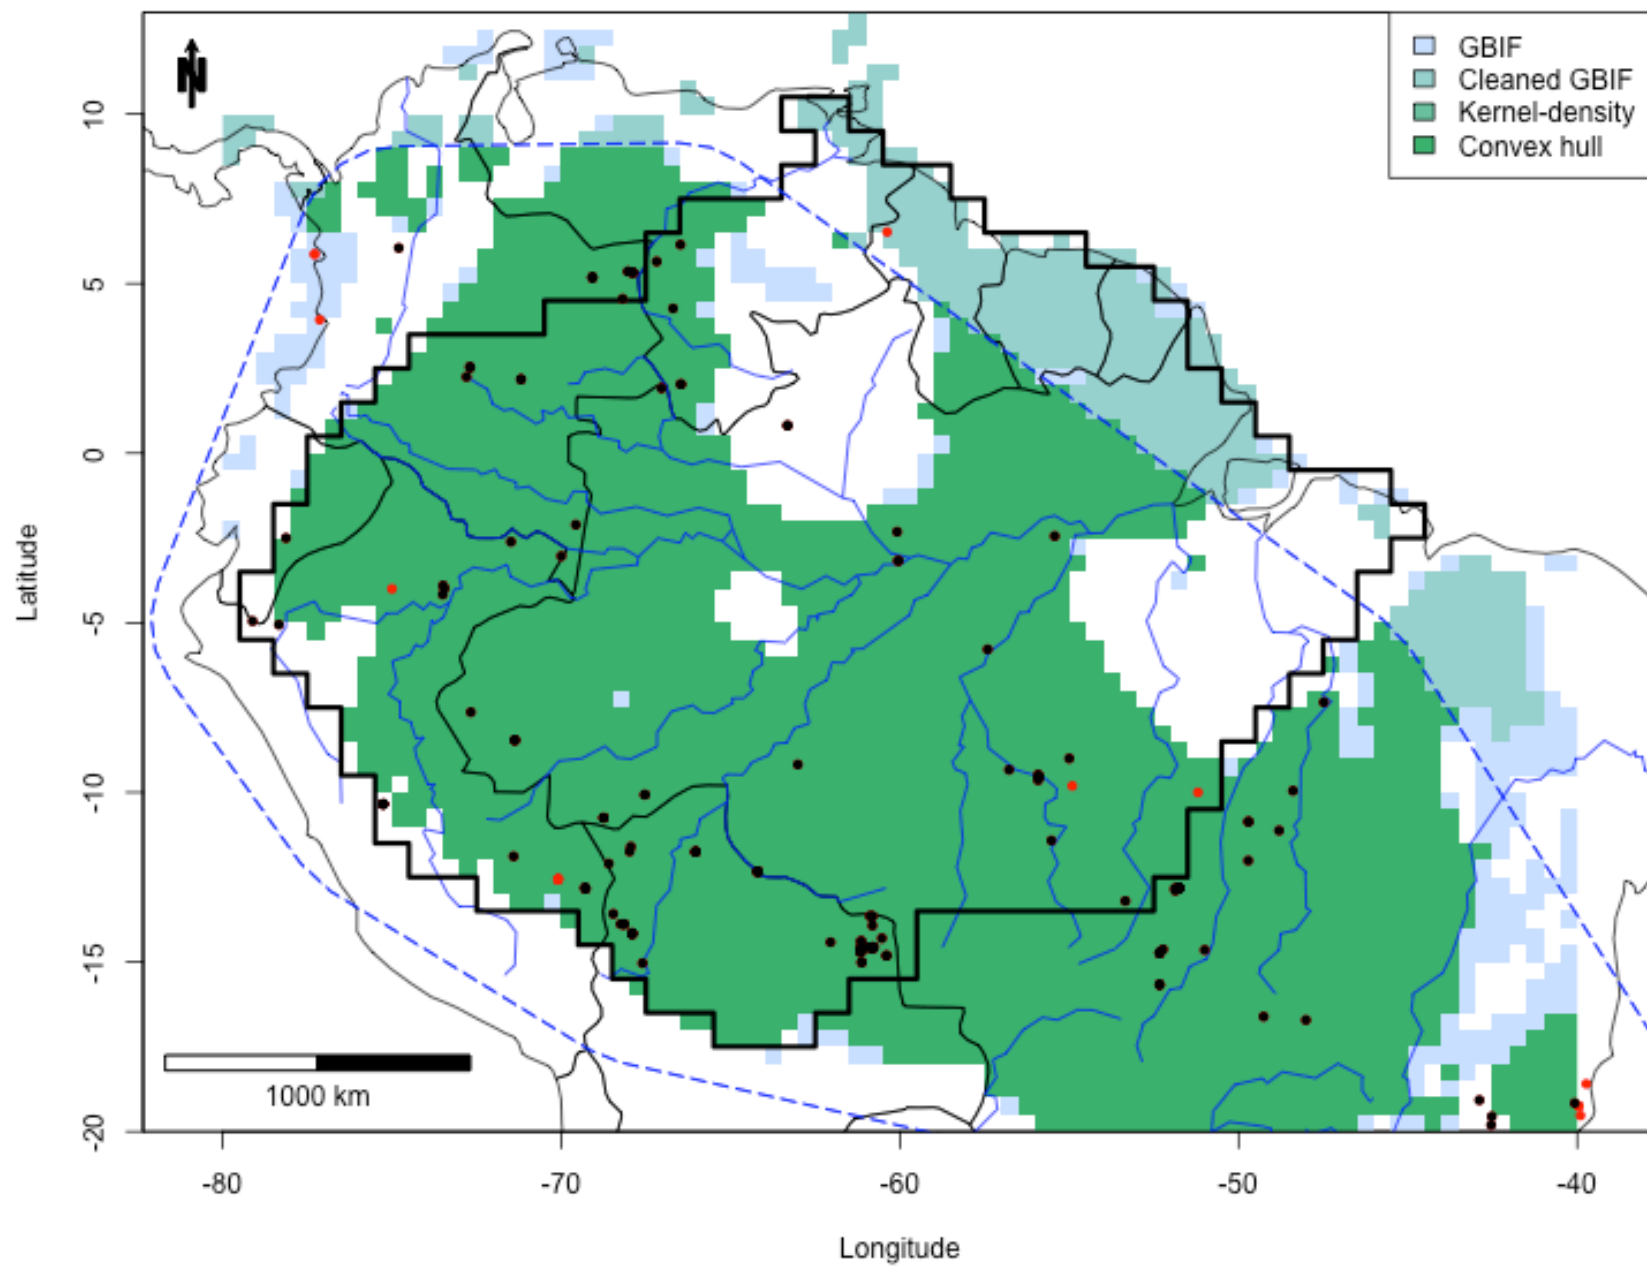

### Socratea exorrhiza

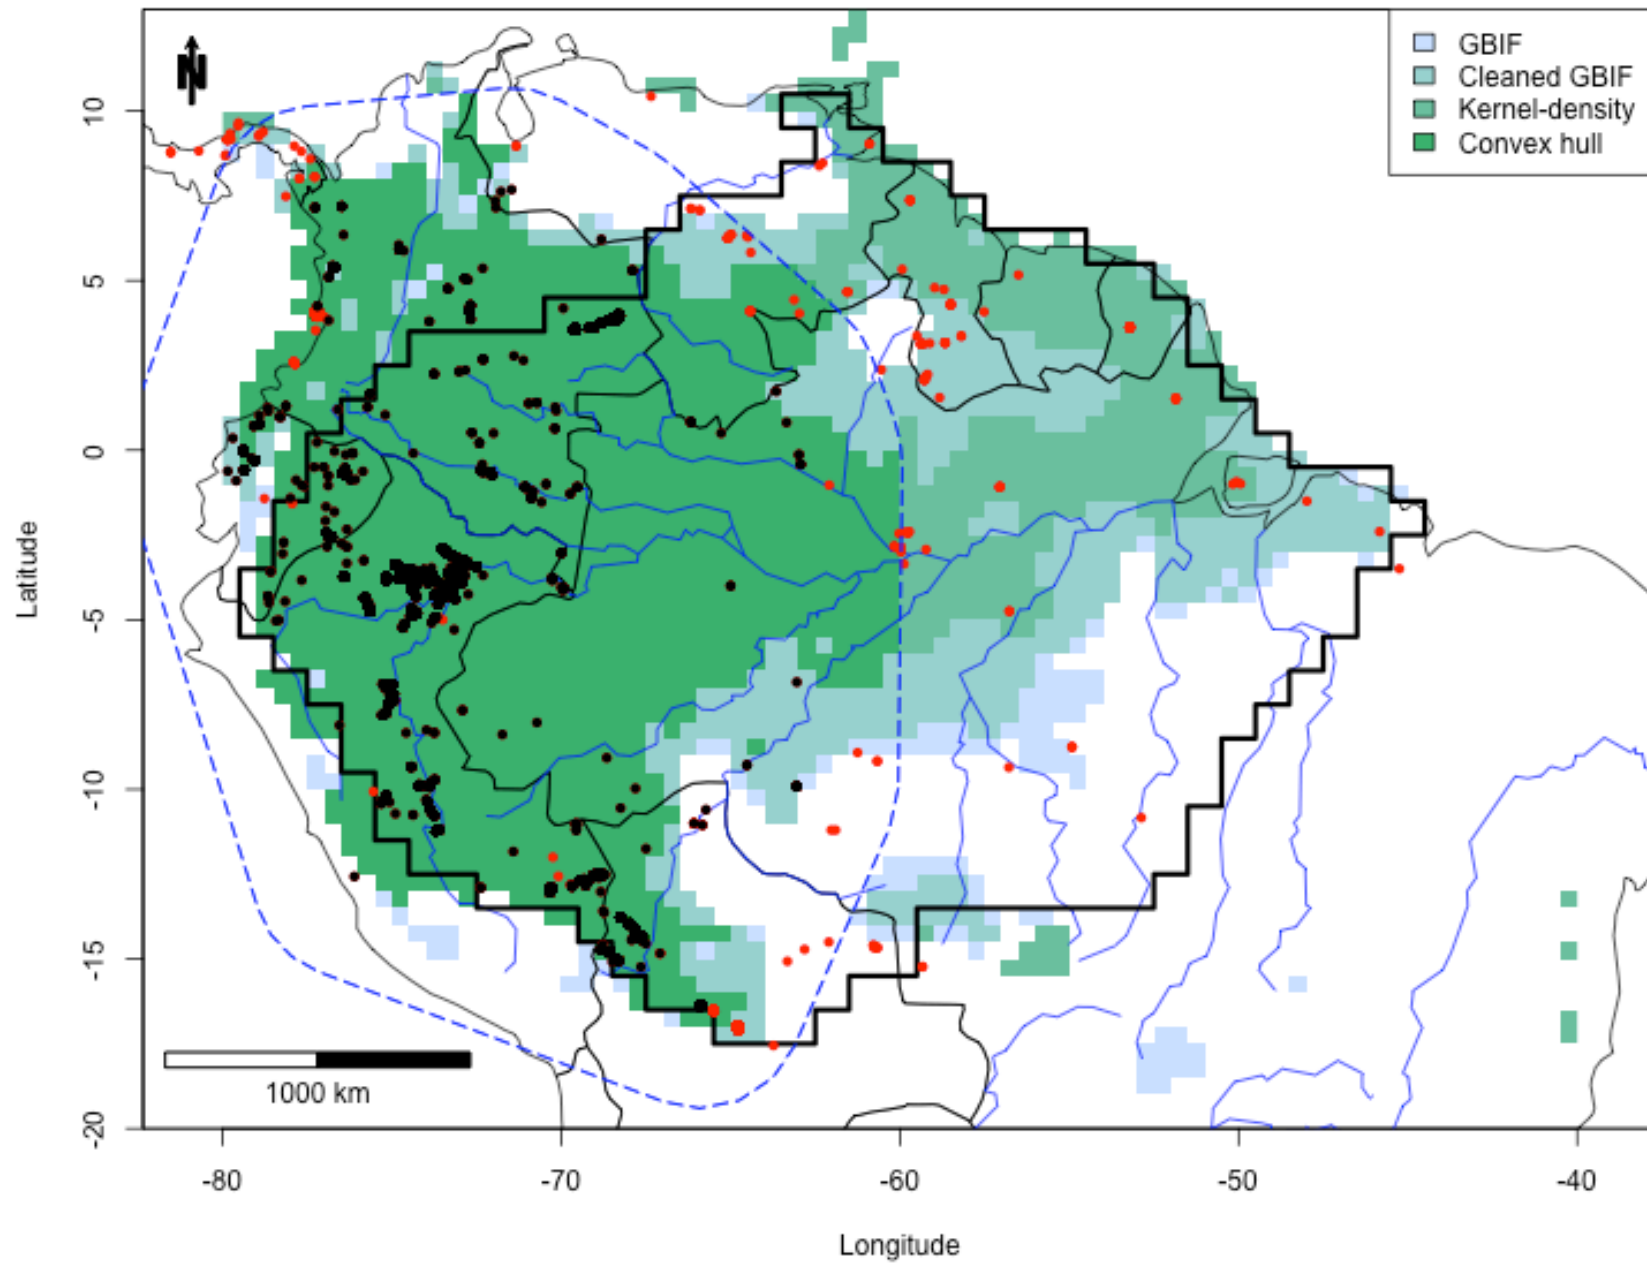

# Spondias mombin

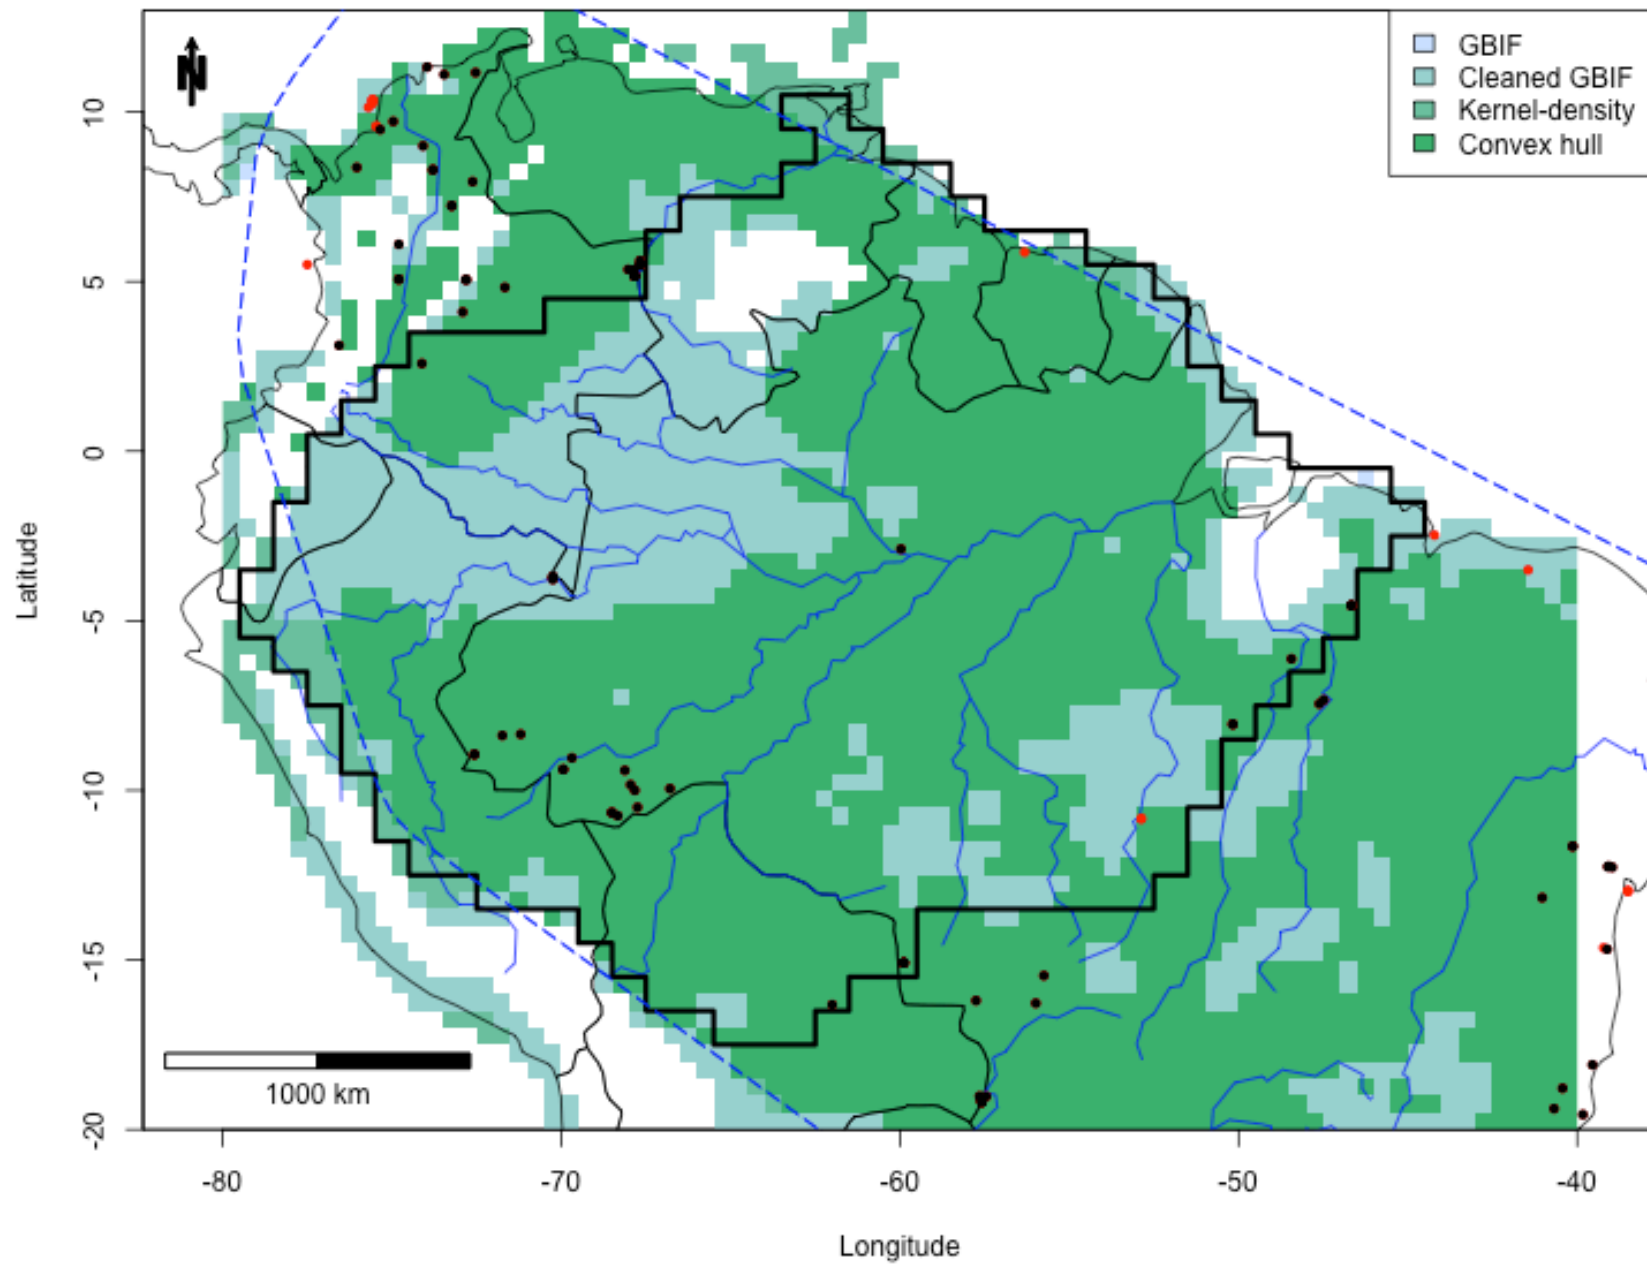

# *Sterculia pruriens*

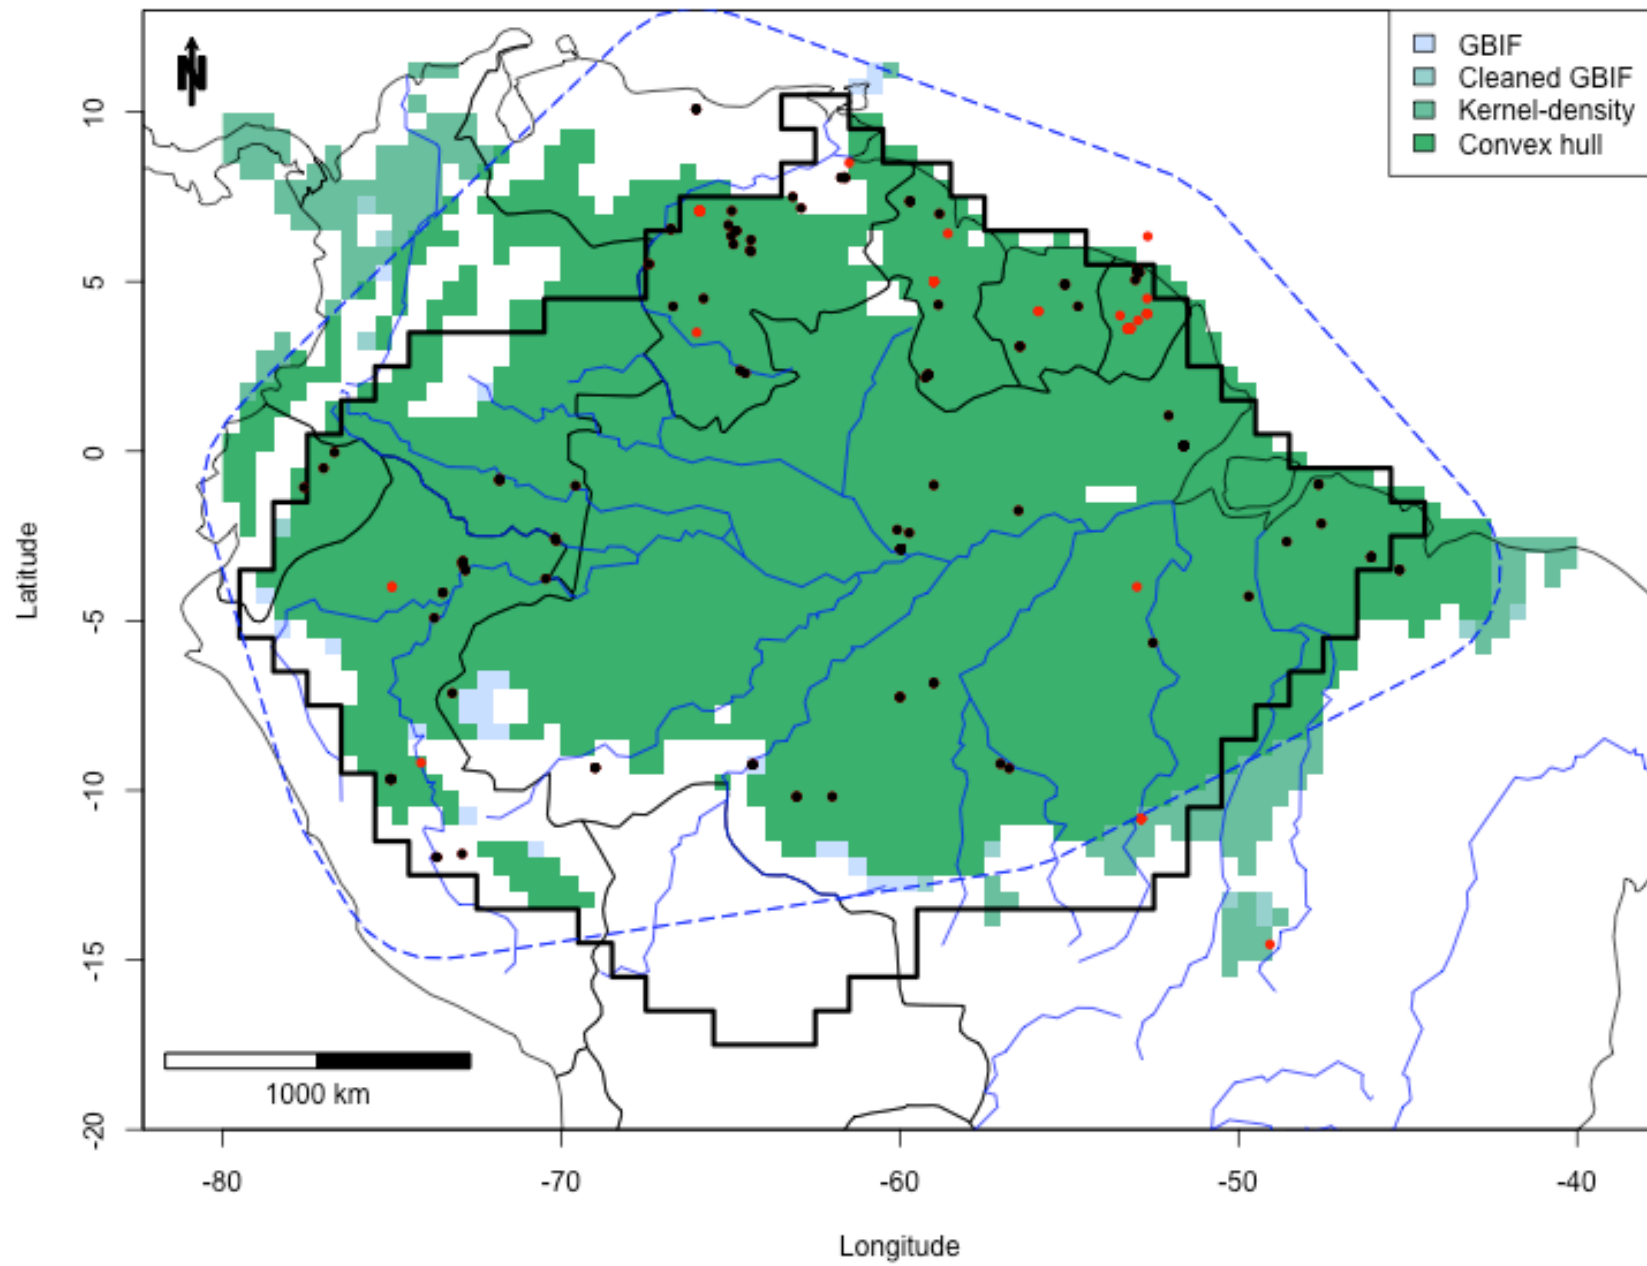

# Swartzia leiocalycina

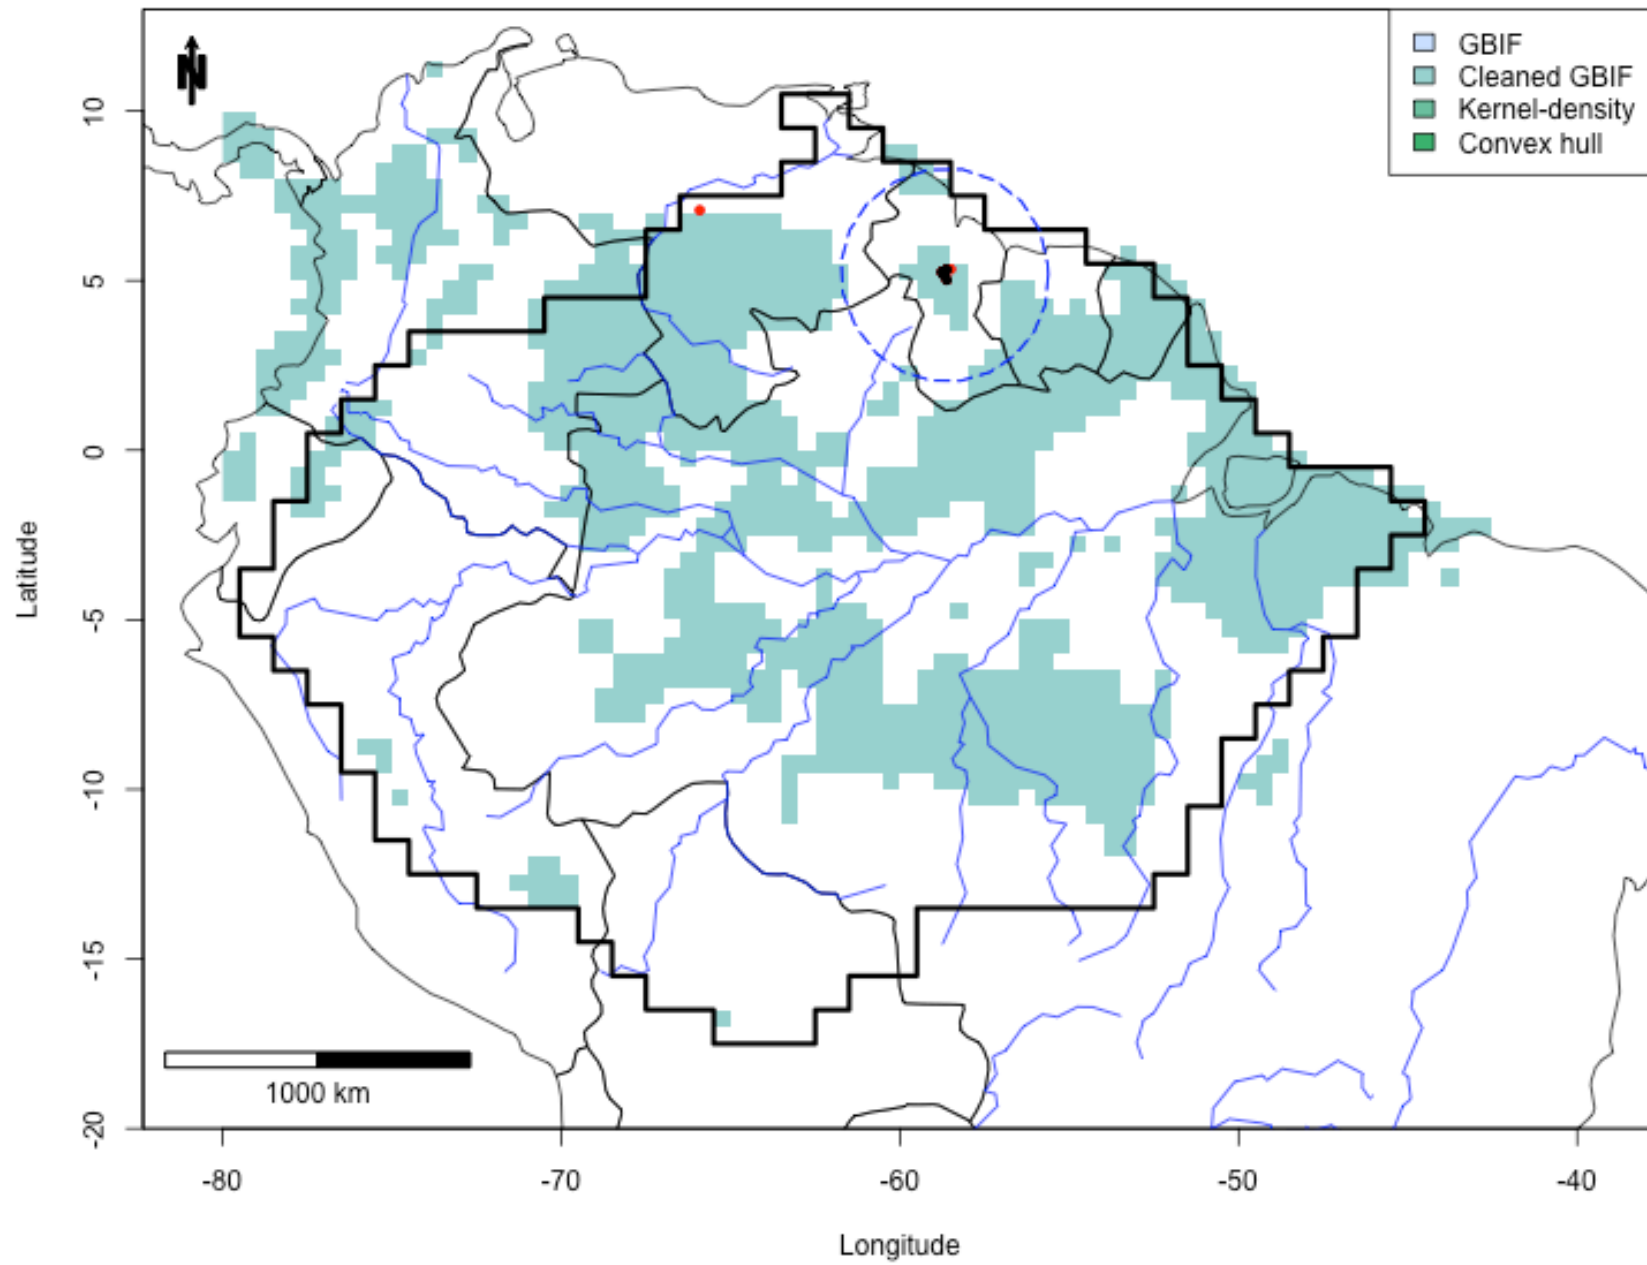

# Swartzia polyphylla

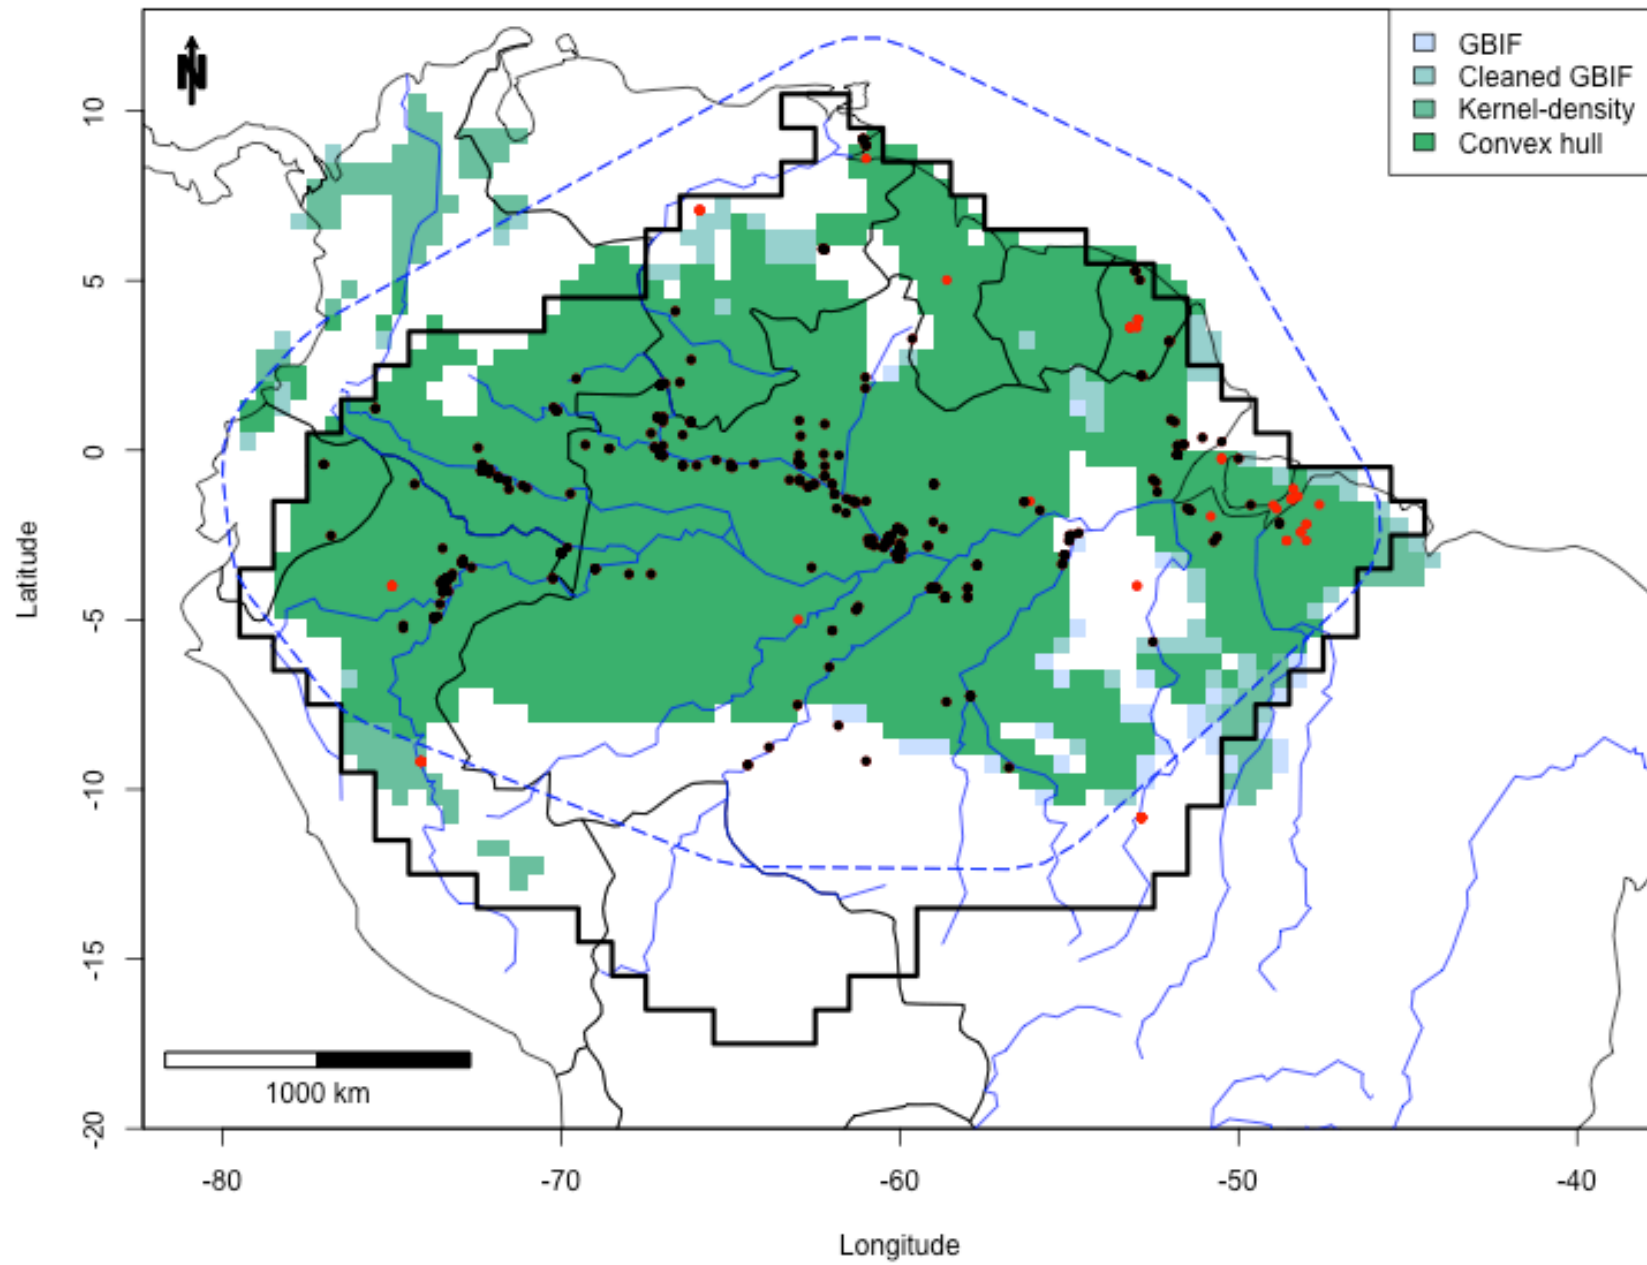



# *Symphonia globulifera*

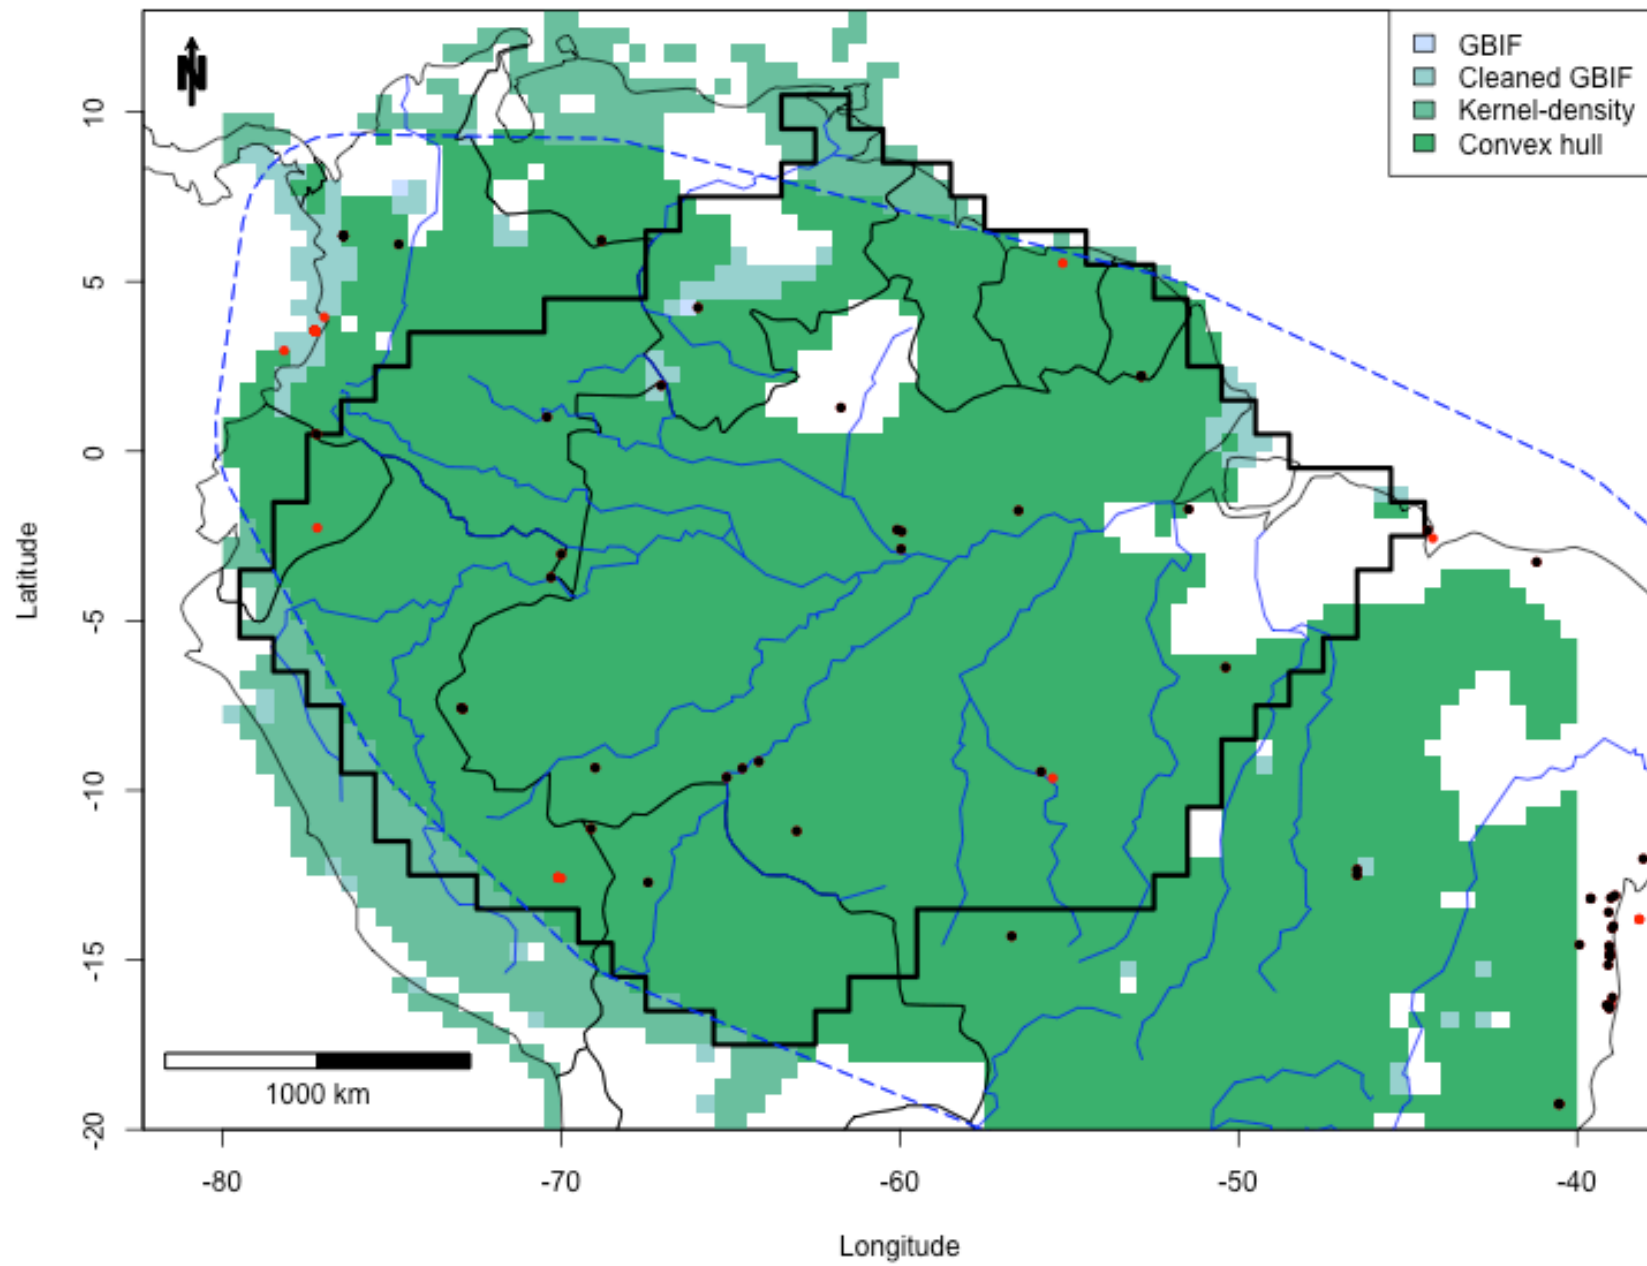

# Tachigali chrysophylla

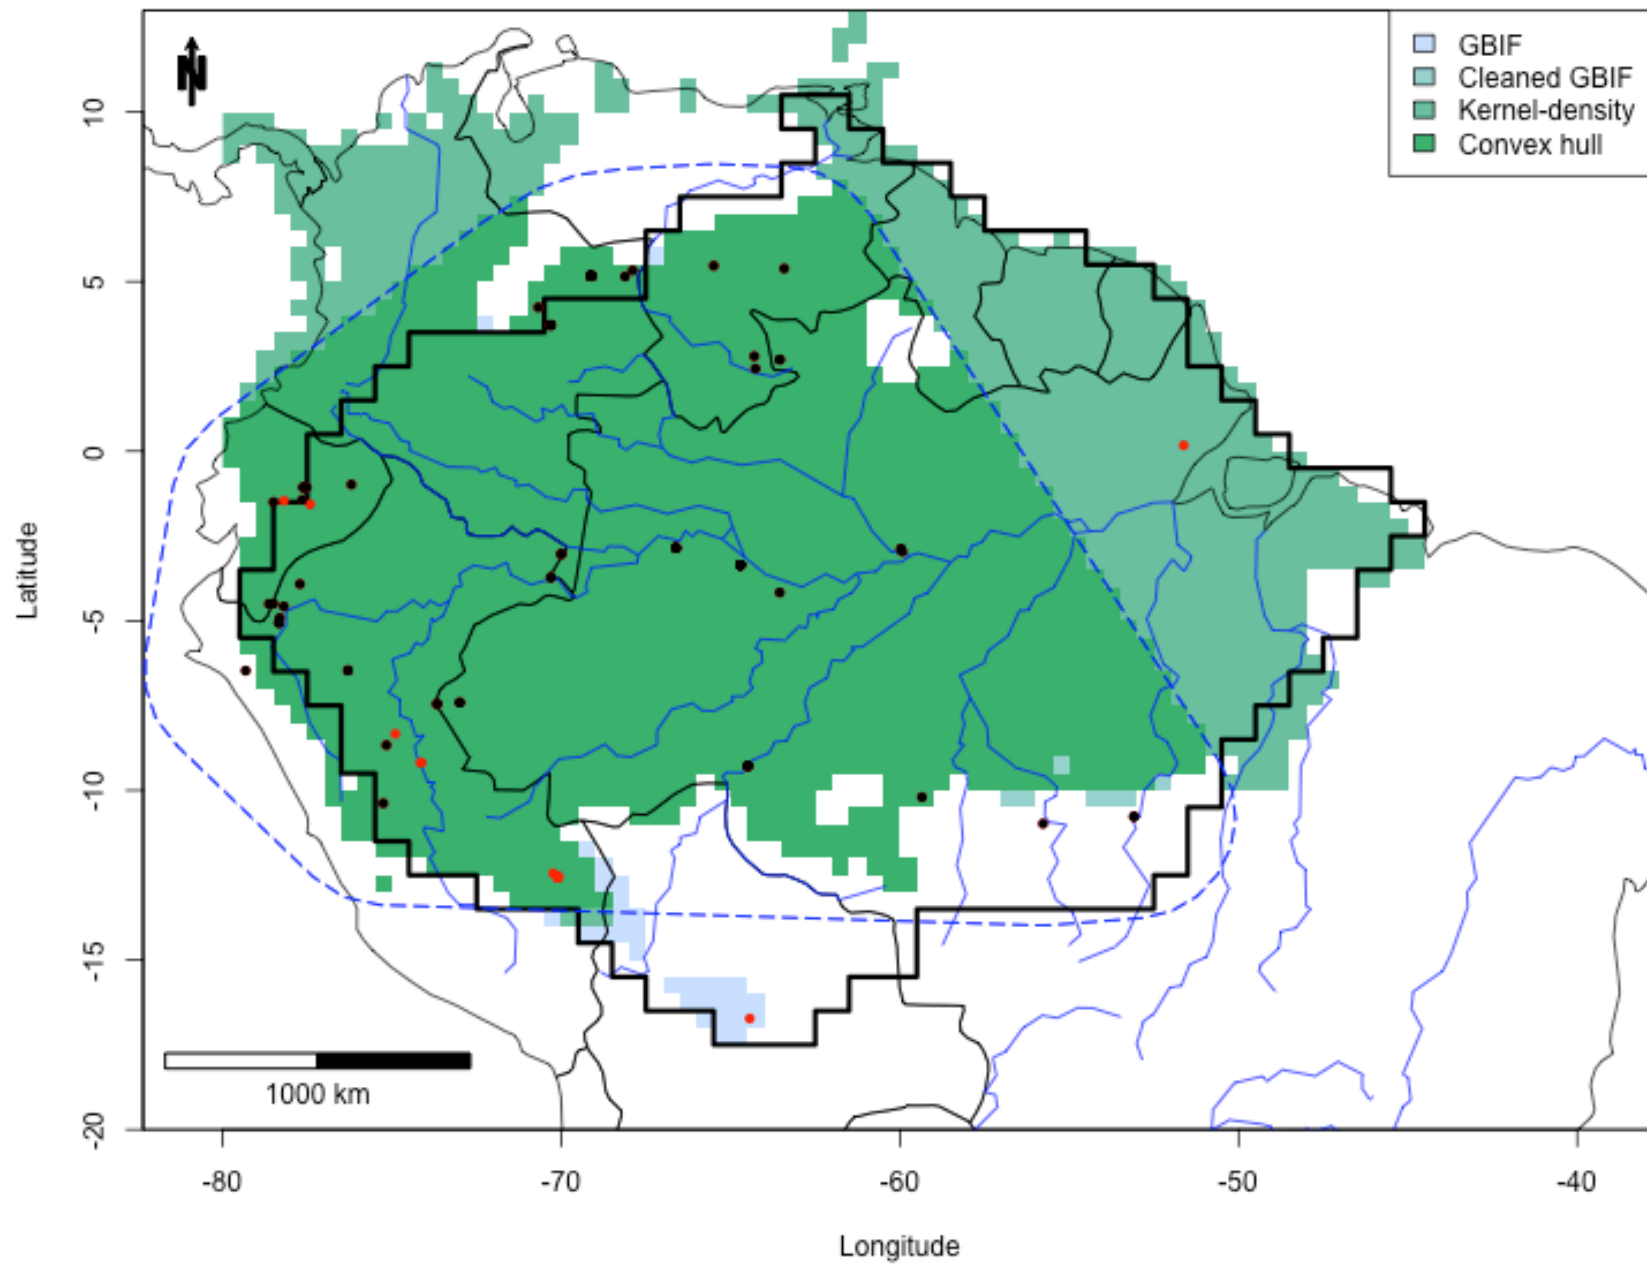

# Tachigali paniculata

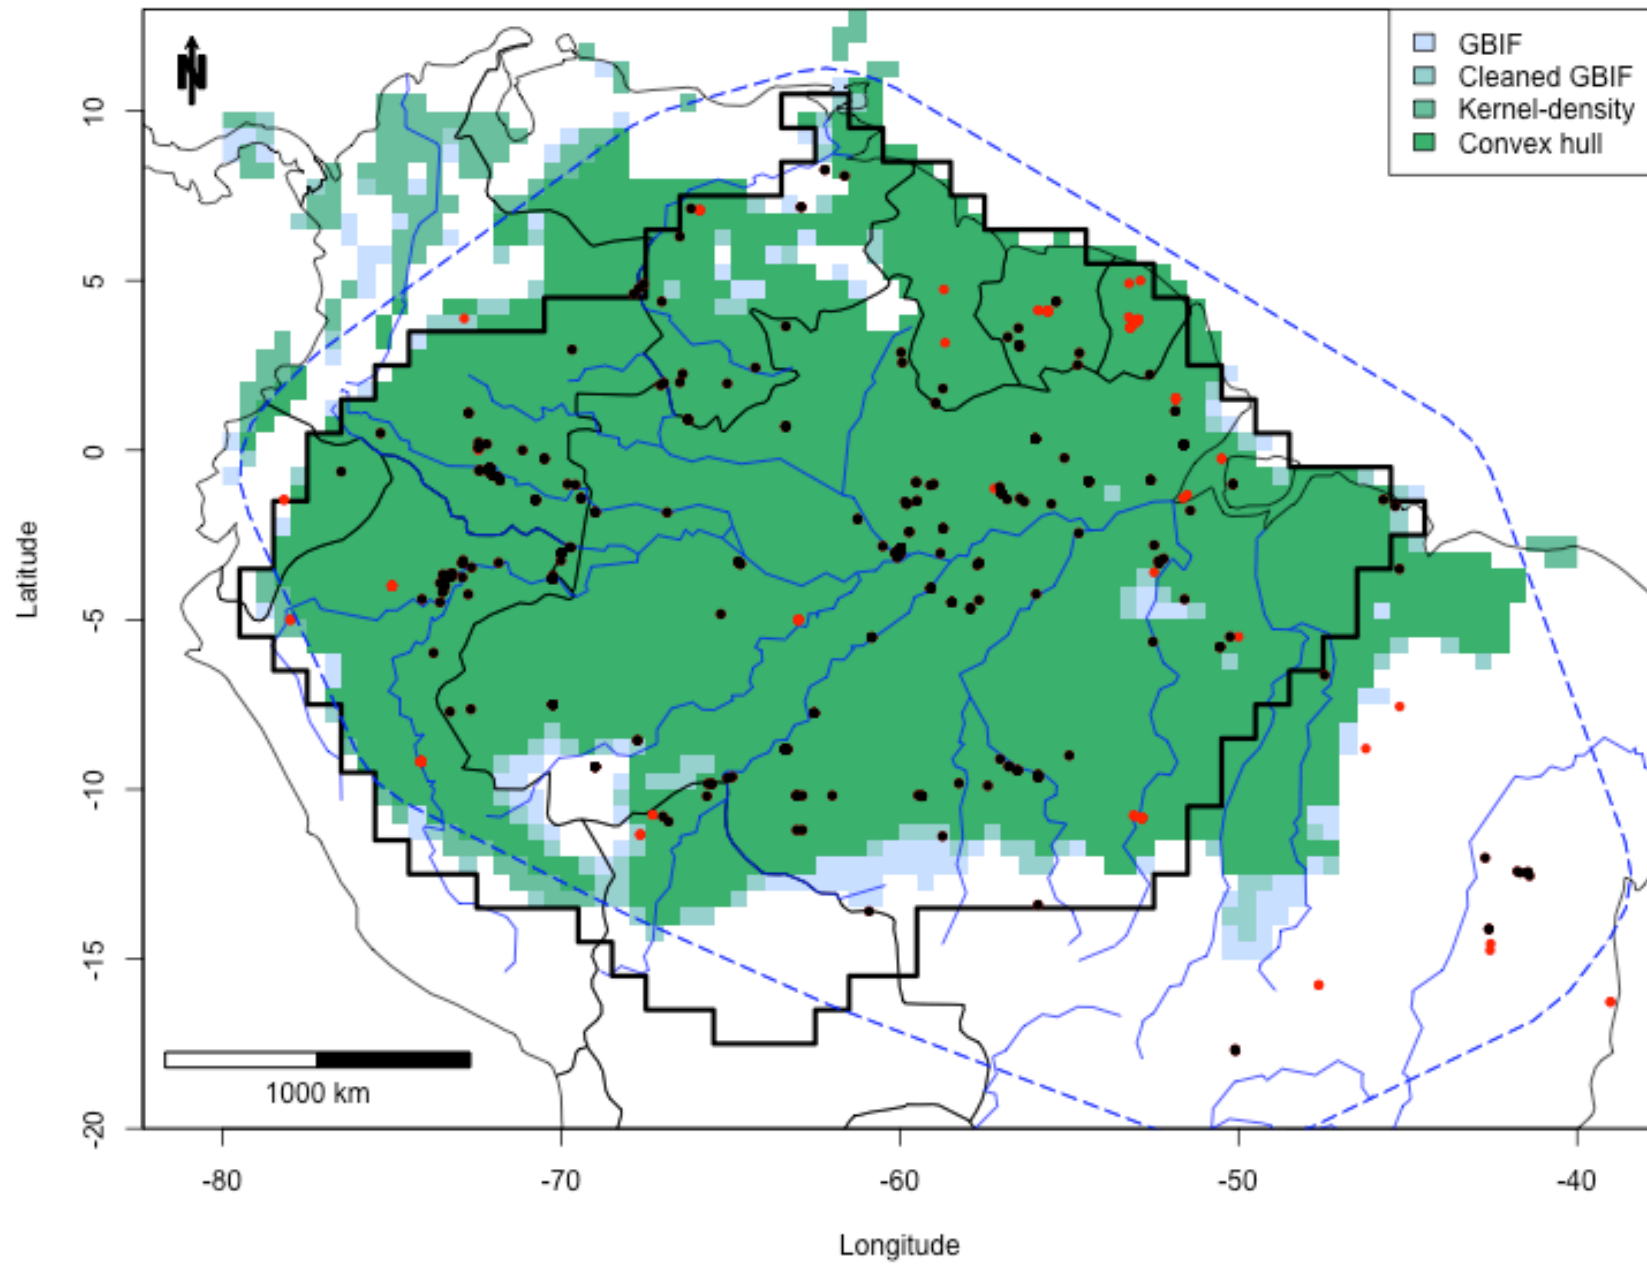

# Tachigali rugosa

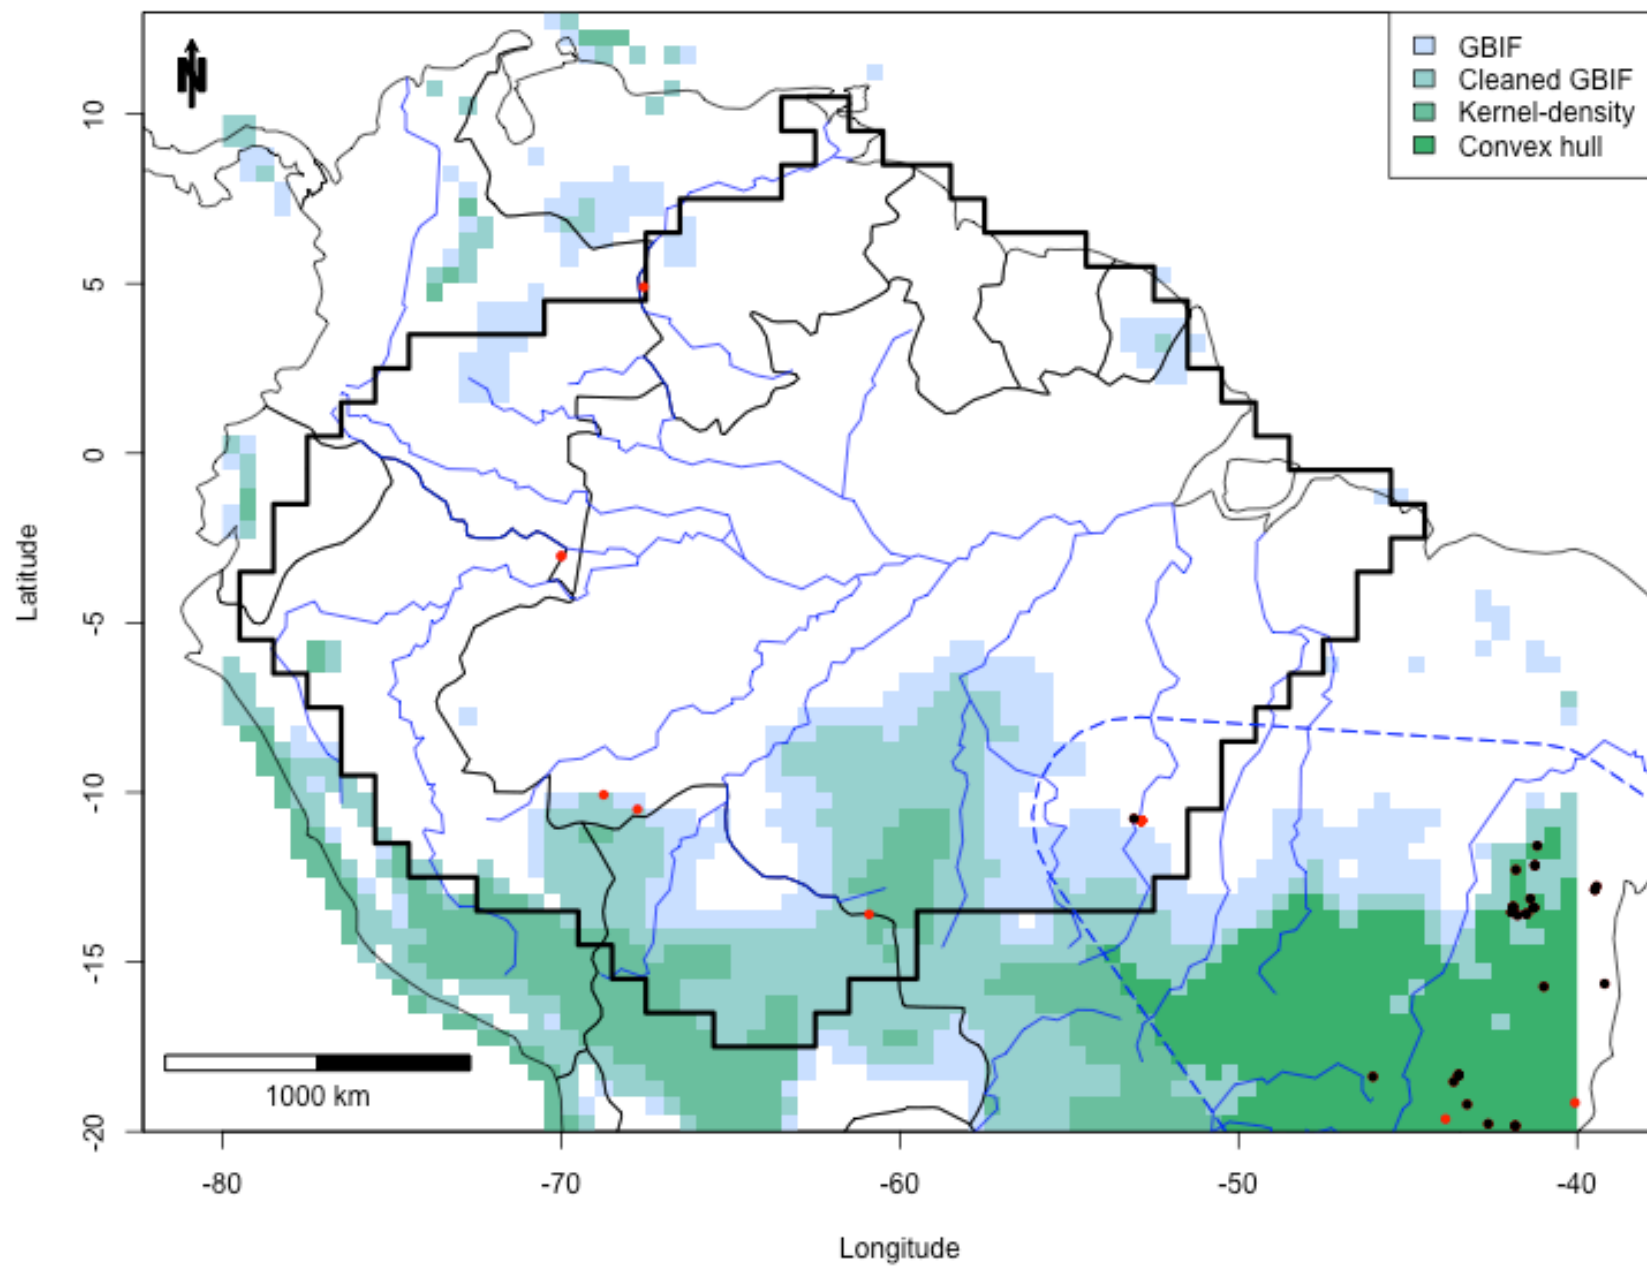

# Tapirira guianensis

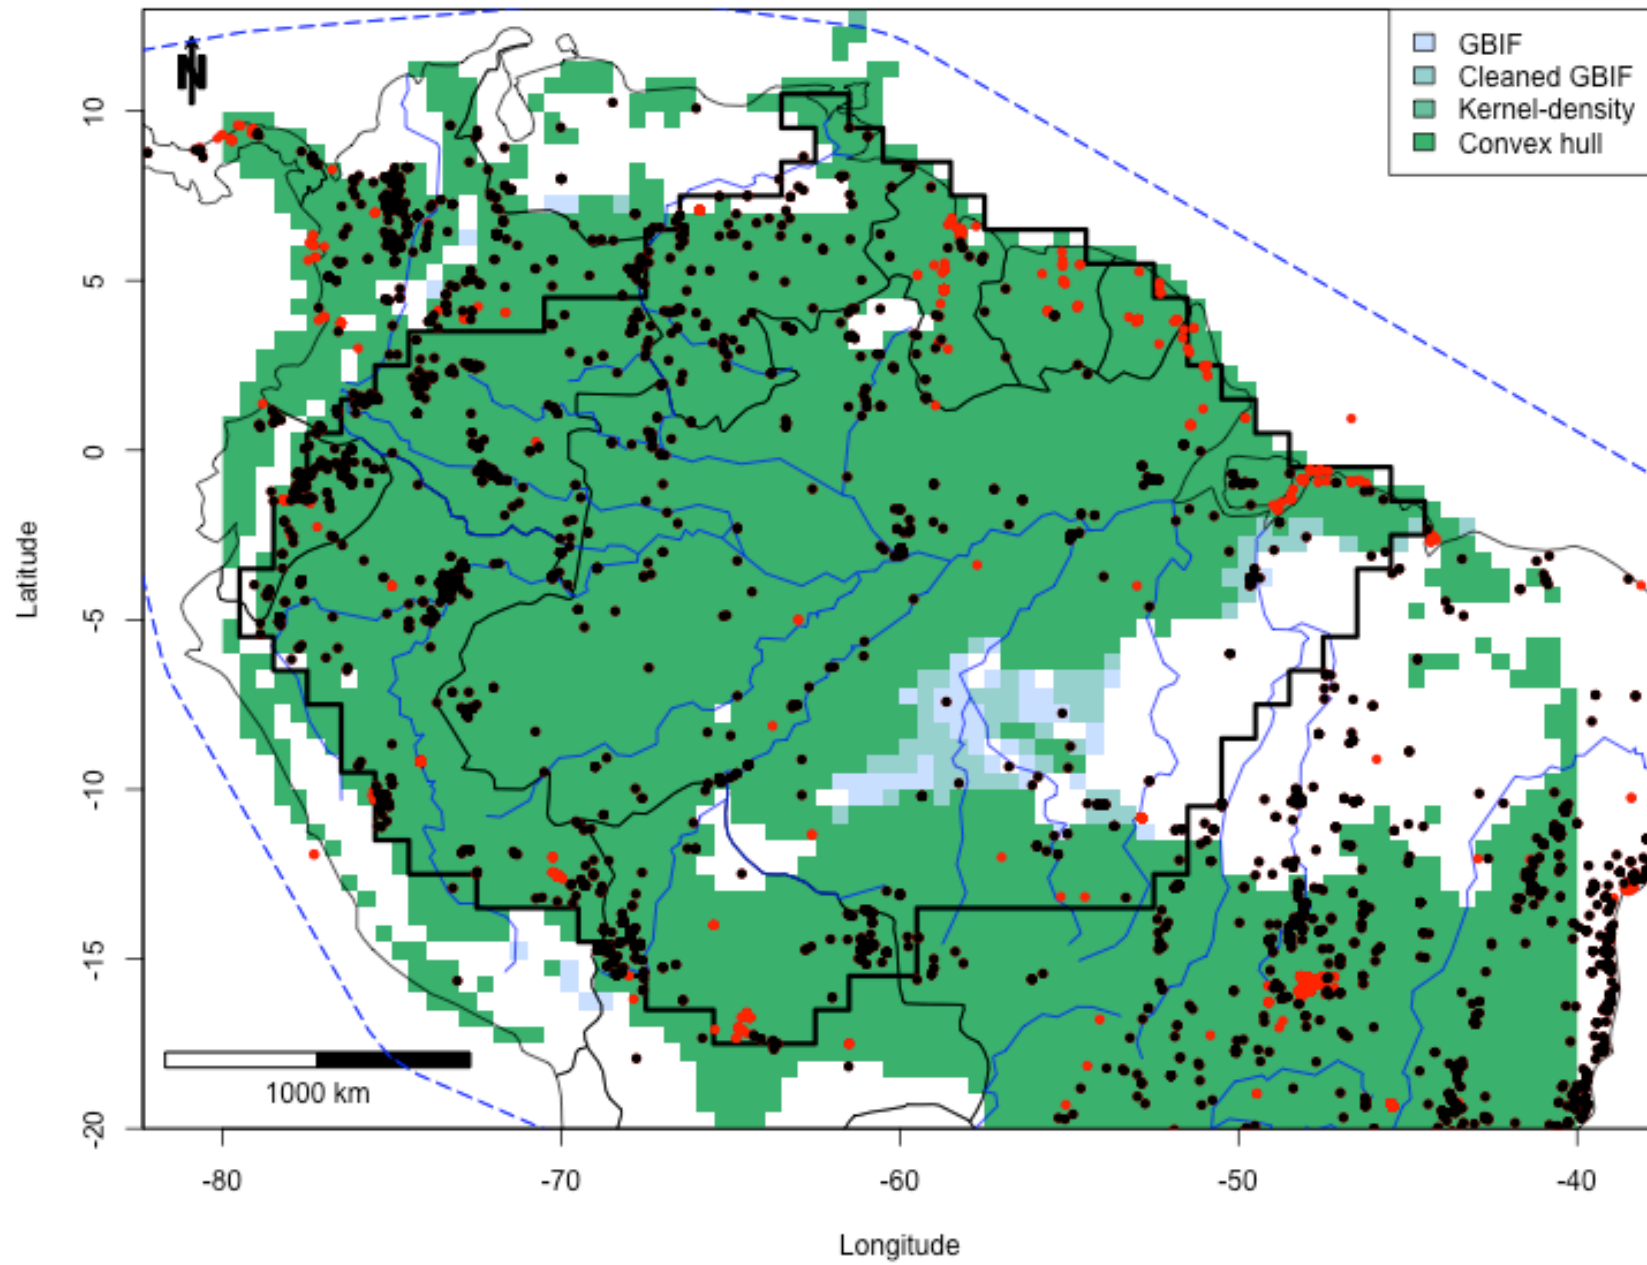

# Tetragastris altissima

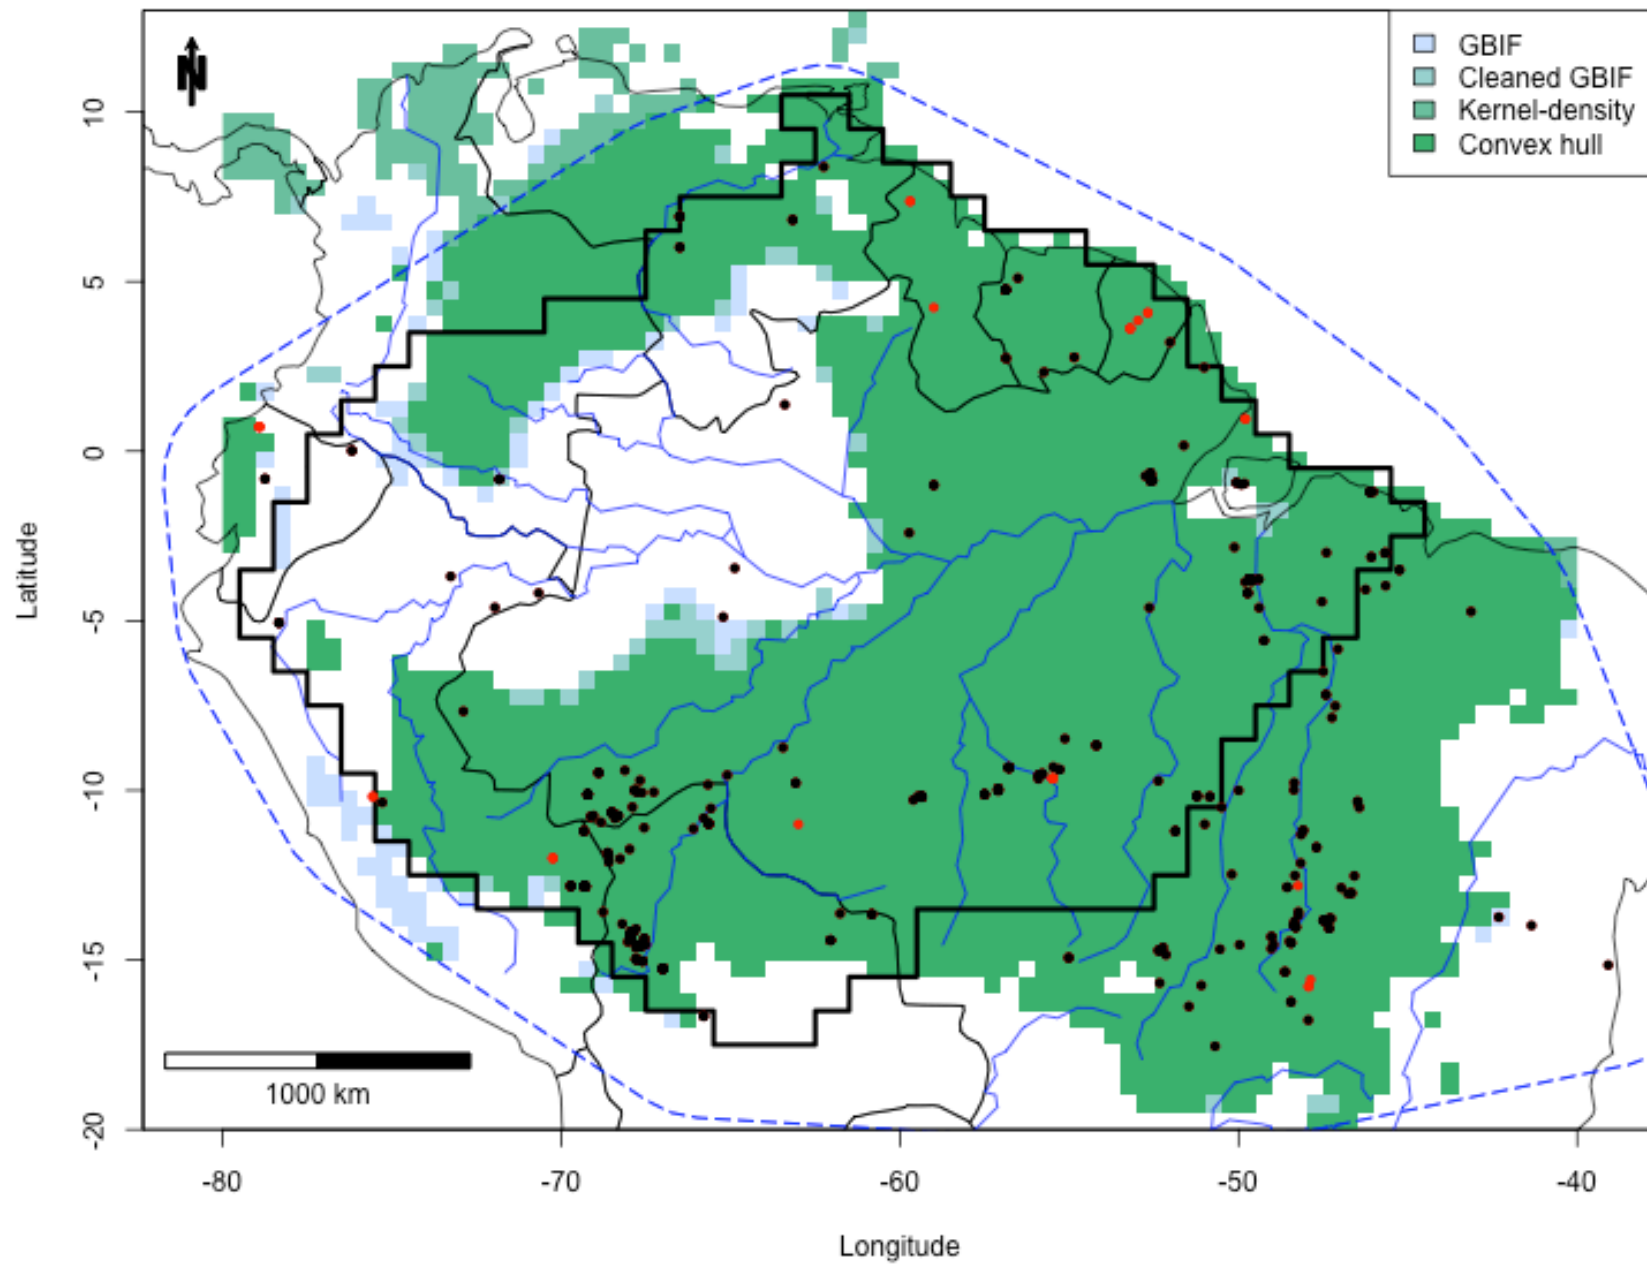

# Tetragastris panamensis

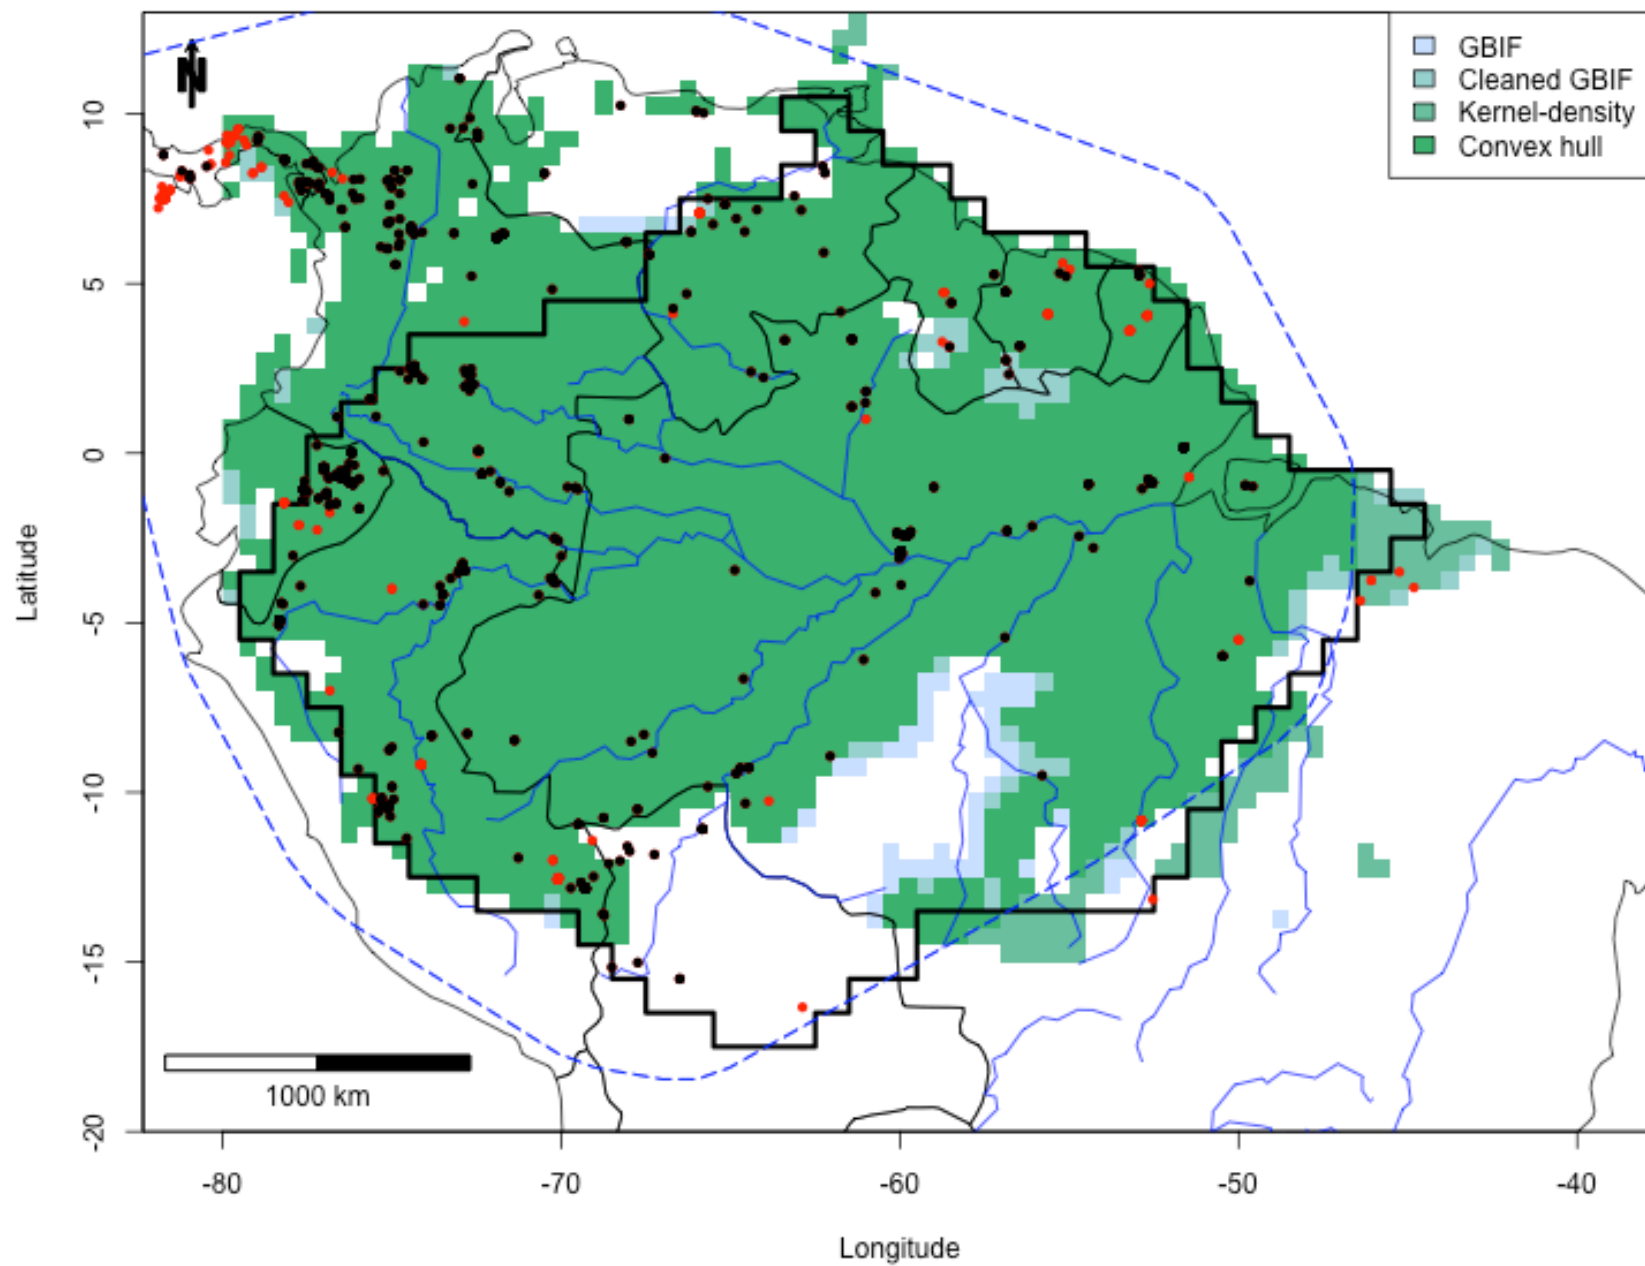



# Theobroma cacao

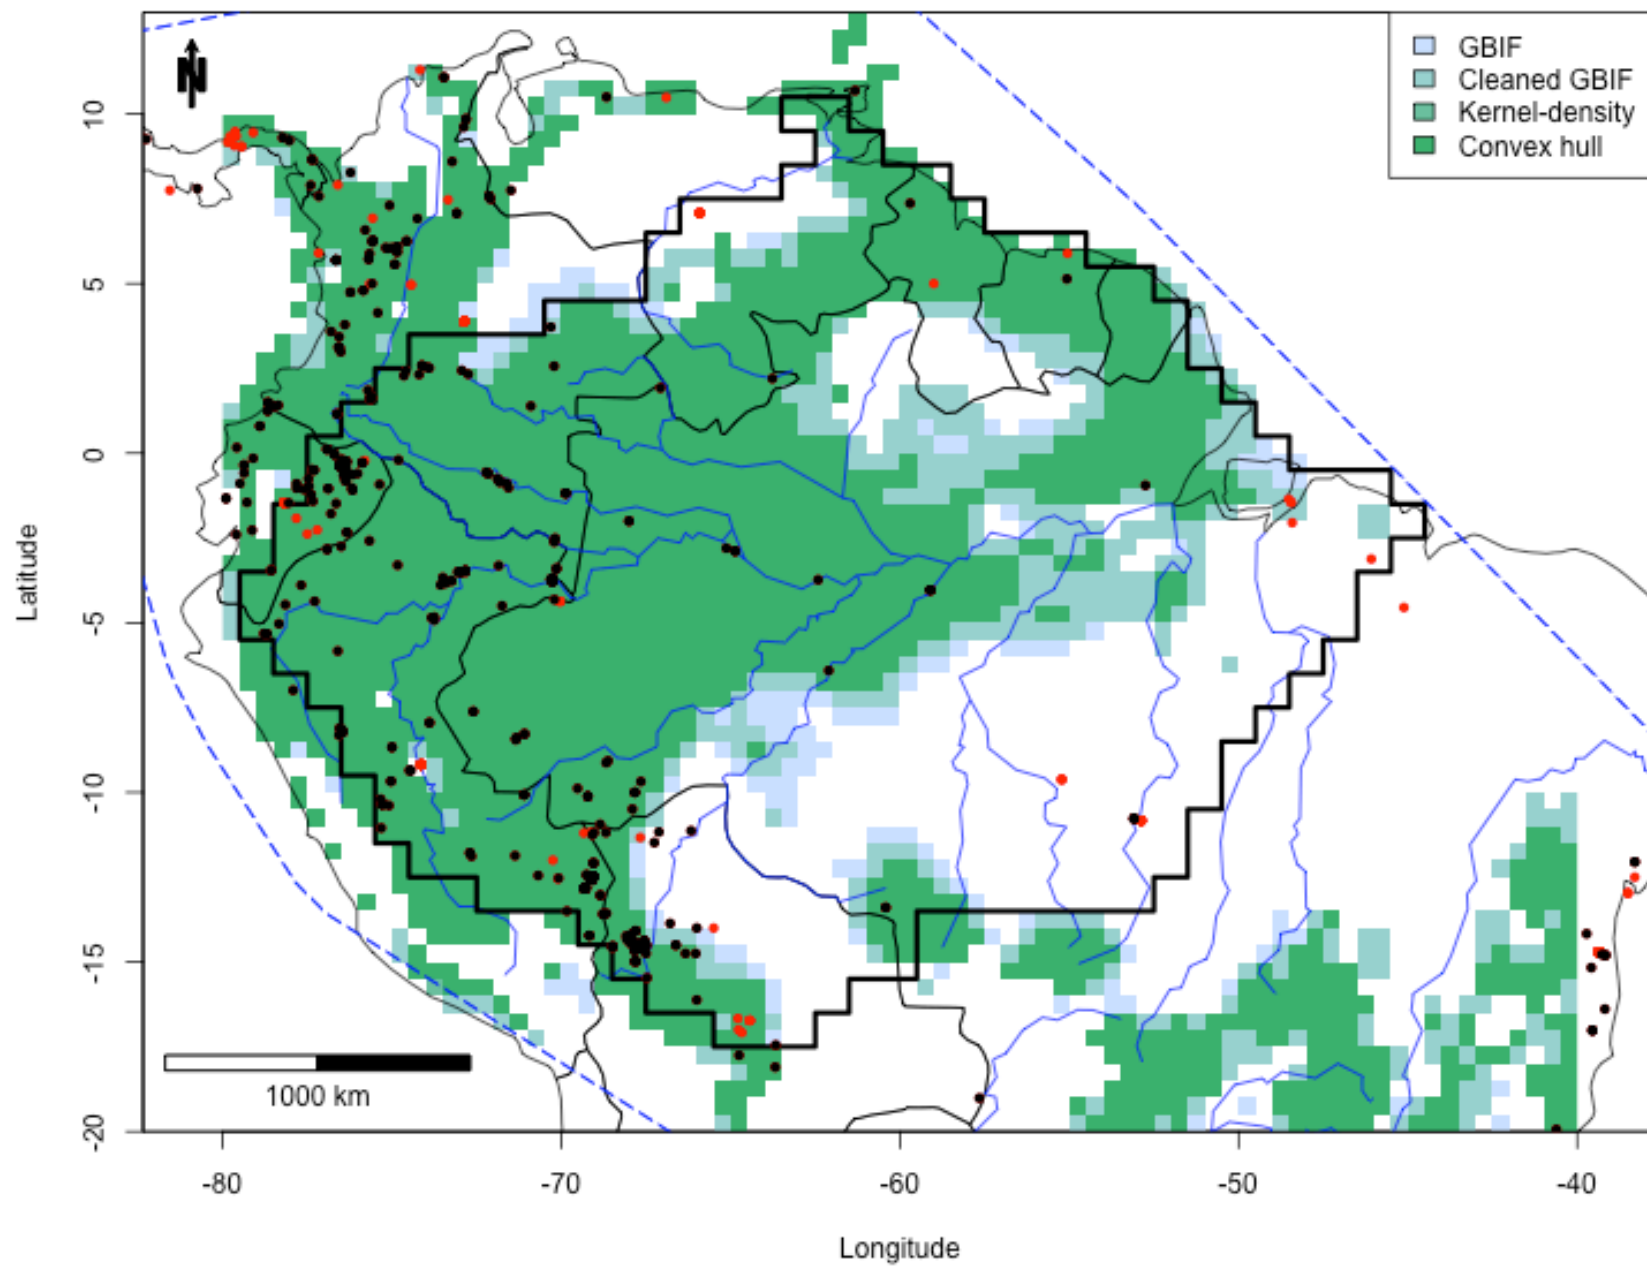

# Theobroma speciosum

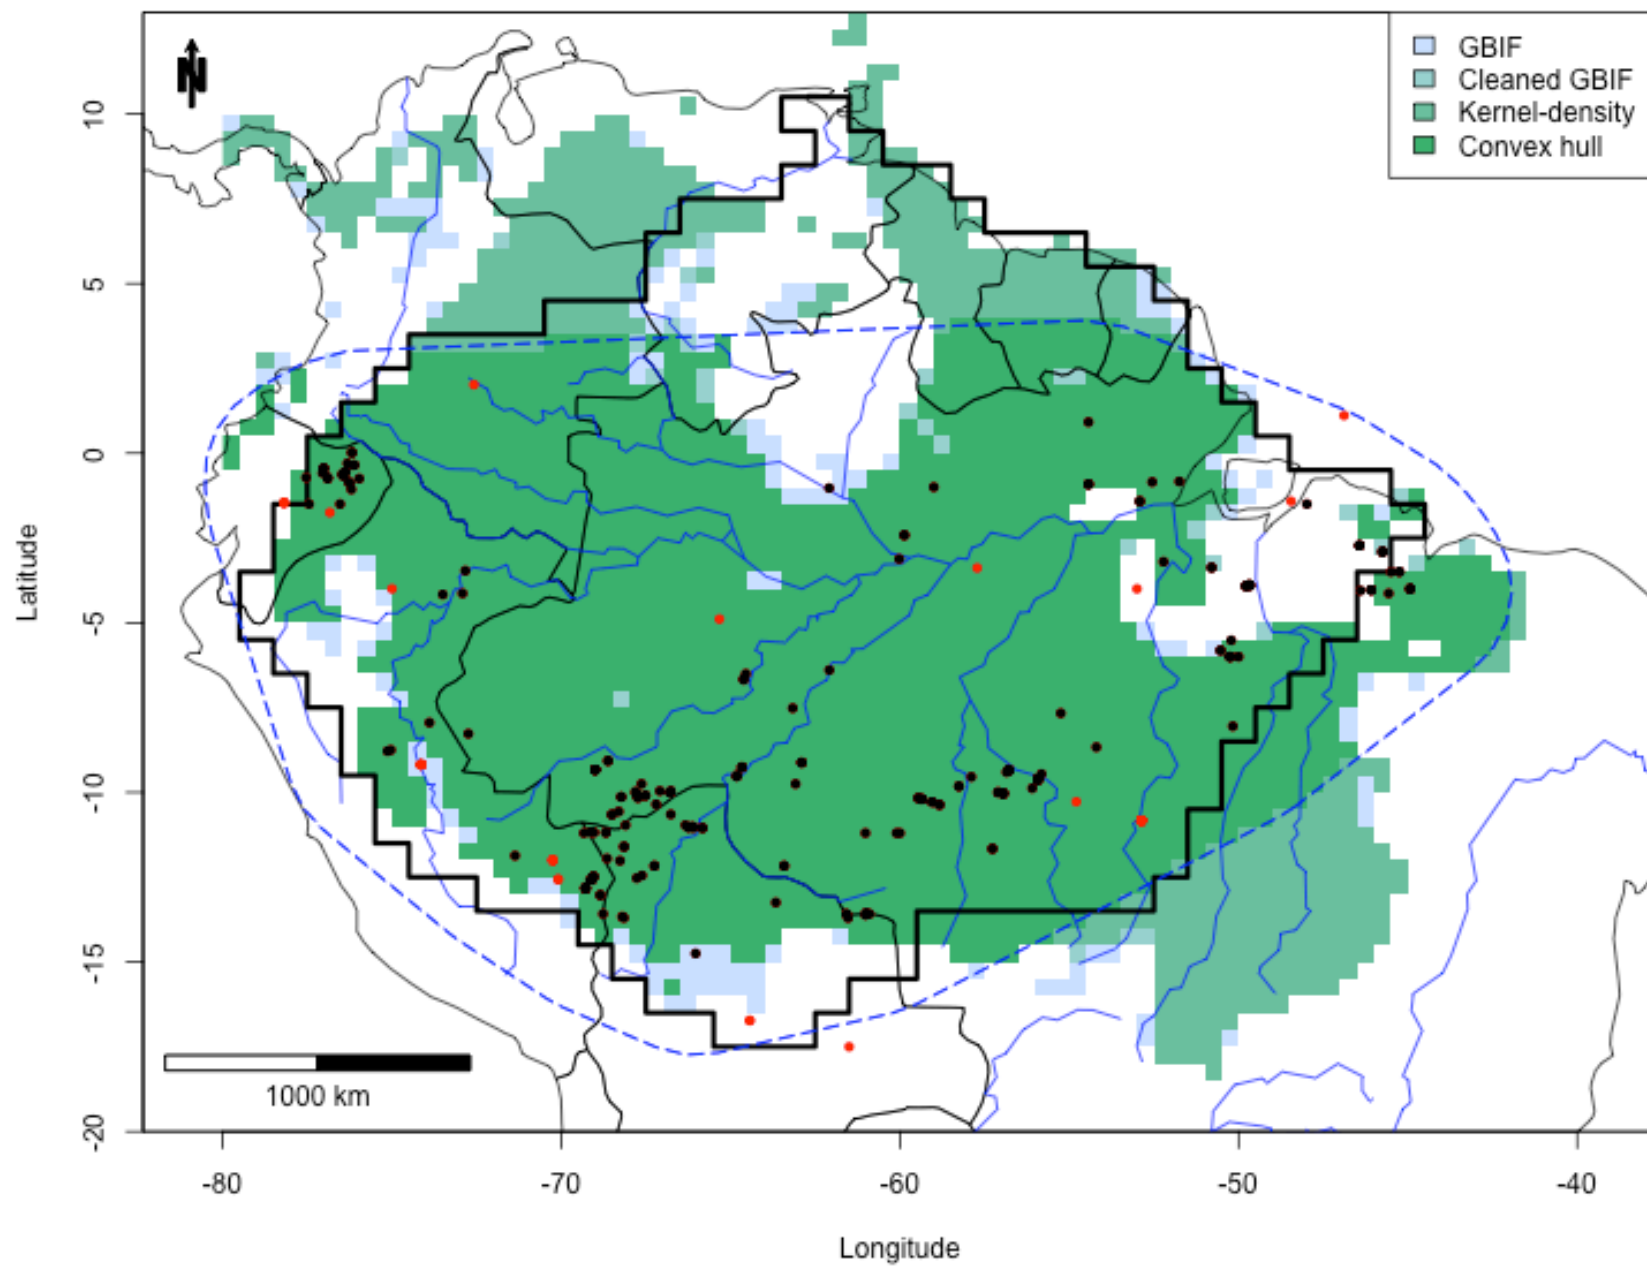

# Theobroma subincanum

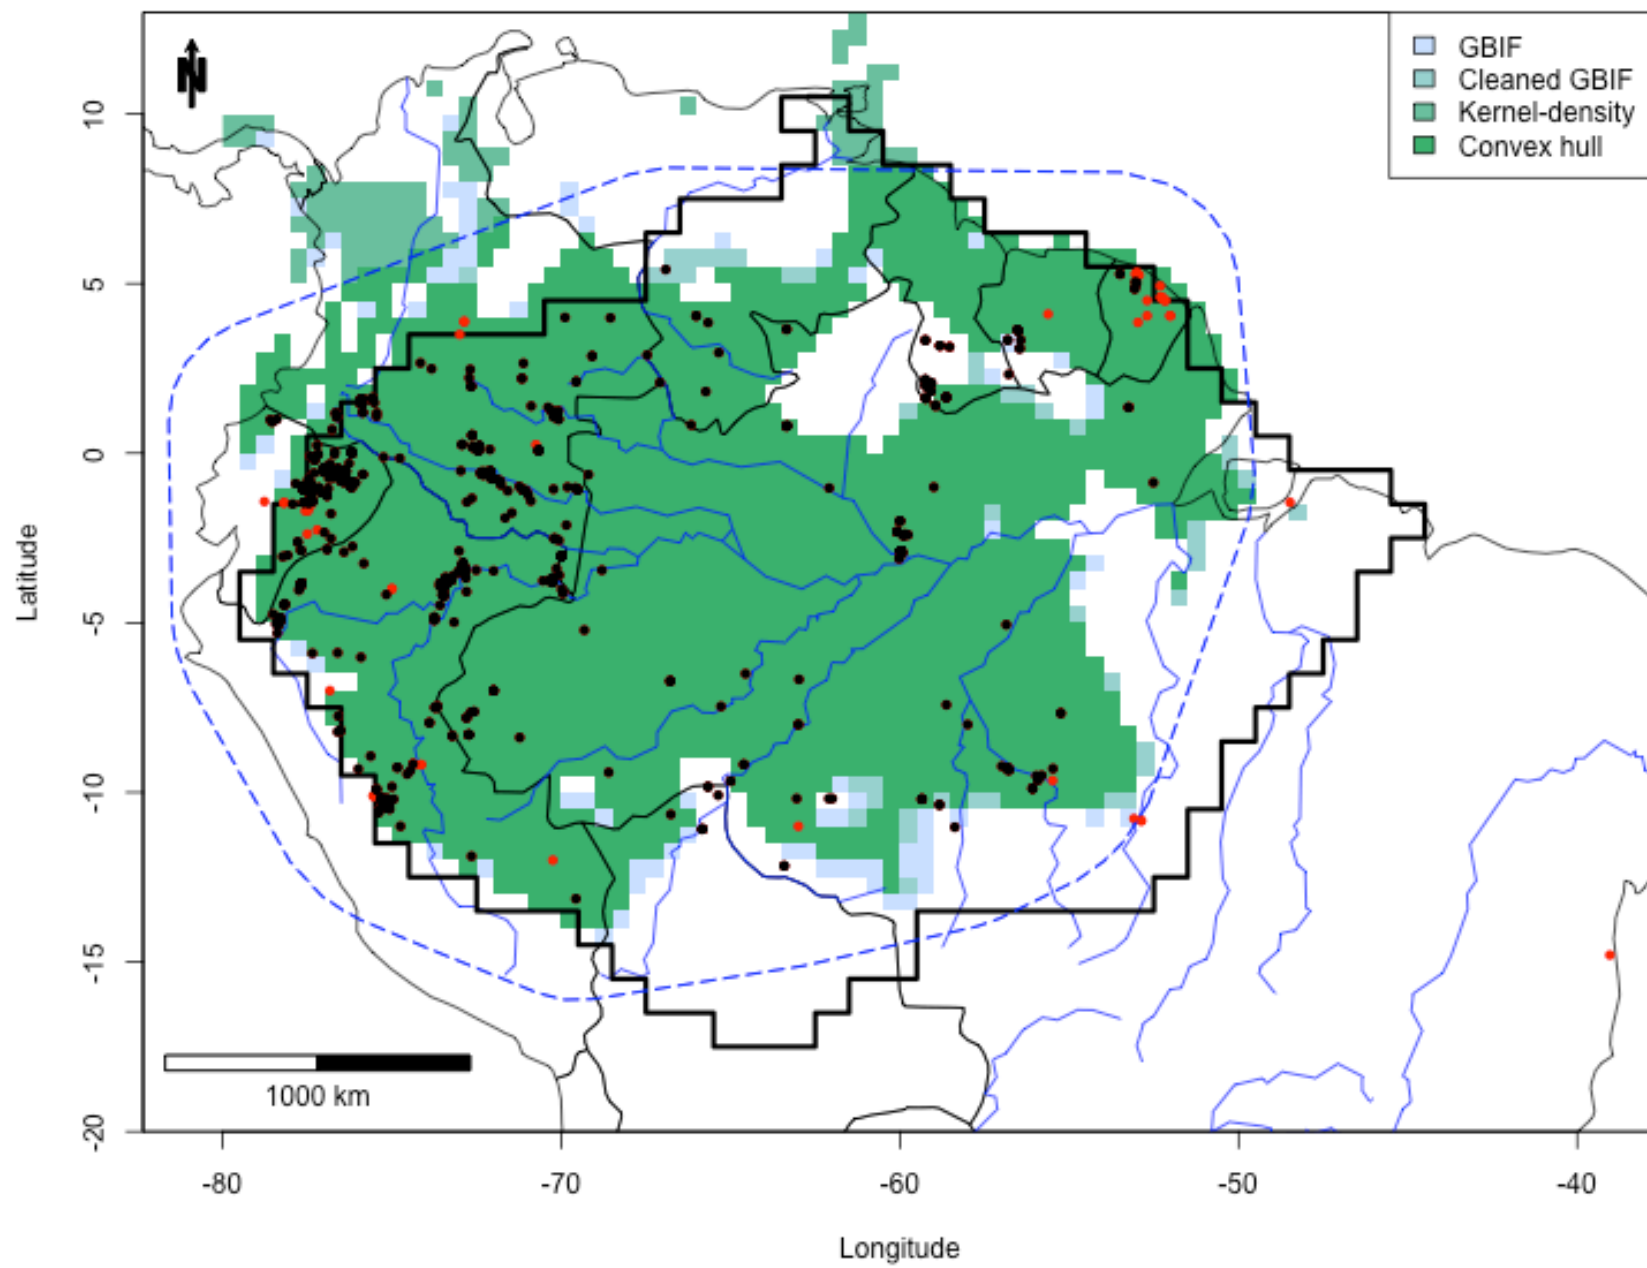

*Trattinnickia burserifolia*

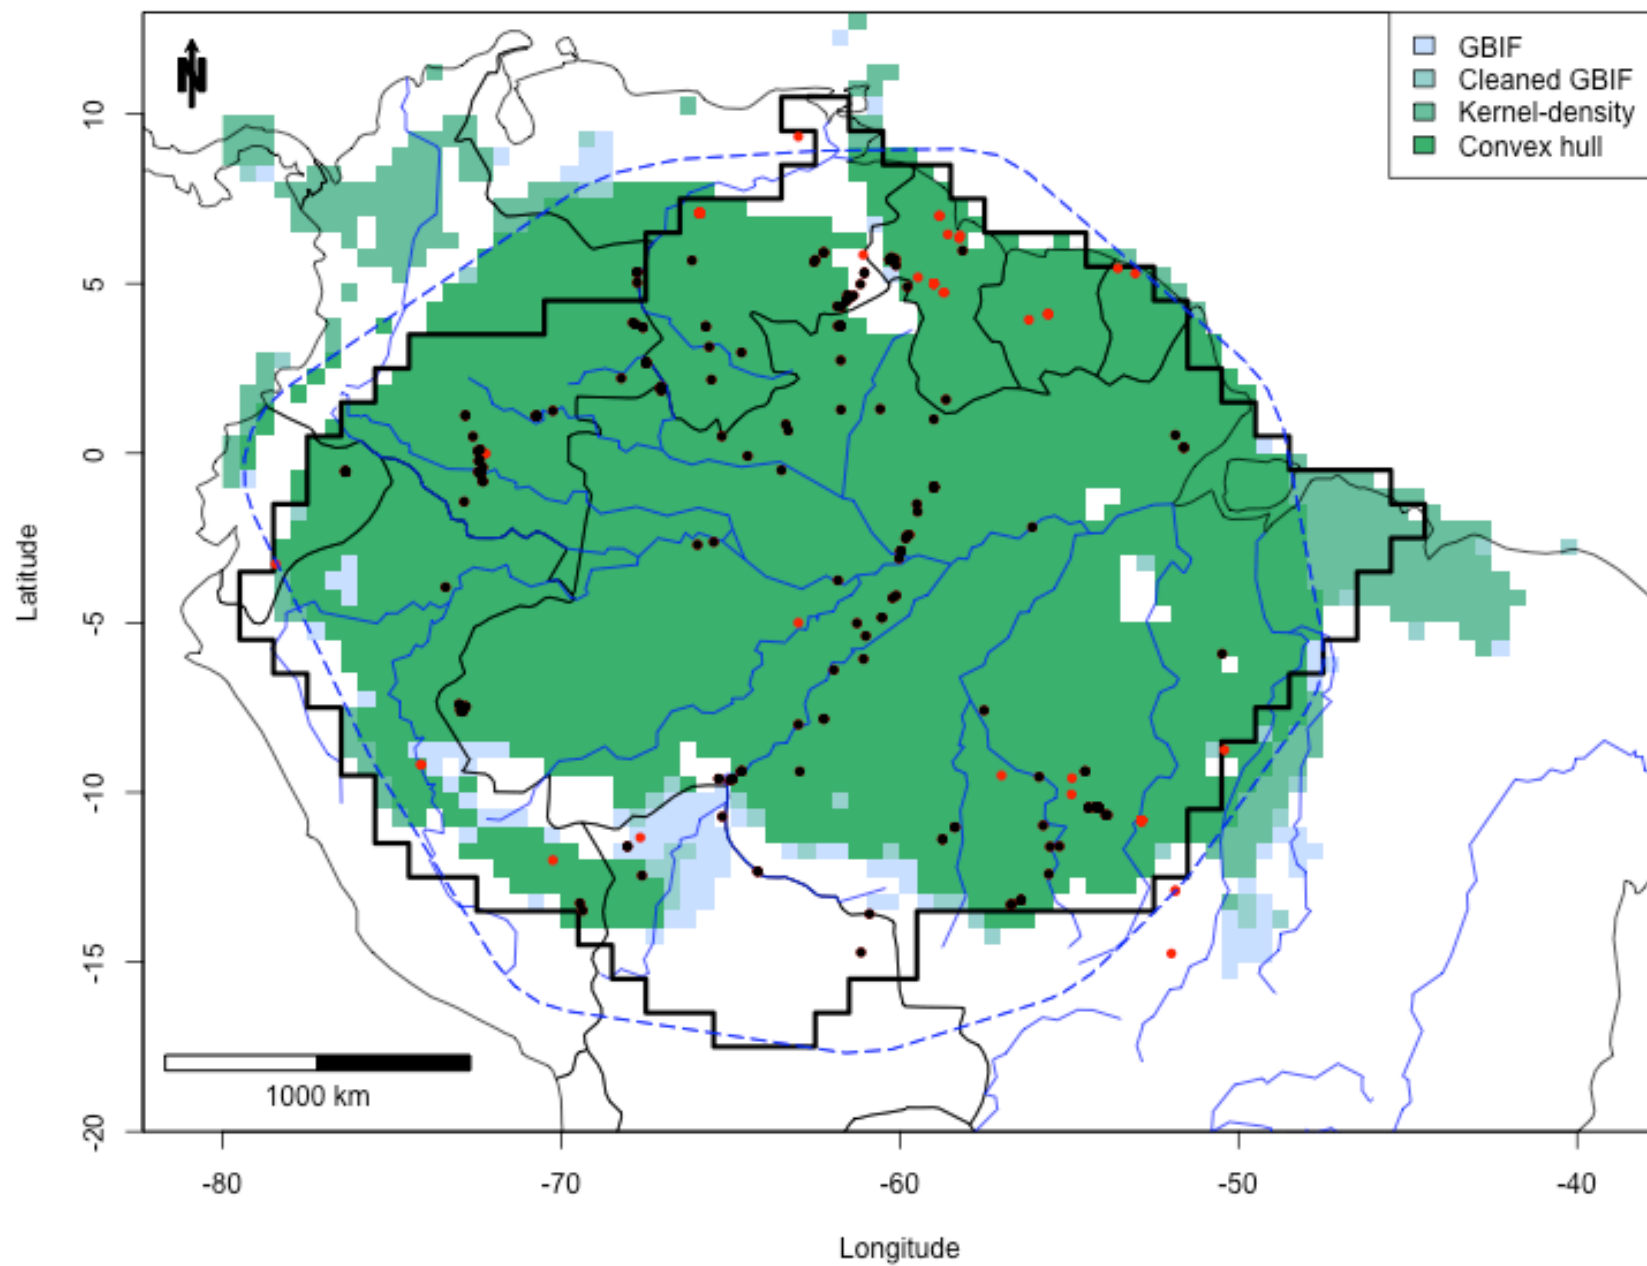

# Trichilia micrantha

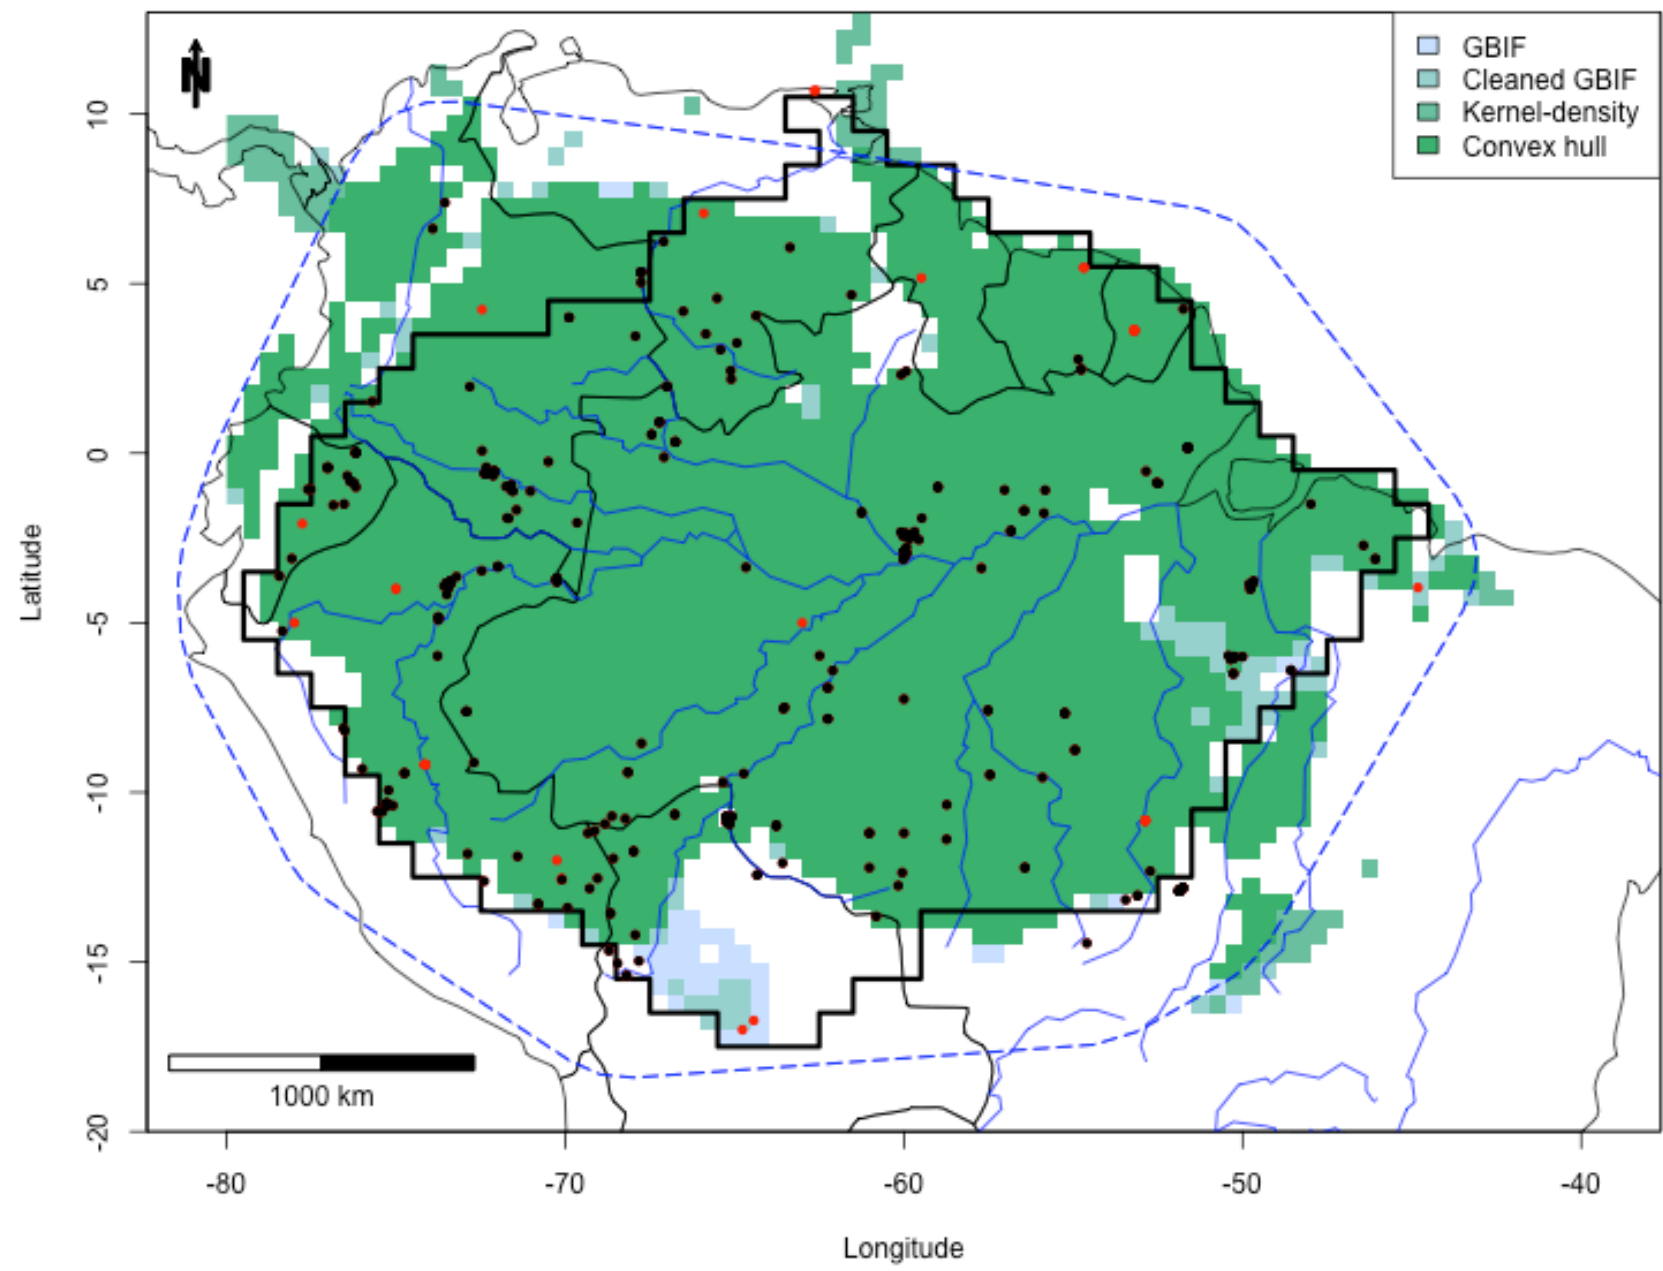

# Trichilia pleeana

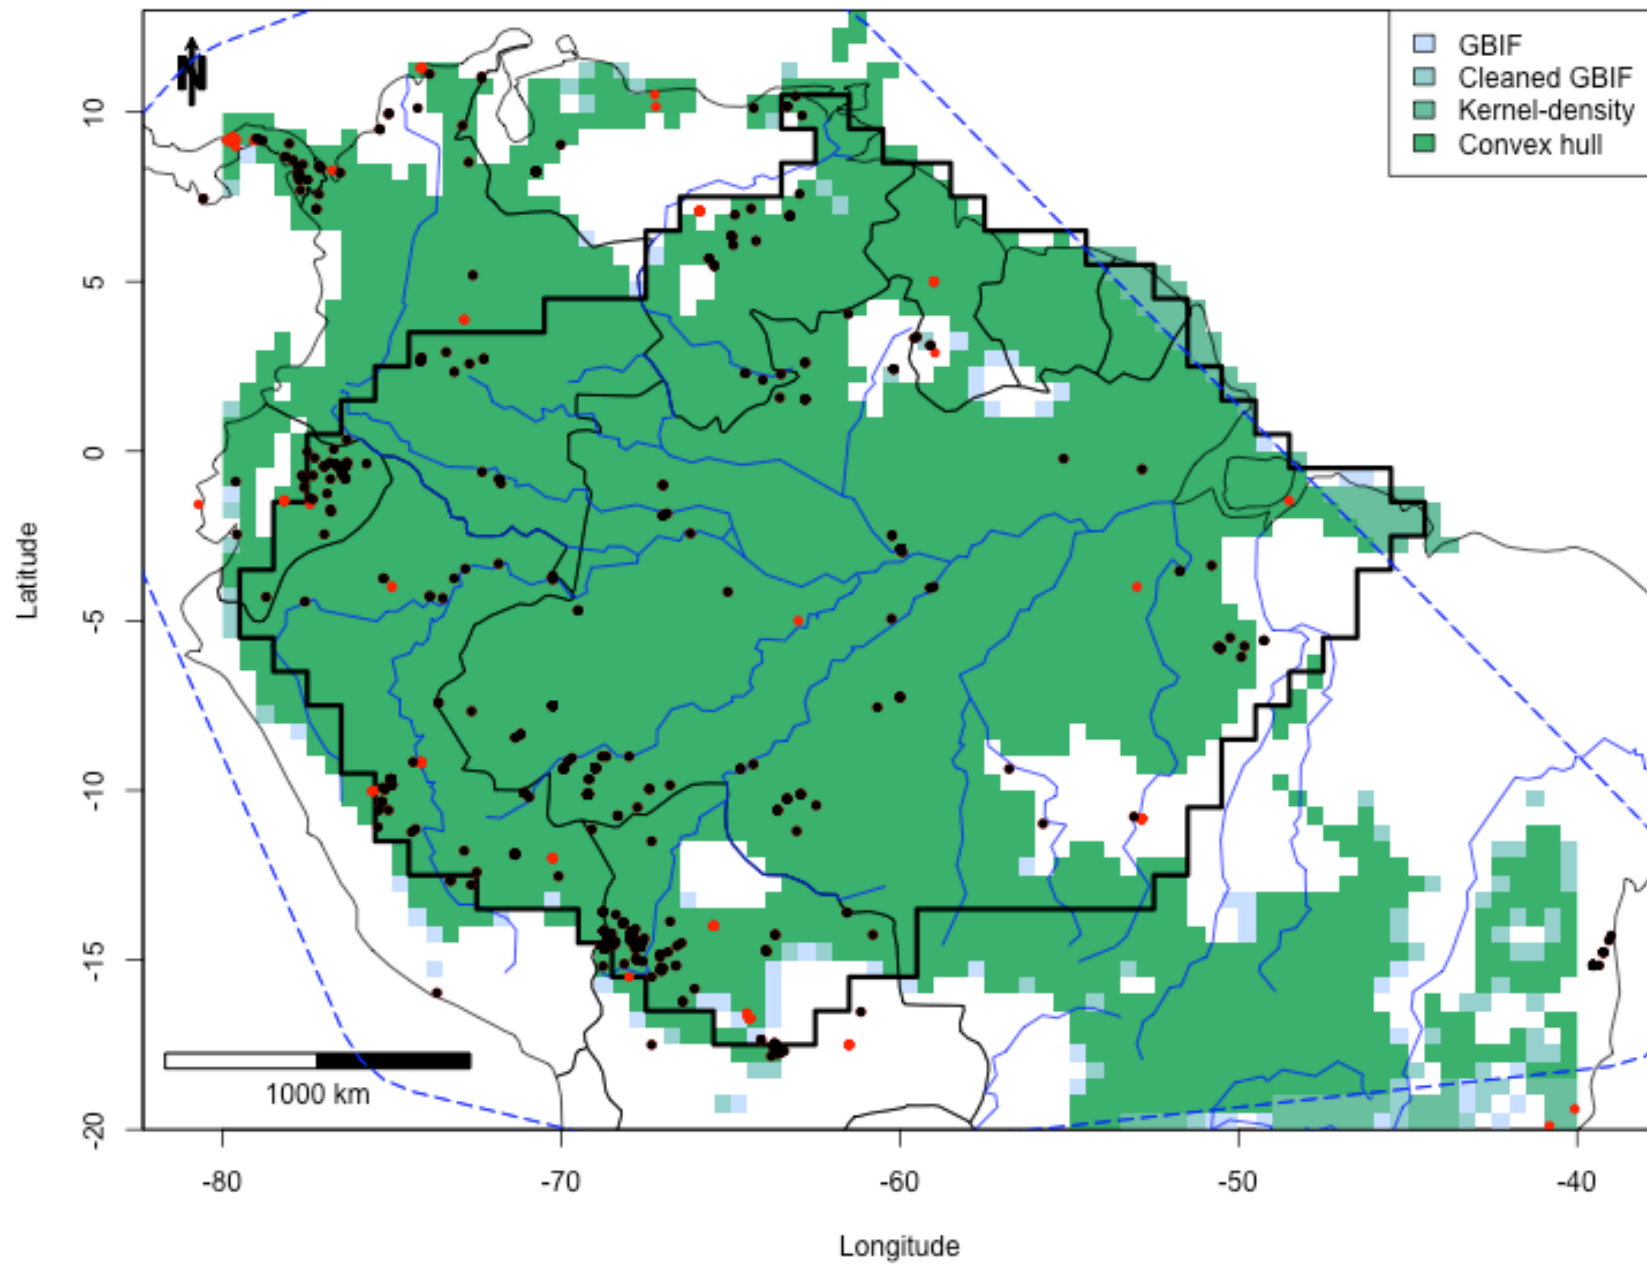

# Trichilia quadrijuga

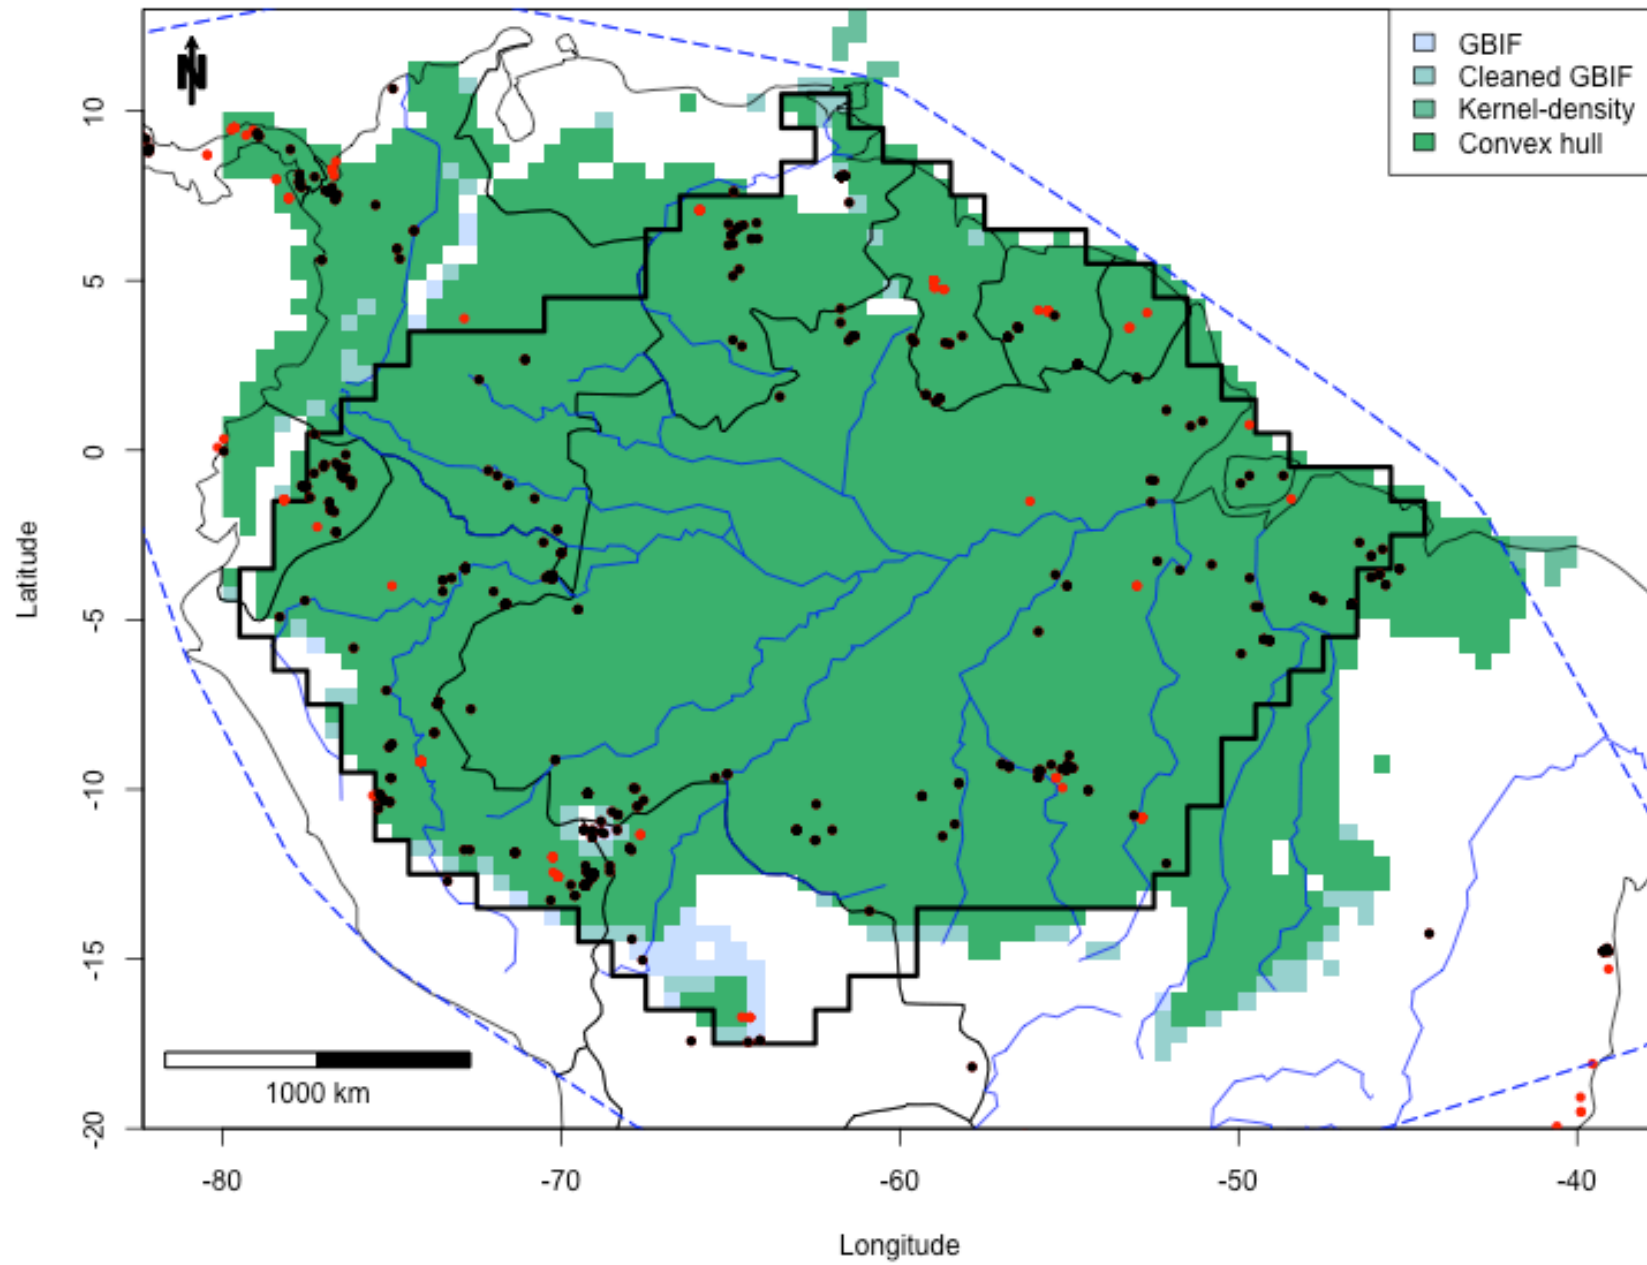



# Triplaris weigeltiana

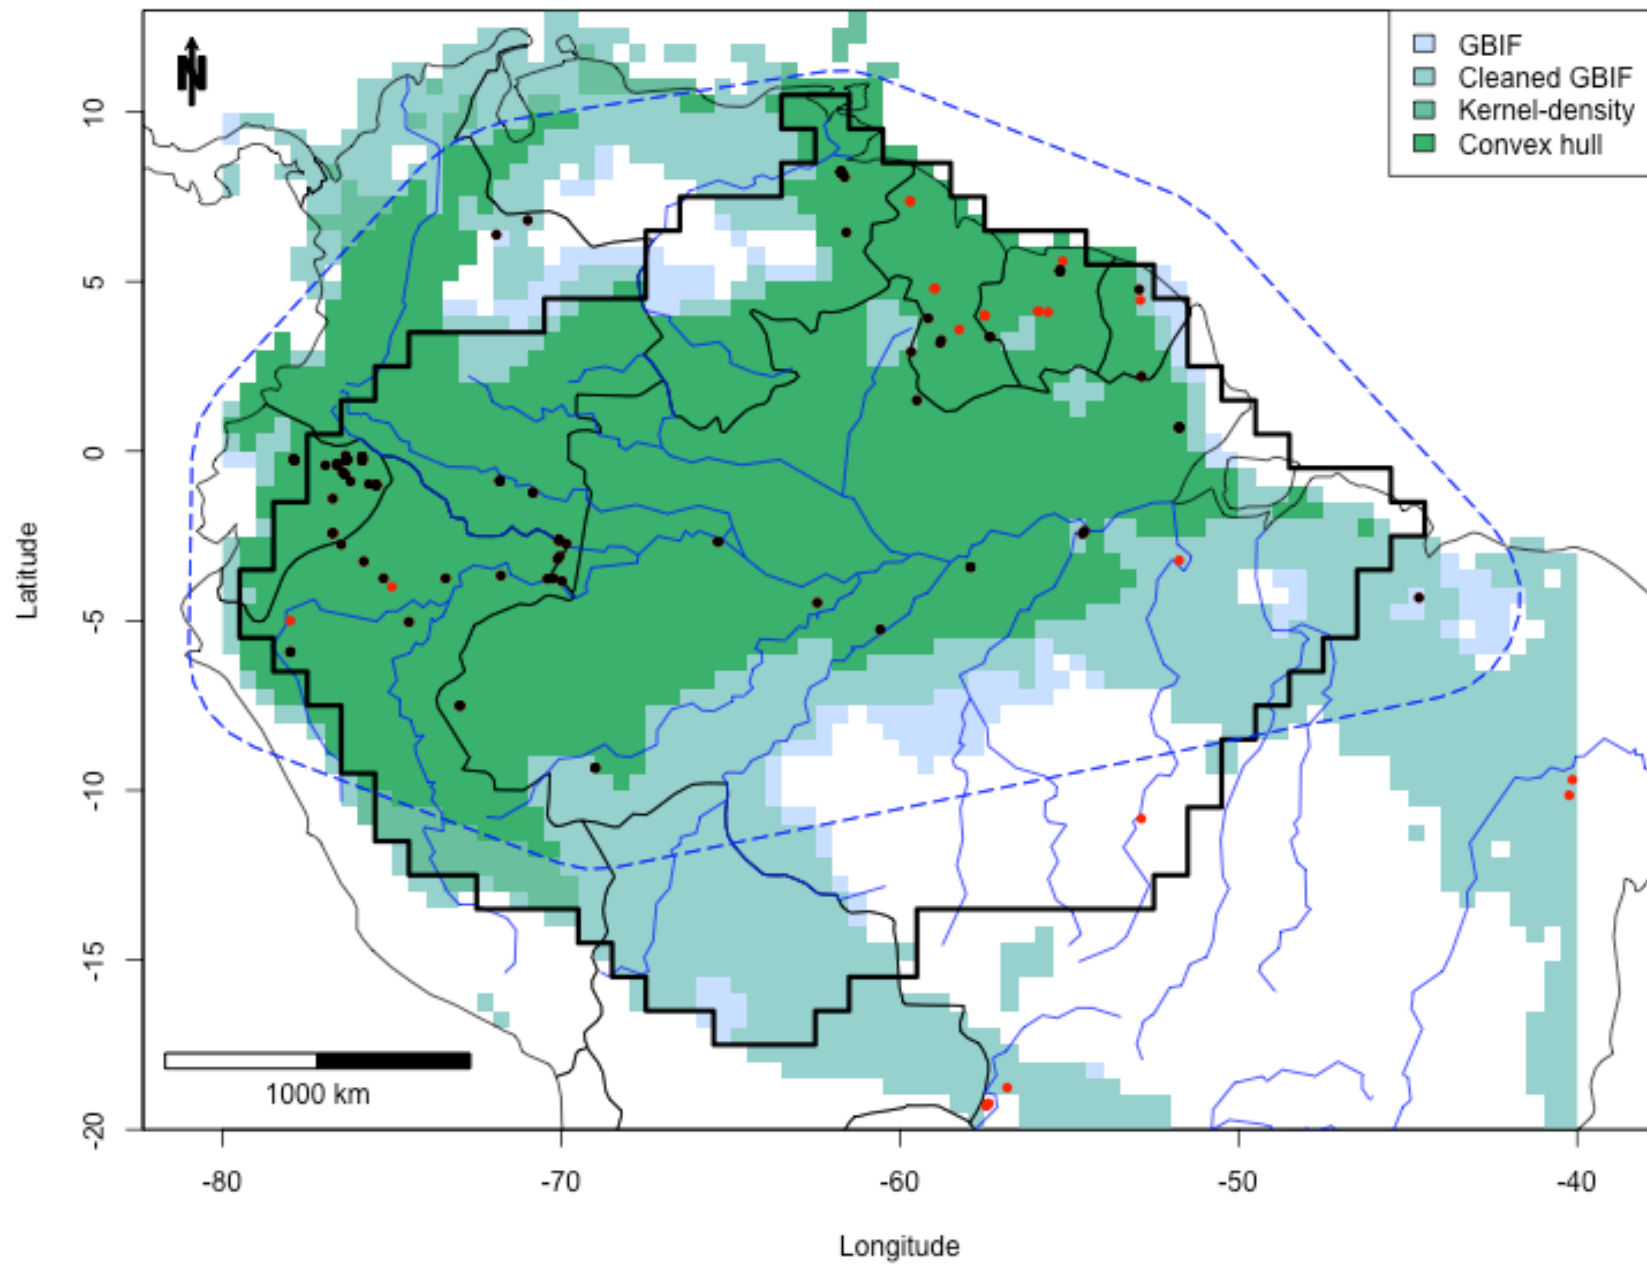

# Unonopsis guatterioides

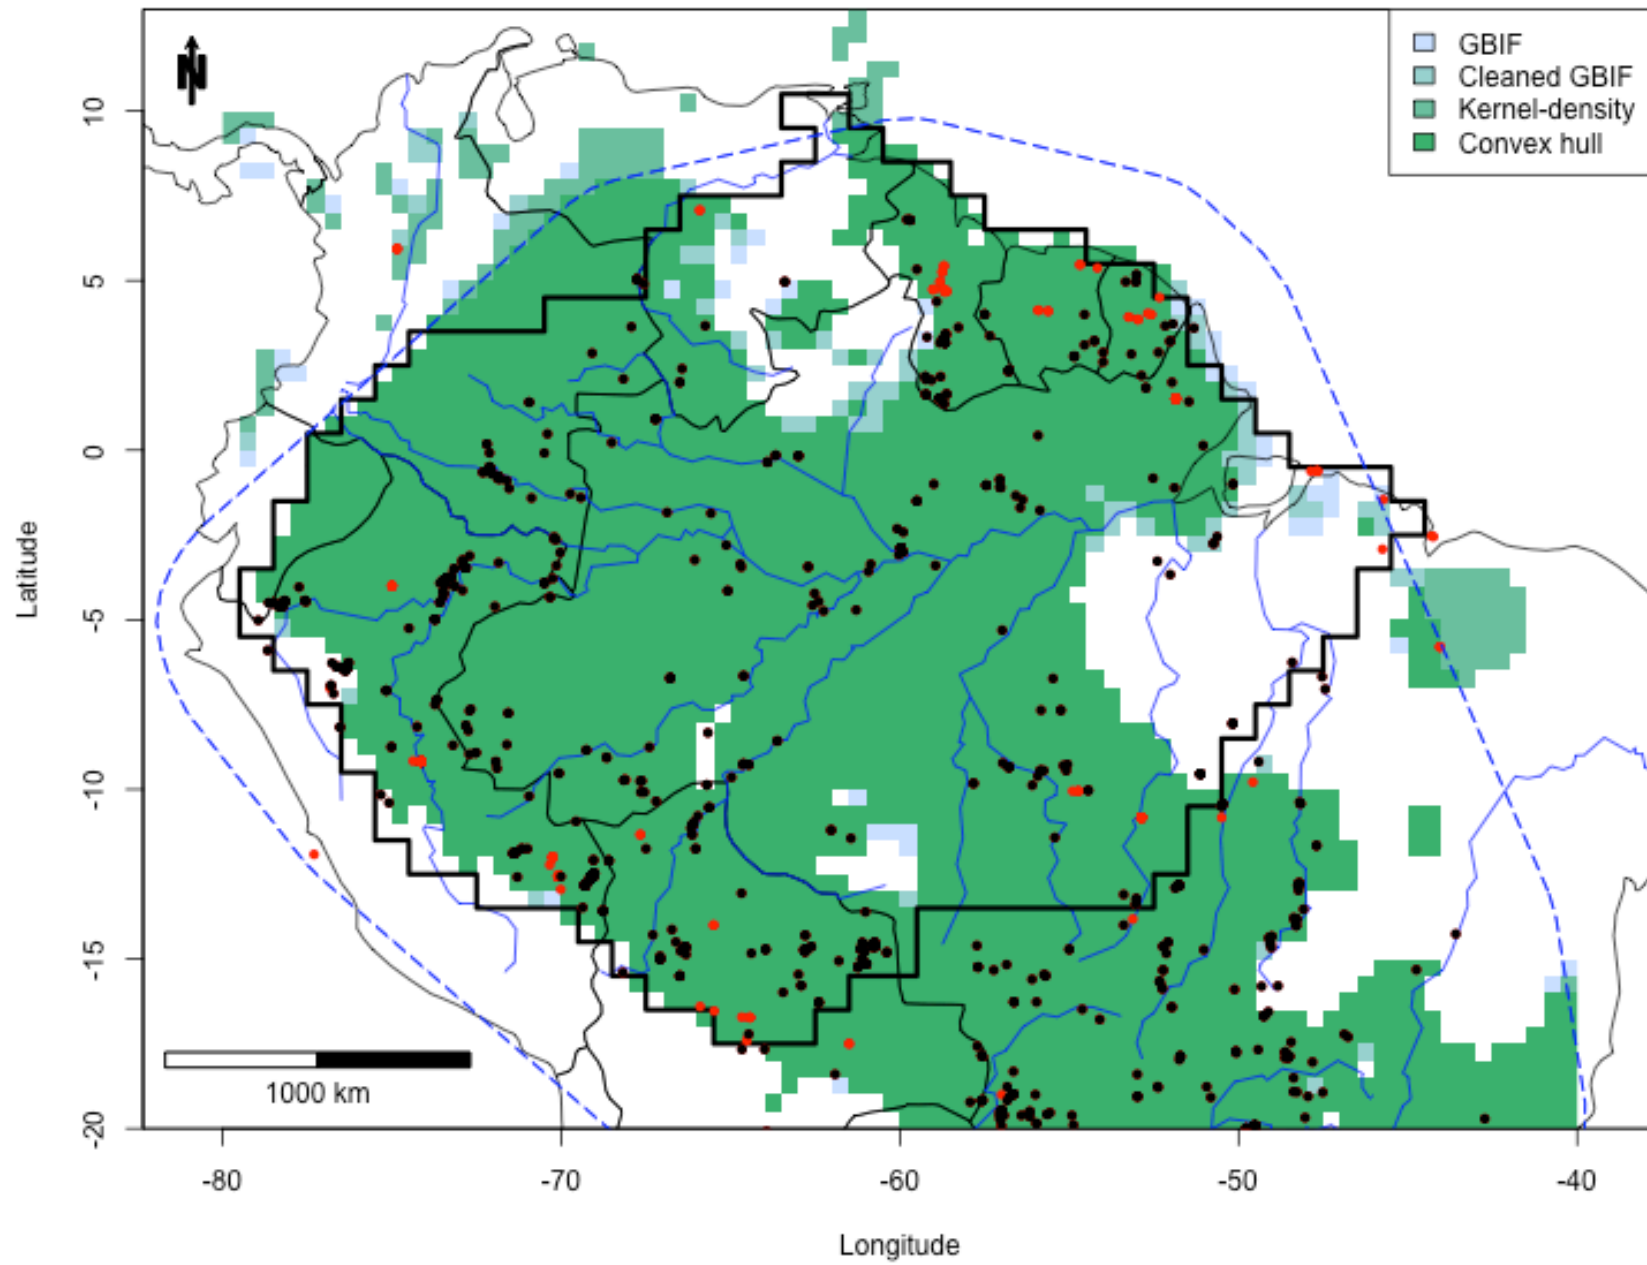

# Vatairea guianensis

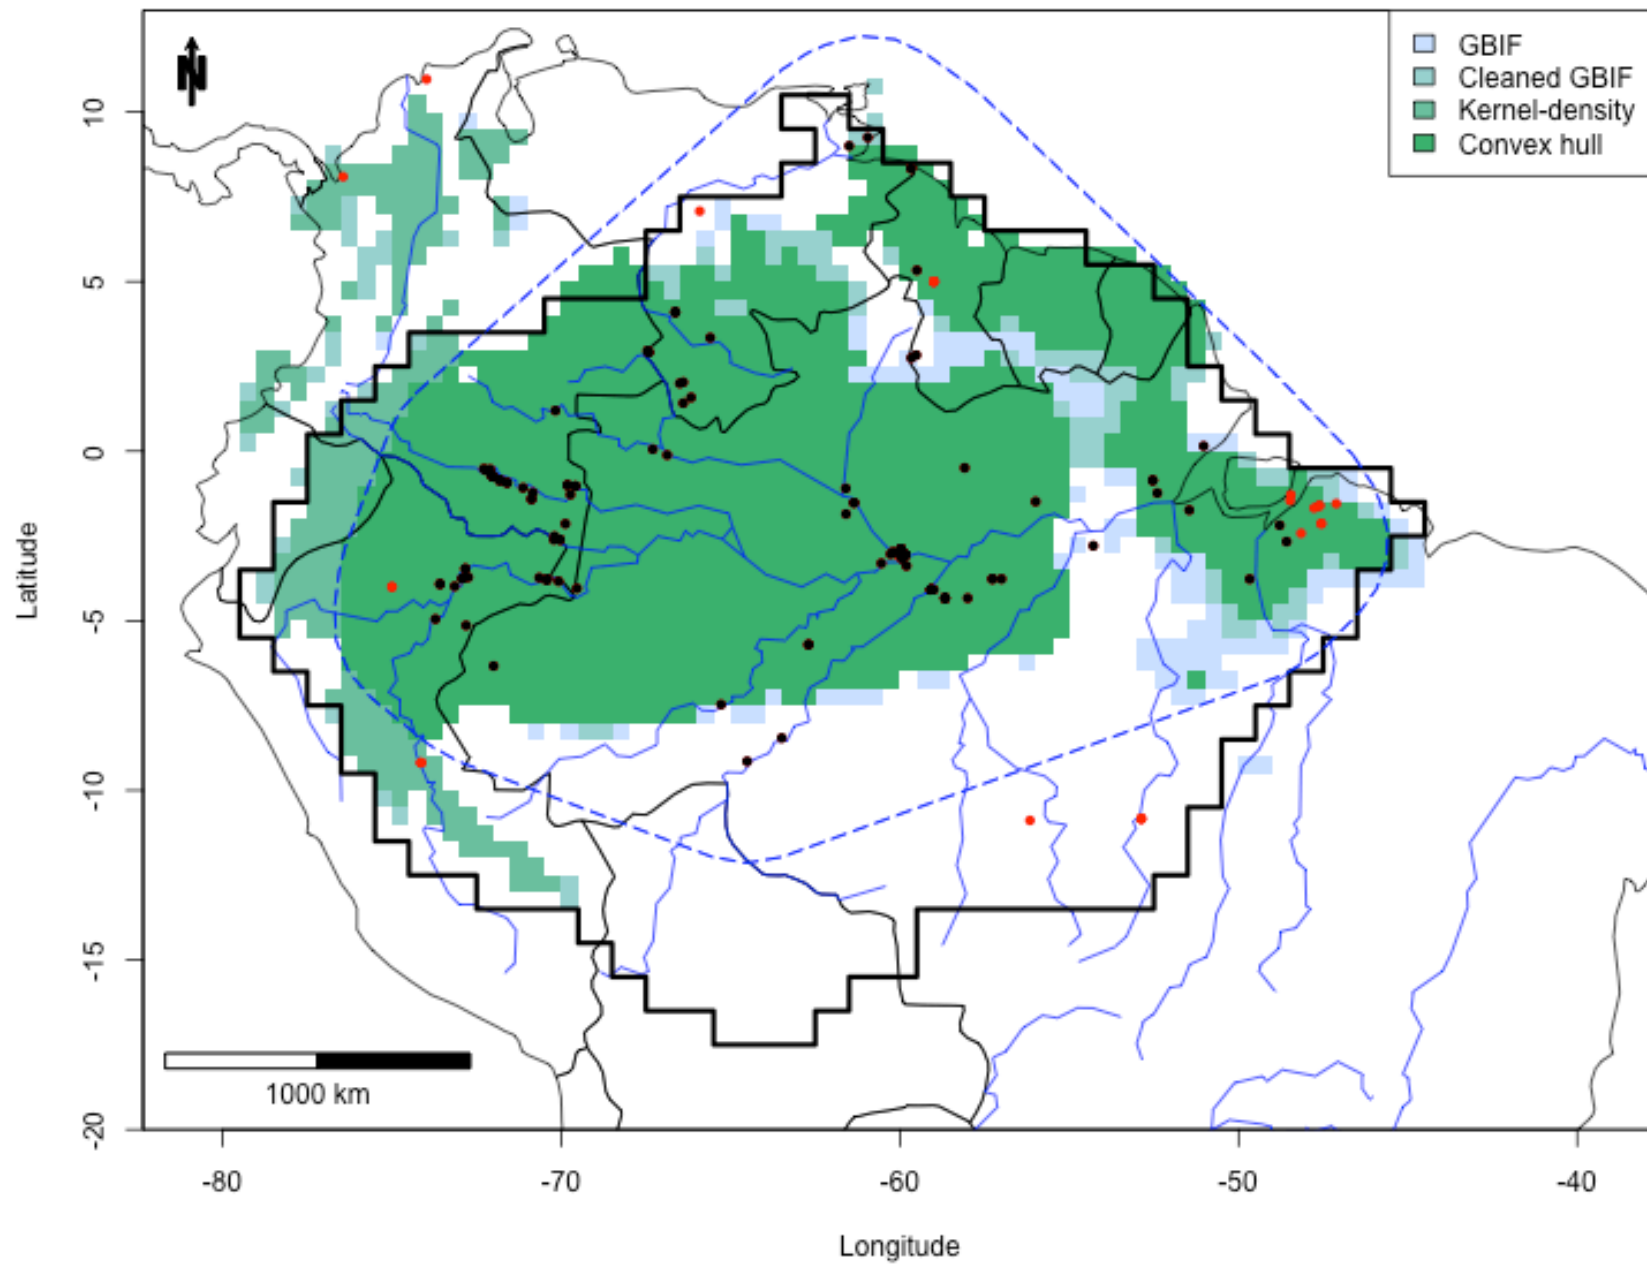

# *Virola calophylla*

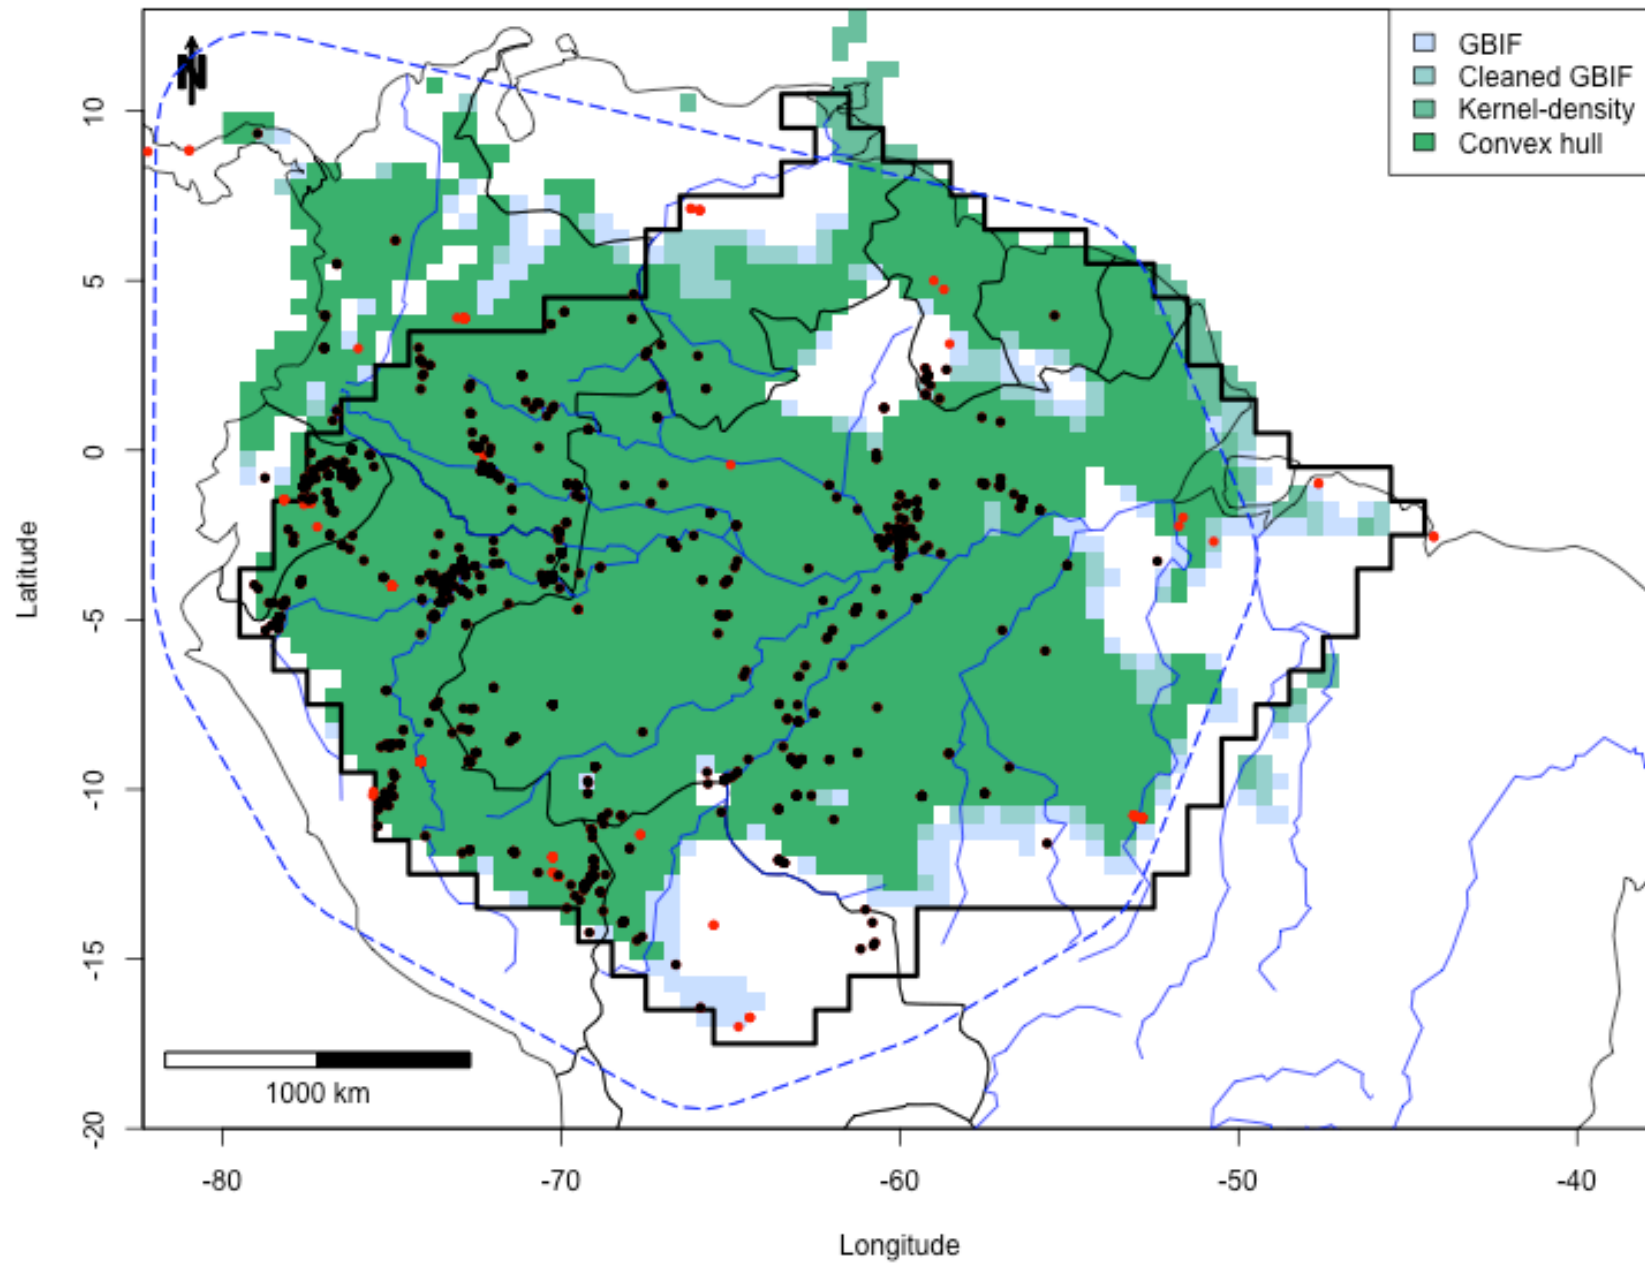

# *Virola elongata*

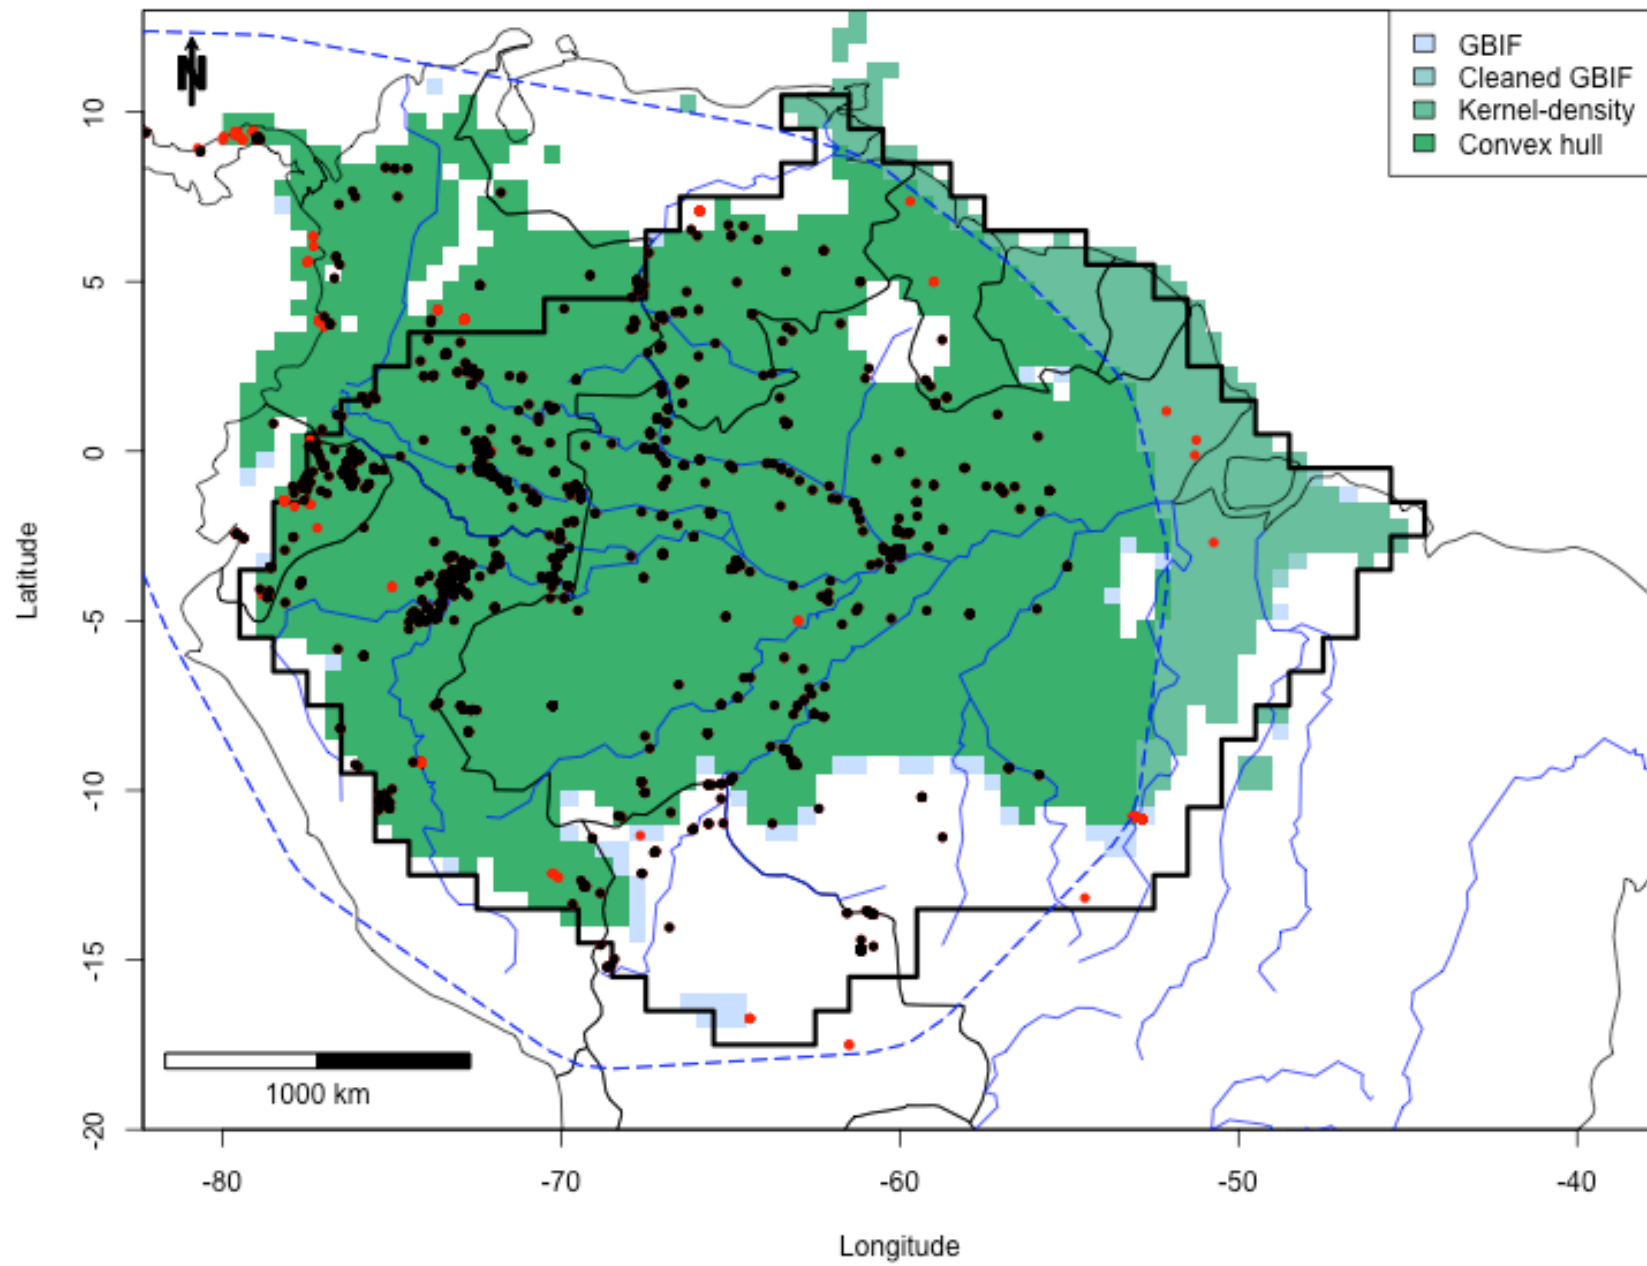

# *Virola michelii*

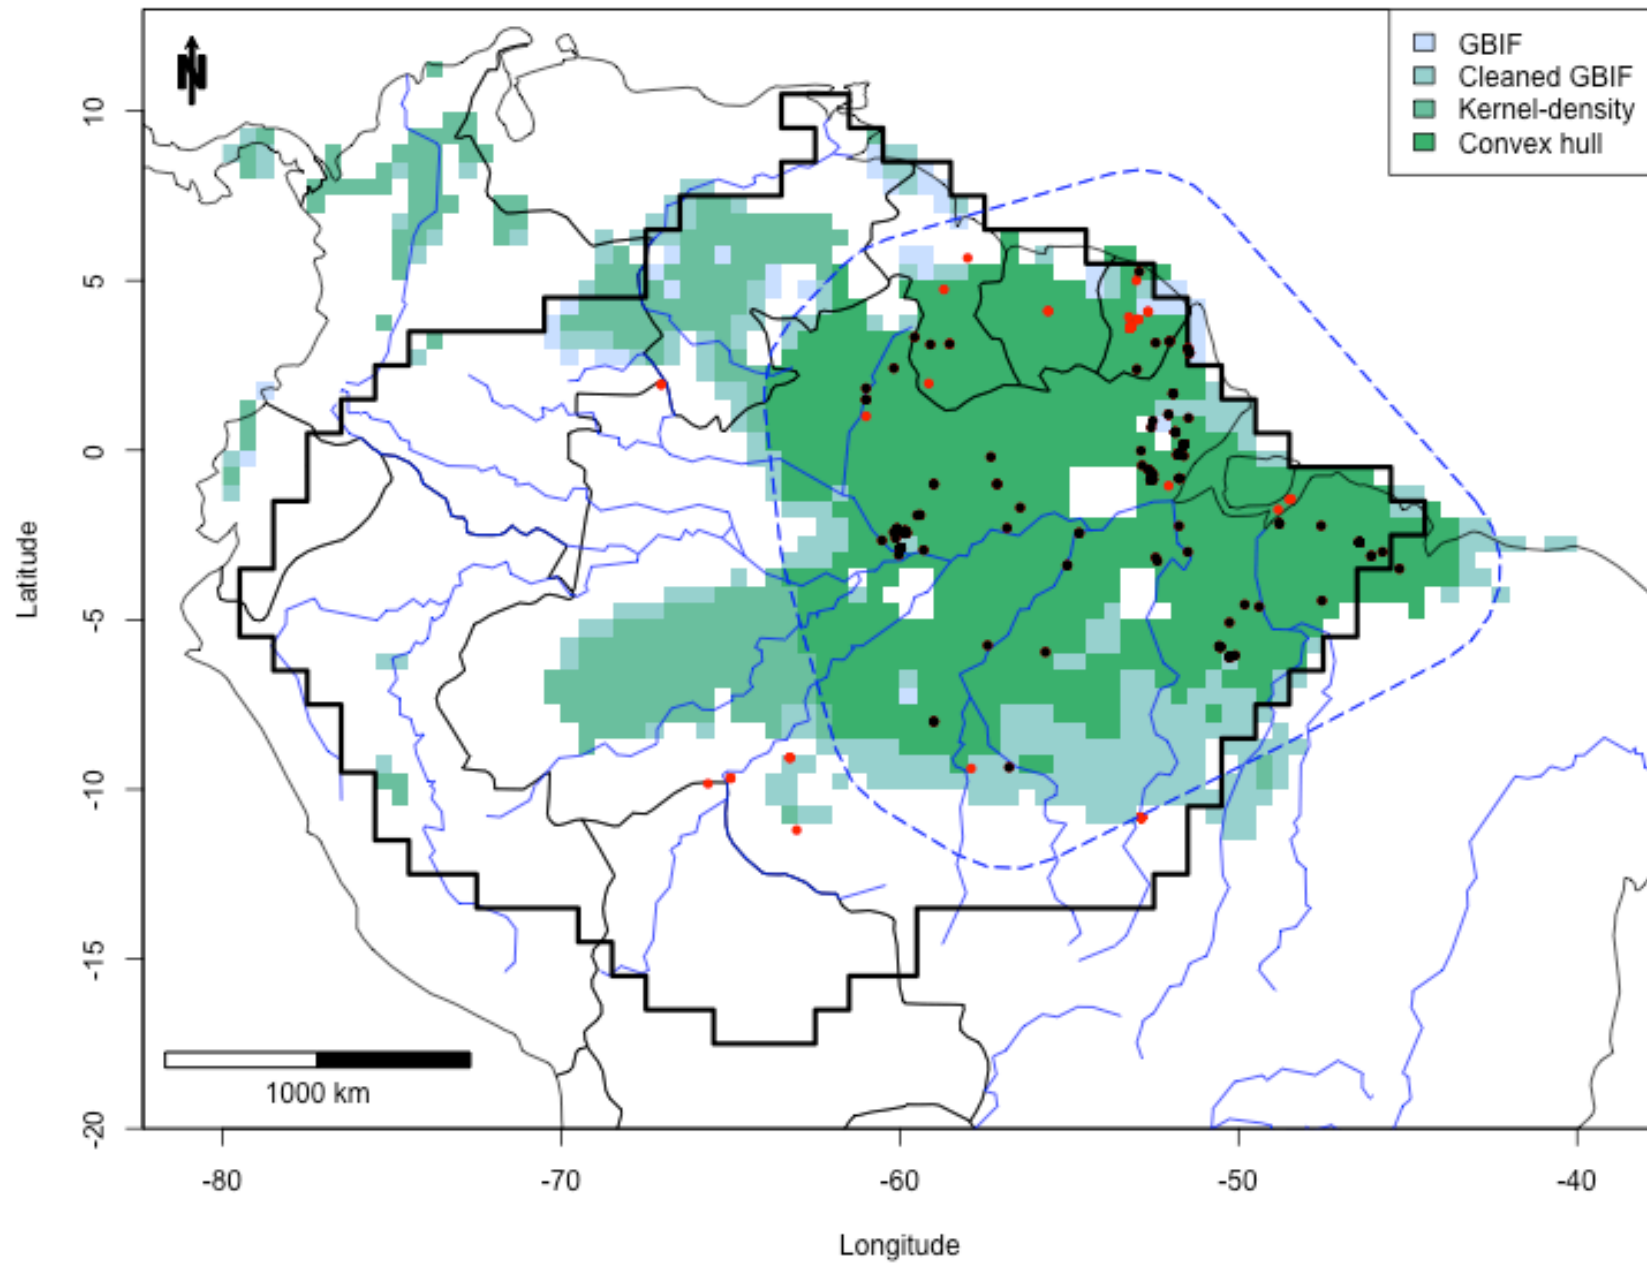

# *Viola pavonis*

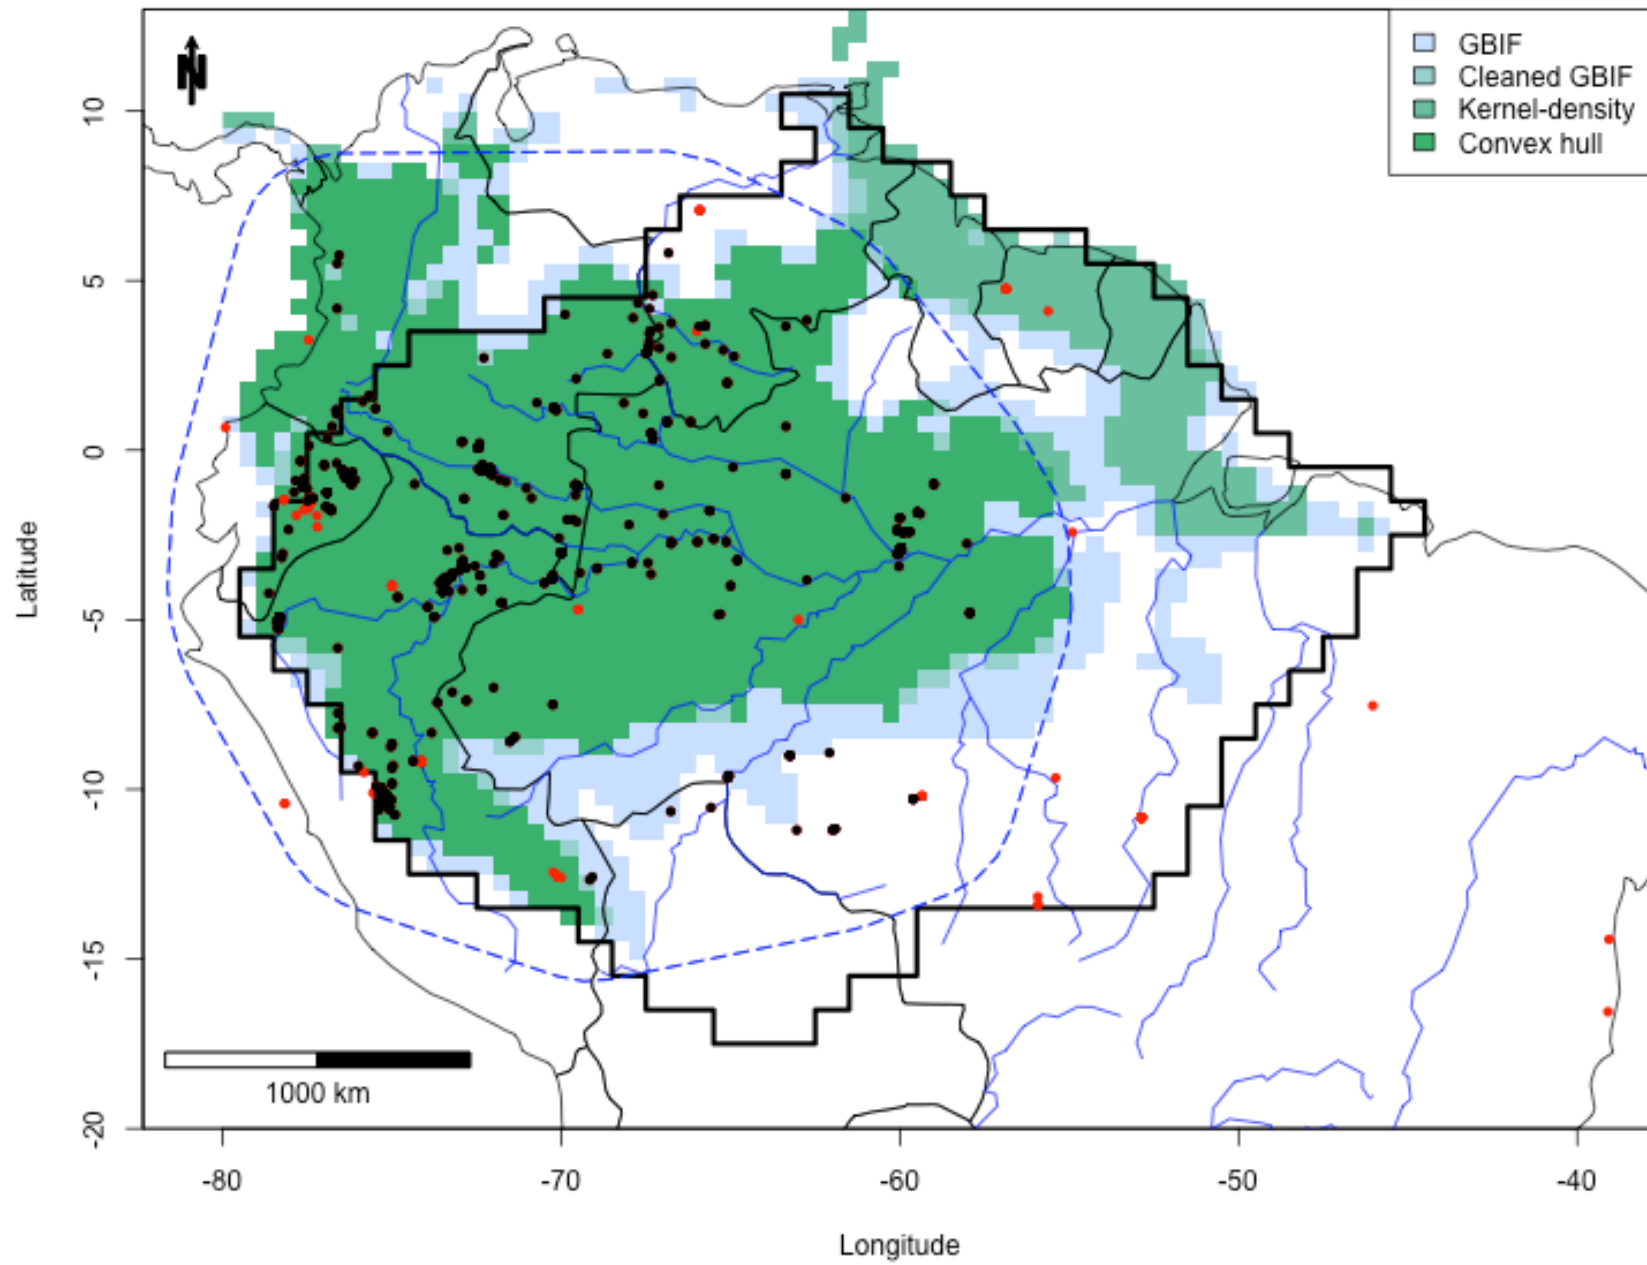



# *Virola sebifera*

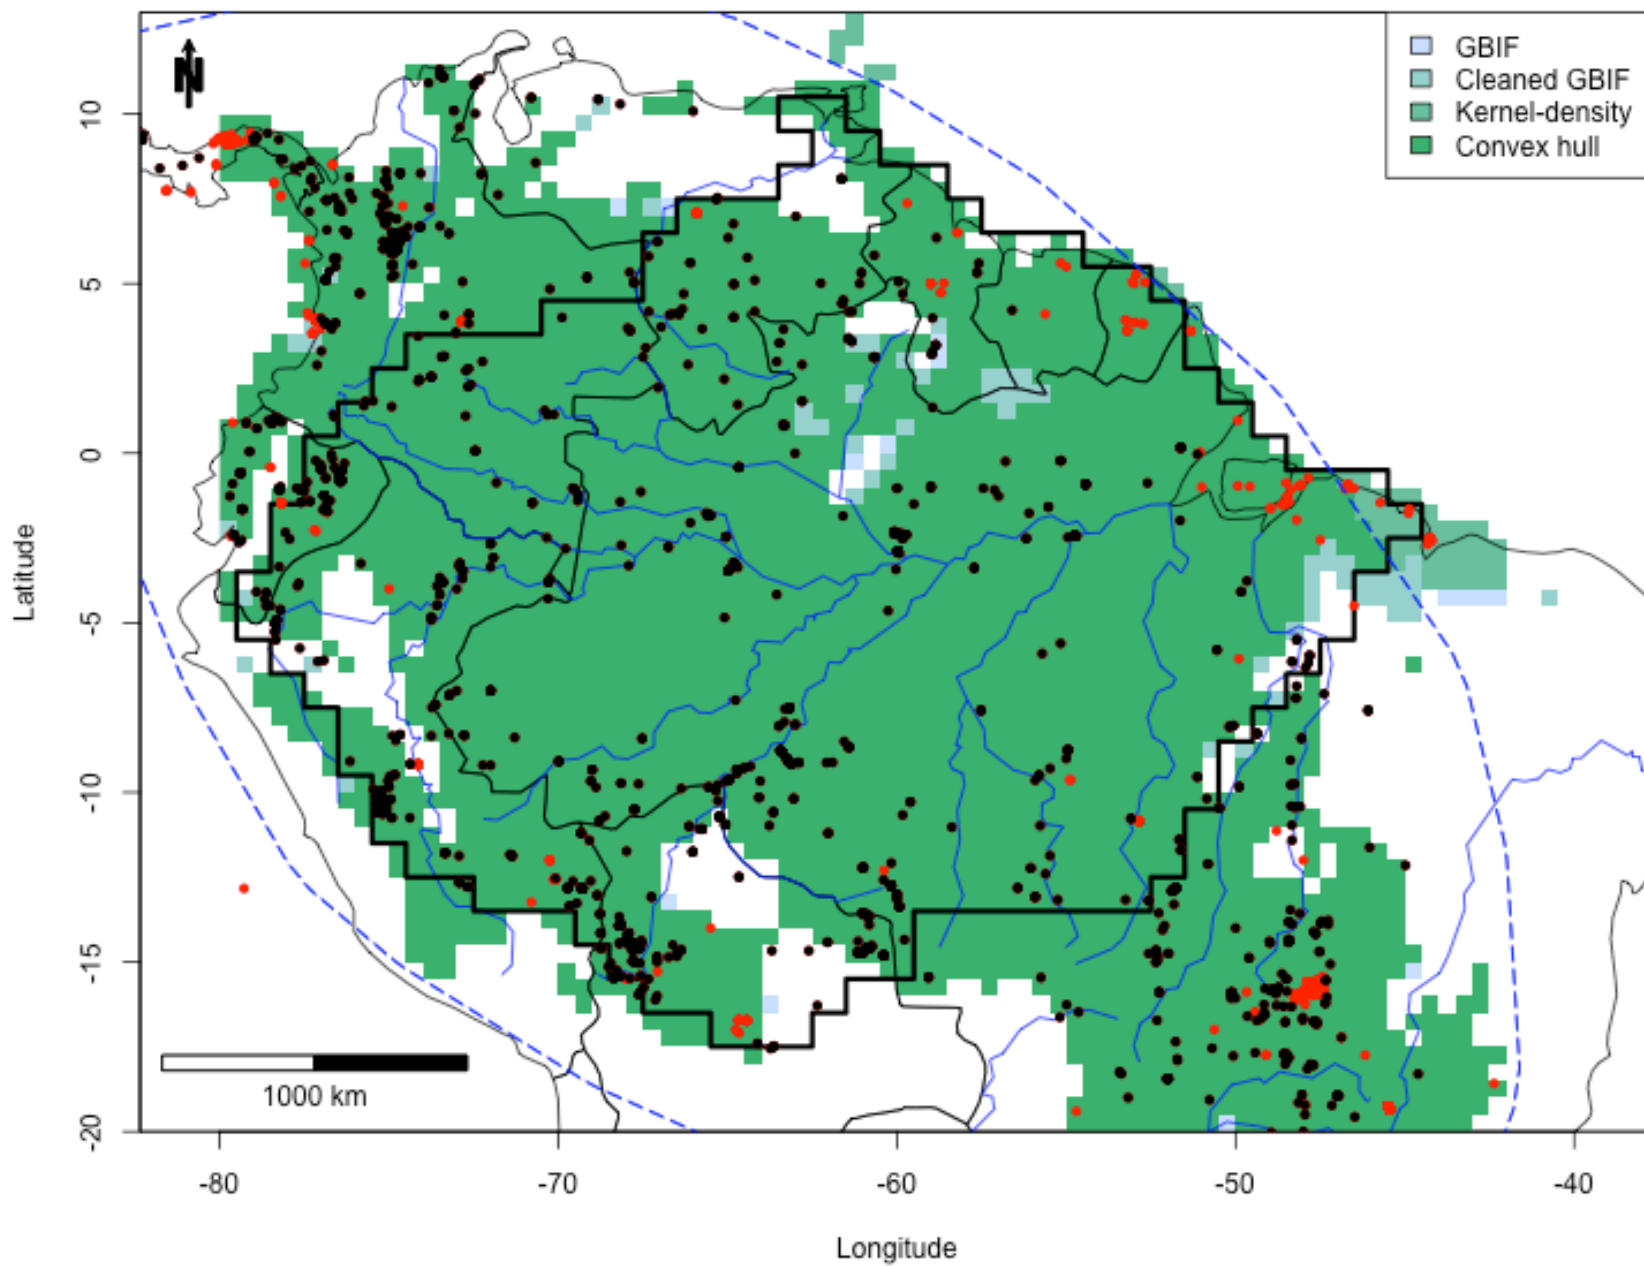

# *Virola surinamensis*

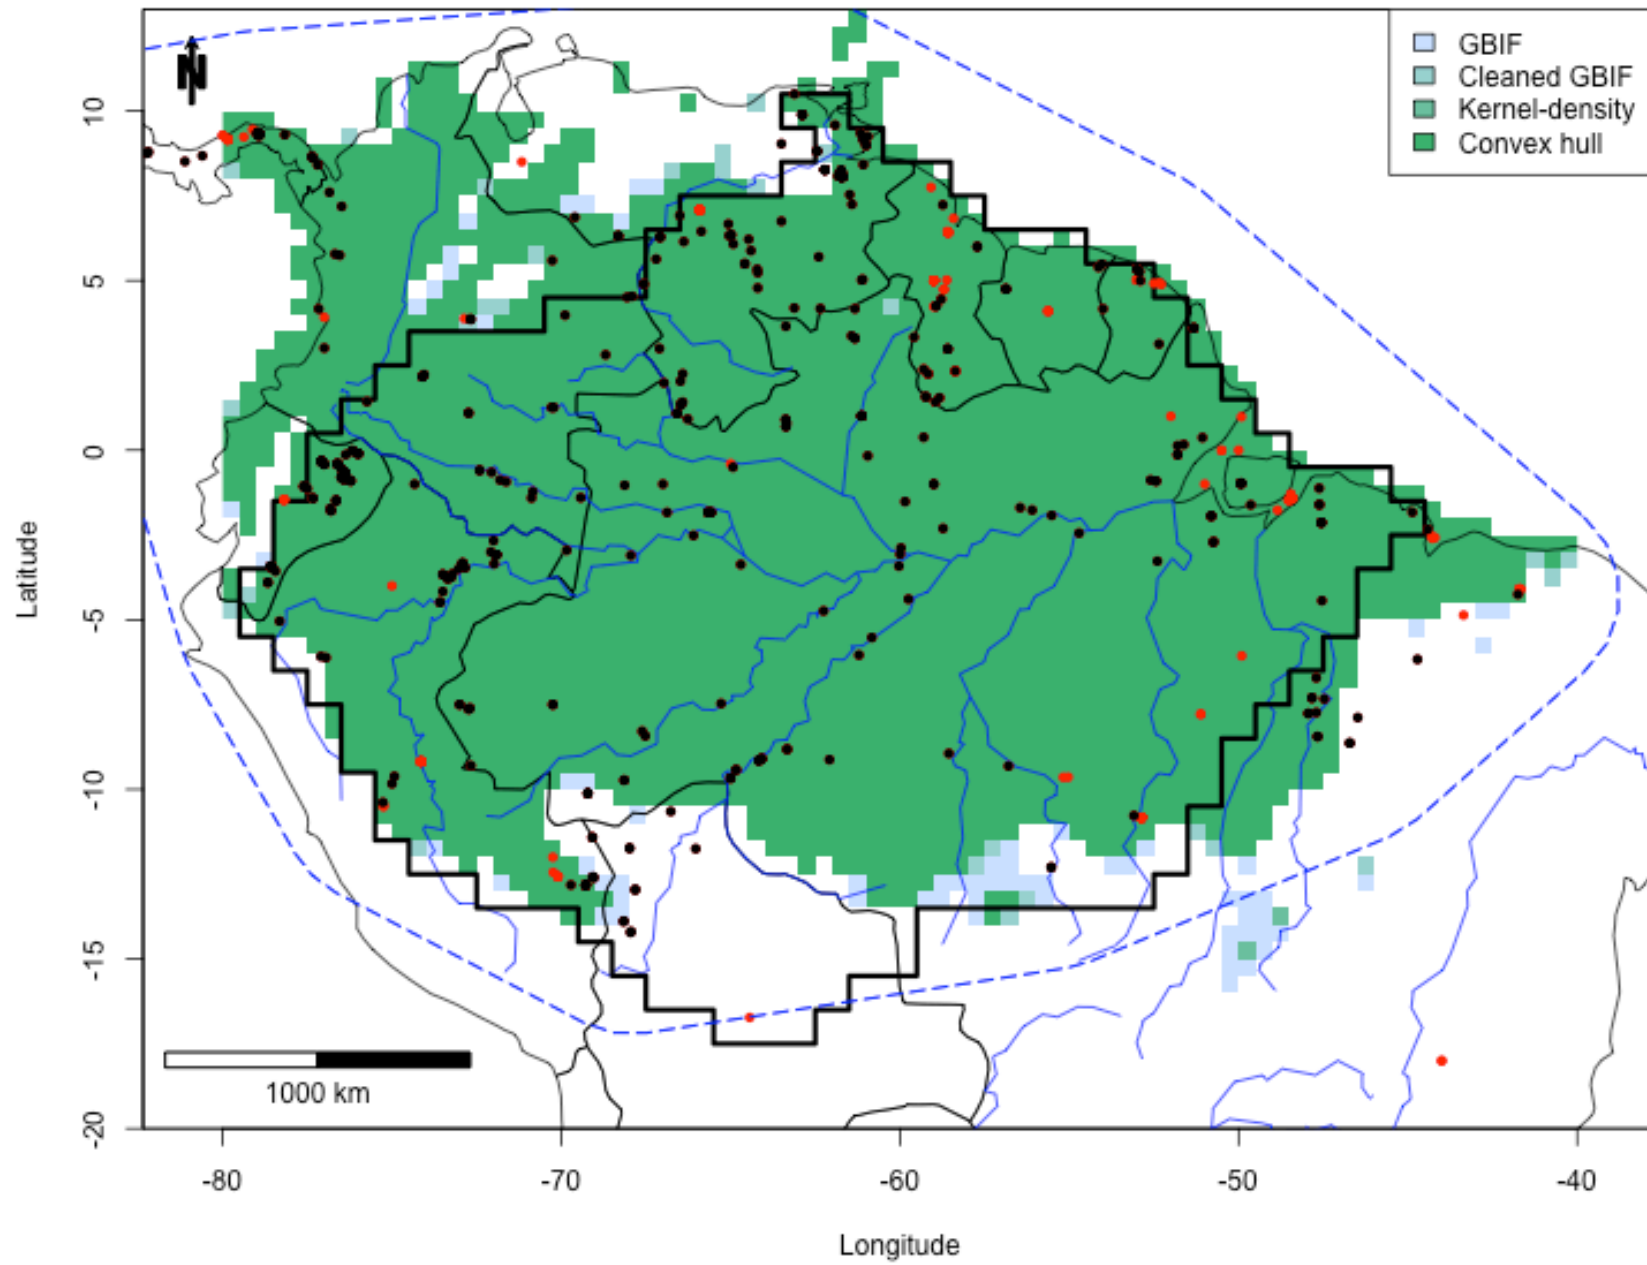

# Vitex cymosa

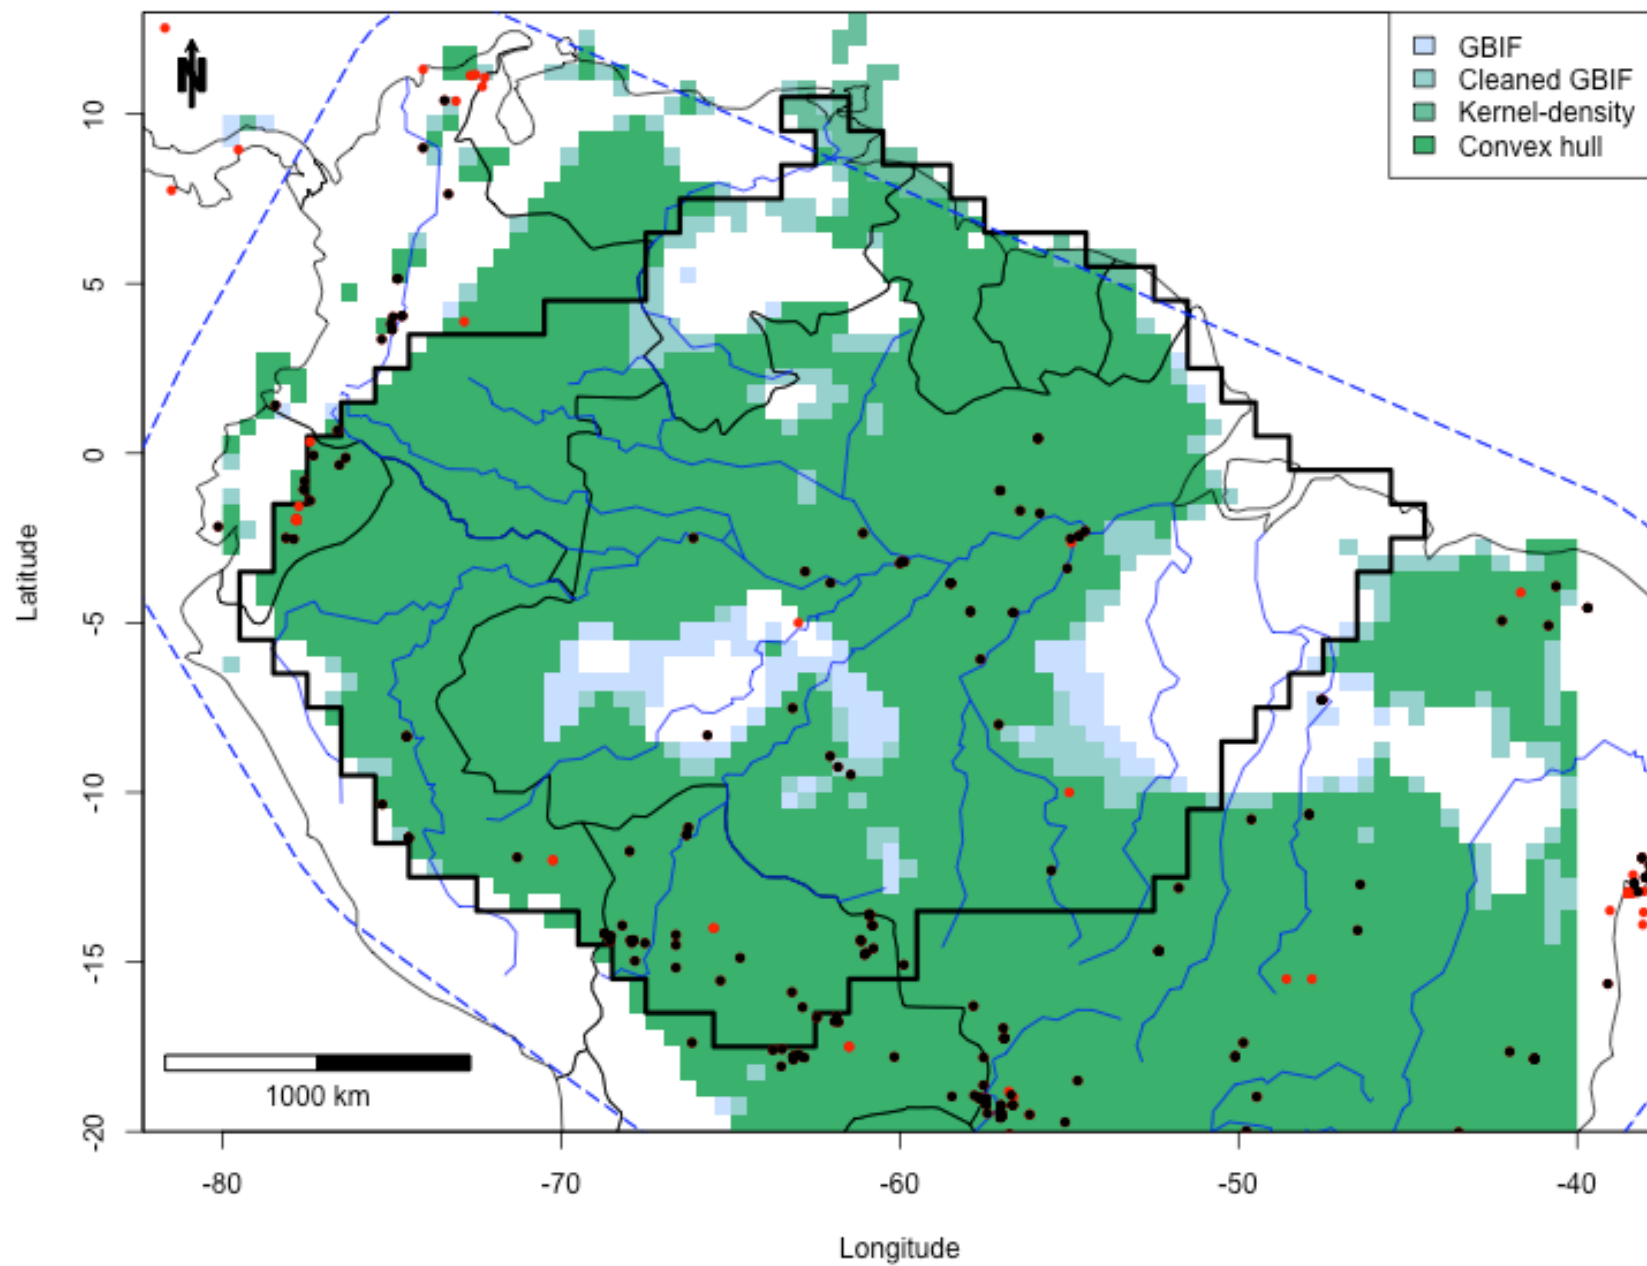

# Vouacapoua americana

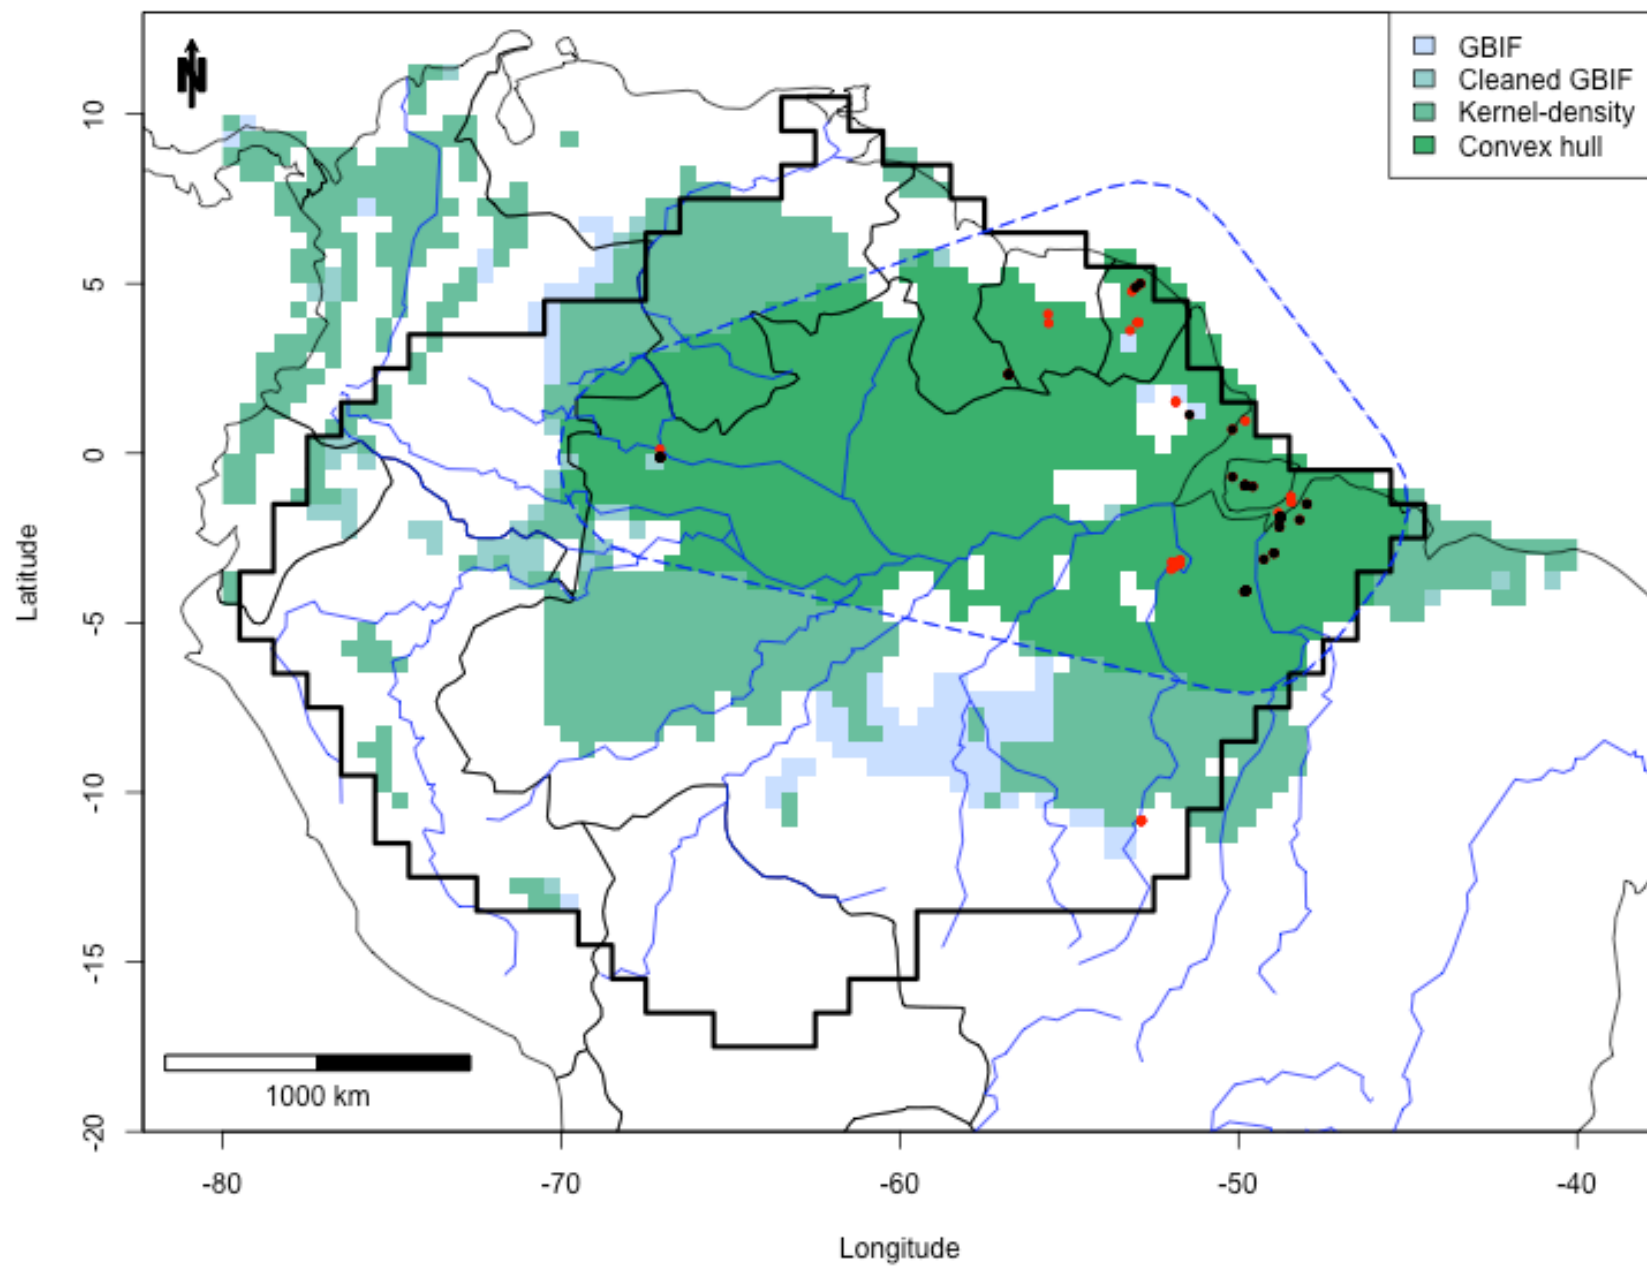

# *Xylopia amazonica*

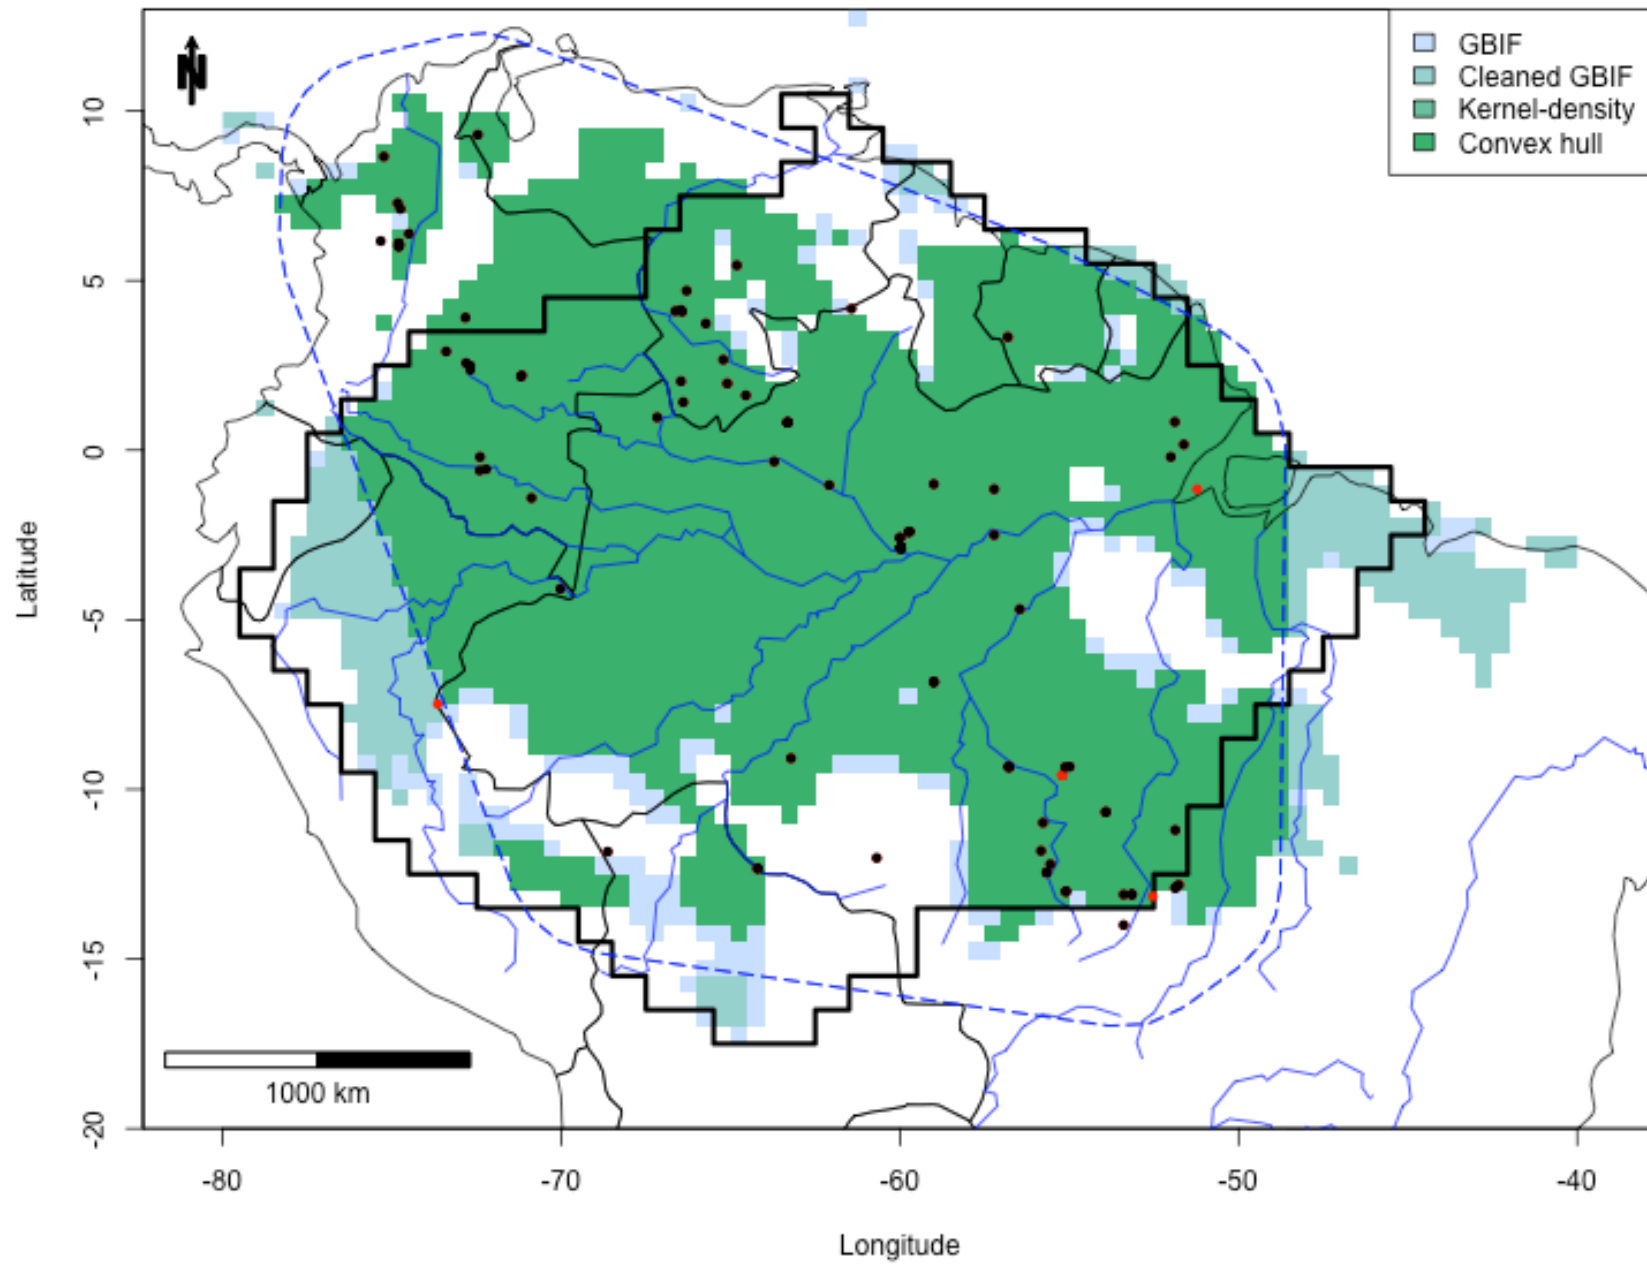

# Zygia cataractae

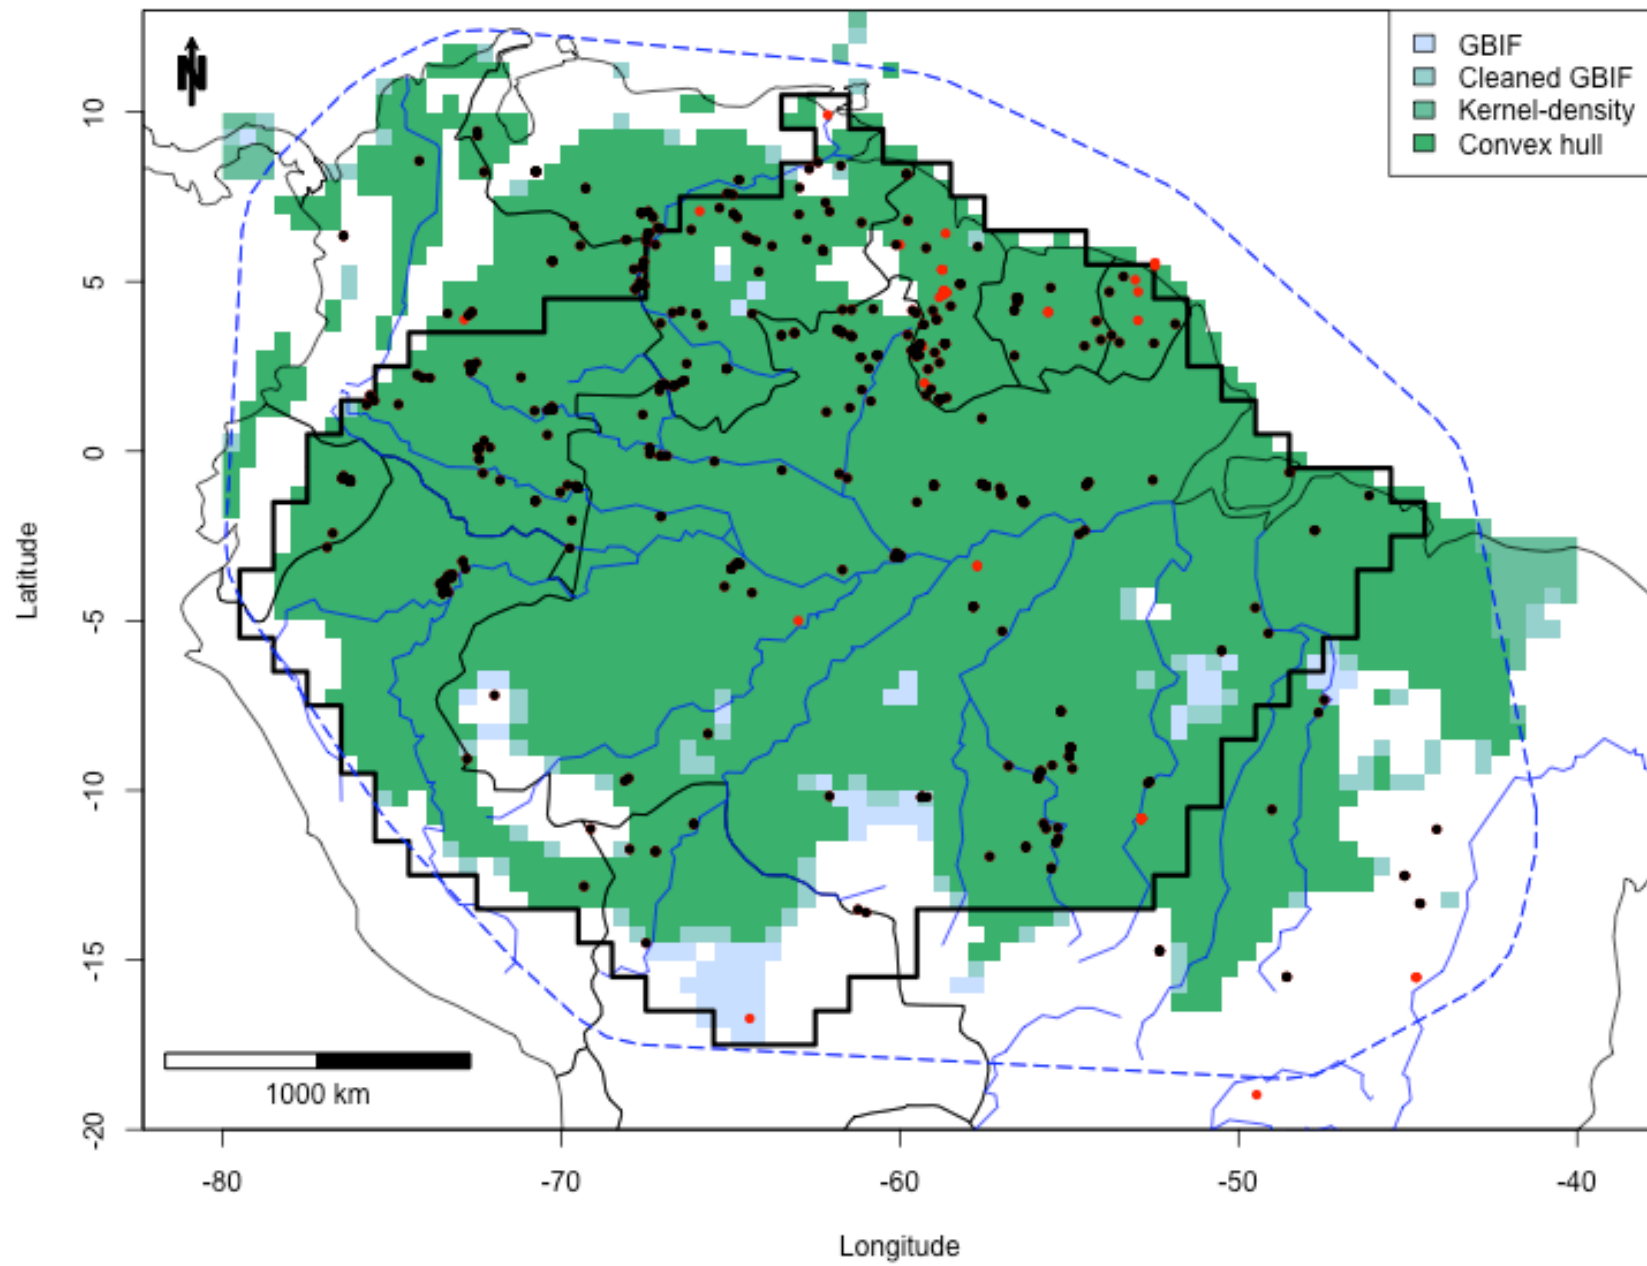

# Zygia latifolia

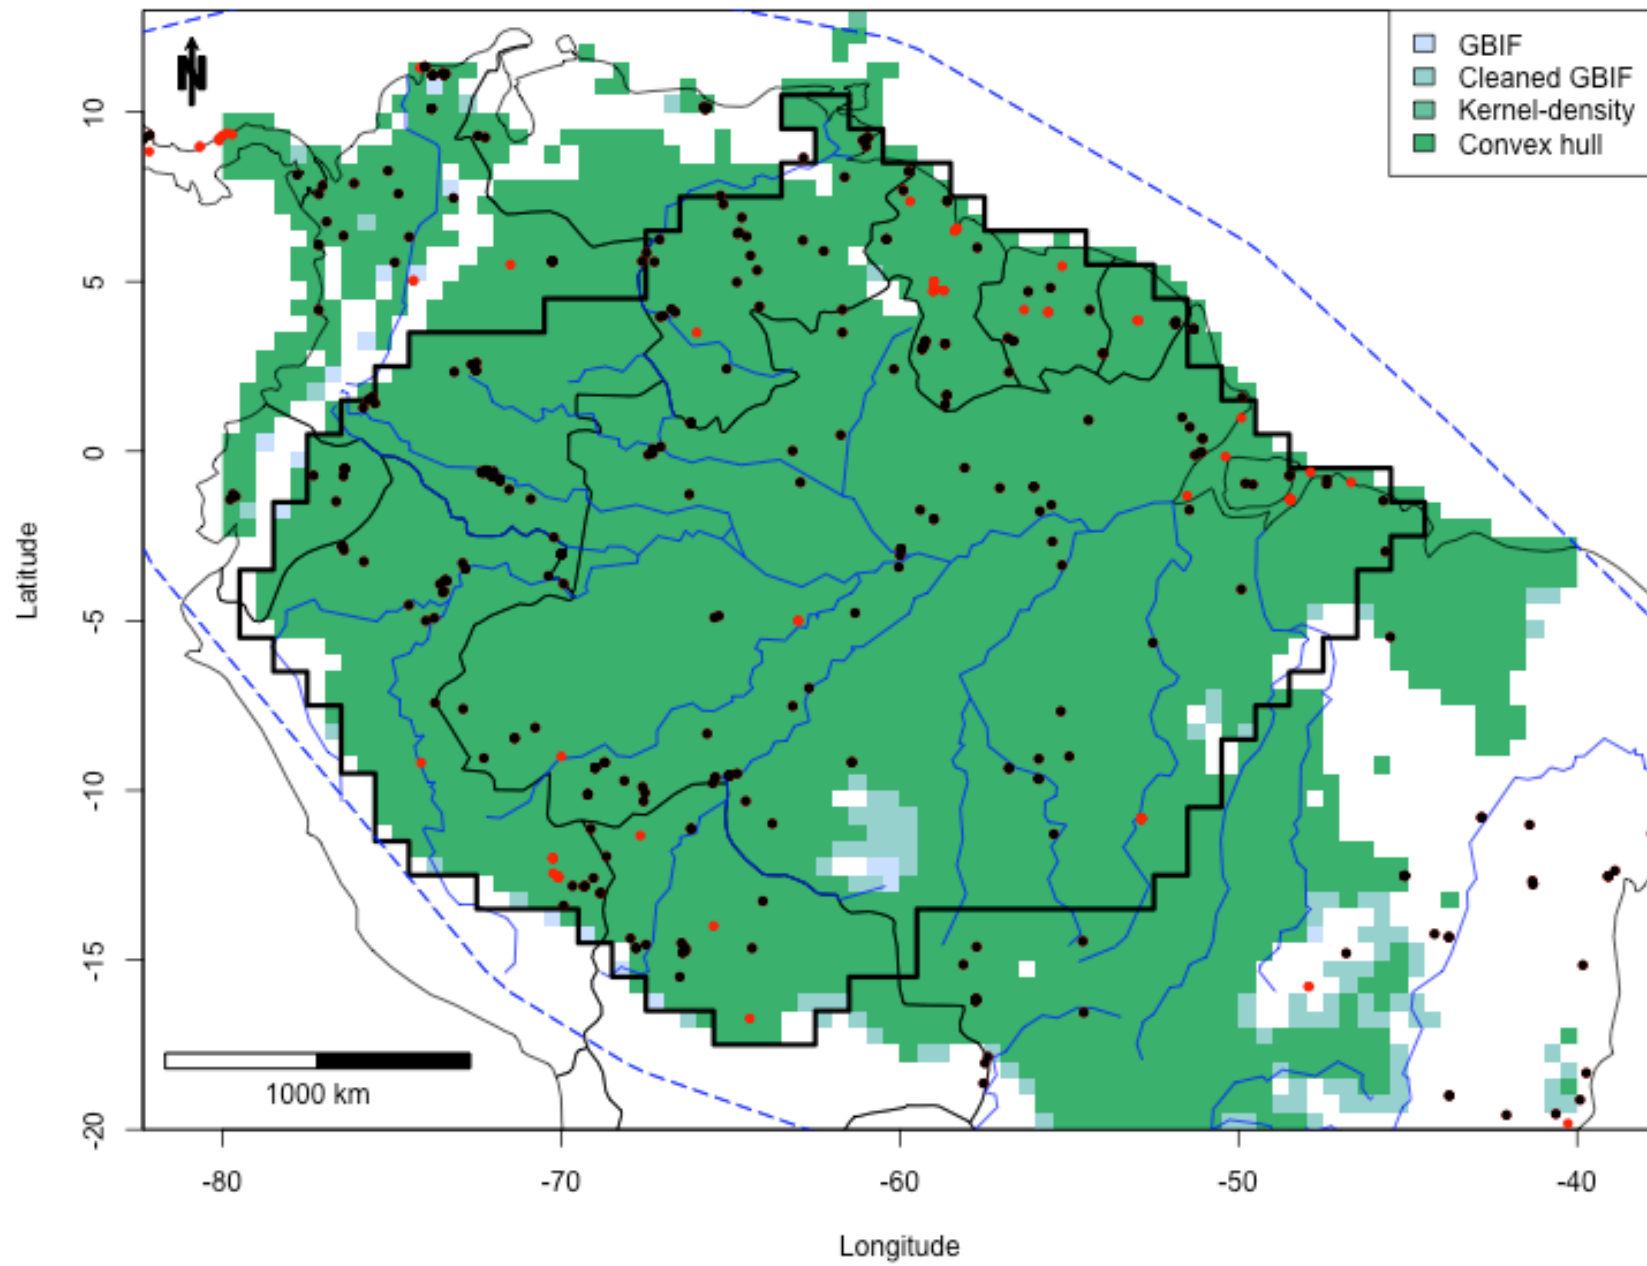



# Zygia racemosa

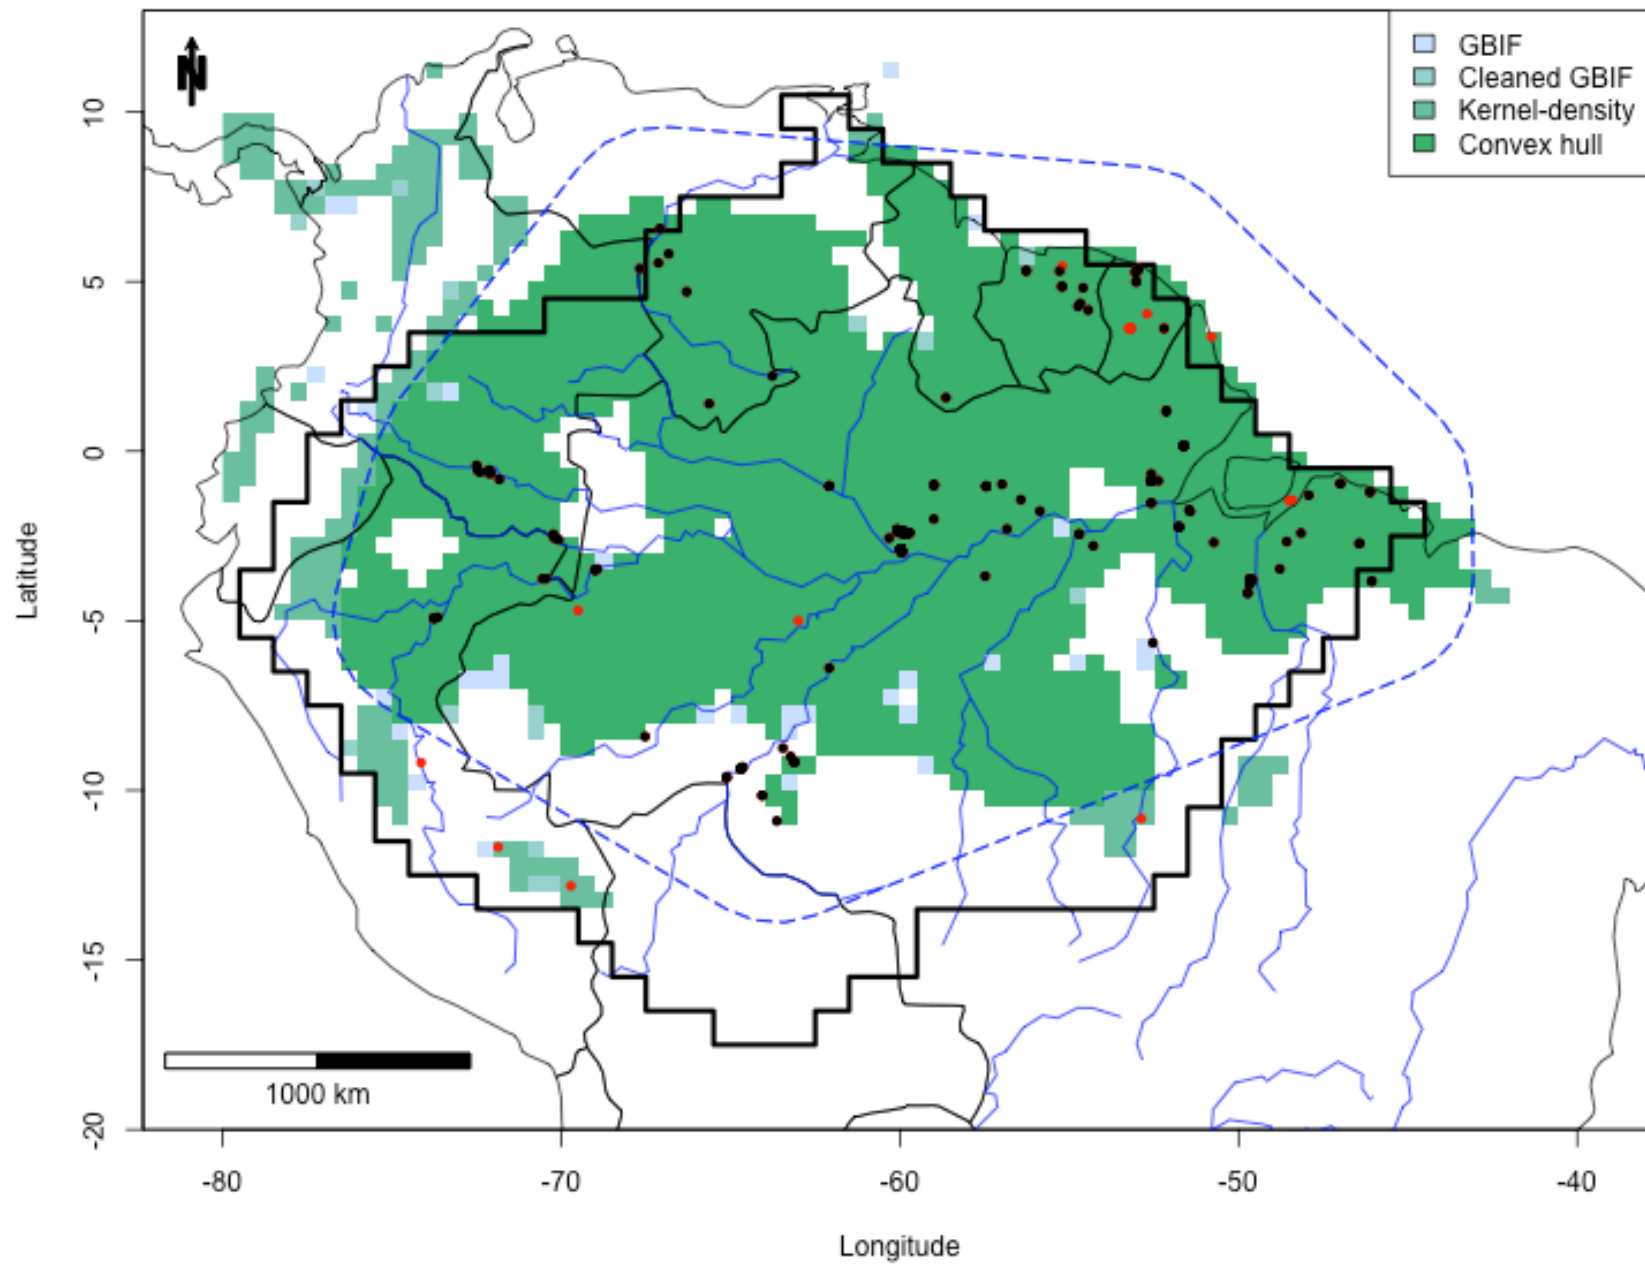

Supplement: 41598_2017_18927_MOESM5_ESM.pdf [file 41598_2017_18927_MOESM5_ESM.pdf]
