# Supplementary material for: Species Distribution Modelling: Contrasting presence-only models with plot abundance data
Source: PubMed Central journal article supplement (PMC5772443; doi:10.1038/s41598-017-18927-1), 2018-01-17
Supplement: 41598_2017_18927_MOESM2_ESM.pdf [file 41598_2017_18927_MOESM2_ESM.pdf]

## **Supplemental Material**

**for**

### **Species Distribution Modelling: Contrasting presence-only models with plot abundance data**

Vitor F. Gomes\*, Stéphanie D. IJff, Niels Raes, Iêda Leão Amaral, Rafael P. Salomão, Luiz de Souza Coelho, Francisca Dionízia de Almeida Matos, Carolina V. Castilho, Diogenes de Andrade Lima Filho, Dairon Cárdenas López, Juan Ernesto Guevara, William E. Magnusson, Oliver L. Phillips, Florian Wittmann, Marcelo de Jesus Veiga Carim, Maria Pires Martins, Mariana Victória Irume, Daniel Sabatier, Jean-François Molino, Olaf S. Bánki, José Renan da Silva Guimarães, Nigel C.A. Pitman, Maria Teresa Fernandez Piedade, Abel Monteagudo Mendoza, Bruno Garcia Luize, Eduardo Martins Venticinque, Evlyn Márcia Moraes de Leão Novo, Percy Núñez Vargas, Thiago Sanna Freire Silva, Angelo Gilberto Manzatto, John Terborgh, Neidiane Farias Costa Reis, Juan Carlos Montero, Katia Regina Casula, Beatriz S. Marimon, Ben-Hur Marimon Jr., Euridice N. Honorio Coronado, Ted R. Feldpausch, Alvaro Duque, Charles Eugene Zartman, Nicolás Castaño Arboleda, Timothy J. Killeen, Bonifacio Mostacedo, Rodolfo Vasquez, Jochen Schöngart, Rafael L. Assis, Marcelo Brilhante Medeiros, Marcelo Fragomeni Simon, Ana Andrade, William F. Laurance, José Luís Camargo, Layon O. Demarchi, Susan G.W. Laurance, Emanuelle de Sousa Farias, Henrique Eduardo Mendonça Nascimento, Juan David Cardenas Revilla, Adriano Quaresma, Flávia R.C. Costa, Ima Célia Guimarães Vieira, Bruno Barçante Ladvocat Cintra, Hernán Castellanos, Roel Brien, Pablo R. Stevenson, Yuri Feitosa, Joost F. Duivenvoorden, Gerardo A. Aymard C., Hugo F. Mogollón, Natalia Targhetta, James A. Comiskey, Alberto Vicentini, Aline Lopes, Gabriel Damasco, Nállarett Dávila, Roosevelt García-Villacorta, Carolina Levis, Juliana Schiatti, Priscila Souza, Thaise Emilio, Alfonso Alonso, David Neill, Francisco Dallmeier, Leandro Valle Ferreira, Alejandro Araujo-Murakami, Daniel Praia, Dário Dantas do Amaral, Fernanda Antunes Carvalho, Fernanda Coelho de Souza, Kenneth Feeley, Luzmila Arroyo, Marcelo Petratti Pansonato, Rogerio Gribel, Boris Villa, Juan Carlos Licona,

Paul V.A. Fine, Carlos Cerón, Chris Baraloto, Eliana M. Jimenez, Juliana Stropp, Julien Engel, Julien Engel, Marcos Silveira, Maria Cristina Peñuela Mora, Pascal Petronelli, Paul Maas, Raquel Thomas-Caesar, Terry W. Henkel, Doug Daly, Marcos Ríos Paredes, Tim R. Baker, Alfredo Fuentes, Carlos A. Peres, Jerome Chave, Jose Luis Marcelo Pena, Kyle G. Dexter, Miles R. Silman, Peter Møller Jørgensen, Toby Pennington, Anthony Di Fiore, Fernando Cornejo Valverde, Juan Fernando Phillips, Gonzalo Rivas-Torres, Patricio von Hildebrand, Tinde R. van Andel, Ademir R. Ruschel, Adriana Prieto, Agustín Rudas, Bruce Hoffman, César I.A. Vela, Edelcilio Marques Barbosa, Egleé L. Zent, George Pepe Gallardo Gonzales, Hilda Paulette Dávila Doza, Ires Paula de Andrade Miranda, Jean-Louis Guillaumet, Linder Felipe Mozombite Pinto, Luiz Carlos de Matos Bonates, Natalino Silva, Ricardo Zárate Gómez, Stanford Zent, Therany Gonzales, Vincent A. Vos, Yadvinder Malhi, Alexandre A. Oliveira, Angela Cano, Bianca Weiss Albuquerque, Corine Vriesendorp, Diego Felipe Correa, Emilio Vilanova Torre, Geertje van der Heijden, Hirma Ramirez-Angulo, José Ferreira Ramos, Kenneth R. Young, Maira Rocha, Marcelo Trindade Nascimento, Maria Natalia Umaña Medina, Milton Tirado, Ophelia Wang, Rodrigo Sierra, Armando Torres-Lezama, Casimiro Mendoza, Cid Ferreira, Cláudia Baidier, Daniel Villarroel, Henrik Balslev, Italo Mesones, Ligia Estela Urrego Giraldo, Luisa Fernanda Casas, Manuel Augusto Ahuite Reategui, Reynaldo Linares-Palomino, Roderick Zagt, Sasha Cárdenas, William Farfan-Rios, Adeilza Felipe Sampaio, Daniela Pauletto, Elvis H. Valderrama Sandoval, Freddy Ramirez Arevalo, Isau Huamantupa-Chuquimaco, Karina Garcia-Cabrera, Lionel Hernandez, Luis Valenzuela Gamarra, Miguel N. Alexiades, Susamar Pansini, Walter Palacios Cuenca, William Milliken, Joana Ricardo, Gabriela Lopez-Gonzalez, Edwin Pos, Hans ter Steege\*

\*Correspondence and requests for materials should be addressed to H.T.S. (email: [hans.tersteege@naturalis.nl](mailto:hans.tersteege@naturalis.nl))

## **Appendix S2: Comparing the results of modelling the area of occupancy with MaxEnt and with inverse distance weighting (IDW).**

Analysis results for the predicted area of occupancy as calculated by Maxent and IDW methods. The analyses were conducted for 170 of all 227 hyperdominant species that had MaxEnt's predicted environmental suitability significantly different from a null model. The following results are shown: Spearman's correlation and 90<sup>th</sup> quantile, testing the relationship between the methods at plot localities; sensitivity to test their predictive performance; AUC values for MaxEnt, AUC values for 95<sup>th</sup> ranked null model; and the thresholded predicted area (of occupancy) for both methods measured by the number of grid cells. Additionally, the number of Amazonian regions in which each species collections is distributed.

| Species                      | Spearman's Correlation | 90th Quantile | IDW Sensitivity | MaxEnt Sensitivity | MaxEnt AUC | Null Model AUC 95th Rank | Area MaxEnt | Area IDW | N of Amazonian Regions |
|------------------------------|------------------------|---------------|-----------------|--------------------|------------|--------------------------|-------------|----------|------------------------|
| Acosmium_cardenasii          | 0.428                  | 0.001         | 1.000           | 0.333              | 0.898      | 0.840                    | 200         | 203      | 2                      |
| Alexa_imperatricis           | 0.198                  | 0.003         | 1.000           | 0.733              | 0.942      | 0.824                    | 161         | 392      | 1                      |
| Amphiodon_effusus            | 0.422                  | 0.009         | 0.912           | 0.829              | 0.881      | 0.795                    | 858         | 933      | 5                      |
| Apeiba_glabra                | 0.160                  | 0.002         | 0.789           | 0.800              | 0.835      | 0.759                    | 1395        | 1518     | 6                      |
| Aspidosperma_excelsum        | 0.293                  | 0.022         | 0.910           | 0.950              | 0.799      | 0.764                    | 2000        | 1801     | 6                      |
| Astrocaryum_aculeatum        | -0.089                 | 0.000         | 0.640           | 0.904              | 0.805      | 0.784                    | 1808        | 1321     | 6                      |
| Astrocaryum_murumuru         | 0.431                  | -0.007        | 0.900           | 0.614              | 0.882      | 0.803                    | 1046        | 1244     | 5                      |
| Attalea_butyracea            | 0.269                  | -0.008        | 0.784           | 0.324              | 0.901      | 0.792                    | 513         | 761      | 2                      |
| Attalea_maripa               | -0.204                 | -0.008        | 0.851           | 0.546              | 0.867      | 0.781                    | 1195        | 1743     | 5                      |
| Attalea_phalerata            | 0.095                  | 0.014         | 0.878           | 0.649              | 0.837      | 0.795                    | 614         | 778      | 4                      |
| Attalea_speciosa             | 0.560                  | 0.046         | 0.750           | 0.447              | 0.889      | 0.851                    | 450         | 796      | 4                      |
| Bertholletia_excelsa         | 0.136                  | -0.001        | 0.854           | 0.880              | 0.801      | 0.787                    | 1634        | 1147     | 6                      |
| Bocageopsis_multiflora       | 0.387                  | 0.009         | 0.904           | 0.873              | 0.848      | 0.767                    | 1311        | 1434     | 6                      |
| Brosimum_rubescens           | 0.225                  | 0.002         | 0.941           | 0.993              | 0.792      | 0.772                    | 1959        | 1819     | 6                      |
| Brosimum_utile               | 0.406                  | 0.006         | 0.904           | 0.806              | 0.838      | 0.768                    | 1444        | 1395     | 5                      |
| Campsiandra_implexicaulis    | 0.358                  | 0.003         | 0.333           | 0.000              | 0.935      | 0.845                    | 254         | 425      | 4                      |
| Caraipa_densifolia           | 0.275                  | 0.003         | 0.631           | 0.975              | 0.773      | 0.755                    | 2007        | 1209     | 6                      |
| Carapa_guianensis            | 0.300                  | 0.014         | 0.844           | 0.944              | 0.790      | 0.768                    | 1707        | 1388     | 6                      |
| Caryocar_glabrum             | 0.368                  | 0.002         | 0.895           | 0.953              | 0.832      | 0.765                    | 1619        | 1661     | 6                      |
| Catostemma_fragrans          | 0.403                  | 0.049         | 0.895           | 0.947              | 0.969      | 0.840                    | 231         | 165      | 2                      |
| Cecropia_latiloba            | 0.268                  | 0.003         | 0.464           | 0.962              | 0.811      | 0.782                    | 1679        | 1078     | 6                      |
| Cecropia_membranacea         | 0.598                  | 0.012         | 0.750           | 0.867              | 0.884      | 0.773                    | 762         | 982      | 5                      |
| Cecropia_sciadophylla        | 0.049                  | -0.002        | 0.899           | 0.786              | 0.814      | 0.775                    | 1574        | 1756     | 6                      |
| Cedrelinga_cateniformis      | 0.387                  | -0.001        | 0.864           | 0.732              | 0.869      | 0.782                    | 1095        | 1433     | 6                      |
| Celtis_schippii              | 0.417                  | 0.014         | 0.943           | 0.841              | 0.836      | 0.779                    | 754         | 806      | 4                      |
| Cenostigma_tocantinum        | 0.338                  | 0.017         | 0.909           | 1.000              | 0.926      | 0.836                    | 293         | 204      | 2                      |
| Chlorocardium_rodiei         | 0.159                  | 0.000         | 1.000           | 1.000              | 0.930      | 0.875                    | 49          | 89       | 1                      |
| Chrysophyllum_sanguinolentum | 0.600                  | 0.015         | 0.942           | 0.849              | 0.878      | 0.778                    | 1000        | 1308     | 5                      |
| Clarisia_racemosa            | -0.071                 | -0.014        | 0.867           | 0.849              | 0.765      | 0.761                    | 1649        | 1756     | 6                      |
| Clathrotropis_glaucophylla   | 0.401                  | 0.001         | 0.774           | 0.714              | 0.946      | 0.810                    | 377         | 290      | 3                      |
| Clathrotropis_macrocarpa     | 0.470                  | 0.028         | 0.930           | 0.771              | 0.924      | 0.788                    | 568         | 668      | 4                      |
| Conceveiba_guianensis        | 0.312                  | 0.007         | 0.903           | 0.903              | 0.811      | 0.756                    | 1694        | 1806     | 6                      |
| Couepia_guianensis           | 0.494                  | 0.006         | 0.928           | 0.940              | 0.849      | 0.785                    | 1410        | 1362     | 6                      |
| Couepia_paraensis            | 0.400                  | 0.003         | 0.653           | 0.917              | 0.835      | 0.785                    | 1544        | 849      | 6                      |
| Cynometra_marginata          | 0.134                  | 0.001         | 0.406           | 0.867              | 0.872      | 0.809                    | 1329        | 738      | 5                      |
| Diploptropis_purpurea        | -0.062                 | -0.003        | 0.784           | 0.884              | 0.804      | 0.788                    | 1723        | 1642     | 6                      |
| Drypetes_amazonica           | 0.564                  | 0.013         | 0.944           | 0.827              | 0.852      | 0.787                    | 843         | 1196     | 4                      |
| Ecclinusa_guianensis         | 0.164                  | 0.012         | 0.841           | 0.909              | 0.800      | 0.793                    | 1718        | 1558     | 5                      |
| Enterolobium_schomburgkii    | 0.125                  | -0.005        | 0.843           | 0.957              | 0.770      | 0.767                    | 1927        | 1652     | 6                      |
| Eperua_falcata               | 0.393                  | 0.118         | 0.903           | 0.882              | 0.963      | 0.810                    | 218         | 297      | 3                      |

| Species                   | Spearman's Correlation | 90th Quantile | IDW Sensitivity | MaxEnt Sensitivity | MaxEnt AUC | Null Model AUC 95th Rank | Area MaxEnt | Area IDW | N of Amazonian Regions |
|---------------------------|------------------------|---------------|-----------------|--------------------|------------|--------------------------|-------------|----------|------------------------|
| Eperua_grandiflora        | 0.320                  | 0.011         | 0.692           | 1.000              | 0.901      | 0.824                    | 229         | 203      | 3                      |
| Eperua_leucantha          | 0.391                  | 0.017         | 0.957           | 0.889              | 0.979      | 0.830                    | 154         | 270      | 3                      |
| Eperua_purpurea           | 0.326                  | 0.029         | 1.000           | 0.818              | 0.983      | 0.817                    | 125         | 215      | 3                      |
| Erisma_uncinatum          | 0.000                  | -0.006        | 0.880           | 0.857              | 0.784      | 0.780                    | 2009        | 1564     | 6                      |
| Eschweilera_albiflora     | 0.577                  | 0.030         | 0.814           | 0.952              | 0.862      | 0.785                    | 1426        | 1209     | 6                      |
| Eschweilera_amazonica     | 0.667                  | 0.035         | 0.778           | 0.857              | 0.892      | 0.809                    | 811         | 674      | 5                      |
| Eschweilera_atropetiolata | 0.451                  | 0.018         | 0.923           | 0.469              | 0.932      | 0.836                    | 230         | 892      | 3                      |
| Eschweilera_bracteosa     | 0.435                  | 0.012         | 0.925           | 0.633              | 0.936      | 0.791                    | 508         | 1115     | 5                      |
| Eschweilera_coriacea      | 0.287                  | 0.093         | 0.902           | 0.929              | 0.790      | 0.749                    | 1784        | 1813     | 6                      |
| Eschweilera_decolorans    | 0.282                  | 0.005         | 0.846           | 0.829              | 0.850      | 0.804                    | 1175        | 1040     | 5                      |
| Eschweilera_grandiflora   | 0.541                  | 0.009         | 0.943           | 0.875              | 0.876      | 0.800                    | 1194        | 1215     | 6                      |
| Eschweilera_parviflora    | 0.419                  | 0.009         | 0.739           | 0.947              | 0.853      | 0.780                    | 1408        | 977      | 6                      |
| Eschweilera_parvifolia    | 0.504                  | 0.016         | 0.735           | 0.872              | 0.856      | 0.774                    | 1432        | 976      | 5                      |
| Eschweilera_pedicellata   | 0.682                  | 0.008         | 0.774           | 0.984              | 0.858      | 0.766                    | 1258        | 1040     | 6                      |
| Eschweilera_sagotiana     | 0.525                  | 0.028         | 0.688           | 0.944              | 0.904      | 0.809                    | 695         | 296      | 3                      |
| Eschweilera_tessmannii    | 0.555                  | 0.016         | 0.970           | 0.821              | 0.926      | 0.781                    | 707         | 1108     | 5                      |
| Eschweilera_truncata      | 0.435                  | 0.032         | 0.885           | 0.824              | 0.902      | 0.807                    | 605         | 456      | 5                      |
| Eschweilera_wachenheimii  | 0.697                  | 0.028         | 0.931           | 0.839              | 0.907      | 0.817                    | 584         | 729      | 4                      |
| Euterpe_oleracea          | 0.018                  | -0.007        | 0.731           | 0.787              | 0.843      | 0.780                    | 1392        | 927      | 5                      |
| Euterpe_precatoria        | 0.241                  | -0.063        | 0.953           | 0.612              | 0.841      | 0.752                    | 903         | 1774     | 5                      |
| Garcinia_macrophylla      | 0.188                  | -0.002        | 0.842           | 0.931              | 0.776      | 0.772                    | 1876        | 1785     | 6                      |
| Goupia_glabra             | 0.306                  | 0.008         | 0.952           | 0.869              | 0.830      | 0.762                    | 1495        | 1601     | 6                      |
| Guarea_macrophylla        | 0.417                  | 0.030         | 0.877           | 0.849              | 0.735      | 0.727                    | 1259        | 1337     | 6                      |
| Guarea_silvatica          | 0.345                  | 0.001         | 0.865           | 0.904              | 0.844      | 0.783                    | 1470        | 1114     | 6                      |
| Gustavia_augusta          | 0.192                  | -0.001        | 0.819           | 0.935              | 0.755      | 0.750                    | 1966        | 1496     | 6                      |
| Gustavia_hexapetala       | 0.346                  | 0.014         | 0.746           | 0.977              | 0.789      | 0.753                    | 1710        | 1259     | 6                      |
| Handroanthus_barbatus     | 0.384                  | 0.007         | 0.838           | 0.739              | 0.916      | 0.793                    | 613         | 772      | 5                      |
| Haploclathra_cordata      | 0.508                  | 0.010         | 1.000           | 0.800              | 0.950      | 0.909                    | 191         | 259      | 2                      |
| Hevea_guianensis          | 0.493                  | 0.016         | 0.911           | 0.936              | 0.847      | 0.758                    | 1303        | 1526     | 6                      |
| Inga_lateriflora          | 0.035                  | 0.001         | 0.683           | 0.889              | 0.810      | 0.793                    | 1751        | 1218     | 6                      |
| Inga_marginata            | 0.268                  | 0.003         | 0.333           | 0.419              | 0.895      | 0.783                    | 537         | 1507     | 1                      |
| Iriartea_deltoidea        | 0.338                  | 0.112         | 0.957           | 0.762              | 0.865      | 0.769                    | 629         | 1200     | 4                      |
| Iryanthera_juruensis      | 0.243                  | -0.036        | 0.931           | 0.939              | 0.781      | 0.743                    | 1764        | 1895     | 6                      |
| Iryanthera_laevis         | 0.273                  | 0.006         | 0.944           | 0.865              | 0.833      | 0.772                    | 1336        | 1600     | 5                      |
| Iryanthera_ulei           | 0.337                  | 0.008         | 0.786           | 0.950              | 0.849      | 0.762                    | 1173        | 969      | 5                      |
| Jacaranda_copaia          | -0.198                 | -0.004        | 0.929           | 0.902              | 0.762      | 0.742                    | 1995        | 1961     | 6                      |
| Laetia_corymbulosa        | 0.232                  | 0.005         | 0.640           | 0.846              | 0.881      | 0.802                    | 1076        | 580      | 5                      |
| Laetia_procera            | 0.078                  | 0.005         | 0.879           | 0.939              | 0.802      | 0.772                    | 1913        | 1717     | 6                      |
| Lecythis_corrugata        | 0.642                  | 0.016         | 0.789           | 0.907              | 0.881      | 0.775                    | 790         | 774      | 5                      |
| Lecythis_idatimon         | 0.495                  | 0.027         | 0.865           | 0.846              | 0.924      | 0.790                    | 353         | 514      | 3                      |

| Species                   | Spearman's Correlation | 90th Quantile | IDW Sensitivity | MaxEnt Sensitivity | MaxEnt AUC | Null Model AUC 95th Rank | Area MaxEnt | Area IDW | N of Amazonian Regions |
|---------------------------|------------------------|---------------|-----------------|--------------------|------------|--------------------------|-------------|----------|------------------------|
| Leonia_crassa             | 0.562                  | 0.004         | 0.767           | 0.871              | 0.890      | 0.780                    | 816         | 695      | 5                      |
| Leonia_glycyarpa          | 0.237                  | 0.008         | 0.893           | 0.944              | 0.779      | 0.753                    | 1797        | 1723     | 6                      |
| Licania_alba              | 0.329                  | 0.013         | 0.762           | 0.840              | 0.890      | 0.836                    | 361         | 322      | 2                      |
| Licania_apetala           | 0.292                  | 0.020         | 0.833           | 0.981              | 0.753      | 0.744                    | 2094        | 1794     | 6                      |
| Licania_densiflora        | 0.421                  | 0.003         | 0.893           | 0.542              | 0.918      | 0.809                    | 323         | 467      | 2                      |
| Licania_heteromorpha      | 0.518                  | 0.020         | 0.900           | 0.937              | 0.807      | 0.740                    | 1725        | 1785     | 6                      |
| Licania_micrantha         | 0.352                  | 0.002         | 0.907           | 0.970              | 0.806      | 0.772                    | 1763        | 1568     | 6                      |
| Licania_oblongifolia      | 0.411                  | 0.006         | 0.917           | 0.861              | 0.853      | 0.841                    | 1112        | 942      | 5                      |
| Luehea_cymulosa           | 0.525                  | 0.007         | 0.778           | 0.931              | 0.847      | 0.787                    | 1454        | 824      | 6                      |
| Mabea_nitida              | 0.531                  | 0.007         | 0.764           | 0.939              | 0.846      | 0.762                    | 1227        | 949      | 5                      |
| Mabea_speciosa            | 0.186                  | 0.009         | 0.767           | 0.694              | 0.867      | 0.772                    | 1133        | 1318     | 6                      |
| Macrobium_acaciifolium    | 0.170                  | -0.002        | 0.685           | 0.906              | 0.787      | 0.746                    | 1903        | 1201     | 6                      |
| Macrobium_angustifolium   | 0.325                  | 0.006         | 0.806           | 0.952              | 0.847      | 0.768                    | 1533        | 1372     | 6                      |
| Manilkara_bidentata       | 0.219                  | 0.010         | 0.913           | 0.871              | 0.781      | 0.760                    | 1725        | 1659     | 6                      |
| Maquira_coriacea          | 0.073                  | 0.012         | 0.818           | 0.897              | 0.798      | 0.783                    | 1831        | 1262     | 6                      |
| Matisia_ochrocalyx        | 0.041                  | -0.011        | 0.852           | 0.845              | 0.828      | 0.761                    | 1437        | 1514     | 6                      |
| Mauritia_flexuosa         | 0.493                  | 0.038         | 0.817           | 0.706              | 0.832      | 0.771                    | 1363        | 1366     | 5                      |
| Mauritiella_aculeata      | 0.521                  | 0.003         | 0.512           | 1.000              | 0.880      | 0.793                    | 1164        | 611      | 5                      |
| Metrodorea_flavida        | 0.584                  | 0.016         | 0.934           | 0.828              | 0.845      | 0.774                    | 798         | 959      | 5                      |
| Mezilaurus_itauba         | 0.077                  | 0.001         | 0.855           | 0.929              | 0.799      | 0.795                    | 1837        | 1541     | 6                      |
| Micrandra_elata           | 0.523                  | 0.006         | 0.680           | 1.000              | 0.821      | 0.802                    | 1355        | 585      | 6                      |
| Micrandra_glabra          | -0.087                 | 0.000         | 1.000           | 0.333              | 0.930      | 0.911                    | 31          | 161      | 1                      |
| Micrandra_spruceana       | 0.624                  | 0.017         | 0.966           | 0.833              | 0.920      | 0.787                    | 676         | 840      | 5                      |
| Micrandra_sprucei         | 0.296                  | 0.077         | 0.850           | 1.000              | 0.981      | 0.824                    | 110         | 176      | 3                      |
| Micropholis_gardneriana   | 0.106                  | 0.000         | 0.250           | 0.000              | 0.869      | 0.783                    | 270         | 150      | 5                      |
| Micropholis_guyanensis    | 0.231                  | 0.008         | 0.907           | 0.968              | 0.761      | 0.748                    | 1956        | 1902     | 6                      |
| Minquartia_guianensis     | 0.198                  | -0.015        | 0.917           | 0.863              | 0.830      | 0.757                    | 1571        | 1794     | 6                      |
| Mollia_gracilis           | 0.539                  | 0.001         | 0.656           | 0.750              | 0.915      | 0.802                    | 646         | 461      | 3                      |
| Monopteryx_uaucu          | 0.353                  | 0.014         | 1.000           | 0.812              | 0.966      | 0.828                    | 204         | 334      | 3                      |
| Mora_excelsa              | 0.359                  | 0.003         | 0.909           | 0.857              | 0.975      | 0.882                    | 102         | 118      | 1                      |
| Ocotea_aciphylla          | 0.406                  | 0.010         | 0.808           | 0.974              | 0.761      | 0.746                    | 1759        | 1549     | 5                      |
| Ocotea_cernua             | 0.144                  | -0.004        | 0.769           | 0.947              | 0.741      | 0.739                    | 1906        | 1661     | 6                      |
| Oenocarpus_bacaba         | 0.070                  | 0.034         | 1.000           | 0.273              | 0.918      | 0.809                    | 571         | 1527     | 3                      |
| Oenocarpus_bataua         | 0.392                  | 0.006         | 0.945           | 0.636              | 0.842      | 0.762                    | 986         | 1753     | 5                      |
| Osteophloeum_platyspermum | 0.398                  | 0.003         | 0.912           | 0.925              | 0.861      | 0.768                    | 1439        | 1417     | 6                      |
| Otoba_parvifolia          | 0.482                  | 0.014         | 0.931           | 0.717              | 0.890      | 0.775                    | 623         | 751      | 4                      |
| Oxandra_polyantha         | 0.433                  | 0.008         | 0.885           | 0.765              | 0.901      | 0.809                    | 713         | 605      | 5                      |
| Pachira_brevipes          | 0.564                  | 0.057         | 1.000           | 0.833              | 0.966      | 0.824                    | 251         | 333      | 2                      |
| Pentaclethra_macroloba    | 0.146                  | 0.010         | 0.810           | 0.833              | 0.850      | 0.774                    | 972         | 520      | 5                      |
| Poulsenia_armata          | 0.324                  | 0.002         | 0.850           | 0.667              | 0.859      | 0.785                    | 550         | 540      | 3                      |

| Species                     | Spearman's Correlation | 90th Quantile | IDW Sensitivity | MaxEnt Sensitivity | MaxEnt AUC | Null Model AUC 95th Rank | Area MaxEnt | Area IDW | N of Amazonian Regions |
|-----------------------------|------------------------|---------------|-----------------|--------------------|------------|--------------------------|-------------|----------|------------------------|
| Pourouma_bicolor            | 0.328                  | 0.013         | 0.880           | 0.667              | 0.859      | 0.747                    | 881         | 1533     | 5                      |
| Pourouma_cecropiifolia      | 0.351                  | 0.009         | 0.865           | 0.786              | 0.837      | 0.772                    | 965         | 1278     | 5                      |
| Pourouma_minor              | 0.242                  | -0.006        | 0.878           | 0.911              | 0.803      | 0.757                    | 1656        | 1708     | 6                      |
| Pouteria_cuspidata          | 0.423                  | 0.004         | 0.914           | 0.941              | 0.787      | 0.754                    | 2009        | 1729     | 6                      |
| Pouteria_elegans            | 0.330                  | 0.014         | 0.798           | 0.887              | 0.874      | 0.785                    | 1463        | 1059     | 6                      |
| Protium_apiculatum          | 0.253                  | 0.016         | 0.868           | 0.935              | 0.837      | 0.788                    | 1489        | 1476     | 6                      |
| Protium_aracouchini         | 0.114                  | 0.002         | 0.846           | 0.960              | 0.756      | 0.743                    | 1972        | 1526     | 6                      |
| Protium_decandrum           | 0.516                  | 0.007         | 0.947           | 0.936              | 0.855      | 0.788                    | 1323        | 1378     | 6                      |
| Protium_hebetatum           | 0.534                  | 0.043         | 0.897           | 0.840              | 0.906      | 0.778                    | 826         | 1098     | 5                      |
| Protium_sagotianum          | 0.002                  | 0.012         | 0.899           | 0.956              | 0.759      | 0.755                    | 1987        | 1804     | 6                      |
| Protium_tenuifolium         | 0.316                  | 0.009         | 0.784           | 0.929              | 0.772      | 0.772                    | 1802        | 1437     | 6                      |
| Protium_trifoliolatum       | 0.447                  | 0.005         | 0.809           | 0.928              | 0.844      | 0.766                    | 1515        | 1354     | 6                      |
| Pseudobombax_munguba        | 0.294                  | 0.007         | 0.794           | 0.848              | 0.856      | 0.809                    | 1197        | 989      | 6                      |
| Pseudolmedia_laevigata      | 0.259                  | -0.001        | 0.918           | 0.900              | 0.791      | 0.752                    | 1717        | 1738     | 5                      |
| Pseudolmedia_laevis         | 0.275                  | -0.067        | 0.918           | 0.825              | 0.781      | 0.751                    | 1565        | 1820     | 5                      |
| Pseudopiptadenia_suaveolens | 0.167                  | -0.003        | 0.853           | 0.916              | 0.821      | 0.800                    | 1646        | 1548     | 6                      |
| Pterocarpus_amazonum        | 0.455                  | 0.014         | 0.744           | 0.958              | 0.824      | 0.784                    | 1701        | 1015     | 6                      |
| Pterocarpus_santalinooides  | 0.312                  | 0.004         | 0.726           | 0.975              | 0.765      | 0.761                    | 2099        | 1313     | 6                      |
| Qualea_paraensis            | 0.241                  | -0.003        | 0.936           | 0.933              | 0.817      | 0.782                    | 1929        | 1615     | 6                      |
| Quararibea_guianensis       | 0.045                  | 0.000         | 0.812           | 0.938              | 0.805      | 0.773                    | 1641        | 990      | 6                      |
| Quararibea_wittii           | 0.544                  | 0.014         | 0.895           | 0.885              | 0.856      | 0.782                    | 526         | 520      | 3                      |
| Rinorea_racemosa            | 0.345                  | -0.010        | 0.928           | 0.820              | 0.908      | 0.788                    | 848         | 1114     | 5                      |
| Rinoreocarpus_ulei          | 0.254                  | 0.011         | 0.717           | 0.976              | 0.812      | 0.777                    | 1486        | 834      | 6                      |
| Sacoglottis_guianensis      | 0.401                  | 0.011         | 0.776           | 0.989              | 0.781      | 0.773                    | 1947        | 1562     | 6                      |
| Sagotia_brachysepala        | 0.374                  | 0.002         | 0.323           | 1.000              | 0.835      | 0.787                    | 1538        | 632      | 6                      |
| Sagotia_racemosa            | 0.274                  | 0.006         | 0.743           | 0.921              | 0.839      | 0.771                    | 1514        | 1111     | 6                      |
| Scleronema_micranthum       | 0.561                  | 0.021         | 1.000           | 0.857              | 0.933      | 0.795                    | 506         | 778      | 4                      |
| Senefeldera_inclinata       | 0.439                  | 0.001         | 0.535           | 0.833              | 0.927      | 0.792                    | 635         | 316      | 4                      |
| Siparuna_decipiens          | 0.301                  | -0.002        | 0.874           | 0.957              | 0.807      | 0.757                    | 1586        | 1470     | 5                      |
| Socratea_exorrhiza          | 0.135                  | -0.004        | 0.951           | 0.528              | 0.832      | 0.756                    | 980         | 1929     | 5                      |
| Sterculia_pruriens          | 0.332                  | 0.007         | 0.849           | 0.953              | 0.820      | 0.779                    | 1746        | 1560     | 6                      |
| Swartzia_polyphylla         | 0.552                  | 0.007         | 0.868           | 0.959              | 0.875      | 0.769                    | 1383        | 1243     | 6                      |
| Symphonia_globulifera       | 0.220                  | 0.004         | 0.882           | 0.929              | 0.757      | 0.738                    | 1861        | 1798     | 6                      |
| Tachigali_paniculata        | 0.255                  | -0.001        | 0.816           | 0.878              | 0.788      | 0.766                    | 1857        | 1708     | 6                      |
| Tetragastris_panamensis     | -0.018                 | -0.022        | 0.899           | 0.941              | 0.770      | 0.748                    | 1917        | 1664     | 6                      |
| Theobroma_cacao             | 0.120                  | 0.000         | 0.765           | 0.896              | 0.766      | 0.743                    | 1725        | 1362     | 6                      |
| Theobroma_speciosum         | 0.142                  | 0.001         | 0.908           | 0.886              | 0.784      | 0.780                    | 1500        | 1365     | 6                      |
| Theobroma_subincanum        | 0.334                  | -0.002        | 0.916           | 0.878              | 0.840      | 0.756                    | 1592        | 1671     | 6                      |
| Trattinnickia_burserifolia  | 0.484                  | 0.007         | 0.649           | 0.940              | 0.796      | 0.774                    | 1861        | 1346     | 6                      |
| Triplaris_weigeltiana       | 0.349                  | 0.014         | 0.709           | 0.882              | 0.852      | 0.780                    | 1221        | 1143     | 6                      |

| <b>Species</b>       | <b>Spearman's Correlation</b> | <b>90th Quantile</b> | <b>IDW Sensitivity</b> | <b>MaxEnt Sensitivity</b> | <b>MaxEnt AUC</b> | <b>Null Model AUC 95th Rank</b> | <b>Area MaxEnt</b> | <b>Area IDW</b> | <b>N of Amazonian Regions</b> |
|----------------------|-------------------------------|----------------------|------------------------|---------------------------|-------------------|---------------------------------|--------------------|-----------------|-------------------------------|
| Vatairea_guianensis  | 0.519                         | 0.007                | 0.881                  | 0.838                     | 0.886             | 0.783                           | 1082               | 1270            | 6                             |
| Virola_calophylla    | 0.392                         | 0.016                | 0.940                  | 0.897                     | 0.807             | 0.751                           | 1640               | 1599            | 6                             |
| Virola_elongata      | 0.489                         | 0.014                | 0.933                  | 0.954                     | 0.808             | 0.739                           | 1730               | 1706            | 5                             |
| Virola_michelii      | 0.611                         | 0.015                | 0.887                  | 0.736                     | 0.907             | 0.795                           | 661                | 1251            | 4                             |
| Virola_pavonis       | 0.566                         | 0.021                | 0.932                  | 0.871                     | 0.873             | 0.769                           | 1031               | 1291            | 5                             |
| Virola_surinamensis  | -0.005                        | 0.005                | 0.905                  | 0.908                     | 0.822             | 0.784                           | 1812               | 1689            | 6                             |
| Vouacapoua_americana | 0.286                         | 0.019                | 0.833                  | 0.880                     | 0.925             | 0.840                           | 707                | 314             | 4                             |
| Xylopia_amazonica    | 0.371                         | 0.004                | 0.558                  | 0.933                     | 0.838             | 0.793                           | 1703               | 1034            | 6                             |
| Zygia_cataractae     | -0.106                        | 0.006                | 0.675                  | 0.938                     | 0.782             | 0.750                           | 1933               | 1180            | 6                             |
| Zygia_racemosa       | 0.521                         | 0.012                | 0.828                  | 0.892                     | 0.859             | 0.783                           | 1353               | 1217            | 6                             |
