# Supplementary material for: Species Distribution Modelling: Contrasting presence-only models with plot abundance data
Source: PubMed Central journal article supplement (PMC5772443; doi:10.1038/s41598-017-18927-1), 2018-01-17
Supplement: 41598_2017_18927_MOESM4_ESM.pdf [file 41598_2017_18927_MOESM4_ESM.pdf]

## **Supplemental Material**

**for**

### **Species Distribution Modelling: Contrasting presence-only models with plot abundance data**

Vitor F. Gomes\*, Stéphanie D. IJff, Niels Raes, Iêda Leão Amaral, Rafael P. Salomão, Luiz de Souza Coelho, Francisca Dionízia de Almeida Matos, Carolina V. Castilho, Diogenes de Andrade Lima Filho, Dairon Cárdenas López, Juan Ernesto Guevara, William E. Magnusson, Oliver L. Phillips, Florian Wittmann, Marcelo de Jesus Veiga Carim, Maria Pires Martins, Mariana Victória Irume, Daniel Sabatier, Jean-François Molino, Olaf S. Bánki, José Renan da Silva Guimarães, Nigel C.A. Pitman, Maria Teresa Fernandez Piedade, Abel Monteagudo Mendoza, Bruno Garcia Luize, Eduardo Martins Venticinque, Evlyn Márcia Moraes de Leão Novo, Percy Núñez Vargas, Thiago Sanna Freire Silva, Angelo Gilberto Manzatto, John Terborgh, Neidiane Farias Costa Reis, Juan Carlos Montero, Katia Regina Casula, Beatriz S. Marimon, Ben-Hur Marimon Jr., Euridice N. Honorio Coronado, Ted R. Feldpausch, Alvaro Duque, Charles Eugene Zartman, Nicolás Castaño Arboleda, Timothy J. Killeen, Bonifacio Mostacedo, Rodolfo Vasquez, Jochen Schöngart, Rafael L. Assis, Marcelo Brilhante Medeiros, Marcelo Fragomeni Simon, Ana Andrade, William F. Laurance, José Luís Camargo, Layon O. Demarchi, Susan G.W. Laurance, Emanuelle de Sousa Farias, Henrique Eduardo Mendonça Nascimento, Juan David Cardenas Revilla, Adriano Quaresma, Flávia R.C. Costa, Ima Célia Guimarães Vieira, Bruno Barçante Ladvocat Cintra, Hernán Castellanos, Roel Brien, Pablo R. Stevenson, Yuri Feitosa, Joost F. Duivenvoorden, Gerardo A. Aymard C., Hugo F. Mogollón, Natalia Targhetta, James A. Comiskey, Alberto Vicentini, Aline Lopes, Gabriel Damasco, Nállarett Dávila, Roosevelt García-Villacorta, Carolina Levis, Juliana Schiatti, Priscila Souza, Thaise Emilio, Alfonso Alonso, David Neill, Francisco Dallmeier, Leandro Valle Ferreira, Alejandro Araujo-Murakami, Daniel Praia, Dário Dantas do Amaral, Fernanda Antunes Carvalho, Fernanda Coelho de Souza, Kenneth Feeley, Luzmila Arroyo, Marcelo Petratti Pansonato, Rogerio Gribel, Boris Villa, Juan Carlos Licona,

Paul V.A. Fine, Carlos Cerón, Chris Baraloto, Eliana M. Jimenez, Juliana Stropp, Julien Engel, Julien Engel, Marcos Silveira, Maria Cristina Peñuela Mora, Pascal Petronelli, Paul Maas, Raquel Thomas-Caesar, Terry W. Henkel, Doug Daly, Marcos Ríos Paredes, Tim R. Baker, Alfredo Fuentes, Carlos A. Peres, Jerome Chave, Jose Luis Marcelo Pena, Kyle G. Dexter, Miles R. Silman, Peter Møller Jørgensen, Toby Pennington, Anthony Di Fiore, Fernando Cornejo Valverde, Juan Fernando Phillips, Gonzalo Rivas-Torres, Patricio von Hildebrand, Tinde R. van Andel, Ademir R. Ruschel, Adriana Prieto, Agustín Rudas, Bruce Hoffman, César I.A. Vela, Edelcilio Marques Barbosa, Egleé L. Zent, George Pepe Gallardo Gonzales, Hilda Paulette Dávila Doza, Ires Paula de Andrade Miranda, Jean-Louis Guillaumet, Linder Felipe Mozombite Pinto, Luiz Carlos de Matos Bonates, Natalino Silva, Ricardo Zárate Gómez, Stanford Zent, Therany Gonzales, Vincent A. Vos, Yadvinder Malhi, Alexandre A. Oliveira, Angela Cano, Bianca Weiss Albuquerque, Corine Vriesendorp, Diego Felipe Correa, Emilio Vilanova Torre, Geertje van der Heijden, Hirma Ramirez-Angulo, José Ferreira Ramos, Kenneth R. Young, Maira Rocha, Marcelo Trindade Nascimento, Maria Natalia Umaña Medina, Milton Tirado, Ophelia Wang, Rodrigo Sierra, Armando Torres-Lezama, Casimiro Mendoza, Cid Ferreira, Cláudia Baidier, Daniel Villarroel, Henrik Balslev, Italo Mesones, Ligia Estela Urrego Giraldo, Luisa Fernanda Casas, Manuel Augusto Ahuite Reategui, Reynaldo Linares-Palomino, Roderick Zagt, Sasha Cárdenas, William Farfan-Rios, Adeilza Felipe Sampaio, Daniela Pauletto, Elvis H. Valderrama Sandoval, Freddy Ramirez Arevalo, Isau Huamantupa-Chuquimaco, Karina Garcia-Cabrera, Lionel Hernandez, Luis Valenzuela Gamarra, Miguel N. Alexiades, Susamar Pansini, Walter Palacios Cuenca, William Milliken, Joana Ricardo, Gabriela Lopez-Gonzalez, Edwin Pos, Hans ter Steege\*

\*Correspondence and requests for materials should be addressed to H.T.S. (email: [hans.tersteege@naturalis.nl](mailto:hans.tersteege@naturalis.nl))

#### **Appendix S4: Cleaning pipeline results for all 227 hyperdominant species.**

Cleaning pipeline results and percentages for all 227 hyperdominant species. The cleaning pipeline removed GBIF data inconsistencies. First, the total number of records download from GBIF is presented (GBIF records). Then, we present the total number of records after been removed those with no latitude, longitude and locality; duplicates at 0.5-degree spatial resolution; coordinates located in capitals; coordinates with latitude equal to longitude or equal to exactly zero; and corrected country references (cleaned GBIF records). Finally, we present the total number of records after treatment with kernel density estimate function over coordinate point patterns to remove spatial outliers (kernel-density estimate GBIF records).

| <b>Species</b>            | <b>N GBIF records</b> | <b>N cleaned GBIF records</b> | <b>N cleaned GBIF records (% GBIF records)</b> | <b>N kernel-density estimate GBIF records</b> | <b>kernel density estimate GBIF records (% GBIF records)</b> |
|---------------------------|-----------------------|-------------------------------|------------------------------------------------|-----------------------------------------------|--------------------------------------------------------------|
| Abarema_jupunba           | 751                   | 521                           | 69.37                                          | 503                                           | 66.98                                                        |
| Acosmium_cardenasii       | 69                    | 58                            | 84.06                                          | 53                                            | 76.81                                                        |
| Alexa_imperatricis        | 24                    | 10                            | 41.67                                          | 9                                             | 37.50                                                        |
| Amaioua_guianensis        | 825                   | 428                           | 51.88                                          | 380                                           | 46.06                                                        |
| Amphiodon_effusus         | 89                    | 62                            | 69.66                                          | 61                                            | 68.54                                                        |
| Aparisthium_cordatum      | 1239                  | 733                           | 59.16                                          | 670                                           | 54.08                                                        |
| Apeiba_glabra             | 476                   | 313                           | 65.76                                          | 289                                           | 60.71                                                        |
| Apeiba_tibourbou          | 1554                  | 976                           | 62.81                                          | 662                                           | 42.60                                                        |
| Aspidosperma_excelsum     | 450                   | 280                           | 62.22                                          | 260                                           | 57.78                                                        |
| Astrocaryum_aculeatum     | 1774                  | 174                           | 9.81                                           | 170                                           | 9.58                                                         |
| Astrocaryum_murumuru      | 143                   | 73                            | 51.05                                          | 69                                            | 48.25                                                        |
| Astrocaryum_sciophilum    | 28                    | 7                             | 25.00                                          | 6                                             | 21.43                                                        |
| Attalea_butyracea         | 12821                 | 198                           | 1.54                                           | 184                                           | 1.44                                                         |
| Attalea_maripa            | 2946                  | 232                           | 7.88                                           | 226                                           | 7.67                                                         |
| Attalea_phalerata         | 14961                 | 289                           | 1.93                                           | 279                                           | 1.86                                                         |
| Attalea_speciosa          | 95                    | 55                            | 57.89                                          | 49                                            | 51.58                                                        |
| Bertholletia_excelsa      | 266                   | 130                           | 48.87                                          | 124                                           | 46.62                                                        |
| Bocageopsis_multiflora    | 397                   | 242                           | 60.96                                          | 239                                           | 60.20                                                        |
| Brosimum_guianense        | 249                   | 172                           | 69.08                                          | 121                                           | 48.59                                                        |
| Brosimum_lactescens       | 977                   | 504                           | 51.59                                          | 385                                           | 39.41                                                        |
| Brosimum_rubescens        | 455                   | 213                           | 46.81                                          | 203                                           | 44.62                                                        |
| Brosimum_utile            | 437                   | 221                           | 50.57                                          | 171                                           | 39.13                                                        |
| Calophyllum_brasiliense   | 1733                  | 1075                          | 62.03                                          | 686                                           | 39.58                                                        |
| Campsiandra_implexicaulis | 34                    | 22                            | 64.71                                          | 20                                            | 58.82                                                        |
| Caraipa_densifolia        | 473                   | 319                           | 67.44                                          | 314                                           | 66.38                                                        |
| Carapa_guianensis         | 3084                  | 333                           | 10.80                                          | 197                                           | 6.39                                                         |
| Caryocar_glabrum          | 439                   | 286                           | 65.15                                          | 283                                           | 64.46                                                        |
| Catostemma_fragrans       | 35                    | 20                            | 57.14                                          | 18                                            | 51.43                                                        |
| Cecropia_latiloba         | 176                   | 74                            | 42.05                                          | 74                                            | 42.05                                                        |
| Cecropia_membranacea      | 238                   | 111                           | 46.64                                          | 104                                           | 43.70                                                        |
| Cecropia_sciadophylla     | 347                   | 178                           | 51.30                                          | 175                                           | 50.43                                                        |
| Cedrelinga_cateniformis   | 258                   | 155                           | 60.08                                          | 150                                           | 58.14                                                        |

| <b>Species</b>               | <b>N GBIF records</b> | <b>N cleaned GBIF records</b> | <b>N cleaned GBIF records (% GBIF records)</b> | <b>N kernel-density estimate GBIF records</b> | <b>kernel density estimate GBIF records (% GBIF records)</b> |
|------------------------------|-----------------------|-------------------------------|------------------------------------------------|-----------------------------------------------|--------------------------------------------------------------|
| Celtis_schippii              | 423                   | 244                           | 57.68                                          | 188                                           | 44.44                                                        |
| Cenostigma_tocantinum        | 73                    | 28                            | 38.36                                          | 21                                            | 28.77                                                        |
| Cheiloclinium_cognatum       | 1596                  | 805                           | 50.44                                          | 716                                           | 44.86                                                        |
| Chlorocardium_rodiei         | 47                    | 13                            | 27.66                                          | 13                                            | 27.66                                                        |
| Chrysophyllum_sanguinolentum | 708                   | 213                           | 30.08                                          | 206                                           | 29.10                                                        |
| Clarisia_racemosa            | 623                   | 302                           | 48.48                                          | 267                                           | 42.86                                                        |
| Clathrotropis_glaucophylla   | 50                    | 44                            | 88.00                                          | 40                                            | 80.00                                                        |
| Clathrotropis_macrocarpa     | 350                   | 160                           | 45.71                                          | 148                                           | 42.29                                                        |
| Conceveiba_guianensis        | 555                   | 304                           | 54.77                                          | 297                                           | 53.51                                                        |
| Cordia_bicolor               | 475                   | 295                           | 62.11                                          | 198                                           | 41.68                                                        |
| Couepia_guianensis           | 345                   | 173                           | 50.14                                          | 158                                           | 45.80                                                        |
| Couepia_paraensis            | 275                   | 187                           | 68.00                                          | 185                                           | 67.27                                                        |
| Crateva_tapia                | 1573                  | 1001                          | 63.64                                          | 350                                           | 22.25                                                        |
| Cynometra_marginata          | 121                   | 52                            | 42.98                                          | 49                                            | 40.50                                                        |
| Dialium_guianense            | 1551                  | 867                           | 55.90                                          | 624                                           | 40.23                                                        |
| Dicymbe_corymbosa            | 6                     | 5                             | 83.33                                          | 4                                             | 66.67                                                        |
| Diplotropis_purpurea         | 204                   | 120                           | 58.82                                          | 112                                           | 54.90                                                        |
| Drypetes_amazonica           | 381                   | 169                           | 44.36                                          | 162                                           | 42.52                                                        |
| Ecclinusa_guianensis         | 155                   | 75                            | 48.39                                          | 72                                            | 46.45                                                        |
| Enterolobium_schomburgkii    | 406                   | 236                           | 58.13                                          | 181                                           | 44.58                                                        |
| Eperua_falcata               | 234                   | 62                            | 26.50                                          | 57                                            | 24.36                                                        |
| Eperua_grandiflora           | 90                    | 20                            | 22.22                                          | 18                                            | 20.00                                                        |
| Eperua_leucantha             | 127                   | 70                            | 55.12                                          | 64                                            | 50.39                                                        |
| Eperua_purpurea              | 107                   | 66                            | 61.68                                          | 61                                            | 57.01                                                        |
| Erisma_uncinatum             | 277                   | 134                           | 48.38                                          | 130                                           | 46.93                                                        |
| Eschweilera_albiflora        | 383                   | 226                           | 59.01                                          | 221                                           | 57.70                                                        |
| Eschweilera_amazonica        | 108                   | 50                            | 46.30                                          | 47                                            | 43.52                                                        |
| Eschweilera_atropetiolata    | 194                   | 51                            | 26.29                                          | 47                                            | 24.23                                                        |
| Eschweilera_bracteosa        | 218                   | 132                           | 60.55                                          | 125                                           | 57.34                                                        |
| Eschweilera_coriacea         | 2066                  | 725                           | 35.09                                          | 687                                           | 33.25                                                        |
| Eschweilera_decolorans       | 128                   | 64                            | 50.00                                          | 63                                            | 49.22                                                        |
| Eschweilera_grandiflora      | 167                   | 73                            | 43.71                                          | 67                                            | 40.12                                                        |

| <b>Species</b>           | <b>N GBIF records</b> | <b>N cleaned GBIF records</b> | <b>N cleaned GBIF records (% GBIF records)</b> | <b>N kernel-density estimate GBIF records</b> | <b>kernel density estimate GBIF records (% GBIF records)</b> |
|--------------------------|-----------------------|-------------------------------|------------------------------------------------|-----------------------------------------------|--------------------------------------------------------------|
| Eschweilera_parviflora   | 265                   | 162                           | 61.13                                          | 161                                           | 60.75                                                        |
| Eschweilera_parvifolia   | 418                   | 274                           | 65.55                                          | 267                                           | 63.88                                                        |
| Eschweilera_pedicellata  | 640                   | 312                           | 48.75                                          | 308                                           | 48.13                                                        |
| Eschweilera_sagotiana    | 136                   | 53                            | 38.97                                          | 52                                            | 38.24                                                        |
| Eschweilera_tessmannii   | 446                   | 192                           | 43.05                                          | 187                                           | 41.93                                                        |
| Eschweilera_truncata     | 221                   | 77                            | 34.84                                          | 75                                            | 33.94                                                        |
| Eschweilera_wachenheimii | 156                   | 59                            | 37.82                                          | 56                                            | 35.90                                                        |
| Euterpe_oleracea         | 2868                  | 105                           | 3.66                                           | 76                                            | 2.65                                                         |
| Euterpe_precatoria       | 24604                 | 953                           | 3.87                                           | 853                                           | 3.47                                                         |
| Garcinia_macrophylla     | 482                   | 365                           | 75.73                                          | 291                                           | 60.37                                                        |
| Geissospermum_sericeum   | 35                    | 23                            | 65.71                                          | 22                                            | 62.86                                                        |
| Goupia_glabra            | 641                   | 304                           | 47.43                                          | 294                                           | 45.87                                                        |
| Guapira_venosa           | 51                    | 26                            | 50.98                                          | 22                                            | 43.14                                                        |
| Guarea_guidonia          | 2263                  | 1137                          | 50.24                                          | 949                                           | 41.94                                                        |
| Guarea_kunthiana         | 2532                  | 1278                          | 50.47                                          | 1082                                          | 42.73                                                        |
| Guarea_macrophylla       | 2617                  | 1285                          | 49.10                                          | 915                                           | 34.96                                                        |
| Guarea_silvatica         | 381                   | 245                           | 64.30                                          | 242                                           | 63.52                                                        |
| Gustavia_augusta         | 838                   | 431                           | 51.43                                          | 391                                           | 46.66                                                        |
| Gustavia_hexapetala      | 969                   | 391                           | 40.35                                          | 382                                           | 39.42                                                        |
| Handroanthus_barbatus    | 118                   | 91                            | 77.12                                          | 86                                            | 72.88                                                        |
| Haploclathra_cordata     | 45                    | 13                            | 28.89                                          | 13                                            | 28.89                                                        |
| Helicostylis_tomentosa   | 1170                  | 552                           | 47.18                                          | 530                                           | 45.30                                                        |
| Hevea_brasiliensis       | 645                   | 287                           | 44.50                                          | 199                                           | 30.85                                                        |
| Hevea_guianensis         | 901                   | 330                           | 36.63                                          | 321                                           | 35.63                                                        |
| Himatanthus_sucuuba      | 355                   | 259                           | 72.96                                          | 246                                           | 69.30                                                        |
| Hirtella_racemosa        | 2514                  | 1409                          | 56.05                                          | 1004                                          | 39.94                                                        |
| Hura_crepitans           | 966                   | 506                           | 52.38                                          | 212                                           | 21.95                                                        |
| Inga_alba                | 798                   | 429                           | 53.76                                          | 364                                           | 45.61                                                        |
| Inga_capitata            | 1319                  | 721                           | 54.66                                          | 656                                           | 49.73                                                        |
| Inga_edulis              | 1509                  | 851                           | 56.39                                          | 677                                           | 44.86                                                        |
| Inga_lateriflora         | 132                   | 60                            | 45.45                                          | 57                                            | 43.18                                                        |
| Inga_marginata           | 118                   | 71                            | 60.17                                          | 21                                            | 17.80                                                        |

| <b>Species</b>            | <b>N GBIF records</b> | <b>N cleaned GBIF records</b> | <b>N cleaned GBIF records (% GBIF records)</b> | <b>N kernel-density estimate GBIF records</b> | <b>kernel density estimate GBIF records (% GBIF records)</b> |
|---------------------------|-----------------------|-------------------------------|------------------------------------------------|-----------------------------------------------|--------------------------------------------------------------|
| Inga_rubiginosa           | 114                   | 54                            | 47.37                                          | 51                                            | 44.74                                                        |
| Inga_thibaudiana          | 1627                  | 950                           | 58.39                                          | 723                                           | 44.44                                                        |
| Iriartea_deltoidea        | 20270                 | 573                           | 2.83                                           | 498                                           | 2.46                                                         |
| Iryanthera_juruensis      | 1585                  | 717                           | 45.24                                          | 699                                           | 44.10                                                        |
| Iryanthera_laevis         | 597                   | 274                           | 45.90                                          | 267                                           | 44.72                                                        |
| Iryanthera_ulei           | 1026                  | 456                           | 44.44                                          | 434                                           | 42.30                                                        |
| Jacaranda_copaia          | 816                   | 478                           | 58.58                                          | 420                                           | 51.47                                                        |
| Laetia_corymbulosa        | 77                    | 40                            | 51.95                                          | 37                                            | 48.05                                                        |
| Laetia_procera            | 640                   | 265                           | 41.41                                          | 195                                           | 30.47                                                        |
| Lecythis_corrugata        | 353                   | 197                           | 55.81                                          | 187                                           | 52.97                                                        |
| Lecythis_idatimon         | 251                   | 88                            | 35.06                                          | 71                                            | 28.29                                                        |
| Leonia_crassa             | 356                   | 231                           | 64.89                                          | 226                                           | 63.48                                                        |
| Leonia_glycycarpa         | 1029                  | 509                           | 49.47                                          | 501                                           | 48.69                                                        |
| Licania_alba              | 87                    | 26                            | 29.89                                          | 25                                            | 28.74                                                        |
| Licania_apetala           | 898                   | 448                           | 49.89                                          | 446                                           | 49.67                                                        |
| Licania_buxifolia         | 11                    | 5                             | 45.45                                          | 4                                             | 36.36                                                        |
| Licania_densiflora        | 81                    | 33                            | 40.74                                          | 30                                            | 37.04                                                        |
| Licania_heteromorpha      | 1303                  | 621                           | 47.66                                          | 603                                           | 46.28                                                        |
| Licania_kunthiana         | 364                   | 222                           | 60.99                                          | 193                                           | 53.02                                                        |
| Licania_micrantha         | 379                   | 226                           | 59.63                                          | 205                                           | 54.09                                                        |
| Licania_oblongifolia      | 84                    | 35                            | 41.67                                          | 34                                            | 40.48                                                        |
| Licania_octandra          | 42                    | 31                            | 73.81                                          | 23                                            | 54.76                                                        |
| Luehea_cymulosa           | 185                   | 120                           | 64.86                                          | 119                                           | 64.32                                                        |
| Mabea_nitida              | 591                   | 344                           | 58.21                                          | 335                                           | 56.68                                                        |
| Mabea_speciosa            | 367                   | 216                           | 58.86                                          | 213                                           | 58.04                                                        |
| Macrolobium_acaciifolium  | 903                   | 525                           | 58.14                                          | 519                                           | 57.48                                                        |
| Macrolobium_angustifolium | 366                   | 277                           | 75.68                                          | 272                                           | 74.32                                                        |
| Manilkara_bidentata       | 767                   | 290                           | 37.81                                          | 246                                           | 32.07                                                        |
| Maquira_coriacea          | 255                   | 93                            | 36.47                                          | 91                                            | 35.69                                                        |
| Matayba_scrobiculata      | 95                    | 36                            | 37.89                                          | 29                                            | 30.53                                                        |
| Matisia_ochrocalyx        | 789                   | 440                           | 55.77                                          | 367                                           | 46.51                                                        |
| Mauritia_flexuosa         | 3357                  | 230                           | 6.85                                           | 223                                           | 6.64                                                         |

| <b>Species</b>            | <b>N GBIF records</b> | <b>N cleaned GBIF records</b> | <b>N cleaned GBIF records (% GBIF records)</b> | <b>N kernel-density estimate GBIF records</b> | <b>kernel density estimate GBIF records (% GBIF records)</b> |
|---------------------------|-----------------------|-------------------------------|------------------------------------------------|-----------------------------------------------|--------------------------------------------------------------|
| Mauritiella_aculeata      | 816                   | 59                            | 7.23                                           | 58                                            | 7.11                                                         |
| Metrodorea_flavida        | 392                   | 229                           | 58.42                                          | 215                                           | 54.85                                                        |
| Mezilaurus_itauba         | 194                   | 98                            | 50.52                                          | 97                                            | 50.00                                                        |
| Micrandra_elata           | 104                   | 43                            | 41.35                                          | 40                                            | 38.46                                                        |
| Micrandra_glabra          | 27                    | 9                             | 33.33                                          | 9                                             | 33.33                                                        |
| Micrandra_spruceana       | 319                   | 116                           | 36.36                                          | 114                                           | 35.74                                                        |
| Micrandra_sprucei         | 82                    | 37                            | 45.12                                          | 34                                            | 41.46                                                        |
| Micropholis_gardneriana   | 257                   | 130                           | 50.58                                          | 121                                           | 47.08                                                        |
| Micropholis_guyanensis    | 1291                  | 607                           | 47.02                                          | 558                                           | 43.22                                                        |
| Micropholis_venulosa      | 980                   | 525                           | 53.57                                          | 492                                           | 50.20                                                        |
| Minuartia_guianensis      | 786                   | 404                           | 51.40                                          | 321                                           | 40.84                                                        |
| Mollia_gracilis           | 135                   | 67                            | 49.63                                          | 63                                            | 46.67                                                        |
| Monopteryx_uaucu          | 55                    | 43                            | 78.18                                          | 40                                            | 72.73                                                        |
| Mora_excelsa              | 42                    | 13                            | 30.95                                          | 10                                            | 23.81                                                        |
| Mora_gonggrijpii          | 13                    | 6                             | 46.15                                          | 6                                             | 46.15                                                        |
| Ocotea_aciphylla          | 1154                  | 570                           | 49.39                                          | 508                                           | 44.02                                                        |
| Ocotea_cernua             | 1399                  | 737                           | 52.68                                          | 476                                           | 34.02                                                        |
| Oenocarpus_bacaba         | 3076                  | 85                            | 2.76                                           | 83                                            | 2.70                                                         |
| Oenocarpus_bataua         | 52272                 | 565                           | 1.08                                           | 546                                           | 1.04                                                         |
| Osteophloeum_platyspermum | 772                   | 364                           | 47.15                                          | 340                                           | 44.04                                                        |
| Otoba_parvifolia          | 973                   | 389                           | 39.98                                          | 372                                           | 38.23                                                        |
| Oxandra_polyantha         | 139                   | 66                            | 47.48                                          | 62                                            | 44.60                                                        |
| Pachira_brevipes          | 187                   | 46                            | 24.60                                          | 42                                            | 22.46                                                        |
| Pentaclethra_maculoba     | 399                   | 237                           | 59.40                                          | 113                                           | 28.32                                                        |
| Poulsenia_armata          | 489                   | 280                           | 57.26                                          | 175                                           | 35.79                                                        |
| Pourouma_bicolor          | 3171                  | 518                           | 16.34                                          | 386                                           | 12.17                                                        |
| Pourouma_cecropiifolia    | 410                   | 258                           | 62.93                                          | 248                                           | 60.49                                                        |
| Pourouma_guianensis       | 802                   | 406                           | 50.62                                          | 383                                           | 47.76                                                        |
| Pourouma_minor            | 733                   | 379                           | 51.71                                          | 340                                           | 46.38                                                        |
| Pouteria_caimito          | 905                   | 521                           | 57.57                                          | 474                                           | 52.38                                                        |
| Pouteria_cuspidata        | 738                   | 376                           | 50.95                                          | 353                                           | 47.83                                                        |
| Pouteria_elegans          | 250                   | 169                           | 67.60                                          | 168                                           | 67.20                                                        |

| <b>Species</b>              | <b>N GBIF records</b> | <b>N cleaned GBIF records</b> | <b>N cleaned GBIF records (% GBIF records)</b> | <b>N kernel-density estimate GBIF records</b> | <b>kernel density estimate GBIF records (% GBIF records)</b> |
|-----------------------------|-----------------------|-------------------------------|------------------------------------------------|-----------------------------------------------|--------------------------------------------------------------|
| Pouteria_guianensis         | 947                   | 497                           | 52.48                                          | 480                                           | 50.69                                                        |
| Pouteria_reticulata         | 1081                  | 553                           | 51.16                                          | 261                                           | 24.14                                                        |
| Protium_apiculatum          | 401                   | 175                           | 43.64                                          | 172                                           | 42.89                                                        |
| Protium_aracouchini         | 1121                  | 616                           | 54.95                                          | 556                                           | 49.60                                                        |
| Protium_decandrum           | 314                   | 133                           | 42.36                                          | 125                                           | 39.81                                                        |
| Protium_hebetatum           | 412                   | 141                           | 34.22                                          | 138                                           | 33.50                                                        |
| Protium_heptaphyllum        | 2753                  | 1484                          | 53.90                                          | 1342                                          | 48.75                                                        |
| Protium_sagotianum          | 573                   | 345                           | 60.21                                          | 338                                           | 58.99                                                        |
| Protium_tenuifolium         | 469                   | 252                           | 53.73                                          | 154                                           | 32.84                                                        |
| Protium_trifoliolatum       | 417                   | 238                           | 57.07                                          | 229                                           | 54.92                                                        |
| Pseudobombax_munguba        | 78                    | 58                            | 74.36                                          | 57                                            | 73.08                                                        |
| Pseudolmedia_laevigata      | 958                   | 449                           | 46.87                                          | 431                                           | 44.99                                                        |
| Pseudolmedia_laevis         | 1076                  | 442                           | 41.08                                          | 437                                           | 40.61                                                        |
| Pseudolmedia_macrophylla    | 374                   | 216                           | 57.75                                          | 216                                           | 57.75                                                        |
| Pseudopiptadenia_suaveolens | 107                   | 65                            | 60.75                                          | 47                                            | 43.93                                                        |
| Pterocarpus_amazonum        | 285                   | 201                           | 70.53                                          | 199                                           | 69.82                                                        |
| Pterocarpus_rohrii          | 1062                  | 528                           | 49.72                                          | 318                                           | 29.94                                                        |
| Pterocarpus_santalinooides  | 727                   | 431                           | 59.28                                          | 182                                           | 25.03                                                        |
| Qualea_paraensis            | 323                   | 179                           | 55.42                                          | 160                                           | 49.54                                                        |
| Quararibea_guianensis       | 143                   | 93                            | 65.03                                          | 87                                            | 60.84                                                        |
| Quararibea_wittii           | 222                   | 109                           | 49.10                                          | 100                                           | 45.05                                                        |
| Rinorea_guianensis          | 30                    | 23                            | 76.67                                          | 21                                            | 70.00                                                        |
| Rinorea_racemosa            | 360                   | 186                           | 51.67                                          | 181                                           | 50.28                                                        |
| Rinoreocarpus_ulei          | 420                   | 253                           | 60.24                                          | 250                                           | 59.52                                                        |
| Sacoglottis_guianensis      | 302                   | 177                           | 58.61                                          | 169                                           | 55.96                                                        |
| Sacoglottis_mattogrossensis | 379                   | 221                           | 58.31                                          | 185                                           | 48.81                                                        |
| Sagotia_brachysepala        | 183                   | 98                            | 53.55                                          | 90                                            | 49.18                                                        |
| Sagotia_racemosa            | 356                   | 220                           | 61.80                                          | 208                                           | 58.43                                                        |
| Scleronema_micranthum       | 418                   | 151                           | 36.12                                          | 139                                           | 33.25                                                        |
| Senefeldera_inclinata       | 109                   | 73                            | 66.97                                          | 69                                            | 63.30                                                        |
| Simarouba_amara             | 1330                  | 782                           | 58.80                                          | 605                                           | 45.49                                                        |
| Siparuna_decipiens          | 919                   | 383                           | 41.68                                          | 373                                           | 40.59                                                        |

| <b>Species</b>             | <b>N GBIF records</b> | <b>N cleaned GBIF records</b> | <b>N cleaned GBIF records (% GBIF records)</b> | <b>N kernel-density estimate GBIF records</b> | <b>kernel density estimate GBIF records (% GBIF records)</b> |
|----------------------------|-----------------------|-------------------------------|------------------------------------------------|-----------------------------------------------|--------------------------------------------------------------|
| Sloanea_eichleri           | 174                   | 116                           | 66.67                                          | 111                                           | 63.79                                                        |
| Socratea_exorrhiza         | 19519                 | 775                           | 3.97                                           | 710                                           | 3.64                                                         |
| Spondias_mombin            | 406                   | 245                           | 60.34                                          | 78                                            | 19.21                                                        |
| Sterculia_pruriens         | 174                   | 83                            | 47.70                                          | 82                                            | 47.13                                                        |
| Swartzia_leiocalycina      | 18                    | 18                            | 100.00                                         | 16                                            | 88.89                                                        |
| Swartzia_polyphylla        | 475                   | 262                           | 55.16                                          | 250                                           | 52.63                                                        |
| Symphonia_globulifera      | 335                   | 106                           | 31.64                                          | 68                                            | 20.30                                                        |
| Tachigali_chrysophylla     | 87                    | 48                            | 55.17                                          | 46                                            | 52.87                                                        |
| Tachigali_paniculata       | 474                   | 232                           | 48.95                                          | 226                                           | 47.68                                                        |
| Tachigali_rugosa           | 95                    | 54                            | 56.84                                          | 50                                            | 52.63                                                        |
| Tapirira_guianensis        | 5272                  | 2541                          | 48.20                                          | 2237                                          | 42.43                                                        |
| Tetragastris_altissima     | 412                   | 259                           | 62.86                                          | 255                                           | 61.89                                                        |
| Tetragastris_panamensis    | 1165                  | 577                           | 49.53                                          | 378                                           | 32.45                                                        |
| Theobroma_cacao            | 1172                  | 476                           | 40.61                                          | 330                                           | 28.16                                                        |
| Theobroma_speciosum        | 293                   | 178                           | 60.75                                          | 175                                           | 59.73                                                        |
| Theobroma_subincanum       | 829                   | 471                           | 56.82                                          | 466                                           | 56.21                                                        |
| Trattinnickia_burserifolia | 294                   | 155                           | 52.72                                          | 151                                           | 51.36                                                        |
| Trichilia_micrantha        | 392                   | 233                           | 59.44                                          | 229                                           | 58.42                                                        |
| Trichilia_pleeana          | 823                   | 426                           | 51.76                                          | 368                                           | 44.71                                                        |
| Trichilia_quadrijuga       | 707                   | 393                           | 55.59                                          | 286                                           | 40.45                                                        |
| Triplaris_weigeltiana      | 140                   | 78                            | 55.71                                          | 71                                            | 50.71                                                        |
| Unonopsis_guatterioides    | 1121                  | 615                           | 54.86                                          | 604                                           | 53.88                                                        |
| Vatairea_guianensis        | 145                   | 97                            | 66.90                                          | 92                                            | 63.45                                                        |
| Virola_calophylla          | 1449                  | 636                           | 43.89                                          | 628                                           | 43.34                                                        |
| Virola_elongata            | 1736                  | 848                           | 48.85                                          | 826                                           | 47.58                                                        |
| Virola_michelii            | 283                   | 106                           | 37.46                                          | 98                                            | 34.63                                                        |
| Virola_pavonis             | 866                   | 392                           | 45.27                                          | 377                                           | 43.53                                                        |
| Virola_sebifera            | 2604                  | 1283                          | 49.27                                          | 1030                                          | 39.55                                                        |
| Virola_surinamensis        | 691                   | 376                           | 54.41                                          | 316                                           | 45.73                                                        |
| Vitex_cymosa               | 315                   | 215                           | 68.25                                          | 189                                           | 60.00                                                        |
| Vouacapoua_americana       | 91                    | 32                            | 35.16                                          | 26                                            | 28.57                                                        |
| Xylopia_amazonica          | 113                   | 81                            | 71.68                                          | 79                                            | 69.91                                                        |

|                  | <b>Species</b> | <b>N GBIF records</b> | <b>N cleaned GBIF records</b> | <b>N cleaned GBIF records (% GBIF records)</b> | <b>N kernel-density estimate GBIF records</b> | <b>kernel density estimate GBIF records (% GBIF records)</b> |
|------------------|----------------|-----------------------|-------------------------------|------------------------------------------------|-----------------------------------------------|--------------------------------------------------------------|
| Zygia_cataractae |                | 524                   | 359                           | 68.51                                          | 349                                           | 66.60                                                        |
| Zygia_latifolia  |                | 514                   | 360                           | 70.04                                          | 285                                           | 55.45                                                        |
| Zygia_racemosa   |                | 242                   | 129                           | 53.31                                          | 124                                           | 51.24                                                        |
